# Supplementary material for: Identification of regulators of poly-ADP-ribose polymerase inhibitor response through complementary CRISPR knockout and activation screens
Source: PubMed Central journal article supplement (PMC7704667; doi:10.1038/s41467-020-19961-w), 2020-11-30
Supplement: 41467_2020_19961_MOESM7_ESM.pdf [file 41467_2020_19961_MOESM7_ESM.pdf]

## Reporting Summary

Nature Research wishes to improve the reproducibility of the work that we publish. This form provides structure for consistency and transparency in reporting. For further information on Nature Research policies, see our [Editorial Policies](#) and the [Editorial Policy Checklist](#).

### Statistics

For all statistical analyses, confirm that the following items are present in the figure legend, table legend, main text, or Methods section.

n/a Confirmed

- |                                     |                                     |                                                                                                                                                                                                                                                            |
|-------------------------------------|-------------------------------------|------------------------------------------------------------------------------------------------------------------------------------------------------------------------------------------------------------------------------------------------------------|
| <input type="checkbox"/>            | <input checked="" type="checkbox"/> | The exact sample size ( $n$ ) for each experimental group/condition, given as a discrete number and unit of measurement                                                                                                                                    |
| <input type="checkbox"/>            | <input checked="" type="checkbox"/> | A statement on whether measurements were taken from distinct samples or whether the same sample was measured repeatedly                                                                                                                                    |
| <input type="checkbox"/>            | <input checked="" type="checkbox"/> | The statistical test(s) used AND whether they are one- or two-sided<br><i>Only common tests should be described solely by name; describe more complex techniques in the Methods section.</i>                                                               |
| <input checked="" type="checkbox"/> | <input type="checkbox"/>            | A description of all covariates tested                                                                                                                                                                                                                     |
| <input checked="" type="checkbox"/> | <input type="checkbox"/>            | A description of any assumptions or corrections, such as tests of normality and adjustment for multiple comparisons                                                                                                                                        |
| <input type="checkbox"/>            | <input checked="" type="checkbox"/> | A full description of the statistical parameters including central tendency (e.g. means) or other basic estimates (e.g. regression coefficient) AND variation (e.g. standard deviation) or associated estimates of uncertainty (e.g. confidence intervals) |
| <input type="checkbox"/>            | <input checked="" type="checkbox"/> | For null hypothesis testing, the test statistic (e.g. $F$ , $t$ , $r$ ) with confidence intervals, effect sizes, degrees of freedom and $P$ value noted<br><i>Give <math>P</math> values as exact values whenever suitable.</i>                            |
| <input checked="" type="checkbox"/> | <input type="checkbox"/>            | For Bayesian analysis, information on the choice of priors and Markov chain Monte Carlo settings                                                                                                                                                           |
| <input checked="" type="checkbox"/> | <input type="checkbox"/>            | For hierarchical and complex designs, identification of the appropriate level for tests and full reporting of outcomes                                                                                                                                     |
| <input checked="" type="checkbox"/> | <input type="checkbox"/>            | Estimates of effect sizes (e.g. Cohen's $d$ , Pearson's $r$ ), indicating how they were calculated                                                                                                                                                         |

*Our web collection on [statistics for biologists](#) contains articles on many of the points above.*

### Software and code

Policy information about [availability of computer code](#)

Data collection 1) Microscopy (Immunofluorescence, DNA Fiber Combing, Comet assay): LASX 3.3.0.16799  
2) Flow Cytometry: BD FACSDiva 8.0.1

Data analysis 1) DNA Fiber Combing: LASX 3.3.0.16799  
2) Immunofluorescence: ImageJ 1.52p  
3) Flow Cytometry: FlowJo v10  
4) Comet Assay analyses: CometScore 2.0  
5) Statistics and Data Figure Panels: GraphPad Prism 8 and Microsoft Excel 15  
6) CRISPR screen analyses: MAGeCK 0.5.6 (obtained from <https://sourceforge.net/p/mageck/wiki/libraries/>)  
7) Survival analyses: R survival package version 2.41-3

For manuscripts utilizing custom algorithms or software that are central to the research but not yet described in published literature, software must be made available to editors and reviewers. We strongly encourage code deposition in a community repository (e.g. GitHub). See the Nature Research [guidelines for submitting code & software](#) for further information.

### Data

Policy information about [availability of data](#)

All manuscripts must include a [data availability statement](#). This statement should provide the following information, where applicable:

- Accession codes, unique identifiers, or web links for publicly available datasets
- A list of figures that have associated raw data
- A description of any restrictions on data availability

Data supporting the findings of this manuscript are available from the corresponding author upon reasonable request. Read counts for all screens are provided in

Supplementary Data files. The source data underlying Figs. 1b, d, f, 2a-c, 3a-f, 4a-d, 5a-d, 6a-c, 7a-c, and Supplementary Figs. 1a-b, 2a-b, 3a-b, 4a-b, 6a-f, 7a-b, 8a-b, 9a-c, 10a-b, 11a-b, 13a-b are provided as a Source Data file.

Genomic and transcriptomic data for the OV-AU cohort was obtained from <https://dcc.icgc.org/projects/OV-AU> and <https://xenabrowser.net/datapages/?hub=https://tcga.xenahubs.net:443>.

## Field-specific reporting

Please select the one below that is the best fit for your research. If you are not sure, read the appropriate sections before making your selection.

Life sciences  Behavioural & social sciences  Ecological, evolutionary & environmental sciences

For a reference copy of the document with all sections, see [nature.com/documents/nr-reporting-summary-flat.pdf](https://www.nature.com/documents/nr-reporting-summary-flat.pdf)

## Life sciences study design

All studies must disclose on these points even when the disclosure is negative.

|                 |                                                                                                                                                                                                                                                                                                                                                                                                                                                                                                                                                                                                                                                                                                                                                                           |
|-----------------|---------------------------------------------------------------------------------------------------------------------------------------------------------------------------------------------------------------------------------------------------------------------------------------------------------------------------------------------------------------------------------------------------------------------------------------------------------------------------------------------------------------------------------------------------------------------------------------------------------------------------------------------------------------------------------------------------------------------------------------------------------------------------|
| Sample size     | No statistical method was used to predetermine sample size. Sample size was determined based on previous experiments and relevant literature in the field (eg Sanson et al., PMID: 30575746; Lemacon et al, PMID: 29038425). Statistical significance was obtained with these sample size.                                                                                                                                                                                                                                                                                                                                                                                                                                                                                |
| Data exclusions | No data was excluded from the analysis.                                                                                                                                                                                                                                                                                                                                                                                                                                                                                                                                                                                                                                                                                                                                   |
| Replication     | The three CRISPR screens were performed in duplicate. Western blot experiments, DNA fiber assays, immunofluorescence and comet assays were performed at least twice (with the exception of Supplementary Fig. 9b and 11, which were only done once). All results were reproducible. The experiment in Supplementary Fig. 9b was only performed once because it is a negative result and it addresses an issue not directly linked to the theme of the manuscript and is thus inconsequential. The experiment in Supplementary Fig. 11 was only done once because of time constraints during the revision. The drug sensitivity assays were replicated independently for the number of times indicated in the figure legends. All attempts at replication were successful. |
| Randomization   | Samples were randomly allocated into experimental groups. Samples were processed and analyzed in random order.                                                                                                                                                                                                                                                                                                                                                                                                                                                                                                                                                                                                                                                            |
| Blinding        | For imaging-based assays, samples were tested at least once under blinding conditions, and results were reproduced. Blinding is less feasible for the other assays (such as those western blot-based) and was not performed. However, these results were reproduced independently by at least two different authors.                                                                                                                                                                                                                                                                                                                                                                                                                                                      |

## Reporting for specific materials, systems and methods

We require information from authors about some types of materials, experimental systems and methods used in many studies. Here, indicate whether each material, system or method listed is relevant to your study. If you are not sure if a list item applies to your research, read the appropriate section before selecting a response.

### Materials & experimental systems

| n/a                                 | Involved in the study                                     |
|-------------------------------------|-----------------------------------------------------------|
| <input type="checkbox"/>            | <input checked="" type="checkbox"/> Antibodies            |
| <input type="checkbox"/>            | <input checked="" type="checkbox"/> Eukaryotic cell lines |
| <input checked="" type="checkbox"/> | <input type="checkbox"/> Palaeontology and archaeology    |
| <input checked="" type="checkbox"/> | <input type="checkbox"/> Animals and other organisms      |
| <input checked="" type="checkbox"/> | <input type="checkbox"/> Human research participants      |
| <input checked="" type="checkbox"/> | <input type="checkbox"/> Clinical data                    |
| <input checked="" type="checkbox"/> | <input type="checkbox"/> Dual use research of concern     |

### Methods

| n/a                                 | Involved in the study                              |
|-------------------------------------|----------------------------------------------------|
| <input checked="" type="checkbox"/> | <input type="checkbox"/> ChIP-seq                  |
| <input type="checkbox"/>            | <input checked="" type="checkbox"/> Flow cytometry |
| <input checked="" type="checkbox"/> | <input type="checkbox"/> MRI-based neuroimaging    |

## Antibodies

### Antibodies used

Antibodies used for western blots were: ABCB1 (Santa Cruz Biotechnology, sc-13131), GAPDH (Santa Cruz Biotechnology, sc-47724), KAT5 (Santa Cruz Biotechnology, sc-166323), HUWE1 (Bethyl, A300-486A), Vinculin (Santa Cruz Biotechnology, sc-25336), 53BP1 (Bethyl, A300-272A), CTIP (Santa Cruz Biotechnology, sc-271339), LIG1 (Bethyl, A301-136A), PARP1 (Cell Signaling, 9542), PCNA (Cell Signaling, 2586), Cas9 (BioLegend 844302), Histone H2B (Cell Signaling, 12364), Lamin B1 (Abcam ab16048), RAD51 (Santa Cruz Biotechnology, sc-8349). All antibodies were used at a dilution of 1:500. Uncropped scans of all blots, including molecular weight markers, are provided as a Source Data file.

Antibodies used for immunofluorescence were: 53BP1 (Bethyl A300-272A), gH2AX (Bethyl A300-081A), AlexaFluor 488 (Invitrogen A11008).

For DNA fiber staining, primary antibodies used were: Anti-BrdU BU1/75 (Abcam, 6326) for detection of CldU; Anti-BrdU B44 (BD, 347580) for detection of IdU; Anti-single stranded DNA (Millipore Sigma, MAB3034) for detection of DNA. Secondary antibodies used were: Anti-mouse Cy3.5 preadsorbed (Abcam, 6946); Anti-rat Cy5 preadsorbed (Abcam, 6565); Anti-rabbit BV480-conjugated (BD

Biosciences, 564879).

## Validation

ABCB1: <https://datasheets.scbt.com/sc-13131.pdf> and Figure 2a  
 GAPDH: <https://www.scbt.com/p/gapdh-antibody-0411>  
 KAT5: <https://www.scbt.com/p/tip60-antibody-c-7> and Supplementary figure 6a  
 HJUWE1: <https://www.bethyl.com/product/A300-486A> and Supplementary figure 6c  
 Vinculin: <https://www.scbt.com/p/vinculin-antibody-h-10>  
 53BP1: <https://www.bethyl.com/product/A300-272A>  
 CTIP: <https://www.scbt.com/p/ctip-antibody-d-4> and Supplementary figure 13a  
 LIG1 : <https://www.bethyl.com/product/A301-136A> and Supplementary figure 13a  
 PARP1: <https://www.cellsignal.com/products/primary-antibodies/parp-antibody/9542>  
 PCNA: <https://www.cellsignal.com/products/primary-antibodies/pcna-pc10-mouse-mab/2586>  
 Cas9: <https://www.biolegend.com/en-us/products/purified-anti-crispr-cas9-antibody-11774> and Supplementary figure 3a  
 Histone H2B: <https://www.cellsignal.com/products/primary-antibodies/histone-h2b-d2h6-rabbit-mab/12364>  
 Lamin B1: <https://www.abcam.com/lamin-b1-antibody-nuclear-envelope-marker-ab16048.html>  
 RAD51: <https://www.scbt.com/p/rad51-antibody-h-92> and Figure 4c  
 gH2AX: <https://www.bethyl.com/product/A300-081A>  
 Anti-BrdU BU1/75: <https://www.abcam.com/brdu-antibody-bu175-icr1-proliferation-marker-ab6326.html>  
 Anti-BrdU B44: <https://www.bdbiosciences.com/us/applications/research/apoptosis/purified-antibodies/purified-mouse-anti-brdu-b44/p/347580>  
 Anti-single stranded DNA: [https://www.emdmillipore.com/US/en/product/Anti-DNA-Antibody-single-stranded-clone-16-19,MM\\_NF-MAB3034](https://www.emdmillipore.com/US/en/product/Anti-DNA-Antibody-single-stranded-clone-16-19,MM_NF-MAB3034)

## Eukaryotic cell lines

### Policy information about [cell lines](#)

## Cell line source(s)

HeLa, U2OS, and RPE cells were obtained from ATCC. DLD1 cells were obtained from Dr. Robert Brosh (National Institute on Aging, NIH); the original source of this cell line is Horizon Discovery (HD105-007). U2OS-DSB reporter cells were obtained from Dr. Roger Greenberg (University of Pennsylvania) who created this cell line. U2OS DR-GFP cells were obtained from Dr. Jeremy Stark (City of Hope National Medical Center, Duarte, CA) who created this cell line.

## Authentication

Authentication was performed regularly based on morphology and gene/protein expression (in case of genetic alterations)

## Mycoplasma contamination

If found to be contaminated with mycoplasma, cell lines were treated with plasmocin.

Commonly misidentified lines  
(See [ICLAC](#) register)

None of the cell lines used are listed on the ICLAC register version 10

## Flow Cytometry

### Plots

## Confirm that:

- The axis labels state the marker and fluorochrome used (e.g. CD4-FITC).
- The axis scales are clearly visible. Include numbers along axes only for bottom left plot of group (a 'group' is an analysis of identical markers).
- All plots are contour plots with outliers or pseudocolor plots.
- A numerical value for number of cells or percentage (with statistics) is provided.

### Methodology

## Sample preparation

We used cell lines, thus no special sample preparation was needed.

## Instrument

BD FACSCanto 10

## Software

Data collection: BD FACSDiva 8.0.1  
Data analyses: FlowJo v10

## Cell population abundance

We used cell lines, thus population abundance is not an issue.

## Gating strategy

For the quantification of RPA-positive cells by flow cytometry, Cells were first gated using FSC-A/SSC-A, than G2/M cells were gated based on DAPI signal. The parameters were kept the same between samples. Supplementary Fig. 12 presents the gating strategy.

- Tick this box to confirm that a figure exemplifying the gating strategy is provided in the Supplementary Information.
