# Supplementary material for: Identification of regulators of poly-ADP-ribose polymerase inhibitor response through complementary CRISPR knockout and activation screens
Source: Nat Commun. 2020 Nov 30;11:6118. doi: 10.1038/s41467-020-19961-w (PMC7704667; doi:10.1038/s41467-020-19961-w)
Supplement: Supplementary file 4 — Supplementary Data 1 [file 41467_2020_19961_MOESM4_ESM.xlsx]

## Sheet: Gene rank
Gene name	Number of sgRNAs	Score negative selection	P-value negative selection	FDR negative selection	Rank negative selection	Number of good sgRNAs negative selection	Log2 fold change negative selection	Score positive selection	P-value positive selection	FDR positive selection	Rank positive selection	Number of good sgRNAs positive selection	Log2 fold change positive selection	Log(score negative selection)
RNASEH2B	4	4.62e-07	2.59e-06	0.049505	1	3	-0.59873	0.34829	0.48926	0.999996	9304	1	-0.59873	-6.33536
XRCC1	4	1.41e-06	6.48e-06	0.061056	2	3	-0.39673	0.25509	0.3892	0.999996	7426	1	-0.39673	-5.85078
CHTF8	4	2.26e-06	9.58e-06	0.061056	3	2	-0.31348	0.63904	0.67359	0.999996	12760	1	-0.31348	-5.64589
XRCC3	4	5.87e-06	2.25e-05	0.088119	4	3	-2.0616	0.95625	0.95628	0.999996	18242	0	-2.0616	-5.23136
RAD51C	4	6.11e-06	2.31e-05	0.088119	5	4	-1.1868	0.99999	1	0.999996	19113	0	-1.1868	-5.21396
C4orf27	4	1.07e-05	4.38e-05	0.139439	6	4	-0.28876	0.99795	0.998	0.999996	19055	0	-0.28876	-4.97062
CASC1	4	1.42e-05	5.78e-05	0.157709	7	3	-0.87431	0.84082	0.84097	0.999996	15984	0	-0.87431	-4.84771
RNASEH2C	4	2.02e-05	8.63e-05	0.206064	8	4	-0.48812	0.99994	0.99994	0.999996	19108	0	-0.48812	-4.69465
RNASEH2A	4	2.58e-05	0.00011163	0.237074	9	3	-0.39387	0.882	0.88205	0.999996	16752	0	-0.39387	-4.58838
CTGF	4	3.53e-05	0.00014427	0.252475	10	4	-0.337	0.99996	0.99997	0.999996	19112	0	-0.337	-4.45223
CCS	4	3.57e-05	0.00014531	0.252475	11	4	-0.40608	0.99996	0.99997	0.999996	19111	0	-0.40608	-4.44733
KIZ	4	5.16e-05	0.00020954	0.333746	12	4	-0.50806	0.99995	0.99995	0.999996	19110	0	-0.50806	-4.28735
MRE11A	4	5.92e-05	0.0002401	0.352068	13	4	-0.43572	0.99994	0.99995	0.999996	19109	0	-0.43572	-4.22768
FLG	4	6.86e-05	0.00028206	0.352068	14	2	-0.12855	0.059003	0.1372	0.986532	2649	1	-0.12855	-4.16368
HDDC2	4	7.59e-05	0.00030641	0.352068	15	4	-0.58643	0.99992	0.99993	0.999996	19107	0	-0.58643	-4.11976
POLE4	4	7.69e-05	0.00031159	0.352068	16	4	-0.41662	0.99921	0.99924	0.999996	19087	0	-0.41662	-4.11407
RNF125	4	7.75e-05	0.00031315	0.352068	17	3	-0.22176	0.65346	0.68295	0.999996	12936	1	-0.22176	-4.1107
FANCE	4	0.00010337	0.00039707	0.421617	18	4	-0.31107	0.9999	0.99991	0.999996	19106	0	-0.31107	-3.98561
C17orf70	4	0.00010847	0.00041934	0.421834	19	4	-0.6287	0.99966	0.99967	0.999996	19101	0	-0.6287	-3.96469
LRRC63	4	0.00011801	0.00046078	0.440347	20	4	-0.25481	0.99988	0.99989	0.999996	19105	0	-0.25481	-3.92808
LIG1	4	0.00012496	0.00048617	0.44248	21	3	-0.92786	0.98758	0.98764	0.999996	18846	0	-0.92786	-3.90323
CASD1	4	0.0001409	0.00055195	0.479523	22	2	-0.17189	0.59347	0.64574	0.999996	12247	1	-0.17189	-3.85109
PPIAL4F	4	0.00016256	0.00063225	0.518302	23	2	-0.28408	0.47766	0.58483	0.999996	11101	1	-0.28408	-3.78899
RIF1	4	0.00016996	0.00066074	0.518302	24	3	-0.43357	0.68071	0.70141	0.999996	13287	1	-0.43357	-3.76965
GCG	4	0.00018077	0.00070166	0.518302	25	3	-0.32036	0.15984	0.28683	0.993956	5515	1	-0.32036	-3.74287
ZNF662	4	0.00019317	0.00075036	0.518302	26	3	-0.34805	0.96984	0.96995	0.999996	18475	0	-0.34805	-3.71406
FGD3	4	0.00019588	0.0007602	0.518302	27	4	-0.21148	0.9998	0.99982	0.999996	19104	0	-0.21148	-3.70801
ITPA	4	0.00020435	0.00079439	0.518302	28	4	-0.25324	0.9998	0.99982	0.999996	19103	0	-0.25324	-3.68963
SIGLEC8	4	0.00022062	0.00085241	0.518302	29	2	-0.1276	0.25016	0.38392	0.999996	7315	2	-0.1276	-3.65636
FABP1	4	0.00022249	0.00085759	0.518302	30	3	-0.16887	0.97284	0.97298	0.999996	18541	0	-0.16887	-3.65269
NBN	4	0.00022814	0.00087831	0.518302	31	3	-0.41381	0.49389	0.59265	0.999996	11236	1	-0.41381	-3.6418
OR6C1	4	0.00023241	0.00089178	0.518302	32	2	-0.14184	0.37221	0.51469	0.999996	9789	1	-0.14184	-3.63375
RAD54L	4	0.00023348	0.00089489	0.518302	33	3	-0.45396	0.60619	0.65323	0.999996	12389	1	-0.45396	-3.63175
SYT4	4	0.00026136	0.0009902	0.556639	34	4	-0.3842	0.99974	0.99976	0.999996	19102	0	-0.3842	-3.58276
ZNF106	4	0.00028406	0.0010767	0.587977	35	3	-0.28909	0.9016	0.90161	0.999996	17120	0	-0.28909	-3.54659
SMCR8	4	0.0003036	0.0011523	0.599277	36	3	-0.24436	0.61461	0.65833	0.999996	12483	1	-0.24436	-3.5177
C19orf40	4	0.00030614	0.0011601	0.599277	37	4	-0.38551	0.99465	0.99473	0.999996	18993	0	-0.38551	-3.51408
CKS1B	4	0.0003607	0.0013419	0.634861	38	3	-0.31901	0.66809	0.69268	0.999996	13119	1	-0.31901	-3.44285
MELK	4	0.00037042	0.0013829	0.634861	39	4	-0.25126	0.99963	0.99965	0.999996	19100	0	-0.25126	-3.43131
ITLN2	4	0.00037933	0.0014248	0.634861	40	4	-0.28108	0.99962	0.99964	0.999996	19099	0	-0.28108	-3.42098
CLMP	4	0.0003829	0.0014378	0.634861	41	3	-0.30973	0.84087	0.84102	0.999996	15986	0	-0.30973	-3.41691
SWI5	4	0.00038734	0.0014497	0.634861	42	3	-0.49958	0.94421	0.94426	0.999996	17999	0	-0.49958	-3.41191
ANKRD24	4	0.00040105	0.001503	0.634861	43	4	-0.21702	0.9996	0.99962	0.999996	19098	0	-0.21702	-3.3968
RAD51B	4	0.00040908	0.001531	0.634861	44	4	-0.6911	0.99895	0.999	0.999996	19081	0	-0.6911	-3.38819
RASSF10	4	0.00042392	0.0015942	0.634861	45	4	-0.3597	0.99958	0.9996	0.999996	19097	0	-0.3597	-3.37272
G3BP1	4	0.00043897	0.0016471	0.634861	46	3	-0.40624	0.69054	0.70831	0.999996	13441	1	-0.40624	-3.35757
ACSF2	4	0.00044343	0.0016605	0.634861	47	4	-0.34171	0.99738	0.99746	0.999996	19043	0	-0.34171	-3.35317
SCAI	4	0.00048229	0.0018108	0.634861	48	2	-0.2437	0.27974	0.41579	0.999996	7893	2	-0.2437	-3.31669
TCF24	4	0.00049061	0.0018449	0.634861	49	2	-0.11929	0.89243	0.89244	0.999996	16938	0	-0.11929	-3.30926
MVB12A	4	0.0004918	0.0018491	0.634861	50	3	-0.20504	0.36677	0.50888	0.999996	9684	1	-0.20504	-3.30821
ERCC6	4	0.00049254	0.0018512	0.634861	51	3	-0.40656	0.58426	0.64046	0.999996	12145	1	-0.40656	-3.30756
MUS81	4	0.00049535	0.0018626	0.634861	52	3	-0.71695	0.92312	0.92317	0.999996	17563	0	-0.71695	-3.30509
ANKRD62	4	0.00050058	0.0018864	0.634861	53	4	-0.2363	0.9995	0.99952	0.999996	19096	0	-0.2363	-3.30053
DDX24	4	0.00050731	0.0019118	0.634861	54	4	-0.55998	0.9945	0.99458	0.999996	18988	0	-0.55998	-3.29473
YAP1	4	0.00051863	0.0019537	0.634861	55	4	-0.50506	0.99948	0.9995	0.999996	19095	0	-0.50506	-3.28514
PCDH8	4	0.00052987	0.0019905	0.634861	56	3	-0.267	0.96281	0.96289	0.999996	18359	0	-0.267	-3.27583
MAPK9	4	0.00053439	0.0020071	0.634861	57	3	-0.33657	0.36073	0.50248	0.999996	9567	1	-0.33657	-3.27214
AGMO	4	0.00054224	0.0020366	0.634861	58	2	-0.18582	0.95696	0.95704	0.999996	18254	0	-0.18582	-3.26581
PVRL1	4	0.00054309	0.0020413	0.634861	59	3	-0.41924	0.93756	0.93752	0.999996	17872	0	-0.41924	-3.26513
OSBPL9	4	0.00054311	0.0020413	0.634861	60	4	-0.59849	0.99203	0.9921	0.999996	18938	0	-0.59849	-3.26511
ZNF91	4	0.000546	0.0020511	0.634861	61	3	-0.26639	0.48294	0.58732	0.999996	11145	1	-0.26639	-3.26281
CHD1L	4	0.00054893	0.0020594	0.634861	62	3	-0.57364	0.30611	0.44424	0.999996	8431	1	-0.57364	-3.26048
STARD3	4	0.0005711	0.0021418	0.63825	63	4	-0.21407	0.99943	0.99945	0.999996	19094	0	-0.21407	-3.24329
DNAJC9	4	0.00058876	0.0022174	0.63825	64	4	-0.7994	0.99941	0.99944	0.999996	19093	0	-0.7994	-3.23006
RAD1	4	0.0005919	0.0022283	0.63825	65	3	-0.54329	0.98691	0.98698	0.999996	18832	0	-0.54329	-3.22775
RGS20	4	0.00059387	0.0022371	0.63825	66	1	0.052582	0.06281	0.14465	0.986532	2797	2	0.052582	-3.22631
POLE3	4	0.00059868	0.0022547	0.63825	67	4	-0.51402	0.9994	0.99943	0.999996	19092	0	-0.51402	-3.22281
C20orf173	4	0.00060285	0.0022708	0.63825	68	3	-0.2595	0.97687	0.97701	0.999996	18612	0	-0.2595	-3.21979
RAD51	4	0.00062234	0.0023516	0.645586	69	4	-1.1744	0.99833	0.99838	0.999996	19063	0	-1.1744	-3.20597
PAWR	4	0.00062766	0.0023764	0.645586	70	4	-0.22016	0.99937	0.9994	0.999996	19091	0	-0.22016	-3.20228
ASIC1	4	0.000633	0.0023982	0.645586	71	4	-0.25104	0.99937	0.9994	0.999996	19090	0	-0.25104	-3.1986
PARP10	4	0.00065376	0.0024733	0.656559	72	4	-0.26247	0.99935	0.99938	0.999996	19089	0	-0.26247	-3.18458
FIBIN	4	0.00069712	0.0026189	0.680462	73	2	-0.20985	0.74186	0.74775	0.999996	14187	1	-0.20985	-3.15669
IHH	4	0.00070928	0.0026562	0.680462	74	4	-0.32635	0.99821	0.99826	0.999996	19061	0	-0.32635	-3.14918
APEX2	4	0.00071261	0.0026702	0.680462	75	3	-0.22001	0.20334	0.33376	0.999996	6364	1	-0.22001	-3.14715
PGP	4	0.00073766	0.0027603	0.685517	76	4	-0.6153	0.99049	0.99058	0.999996	18911	0	-0.6153	-3.13214
AQP10	4	0.00074002	0.0027675	0.685517	77	2	-0.19831	0.15495	0.28154	0.993956	5404	2	-0.19831	-3.13076
PTH2	4	0.00074976	0.0027976	0.685517	78	4	-0.23264	0.99925	0.99928	0.999996	19088	0	-0.23264	-3.12508
FANCA	4	0.00078824	0.0029411	0.706332	79	3	-0.20731	0.89523	0.89525	0.999996	16991	0	-0.20731	-3.10334
CCNF	4	0.00080037	0.0029864	0.706332	80	4	-0.36198	0.99894	0.99899	0.999996	19080	0	-0.36198	-3.09671
ANKRD39	4	0.00080161	0.0029934	0.706332	81	4	-0.34592	0.9992	0.99923	0.999996	19086	0	-0.34592	-3.09604
SLC35F4	4	0.00081822	0.003054	0.710972	82	4	-0.28095	0.99918	0.99921	0.999996	19085	0	-0.28095	-3.08713
ZDHHC20	4	0.00083462	0.0031141	0.710972	83	3	-0.24267	0.73538	0.74248	0.999996	14083	1	-0.24267	-3.07851
IER3	4	0.00085199	0.0031711	0.710972	84	2	-0.16119	0.60236	0.65093	0.999996	12349	1	-0.16119	-3.06957
FOXI2	4	0.0008579	0.0031939	0.710972	85	4	-0.23742	0.99914	0.99918	0.999996	19084	0	-0.23742	-3.06656
NEK1	4	0.00085969	0.0031991	0.710972	86	3	-0.31021	0.76956	0.77134	0.999996	14646	1	-0.31021	-3.06566
SIRT7	4	0.00093909	0.0034829	0.765164	87	4	-0.25073	0.99906	0.99909	0.999996	19083	0	-0.25073	-3.02729
C7orf62	4	0.00096909	0.0035902	0.779759	88	4	-0.15535	0.99903	0.99907	0.999996	19082	0	-0.15535	-3.01364
PSMC3IP	4	0.00098864	0.0036482	0.783458	89	4	-0.44736	0.99677	0.99686	0.999996	19026	0	-0.44736	-3.00496
PSIP1	4	0.0010068	0.0037119	0.788284	90	3	-0.12227	0.87527	0.87533	0.999996	16615	0	-0.12227	-2.99706
MAU2	4	0.0010695	0.0039367	0.808787	91	3	-0.25622	0.98489	0.98499	0.999996	18784	0	-0.25622	-2.97082
POLR2B	4	0.0010717	0.003944	0.808787	92	4	-0.56219	0.99893	0.99898	0.999996	19079	0	-0.56219	-2.96993
SLC10A6	4	0.0011066	0.0040621	0.808787	93	3	-0.26153	0.97131	0.97142	0.999996	18513	0	-0.26153	-2.95601
STAC3	4	0.0011068	0.0040626	0.808787	94	2	-0.25088	0.93834	0.93831	0.999996	17887	0	-0.25088	-2.95593
HIST1H2AE	4	0.0011654	0.0042646	0.808787	95	3	-0.36855	0.50044	0.59596	0.999996	11306	1	-0.36855	-2.93352
KLHDC3	4	0.0011881	0.004347	0.808787	96	4	-0.30304	0.99881	0.99887	0.999996	19078	0	-0.30304	-2.92515
PTDSS1	4	0.0012148	0.0044537	0.808787	97	4	-0.52767	0.99879	0.99883	0.999996	19077	0	-0.52767	-2.9155
RAD54B	4	0.0012289	0.0045055	0.808787	98	4	-0.22113	0.99877	0.99882	0.999996	19076	0	-0.22113	-2.91048
PLEKHM3	4	0.0012297	0.0045102	0.808787	99	3	-0.26988	0.38073	0.52392	0.999996	9970	1	-0.26988	-2.9102
SLC7A6	4	0.0012422	0.0045584	0.808787	100	4	-0.30213	0.99876	0.99881	0.999996	19075	0	-0.30213	-2.90581
ZNF223	4	0.0012528	0.0045951	0.808787	101	2	-0.31963	0.63205	0.66909	0.999996	12681	1	-0.31963	-2.90212
HSFY1	4	0.0012546	0.0046003	0.808787	102	4	-0.2056	0.99875	0.9988	0.999996	19074	0	-0.2056	-2.90149
FAM9B	4	0.0012561	0.0046065	0.808787	103	2	-0.30785	0.97554	0.97568	0.999996	18586	0	-0.30785	-2.90098
PCDHGB2	4	0.0012649	0.0046381	0.808787	104	2	-0.047866	0.46497	0.57868	0.999996	10995	1	-0.047866	-2.89794
PRPS1	4	0.0012712	0.0046599	0.808787	105	4	-0.23963	0.99873	0.99878	0.999996	19073	0	-0.23963	-2.89579
CEACAM16	4	0.0012741	0.0046723	0.808787	106	4	-0.17132	0.99873	0.99878	0.999996	19072	0	-0.17132	-2.8948
GAS1	4	0.0012802	0.0046961	0.808787	107	4	-0.19443	0.99872	0.99877	0.999996	19071	0	-0.19443	-2.89272
DUSP9	4	0.0012884	0.0047262	0.808787	108	4	-0.17875	0.99044	0.99053	0.999996	18908	0	-0.17875	-2.88995
UFSP2	4	0.0013035	0.0047723	0.808787	109	4	-0.28462	0.9987	0.99874	0.999996	19070	0	-0.28462	-2.88489
PSG3	4	0.0013165	0.0048174	0.808787	110	2	-0.012723	0.51942	0.60557	0.999996	11485	1	-0.012723	-2.88058
CECR6	4	0.0013184	0.0048225	0.808787	111	2	-0.16776	0.71705	0.72798	0.999996	13798	1	-0.16776	-2.87995
KRTAP4-4	4	0.0013541	0.0049396	0.808787	112	4	-0.26012	0.9975	0.99757	0.999996	19046	0	-0.26012	-2.86835
NUP37	4	0.0013546	0.0049422	0.808787	113	2	-0.22482	0.29307	0.43016	0.999996	8167	2	-0.22482	-2.86819
EVPLL	4	0.0013615	0.0049671	0.808787	114	2	-0.17816	0.42848	0.56171	0.999996	10689	1	-0.17816	-2.86598
ZNF337	4	0.0013789	0.0050261	0.808787	115	3	-0.31234	0.89456	0.89456	0.999996	16984	0	-0.31234	-2.86047
ANO9	4	0.0013937	0.0050753	0.808787	116	3	-0.21996	0.98248	0.98258	0.999996	18719	0	-0.21996	-2.85583
DHX37	4	0.0014085	0.0051204	0.808787	117	4	-1.4185	0.99859	0.99863	0.999996	19069	0	-1.4185	-2.85124
ANKRD18A	4	0.0014197	0.0051593	0.808787	118	1	-0.054318	0.34752	0.48846	0.999996	9293	1	-0.054318	-2.8478
CNPY3	4	0.0014328	0.0052173	0.808787	119	4	-0.44567	0.98885	0.98892	0.999996	18881	0	-0.44567	-2.84381
UFSP1	4	0.0014403	0.0052473	0.808787	120	2	-0.21066	0.096431	0.20798	0.986532	4023	1	-0.21066	-2.84155
C9orf116	4	0.0014471	0.0052748	0.808787	121	3	-0.31172	0.90942	0.90939	0.999996	17277	0	-0.31172	-2.8395
CENPE	4	0.0014658	0.0053432	0.808787	122	3	-0.42671	0.60399	0.65192	0.999996	12369	1	-0.42671	-2.83393
ATP13A1	4	0.0014713	0.0053597	0.808787	123	3	-0.75477	0.66289	0.68918	0.999996	13061	1	-0.75477	-2.8323
LIPE	4	0.0014758	0.0053753	0.808787	124	3	-0.21967	0.47352	0.58282	0.999996	11067	1	-0.21967	-2.83097
SLC4A2	4	0.0014842	0.0054007	0.808787	125	3	-0.24099	0.98665	0.98673	0.999996	18826	0	-0.24099	-2.82851
LHCGR	4	0.0015103	0.0054949	0.808787	126	4	-0.19778	0.99849	0.99852	0.999996	19068	0	-0.19778	-2.82094
SGCA	4	0.0015105	0.0054949	0.808787	127	3	-0.24853	0.40317	0.54809	0.999996	10416	1	-0.24853	-2.82088
YES1	4	0.0015117	0.0054975	0.808787	128	2	-0.38082	0.95617	0.95622	0.999996	18241	0	-0.38082	-2.82053
ATM	4	0.0015229	0.0055416	0.808787	129	2	-0.18972	0.79798	0.79802	0.999996	15189	1	-0.18972	-2.81733
GPC6	4	0.0015602	0.0056654	0.808787	130	3	-0.35421	0.96487	0.96498	0.999996	18387	0	-0.35421	-2.80682
VWA8	4	0.0015641	0.0056737	0.808787	131	4	-0.24762	0.99844	0.99847	0.999996	19067	0	-0.24762	-2.80574
GABPA	4	0.0015742	0.005711	0.808787	132	4	-0.35117	0.99843	0.99846	0.999996	19066	0	-0.35117	-2.80294
MED15	4	0.0015745	0.005712	0.808787	133	2	-0.043876	0.2651	0.40007	0.999996	7619	1	-0.043876	-2.80286
POLB	4	0.0015774	0.0057234	0.808787	134	3	-0.19773	0.3574	0.49895	0.999996	9504	1	-0.19773	-2.80206
B4GALNT4	4	0.00158	0.0057343	0.808787	135	4	-0.38956	0.99842	0.99846	0.999996	19065	0	-0.38956	-2.80134
FAM26E	4	0.0015857	0.005755	0.808787	136	3	-0.18694	0.98023	0.98036	0.999996	18679	0	-0.18694	-2.79978
CLIC3	4	0.0016261	0.0059031	0.821603	137	2	-0.16148	0.88321	0.88328	0.999996	16779	0	-0.16148	-2.78885
TMEM8B	4	0.0016351	0.0059322	0.821603	138	4	-0.27602	0.99836	0.99841	0.999996	19064	0	-0.27602	-2.78646
SCFD2	4	0.0016776	0.0060844	0.836634	139	1	-0.0016912	0.14428	0.27002	0.993956	5176	1	-0.0016912	-2.77531
ARHGEF28	4	0.0017133	0.0062228	0.845704	140	4	-0.32577	0.99829	0.99834	0.999996	19062	0	-0.32577	-2.76617
KLHL36	4	0.0017292	0.0062782	0.845704	141	2	-0.047678	0.29965	0.43731	0.999996	8303	1	-0.047678	-2.76215
ERV3-1	4	0.0017333	0.0062937	0.845704	142	3	-0.20038	0.78718	0.78754	0.999996	14972	1	-0.20038	-2.76113
ADAT1	4	0.0017437	0.0063274	0.845704	143	2	-0.23726	0.93636	0.93629	0.999996	17851	0	-0.23726	-2.75853
BARX1	4	0.0017808	0.0064631	0.848046	144	1	0.027298	0.24941	0.38311	0.999996	7299	2	0.027298	-2.74938
TMEM198	4	0.0018035	0.0065393	0.848046	145	3	-0.17883	0.93124	0.93118	0.999996	17732	0	-0.17883	-2.74388
RPGR	4	0.0018222	0.0066102	0.848046	146	3	-0.24969	0.96652	0.96663	0.999996	18420	0	-0.24969	-2.7394
AMN1	4	0.0018324	0.0066387	0.848046	147	2	-0.096053	0.22405	0.35592	0.999996	6768	1	-0.096053	-2.73698
NMRK2	4	0.0018449	0.0066812	0.848046	148	4	-0.090985	0.99816	0.9982	0.999996	19060	0	-0.090985	-2.73403
NLRX1	4	0.0018604	0.0067392	0.848046	149	3	-0.3143	0.97081	0.97093	0.999996	18502	0	-0.3143	-2.73039
REXO1	4	0.0018774	0.0067921	0.848046	150	3	-0.25333	0.80759	0.80768	0.999996	15362	0	-0.25333	-2.72644
SMAD5	4	0.0018791	0.0067978	0.848046	151	4	-0.27484	0.99812	0.99817	0.999996	19059	0	-0.27484	-2.72605
FAM171B	4	0.0018804	0.0068009	0.848046	152	2	-0.20372	0.78673	0.78712	0.999996	14964	1	-0.20372	-2.72575
CD74	4	0.001884	0.0068123	0.848046	153	1	0.19658	0.0063638	0.021914	0.941204	439	3	0.19658	-2.72492
ZGLP1	4	0.0018884	0.006833	0.848046	154	2	-0.13741	0.73408	0.74142	0.999996	14062	1	-0.13741	-2.72391
TSR2	4	0.0019039	0.0068946	0.849466	155	4	-0.66498	0.9981	0.99815	0.999996	19058	0	-0.66498	-2.72036
KRTAP4-11	4	0.0019281	0.0069765	0.849466	156	4	-0.20591	0.99807	0.99813	0.999996	19057	0	-0.20591	-2.71487
KANK3	4	0.0019482	0.00705	0.849466	157	3	-0.28027	0.7356	0.74266	0.999996	14086	1	-0.28027	-2.71037
ANGPTL6	4	0.0019648	0.007106	0.849466	158	3	-0.2617	0.85347	0.85356	0.999996	16214	0	-0.2617	-2.70668
C8B	4	0.0019871	0.0071796	0.849466	159	1	0.022348	0.82311	0.82321	0.999996	15629	0	0.022348	-2.70178
DSC2	4	0.0019945	0.0072112	0.849466	160	3	-0.32929	0.23327	0.36586	0.999996	6945	1	-0.32929	-2.70017
TIMM21	4	0.0020387	0.0073673	0.849466	161	2	-0.059745	0.69544	0.71188	0.999996	13511	1	-0.059745	-2.69065
NIPSNAP1	4	0.0020464	0.0073982	0.849466	162	4	-0.3493	0.99795	0.998	0.999996	19056	0	-0.3493	-2.68901
COMMD3	4	0.0020472	0.0074007	0.849466	163	3	-0.51014	0.8181	0.8182	0.999996	15534	0	-0.51014	-2.68884
PCMTD1	4	0.0020571	0.007436	0.849466	164	4	-0.2261	0.99794	0.998	0.999996	19054	0	-0.2261	-2.68674
TTLL10	4	0.0020903	0.0075473	0.849466	165	1	0.0090316	0.34023	0.48063	0.999996	9150	2	0.0090316	-2.67979
MAP2K2	4	0.0020973	0.0075753	0.849466	166	4	-0.2461	0.9979	0.99796	0.999996	19053	0	-0.2461	-2.67834
TAS2R14	4	0.0021233	0.0076613	0.849466	167	4	-0.38392	0.99788	0.99794	0.999996	19052	0	-0.38392	-2.67299
SCN5A	4	0.0021271	0.0076748	0.849466	168	4	-0.26951	0.98872	0.98878	0.999996	18874	0	-0.26951	-2.67221
BMPR2	4	0.0021418	0.0077292	0.849466	169	1	0.022249	0.64842	0.67964	0.999996	12881	1	0.022249	-2.66922
C4orf51	4	0.0021442	0.0077375	0.849466	170	3	-0.28222	0.23149	0.36391	0.999996	6917	1	-0.28222	-2.66873
WDR38	4	0.002167	0.0078095	0.849466	171	4	-0.34127	0.99783	0.9979	0.999996	19051	0	-0.34127	-2.66414
XCL2	4	0.0021756	0.0078364	0.849466	172	4	-0.23168	0.99782	0.99789	0.999996	19050	0	-0.23168	-2.66242
ALDH7A1	4	0.0021826	0.0078628	0.849466	173	3	-0.32813	0.96688	0.96698	0.999996	18428	0	-0.32813	-2.66103
CELA1	4	0.002192	0.0079017	0.849466	174	3	-0.22807	0.97867	0.97883	0.999996	18649	0	-0.22807	-2.65916
C21orf91	4	0.0021934	0.0079053	0.849466	175	2	-0.11486	0.79863	0.79866	0.999996	15199	1	-0.11486	-2.65888
GPR162	4	0.0021948	0.0079074	0.849466	176	2	-0.23187	0.82725	0.82739	0.999996	15708	0	-0.23187	-2.65861
TMEM115	4	0.0022035	0.0079312	0.849466	177	2	-0.14314	0.68471	0.70417	0.999996	13353	1	-0.14314	-2.65689
LRRC7	4	0.0022059	0.0079431	0.849466	178	3	-0.53366	0.52841	0.61016	0.999996	11582	1	-0.53366	-2.65641
KAT2B	4	0.0022093	0.0079556	0.849466	179	2	-0.114	0.59771	0.64818	0.999996	12299	1	-0.114	-2.65575
C2orf40	4	0.002238	0.0080545	0.851676	180	3	-0.20642	0.67131	0.69491	0.999996	13168	1	-0.20642	-2.65014
OR9G1	4	0.002245	0.0080783	0.851676	181	2	-0.080487	0.27306	0.40861	0.999996	7773	1	-0.080487	-2.64878
CNNM1	4	0.0022529	0.0081099	0.851676	182	2	-0.20046	0.73545	0.74253	0.999996	14084	1	-0.20046	-2.64726
FAM98A	4	0.0022686	0.0081602	0.85227	183	4	-0.2932	0.99773	0.99779	0.999996	19049	0	-0.2932	-2.64424
KPRP	4	0.0022965	0.0082596	0.856912	184	3	-0.19398	0.91426	0.91419	0.999996	17381	0	-0.19398	-2.63893
CEP135	4	0.0023162	0.0083337	0.856912	185	2	-0.070073	0.062108	0.1433	0.986532	2767	2	-0.070073	-2.63522
RPS20	4	0.0023236	0.0083648	0.856912	186	3	-1.0295	0.98386	0.98398	0.999996	18758	0	-1.0295	-2.63384
LCE1B	4	0.0023302	0.008384	0.856912	187	4	-0.096281	0.99767	0.99772	0.999996	19048	0	-0.096281	-2.63261
NAT8	4	0.0023598	0.0085036	0.858606	188	4	-0.32061	0.99119	0.99126	0.999996	18924	0	-0.32061	-2.62712
TMPRSS11A	4	0.0023924	0.0086134	0.858606	189	2	-0.18493	0.80204	0.80208	0.999996	15263	1	-0.18493	-2.62117
SH2D1A	4	0.0023997	0.0086404	0.858606	190	3	-0.13959	0.10188	0.21792	0.987119	4213	1	-0.13959	-2.61984
NODAL	4	0.0024377	0.0087782	0.858606	191	4	-0.22774	0.99756	0.99762	0.999996	19047	0	-0.22774	-2.61302
CLCC1	4	0.0024527	0.0088352	0.858606	192	3	-0.37149	0.33698	0.47713	0.999996	9087	1	-0.37149	-2.61036
ACLY	4	0.0024682	0.0088776	0.858606	193	3	-0.61222	0.68286	0.7029	0.999996	13325	1	-0.61222	-2.60762
LCE1E	4	0.0024805	0.0089165	0.858606	194	2	-0.12283	0.75282	0.75686	0.999996	14365	1	-0.12283	-2.60546
UBE2D4	4	0.0024827	0.0089243	0.858606	195	3	-0.21305	0.55224	0.62275	0.999996	11826	1	-0.21305	-2.60508
ECHS1	4	0.0024945	0.008959	0.858606	196	4	-0.25364	0.99726	0.99735	0.999996	19039	0	-0.25364	-2.60302
SHISA5	4	0.0024989	0.008974	0.858606	197	2	-0.12664	0.22199	0.35372	0.999996	6724	2	-0.12664	-2.60225
IER5L	4	0.0025112	0.0090165	0.858606	198	2	-0.09822	0.20921	0.33999	0.999996	6479	2	-0.09822	-2.60012
USP29	4	0.0025143	0.0090268	0.858606	199	3	-0.25335	0.51411	0.60284	0.999996	11434	1	-0.25335	-2.59958
ZC2HC1B	4	0.0025373	0.0090993	0.858606	200	4	-0.15413	0.99746	0.99753	0.999996	19045	0	-0.15413	-2.59563
LUZP1	4	0.0025489	0.0091341	0.858606	201	4	-0.18828	0.99562	0.99572	0.999996	19009	0	-0.18828	-2.59365
ACTG1	4	0.0025543	0.0091501	0.858606	202	2	-0.15128	0.87533	0.87539	0.999996	16617	0	-0.15128	-2.59273
EXD1	4	0.0025595	0.0091636	0.858606	203	4	-0.22632	0.99744	0.99751	0.999996	19044	0	-0.22632	-2.59184
CARKD	4	0.0026059	0.0093252	0.858606	204	2	-0.18402	0.90641	0.90639	0.999996	17219	0	-0.18402	-2.58404
RABGEF1	4	0.0026317	0.009406	0.858606	205	4	-0.20356	0.99737	0.99744	0.999996	19042	0	-0.20356	-2.57976
SLC2A4RG	4	0.0026364	0.0094221	0.858606	206	3	-0.50124	0.93061	0.9305	0.999996	17720	0	-0.50124	-2.57899
P2RX3	4	0.0026574	0.0095003	0.858606	207	3	-0.09573	0.49952	0.59549	0.999996	11293	1	-0.09573	-2.57554
RASEF	4	0.0026633	0.0095143	0.858606	208	4	-0.16566	0.99734	0.99742	0.999996	19041	0	-0.16566	-2.57458
PTCRA	4	0.0026701	0.0095433	0.858606	209	3	-0.16292	0.54465	0.61869	0.999996	11744	1	-0.16292	-2.57347
MSL3	4	0.002674	0.0095542	0.858606	210	4	-0.22669	0.99082	0.99091	0.999996	18916	0	-0.22669	-2.57284
WDR53	4	0.0026995	0.009636	0.858606	211	3	-0.23559	0.97182	0.97194	0.999996	18520	0	-0.23559	-2.56872
PUM1	4	0.0027059	0.0096593	0.858606	212	2	-0.23747	0.50591	0.59866	0.999996	11364	1	-0.23747	-2.56769
KIAA1841	4	0.0027075	0.009664	0.858606	213	4	-0.35107	0.99553	0.99563	0.999996	19006	0	-0.35107	-2.56743
TCTN3	4	0.002709	0.0096676	0.858606	214	3	-0.65231	0.98386	0.98398	0.999996	18747	0	-0.65231	-2.56719
TM7SF2	4	0.0027133	0.0096837	0.858606	215	4	-0.51732	0.99729	0.99737	0.999996	19040	0	-0.51732	-2.5665
RAD17	4	0.0027401	0.0097645	0.858606	216	3	-0.3661	0.73983	0.74609	0.999996	14151	1	-0.3661	-2.56223
TOMM70A	4	0.0027411	0.0097666	0.858606	217	2	-0.3391	0.14363	0.2693	0.993956	5165	1	-0.3391	-2.56208
LZTS2	4	0.0027476	0.0097935	0.858606	218	2	-0.11205	0.77931	0.78022	0.999996	14832	1	-0.11205	-2.56105
NMNAT1	4	0.0027605	0.0098381	0.858606	219	3	-0.30943	0.98428	0.9844	0.999996	18767	0	-0.30943	-2.55901
SERP2	4	0.0027961	0.0099691	0.865868	220	3	-0.33837	0.013643	0.043611	0.955604	867	1	-0.33837	-2.55345
LAMA3	4	0.0028121	0.010032	0.865868	221	2	-0.12741	0.94082	0.94081	0.999996	17929	0	-0.12741	-2.55097
FAM46C	4	0.0028183	0.010057	0.865868	222	3	-0.2864	0.67194	0.69534	0.999996	13175	1	-0.2864	-2.55001
GRB10	4	0.0028491	0.010172	0.870617	223	4	-0.16135	0.99715	0.99724	0.999996	19038	0	-0.16135	-2.54529
PYGO2	4	0.0028839	0.010302	0.870617	224	4	-0.20311	0.99712	0.99721	0.999996	19037	0	-0.20311	-2.54002
PLA2G12B	4	0.0028862	0.010306	0.870617	225	4	-0.27247	0.99711	0.9972	0.999996	19036	0	-0.27247	-2.53967
QSOX2	4	0.002902	0.010354	0.870617	226	4	-0.15889	0.9971	0.99719	0.999996	19035	0	-0.15889	-2.5373
UBE2E1	4	0.0029152	0.010396	0.870617	227	2	-0.013936	0.25604	0.39022	0.999996	7443	1	-0.013936	-2.53533
ALKBH8	4	0.0029211	0.010418	0.870617	228	4	-0.22781	0.99708	0.99717	0.999996	19034	0	-0.22781	-2.53445
FAM188B	4	0.0029248	0.010431	0.870617	229	3	-0.30358	0.23353	0.36612	0.999996	6949	1	-0.30358	-2.5339
PLCE1	4	0.0029507	0.010525	0.874623	230	3	-0.54894	0.81079	0.81089	0.999996	15414	0	-0.54894	-2.53007
RAD51D	4	0.0029667	0.010587	0.875311	231	3	-0.41817	0.68731	0.70597	0.999996	13389	1	-0.41817	-2.52773
SCAF4	4	0.0029878	0.010651	0.875311	232	4	-0.15671	0.99701	0.9971	0.999996	19033	0	-0.15671	-2.52465
AASS	4	0.0030163	0.010755	0.875311	233	4	-0.18601	0.99698	0.99707	0.999996	19032	0	-0.18601	-2.52053
LYRM1	4	0.0030178	0.010759	0.875311	234	3	-0.14033	0.74279	0.74851	0.999996	14207	1	-0.14033	-2.52031
KIAA1045	4	0.0030182	0.010762	0.875311	235	2	-0.06135	0.34856	0.48952	0.999996	9315	2	-0.06135	-2.52025
PDGFC	4	0.0030516	0.010885	0.876838	236	4	-0.27063	0.99592	0.99602	0.999996	19013	0	-0.27063	-2.51547
CYP2C9	4	0.0030698	0.010946	0.876838	237	1	-0.018031	0.77468	0.77592	0.999996	14745	1	-0.018031	-2.51289
SPACA4	4	0.0030712	0.010952	0.876838	238	4	-0.18511	0.99693	0.99701	0.999996	19031	0	-0.18511	-2.51269
CHCHD4	4	0.0030753	0.010964	0.876838	239	2	-0.39045	0.93677	0.93672	0.999996	17859	0	-0.39045	-2.51211
C14orf169	4	0.0031031	0.011059	0.879805	240	3	-0.24414	0.92662	0.92656	0.999996	17647	0	-0.24414	-2.5082
C21orf58	4	0.0031213	0.01113	0.879805	241	2	-0.062805	0.081866	0.18117	0.986532	3501	2	-0.062805	-2.50566
MAP3K3	4	0.0031419	0.011197	0.879805	242	4	-0.29336	0.99686	0.99694	0.999996	19030	0	-0.29336	-2.50281
H1FNT	4	0.0031594	0.01126	0.879805	243	3	-0.23954	0.96786	0.96796	0.999996	18449	0	-0.23954	-2.5004
FUZ	4	0.0031728	0.011313	0.879805	244	2	-0.15561	0.94425	0.94429	0.999996	18000	0	-0.15561	-2.49856
PTH1R	4	0.0031782	0.011335	0.879805	245	2	-0.15961	0.765	0.76722	0.999996	14559	1	-0.15961	-2.49782
WNT4	4	0.0031839	0.011358	0.879805	246	4	-0.11892	0.99682	0.9969	0.999996	19029	0	-0.11892	-2.49704
SAP25	4	0.0031872	0.01137	0.879805	247	4	-0.28383	0.99028	0.99037	0.999996	18903	0	-0.28383	-2.49659
ATP6V0E1	4	0.0032138	0.011467	0.880119	248	4	-0.24315	0.99679	0.99688	0.999996	19028	0	-0.24315	-2.49298
SCGB2A1	4	0.0032244	0.011502	0.880119	249	3	-0.1266	0.81896	0.81906	0.999996	15554	0	-0.1266	-2.49155
CFLAR	4	0.0032271	0.011513	0.880119	250	4	-0.98704	0.99677	0.99687	0.999996	19027	0	-0.98704	-2.49119
RNF214	4	0.0032759	0.011679	0.880119	251	2	-0.18009	0.93842	0.93839	0.999996	17890	0	-0.18009	-2.48467
OGFOD1	4	0.0032855	0.01171	0.880119	252	4	-0.22751	0.99671	0.99681	0.999996	19025	0	-0.22751	-2.4834
CD34	4	0.0032908	0.011731	0.880119	253	4	-0.22408	0.99671	0.9968	0.999996	19024	0	-0.22408	-2.4827
TTLL9	4	0.0033143	0.011822	0.880119	254	2	-0.15108	0.82009	0.82018	0.999996	15571	0	-0.15108	-2.47961
C19orf33	4	0.0033219	0.011845	0.880119	255	3	-0.3011	0.96979	0.96989	0.999996	18472	0	-0.3011	-2.47861
ITFG2	4	0.0033274	0.011865	0.880119	256	2	-0.13742	0.92864	0.92858	0.999996	17683	0	-0.13742	-2.47789
RD3	4	0.0033567	0.011968	0.880119	257	3	-0.22006	0.8168	0.81687	0.999996	15515	0	-0.22006	-2.47409
JOSD2	4	0.0033616	0.01199	0.880119	258	4	-0.1765	0.99664	0.99675	0.999996	19023	0	-0.1765	-2.47345
MBD3L1	4	0.0033789	0.012053	0.880119	259	3	-0.26583	0.75101	0.75535	0.999996	14327	1	-0.26583	-2.47122
TXNDC12	4	0.0033997	0.012117	0.880119	260	4	-0.23468	0.9966	0.99671	0.999996	19022	0	-0.23468	-2.46856
SERPINA10	4	0.0034066	0.012135	0.880119	261	3	-0.25339	0.80838	0.80847	0.999996	15373	0	-0.25339	-2.46768
MSMB	4	0.0034102	0.012145	0.880119	262	2	-0.18643	0.81909	0.81917	0.999996	15556	0	-0.18643	-2.46722
HDAC9	4	0.0034137	0.012157	0.880119	263	2	-0.24824	0.58752	0.64232	0.999996	12178	1	-0.24824	-2.46677
CACNA1D	4	0.0034138	0.012157	0.880119	264	3	-0.23205	0.94456	0.94459	0.999996	18005	0	-0.23205	-2.46676
ACE	4	0.0034281	0.012216	0.881095	265	3	-0.26684	0.79816	0.79819	0.999996	15192	1	-0.26684	-2.46495
KRT7	4	0.003482	0.012413	0.890184	266	2	-0.14418	0.21541	0.34669	0.999996	6600	2	-0.14418	-2.45817
KRT12	4	0.0034893	0.012438	0.890184	267	2	-0.20264	0.91393	0.91386	0.999996	17369	0	-0.20264	-2.45726
PRPF3	4	0.0035019	0.012482	0.890184	268	4	-0.28419	0.9965	0.9966	0.999996	19021	0	-0.28419	-2.4557
BLVRB	4	0.0035335	0.012577	0.890413	269	1	-0.071373	0.69804	0.71379	0.999996	13548	1	-0.071373	-2.45179
ABHD8	4	0.0035473	0.012612	0.890413	270	3	-0.26264	0.96262	0.96272	0.999996	18355	0	-0.26264	-2.4501
C11orf98	4	0.003551	0.012625	0.890413	271	2	-0.17646	0.93651	0.93646	0.999996	17852	0	-0.17646	-2.44965
OR2L2	4	0.003585	0.012733	0.894625	272	1	-0.01271	0.56248	0.6283	0.999996	11924	1	-0.01271	-2.44551
CPNE9	4	0.0035973	0.012778	0.894625	273	4	-0.22954	0.9964	0.99651	0.999996	19020	0	-0.22954	-2.44402
CEP83	4	0.0036365	0.012918	0.901117	274	2	-0.12031	0.38099	0.52419	0.999996	9977	2	-0.12031	-2.43932
COX8C	4	0.0036658	0.013008	0.904104	275	3	-0.1527	0.88821	0.88823	0.999996	16853	0	-0.1527	-2.43583
MAGEA2	4	0.003688	0.01308	0.904976	276	3	-0.16249	0.98653	0.98661	0.999996	18824	0	-0.16249	-2.43321
MSTO1	4	0.0036982	0.013116	0.904976	277	2	-0.24671	0.65964	0.68704	0.999996	13019	1	-0.24671	-2.43201
PRDX3	4	0.0037202	0.013189	0.906347	278	4	-0.18539	0.99628	0.99638	0.999996	19019	0	-0.18539	-2.42943
BARD1	4	0.0037395	0.013258	0.906347	279	3	-0.34798	0.96977	0.96987	0.999996	18471	0	-0.34798	-2.42719
ARHGEF17	4	0.003746	0.013278	0.906347	280	4	-0.41757	0.99625	0.99636	0.999996	19018	0	-0.41757	-2.42643
C1QTNF8	4	0.0037671	0.013354	0.908337	281	4	-0.13304	0.99623	0.99634	0.999996	19017	0	-0.13304	-2.42399
SPRY2	4	0.003791	0.013434	0.909229	282	2	-0.0864	0.079753	0.17724	0.986532	3417	1	-0.0864	-2.42125
HTR3B	4	0.0037993	0.013463	0.909229	283	2	-0.13965	0.050338	0.12012	0.982021	2330	2	-0.13965	-2.4203
EPPK1	4	0.0038248	0.01355	0.911885	284	4	-0.23872	0.99618	0.99628	0.999996	19016	0	-0.23872	-2.41739
C2orf49	4	0.0038425	0.013611	0.912501	285	1	0.1335	0.10744	0.22787	0.987147	4411	3	0.1335	-2.41539
PLEKHG4B	4	0.0038568	0.013654	0.912501	286	4	-0.31503	0.99267	0.99275	0.999996	18946	0	-0.31503	-2.41377
PREX1	4	0.003894	0.013785	0.914266	287	2	-0.162	0.69852	0.71414	0.999996	13558	1	-0.162	-2.4096
KCNJ8	4	0.003894	0.013785	0.914266	288	3	-0.1554	0.85362	0.85373	0.999996	16218	0	-0.1554	-2.4096
NR4A2	4	0.0039035	0.013824	0.914266	289	3	-0.17057	0.23834	0.37123	0.999996	7054	1	-0.17057	-2.40855
HELQ	4	0.0039717	0.014055	0.921368	290	3	-0.36667	0.94356	0.94361	0.999996	17984	0	-0.36667	-2.40102
OR10J3	4	0.003997	0.014141	0.921368	291	2	-0.0042278	0.36213	0.50396	0.999996	9593	2	-0.0042278	-2.39827
SPIN2A	4	0.0040273	0.014242	0.921368	292	4	-0.14018	0.99597	0.99608	0.999996	19015	0	-0.14018	-2.39499
FBXL2	4	0.0040314	0.014256	0.921368	293	4	-0.16688	0.99597	0.99608	0.999996	19014	0	-0.16688	-2.39454
FOLH1	4	0.0040362	0.014266	0.921368	294	2	-0.36089	0.6647	0.69041	0.999996	13081	1	-0.36089	-2.39403
GFI1	4	0.0040485	0.014308	0.921368	295	2	-0.13989	0.96925	0.96933	0.999996	18465	0	-0.13989	-2.39271
COMMD4	4	0.0040634	0.01435	0.921368	296	3	-0.29187	0.97988	0.98	0.999996	18674	0	-0.29187	-2.39111
TMEM38A	4	0.0040689	0.014365	0.921368	297	3	-0.21267	0.53155	0.6118	0.999996	11610	1	-0.21267	-2.39052
TRNT1	4	0.0040829	0.014413	0.921368	298	2	-0.3751	0.94187	0.94187	0.999996	17948	0	-0.3751	-2.38903
CLEC4C	4	0.0041	0.014462	0.921368	299	1	0.079622	0.059201	0.13761	0.986532	2657	2	0.079622	-2.38722
IDH3G	4	0.0041038	0.014479	0.921368	300	4	-0.15885	0.9959	0.996	0.999996	19012	0	-0.15885	-2.38681
SPINK2	4	0.0041135	0.01451	0.921368	301	3	-0.27367	0.86847	0.86855	0.999996	16481	0	-0.27367	-2.38579
PLSCR4	4	0.0041515	0.01464	0.926513	302	3	-0.11759	0.21262	0.34368	0.999996	6553	1	-0.11759	-2.38179
C6orf203	4	0.004203	0.014804	0.933846	303	1	0.073997	0.06201	0.14311	0.986532	2764	2	0.073997	-2.37644
BAIAP2L1	4	0.0042403	0.01491	0.934786	304	2	-0.16583	0.67668	0.69857	0.999996	13226	1	-0.16583	-2.3726
NINJ2	4	0.0042506	0.014951	0.934786	305	4	-0.23071	0.99575	0.99585	0.999996	19011	0	-0.23071	-2.37155
CREB5	4	0.0042545	0.014966	0.934786	306	2	-0.03395	0.38501	0.5285	0.999996	10064	1	-0.03395	-2.37115
LIMS2	4	0.004283	0.015062	0.935772	307	3	-0.40873	0.73741	0.74411	0.999996	14113	1	-0.40873	-2.36825
C3orf30	4	0.0043001	0.015118	0.935772	308	2	-0.12278	0.76071	0.76353	0.999996	14496	1	-0.12278	-2.36652
C9orf40	4	0.0043041	0.015129	0.935772	309	2	-0.11544	0.77295	0.77437	0.999996	14706	1	-0.11544	-2.36612
KDELC1	4	0.0043482	0.015275	0.937383	310	2	-0.17818	0.6597	0.68708	0.999996	13020	1	-0.17818	-2.36169
LMO2	4	0.0043575	0.015311	0.937383	311	2	-0.074795	0.79431	0.79437	0.999996	15118	1	-0.074795	-2.36076
RPL37A	4	0.0043591	0.015316	0.937383	312	4	-0.51011	0.99564	0.99574	0.999996	19010	0	-0.51011	-2.3606
HAX1	4	0.004389	0.015401	0.937383	313	4	-0.17203	0.99561	0.9957	0.999996	19008	0	-0.17203	-2.35763
KDM2A	4	0.0044066	0.015454	0.937383	314	2	-0.17571	0.60148	0.65041	0.999996	12339	1	-0.17571	-2.3559
SLC44A3	4	0.004409	0.015462	0.937383	315	3	-0.32768	0.31762	0.4565	0.999996	8670	1	-0.32768	-2.35566
DPH1	4	0.0044208	0.015498	0.937383	316	4	-0.37377	0.99558	0.99568	0.999996	19007	0	-0.37377	-2.3545
PGF	4	0.0044604	0.015637	0.942796	317	2	-0.06409	0.49704	0.59424	0.999996	11272	1	-0.06409	-2.35063
FRRS1L	4	0.0044981	0.015774	0.948082	318	3	-0.21235	0.98009	0.98022	0.999996	18677	0	-0.21235	-2.34697
SMIM14	4	0.0045119	0.015824	0.948121	319	1	0.15309	0.07984	0.17739	0.986532	3421	3	0.15309	-2.34564
CTHRC1	4	0.0045289	0.015882	0.948351	320	4	-0.14171	0.99547	0.99558	0.999996	19005	0	-0.14171	-2.34401
NAIF1	4	0.0045432	0.015927	0.948351	321	3	-0.28385	0.71378	0.72547	0.999996	13758	1	-0.28385	-2.34264
CAMSAP3	4	0.0045634	0.015998	0.949619	322	2	-0.23869	0.38494	0.52843	0.999996	10063	1	-0.23869	-2.34071
CARD6	4	0.0046149	0.016189	0.955354	323	1	-0.061168	0.38451	0.52795	0.999996	10054	1	-0.061168	-2.33584
FXN	4	0.0046281	0.016225	0.955354	324	3	-0.45018	0.62932	0.66736	0.999996	12649	1	-0.45018	-2.3346
CHMP5	4	0.0046339	0.016245	0.955354	325	3	-0.39007	0.86214	0.86229	0.999996	16363	0	-0.39007	-2.33405
ACAT2	4	0.0046663	0.016342	0.956808	326	3	-0.22188	0.93393	0.93388	0.999996	17798	0	-0.22188	-2.33103
LARP1	4	0.0047004	0.016458	0.956808	327	4	-0.28194	0.9953	0.99541	0.999996	19004	0	-0.28194	-2.32787
WDR45	4	0.0047143	0.016509	0.956808	328	4	-0.18285	0.99529	0.9954	0.999996	19003	0	-0.18285	-2.32658
TMPRSS13	4	0.0047178	0.01652	0.956808	329	1	0.1284	0.0049754	0.017356	0.941204	334	3	0.1284	-2.32626
GALNT5	4	0.0047328	0.016581	0.956808	330	4	-0.20944	0.99333	0.99342	0.999996	18963	0	-0.20944	-2.32488
STATH	4	0.0047422	0.016614	0.956808	331	2	-0.17298	0.28138	0.41755	0.999996	7938	2	-0.17298	-2.32402
PGRMC1	4	0.0047693	0.016701	0.956808	332	1	0.029532	0.33228	0.47214	0.999996	8997	2	0.029532	-2.32155
ZNF429	4	0.0047884	0.016753	0.956808	333	2	-0.16362	0.76842	0.77033	0.999996	14622	1	-0.16362	-2.31981
OR52N5	4	0.0047952	0.016777	0.956808	334	3	-0.19338	0.022458	0.062789	0.97304	1229	1	-0.19338	-2.31919
NTSR1	4	0.0048055	0.016807	0.956808	335	4	-0.14807	0.99519	0.9953	0.999996	19002	0	-0.14807	-2.31826
SLC39A10	4	0.0048207	0.016855	0.956808	336	1	-0.066515	0.53632	0.61426	0.999996	11657	1	-0.066515	-2.31689
RPP25	4	0.0048722	0.017027	0.956808	337	2	-0.056412	0.34175	0.48225	0.999996	9186	2	-0.056412	-2.31227
P2RY14	4	0.0048785	0.017046	0.956808	338	4	-0.32753	0.99512	0.99522	0.999996	19001	0	-0.32753	-2.31171
SSPN	4	0.0048815	0.017057	0.956808	339	3	-0.40658	0.98386	0.98398	0.999996	18756	0	-0.40658	-2.31145
POMC	4	0.0049155	0.01716	0.956808	340	3	-0.16058	0.73481	0.74199	0.999996	14074	1	-0.16058	-2.30843
MAP3K11	4	0.0049654	0.017327	0.956808	341	4	-0.2669	0.99503	0.99512	0.999996	19000	0	-0.2669	-2.30405
BSDC1	4	0.0049751	0.017354	0.956808	342	1	0.0019801	0.34538	0.48615	0.999996	9247	1	0.0019801	-2.3032
KBTBD13	4	0.0050011	0.017442	0.956808	343	3	-0.26976	0.94107	0.94106	0.999996	17935	0	-0.26976	-2.30093
DPH5	4	0.0050059	0.017458	0.956808	344	3	-0.44367	0.025577	0.069453	0.980459	1350	1	-0.44367	-2.30052
LGALS7	4	0.0050254	0.017514	0.956808	345	3	-0.36006	0.15357	0.28005	0.993956	5368	1	-0.36006	-2.29883
NMU	4	0.00505	0.017599	0.956808	346	4	-0.18645	0.99495	0.99503	0.999996	18999	0	-0.18645	-2.29671
PTPN20	4	0.0050535	0.017613	0.956808	347	3	-0.49024	0.94973	0.94979	0.999996	18120	0	-0.49024	-2.29641
LOC100505841	4	0.0050637	0.017649	0.956808	348	3	-0.3159	0.24568	0.37911	0.999996	7219	1	-0.3159	-2.29553
KCNN2	4	0.005078	0.017702	0.956808	349	2	-0.034539	0.63406	0.6704	0.999996	12699	1	-0.034539	-2.29431
LRRC24	4	0.0050817	0.017714	0.956808	350	3	-0.19715	0.93374	0.93369	0.999996	17794	0	-0.19715	-2.29399
MAGEB5	4	0.0050853	0.017726	0.956808	351	4	-0.17353	0.99491	0.995	0.999996	18998	0	-0.17353	-2.29368
ENOX2	4	0.0050961	0.017758	0.956808	352	2	-0.12352	0.83321	0.83336	0.999996	15833	0	-0.12352	-2.29276
LRRC41	4	0.0051254	0.017856	0.956808	353	3	-0.34667	0.93475	0.93468	0.999996	17818	0	-0.34667	-2.29027
VTA1	4	0.0051295	0.017868	0.956808	354	3	-0.35141	0.98257	0.98267	0.999996	18721	0	-0.35141	-2.28992
FAM83A	4	0.0051527	0.017952	0.956808	355	2	-0.21914	0.19852	0.32858	0.999996	6263	1	-0.21914	-2.28797
PLGLB1	4	0.005181	0.018053	0.956808	356	2	-0.084143	0.1668	0.29435	0.998152	5637	1	-0.084143	-2.28559
LEPR	4	0.0051849	0.018065	0.956808	357	4	-0.21611	0.99482	0.99489	0.999996	18997	0	-0.21611	-2.28526
FGF14	4	0.0052051	0.018131	0.956808	358	2	-0.14282	0.33124	0.47104	0.999996	8967	2	-0.14282	-2.28357
RXRB	4	0.0052224	0.018183	0.956808	359	3	-0.35852	0.75308	0.75708	0.999996	14369	1	-0.35852	-2.28213
STMN2	4	0.0052324	0.018219	0.956808	360	2	-0.0043095	0.26482	0.39974	0.999996	7616	2	-0.0043095	-2.2813
CPSF7	4	0.005236	0.018232	0.956808	361	4	-0.47794	0.99476	0.99485	0.999996	18996	0	-0.47794	-2.281
C19orf44	4	0.0052632	0.01832	0.956808	362	4	-0.25163	0.99474	0.99482	0.999996	18995	0	-0.25163	-2.27875
RNF8	4	0.0052662	0.018332	0.956808	363	4	-0.68237	0.99473	0.99481	0.999996	18994	0	-0.68237	-2.2785
CCL13	4	0.0052839	0.018396	0.956808	364	1	0.10245	0.15542	0.28208	0.993956	5410	2	0.10245	-2.27705
CPEB4	4	0.0053285	0.018532	0.956808	365	3	-0.21505	0.56496	0.62967	0.999996	11948	1	-0.21505	-2.2734
OSBPL10	4	0.0053311	0.018542	0.956808	366	3	-0.13386	0.45587	0.57433	0.999996	10920	1	-0.13386	-2.27318
JMJD1C	4	0.0053628	0.018641	0.956808	367	4	-0.38792	0.99464	0.99471	0.999996	18992	0	-0.38792	-2.27061
OSBPL2	4	0.0053669	0.018656	0.956808	368	4	-0.29072	0.99463	0.99471	0.999996	18991	0	-0.29072	-2.27028
PPP1R3D	4	0.0053684	0.018663	0.956808	369	2	-0.20849	0.98512	0.98521	0.999996	18792	0	-0.20849	-2.27016
TRIM67	4	0.0053867	0.01872	0.956808	370	2	-0.22759	0.11251	0.23571	0.98913	4553	2	-0.22759	-2.26868
PLEKHG7	4	0.00541	0.018797	0.956808	371	4	-0.22094	0.99459	0.99466	0.999996	18990	0	-0.22094	-2.2668
HMCN1	4	0.0054121	0.018806	0.956808	372	4	-0.22512	0.99459	0.99466	0.999996	18989	0	-0.22512	-2.26663
FCGRT	4	0.0054288	0.018861	0.956808	373	3	-0.28335	0.51254	0.60206	0.999996	11419	1	-0.28335	-2.2653
HIST1H2BG	4	0.0054382	0.018891	0.956808	374	2	-0.050335	0.53754	0.61491	0.999996	11670	1	-0.050335	-2.26454
SLC12A7	4	0.0054745	0.019018	0.956808	375	3	-0.29444	0.98513	0.98522	0.999996	18793	0	-0.29444	-2.26166
SCIN	4	0.0054896	0.019073	0.956808	376	2	-0.058619	0.94047	0.94045	0.999996	17923	0	-0.058619	-2.26046
DENND4A	4	0.0054981	0.019102	0.956808	377	3	-0.23697	0.76484	0.76709	0.999996	14555	1	-0.23697	-2.25979
KRTAP5-10	4	0.0055096	0.019145	0.956808	378	3	-0.2033	0.86826	0.86834	0.999996	16477	0	-0.2033	-2.25888
GRHPR	4	0.0055143	0.019156	0.956808	379	4	-0.24722	0.99449	0.99456	0.999996	18987	0	-0.24722	-2.25851
AKAP9	4	0.0055326	0.019211	0.956808	380	4	-0.4777	0.99447	0.99454	0.999996	18986	0	-0.4777	-2.25707
DNAJC25-GNG10	4	0.0055536	0.019273	0.956808	381	4	-0.16517	0.99445	0.99452	0.999996	18985	0	-0.16517	-2.25543
KBTBD11	4	0.0055668	0.019316	0.956808	382	1	0.057136	0.22686	0.35892	0.999996	6830	2	0.057136	-2.25439
ELFN1	4	0.0055668	0.019316	0.956808	383	2	-0.18521	0.61921	0.66119	0.999996	12536	1	-0.18521	-2.25439
C22orf46	4	0.0055689	0.019324	0.956808	384	4	-0.27672	0.99443	0.9945	0.999996	18984	0	-0.27672	-2.25423
PCDHGB5	4	0.0055839	0.019369	0.956808	385	3	-0.25444	0.95413	0.95421	0.999996	18209	0	-0.25444	-2.25306
SEPTIN4	4	0.0055975	0.019416	0.956808	386	2	-0.14591	0.19613	0.32602	0.999996	6218	1	-0.14591	-2.25201
ASTE1	4	0.0056202	0.019502	0.956808	387	3	-0.39581	0.75759	0.76088	0.999996	14444	1	-0.39581	-2.25025
SLC16A2	4	0.0056371	0.01956	0.956808	388	4	-0.12269	0.99436	0.99444	0.999996	18983	0	-0.12269	-2.24894
NKIRAS1	4	0.0056419	0.019569	0.956808	389	4	-0.29072	0.99436	0.99444	0.999996	18982	0	-0.29072	-2.24857
NUP62	4	0.0056439	0.019577	0.956808	390	2	-0.052443	0.12062	0.24437	0.992603	4703	2	-0.052443	-2.24842
TCEAL1	4	0.0056627	0.019639	0.956808	391	4	-0.18397	0.99434	0.99442	0.999996	18981	0	-0.18397	-2.24698
BCL2L14	4	0.0056863	0.019734	0.956808	392	4	-0.21702	0.99428	0.99437	0.999996	18978	0	-0.21702	-2.24517
LHX4	4	0.0056883	0.019745	0.956808	393	4	-0.28891	0.99431	0.99439	0.999996	18980	0	-0.28891	-2.24502
OR4N4	4	0.0056954	0.01977	0.956808	394	1	0.099686	0.17793	0.30635	0.998747	5858	2	0.099686	-2.24448
TMEM167B	4	0.0056977	0.019776	0.956808	395	2	-0.11428	0.72114	0.73116	0.999996	13863	1	-0.11428	-2.2443
RASA2	4	0.0057129	0.019824	0.956808	396	4	-0.11764	0.99429	0.99437	0.999996	18979	0	-0.11764	-2.24314
KCNT1	4	0.0057298	0.019874	0.956817	397	3	-0.21544	0.98758	0.98764	0.999996	18847	0	-0.21544	-2.24186
TMEM126B	4	0.0057468	0.019933	0.957158	398	2	-0.17088	0.34647	0.48734	0.999996	9270	1	-0.17088	-2.24057
CBX1	4	0.0057636	0.019981	0.957158	399	4	-0.26438	0.99424	0.99432	0.999996	18977	0	-0.26438	-2.23931
ARHGEF3	4	0.0057884	0.020073	0.958087	400	4	-0.33832	0.99421	0.9943	0.999996	18976	0	-0.33832	-2.23744
RAD51AP1	4	0.0057982	0.020101	0.958087	401	3	-0.25737	0.57537	0.6355	0.999996	12062	1	-0.25737	-2.23671
ZNF573	4	0.0058404	0.020246	0.960732	402	3	-0.19994	0.88879	0.88881	0.999996	16866	0	-0.19994	-2.23356
RBBP8	4	0.0058497	0.020279	0.960732	403	1	-0.13839	0.74809	0.75291	0.999996	14285	1	-0.13839	-2.23287
KRTAP6-1	4	0.0059011	0.020447	0.960732	404	1	-0.030971	0.21064	0.34153	0.999996	6507	1	-0.030971	-2.22907
HIST1H3E	4	0.0059163	0.020505	0.960732	405	4	-0.26019	0.99408	0.99417	0.999996	18975	0	-0.26019	-2.22795
C9orf89	4	0.0059351	0.020575	0.960732	406	4	-0.19336	0.99406	0.99415	0.999996	18974	0	-0.19336	-2.22657
HM13	4	0.0059525	0.020623	0.960732	407	1	-0.036443	0.30079	0.43856	0.999996	8324	1	-0.036443	-2.2253
RGS22	4	0.0059567	0.020635	0.960732	408	3	-0.20014	0.60902	0.65492	0.999996	12427	1	-0.20014	-2.22499
LDLRAD2	4	0.0059661	0.020657	0.960732	409	2	-0.21087	0.85762	0.85779	0.999996	16280	0	-0.21087	-2.22431
KRT17	4	0.0059914	0.020746	0.960732	410	3	-0.26235	0.83645	0.83659	0.999996	15900	0	-0.26235	-2.22247
DUS2	4	0.005996	0.020764	0.960732	411	4	-0.19791	0.994	0.99409	0.999996	18973	0	-0.19791	-2.22214
SLC17A7	4	0.0060035	0.020786	0.960732	412	2	-0.016975	0.15626	0.283	0.993956	5430	2	-0.016975	-2.2216
CDNF	4	0.0060039	0.020787	0.960732	413	2	-0.12584	0.77478	0.77601	0.999996	14747	1	-0.12584	-2.22157
EPN2	4	0.0060439	0.020918	0.960732	414	3	-0.17804	0.77017	0.77185	0.999996	14660	1	-0.17804	-2.21868
RIPK4	4	0.0060553	0.020956	0.960732	415	2	-0.0601	0.41262	0.55457	0.999996	10540	1	-0.0601	-2.21786
HEXIM1	4	0.0060625	0.020982	0.960732	416	4	-0.33024	0.99394	0.99402	0.999996	18972	0	-0.33024	-2.21735
ACOT12	4	0.006071	0.021015	0.960732	417	4	-0.26322	0.99393	0.99401	0.999996	18971	0	-0.26322	-2.21674
TAS2R20	4	0.0061068	0.021124	0.960732	418	2	-0.062097	0.17733	0.3057	0.998747	5842	2	-0.062097	-2.21419
TRAF4	4	0.0061228	0.021171	0.960732	419	4	-0.16616	0.99388	0.99395	0.999996	18970	0	-0.16616	-2.21305
MED14OS	4	0.0061308	0.021201	0.960732	420	3	-0.21672	0.97834	0.97847	0.999996	18643	0	-0.21672	-2.21248
FKBP5	4	0.0061403	0.021233	0.960732	421	3	-0.33185	0.97339	0.97352	0.999996	18553	0	-0.33185	-2.21181
GEMIN7	4	0.00615	0.021257	0.960732	422	4	-0.27747	0.99385	0.99392	0.999996	18969	0	-0.27747	-2.21112
SMPDL3A	4	0.0061582	0.021279	0.960732	423	2	-0.085985	0.89367	0.89366	0.999996	16966	0	-0.085985	-2.21055
KLHL5	4	0.0061926	0.021378	0.960732	424	2	-0.16507	0.70267	0.7172	0.999996	13614	1	-0.16507	-2.20813
MST1	4	0.0062	0.021401	0.960732	425	4	-0.31396	0.9938	0.99387	0.999996	18968	0	-0.31396	-2.20761
HDAC4	4	0.0062096	0.021425	0.960732	426	2	-0.082286	0.2462	0.37968	0.999996	7233	1	-0.082286	-2.20694
TP63	4	0.0062206	0.021464	0.960732	427	3	-0.19572	0.70099	0.71597	0.999996	13597	1	-0.19572	-2.20617
NUDCD1	4	0.006261	0.021574	0.963415	428	1	0.18779	0.048438	0.11635	0.982021	2239	3	0.18779	-2.20336
SPATA22	4	0.0062822	0.02165	0.964539	429	3	-0.78709	0.11651	0.23997	0.991111	4624	1	-0.78709	-2.20189
RAD51AP2	4	0.0063124	0.021746	0.966601	430	2	-0.13508	0.18347	0.3124	0.999496	5969	2	-0.13508	-2.19981
TJP2	4	0.0063638	0.021914	0.971779	431	3	-0.12855	0.98717	0.98724	0.999996	18841	0	-0.12855	-2.19628
DHRSX	4	0.0063844	0.021987	0.972761	432	2	-0.24337	0.43481	0.56455	0.999996	10731	1	-0.24337	-2.19488
ARL6IP6	4	0.0064152	0.022088	0.974973	433	3	-0.43199	0.96492	0.96504	0.999996	18388	0	-0.43199	-2.19279
USH1G	4	0.0064467	0.022193	0.975872	434	4	-0.13288	0.99355	0.99364	0.999996	18967	0	-0.13288	-2.19066
STAR	4	0.0064666	0.022253	0.975872	435	2	-0.14818	0.10416	0.22194	0.987119	4289	1	-0.14818	-2.18932
PCCA	4	0.0065115	0.022397	0.975872	436	3	-0.23215	0.89832	0.89833	0.999996	17052	0	-0.23215	-2.18632
GPR25	4	0.006518	0.022423	0.975872	437	3	-0.098984	0.90377	0.90376	0.999996	17157	0	-0.098984	-2.18589
RIOK3	4	0.0065301	0.022466	0.975872	438	2	-0.13927	0.29106	0.42798	0.999996	8124	2	-0.13927	-2.18508
GTPBP8	4	0.0065366	0.022485	0.975872	439	3	-0.35938	0.77767	0.77868	0.999996	14804	1	-0.35938	-2.18465
PGLYRP4	4	0.0065406	0.0225	0.975872	440	3	-0.38436	0.73812	0.74471	0.999996	14123	1	-0.38436	-2.18438
PILRA	4	0.006571	0.022596	0.975872	441	4	-0.1777	0.99343	0.99352	0.999996	18966	0	-0.1777	-2.18237
WDR45B	4	0.0065734	0.022604	0.975872	442	4	-0.17526	0.99343	0.99351	0.999996	18965	0	-0.17526	-2.18221
DCUN1D3	4	0.0066035	0.022708	0.975872	443	4	-0.19275	0.98912	0.98921	0.999996	18885	0	-0.19275	-2.18023
PHF12	4	0.0066158	0.022744	0.975872	444	4	-0.25282	0.99338	0.99348	0.999996	18964	0	-0.25282	-2.17942
TRA2B	4	0.0066208	0.02276	0.975872	445	2	-0.056442	0.28899	0.42579	0.999996	8075	1	-0.056442	-2.17909
MECR	4	0.0066367	0.022812	0.975872	446	3	-0.26356	0.96607	0.96619	0.999996	18411	0	-0.26356	-2.17805
KCNA6	4	0.0066722	0.022918	0.975872	447	1	0.10381	0.35324	0.49452	0.999996	9421	2	0.10381	-2.17573
MAGEB3	4	0.0066897	0.022975	0.975872	448	3	-0.28789	0.62326	0.6637	0.999996	12569	1	-0.28789	-2.17459
LLGL2	4	0.0066941	0.02299	0.975872	449	4	-0.25447	0.99331	0.99339	0.999996	18962	0	-0.25447	-2.17431
NSMCE1	4	0.0066971	0.022995	0.975872	450	4	-0.24094	0.9933	0.99339	0.999996	18961	0	-0.24094	-2.17411
MAP3K6	4	0.0067183	0.023061	0.975872	451	3	-0.39373	0.14939	0.27555	0.993956	5280	1	-0.39373	-2.17274
VMAC	4	0.0067237	0.023078	0.975872	452	4	-0.20706	0.99328	0.99336	0.999996	18960	0	-0.20706	-2.17239
ADIPOQ	4	0.0067614	0.023219	0.978686	453	4	-0.10874	0.99324	0.99331	0.999996	18959	0	-0.10874	-2.16996
SMPX	4	0.006775	0.023268	0.978686	454	1	0.077027	0.21814	0.34958	0.999996	6654	1	0.077027	-2.16909
FXR2	4	0.0067863	0.023298	0.978686	455	3	-0.31502	0.95944	0.95951	0.999996	18302	0	-0.31502	-2.16837
OTUD7B	4	0.0068264	0.023424	0.981816	456	2	-0.080808	0.2221	0.35383	0.999996	6726	2	-0.080808	-2.16581
SLC28A2	4	0.0068778	0.023601	0.982075	457	1	0.093358	0.023205	0.064409	0.97304	1261	2	0.093358	-2.16255
PTGR2	4	0.0068815	0.023613	0.982075	458	4	-0.15768	0.99312	0.99318	0.999996	18958	0	-0.15768	-2.16232
HPRT1	4	0.0068988	0.023681	0.982075	459	4	-0.17614	0.9931	0.99317	0.999996	18957	0	-0.17614	-2.16123
GATM	4	0.0069291	0.023782	0.982075	460	2	-0.0253	0.43992	0.56691	0.999996	10783	1	-0.0253	-2.15932
CXorf49B	4	0.0069513	0.023844	0.982075	461	3	-0.39677	0.97076	0.97087	0.999996	18501	0	-0.39677	-2.15793
POLI	4	0.0069515	0.023844	0.982075	462	4	-0.20774	0.99305	0.99312	0.999996	18956	0	-0.20774	-2.15792
RIPK1	4	0.006992	0.023988	0.982075	463	4	-0.10654	0.99301	0.99308	0.999996	18955	0	-0.10654	-2.1554
POU3F4	4	0.0070068	0.024041	0.982075	464	3	-0.18904	0.98608	0.98615	0.999996	18817	0	-0.18904	-2.15448
TAGLN	4	0.0070108	0.024051	0.982075	465	4	-0.3456	0.99299	0.99306	0.999996	18954	0	-0.3456	-2.15423
GC	4	0.0070319	0.024126	0.982075	466	1	0.21297	0.1485	0.27461	0.993956	5264	2	0.21297	-2.15293
PHF23	4	0.0070503	0.024193	0.982075	467	4	-0.26638	0.99295	0.99303	0.999996	18953	0	-0.26638	-2.15179
CARD18	4	0.0070523	0.024197	0.982075	468	3	-0.27394	0.82263	0.82271	0.999996	15619	0	-0.27394	-2.15167
KLRD1	4	0.0070624	0.024226	0.982075	469	3	-0.34107	0.7746	0.77585	0.999996	14744	1	-0.34107	-2.15105
VPS29	4	0.0070723	0.024265	0.982075	470	4	-0.41722	0.99293	0.99301	0.999996	18952	0	-0.41722	-2.15044
BRCC3	4	0.0070726	0.024268	0.982075	471	3	-0.29037	0.98792	0.98797	0.999996	18855	0	-0.29037	-2.15042
SLC1A5	4	0.0070833	0.024306	0.982075	472	3	-0.13085	0.84633	0.84641	0.999996	16089	0	-0.13085	-2.14976
CIART	4	0.0071347	0.024466	0.982075	473	1	0.073517	0.21233	0.34337	0.999996	6542	2	0.073517	-2.14662
PDAP1	4	0.0071507	0.024518	0.982075	474	4	-0.44475	0.99285	0.99293	0.999996	18951	0	-0.44475	-2.14565
XG	4	0.0071692	0.024582	0.982075	475	4	-0.29188	0.99283	0.99291	0.999996	18950	0	-0.29188	-2.14453
ABI1	4	0.007186	0.024641	0.982075	476	2	-0.068807	0.90596	0.90591	0.999996	17208	0	-0.068807	-2.14351
DNAJC12	4	0.007213	0.024723	0.982075	477	3	-0.34722	0.16653	0.29408	0.998152	5630	1	-0.34722	-2.14188
GABRP	4	0.0072132	0.024723	0.982075	478	4	-0.29542	0.99279	0.99286	0.999996	18949	0	-0.29542	-2.14187
HSFY2	4	0.0072255	0.024762	0.982075	479	3	-0.28888	0.27139	0.40678	0.999996	7739	1	-0.28888	-2.14113
CFC1	4	0.0072306	0.024776	0.982075	480	2	-0.24128	0.84016	0.84029	0.999996	15972	0	-0.24128	-2.14083
SERPINE1	4	0.0072323	0.024783	0.982075	481	3	-0.27279	0.51543	0.60351	0.999996	11448	1	-0.27279	-2.14072
CNR1	4	0.0072374	0.024801	0.982075	482	1	0.059447	0.021594	0.060985	0.972143	1199	2	0.059447	-2.14042
PSG7	4	0.0072735	0.024927	0.982075	483	4	-0.14894	0.99273	0.9928	0.999996	18948	0	-0.14894	-2.13826
DAZ1	4	0.0073212	0.025076	0.982075	484	4	-0.21878	0.99268	0.99276	0.999996	18947	0	-0.21878	-2.13542
GNB1L	4	0.0073328	0.025115	0.982075	485	4	-0.45646	0.99267	0.99275	0.999996	18945	0	-0.45646	-2.13473
INAFM2	4	0.0073696	0.025231	0.982075	486	2	-0.11428	0.89021	0.89024	0.999996	16899	0	-0.11428	-2.13256
GRIK4	4	0.0073915	0.025296	0.982075	487	2	-0.19106	0.41286	0.55468	0.999996	10543	1	-0.19106	-2.13127
PRKRIP1	4	0.0074225	0.025404	0.982075	488	4	-0.19552	0.99258	0.99266	0.999996	18944	0	-0.19552	-2.12945
SLC35A2	4	0.0074429	0.025478	0.982075	489	1	-0.059893	0.82323	0.82333	0.999996	15631	0	-0.059893	-2.12826
USP16	4	0.0074848	0.025621	0.982075	490	4	-0.17961	0.99252	0.99259	0.999996	18943	0	-0.17961	-2.12582
TNRC18	4	0.0074942	0.025655	0.982075	491	1	0.11621	0.054943	0.12926	0.985229	2506	3	0.11621	-2.12527
DNAJC5	4	0.0075012	0.025677	0.982075	492	4	-0.20361	0.9925	0.99257	0.999996	18942	0	-0.20361	-2.12487
CALML6	4	0.0075062	0.02569	0.982075	493	3	-0.35061	0.84912	0.84922	0.999996	16136	0	-0.35061	-2.12458
UBE2O	4	0.0075151	0.025725	0.982075	494	2	-0.049826	0.3105	0.44898	0.999996	8516	2	-0.049826	-2.12407
LRRC69	4	0.0075172	0.025732	0.982075	495	3	-0.22919	0.9815	0.98159	0.999996	18703	0	-0.22919	-2.12394
OR56B4	4	0.0075326	0.025772	0.982075	496	3	-0.1995	0.0086237	0.029259	0.941204	573	1	-0.1995	-2.12306
ZNF518B	4	0.0075456	0.02581	0.982075	497	2	-0.035033	0.37141	0.51384	0.999996	9776	1	-0.035033	-2.12231
ZNF510	4	0.0075458	0.025811	0.982075	498	4	-0.20999	0.98872	0.98879	0.999996	18875	0	-0.20999	-2.12229
MCOLN3	4	0.0075525	0.025829	0.982075	499	3	-0.51061	0.89337	0.89337	0.999996	16959	0	-0.51061	-2.12191
PPP2R5E	4	0.0075569	0.025844	0.982075	500	3	-0.2607	0.986	0.98607	0.999996	18813	0	-0.2607	-2.12166
TMEM14B	4	0.0075724	0.025901	0.982075	501	3	-0.23291	0.71915	0.72964	0.999996	13839	1	-0.23291	-2.12077
ANKRD6	4	0.007597	0.02598	0.982075	502	2	-0.067096	0.58325	0.63987	0.999996	12133	1	-0.067096	-2.11936
ARHGAP11B	4	0.0076311	0.026083	0.982075	503	4	-0.56683	0.99151	0.99157	0.999996	18931	0	-0.56683	-2.11741
ALG10	4	0.0076408	0.026116	0.982075	504	2	-0.12399	0.21526	0.34652	0.999996	6597	1	-0.12399	-2.11686
CHAMP1	4	0.0076483	0.026145	0.982075	505	1	0.092255	0.14175	0.26727	0.993956	5125	2	0.092255	-2.11644
BTBD16	4	0.0076511	0.026155	0.982075	506	4	-0.30736	0.99235	0.99242	0.999996	18941	0	-0.30736	-2.11628
TXNRD3	4	0.0076997	0.026305	0.982075	507	1	-0.0369	0.5952	0.64674	0.999996	12266	1	-0.0369	-2.11353
RNF141	4	0.0077192	0.026361	0.982075	508	4	-0.14529	0.99049	0.99058	0.999996	18910	0	-0.14529	-2.11243
TSLP	4	0.007751	0.026466	0.982075	509	1	-0.024062	0.0369	0.09312	0.980568	1803	1	-0.024062	-2.11064
HKDC1	4	0.0077559	0.026477	0.982075	510	4	-0.15378	0.99224	0.99231	0.999996	18940	0	-0.15378	-2.11037
CAPN7	4	0.0078024	0.026615	0.982075	511	1	0.036159	0.78976	0.78999	0.999996	15021	1	0.036159	-2.10777
GPD1	4	0.0078069	0.026632	0.982075	512	3	-0.23451	0.9874	0.98747	0.999996	18845	0	-0.23451	-2.10752
DPPA4	4	0.0078127	0.026649	0.982075	513	4	-0.18806	0.99219	0.99225	0.999996	18939	0	-0.18806	-2.1072
UGT1A5	4	0.0078154	0.026657	0.982075	514	2	-0.113	0.77021	0.77189	0.999996	14661	1	-0.113	-2.10705
APOBEC1	4	0.0078227	0.026683	0.982075	515	3	-0.28791	0.79913	0.79916	0.999996	15207	1	-0.28791	-2.10664
FAP	4	0.0078509	0.026792	0.982075	516	3	-0.31095	0.90905	0.90903	0.999996	17267	0	-0.31095	-2.10508
MCAT	4	0.0078537	0.0268	0.982075	517	2	-0.060604	0.76943	0.77122	0.999996	14644	1	-0.060604	-2.10493
CIRH1A	4	0.0078702	0.026854	0.982075	518	3	-1.3389	0.93212	0.93207	0.999996	17755	0	-1.3389	-2.10401
GBP1	4	0.0078953	0.026933	0.982075	519	3	-0.22693	0.79819	0.79821	0.999996	15193	1	-0.22693	-2.10263
MINOS1-NBL1	4	0.0079051	0.026968	0.982075	520	1	-0.025345	0.96131	0.96138	0.999996	18333	0	-0.025345	-2.10209
NEK10	4	0.0079328	0.027053	0.982075	521	2	-0.099066	0.019866	0.057301	0.966778	1121	1	-0.099066	-2.10057
FAM186B	4	0.0079564	0.027118	0.982075	522	3	-0.16097	0.97951	0.97964	0.999996	18665	0	-0.16097	-2.09928
PRKCZ	4	0.0079757	0.027172	0.982075	523	2	-0.049717	0.17368	0.30184	0.998747	5773	2	-0.049717	-2.09823
NAIP	4	0.0079976	0.027238	0.982075	524	4	-0.19949	0.992	0.99208	0.999996	18937	0	-0.19949	-2.09704
CSNK2A3	4	0.0080078	0.027271	0.982075	525	2	-0.16568	0.12626	0.25049	0.993956	4813	1	-0.16568	-2.09649
NARF	4	0.0080456	0.027378	0.982075	526	2	-0.034029	0.087399	0.19137	0.986532	3692	2	-0.034029	-2.09444
RNF19B	4	0.0080564	0.027414	0.982075	527	2	-0.11101	0.47307	0.58261	0.999996	11059	1	-0.11101	-2.09386
KDM8	4	0.0080591	0.027419	0.982075	528	3	-0.195	0.82093	0.82102	0.999996	15585	0	-0.195	-2.09371
TSC22D2	4	0.0080672	0.027457	0.982075	529	2	-0.16287	0.86612	0.86623	0.999996	16440	0	-0.16287	-2.09328
EIF4E1B	4	0.0081104	0.027595	0.982075	530	3	-0.2278	0.97943	0.97956	0.999996	18662	0	-0.2278	-2.09096
MTRNR2L2	4	0.0081302	0.027658	0.982075	531	3	-0.26517	0.3745	0.51717	0.999996	9839	1	-0.26517	-2.0899
SPON2	4	0.0081321	0.027665	0.982075	532	2	-0.14922	0.64473	0.67726	0.999996	12831	1	-0.14922	-2.0898
MCCD1	4	0.0081592	0.027748	0.982075	533	3	-0.20725	0.97537	0.97551	0.999996	18584	0	-0.20725	-2.08835
KDM4D	4	0.0081618	0.027758	0.982075	534	3	-0.2925	0.9729	0.97304	0.999996	18542	0	-0.2925	-2.08821
RABAC1	4	0.0081708	0.027795	0.982075	535	3	-0.27542	0.83363	0.83375	0.999996	15842	0	-0.27542	-2.08774
H6PD	4	0.0081836	0.027839	0.982075	536	4	-0.23869	0.99182	0.99189	0.999996	18936	0	-0.23869	-2.08706
ADGRG2	4	0.0081917	0.027864	0.982075	537	3	-0.16537	0.74004	0.74626	0.999996	14154	1	-0.16537	-2.08663
ZKSCAN2	4	0.0081972	0.027884	0.982075	538	2	-0.1582	0.20804	0.33871	0.999996	6452	1	-0.1582	-2.08633
SLC35C1	4	0.0081987	0.027888	0.982075	539	3	-0.30588	0.92322	0.92328	0.999996	17569	0	-0.30588	-2.08626
GYPA	4	0.0082061	0.027913	0.982075	540	4	-0.094427	0.99179	0.99187	0.999996	18935	0	-0.094427	-2.08586
ZFP92	4	0.0082152	0.027951	0.982075	541	4	-0.13829	0.99178	0.99186	0.999996	18934	0	-0.13829	-2.08538
PMCH	4	0.0082173	0.02796	0.982075	542	3	-0.28507	0.91737	0.91735	0.999996	17443	0	-0.28507	-2.08527
WBP2	4	0.008229	0.028003	0.982075	543	3	-0.24969	0.92552	0.92547	0.999996	17623	0	-0.24969	-2.08465
MRPS23	4	0.0082299	0.028005	0.982075	544	2	0.15041	0.15834	0.28523	0.993956	5481	2	0.15041	-2.08461
FAM126A	4	0.0082408	0.028039	0.982075	545	2	-0.25267	0.98288	0.98299	0.999996	18733	0	-0.25267	-2.08403
C11orf63	4	0.0082456	0.028055	0.982075	546	4	-0.14686	0.99175	0.99183	0.999996	18933	0	-0.14686	-2.08378
IRX5	4	0.0082644	0.028107	0.982108	547	2	-0.07991	0.94838	0.94844	0.999996	18092	0	-0.07991	-2.08279
TEX261	4	0.0083087	0.02825	0.984211	548	4	-0.1606	0.99169	0.99176	0.999996	18932	0	-0.1606	-2.08047
KCNK15	4	0.0083158	0.02827	0.984211	549	2	-0.25299	0.96578	0.96589	0.999996	18405	0	-0.25299	-2.0801
C3orf70	4	0.0083502	0.028378	0.984619	550	3	-0.24991	0.11769	0.24123	0.991111	4649	1	-0.24991	-2.0783
UQCC3	4	0.0083556	0.028399	0.984619	551	2	-0.20666	0.17277	0.30087	0.998747	5753	1	-0.20666	-2.07802
FHOD1	4	0.0083671	0.028437	0.984619	552	2	-0.039996	0.32711	0.46664	0.999996	8877	2	-0.039996	-2.07743
PRKAR1B	4	0.0084184	0.028603	0.986618	553	1	0.065873	0.2314	0.36382	0.999996	6915	2	0.065873	-2.07477
BRWD1	4	0.0084354	0.028653	0.986618	554	2	-0.21881	0.95856	0.95863	0.999996	18279	0	-0.21881	-2.07389
RPL26	4	0.0084394	0.028665	0.986618	555	3	-0.45218	0.93512	0.93506	0.999996	17826	0	-0.45218	-2.07369
FSD2	4	0.0084698	0.028773	0.986618	556	2	-0.016606	0.26959	0.40485	0.999996	7707	2	-0.016606	-2.07213
TRIP4	4	0.0085211	0.028934	0.986618	557	1	0.10735	0.049452	0.11835	0.982021	2296	2	0.10735	-2.0695
EIF3D	4	0.0085477	0.029015	0.986618	558	3	-1.1573	0.98386	0.98398	0.999996	18753	0	-1.1573	-2.06815
TPM4	4	0.0085724	0.029106	0.986618	559	1	-0.041975	0.65041	0.68096	0.999996	12903	1	-0.041975	-2.0669
WDSUB1	4	0.0086032	0.029197	0.986618	560	4	-0.12077	0.9914	0.99147	0.999996	18930	0	-0.12077	-2.06534
PRKAG1	4	0.0086099	0.029216	0.986618	561	3	-0.40714	0.14932	0.27548	0.993956	5277	1	-0.40714	-2.065
EFCAB14	4	0.0086112	0.029219	0.986618	562	4	-0.19097	0.99139	0.99146	0.999996	18929	0	-0.19097	-2.06494
CLUH	4	0.0086317	0.02929	0.986618	563	4	-0.12255	0.99137	0.99144	0.999996	18928	0	-0.12255	-2.0639
TCF12	4	0.0086331	0.029293	0.986618	564	4	-0.091429	0.99137	0.99144	0.999996	18927	0	-0.091429	-2.06383
B3GNT8	4	0.0086449	0.029331	0.986618	565	4	-0.098243	0.99136	0.99143	0.999996	18926	0	-0.098243	-2.06324
PM20D1	4	0.0086489	0.029345	0.986618	566	3	-0.27554	0.96252	0.96263	0.999996	18352	0	-0.27554	-2.06304
ADAT3	4	0.008675	0.029416	0.986618	567	2	-0.13728	0.89211	0.89211	0.999996	16933	0	-0.13728	-2.06173
ITGB1BP1	4	0.0086992	0.029493	0.986618	568	4	-0.12682	0.9913	0.99137	0.999996	18925	0	-0.12682	-2.06052
SZT2	4	0.0087264	0.029573	0.986618	569	2	-0.029051	0.1953	0.32512	0.999996	6201	2	-0.029051	-2.05916
GREB1L	4	0.008744	0.029633	0.986618	570	3	-0.19392	0.89145	0.89147	0.999996	16922	0	-0.19392	-2.05829
MEGF10	4	0.0087777	0.029743	0.986618	571	2	0.064497	0.048414	0.1163	0.982021	2238	2	0.064497	-2.05662
SLC22A23	4	0.0087865	0.029772	0.986618	572	3	-0.25379	0.4969	0.59417	0.999996	11269	1	-0.25379	-2.05618
RBM33	4	0.008795	0.029795	0.986618	573	3	-0.26912	0.66509	0.69067	0.999996	13088	1	-0.26912	-2.05576
ZNF791	4	0.0088001	0.029813	0.986618	574	2	-0.12396	0.98044	0.98058	0.999996	18684	0	-0.12396	-2.05551
SGCB	4	0.0088096	0.029844	0.986618	575	3	-0.33568	0.29127	0.42821	0.999996	8129	1	-0.33568	-2.05504
PJA2	4	0.008819	0.029877	0.986618	576	4	-0.14276	0.99118	0.99125	0.999996	18923	0	-0.14276	-2.05458
SUCNR1	4	0.008829	0.029914	0.986618	577	2	-0.34833	0.9444	0.94444	0.999996	18003	0	-0.34833	-2.05409
SMAD7	4	0.0088424	0.029949	0.986618	578	2	-0.14437	0.32789	0.46747	0.999996	8896	2	-0.14437	-2.05343
LRP10	4	0.0088424	0.029949	0.986618	579	2	-0.21828	0.63747	0.6726	0.999996	12737	1	-0.21828	-2.05343
ZNF527	4	0.0088768	0.030058	0.986618	580	3	-0.35336	0.91094	0.91091	0.999996	17301	0	-0.35336	-2.05174
SERPINA11	4	0.0088815	0.030076	0.986618	581	4	-0.24051	0.99112	0.99119	0.999996	18922	0	-0.24051	-2.05151
HOGA1	4	0.0088995	0.030126	0.986618	582	4	-0.25008	0.9911	0.99118	0.999996	18921	0	-0.25008	-2.05063
NBR1	4	0.0089316	0.030228	0.986618	583	2	-0.18172	0.58504	0.6409	0.999996	12150	1	-0.18172	-2.04907
FAM96A	4	0.008949	0.030278	0.986618	584	4	-0.10969	0.99105	0.99113	0.999996	18920	0	-0.10969	-2.04823
SPATA17	4	0.008998	0.030429	0.986618	585	2	-0.05909	0.072674	0.16374	0.986532	3158	2	-0.05909	-2.04585
EEF1B2	4	0.0090047	0.030451	0.986618	586	3	-0.38144	0.73067	0.73873	0.999996	14012	1	-0.38144	-2.04553
THOC5	4	0.0090151	0.03048	0.986618	587	2	-0.34704	0.39503	0.53921	0.999996	10262	1	-0.34704	-2.04503
PRR27	4	0.0090342	0.030554	0.986618	588	2	-0.072816	0.95308	0.9532	0.999996	18189	0	-0.072816	-2.04411
FOXJ2	4	0.0090635	0.030654	0.986618	589	2	-0.36108	0.085418	0.18768	0.986532	3626	1	-0.36108	-2.0427
LDLR	4	0.0090815	0.03071	0.986618	590	3	-0.17984	0.93425	0.93419	0.999996	17807	0	-0.17984	-2.04184
PLXNA1	4	0.0090855	0.030721	0.986618	591	2	-0.11564	0.77166	0.77318	0.999996	14685	1	-0.11564	-2.04165
CDRT15L2	4	0.0090919	0.030738	0.986618	592	4	-0.28792	0.99091	0.99098	0.999996	18919	0	-0.28792	-2.04135
ALOX5AP	4	0.0091063	0.030783	0.986618	593	2	-0.087038	0.41002	0.55342	0.999996	10515	1	-0.087038	-2.04066
USP9X	4	0.0091231	0.030835	0.986618	594	4	-0.22164	0.99088	0.99095	0.999996	18918	0	-0.22164	-2.03986
SF3B1	4	0.0091231	0.030835	0.986618	595	4	-0.5628	0.99088	0.99095	0.999996	18917	0	-0.5628	-2.03986
NOX4	4	0.0091368	0.030881	0.986618	596	1	-0.053448	0.87097	0.87102	0.999996	16534	0	-0.053448	-2.03921
RLN3	4	0.0091464	0.030917	0.986618	597	2	-0.14977	0.84688	0.84699	0.999996	16105	0	-0.14977	-2.03875
C20orf202	4	0.0091635	0.030968	0.986618	598	2	-0.14286	0.37899	0.52197	0.999996	9930	2	-0.14286	-2.03794
CPSF4L	4	0.0091779	0.031011	0.986618	599	2	-0.1459	0.10506	0.2236	0.987119	4316	2	-0.1459	-2.03726
PALLD	4	0.00921	0.031115	0.986618	600	3	-0.27318	0.91966	0.91967	0.999996	17487	0	-0.27318	-2.03574
KDM7A	4	0.0092152	0.031128	0.986618	601	4	-0.15592	0.98884	0.98891	0.999996	18880	0	-0.15592	-2.0355
KIF26A	4	0.0092394	0.03121	0.986618	602	2	-0.043874	0.66241	0.68887	0.999996	13055	1	-0.043874	-2.03436
MSL1	4	0.0092564	0.031267	0.986618	603	3	-0.3642	0.82135	0.82147	0.999996	15594	0	-0.3642	-2.03356
FKBP7	4	0.0092907	0.031363	0.986618	604	2	-0.12304	0.76428	0.76661	0.999996	14544	1	-0.12304	-2.03195
SPCS1	4	0.0093128	0.03143	0.986618	605	4	-0.19638	0.99069	0.99078	0.999996	18915	0	-0.19638	-2.03092
SLFNL1	4	0.0093462	0.031538	0.986618	606	4	-0.15196	0.99065	0.99074	0.999996	18914	0	-0.15196	-2.02936
GCSH	4	0.0093913	0.031687	0.986618	607	2	-0.4295	0.9448	0.94486	0.999996	18010	0	-0.4295	-2.02727
GPATCH11	4	0.0093933	0.031695	0.986618	608	2	-0.13573	0.79061	0.79081	0.999996	15034	1	-0.13573	-2.02718
RAD18	4	0.0094157	0.031766	0.986618	609	3	-0.18367	0.78729	0.78765	0.999996	14974	1	-0.18367	-2.02615
LRRC48	4	0.0094174	0.031771	0.986618	610	3	-0.21593	0.34252	0.48309	0.999996	9200	1	-0.21593	-2.02607
BDH2	4	0.0094465	0.031871	0.986618	611	2	-0.038083	0.07519	0.16858	0.986532	3249	2	-0.038083	-2.02473
SHC1	4	0.0094565	0.031902	0.986618	612	3	-0.28387	0.30958	0.44794	0.999996	8499	1	-0.28387	-2.02427
DCLRE1B	4	0.0094647	0.031931	0.986618	613	4	-0.23904	0.99054	0.99062	0.999996	18913	0	-0.23904	-2.02389
AIM1L	4	0.0094958	0.032027	0.986618	614	2	-0.071703	0.40685	0.55205	0.999996	10489	1	-0.071703	-2.02247
BST2	4	0.0095079	0.032062	0.986618	615	4	-0.2884	0.99049	0.99058	0.999996	18912	0	-0.2884	-2.02192
PAX8	4	0.0095127	0.03208	0.986618	616	3	-0.13441	0.84134	0.84149	0.999996	15996	0	-0.13441	-2.0217
AHSP	4	0.0095222	0.032111	0.986618	617	2	-0.15286	0.15464	0.28121	0.993956	5395	2	-0.15286	-2.02126
LMBRD2	4	0.0095284	0.032131	0.986618	618	4	-0.15271	0.99047	0.99056	0.999996	18909	0	-0.15271	-2.02098
PRDM12	4	0.0095639	0.032245	0.986618	619	3	-0.39223	0.98289	0.983	0.999996	18735	0	-0.39223	-2.01936
PSMD5	4	0.0096002	0.032347	0.986618	620	4	-0.24656	0.9904	0.9905	0.999996	18907	0	-0.24656	-2.01772
MRPL40	4	0.0096217	0.032412	0.986618	621	2	-0.091411	0.1091	0.23084	0.988524	4460	1	-0.091411	-2.01675
DLL1	4	0.0096334	0.032453	0.986618	622	3	-0.22806	0.94609	0.94612	0.999996	18043	0	-0.22806	-2.01622
SOHLH1	4	0.0096497	0.032508	0.986618	623	1	0.022445	0.076644	0.17137	0.986532	3307	1	0.022445	-2.01549
ZNF25	4	0.0096606	0.032548	0.986618	624	4	-0.12261	0.99034	0.99043	0.999996	18906	0	-0.12261	-2.015
FLCN	4	0.0096781	0.032602	0.986618	625	4	-0.38474	0.99032	0.99041	0.999996	18905	0	-0.38474	-2.01421
GLT6D1	4	0.0096804	0.032608	0.986618	626	2	-0.31422	0.7652	0.7674	0.999996	14563	1	-0.31422	-2.01411
WARS2	4	0.009701	0.032664	0.986618	627	1	0.18431	0.030713	0.080336	0.980459	1556	2	0.18431	-2.01318
ITPRIP	4	0.0097058	0.032679	0.986618	628	3	-0.19272	0.62006	0.66172	0.999996	12543	1	-0.19272	-2.01297
RSPH10B	4	0.009718	0.032718	0.986618	629	4	-0.13586	0.99028	0.99037	0.999996	18904	0	-0.13586	-2.01242
LOC100129924	4	0.0097275	0.032746	0.986618	630	3	-0.19324	0.90713	0.90709	0.999996	17229	0	-0.19324	-2.012
CNOT4	4	0.0097452	0.032811	0.986618	631	4	-0.17409	0.99025	0.99035	0.999996	18902	0	-0.17409	-2.01121
ARL10	4	0.0097492	0.032825	0.986618	632	4	-0.21619	0.99025	0.99035	0.999996	18901	0	-0.21619	-2.01103
SYT7	4	0.0097733	0.032883	0.986618	633	3	-0.49814	0.97929	0.97943	0.999996	18661	0	-0.49814	-2.00996
ARL5C	4	0.0098035	0.032967	0.986618	634	2	-0.023057	0.17416	0.30236	0.998747	5783	2	-0.023057	-2.00862
PTPN23	4	0.0098177	0.033019	0.986618	635	3	-0.20566	0.06761	0.15402	0.986532	2956	1	-0.20566	-2.00799
TSSK2	4	0.0098304	0.033055	0.986618	636	4	-0.17687	0.99017	0.99027	0.999996	18900	0	-0.17687	-2.00743
INPP5B	4	0.0098548	0.033141	0.986618	637	3	-0.2762	0.95292	0.95304	0.999996	18183	0	-0.2762	-2.00635
SCNN1D	4	0.0098647	0.033166	0.986618	638	3	-0.1882	0.069373	0.15741	0.986532	3021	1	-0.1882	-2.00592
SAMD7	4	0.0098695	0.033183	0.986618	639	2	-0.18481	0.45482	0.57383	0.999996	10906	1	-0.18481	-2.0057
PRDM14	4	0.009891	0.033248	0.986618	640	3	-0.22166	0.70774	0.72096	0.999996	13681	1	-0.22166	-2.00476
FAM50A	4	0.0098962	0.033268	0.986618	641	2	-0.14206	0.56184	0.62794	0.999996	11912	1	-0.14206	-2.00453
TAAR2	4	0.009906	0.033293	0.986618	642	2	-0.11204	0.3021	0.43995	0.999996	8349	1	-0.11204	-2.0041
GAGE2B	4	0.0099573	0.033457	0.986618	643	1	0.2442	0.057864	0.135	0.986532	2605	3	0.2442	-2.00186
MRI1	4	0.0099666	0.033484	0.986618	644	4	-0.21465	0.99003	0.99013	0.999996	18899	0	-0.21465	-2.00145
ANAPC7	4	0.0099766	0.03352	0.986618	645	3	-0.20943	0.98288	0.98298	0.999996	18732	0	-0.20943	-2.00102
AMPD3	4	0.0099829	0.033539	0.986618	646	4	-0.17384	0.99002	0.99011	0.999996	18898	0	-0.17384	-2.00074
ELAC2	4	0.010009	0.033617	0.986618	647	2	-0.31314	0.66019	0.68742	0.999996	13030	1	-0.31314	-1.99961
FAM229A	4	0.010051	0.033737	0.986618	648	4	-0.20443	0.98995	0.99004	0.999996	18897	0	-0.20443	-1.99779
ZBED8	4	0.010056	0.033752	0.986618	649	4	-0.1322	0.98994	0.99003	0.999996	18896	0	-0.1322	-1.99757
OR52D1	4	0.01006	0.033764	0.986618	650	3	-0.19642	0.98689	0.98696	0.999996	18831	0	-0.19642	-1.9974
ANXA2	4	0.010072	0.033802	0.986618	651	2	-0.18551	0.6656	0.69103	0.999996	13097	1	-0.18551	-1.99688
NOL6	4	0.010111	0.033908	0.986618	652	3	-0.57018	0.9009	0.90092	0.999996	17104	0	-0.57018	-1.99521
EPB41L4B	4	0.010162	0.034074	0.986618	653	3	-0.25436	0.58515	0.64097	0.999996	12152	1	-0.25436	-1.99302
C18orf42	4	0.010162	0.034075	0.986618	654	3	-0.16387	0.64898	0.68005	0.999996	12887	1	-0.16387	-1.99302
OR2T33	4	0.010205	0.034204	0.986618	655	2	-0.094647	0.73452	0.74177	0.999996	14069	1	-0.094647	-1.99119
CLSPN	4	0.010214	0.034231	0.986618	656	1	-0.065627	0.8968	0.8968	0.999996	17022	0	-0.065627	-1.9908
NIPSNAP3B	4	0.010228	0.034278	0.986618	657	4	-0.11307	0.98977	0.98985	0.999996	18895	0	-0.11307	-1.99021
DHPS	4	0.010248	0.034343	0.986618	658	3	-0.38481	0.95122	0.95135	0.999996	18146	0	-0.38481	-1.98936
GP2	4	0.010255	0.034366	0.986618	659	3	-0.34454	0.54385	0.61826	0.999996	11735	1	-0.34454	-1.98906
ACCS	4	0.010265	0.034399	0.986618	660	2	-0.094815	0.1375	0.2627	0.993956	5037	1	-0.094815	-1.98864
OR1D2	4	0.010287	0.034468	0.986618	661	3	-0.1655	0.19968	0.32984	0.999996	6289	1	-0.1655	-1.98771
GLP1R	4	0.010296	0.034498	0.986618	662	4	-0.1798	0.9897	0.98979	0.999996	18894	0	-0.1798	-1.98733
OR4K15	4	0.010313	0.034549	0.986618	663	2	-0.20531	0.92264	0.92271	0.999996	17551	0	-0.20531	-1.98661
SLC6A16	4	0.010316	0.034557	0.986618	664	3	-0.14605	0.42472	0.56003	0.999996	10661	1	-0.14605	-1.98649
GNL3	4	0.010332	0.034591	0.986618	665	4	-0.61128	0.98967	0.98976	0.999996	18893	0	-0.61128	-1.98582
MNX1	4	0.010356	0.034672	0.986618	666	3	-0.20666	0.90619	0.90615	0.999996	17211	0	-0.20666	-1.98481
ZNF735	4	0.010367	0.034702	0.986618	667	1	-0.025067	0.16333	0.29064	0.996549	5574	1	-0.025067	-1.98435
NFXL1	4	0.010368	0.034703	0.986618	668	2	-0.14926	0.8317	0.83185	0.999996	15798	0	-0.14926	-1.98431
CTBP1	4	0.010377	0.034727	0.986618	669	4	-0.16032	0.98962	0.9897	0.999996	18892	0	-0.16032	-1.98393
DLEU7	4	0.010395	0.034786	0.986618	670	3	-0.42957	0.9598	0.95986	0.999996	18307	0	-0.42957	-1.98318
ZNF428	4	0.010404	0.034817	0.986618	671	3	-0.14993	0.98078	0.98088	0.999996	18690	0	-0.14993	-1.9828
PTPRO	4	0.010419	0.034865	0.986618	672	2	-0.089192	0.91106	0.91103	0.999996	17303	0	-0.089192	-1.98217
EDEM1	4	0.010464	0.035013	0.986618	673	4	-0.16596	0.98954	0.98962	0.999996	18891	0	-0.16596	-1.9803
DEFB106A	4	0.01047	0.035029	0.986618	674	3	-0.2314	0.68219	0.70245	0.999996	13315	1	-0.2314	-1.98005
PRKACB	4	0.010493	0.035095	0.986618	675	4	-0.12143	0.98951	0.98959	0.999996	18890	0	-0.12143	-1.9791
SPDYE5	4	0.010502	0.035115	0.986618	676	3	-0.20567	0.71562	0.72687	0.999996	13780	1	-0.20567	-1.97873
ARMCX4	4	0.010521	0.035171	0.986618	677	2	-0.054394	0.13861	0.26388	0.993956	5058	2	-0.054394	-1.97794
MTMR8	4	0.010551	0.035268	0.986618	678	2	-0.3075	0.77772	0.77873	0.999996	14806	1	-0.3075	-1.97671
HIST2H2AA3	4	0.010561	0.035302	0.986618	679	3	-0.17717	0.7336	0.74103	0.999996	14054	1	-0.17717	-1.97629
PGPEP1	4	0.010572	0.035335	0.986618	680	1	0.04098	0.55313	0.62325	0.999996	11834	1	0.04098	-1.97584
RHOV	4	0.010575	0.035347	0.986618	681	2	-0.10709	0.90029	0.90033	0.999996	17089	0	-0.10709	-1.97572
MIIP	4	0.010612	0.035464	0.986618	682	3	-0.1887	0.73115	0.7391	0.999996	14022	1	-0.1887	-1.9742
ITLN1	4	0.010626	0.035513	0.986618	683	3	-0.21156	0.96775	0.96783	0.999996	18448	0	-0.21156	-1.97363
ZNF558	4	0.010654	0.0356	0.986618	684	3	-0.12714	0.861	0.86117	0.999996	16343	0	-0.12714	-1.97249
CXCL1	4	0.010655	0.035605	0.986618	685	4	-0.19444	0.98935	0.98944	0.999996	18889	0	-0.19444	-1.97245
PLP2	4	0.010662	0.035628	0.986618	686	3	-0.16936	0.01788	0.05297	0.966778	1039	1	-0.16936	-1.97216
TTLL6	4	0.010673	0.035663	0.986618	687	3	-0.32136	0.256	0.39018	0.999996	7440	1	-0.32136	-1.97171
SMC5	4	0.010675	0.035665	0.986618	688	2	-0.15167	0.40758	0.55235	0.999996	10494	1	-0.15167	-1.97163
RECQL4	4	0.010762	0.035955	0.986618	689	3	-0.24434	0.2511	0.38492	0.999996	7335	1	-0.24434	-1.96811
PTEN	4	0.010775	0.035998	0.986618	690	4	-0.20786	0.98922	0.98932	0.999996	18888	0	-0.20786	-1.96758
RBM46	4	0.010775	0.035998	0.986618	691	3	-0.25972	0.63808	0.67296	0.999996	12744	1	-0.25972	-1.96758
C6orf132	4	0.010824	0.036148	0.986618	692	4	-0.21022	0.98918	0.98927	0.999996	18887	0	-0.21022	-1.96561
TUSC3	4	0.010829	0.036162	0.986618	693	2	-0.075189	0.14552	0.27141	0.993956	5207	1	-0.075189	-1.96541
ORAI2	4	0.010846	0.036219	0.986618	694	3	-0.21972	0.96625	0.96636	0.999996	18413	0	-0.21972	-1.96473
NAPA	4	0.010874	0.036305	0.986618	695	4	-0.47738	0.98913	0.98922	0.999996	18886	0	-0.47738	-1.96361
CHMP1A	4	0.01088	0.036323	0.986618	696	2	-0.15933	0.63727	0.67246	0.999996	12736	1	-0.15933	-1.96337
DUSP27	4	0.010881	0.036328	0.986618	697	3	-0.22131	0.57013	0.63253	0.999996	12010	1	-0.22131	-1.96333
CD59	4	0.010885	0.036335	0.986618	698	4	-0.17078	0.98912	0.98921	0.999996	18884	0	-0.17078	-1.96317
GEMIN5	4	0.010897	0.036373	0.986618	699	3	-0.45569	0.81234	0.8124	0.999996	15438	0	-0.45569	-1.96269
CCR2	4	0.010898	0.036377	0.986618	700	3	-0.21919	0.88616	0.88622	0.999996	16823	0	-0.21919	-1.96265
FAR2	4	0.010914	0.03642	0.986618	701	4	-0.19969	0.98909	0.98917	0.999996	18883	0	-0.19969	-1.96202
CLDN17	4	0.010931	0.036479	0.986618	702	3	-0.13971	0.52259	0.60718	0.999996	11518	1	-0.13971	-1.96134
HOXA7	4	0.010948	0.036535	0.986618	703	3	-0.19959	0.97715	0.97729	0.999996	18619	0	-0.19959	-1.96067
SIGLEC15	4	0.010973	0.036618	0.986618	704	3	-0.31124	0.057571	0.13442	0.986532	2598	1	-0.31124	-1.95967
FRG2C	4	0.010982	0.036641	0.986618	705	3	-0.24658	0.013592	0.043509	0.955604	864	1	-0.24658	-1.95932
PCDHGA12	4	0.010997	0.03669	0.986618	706	3	-0.22625	0.5401	0.61628	0.999996	11694	1	-0.22625	-1.95873
MYADML2	4	0.011009	0.036726	0.986618	707	2	-0.077559	0.44685	0.57013	0.999996	10839	1	-0.077559	-1.95825
ARSD	4	0.011029	0.036798	0.986618	708	4	-0.10375	0.98897	0.98904	0.999996	18882	0	-0.10375	-1.95746
ARCN1	4	0.011033	0.036814	0.986618	709	2	-0.42794	0.5179	0.60476	0.999996	11471	1	-0.42794	-1.95731
KLHL7	4	0.011065	0.036919	0.986618	710	2	-0.16689	0.43845	0.56622	0.999996	10770	1	-0.16689	-1.95605
HPCAL1	4	0.01108	0.036967	0.986618	711	3	-0.26128	0.42154	0.55859	0.999996	10624	1	-0.26128	-1.95546
OR5M11	4	0.011085	0.036982	0.986618	712	1	0.021691	0.65115	0.68145	0.999996	12913	1	0.021691	-1.95526
NT5DC3	4	0.011106	0.037051	0.986618	713	3	-0.23814	0.88556	0.8856	0.999996	16812	0	-0.23814	-1.95444
ADCYAP1R1	4	0.011136	0.037146	0.986618	714	3	-0.13812	0.86974	0.86978	0.999996	16509	0	-0.13812	-1.95327
CIC	4	0.011164	0.037238	0.986618	715	4	-0.14111	0.98884	0.9889	0.999996	18879	0	-0.14111	-1.95218
TBX5	4	0.011171	0.037261	0.986618	716	4	-0.23695	0.98883	0.9889	0.999996	18878	0	-0.23695	-1.95191
LRMP	4	0.011187	0.03731	0.986618	717	1	-0.16458	0.084162	0.18537	0.986532	3572	1	-0.16458	-1.95129
SLC35A1	4	0.011188	0.037313	0.986618	718	4	-0.26963	0.98881	0.98888	0.999996	18877	0	-0.26963	-1.95125
CYGB	4	0.011208	0.037366	0.986618	719	4	-0.18398	0.98879	0.98886	0.999996	18876	0	-0.18398	-1.95047
MDC1	4	0.011227	0.037421	0.986618	720	3	-0.50838	0.7509	0.75526	0.999996	14325	1	-0.50838	-1.94974
XKRY2	4	0.011238	0.037453	0.986618	721	3	-0.11921	0.98692	0.987	0.999996	18833	0	-0.11921	-1.94931
GPR132	4	0.011341	0.037742	0.986618	722	1	-0.00334	0.65603	0.68466	0.999996	12970	1	-0.00334	-1.94535
XBP1	4	0.011392	0.037848	0.986618	723	1	-0.018068	0.44129	0.56755	0.999996	10794	1	-0.018068	-1.9434
RHBDL2	4	0.011399	0.037861	0.986618	724	2	-0.24918	0.4138	0.55508	0.999996	10549	1	-0.24918	-1.94313
AGAP2	4	0.011412	0.037896	0.986618	725	3	-0.34367	0.56406	0.62916	0.999996	11940	1	-0.34367	-1.94264
ASCL1	4	0.011425	0.037919	0.986618	726	3	-0.19086	0.96934	0.96943	0.999996	18466	0	-0.19086	-1.94214
AKAP7	4	0.011443	0.037961	0.986618	727	3	-0.16308	0.037553	0.094508	0.980568	1828	1	-0.16308	-1.94146
CMTM4	4	0.011469	0.038009	0.986618	728	3	-0.16687	0.88134	0.88136	0.999996	16733	0	-0.16687	-1.94047
TM4SF19	4	0.011479	0.038024	0.986618	729	3	-0.11169	0.43798	0.56599	0.999996	10767	1	-0.11169	-1.9401
PLCG2	4	0.011488	0.038043	0.986618	730	3	-0.19866	0.38866	0.5324	0.999996	10140	1	-0.19866	-1.93976
PPIAL4G	4	0.011494	0.038056	0.986618	731	1	-0.48635	0.3812	0.5244	0.999996	9981	1	-0.48635	-1.93953
F8A1	4	0.011546	0.038179	0.986618	732	2	-0.083824	0.8383	0.83844	0.999996	15940	0	-0.083824	-1.93757
AGO1	4	0.011546	0.03818	0.986618	733	2	-0.17226	0.29445	0.43162	0.999996	8193	1	-0.17226	-1.93757
MAGEB6	4	0.011572	0.03823	0.986618	734	3	-0.18852	0.69024	0.70811	0.999996	13435	1	-0.18852	-1.93659
OTUD4	4	0.011594	0.038283	0.986618	735	2	-0.18747	0.19143	0.32098	0.999996	6121	2	-0.18747	-1.93577
CHMP3	4	0.011597	0.038293	0.986618	736	3	-0.24573	0.78451	0.78501	0.999996	14926	1	-0.24573	-1.93565
EEF2KMT	4	0.011648	0.038391	0.986618	737	1	0.075645	0.18837	0.31765	0.999996	6064	2	0.075645	-1.93375
FAM47E	4	0.011738	0.038582	0.986618	738	3	-0.24212	0.59477	0.64648	0.999996	12260	1	-0.24212	-1.93041
HAPLN1	4	0.01179	0.038695	0.986618	739	3	-0.22093	0.91814	0.9181	0.999996	17465	0	-0.22093	-1.92849
RFC4	4	0.011791	0.038697	0.986618	740	3	-0.24467	0.95975	0.95981	0.999996	18305	0	-0.24467	-1.92845
FXR1	4	0.011796	0.038708	0.986618	741	3	-0.19593	0.39311	0.53716	0.999996	10224	1	-0.19593	-1.92827
CEP70	4	0.011802	0.038718	0.986618	742	1	-0.017052	0.72411	0.73352	0.999996	13911	1	-0.017052	-1.92804
MERTK	4	0.011858	0.038841	0.986618	743	2	-0.022952	0.0011172	0.0040921	0.915891	83	2	-0.022952	-1.92599
ETNK1	4	0.01188	0.038891	0.986618	744	2	-0.14863	0.85878	0.85895	0.999996	16300	0	-0.14863	-1.92518
ADAMTS1	4	0.011904	0.038947	0.986618	745	2	-0.03156	0.17112	0.2991	0.998747	5716	2	-0.03156	-1.92431
EI24	4	0.011908	0.038963	0.986618	746	3	-0.26021	0.90424	0.90421	0.999996	17167	0	-0.26021	-1.92416
FBXO3	4	0.011929	0.039002	0.986618	747	3	-0.29216	0.8275	0.82765	0.999996	15714	0	-0.29216	-1.9234
JMJD4	4	0.011932	0.039008	0.986618	748	3	-0.29347	0.54382	0.61824	0.999996	11734	1	-0.29347	-1.92329
ANO3	4	0.011955	0.039058	0.986618	749	1	0.24574	0.054903	0.12919	0.985229	2502	3	0.24574	-1.92245
SLC2A14	4	0.011985	0.039126	0.986618	750	3	-0.17998	0.42322	0.55936	0.999996	10644	1	-0.17998	-1.92136
DHFRL1	4	0.011994	0.039145	0.986618	751	3	-0.32714	0.15662	0.28337	0.993956	5438	1	-0.32714	-1.92104
HPS5	4	0.012	0.039163	0.986618	752	3	-0.35031	0.96703	0.96713	0.999996	18430	0	-0.35031	-1.92082
CR1	4	0.012006	0.039177	0.986618	753	1	0.032657	0.17214	0.30019	0.998747	5739	2	0.032657	-1.9206
BLOC1S2	4	0.01203	0.03923	0.986618	754	2	-0.20012	0.72698	0.73581	0.999996	13959	1	-0.20012	-1.91973
FBXO9	4	0.012056	0.039285	0.986618	755	2	-0.18142	0.31821	0.45712	0.999996	8682	2	-0.18142	-1.9188
GSK3B	4	0.012058	0.039288	0.986618	756	1	0.058411	0.64434	0.67701	0.999996	12825	1	0.058411	-1.91872
BHMT2	4	0.012108	0.039399	0.986618	757	2	-0.14979	0.31424	0.45294	0.999996	8599	1	-0.14979	-1.91693
IVD	4	0.012109	0.0394	0.986618	758	2	-0.026451	0.35752	0.49907	0.999996	9508	2	-0.026451	-1.91689
RUFY2	4	0.012128	0.039449	0.986618	759	3	-0.28156	0.47264	0.58241	0.999996	11056	1	-0.28156	-1.91621
NKAPL	4	0.012155	0.03951	0.986618	760	3	-0.16107	0.97631	0.97645	0.999996	18597	0	-0.16107	-1.91525
AMER1	4	0.01216	0.039522	0.986618	761	2	-0.084066	0.19056	0.32004	0.999996	6108	2	-0.084066	-1.91507
DAG1	4	0.012206	0.039628	0.986618	762	3	-0.21144	0.96022	0.96028	0.999996	18315	0	-0.21144	-1.91343
RPS13	4	0.012211	0.039642	0.986618	763	1	-0.79615	0.86274	0.86288	0.999996	16375	0	-0.79615	-1.91325
CAMK1D	4	0.012239	0.039701	0.986618	764	2	-0.13046	0.78366	0.78421	0.999996	14909	1	-0.13046	-1.91225
NAPRT	4	0.012262	0.039757	0.986618	765	2	-0.10441	0.32165	0.4608	0.999996	8762	1	-0.10441	-1.91144
OR5P2	4	0.012308	0.03986	0.986618	766	2	-0.16895	0.37978	0.52286	0.999996	9947	2	-0.16895	-1.90981
CHRNA6	4	0.012313	0.039871	0.986618	767	2	-0.096785	0.38574	0.52928	0.999996	10079	1	-0.096785	-1.90964
DSTN	4	0.012365	0.039993	0.986618	768	1	0.042941	0.33578	0.47584	0.999996	9060	1	0.042941	-1.90781
CCDC85C	4	0.01239	0.040048	0.986618	769	2	-0.025041	0.15565	0.28233	0.993956	5414	2	-0.025041	-1.90693
PLGRKT	4	0.012416	0.040107	0.986618	770	2	-0.015094	0.80104	0.80108	0.999996	15248	1	-0.015094	-1.90602
SH3BP4	4	0.012467	0.040215	0.986618	771	2	-0.051733	0.55986	0.62684	0.999996	11894	1	-0.051733	-1.90424
SASS6	4	0.012496	0.040283	0.986618	772	2	-0.066277	0.81705	0.81712	0.999996	15521	0	-0.066277	-1.90323
TOR1AIP2	4	0.012518	0.040325	0.986618	773	2	-0.028192	0.24547	0.37889	0.999996	7215	2	-0.028192	-1.90247
AK5	4	0.012552	0.040389	0.986618	774	3	-0.29335	0.96575	0.96587	0.999996	18402	0	-0.29335	-1.90129
GJC2	4	0.012569	0.040439	0.986618	775	2	-0.099202	0.52036	0.60604	0.999996	11494	1	-0.099202	-1.9007
PPIE	4	0.01262	0.04057	0.986618	776	1	0.13715	0.09107	0.19811	0.986532	3822	2	0.13715	-1.89894
ZNF554	4	0.012709	0.040745	0.986618	777	2	-0.068309	0.52219	0.60698	0.999996	11515	1	-0.068309	-1.89589
ZNF578	4	0.012723	0.040773	0.986618	778	2	-0.081656	0.20891	0.33964	0.999996	6470	1	-0.081656	-1.89541
TTC28	4	0.012773	0.040892	0.986618	779	2	-0.19887	0.52879	0.61036	0.999996	11584	1	-0.19887	-1.89371
RAP1GAP2	4	0.012774	0.040894	0.986618	780	1	-0.02429	0.33367	0.47363	0.999996	9023	1	-0.02429	-1.89367
TAL2	4	0.01281	0.040961	0.986618	781	2	-0.17267	0.86199	0.86214	0.999996	16361	0	-0.17267	-1.89245
ZNF829	4	0.012823	0.040989	0.986618	782	2	-0.069531	0.74801	0.75285	0.999996	14283	1	-0.069531	-1.89201
TDRD6	4	0.012825	0.040996	0.986618	783	2	-0.012704	0.10178	0.21775	0.987119	4211	1	-0.012704	-1.89194
LAMB2	4	0.01284	0.041039	0.986618	784	2	-0.16062	0.89791	0.8979	0.999996	17046	0	-0.16062	-1.89143
HARBI1	4	0.01284	0.041039	0.986618	785	2	-0.24953	0.62708	0.66602	0.999996	12619	1	-0.24953	-1.89143
KIAA0319	4	0.012849	0.041057	0.986618	786	3	-0.16084	0.3927	0.53671	0.999996	10212	1	-0.16084	-1.89113
ATP8B2	4	0.012876	0.041116	0.986618	787	3	-0.44891	0.56995	0.63243	0.999996	12009	1	-0.44891	-1.89022
C4orf46	4	0.012927	0.041232	0.986618	788	3	-0.12497	0.92472	0.92469	0.999996	17612	0	-0.12497	-1.8885
C19orf12	4	0.012979	0.041333	0.986618	789	1	0.2053	0.0021934	0.0079053	0.915891	159	2	0.2053	-1.88676
KLRK1	4	0.012984	0.041345	0.986618	790	3	-0.2663	0.9775	0.97764	0.999996	18626	0	-0.2663	-1.88659
TPST2	4	0.013037	0.041465	0.986618	791	3	-0.20526	0.74077	0.74687	0.999996	14168	1	-0.20526	-1.88482
PLEK	4	0.013049	0.041488	0.986618	792	2	-0.2334	0.26268	0.39738	0.999996	7565	1	-0.2334	-1.88442
SOX3	4	0.013055	0.0415	0.986618	793	2	-0.095874	0.8122	0.81227	0.999996	15434	0	-0.095874	-1.88422
MFAP4	4	0.013055	0.0415	0.986618	794	2	-0.05628	0.042762	0.10507	0.982021	2039	1	-0.05628	-1.88422
ZNF251	4	0.013089	0.041577	0.986618	795	3	-0.33717	0.49497	0.59319	0.999996	11246	1	-0.33717	-1.88309
NOP58	4	0.013132	0.041665	0.986618	796	2	-0.62737	0.23938	0.37238	0.999996	7075	2	-0.62737	-1.88167
TACR2	4	0.013149	0.041707	0.986618	797	3	-0.21317	0.93634	0.93628	0.999996	17850	0	-0.21317	-1.88111
PRORY	4	0.013174	0.041764	0.986618	798	3	-0.16349	0.88314	0.88321	0.999996	16777	0	-0.16349	-1.88028
NTSR2	4	0.013183	0.041785	0.986618	799	2	-0.084137	0.73922	0.74559	0.999996	14142	1	-0.084137	-1.87999
ENTPD2	4	0.013201	0.041822	0.986618	800	3	-0.43021	0.49961	0.59554	0.999996	11296	1	-0.43021	-1.87939
BSG	4	0.013234	0.041895	0.986618	801	3	-0.14906	0.65358	0.68304	0.999996	12939	1	-0.14906	-1.87831
GAD2	4	0.013283	0.041999	0.986618	802	3	-0.18442	0.26833	0.4035	0.999996	7679	1	-0.18442	-1.8767
SLC16A12	4	0.013285	0.042003	0.986618	803	2	-0.29099	0.97318	0.97331	0.999996	18549	0	-0.29099	-1.87664
BEST4	4	0.013295	0.042025	0.986618	804	3	-0.24368	0.96635	0.96646	0.999996	18415	0	-0.24368	-1.87631
EIF2AK1	4	0.01331	0.042058	0.986618	805	3	-0.25897	0.949	0.94907	0.999996	18105	0	-0.25897	-1.87582
STK38L	4	0.013324	0.042082	0.986618	806	2	-0.0096164	0.031764	0.082516	0.980459	1604	2	-0.0096164	-1.87537
TBK1	4	0.013337	0.042113	0.986618	807	1	0.054548	0.34739	0.48831	0.999996	9291	2	0.054548	-1.87494
RBMS3	4	0.013348	0.042141	0.986618	808	2	-0.12012	0.78731	0.78766	0.999996	14975	1	-0.12012	-1.87458
PCDHGB7	4	0.013406	0.042267	0.986618	809	3	-0.17464	0.85966	0.85982	0.999996	16320	0	-0.17464	-1.8727
GPHB5	4	0.013414	0.042282	0.986618	810	3	-0.4078	0.97041	0.97052	0.999996	18488	0	-0.4078	-1.87244
ZNF749	4	0.01342	0.042294	0.986618	811	2	-0.057416	0.12828	0.25264	0.993956	4852	2	-0.057416	-1.87225
SNCB	4	0.013439	0.042338	0.986618	812	2	-0.073382	0.92267	0.92273	0.999996	17552	0	-0.073382	-1.87163
SLC35G6	4	0.013447	0.042351	0.986618	813	2	-0.07596	0.099798	0.21415	0.986532	4146	2	-0.07596	-1.87137
AGL	4	0.013521	0.042513	0.986618	814	3	-0.34379	0.67701	0.6988	0.999996	13232	1	-0.34379	-1.86899
RASSF3	4	0.013529	0.042532	0.986618	815	3	-0.13932	0.57043	0.63269	0.999996	12013	1	-0.13932	-1.86873
STAT1	4	0.013536	0.042553	0.986618	816	3	-0.17047	0.26124	0.39584	0.999996	7541	1	-0.17047	-1.86851
PGBD1	4	0.013541	0.042567	0.986618	817	2	-0.092336	0.73368	0.7411	0.999996	14056	1	-0.092336	-1.86835
ANXA9	4	0.013577	0.042648	0.986618	818	3	-0.28357	0.96585	0.96597	0.999996	18408	0	-0.28357	-1.8672
TBC1D16	4	0.013592	0.042684	0.986618	819	1	-0.024368	0.8097	0.80981	0.999996	15397	0	-0.024368	-1.86672
PSAPL1	4	0.013629	0.042756	0.986618	820	3	-0.20239	0.97217	0.97228	0.999996	18530	0	-0.20239	-1.86554
NIPBL	4	0.013638	0.042775	0.986618	821	3	-0.45494	0.32064	0.45972	0.999996	8741	1	-0.45494	-1.86525
APC2	4	0.013643	0.042786	0.986618	822	2	-0.14445	0.16599	0.29351	0.998152	5620	1	-0.14445	-1.86509
ISG20	4	0.013654	0.042815	0.986618	823	3	-0.19868	0.95502	0.95509	0.999996	18219	0	-0.19868	-1.86474
ARAP1	4	0.013746	0.043016	0.986618	824	2	0.13928	0.11975	0.24348	0.992603	4686	2	0.13928	-1.86182
XRCC6	4	0.013761	0.043048	0.986618	825	3	-0.40992	0.93914	0.93911	0.999996	17898	0	-0.40992	-1.86135
VWF	4	0.013785	0.043101	0.986618	826	2	-0.12801	0.86872	0.86879	0.999996	16486	0	-0.12801	-1.86059
MAGEE1	4	0.013797	0.043132	0.986618	827	3	-0.13508	0.97097	0.97108	0.999996	18505	0	-0.13508	-1.86022
CAPN9	4	0.0138	0.043139	0.986618	828	3	-0.37663	0.48391	0.58779	0.999996	11148	1	-0.37663	-1.86012
IL1RL2	4	0.013848	0.043247	0.986618	829	1	0.10026	0.25746	0.39173	0.999996	7462	2	0.10026	-1.85861
USP45	4	0.013924	0.043422	0.986618	830	3	-0.5013	0.44456	0.56905	0.999996	10825	1	-0.5013	-1.85624
KAT2A	4	0.013946	0.043471	0.986618	831	3	-0.2457	0.90785	0.90782	0.999996	17244	0	-0.2457	-1.85555
RPL36	4	0.01395	0.043475	0.986618	832	2	-0.84326	0.92987	0.92977	0.999996	17709	0	-0.84326	-1.85543
SAMD15	4	0.014001	0.043602	0.986618	833	2	-0.13749	0.87625	0.87632	0.999996	16635	0	-0.13749	-1.85384
STARD3NL	4	0.014001	0.043602	0.986618	834	1	-0.033896	0.95916	0.95921	0.999996	18297	0	-0.033896	-1.85384
TGIF2	4	0.014028	0.043667	0.986618	835	3	-0.20332	0.81544	0.81554	0.999996	15486	0	-0.20332	-1.853
ARID4B	4	0.014103	0.043848	0.986618	836	1	0.08557	0.2229	0.3547	0.999996	6740	2	0.08557	-1.85069
PAM16	4	0.014106	0.043853	0.986618	837	3	-0.46861	0.89123	0.89126	0.999996	16918	0	-0.46861	-1.8506
ARID4A	4	0.014112	0.043867	0.986618	838	3	-0.20501	0.97442	0.97455	0.999996	18567	0	-0.20501	-1.85041
ZKSCAN3	4	0.014113	0.043868	0.986618	839	3	-0.21674	0.81572	0.81581	0.999996	15493	0	-0.21674	-1.85038
OR4C6	4	0.014154	0.043969	0.986618	840	2	0.016304	0.16896	0.29675	0.998747	5673	2	0.016304	-1.84912
ADAM30	4	0.014206	0.044091	0.986618	841	2	0.10369	0.015789	0.048386	0.961704	960	2	0.10369	-1.84753
FCRLB	4	0.014211	0.044105	0.986618	842	3	-0.31872	0.84841	0.84852	0.999996	16126	0	-0.31872	-1.84738
SIK2	4	0.014222	0.044133	0.986618	843	3	-0.14722	0.66109	0.688	0.999996	13041	1	-0.14722	-1.84704
LGR6	4	0.014308	0.044328	0.986618	844	1	-0.066967	0.56655	0.63056	0.999996	11966	1	-0.066967	-1.84442
KCNJ14	4	0.014324	0.044363	0.986618	845	3	-0.23479	0.85355	0.85366	0.999996	16215	0	-0.23479	-1.84394
DPYSL4	4	0.014335	0.044391	0.986618	846	3	-0.25299	0.98443	0.98455	0.999996	18772	0	-0.25299	-1.8436
SRSF10	4	0.014359	0.044439	0.986618	847	1	0.12812	0.089323	0.19493	0.986532	3761	3	0.12812	-1.84288
COG8	4	0.014381	0.044491	0.986618	848	2	-0.28166	0.5773	0.63656	0.999996	12079	1	-0.28166	-1.84221
APPBP2	4	0.014388	0.044506	0.986618	849	2	-0.16122	0.6834	0.70329	0.999996	13331	1	-0.16122	-1.842
STKLD1	4	0.01441	0.04456	0.986618	850	2	-0.07911	0.87154	0.87159	0.999996	16547	0	-0.07911	-1.84134
NEGR1	4	0.014414	0.044566	0.986618	851	3	-0.13659	0.1457	0.27161	0.993956	5211	1	-0.13659	-1.84122
HIST1H2BO	4	0.014461	0.044661	0.986618	852	1	-0.0036635	0.77665	0.77775	0.999996	14781	1	-0.0036635	-1.8398
TMEM239	4	0.014461	0.044661	0.986618	853	3	-0.21141	0.78173	0.78242	0.999996	14865	1	-0.21141	-1.8398
RFESD	4	0.014512	0.044779	0.986618	854	1	0.12675	0.020934	0.059564	0.966778	1174	3	0.12675	-1.83827
MLF1	4	0.014515	0.04479	0.986618	855	2	-0.13878	0.84546	0.84551	0.999996	16078	0	-0.13878	-1.83818
VEZF1	4	0.014537	0.044838	0.986618	856	2	-0.12226	0.67242	0.69565	0.999996	13184	1	-0.12226	-1.83753
C2CD2L	4	0.014563	0.044895	0.986618	857	1	0.17697	0.10773	0.22842	0.987502	4421	2	0.17697	-1.83675
FAM71F1	4	0.014572	0.044905	0.986618	858	3	-0.18922	0.78258	0.78322	0.999996	14891	1	-0.18922	-1.83648
BAG2	4	0.014594	0.044954	0.986618	859	2	-0.068654	0.59745	0.64803	0.999996	12295	1	-0.068654	-1.83583
SIGLEC5	4	0.014627	0.045023	0.986618	860	3	-0.37189	0.9778	0.97794	0.999996	18631	0	-0.37189	-1.83484
DYNAP	4	0.014665	0.045105	0.986618	861	2	-0.020448	0.35859	0.50022	0.999996	9524	2	-0.020448	-1.83372
CRIPT	4	0.014708	0.045209	0.986618	862	3	-0.31094	0.97211	0.97221	0.999996	18527	0	-0.31094	-1.83245
P2RX4	4	0.014715	0.045219	0.986618	863	2	-0.0646	0.72668	0.73557	0.999996	13954	1	-0.0646	-1.83224
FAM13B	4	0.014716	0.045223	0.986618	864	2	-0.15185	0.28022	0.4163	0.999996	7905	2	-0.15185	-1.83221
TTYH2	4	0.014723	0.045236	0.986618	865	3	-0.16597	0.29183	0.42881	0.999996	8139	1	-0.16597	-1.832
SLC36A4	4	0.014768	0.045334	0.986618	866	2	-0.022572	0.31876	0.45772	0.999996	8697	2	-0.022572	-1.83068
ZNF138	4	0.014808	0.04542	0.986618	867	2	-0.18738	0.90142	0.90145	0.999996	17119	0	-0.18738	-1.8295
CDC42SE1	4	0.014819	0.045449	0.986618	868	3	-0.29091	0.30668	0.44481	0.999996	8443	1	-0.29091	-1.82918
GEM	4	0.01487	0.045561	0.986618	869	1	0.11125	0.067943	0.15465	0.986532	2968	3	0.11125	-1.82769
OR5B12	4	0.014913	0.04565	0.986618	870	3	-0.28692	0.47323	0.58268	0.999996	11063	1	-0.28692	-1.82643
DCUN1D4	4	0.014921	0.045664	0.986618	871	3	-0.29003	0.83014	0.83027	0.999996	15763	0	-0.29003	-1.8262
MAGEB1	4	0.014972	0.045776	0.986618	872	1	-0.02165	0.70983	0.72256	0.999996	13708	1	-0.02165	-1.82472
ZNF410	4	0.014988	0.045808	0.986618	873	3	-0.18487	0.82108	0.82119	0.999996	15590	0	-0.18487	-1.82426
SLC9A3R1	4	0.015005	0.04584	0.986618	874	3	-0.16759	0.90519	0.90514	0.999996	17190	0	-0.16759	-1.82376
AADAT	4	0.015017	0.045873	0.986618	875	2	-0.073106	0.094369	0.20422	0.986532	3939	2	-0.073106	-1.82342
CDH9	4	0.015023	0.045885	0.986618	876	2	-0.023764	0.23806	0.37095	0.999996	7045	2	-0.023764	-1.82324
FAM118A	4	0.015031	0.045898	0.986618	877	3	-0.2192	0.8628	0.86294	0.999996	16376	0	-0.2192	-1.82301
KIAA1033	4	0.015038	0.045916	0.986618	878	2	-0.017792	0.36467	0.50665	0.999996	9642	2	-0.017792	-1.82281
DHX40	4	0.015053	0.045955	0.986618	879	3	-0.30698	0.5493	0.6212	0.999996	11791	1	-0.30698	-1.82238
CDCP2	4	0.015074	0.046012	0.986618	880	2	0.021705	0.14075	0.26618	0.993956	5107	2	0.021705	-1.82177
NT5C3A	4	0.015115	0.046106	0.986618	881	3	-0.25839	0.94541	0.94546	0.999996	18022	0	-0.25839	-1.82059
GATAD2A	4	0.015125	0.046137	0.986618	882	2	-0.1462	0.41604	0.55615	0.999996	10571	1	-0.1462	-1.8203
SPOCK3	4	0.015176	0.046235	0.986618	883	1	0.01777	0.47102	0.58163	0.999996	11044	1	0.01777	-1.81884
REXO2	4	0.015194	0.046274	0.986618	884	3	-0.19899	0.11914	0.2428	0.991996	4676	1	-0.19899	-1.81833
PRMT7	4	0.015194	0.046276	0.986618	885	2	-0.22249	0.6972	0.71317	0.999996	13534	1	-0.22249	-1.81833
LLPH	4	0.015214	0.046325	0.986618	886	3	-0.32318	0.81124	0.81133	0.999996	15419	0	-0.32318	-1.81776
CEP44	4	0.015227	0.046354	0.986618	887	3	-0.18393	0.98844	0.98849	0.999996	18866	0	-0.18393	-1.81739
VPS37A	4	0.015241	0.046381	0.986618	888	3	-0.21248	0.92339	0.92343	0.999996	17574	0	-0.21248	-1.81699
SFRP5	4	0.015249	0.046398	0.986618	889	3	-0.25703	0.93414	0.93408	0.999996	17802	0	-0.25703	-1.81676
RFK	4	0.015299	0.046521	0.986618	890	2	-0.11516	0.59907	0.64899	0.999996	12314	1	-0.11516	-1.81534
MRPS2	4	0.015329	0.046587	0.986618	891	2	-0.048432	0.031415	0.081812	0.980459	1589	2	-0.048432	-1.81449
OR4D11	4	0.015329	0.046588	0.986618	892	2	-0.058342	0.76776	0.76971	0.999996	14612	1	-0.058342	-1.81449
GTF2IRD2	4	0.015358	0.046659	0.986618	893	3	-0.21372	0.13981	0.26513	0.993956	5084	1	-0.21372	-1.81367
CNTD1	4	0.015369	0.046684	0.986618	894	2	-0.2304	0.96863	0.96871	0.999996	18463	0	-0.2304	-1.81335
LMAN1L	4	0.015423	0.04679	0.986618	895	3	-0.3662	0.94331	0.94335	0.999996	17978	0	-0.3662	-1.81183
TBATA	4	0.015431	0.046806	0.986618	896	2	0.020294	0.12945	0.2539	0.993956	4869	2	0.020294	-1.81161
ZGRF1	4	0.015453	0.046861	0.986618	897	2	-0.1984	0.51446	0.60303	0.999996	11438	1	-0.1984	-1.81099
EHHADH	4	0.015469	0.046894	0.986618	898	3	-0.26859	0.13704	0.26221	0.993956	5030	1	-0.26859	-1.81054
SETSIP	4	0.015469	0.046894	0.986618	899	3	-0.22346	0.46302	0.57775	0.999996	10982	1	-0.22346	-1.81054
TRMT2B	4	0.015482	0.046932	0.986618	900	1	0.0042485	0.78952	0.78976	0.999996	15015	1	0.0042485	-1.81017
ZBTB9	4	0.015519	0.047012	0.986618	901	2	-0.048482	0.33395	0.47393	0.999996	9028	2	-0.048482	-1.80914
TDRD7	4	0.015533	0.04705	0.986618	902	1	-0.019538	0.64049	0.67454	0.999996	12785	1	-0.019538	-1.80874
LATS2	4	0.015585	0.047162	0.986618	903	2	-0.049488	0.53566	0.61392	0.999996	11648	1	-0.049488	-1.80729
TSR1	4	0.015636	0.047277	0.986618	904	2	-0.30525	0.63423	0.67051	0.999996	12702	1	-0.30525	-1.80587
KCNK4	4	0.015668	0.047341	0.986618	905	3	-0.19459	0.73001	0.73819	0.999996	14001	1	-0.19459	-1.80499
ZBTB41	4	0.015675	0.047361	0.986618	906	3	-0.30109	0.41687	0.55651	0.999996	10581	1	-0.30109	-1.80479
FARSA	4	0.015687	0.047383	0.986618	907	1	-0.014794	0.70672	0.7202	0.999996	13665	1	-0.014794	-1.80446
RWDD1	4	0.015732	0.047481	0.986618	908	2	0.0027938	0.085394	0.18763	0.986532	3625	2	0.0027938	-1.80322
RBPJL	4	0.015737	0.047488	0.986618	909	3	-0.1746	0.018058	0.053358	0.966778	1046	1	-0.1746	-1.80308
ZNF486	4	0.015744	0.047498	0.986618	910	3	-0.13079	0.94336	0.9434	0.999996	17982	0	-0.13079	-1.80288
MDM1	4	0.01576	0.047527	0.986618	911	3	-0.35298	0.4183	0.55715	0.999996	10596	1	-0.35298	-1.80244
NUDT15	4	0.015761	0.04753	0.986618	912	3	-0.17959	0.98792	0.98798	0.999996	18856	0	-0.17959	-1.80242
EIF4A1	4	0.015783	0.047575	0.986618	913	3	-0.55975	0.34463	0.48534	0.999996	9233	1	-0.55975	-1.80181
CDKN1C	4	0.015789	0.047586	0.986618	914	3	-0.16014	0.94644	0.94647	0.999996	18051	0	-0.16014	-1.80165
CC2D1B	4	0.015825	0.047672	0.986618	915	3	-0.1845	0.98198	0.98207	0.999996	18710	0	-0.1845	-1.80066
CEP57	4	0.01584	0.047703	0.986618	916	2	-0.11759	0.1433	0.26896	0.993956	5159	2	-0.11759	-1.80024
MROH6	4	0.015853	0.047735	0.986618	917	3	-0.1706	0.86757	0.86765	0.999996	16464	0	-0.1706	-1.79989
ATXN7L2	4	0.01586	0.047752	0.986618	918	3	-0.29716	0.54477	0.61875	0.999996	11745	1	-0.29716	-1.7997
NLGN2	4	0.015891	0.047826	0.986618	919	2	-0.094275	0.50112	0.59632	0.999996	11318	1	-0.094275	-1.79885
ALG8	4	0.015902	0.047846	0.986618	920	2	-0.24694	0.17156	0.29958	0.998747	5726	1	-0.24694	-1.79855
CLEC1A	4	0.015905	0.047851	0.986618	921	3	-0.1832	0.87335	0.87343	0.999996	16582	0	-0.1832	-1.79847
ABCA1	4	0.015939	0.047932	0.986618	922	2	-0.21775	0.69427	0.71101	0.999996	13495	1	-0.21775	-1.79754
KLHL11	4	0.015942	0.047937	0.986618	923	2	-0.080741	0.12257	0.24647	0.992603	4741	1	-0.080741	-1.79746
WFDC6	4	0.015944	0.047941	0.986618	924	3	-0.26331	0.95989	0.95995	0.999996	18309	0	-0.26331	-1.7974
SPATC1L	4	0.015951	0.047954	0.986618	925	3	-0.22426	0.97315	0.97329	0.999996	18547	0	-0.22426	-1.79721
TMEM203	4	0.01596	0.047977	0.986618	926	3	-0.15695	0.59241	0.64512	0.999996	12232	1	-0.15695	-1.79697
SRP54	4	0.016028	0.048128	0.986618	927	2	-0.30906	0.89489	0.89489	0.999996	16986	0	-0.30906	-1.79512
KIF21A	4	0.016031	0.048136	0.986618	928	3	-0.11766	0.95747	0.95754	0.999996	18259	0	-0.11766	-1.79504
CDX4	4	0.016044	0.048169	0.986618	929	3	-0.13979	0.95639	0.95643	0.999996	18244	0	-0.13979	-1.79469
TDO2	4	0.016047	0.048178	0.986618	930	3	-0.28081	0.11924	0.2429	0.991996	4680	1	-0.28081	-1.79461
ABO	4	0.016079	0.048249	0.986618	931	3	-0.22395	0.86397	0.86407	0.999996	16397	0	-0.22395	-1.79374
ZKSCAN7	4	0.016146	0.048398	0.986618	932	2	-0.096527	0.96529	0.9654	0.999996	18395	0	-0.096527	-1.79194
THOP1	4	0.016147	0.048401	0.986618	933	3	-0.21551	0.91756	0.91753	0.999996	17451	0	-0.21551	-1.79191
XPA	4	0.016162	0.04843	0.986618	934	2	-0.1973	0.48785	0.58971	0.999996	11182	1	-0.1973	-1.7915
MBOAT2	4	0.016185	0.048485	0.986618	935	3	-0.33986	0.9346	0.93454	0.999996	17816	0	-0.33986	-1.79089
NOMO2	4	0.016197	0.048515	0.986618	936	1	-0.00034918	0.85811	0.85828	0.999996	16289	0	-0.00034918	-1.79057
TMPRSS5	4	0.016248	0.04864	0.986618	937	2	-0.079363	0.62743	0.66623	0.999996	12623	1	-0.079363	-1.7892
PTP4A3	4	0.016252	0.048648	0.986618	938	3	-0.22754	0.79973	0.79977	0.999996	15218	1	-0.22754	-1.78909
PRKD2	4	0.01626	0.048665	0.986618	939	3	-0.11717	0.46591	0.57912	0.999996	11002	1	-0.11717	-1.78888
C3orf35	4	0.016274	0.048693	0.986618	940	3	-0.22498	0.56807	0.63137	0.999996	11989	1	-0.22498	-1.78851
WFDC12	4	0.01635	0.048863	0.986618	941	3	-0.19438	0.94906	0.94913	0.999996	18108	0	-0.19438	-1.78648
NFE2L3	4	0.016364	0.048895	0.986618	942	2	-0.05738	0.26988	0.40515	0.999996	7712	1	-0.05738	-1.78611
TOP1MT	4	0.016401	0.048986	0.986618	943	2	0.096051	0.022688	0.063294	0.97304	1239	2	0.096051	-1.78513
CCER2	4	0.016426	0.049036	0.986618	944	3	-0.22401	0.95322	0.95333	0.999996	18193	0	-0.22401	-1.78447
THUMPD1	4	0.016452	0.049095	0.986618	945	2	0.02123	0.14492	0.27075	0.993956	5190	2	0.02123	-1.78378
CSRP3	4	0.016492	0.049178	0.986618	946	2	-0.045587	0.77954	0.78042	0.999996	14837	1	-0.045587	-1.78273
IFRD1	4	0.016554	0.049295	0.986618	947	2	-0.12149	0.8495	0.84957	0.999996	16140	0	-0.12149	-1.7811
UBQLNL	4	0.016589	0.049376	0.986618	948	3	-0.17323	0.98739	0.98746	0.999996	18844	0	-0.17323	-1.78018
EPPIN	4	0.016628	0.049465	0.986618	949	2	-0.096929	0.28038	0.41647	0.999996	7909	2	-0.096929	-1.77916
S100A10	4	0.016631	0.049471	0.986618	950	3	-0.38066	0.86552	0.86565	0.999996	16425	0	-0.38066	-1.77908
RRP8	4	0.016631	0.049471	0.986618	951	2	-0.12443	0.60466	0.65232	0.999996	12374	1	-0.12443	-1.77908
ACTRT3	4	0.016631	0.049471	0.986618	952	3	-0.29237	0.74184	0.74774	0.999996	14186	1	-0.29237	-1.77908
KRT35	4	0.016666	0.049551	0.986618	953	2	-0.085103	0.41642	0.55631	0.999996	10574	1	-0.085103	-1.77817
CABYR	4	0.016707	0.049638	0.986618	954	2	-0.082139	0.29759	0.43505	0.999996	8266	1	-0.082139	-1.7771
OTUD6B	4	0.016728	0.04968	0.986618	955	3	-0.16217	0.98076	0.98085	0.999996	18689	0	-0.16217	-1.77656
IGFBP5	4	0.016758	0.04975	0.986618	956	3	-0.11213	0.29977	0.43745	0.999996	8308	1	-0.11213	-1.77578
ZXDB	4	0.016809	0.049865	0.986618	957	2	-0.030568	0.14964	0.27583	0.993956	5287	2	-0.030568	-1.77446
SH2D3A	4	0.016825	0.049901	0.986618	958	3	-0.12611	0.82934	0.82946	0.999996	15748	0	-0.12611	-1.77404
PRKG2	4	0.016829	0.04991	0.986618	959	3	-0.29196	0.95765	0.9577	0.999996	18262	0	-0.29196	-1.77394
CRMP1	4	0.01686	0.049979	0.986618	960	1	-0.029368	0.081693	0.18086	0.986532	3492	1	-0.029368	-1.77314
SMC3	4	0.016871	0.050001	0.986618	961	3	-1.1636	0.30889	0.44719	0.999996	8486	1	-1.1636	-1.77286
TSPYL6	4	0.016911	0.050097	0.986618	962	2	-0.036705	0.43838	0.56618	0.999996	10769	1	-0.036705	-1.77183
NTF4	4	0.016928	0.05014	0.986618	963	3	-0.2896	0.58874	0.64298	0.999996	12195	1	-0.2896	-1.77139
FAM47A	4	0.016937	0.050155	0.986618	964	3	-0.1571	0.85992	0.86009	0.999996	16325	0	-0.1571	-1.77116
CA14	4	0.016952	0.050185	0.986618	965	3	-0.16079	0.90768	0.90764	0.999996	17240	0	-0.16079	-1.77078
SPANXD	4	0.016956	0.050195	0.986618	966	3	-0.19177	0.82278	0.82286	0.999996	15623	0	-0.19177	-1.77068
FZR1	4	0.016962	0.050208	0.986618	967	3	-0.19723	0.75845	0.76161	0.999996	14458	1	-0.19723	-1.77052
C3orf56	4	0.016963	0.05021	0.986618	968	3	-0.16146	0.9527	0.95283	0.999996	18177	0	-0.16146	-1.7705
SPRR1A	4	0.01697	0.050222	0.986618	969	3	-0.15636	0.87782	0.87785	0.999996	16663	0	-0.15636	-1.77032
FAHD2A	4	0.016995	0.050277	0.986618	970	3	-0.21602	0.70748	0.72077	0.999996	13677	1	-0.21602	-1.76968
UBAP2L	4	0.017001	0.050287	0.986618	971	2	-0.096887	0.82022	0.82031	0.999996	15574	0	-0.096887	-1.76953
AMACR	4	0.017013	0.050317	0.986618	972	3	-0.16609	0.72046	0.73065	0.999996	13855	1	-0.16609	-1.76922
NPC2	4	0.017028	0.050351	0.986618	973	2	-0.13333	0.061911	0.14293	0.986532	2759	1	-0.13333	-1.76884
SLC28A3	4	0.01703	0.050354	0.986618	974	3	-0.14443	0.90483	0.90479	0.999996	17182	0	-0.14443	-1.76879
TRIM8	4	0.017054	0.050404	0.986618	975	2	-0.14672	0.29008	0.42695	0.999996	8099	2	-0.14672	-1.76817
PSME4	4	0.017064	0.050433	0.986618	976	1	0.11158	0.11541	0.23879	0.990081	4608	2	0.11158	-1.76792
TTC30A	4	0.017166	0.050652	0.988471	977	1	0.22308	0.0083367	0.028348	0.941204	557	3	0.22308	-1.76533
C6orf89	4	0.017217	0.050759	0.988471	978	1	-0.063386	0.90175	0.90176	0.999996	17123	0	-0.063386	-1.76404
FAM46A	4	0.017256	0.050846	0.988471	979	3	-0.37737	0.4843	0.58798	0.999996	11151	1	-0.37737	-1.76306
HBP1	4	0.017262	0.050855	0.988471	980	3	-0.14977	0.14304	0.26866	0.993956	5154	1	-0.14977	-1.76291
CES1	4	0.017268	0.050873	0.988471	981	1	-0.021126	0.40625	0.55139	0.999996	10476	1	-0.021126	-1.76276
ADPRHL1	4	0.017269	0.050875	0.988471	982	2	-0.10465	0.33147	0.47128	0.999996	8974	2	-0.10465	-1.76273
SEC61A1	4	0.0173	0.050938	0.988471	983	3	-0.31584	0.6084	0.65456	0.999996	12415	1	-0.31584	-1.76195
ADCK2	4	0.017323	0.050987	0.988471	984	2	-0.08376	0.28884	0.42559	0.999996	8073	2	-0.08376	-1.76138
TRIOBP	4	0.017339	0.051029	0.988471	985	3	-0.15166	0.84932	0.84941	0.999996	16137	0	-0.15166	-1.76098
KRT4	4	0.01737	0.051096	0.988471	986	2	-0.41172	0.83062	0.83077	0.999996	15770	0	-0.41172	-1.7602
SLC23A2	4	0.01737	0.051097	0.988471	987	3	-0.14584	0.52919	0.61058	0.999996	11589	1	-0.14584	-1.7602
DRD2	4	0.017421	0.05121	0.989134	988	2	-0.11276	0.84329	0.8434	0.999996	16034	0	-0.11276	-1.75893
ZUFSP	4	0.017431	0.051234	0.989134	989	2	-0.27081	0.98053	0.98066	0.999996	18686	0	-0.27081	-1.75868
RAD52	4	0.017493	0.051369	0.990733	990	3	-0.30038	0.97148	0.9716	0.999996	18516	0	-0.30038	-1.75714
HLA-DMB	4	0.017549	0.051494	0.991102	991	3	-0.22627	0.22229	0.35403	0.999996	6728	1	-0.22627	-1.75575
TTLL7	4	0.017574	0.051549	0.991102	992	3	-0.081874	0.35283	0.49406	0.999996	9415	1	-0.081874	-1.75513
ALDOC	4	0.017604	0.051611	0.991102	993	3	-0.15484	0.88003	0.88006	0.999996	16712	0	-0.15484	-1.75439
BMP6	4	0.017625	0.051652	0.991102	994	2	-0.065641	0.43481	0.56455	0.999996	10732	1	-0.065641	-1.75387
SHPRH	4	0.017676	0.051773	0.991102	995	1	0.09669	0.097483	0.20994	0.986532	4053	3	0.09669	-1.75262
SMCO4	4	0.017708	0.051849	0.991102	996	3	-0.24072	0.98284	0.98294	0.999996	18730	0	-0.24072	-1.75183
CXCL14	4	0.017727	0.051887	0.991102	997	2	0.0035895	0.83022	0.83036	0.999996	15765	0	0.0035895	-1.75136
PIK3R6	4	0.017746	0.051923	0.991102	998	3	-0.16749	0.23716	0.36997	0.999996	7025	1	-0.16749	-1.7509
SFXN3	4	0.017773	0.051976	0.991102	999	3	-0.25329	0.13713	0.26231	0.993956	5033	1	-0.25329	-1.75024
OR4K13	4	0.017778	0.051989	0.991102	1000	2	-0.076475	0.072355	0.16312	0.986532	3143	1	-0.076475	-1.75012
AEN	4	0.017829	0.052105	0.991102	1001	3	-0.11831	0.9753	0.97544	0.999996	18582	0	-0.11831	-1.74887
MYO7B	4	0.017871	0.052181	0.991102	1002	3	-0.12249	0.87493	0.87498	0.999996	16609	0	-0.12249	-1.74785
LIN52	4	0.01788	0.052197	0.991102	1003	2	0.07828	0.82218	0.82227	0.999996	15608	0	0.07828	-1.74763
COMMD7	4	0.017921	0.05228	0.991102	1004	2	-0.14242	0.22856	0.36073	0.999996	6862	1	-0.14242	-1.74664
NCEH1	4	0.017931	0.052303	0.991102	1005	2	-0.088014	0.80853	0.80861	0.999996	15375	0	-0.088014	-1.7464
RFX5	4	0.017937	0.052317	0.991102	1006	2	-0.12264	0.74705	0.75209	0.999996	14265	1	-0.12264	-1.74625
ZFHX2	4	0.017961	0.052372	0.991102	1007	3	-0.25293	0.2549	0.38899	0.999996	7424	1	-0.25293	-1.74567
PRICKLE1	4	0.018003	0.052467	0.991102	1008	3	-0.20703	0.97595	0.9761	0.999996	18592	0	-0.20703	-1.74466
CDKL5	4	0.018071	0.052608	0.991102	1009	3	-0.11949	0.27849	0.41446	0.999996	7873	1	-0.11949	-1.74302
CIRBP	4	0.018083	0.052633	0.991102	1010	2	-0.087285	0.90381	0.90379	0.999996	17159	0	-0.087285	-1.74273
SLC10A7	4	0.018094	0.052662	0.991102	1011	2	-0.25693	0.63239	0.66931	0.999996	12682	1	-0.25693	-1.74247
SLURP1	4	0.018109	0.052692	0.991102	1012	3	-0.14501	0.90021	0.90024	0.999996	17086	0	-0.14501	-1.74211
ARHGAP25	4	0.018118	0.052707	0.991102	1013	3	-0.22426	0.8782	0.87825	0.999996	16671	0	-0.22426	-1.74189
LPPR5	4	0.018181	0.052838	0.991102	1014	3	-0.21808	0.49406	0.59273	0.999996	11238	1	-0.21808	-1.74038
YARS	4	0.018232	0.052957	0.991102	1015	3	-0.38811	0.59343	0.64572	0.999996	12246	1	-0.38811	-1.73917
C17orf98	4	0.018236	0.052966	0.991102	1016	2	-0.020845	0.79379	0.79386	0.999996	15108	1	-0.020845	-1.73907
METTL21B	4	0.018291	0.053088	0.991102	1017	3	-0.25123	0.87259	0.87265	0.999996	16567	0	-0.25123	-1.73776
PSMD9	4	0.018321	0.053151	0.991102	1018	3	-0.13284	0.63598	0.67164	0.999996	12718	1	-0.13284	-1.73705
CTAG1B	4	0.018348	0.053209	0.991102	1019	3	-0.32732	0.90404	0.90401	0.999996	17166	0	-0.32732	-1.73641
CNOT11	4	0.018386	0.053293	0.991102	1020	3	-0.29129	0.95665	0.95671	0.999996	18247	0	-0.29129	-1.73551
NEXN	4	0.018389	0.053298	0.991102	1021	2	-0.04661	0.081063	0.17967	0.986532	3468	2	-0.04661	-1.73544
NEURL4	4	0.01844	0.053407	0.991102	1022	1	-0.018931	0.77531	0.7765	0.999996	14762	1	-0.018931	-1.73424
RAPGEFL1	4	0.01845	0.05343	0.991102	1023	2	-0.14375	0.53899	0.61569	0.999996	11686	1	-0.14375	-1.734
CDKN2AIPNL	4	0.018491	0.053519	0.991102	1024	1	0.1149	0.066236	0.15134	0.986532	2910	3	0.1149	-1.73304
SELT	4	0.018521	0.053581	0.991102	1025	2	-0.16882	0.60926	0.65506	0.999996	12432	1	-0.16882	-1.73234
BAGE2	4	0.018542	0.053623	0.991102	1026	1	-0.11952	0.55603	0.62482	0.999996	11861	1	-0.11952	-1.73184
IFT46	4	0.018593	0.053742	0.991102	1027	3	-0.15026	0.45956	0.57612	0.999996	10950	1	-0.15026	-1.73065
SLC1A2	4	0.018617	0.053787	0.991102	1028	2	-0.16018	0.42137	0.55851	0.999996	10623	1	-0.16018	-1.73009
KDM6A	4	0.018666	0.053893	0.991102	1029	3	-0.23924	0.66425	0.69012	0.999996	13075	1	-0.23924	-1.72895
UQCRB	4	0.018672	0.053907	0.991102	1030	2	0.0080655	0.033761	0.086751	0.980568	1682	2	0.0080655	-1.72881
CCDC138	4	0.018695	0.053957	0.991102	1031	2	-0.20604	0.78788	0.78818	0.999996	14984	1	-0.20604	-1.72827
MTF2	4	0.018728	0.054031	0.991102	1032	2	-0.11406	0.68104	0.70166	0.999996	13292	1	-0.11406	-1.72751
TUBB4B	4	0.018746	0.054073	0.991102	1033	1	0.61966	0.056043	0.13141	0.985358	2548	2	0.61966	-1.72709
HNRNPC	4	0.018757	0.054104	0.991102	1034	3	-1.8627	0.42672	0.56092	0.999996	10676	1	-1.8627	-1.72684
PAGE5	4	0.018778	0.054143	0.991102	1035	3	-0.14254	0.76986	0.77159	0.999996	14653	1	-0.14254	-1.72635
ITGBL1	4	0.018782	0.054155	0.991102	1036	3	-0.18153	0.9116	0.91157	0.999996	17313	0	-0.18153	-1.72626
AQP8	4	0.018797	0.054191	0.991102	1037	2	-0.037703	0.5374	0.61483	0.999996	11668	1	-0.037703	-1.72591
LRRC47	4	0.018924	0.054486	0.991102	1038	3	-0.20313	0.48645	0.58904	0.999996	11167	1	-0.20313	-1.72299
C12orf42	4	0.018924	0.054486	0.991102	1039	1	0.1701	0.081835	0.18111	0.986532	3500	3	0.1701	-1.72299
IFI35	4	0.018932	0.054507	0.991102	1040	3	-0.21835	0.95056	0.95068	0.999996	18133	0	-0.21835	-1.7228
TXLNA	4	0.018962	0.054583	0.991102	1041	3	-0.36373	0.97032	0.97043	0.999996	18485	0	-0.36373	-1.72212
RAPH1	4	0.018993	0.05465	0.991102	1042	2	-0.095956	0.22259	0.35436	0.999996	6736	2	-0.095956	-1.72141
METTL2B	4	0.019	0.054666	0.991102	1043	2	-0.096336	0.39627	0.54057	0.999996	10281	2	-0.096336	-1.72125
CCDC43	4	0.019017	0.0547	0.991102	1044	3	-0.23054	0.98301	0.98311	0.999996	18740	0	-0.23054	-1.72086
CLEC4M	4	0.019051	0.054777	0.991102	1045	2	-0.10642	0.55743	0.62557	0.999996	11874	1	-0.10642	-1.72008
SLC30A7	4	0.019102	0.054884	0.991102	1046	2	-0.066715	0.72347	0.73299	0.999996	13900	1	-0.066715	-1.71892
PLEKHF1	4	0.019109	0.054902	0.991102	1047	3	-0.22631	0.90058	0.90062	0.999996	17094	0	-0.22631	-1.71876
ATP1B4	4	0.019138	0.054963	0.991102	1048	3	-0.13901	0.85008	0.85015	0.999996	16149	0	-0.13901	-1.7181
ANXA7	4	0.019153	0.054995	0.991102	1049	2	-0.12435	0.53441	0.61326	0.999996	11638	1	-0.12435	-1.71776
C1GALT1	4	0.01917	0.05504	0.991102	1050	2	-0.24239	0.43875	0.56636	0.999996	10772	1	-0.24239	-1.71738
SEMG2	4	0.019204	0.055119	0.991102	1051	1	0.060648	0.3682	0.51039	0.999996	9714	2	0.060648	-1.71661
ANKRD50	4	0.019266	0.05526	0.991102	1052	3	-0.15027	0.42976	0.56229	0.999996	10700	1	-0.15027	-1.71521
C11orf97	4	0.019286	0.055307	0.991102	1053	3	-0.21452	0.64079	0.67474	0.999996	12790	1	-0.21452	-1.71476
ZNF609	4	0.01934	0.055433	0.991102	1054	2	-0.050415	0.18518	0.31422	0.999496	6006	2	-0.050415	-1.71354
RNF168	4	0.019408	0.05558	0.991102	1055	3	-0.27642	0.96583	0.96595	0.999996	18406	0	-0.27642	-1.71202
PSMF1	4	0.019445	0.055669	0.991102	1056	3	-0.22851	0.93659	0.93654	0.999996	17854	0	-0.22851	-1.71119
FANCD2	4	0.019458	0.055702	0.991102	1057	3	-0.19629	0.91898	0.91899	0.999996	17481	0	-0.19629	-1.7109
ZCCHC11	4	0.019509	0.055805	0.991102	1058	1	0.14885	0.058948	0.13709	0.986532	2644	2	0.14885	-1.70976
B3GNT4	4	0.019527	0.055852	0.991102	1059	3	-0.19637	0.85523	0.85534	0.999996	16241	0	-0.19637	-1.70936
PTPN1	4	0.01956	0.055932	0.991102	1060	2	-0.038017	0.16509	0.29254	0.997619	5603	2	-0.038017	-1.70863
CUL1	4	0.019611	0.056022	0.991102	1061	2	-0.2761	0.32792	0.46751	0.999996	8897	1	-0.2761	-1.7075
CUZD1	4	0.019636	0.056068	0.991102	1062	3	-0.27179	0.97272	0.97283	0.999996	18538	0	-0.27179	-1.70695
CD180	4	0.019657	0.056104	0.991102	1063	2	-0.10794	0.3481	0.48907	0.999996	9300	1	-0.10794	-1.70648
ZNF594	4	0.019662	0.056112	0.991102	1064	1	-0.24128	0.93195	0.93191	0.999996	17749	0	-0.24128	-1.70637
APOA5	4	0.019681	0.056156	0.991102	1065	3	-0.15719	0.897	0.897	0.999996	17027	0	-0.15719	-1.70595
DDX46	4	0.019693	0.056184	0.991102	1066	3	-0.48464	0.96823	0.96831	0.999996	18456	0	-0.48464	-1.70569
SLC15A1	4	0.019698	0.056198	0.991102	1067	2	-0.11235	0.71354	0.72528	0.999996	13755	1	-0.11235	-1.70558
CISD2	4	0.019713	0.056227	0.991102	1068	1	0.012307	0.31059	0.44908	0.999996	8520	2	0.012307	-1.70525
TCP11L1	4	0.019714	0.05623	0.991102	1069	2	0.017348	0.1215	0.24534	0.992603	4722	2	0.017348	-1.70523
PYCR1	4	0.019739	0.056289	0.991102	1070	3	-0.20752	0.96478	0.9649	0.999996	18386	0	-0.20752	-1.70467
RER1	4	0.019788	0.056382	0.991102	1071	2	-0.10736	0.28019	0.41628	0.999996	7903	1	-0.10736	-1.7036
SWSAP1	4	0.019809	0.056421	0.991102	1072	3	-0.18481	0.46307	0.57778	0.999996	10983	1	-0.18481	-1.70314
PRDX6	4	0.019815	0.056435	0.991102	1073	2	0.0076495	0.22712	0.35921	0.999996	6838	2	0.0076495	-1.70301
MAP2K5	4	0.019852	0.056516	0.991102	1074	3	-0.2331	0.93598	0.93591	0.999996	17846	0	-0.2331	-1.7022
CISD1	4	0.0199	0.056627	0.991102	1075	3	-0.2856	0.75732	0.76064	0.999996	14440	1	-0.2856	-1.70115
WI2-2373I1.2	4	0.019911	0.056651	0.991102	1076	2	-0.0097596	0.26552	0.40053	0.999996	7628	2	-0.0097596	-1.70091
ATXN7L3	4	0.019916	0.056658	0.991102	1077	2	-0.18688	0.8348	0.83492	0.999996	15862	0	-0.18688	-1.7008
TMPO	4	0.019961	0.056736	0.991102	1078	2	-0.086061	0.72659	0.73548	0.999996	13952	1	-0.086061	-1.69982
VPS26A	4	0.019967	0.056757	0.991102	1079	2	-0.10014	0.066629	0.15212	0.986532	2928	1	-0.10014	-1.69969
STAG2	4	0.019992	0.056808	0.991102	1080	3	-0.2364	0.98272	0.98282	0.999996	18727	0	-0.2364	-1.69914
FAM177B	4	0.020018	0.056861	0.991102	1081	2	-0.11591	0.87223	0.8723	0.999996	16559	0	-0.11591	-1.69858
PCDH7	4	0.020043	0.056918	0.991102	1082	2	-0.1968	0.95522	0.95527	0.999996	18226	0	-0.1968	-1.69804
IMPDH2	4	0.020051	0.056942	0.991102	1083	2	-0.13699	0.39133	0.53521	0.999996	10190	1	-0.13699	-1.69786
IFI30	4	0.020068	0.05698	0.991102	1084	2	-0.35261	0.93943	0.93942	0.999996	17908	0	-0.35261	-1.6975
DEFB103A	4	0.020069	0.056982	0.991102	1085	2	-0.068564	0.94488	0.94494	0.999996	18013	0	-0.068564	-1.69747
LYPD6B	4	0.020081	0.057005	0.991102	1086	3	-0.15856	0.54147	0.617	0.999996	11706	1	-0.15856	-1.69721
FBN1	4	0.020117	0.05708	0.991102	1087	2	-0.1541	0.45216	0.57258	0.999996	10877	1	-0.1541	-1.69644
CLDND2	4	0.02012	0.057087	0.991102	1088	1	0.067804	0.089719	0.19563	0.986532	3777	3	0.067804	-1.69637
ZNF620	4	0.020171	0.057193	0.991102	1089	2	-0.03957	0.76514	0.76735	0.999996	14561	1	-0.03957	-1.69527
RGMB	4	0.020187	0.057225	0.991102	1090	3	-0.19418	0.96743	0.96752	0.999996	18438	0	-0.19418	-1.69493
GOLGB1	4	0.020206	0.057261	0.991102	1091	3	-0.18836	0.96058	0.96066	0.999996	18320	0	-0.18836	-1.69452
ITGA1	4	0.020218	0.057294	0.991102	1092	3	-0.26968	0.95115	0.95128	0.999996	18144	0	-0.26968	-1.69426
SLK	4	0.020222	0.0573	0.991102	1093	2	-0.19306	0.044311	0.10814	0.982021	2088	1	-0.19306	-1.69418
FGF23	4	0.020229	0.057321	0.991102	1094	3	-0.26593	0.95784	0.95788	0.999996	18269	0	-0.26593	-1.69403
PRY	4	0.020229	0.057321	0.991102	1095	3	-0.30483	0.85297	0.85305	0.999996	16203	0	-0.30483	-1.69403
ZNF718	4	0.020299	0.057473	0.991102	1096	3	-0.21307	0.91522	0.91518	0.999996	17401	0	-0.21307	-1.69253
PTPRF	4	0.020323	0.057521	0.991102	1097	1	0.039709	0.24954	0.38324	0.999996	7301	2	0.039709	-1.69201
ITM2C	4	0.020332	0.057539	0.991102	1098	2	-0.15247	0.93107	0.931	0.999996	17729	0	-0.15247	-1.69182
GATSL3	4	0.020374	0.057639	0.991102	1099	2	-0.11553	0.75738	0.7607	0.999996	14443	1	-0.11553	-1.69092
ZNF766	4	0.020394	0.057681	0.991102	1100	3	-0.20802	0.7843	0.78481	0.999996	14921	1	-0.20802	-1.6905
RIMBP3	4	0.020398	0.057688	0.991102	1101	3	-0.12331	0.64521	0.67755	0.999996	12836	1	-0.12331	-1.69041
ATG9A	4	0.02044	0.057787	0.991102	1102	2	-0.41652	0.14235	0.26793	0.993956	5137	1	-0.41652	-1.68952
CDK17	4	0.020476	0.057864	0.991102	1103	1	0.10509	0.10449	0.22253	0.987119	4298	2	0.10509	-1.68875
ZNF570	4	0.020527	0.057962	0.991102	1104	1	0.00049031	0.49248	0.59197	0.999996	11224	1	0.00049031	-1.68767
RAB3IP	4	0.020565	0.058042	0.991102	1105	3	-0.33315	0.71861	0.72922	0.999996	13829	1	-0.33315	-1.68687
DRP2	4	0.020578	0.058071	0.991102	1106	1	-0.05574	0.94714	0.94718	0.999996	18073	0	-0.05574	-1.6866
MSC	4	0.020581	0.058081	0.991102	1107	3	-0.2473	0.72473	0.73398	0.999996	13920	1	-0.2473	-1.68653
TBC1D3H	4	0.020621	0.058164	0.991102	1108	3	-0.56322	0.98649	0.98656	0.999996	18821	0	-0.56322	-1.68569
C4orf33	4	0.020635	0.058183	0.991102	1109	3	-0.21266	0.98468	0.98479	0.999996	18779	0	-0.21266	-1.6854
RNASEL	4	0.020679	0.058276	0.991102	1110	1	-0.038333	0.81587	0.81596	0.999996	15497	0	-0.038333	-1.68447
PDK4	4	0.020682	0.058281	0.991102	1111	2	-0.1544	0.87627	0.87634	0.999996	16636	0	-0.1544	-1.68441
SLAIN2	4	0.020761	0.05845	0.991102	1112	3	-0.1892	0.93058	0.93048	0.999996	17719	0	-0.1892	-1.68275
NMNAT2	4	0.020781	0.058496	0.991102	1113	3	-0.1354	0.92798	0.92794	0.999996	17669	0	-0.1354	-1.68233
ATPIF1	4	0.020803	0.058548	0.991102	1114	3	-0.1349	0.71306	0.72497	0.999996	13747	1	-0.1349	-1.68187
MYADM	4	0.020883	0.05871	0.991102	1115	1	-0.019221	0.20648	0.33707	0.999996	6413	1	-0.019221	-1.68021
NCL	4	0.020912	0.058767	0.991102	1116	2	-0.73887	0.98062	0.98074	0.999996	18687	0	-0.73887	-1.6796
OSGIN1	4	0.020931	0.058812	0.991102	1117	3	-0.22703	0.70606	0.71969	0.999996	13656	1	-0.22703	-1.67921
EIF3J	4	0.020934	0.058818	0.991102	1118	2	-0.10552	0.7862	0.78661	0.999996	14952	1	-0.10552	-1.67915
ACBD7	4	0.020984	0.058924	0.991102	1119	2	-0.10828	0.84681	0.84692	0.999996	16101	0	-0.10828	-1.67811
ABLIM3	4	0.020994	0.058944	0.991102	1120	3	-0.14157	0.74952	0.75409	0.999996	14303	1	-0.14157	-1.6779
OTUD6A	4	0.021035	0.059038	0.991102	1121	2	-0.11702	0.13852	0.26378	0.993956	5057	2	-0.11702	-1.67706
BPIFB3	4	0.021089	0.059143	0.991102	1122	3	-0.16388	0.36136	0.50314	0.999996	9581	1	-0.16388	-1.67594
CDC42SE2	4	0.021136	0.059248	0.991102	1123	3	-0.14624	0.44306	0.56838	0.999996	10814	1	-0.14624	-1.67498
EFCAB3	4	0.021137	0.05925	0.991102	1124	1	0.072776	0.1203	0.24406	0.992603	4697	2	0.072776	-1.67496
CCDC60	4	0.021176	0.059342	0.991102	1125	3	-0.17677	0.57251	0.63386	0.999996	12036	1	-0.17677	-1.67416
STRA6	4	0.021176	0.059342	0.991102	1126	3	-0.11405	0.96972	0.96981	0.999996	18470	0	-0.11405	-1.67416
SLC52A3	4	0.021188	0.059366	0.991102	1127	2	-0.063631	0.86657	0.86667	0.999996	16448	0	-0.063631	-1.67391
CHIC1	4	0.021199	0.059393	0.991102	1128	3	-0.25229	0.77452	0.77577	0.999996	14743	1	-0.25229	-1.67368
AGPS	4	0.021233	0.059459	0.991102	1129	3	-0.31282	0.43651	0.56531	0.999996	10755	1	-0.31282	-1.67299
ZNF645	4	0.021239	0.059469	0.991102	1130	1	0.098572	0.32094	0.46007	0.999996	8748	2	0.098572	-1.67287
CYP2C8	4	0.021271	0.059543	0.991102	1131	2	-0.13957	0.724	0.73343	0.999996	13908	1	-0.13957	-1.67221
ABHD12	4	0.021289	0.059577	0.991102	1132	3	-0.17457	0.88105	0.88107	0.999996	16728	0	-0.17457	-1.67184
NUDT3	4	0.021289	0.059578	0.991102	1133	3	-0.13384	0.80729	0.80736	0.999996	15356	0	-0.13384	-1.67184
TTLL4	4	0.0213	0.059599	0.991102	1134	2	-0.12637	0.10663	0.22641	0.987119	4377	1	-0.12637	-1.67162
RAB20	4	0.02134	0.059686	0.991102	1135	2	-0.10451	0.54351	0.61808	0.999996	11730	1	-0.10451	-1.67081
C7orf26	4	0.021378	0.059769	0.991102	1136	3	-0.47385	0.78178	0.78248	0.999996	14867	1	-0.47385	-1.67003
MED21	4	0.021391	0.059795	0.991102	1137	2	-0.1481	0.89657	0.89659	0.999996	17018	0	-0.1481	-1.66977
SACM1L	4	0.021398	0.059806	0.991102	1138	2	-0.0021024	0.33415	0.47415	0.999996	9031	1	-0.0021024	-1.66963
SMIM10L1	4	0.021442	0.059913	0.991102	1139	2	-0.12503	0.74777	0.75267	0.999996	14277	1	-0.12503	-1.66873
NUAK1	4	0.021472	0.059976	0.991102	1140	3	-0.13753	0.1501	0.27632	0.993956	5299	1	-0.13753	-1.66813
CDK5RAP3	4	0.021489	0.060026	0.991102	1141	3	-0.17144	0.73276	0.74036	0.999996	14040	1	-0.17144	-1.66778
NCOR2	4	0.021493	0.060032	0.991102	1142	1	0.098898	0.14593	0.27186	0.993956	5217	2	0.098898	-1.6677
SMEK2	4	0.021496	0.060041	0.991102	1143	3	-0.24308	0.90454	0.90451	0.999996	17175	0	-0.24308	-1.66764
TAS2R1	4	0.021515	0.060077	0.991102	1144	3	-0.15907	0.73645	0.74336	0.999996	14097	1	-0.15907	-1.66726
PDS5A	4	0.021594	0.060248	0.991102	1145	3	-0.46201	0.23648	0.36926	0.999996	7012	1	-0.46201	-1.66567
MLF2	4	0.02164	0.060344	0.991102	1146	3	-0.12128	0.52424	0.60804	0.999996	11539	1	-0.12128	-1.66474
ASB3	4	0.021645	0.060356	0.991102	1147	2	-0.27222	0.43889	0.56643	0.999996	10773	1	-0.27222	-1.66464
TCEB3	4	0.02167	0.060418	0.991102	1148	3	-0.16912	0.95329	0.9534	0.999996	18195	0	-0.16912	-1.66414
OARD1	4	0.021696	0.06048	0.991102	1149	2	-0.074667	0.79178	0.79194	0.999996	15065	1	-0.074667	-1.66362
MYL6B	4	0.021722	0.060526	0.991102	1150	3	-0.18293	0.59173	0.6447	0.999996	12224	1	-0.18293	-1.6631
WASF1	4	0.021747	0.060578	0.991102	1151	3	-0.14653	0.73029	0.73841	0.999996	14006	1	-0.14653	-1.6626
ARHGEF38	4	0.021773	0.060635	0.991102	1152	2	-0.16169	0.92436	0.92436	0.999996	17602	0	-0.16169	-1.66208
ELMO3	4	0.021786	0.060663	0.991102	1153	3	-0.16773	0.088554	0.19354	0.986532	3732	1	-0.16773	-1.66182
ZC3H4	4	0.021798	0.060681	0.991102	1154	1	0.067768	0.32923	0.4689	0.999996	8928	2	0.067768	-1.66158
INSRR	4	0.021812	0.060717	0.991102	1155	3	-0.2035	0.55566	0.62462	0.999996	11856	1	-0.2035	-1.6613
CYP26B1	4	0.021841	0.060778	0.991102	1156	2	-0.094523	0.31531	0.45404	0.999996	8619	2	-0.094523	-1.66073
AFMID	4	0.021875	0.060844	0.991102	1157	3	-0.19098	0.43731	0.56567	0.999996	10761	1	-0.19098	-1.66005
MTRNR2L1	2	0.021897	0.04055	0.986618	1158	2	-0.14881	0.9781	0.97799	0.999996	18638	0	-0.14881	-1.65962
PPAP2A	4	0.021899	0.060904	0.991102	1159	1	0.040842	0.80753	0.80763	0.999996	15360	0	0.040842	-1.65958
ZCCHC13	4	0.021901	0.060911	0.991102	1160	3	-0.17669	0.97147	0.9716	0.999996	18515	0	-0.17669	-1.65954
DTNB	4	0.02195	0.06101	0.991102	1161	2	-0.14684	0.13008	0.2546	0.993956	4882	1	-0.14684	-1.65857
CERS3	4	0.021985	0.061085	0.991102	1162	3	-0.27422	0.67223	0.69553	0.999996	13180	1	-0.27422	-1.65787
VPS53	4	0.021996	0.061105	0.991102	1163	2	-0.25071	0.16612	0.29363	0.998152	5622	1	-0.25071	-1.65766
SPAG17	4	0.022016	0.06116	0.991102	1164	3	-0.15053	0.66534	0.69086	0.999996	13093	1	-0.15053	-1.65726
GIPC2	4	0.022022	0.061169	0.991102	1165	2	0.017534	0.11314	0.2364	0.989157	4566	2	0.017534	-1.65714
UBE2T	4	0.022025	0.061173	0.991102	1166	3	-0.15938	0.79447	0.79452	0.999996	15121	1	-0.15938	-1.65708
CAB39L	4	0.022042	0.061205	0.991102	1167	3	-0.19998	0.68117	0.70176	0.999996	13294	1	-0.19998	-1.65675
KRTAP2-3	4	0.022052	0.061223	0.991102	1168	2	-0.075286	0.71248	0.72452	0.999996	13739	1	-0.075286	-1.65655
LSM10	4	0.022068	0.061263	0.991102	1169	3	-0.19792	0.4981	0.59478	0.999996	11279	1	-0.19792	-1.65624
PRR9	4	0.022099	0.061323	0.991102	1170	3	-0.14349	0.75976	0.76272	0.999996	14481	1	-0.14349	-1.65563
GAL3ST1	4	0.022116	0.061359	0.991102	1171	2	-0.16291	0.65716	0.6854	0.999996	12986	1	-0.16291	-1.65529
SLC51B	4	0.022153	0.06143	0.991102	1172	1	0.029903	0.16349	0.29082	0.996549	5577	2	0.029903	-1.65457
MBD3L3	4	0.022162	0.061447	0.991102	1173	3	-0.18825	0.53624	0.61421	0.999996	11655	1	-0.18825	-1.65439
SLC16A3	4	0.022179	0.061483	0.991102	1174	3	-0.17047	0.38787	0.53154	0.999996	10124	1	-0.17047	-1.65406
ACSL1	4	0.022204	0.061534	0.991102	1175	3	-0.21148	0.8961	0.89612	0.999996	17010	0	-0.21148	-1.65357
UBA7	4	0.022205	0.061539	0.991102	1176	3	-0.24125	0.19359	0.32329	0.999996	6171	1	-0.24125	-1.65355
CEACAM1	4	0.022247	0.061639	0.991102	1177	3	-0.16875	0.95182	0.95194	0.999996	18157	0	-0.16875	-1.65273
GTF2IRD2B	4	0.022255	0.061655	0.991102	1178	1	0.12394	0.067417	0.15367	0.986532	2951	3	0.12394	-1.65257
MED6	4	0.022264	0.061672	0.991102	1179	3	-0.54313	0.70811	0.72123	0.999996	13688	1	-0.54313	-1.6524
TMEM95	4	0.022289	0.061723	0.991102	1180	2	-0.0037689	0.0022093	0.0079556	0.915891	162	2	-0.0037689	-1.65191
C16orf13	4	0.022306	0.061757	0.991102	1181	2	-0.1348	0.89618	0.89621	0.999996	17012	0	-0.1348	-1.65158
RIMS4	4	0.022356	0.061859	0.991102	1182	2	-0.090857	0.68274	0.70281	0.999996	13322	1	-0.090857	-1.65061
GPR152	4	0.022405	0.06195	0.991102	1183	3	-0.26052	0.98542	0.98551	0.999996	18800	0	-0.26052	-1.64966
CSNK2A1	4	0.022407	0.061956	0.991102	1184	2	-0.093441	0.89953	0.89954	0.999996	17072	0	-0.093441	-1.64962
PPP1R32	4	0.022427	0.062	0.991102	1185	3	-0.20809	0.74573	0.75097	0.999996	14245	1	-0.20809	-1.64923
TNFRSF13B	4	0.022427	0.062002	0.991102	1186	3	-0.2846	0.98263	0.98273	0.999996	18722	0	-0.2846	-1.64923
FCGR3A	4	0.022458	0.062064	0.991102	1187	2	-0.12257	0.85543	0.85556	0.999996	16246	0	-0.12257	-1.64863
ZNF556	4	0.022462	0.062074	0.991102	1188	3	-0.18183	0.97898	0.97912	0.999996	18655	0	-0.18183	-1.64855
SET	4	0.022486	0.062124	0.991102	1189	3	-0.22647	0.93077	0.93067	0.999996	17723	0	-0.22647	-1.64809
APBA2	4	0.022509	0.062171	0.991102	1190	1	-0.061137	0.22264	0.3544	0.999996	6737	1	-0.061137	-1.64764
KCND2	4	0.022524	0.06221	0.991102	1191	3	-0.16816	0.96757	0.96766	0.999996	18444	0	-0.16816	-1.64735
FERMT1	4	0.022559	0.062295	0.991102	1192	1	-0.011993	0.24359	0.37683	0.999996	7165	1	-0.011993	-1.64668
HIP1	4	0.022594	0.062374	0.991102	1193	3	-0.2145	0.72555	0.73462	0.999996	13936	1	-0.2145	-1.64601
FAM114A2	4	0.022608	0.0624	0.991102	1194	3	-0.16478	0.89598	0.89599	0.999996	17007	0	-0.16478	-1.64574
MTRF1L	4	0.022627	0.062446	0.991102	1195	2	-0.14393	0.73624	0.74319	0.999996	14092	1	-0.14393	-1.64537
ATP1B1	4	0.022636	0.062459	0.991102	1196	2	-0.058283	0.72982	0.73805	0.999996	13999	1	-0.058283	-1.6452
CDKN2AIP	4	0.022639	0.062468	0.991102	1197	3	-0.13625	0.98204	0.98212	0.999996	18711	0	-0.13625	-1.64514
RPA3	4	0.022661	0.062519	0.991102	1198	3	-1.3514	0.93792	0.93789	0.999996	17878	0	-1.3514	-1.64472
TUSC5	4	0.022696	0.062586	0.991102	1199	3	-0.14822	0.69301	0.71008	0.999996	13477	1	-0.14822	-1.64405
PLA2G12A	4	0.022712	0.062623	0.991102	1200	1	0.025246	0.39713	0.54149	0.999996	10301	2	0.025246	-1.64374
NECAB2	4	0.02278	0.062766	0.991102	1201	3	-0.25387	0.89957	0.89958	0.999996	17073	0	-0.25387	-1.64245
FEN1	4	0.022813	0.062844	0.991102	1202	2	-0.61564	0.49835	0.59491	0.999996	11281	1	-0.61564	-1.64182
NEUROD2	4	0.022819	0.06286	0.991102	1203	3	-0.15485	0.8534	0.85349	0.999996	16213	0	-0.15485	-1.6417
LOC100130370	4	0.022841	0.062908	0.991102	1204	2	-0.16775	0.3166	0.45542	0.999996	8646	2	-0.16775	-1.64128
RPL27A	4	0.022852	0.062925	0.991102	1205	3	-0.79851	0.98386	0.98398	0.999996	18760	0	-0.79851	-1.64108
NBPF15	4	0.022852	0.062925	0.991102	1206	3	-0.64616	0.9024	0.9024	0.999996	17140	0	-0.64616	-1.64108
URI1	4	0.022864	0.062955	0.991102	1207	2	-0.23346	0.94432	0.94436	0.999996	18001	0	-0.23346	-1.64085
DENND5B	4	0.022869	0.062966	0.991102	1208	3	-0.10719	0.22234	0.35408	0.999996	6729	1	-0.10719	-1.64075
NBPF4	4	0.022898	0.063021	0.991102	1209	3	-0.16652	0.98823	0.98827	0.999996	18861	0	-0.16652	-1.6402
FOXM1	4	0.022915	0.063056	0.991102	1210	2	-0.088413	0.61316	0.65743	0.999996	12466	1	-0.088413	-1.63988
CCNT1	4	0.022942	0.063107	0.991102	1211	3	-0.31874	0.92048	0.92049	0.999996	17501	0	-0.31874	-1.63937
IFNA10	4	0.02295	0.063123	0.991102	1212	2	-0.12498	0.50061	0.59604	0.999996	11311	1	-0.12498	-1.63922
TIPRL	4	0.022966	0.063157	0.991102	1213	2	-0.16126	0.93819	0.93815	0.999996	17884	0	-0.16126	-1.63891
IFNGR1	4	0.022985	0.063202	0.991102	1214	3	-0.19238	0.87925	0.8793	0.999996	16695	0	-0.19238	-1.63856
GRAPL	4	0.02299	0.06321	0.991102	1215	3	-0.17398	0.35343	0.4947	0.999996	9426	1	-0.17398	-1.63846
UGT2B28	4	0.023016	0.063267	0.991102	1216	2	-0.020271	0.25498	0.38909	0.999996	7425	2	-0.020271	-1.63797
CHCHD5	4	0.023056	0.063351	0.991102	1217	3	-0.29722	0.95364	0.95373	0.999996	18200	0	-0.29722	-1.63722
ACMSD	4	0.023066	0.063374	0.991102	1218	3	-0.22208	0.80335	0.80337	0.999996	15286	0	-0.22208	-1.63703
KRTAP4-7	4	0.023093	0.063432	0.991102	1219	3	-0.19392	0.93704	0.93698	0.999996	17868	0	-0.19392	-1.63652
OCM	4	0.023118	0.063499	0.991102	1220	1	0.0080921	0.6699	0.69395	0.999996	13145	1	0.0080921	-1.63605
PCDHGB4	4	0.023169	0.063615	0.991102	1221	1	-0.021185	0.81883	0.81893	0.999996	15551	0	-0.021185	-1.63509
RGP1	4	0.023214	0.063712	0.991102	1222	2	-0.13186	0.24608	0.37956	0.999996	7229	2	-0.13186	-1.63425
ZNF672	4	0.023219	0.063721	0.991102	1223	3	-0.083821	0.31692	0.45576	0.999996	8654	1	-0.083821	-1.63416
CLP1	4	0.023236	0.063765	0.991102	1224	3	-0.22329	0.95115	0.95128	0.999996	18143	0	-0.22329	-1.63384
PDCD4	4	0.023311	0.063933	0.991102	1225	2	-0.13303	0.83027	0.83039	0.999996	15767	0	-0.13303	-1.63244
DLX4	4	0.023321	0.063957	0.991102	1226	2	-0.094293	0.25073	0.38453	0.999996	7324	1	-0.094293	-1.63225
CTAG2	4	0.023355	0.064034	0.991102	1227	3	-0.16472	0.92847	0.92842	0.999996	17678	0	-0.16472	-1.63162
HAS2	4	0.023364	0.064046	0.991102	1228	3	-0.18611	0.76844	0.77035	0.999996	14623	1	-0.18611	-1.63145
HS3ST3A1	4	0.023371	0.064061	0.991102	1229	3	-0.28899	0.25893	0.39332	0.999996	7497	1	-0.28899	-1.63132
COMP	4	0.023372	0.064061	0.991102	1230	1	0.013336	0.78144	0.78218	0.999996	14860	1	0.013336	-1.6313
FOXG1	4	0.023416	0.064144	0.991102	1231	3	-0.16187	0.73259	0.74022	0.999996	14038	1	-0.16187	-1.63049
FILIP1	4	0.023417	0.064144	0.991102	1232	2	-0.19276	0.9814	0.9815	0.999996	18698	0	-0.19276	-1.63047
ERCC2	4	0.023422	0.064156	0.991102	1233	1	0.047324	0.43111	0.56292	0.999996	10707	1	0.047324	-1.63038
MCTS1	4	0.023448	0.06421	0.991102	1234	2	-0.14518	0.039509	0.098558	0.980568	1908	1	-0.14518	-1.62989
PHF1	4	0.023473	0.064263	0.991102	1235	2	0.026516	0.11046	0.23328	0.98913	4505	2	0.026516	-1.62943
ALK	4	0.023482	0.064284	0.991102	1236	3	-0.22425	0.87094	0.87099	0.999996	16533	0	-0.22425	-1.62926
CCL3L3	4	0.023509	0.064338	0.991102	1237	3	-0.23828	0.88736	0.8874	0.999996	16843	0	-0.23828	-1.62877
ERLIN2	4	0.023524	0.064372	0.991102	1238	2	-0.22589	0.42007	0.55793	0.999996	10610	1	-0.22589	-1.62849
CTAGE15	4	0.023575	0.06449	0.991102	1239	2	-0.22791	0.19863	0.32871	0.999996	6266	1	-0.22791	-1.62755
S1PR4	4	0.023585	0.064505	0.991102	1240	3	-0.2596	0.77936	0.78027	0.999996	14834	1	-0.2596	-1.62736
ZNF827	4	0.023625	0.064595	0.991102	1241	2	-0.097581	0.97037	0.97048	0.999996	18487	0	-0.097581	-1.62663
SIDT2	4	0.023634	0.064611	0.991102	1242	3	-0.12435	0.81453	0.81463	0.999996	15474	0	-0.12435	-1.62646
PTGIS	4	0.023648	0.064635	0.991102	1243	3	-0.1771	0.7645	0.76679	0.999996	14547	1	-0.1771	-1.62621
WDHD1	4	0.023676	0.06469	0.991102	1244	2	-0.036447	0.69887	0.71441	0.999996	13565	1	-0.036447	-1.62569
CHST15	4	0.023679	0.064698	0.991102	1245	3	-0.23593	0.48961	0.59059	0.999996	11197	1	-0.23593	-1.62564
PBDC1	4	0.02372	0.064791	0.991102	1246	3	-0.18227	0.30792	0.4461	0.999996	8469	1	-0.18227	-1.62489
CPNE4	4	0.023727	0.064807	0.991102	1247	2	-0.012012	0.11656	0.24002	0.991111	4625	2	-0.012012	-1.62476
GSTA1	4	0.023757	0.064865	0.991102	1248	3	-0.19816	0.97004	0.97016	0.999996	18482	0	-0.19816	-1.62421
TMEM8A	4	0.02379	0.064927	0.991102	1249	3	-0.65467	0.88254	0.8826	0.999996	16762	0	-0.65467	-1.62361
SECTM1	4	0.023807	0.064967	0.991102	1250	2	-0.10281	0.34842	0.48939	0.999996	9311	1	-0.10281	-1.6233
DCLK1	4	0.023823	0.064997	0.991102	1251	3	-0.18219	0.98254	0.98265	0.999996	18720	0	-0.18219	-1.623
PARD6G	4	0.023828	0.065006	0.991102	1252	2	-0.17804	0.38138	0.52458	0.999996	9983	1	-0.17804	-1.62291
GALNT9	4	0.023843	0.065034	0.991102	1253	3	-0.19616	0.92617	0.92613	0.999996	17639	0	-0.19616	-1.62264
CENPT	4	0.023862	0.065071	0.991102	1254	3	-0.26868	0.8835	0.88356	0.999996	16785	0	-0.26868	-1.62229
LOC101929983	4	0.023889	0.06513	0.991102	1255	3	-0.14647	0.019408	0.056341	0.966778	1097	1	-0.14647	-1.6218
SH3PXD2A	4	0.023926	0.065199	0.991102	1256	3	-0.12568	0.29103	0.42795	0.999996	8123	1	-0.12568	-1.62113
PCSK4	4	0.02393	0.065207	0.991102	1257	2	-0.065652	0.15116	0.27744	0.993956	5322	2	-0.065652	-1.62106
PRM3	4	0.023941	0.065233	0.991102	1258	2	-0.092296	0.8016	0.80165	0.999996	15258	1	-0.092296	-1.62086
AP1S3	4	0.02398	0.065318	0.991179	1259	2	-0.11111	0.78867	0.78896	0.999996	14999	1	-0.11111	-1.62015
RGN	4	0.023995	0.065342	0.991179	1260	2	-0.070381	0.11203	0.23521	0.98913	4539	2	-0.070381	-1.61988
H2AFX	4	0.024031	0.06543	0.991261	1261	2	-0.22846	0.83063	0.83078	0.999996	15771	0	-0.22846	-1.61923
CCDC137	4	0.024082	0.065525	0.991261	1262	1	-0.05074	0.85329	0.85337	0.999996	16210	0	-0.05074	-1.61831
SMYD3	4	0.024124	0.065622	0.991261	1263	3	-0.15138	0.98837	0.98842	0.999996	18864	0	-0.15138	-1.61755
CISH	4	0.024138	0.065645	0.991261	1264	2	-0.1408	0.35088	0.49203	0.999996	9371	2	-0.1408	-1.6173
TRIP10	4	0.024205	0.065785	0.991261	1265	2	-0.081971	0.74648	0.75161	0.999996	14261	1	-0.081971	-1.61609
CALM1	4	0.024252	0.065881	0.991261	1266	3	-0.22268	0.60302	0.65134	0.999996	12357	1	-0.22268	-1.61525
FAM131C	4	0.024262	0.065906	0.991261	1267	3	-0.28171	0.92492	0.92489	0.999996	17614	0	-0.28171	-1.61507
TRDN	4	0.024268	0.065921	0.991261	1268	2	-0.12904	0.091826	0.19949	0.986532	3845	1	-0.12904	-1.61497
SPI1	4	0.024285	0.065963	0.991261	1269	2	-0.065021	0.044061	0.10768	0.982021	2078	1	-0.065021	-1.61466
P4HTM	4	0.024304	0.066014	0.991261	1270	3	-0.1846	0.94693	0.94695	0.999996	18067	0	-0.1846	-1.61432
C2CD5	4	0.024373	0.066152	0.991261	1271	3	-0.21708	0.81887	0.81897	0.999996	15552	0	-0.21708	-1.61309
PPP4R2	4	0.024386	0.066184	0.991261	1272	1	-0.060673	0.89404	0.89402	0.999996	16975	0	-0.060673	-1.61286
CLSTN1	4	0.024407	0.06623	0.991261	1273	3	-0.22626	0.97599	0.97614	0.999996	18593	0	-0.22626	-1.61249
PEX14	4	0.024425	0.066272	0.991261	1274	3	-0.14467	0.9458	0.94584	0.999996	18033	0	-0.14467	-1.61217
FOXO6	4	0.024512	0.06646	0.991261	1275	3	-0.18913	0.97717	0.9773	0.999996	18620	0	-0.18913	-1.61062
LOC101927844	4	0.024586	0.06663	0.991261	1276	3	-0.20068	0.21964	0.35123	0.999996	6680	1	-0.20068	-1.60931
SLIT1	4	0.024589	0.066636	0.991261	1277	1	0.12497	0.098045	0.21099	0.986532	4071	3	0.12497	-1.60926
APOO	4	0.024617	0.066695	0.991261	1278	3	-0.2381	0.41528	0.55581	0.999996	10566	1	-0.2381	-1.60876
LAMA5	4	0.02464	0.066743	0.991261	1279	1	0.0016991	0.32576	0.46522	0.999996	8846	2	0.0016991	-1.60836
MESP1	4	0.02469	0.066852	0.991261	1280	3	-0.09512	0.86901	0.86907	0.999996	16492	0	-0.09512	-1.60748
MANSC4	4	0.024719	0.066917	0.991261	1281	2	-0.062374	0.22305	0.35485	0.999996	6744	2	-0.062374	-1.60697
TMEM52B	4	0.024741	0.066956	0.991261	1282	1	0.025909	0.78435	0.78486	0.999996	14922	1	0.025909	-1.60658
ZNF593	4	0.024743	0.066961	0.991261	1283	3	-0.11232	0.66872	0.69312	0.999996	13130	1	-0.11232	-1.60655
KCTD14	4	0.024792	0.067075	0.991261	1284	2	-0.1537	0.76343	0.76586	0.999996	14532	1	-0.1537	-1.60569
ETV3	4	0.024792	0.067075	0.991261	1285	3	-0.23752	0.82076	0.82086	0.999996	15582	0	-0.23752	-1.60569
TBX21	4	0.024815	0.067113	0.991261	1286	3	-0.17179	0.70205	0.71677	0.999996	13606	1	-0.17179	-1.60529
PYGM	4	0.024824	0.06713	0.991261	1287	3	-0.14252	0.64091	0.67482	0.999996	12791	1	-0.14252	-1.60513
SFTA3	4	0.024842	0.067165	0.991261	1288	2	-0.16847	0.7533	0.75726	0.999996	14374	1	-0.16847	-1.60481
DACT3	4	0.024842	0.067166	0.991261	1289	2	0.0037748	0.64824	0.67953	0.999996	12876	1	0.0037748	-1.60481
SIAH2	4	0.02486	0.067204	0.991261	1290	3	-0.12535	0.97469	0.97484	0.999996	18571	0	-0.12535	-1.6045
PROP1	4	0.024885	0.067258	0.991261	1291	3	-0.10336	0.88436	0.88442	0.999996	16798	0	-0.10336	-1.60406
HACE1	4	0.024893	0.067278	0.991261	1292	3	-0.11635	0.71146	0.72378	0.999996	13726	1	-0.11635	-1.60392
AGFG2	4	0.0249	0.067288	0.991261	1293	3	-0.12245	0.63481	0.67089	0.999996	12708	1	-0.12245	-1.6038
C2orf69	4	0.024914	0.067324	0.991261	1294	3	-0.20123	0.61912	0.66114	0.999996	12535	1	-0.20123	-1.60356
MROH2B	4	0.024944	0.067389	0.991261	1295	1	0.04107	0.81351	0.8136	0.999996	15455	0	0.04107	-1.60303
CHCHD3	4	0.024961	0.067418	0.991261	1296	3	-0.2341	0.61938	0.6613	0.999996	12540	1	-0.2341	-1.60274
SLC7A4	4	0.024994	0.067497	0.991261	1297	3	-0.24471	0.89324	0.89324	0.999996	16958	0	-0.24471	-1.60216
EME1	4	0.025029	0.067574	0.991261	1298	3	-0.20255	0.56933	0.63208	0.999996	12002	1	-0.20255	-1.60156
NAF1	4	0.025045	0.067604	0.991261	1299	1	0.035071	0.64127	0.67505	0.999996	12795	1	0.035071	-1.60128
PPFIA4	4	0.025045	0.067604	0.991261	1300	3	-0.11907	0.75839	0.76156	0.999996	14457	1	-0.11907	-1.60128
ZDHHC7	4	0.025074	0.067666	0.991261	1301	3	-0.19991	0.75515	0.75877	0.999996	14399	1	-0.19991	-1.60078
C17orf105	4	0.025096	0.067713	0.991261	1302	2	-0.065789	0.77001	0.77172	0.999996	14655	1	-0.065789	-1.6004
RSAD1	4	0.025146	0.06782	0.991261	1303	2	-0.021866	0.21633	0.34766	0.999996	6621	1	-0.021866	-1.59953
EDC4	4	0.025197	0.067931	0.991261	1304	2	-0.09251	0.41245	0.5545	0.999996	10538	1	-0.09251	-1.59865
SEC22C	4	0.025206	0.067946	0.991261	1305	2	-0.099785	0.42854	0.56174	0.999996	10691	1	-0.099785	-1.5985
HPCA	4	0.025248	0.06804	0.991261	1306	2	-0.16787	0.79401	0.79407	0.999996	15113	1	-0.16787	-1.59777
TRNP1	4	0.025252	0.068045	0.991261	1307	2	-0.058407	0.74755	0.75251	0.999996	14275	1	-0.058407	-1.5977
OR8G2	4	0.025298	0.068149	0.991261	1308	1	0.24042	0.010432	0.034916	0.941204	700	2	0.24042	-1.59691
SNX3	4	0.025307	0.068171	0.991261	1309	2	-0.025222	0.16092	0.28805	0.994839	5535	2	-0.025222	-1.59676
TMED9	4	0.025348	0.068269	0.991261	1310	3	-0.22536	0.81354	0.81363	0.999996	15456	0	-0.22536	-1.59606
SLC18B1	4	0.025371	0.068315	0.991261	1311	2	-0.032483	0.36051	0.50223	0.999996	9564	1	-0.032483	-1.59566
ULBP2	4	0.025379	0.068336	0.991261	1312	3	-0.17896	0.67399	0.69676	0.999996	13197	1	-0.17896	-1.59553
PRR34	4	0.0254	0.068383	0.991261	1313	2	-0.11717	0.3435	0.4841	0.999996	9216	2	-0.11717	-1.59517
KIFAP3	4	0.02545	0.068491	0.991261	1314	1	-0.011453	0.60143	0.65038	0.999996	12338	1	-0.011453	-1.59431
PAM	4	0.025472	0.068543	0.991261	1315	3	-0.19927	0.50234	0.59691	0.999996	11337	1	-0.19927	-1.59394
OR4D9	4	0.025501	0.068603	0.991261	1316	2	-0.21757	0.82416	0.8243	0.999996	15653	0	-0.21757	-1.59344
VPS4A	4	0.025502	0.068608	0.991261	1317	3	-0.22802	0.090095	0.19631	0.986532	3791	1	-0.22802	-1.59343
CHRNA5	4	0.02551	0.068623	0.991261	1318	3	-0.1682	0.98147	0.98156	0.999996	18701	0	-0.1682	-1.59329
KIF20B	4	0.025517	0.068642	0.991261	1319	2	0.021659	0.037954	0.095341	0.980568	1841	2	0.021659	-1.59317
DNAJC27	4	0.025552	0.068702	0.991261	1320	2	-0.15581	0.9166	0.91655	0.999996	17421	0	-0.15581	-1.59258
SLC22A12	4	0.025602	0.068822	0.991261	1321	1	0.19133	0.093275	0.20219	0.986532	3905	3	0.19133	-1.59173
PRL	4	0.025637	0.068896	0.991261	1322	3	-0.12063	0.96049	0.96056	0.999996	18319	0	-0.12063	-1.59113
THSD7B	4	0.025653	0.068932	0.991261	1323	2	0.089169	0.11444	0.23778	0.989281	4592	2	0.089169	-1.59086
VN1R5	4	0.025674	0.068981	0.991261	1324	2	-0.14513	0.89022	0.89025	0.999996	16900	0	-0.14513	-1.59051
SIM1	4	0.025686	0.069005	0.991261	1325	3	-0.23478	0.89322	0.89321	0.999996	16956	0	-0.23478	-1.5903
PEX26	4	0.025691	0.069011	0.991261	1326	3	-0.15601	0.56688	0.63074	0.999996	11973	1	-0.15601	-1.59022
CSDE1	4	0.025704	0.069027	0.991261	1327	1	-0.081106	0.61017	0.6556	0.999996	12441	1	-0.081106	-1.59
LPO	4	0.025763	0.069151	0.991261	1328	3	-0.15028	0.94933	0.9494	0.999996	18110	0	-0.15028	-1.589
UBL4A	4	0.025805	0.069251	0.991261	1329	2	-0.044441	0.7517	0.75591	0.999996	14340	1	-0.044441	-1.5883
PPAP2B	4	0.025856	0.069361	0.991261	1330	1	-0.035737	0.79999	0.80002	0.999996	15224	1	-0.035737	-1.58744
DCAF4L1	4	0.025895	0.069443	0.991261	1331	3	-0.19299	0.67205	0.69542	0.999996	13177	1	-0.19299	-1.58678
FRG1	4	0.025906	0.069463	0.991261	1332	1	0.080826	0.40511	0.55011	0.999996	10453	2	0.080826	-1.5866
NRL	4	0.025932	0.06952	0.991261	1333	2	-0.078233	0.86618	0.86629	0.999996	16441	0	-0.078233	-1.58616
FAM32A	4	0.025951	0.069561	0.991261	1334	2	-0.22693	0.57453	0.63501	0.999996	12053	1	-0.22693	-1.58585
G2E3	4	0.025957	0.069574	0.991261	1335	1	-0.034955	0.57444	0.63497	0.999996	12052	1	-0.034955	-1.58575
ZNF286B	4	0.025979	0.069625	0.991261	1336	3	-0.18876	0.92862	0.92856	0.999996	17681	0	-0.18876	-1.58538
DMXL1	4	0.026008	0.069694	0.991261	1337	3	-0.16532	0.72418	0.73358	0.999996	13913	1	-0.16532	-1.58489
TIMM8B	4	0.026015	0.069706	0.991261	1338	3	-0.14157	0.92193	0.92197	0.999996	17533	0	-0.14157	-1.58478
TNS4	4	0.026058	0.069797	0.991261	1339	2	-0.10796	0.58471	0.64071	0.999996	12148	1	-0.10796	-1.58406
KANK1	4	0.026081	0.069838	0.991261	1340	3	-0.18642	0.75141	0.75568	0.999996	14334	1	-0.18642	-1.58368
TUBG2	4	0.026109	0.069895	0.991261	1341	2	-0.060974	0.94072	0.9407	0.999996	17928	0	-0.060974	-1.58321
PCSK1N	4	0.026113	0.069906	0.991261	1342	2	-0.12805	0.93703	0.93697	0.999996	17867	0	-0.12805	-1.58314
HSPA4	4	0.026124	0.069932	0.991261	1343	3	-0.20522	0.044261	0.10803	0.982021	2085	1	-0.20522	-1.58296
RBM4	4	0.026134	0.069953	0.991261	1344	3	-0.2133	0.5702	0.63256	0.999996	12012	1	-0.2133	-1.58279
GSAP	4	0.026139	0.069962	0.991261	1345	3	-0.15707	0.39002	0.53381	0.999996	10165	1	-0.15707	-1.58271
KLK1	4	0.02616	0.070011	0.991261	1346	1	-0.0055702	0.74465	0.75011	0.999996	14233	1	-0.0055702	-1.58236
GADD45G	4	0.026164	0.070028	0.991261	1347	2	-0.18164	0.15771	0.28454	0.993956	5464	1	-0.18164	-1.5823
HSD17B3	4	0.02621	0.07013	0.991261	1348	3	-0.18065	0.47344	0.58277	0.999996	11066	1	-0.18065	-1.58153
PPM1B	4	0.026223	0.070156	0.991261	1349	3	-0.11975	0.60069	0.64992	0.999996	12332	1	-0.11975	-1.58132
ARMCX2	4	0.026262	0.070239	0.991261	1350	3	-0.26982	0.024031	0.066142	0.973477	1297	1	-0.26982	-1.58067
ELF3	4	0.026323	0.070386	0.991261	1351	2	-0.1684	0.71375	0.72545	0.999996	13757	1	-0.1684	-1.57966
RINL	4	0.026362	0.070466	0.991261	1352	2	-0.11705	0.93829	0.93826	0.999996	17886	0	-0.11705	-1.57902
SOX6	4	0.026413	0.070589	0.991261	1353	1	0.21047	0.029457	0.077668	0.980459	1506	3	0.21047	-1.57818
PECR	4	0.026463	0.070689	0.991261	1354	1	-0.063587	0.15033	0.27657	0.993956	5305	1	-0.063587	-1.57736
F2	4	0.026469	0.070705	0.991261	1355	3	-0.24383	0.55869	0.62623	0.999996	11884	1	-0.24383	-1.57726
OR6C68	4	0.026472	0.070711	0.991261	1356	2	-0.12875	0.76541	0.76759	0.999996	14569	1	-0.12875	-1.57721
ZIK1	4	0.02649	0.070748	0.991261	1357	2	-0.16978	0.32157	0.46072	0.999996	8759	1	-0.16978	-1.57692
C6orf62	4	0.026509	0.070783	0.991261	1358	2	-0.18449	0.10848	0.22977	0.988195	4444	1	-0.18449	-1.57661
ZNF185	4	0.026514	0.070794	0.991261	1359	2	-0.13256	0.57919	0.63762	0.999996	12097	1	-0.13256	-1.57652
SSTR3	4	0.026528	0.070828	0.991261	1360	2	-0.082651	0.31044	0.44891	0.999996	8513	2	-0.082651	-1.5763
OMP	4	0.026535	0.070839	0.991261	1361	3	-0.30523	0.38431	0.52772	0.999996	10048	1	-0.30523	-1.57618
SPTLC1	4	0.026551	0.070881	0.991261	1362	2	-0.003741	0.14731	0.27332	0.993956	5239	2	-0.003741	-1.57592
FCER1G	4	0.026565	0.07091	0.991261	1363	2	-0.089702	0.9447	0.94476	0.999996	18007	0	-0.089702	-1.57569
SDF2L1	4	0.026581	0.070938	0.991261	1364	3	-0.22983	0.93696	0.93691	0.999996	17865	0	-0.22983	-1.57543
GALR1	4	0.026615	0.071018	0.991261	1365	3	-0.2266	0.70135	0.71623	0.999996	13601	1	-0.2266	-1.57487
ATP2B1	4	0.026615	0.071019	0.991261	1366	3	-0.13853	0.76606	0.76818	0.999996	14584	1	-0.13853	-1.57487
LPAR6	4	0.026666	0.071123	0.991261	1367	2	-0.074665	0.36422	0.50618	0.999996	9630	2	-0.074665	-1.57404
GP1BA	4	0.026699	0.071201	0.991261	1368	3	-0.32601	0.00080037	0.0029864	0.906019	63	1	-0.32601	-1.57351
SLC44A4	4	0.026738	0.071292	0.991261	1369	3	-0.1628	0.68711	0.70585	0.999996	13385	1	-0.1628	-1.57287
HSPBAP1	4	0.026757	0.071326	0.991261	1370	3	-0.3236	0.93414	0.93408	0.999996	17803	0	-0.3236	-1.57256
ZNF674	4	0.026767	0.071356	0.991261	1371	1	0.076688	0.01884	0.055055	0.966778	1075	2	0.076688	-1.5724
CCDC168	4	0.026802	0.071427	0.991261	1372	3	-0.3164	0.90765	0.90761	0.999996	17238	0	-0.3164	-1.57183
C1orf86	4	0.026868	0.071577	0.991261	1373	1	0.002425	0.85601	0.85615	0.999996	16257	0	0.002425	-1.57076
ROMO1	4	0.026871	0.07158	0.991261	1374	3	-0.63302	0.81072	0.81082	0.999996	15412	0	-0.63302	-1.57072
GABARAP	4	0.02688	0.071599	0.991261	1375	3	-0.28716	0.96198	0.96207	0.999996	18342	0	-0.28716	-1.57057
CCDC77	4	0.026919	0.071677	0.991261	1376	2	-0.12578	0.27979	0.41584	0.999996	7894	1	-0.12578	-1.56994
TMEM247	4	0.026969	0.071792	0.991261	1377	2	-0.044626	0.53002	0.611	0.999996	11599	1	-0.044626	-1.56914
WNT5B	4	0.026979	0.071816	0.991261	1378	3	-0.21909	0.8848	0.88483	0.999996	16805	0	-0.21909	-1.56897
CLN5	4	0.027016	0.071895	0.991261	1379	3	-0.2312	0.60861	0.65467	0.999996	12421	1	-0.2312	-1.56838
ADAMTS10	4	0.027059	0.071981	0.991261	1380	2	-0.21788	0.85155	0.85162	0.999996	16180	0	-0.21788	-1.56769
MBIP	4	0.027121	0.072121	0.991261	1381	3	-0.26629	0.69818	0.71388	0.999996	13552	1	-0.26629	-1.56669
PIFO	4	0.027172	0.072228	0.991261	1382	1	0.097736	0.15349	0.27997	0.993956	5364	2	0.097736	-1.56588
SPINK7	4	0.027222	0.07235	0.991261	1383	2	-0.44383	0.95877	0.95884	0.999996	18289	0	-0.44383	-1.56508
CBFB	4	0.027233	0.072371	0.991261	1384	2	-0.1375	0.25119	0.38502	0.999996	7339	2	-0.1375	-1.5649
RBMY1J	4	0.027243	0.072388	0.991261	1385	2	-0.18269	0.73685	0.74367	0.999996	14106	1	-0.18269	-1.56475
UBLCP1	4	0.027261	0.07243	0.991261	1386	3	-0.20914	0.87668	0.87673	0.999996	16639	0	-0.20914	-1.56446
SULT2A1	4	0.027271	0.072451	0.991261	1387	3	-0.23045	0.92863	0.92857	0.999996	17682	0	-0.23045	-1.5643
OR11G2	4	0.027321	0.07256	0.991261	1388	3	-0.11858	0.97244	0.97256	0.999996	18535	0	-0.11858	-1.5635
POU2F1	4	0.027324	0.072563	0.991261	1389	2	-0.078581	0.38637	0.52994	0.999996	10096	2	-0.078581	-1.56346
RIT2	4	0.027328	0.072574	0.991261	1390	2	-0.097854	0.22618	0.35819	0.999996	6812	2	-0.097854	-1.56339
TMEM154	4	0.027366	0.07265	0.991261	1391	3	-0.25482	0.56145	0.6277	0.999996	11909	1	-0.25482	-1.56279
GLYATL2	4	0.027374	0.072667	0.991261	1392	3	-0.25216	0.9398	0.93978	0.999996	17912	0	-0.25216	-1.56266
UNCX	4	0.02738	0.072683	0.991261	1393	3	-0.12071	0.92753	0.9275	0.999996	17661	0	-0.12071	-1.56257
SLC9A6	4	0.027395	0.072708	0.991261	1394	3	-0.15207	0.47333	0.58273	0.999996	11064	1	-0.15207	-1.56233
SYNCRIP	4	0.02746	0.072837	0.991261	1395	3	-0.2914	0.56365	0.62892	0.999996	11936	1	-0.2914	-1.5613
OR1N2	4	0.027475	0.072873	0.991261	1396	2	-0.11582	0.91722	0.91721	0.999996	17440	0	-0.11582	-1.56106
PANK3	4	0.027499	0.072925	0.991261	1397	3	-0.34717	0.92162	0.92165	0.999996	17527	0	-0.34717	-1.56068
BUB1	4	0.027518	0.072967	0.991261	1398	3	-0.37278	0.90191	0.9019	0.999996	17127	0	-0.37278	-1.56038
TECR	4	0.027526	0.072986	0.991261	1399	1	0.036153	0.46005	0.57637	0.999996	10954	1	0.036153	-1.56026
OR6Q1	4	0.027577	0.073091	0.991261	1400	1	0.016	0.12003	0.24377	0.992603	4693	1	0.016	-1.55945
BIRC8	4	0.027594	0.073127	0.991261	1401	2	-0.084323	0.25521	0.38934	0.999996	7428	2	-0.084323	-1.55919
SNRPD1	4	0.027627	0.07321	0.991261	1402	2	-0.048682	0.097818	0.21056	0.986532	4063	1	-0.048682	-1.55867
ECE1	4	0.027645	0.07324	0.991261	1403	3	-0.1053	0.90707	0.90704	0.999996	17226	0	-0.1053	-1.55838
KIAA0895	4	0.027678	0.0733	0.991261	1404	2	-0.090605	0.72578	0.73482	0.999996	13939	1	-0.090605	-1.55787
FMR1NB	4	0.02768	0.073309	0.991261	1405	3	-0.13407	0.79312	0.79319	0.999996	15095	1	-0.13407	-1.55783
FLNA	4	0.027728	0.073406	0.991261	1406	1	0.0040966	0.73175	0.7396	0.999996	14028	1	0.0040966	-1.55708
MOSPD1	4	0.027737	0.073427	0.991261	1407	3	-0.27949	0.2548	0.38889	0.999996	7422	1	-0.27949	-1.55694
CCDC154	4	0.027775	0.073502	0.991261	1408	2	-0.094002	0.64549	0.67774	0.999996	12840	1	-0.094002	-1.55635
RABEPK	4	0.027779	0.07351	0.991261	1409	2	0.12894	0.037204	0.093759	0.980568	1815	2	0.12894	-1.55628
HOXB2	4	0.027829	0.073624	0.991261	1410	2	-0.11529	0.092355	0.20049	0.986532	3871	1	-0.11529	-1.5555
SDCCAG3	4	0.027861	0.073694	0.991261	1411	2	-0.19249	0.86143	0.86159	0.999996	16352	0	-0.19249	-1.555
TRIM16	4	0.027866	0.073707	0.991261	1412	3	-0.21664	0.9345	0.93443	0.999996	17813	0	-0.21664	-1.55493
GNB5	4	0.027871	0.073718	0.991261	1413	3	-0.26515	0.78443	0.78494	0.999996	14923	1	-0.26515	-1.55485
NIT1	4	0.027931	0.073844	0.991261	1414	2	-0.016758	0.67342	0.69636	0.999996	13190	1	-0.016758	-1.55391
RPH3A	4	0.027967	0.07391	0.991261	1415	3	-0.13855	0.91289	0.91283	0.999996	17342	0	-0.13855	-1.55335
PLCH1	4	0.027981	0.073941	0.991261	1416	1	-0.068562	0.5723	0.63375	0.999996	12033	1	-0.068562	-1.55314
CNDP1	4	0.028032	0.074063	0.991261	1417	1	-0.058898	0.38469	0.52815	0.999996	10057	1	-0.058898	-1.55235
GGCX	4	0.028058	0.074113	0.991261	1418	3	-0.52819	0.9539	0.95398	0.999996	18207	0	-0.52819	-1.55194
SLC7A6OS	4	0.028062	0.074127	0.991261	1419	2	-0.14275	0.87907	0.87911	0.999996	16691	0	-0.14275	-1.55188
POLN	4	0.028119	0.074255	0.991261	1420	2	0.011669	0.090769	0.19754	0.986532	3811	2	0.011669	-1.551
GTF2H4	4	0.028129	0.074271	0.991261	1421	2	-0.27078	0.85322	0.85331	0.999996	16209	0	-0.27078	-1.55085
E2F3	4	0.028133	0.074279	0.991261	1422	2	-0.1257	0.0012391	0.0045444	0.915891	89	1	-0.1257	-1.55078
APITD1-CORT	4	0.028174	0.074353	0.991261	1423	3	-0.34156	0.38003	0.52314	0.999996	9952	1	-0.34156	-1.55015
PSMB4	4	0.028183	0.074366	0.991261	1424	2	-1.047	0.072794	0.16395	0.986532	3161	1	-1.047	-1.55001
MTERF1	4	0.028187	0.074372	0.991261	1425	2	-0.1344	0.49486	0.59313	0.999996	11244	1	-0.1344	-1.54995
DYM	4	0.028234	0.074466	0.991261	1426	1	0.16334	0.18305	0.31195	0.999496	5962	2	0.16334	-1.54923
OR9Q2	4	0.028235	0.074467	0.991261	1427	3	-0.12131	0.95176	0.95189	0.999996	18155	0	-0.12131	-1.54921
THOC7	4	0.028255	0.074513	0.991261	1428	3	-0.22881	0.89586	0.89588	0.999996	17002	0	-0.22881	-1.5489
PLCB3	4	0.02827	0.074545	0.991261	1429	3	-0.29822	0.40712	0.55216	0.999996	10491	1	-0.29822	-1.54867
CEBPB	4	0.028306	0.074618	0.991261	1430	3	-0.18173	0.9039	0.90389	0.999996	17163	0	-0.18173	-1.54812
ATP6V0D2	4	0.028335	0.074676	0.991261	1431	2	-0.19692	0.94151	0.9415	0.999996	17942	0	-0.19692	-1.54768
HSPA1B	4	0.028357	0.074724	0.991261	1432	3	-0.1879	0.98066	0.98077	0.999996	18688	0	-0.1879	-1.54734
ALG1L	4	0.028365	0.07474	0.991261	1433	2	-0.25198	0.95912	0.95918	0.999996	18296	0	-0.25198	-1.54722
OR11H4	4	0.028386	0.074786	0.991261	1434	1	0.038852	0.52321	0.60749	0.999996	11526	1	0.038852	-1.5469
SERPINI1	4	0.028387	0.074789	0.991261	1435	3	-0.16415	0.088265	0.19299	0.986532	3723	1	-0.16415	-1.54688
IGSF22	4	0.028392	0.074802	0.991261	1436	3	-0.18507	0.97618	0.97631	0.999996	18596	0	-0.18507	-1.5468
NDRG4	4	0.028475	0.074979	0.991261	1437	3	-0.13352	0.96207	0.96216	0.999996	18343	0	-0.13352	-1.54554
RNF213	4	0.028487	0.075005	0.991261	1438	2	0.057304	0.2036	0.33405	0.999996	6367	2	0.057304	-1.54535
PEG3	4	0.028537	0.075127	0.991261	1439	2	-0.072134	0.8689	0.86897	0.999996	16491	0	-0.072134	-1.54459
CCDC184	4	0.028569	0.075188	0.991261	1440	3	-0.25865	0.89898	0.899	0.999996	17067	0	-0.25865	-1.5441
SRSF6	4	0.028588	0.075227	0.991261	1441	1	0.22449	0.063707	0.14642	0.986532	2829	2	0.22449	-1.54382
B3GALNT2	4	0.028638	0.075318	0.991261	1442	1	0.059101	0.33653	0.47666	0.999996	9077	2	0.059101	-1.54306
ARFIP2	4	0.02865	0.075355	0.991261	1443	3	-0.21766	0.9877	0.98775	0.999996	18852	0	-0.21766	-1.54288
SUSD6	4	0.028714	0.075496	0.991261	1444	2	-0.17488	0.70597	0.71962	0.999996	13654	1	-0.17488	-1.54191
USB1	4	0.028727	0.075527	0.991261	1445	2	-0.21483	0.88782	0.88785	0.999996	16850	0	-0.21483	-1.54171
TPD52L3	4	0.028737	0.075545	0.991261	1446	2	-0.1273	0.54	0.61622	0.999996	11693	1	-0.1273	-1.54156
C1orf123	4	0.02879	0.075661	0.991261	1447	1	0.0019751	0.76305	0.76553	0.999996	14529	1	0.0019751	-1.54076
TPR	4	0.028795	0.075667	0.991261	1448	2	-0.15998	0.93546	0.93541	0.999996	17833	0	-0.15998	-1.54068
SPINK1	4	0.028802	0.075683	0.991261	1449	3	-0.12527	0.23724	0.37007	0.999996	7027	1	-0.12527	-1.54058
UGT2B4	4	0.028824	0.075728	0.991261	1450	2	-0.092702	0.59952	0.64925	0.999996	12320	1	-0.092702	-1.54025
PXDN	4	0.028891	0.075867	0.991261	1451	1	-0.0263	0.50115	0.59633	0.999996	11319	1	-0.0263	-1.53924
DMRT2	4	0.02894	0.075967	0.991261	1452	2	-0.13725	0.42996	0.56237	0.999996	10701	1	-0.13725	-1.5385
PTK6	4	0.028941	0.075969	0.991261	1453	2	-0.1848	0.34835	0.48932	0.999996	9308	1	-0.1848	-1.53849
FLT4	4	0.02896	0.076004	0.991261	1454	2	-0.12079	0.20834	0.33906	0.999996	6457	1	-0.12079	-1.5382
SLC13A4	4	0.028964	0.076012	0.991261	1455	3	-0.1455	0.89264	0.89265	0.999996	16944	0	-0.1455	-1.53814
OR4A47	4	0.028979	0.076044	0.991261	1456	2	-0.14673	0.077714	0.17341	0.986532	3344	2	-0.14673	-1.53792
KRTAP5-6	4	0.028992	0.07607	0.991261	1457	3	-0.16279	0.92904	0.92898	0.999996	17695	0	-0.16279	-1.53772
THBS2	4	0.029033	0.076142	0.991261	1458	3	-0.11231	0.60856	0.65464	0.999996	12420	1	-0.11231	-1.53711
FAM150A	4	0.029038	0.076148	0.991261	1459	2	-0.1221	0.30206	0.4399	0.999996	8347	1	-0.1221	-1.53703
TMEM144	4	0.029132	0.076348	0.991261	1460	3	-0.16518	0.97797	0.97811	0.999996	18636	0	-0.16518	-1.53563
ZNF550	4	0.029144	0.07638	0.991261	1461	2	-0.025166	0.72076	0.73088	0.999996	13860	1	-0.025166	-1.53545
ATL1	4	0.029194	0.076482	0.991261	1462	3	-0.16296	0.94514	0.94519	0.999996	18018	0	-0.16296	-1.53471
SOX2	4	0.029194	0.076482	0.991261	1463	1	0.01162	0.75666	0.76011	0.999996	14428	1	0.01162	-1.53471
GPC2	4	0.029203	0.0765	0.991261	1464	3	-0.1739	0.97962	0.97975	0.999996	18670	0	-0.1739	-1.53457
S100A7L2	4	0.029204	0.076502	0.991261	1465	3	-0.35146	0.43464	0.56447	0.999996	10728	1	-0.35146	-1.53456
GPR75-ASB3	4	0.029223	0.076535	0.991261	1466	2	-0.067152	0.14625	0.27221	0.993956	5225	2	-0.067152	-1.53428
GPR157	4	0.029245	0.076581	0.991261	1467	2	-0.063185	0.45344	0.5732	0.999996	10888	1	-0.063185	-1.53395
KRTAP5-8	4	0.029247	0.076586	0.991261	1468	2	-0.15942	0.95217	0.95231	0.999996	18165	0	-0.15942	-1.53392
NOXRED1	4	0.029266	0.076628	0.991261	1469	3	-0.12576	0.14676	0.27274	0.993956	5231	1	-0.12576	-1.53364
SLC26A11	4	0.029277	0.076648	0.991261	1470	3	-0.14944	0.22844	0.36059	0.999996	6860	1	-0.14944	-1.53347
SH3D19	4	0.029287	0.076667	0.991261	1471	3	-0.25703	0.95246	0.95259	0.999996	18174	0	-0.25703	-1.53333
CDC14A	4	0.029295	0.07669	0.991261	1472	2	-0.2147	0.88449	0.88455	0.999996	16800	0	-0.2147	-1.53321
TPTE2	4	0.029396	0.076884	0.991261	1473	3	-0.21905	0.89342	0.89341	0.999996	16961	0	-0.21905	-1.53171
RFX7	4	0.029422	0.076939	0.991261	1474	3	-0.17285	0.86834	0.86842	0.999996	16479	0	-0.17285	-1.53133
DNAH7	4	0.029447	0.076985	0.991261	1475	2	-0.050388	0.83255	0.83268	0.999996	15819	0	-0.050388	-1.53096
IDS	4	0.029495	0.07709	0.991261	1476	3	-0.13977	0.98587	0.98595	0.999996	18811	0	-0.13977	-1.53025
NPLOC4	4	0.029497	0.077092	0.991261	1477	3	-0.38364	0.90208	0.90209	0.999996	17134	0	-0.38364	-1.53022
OR2M2	4	0.029506	0.077109	0.991261	1478	2	-0.18613	0.84055	0.84069	0.999996	15979	0	-0.18613	-1.53009
WDR1	4	0.029524	0.077142	0.991261	1479	3	-0.50939	0.47146	0.58184	0.999996	11048	1	-0.50939	-1.52982
AHR	4	0.029526	0.077149	0.991261	1480	3	-0.11071	0.93607	0.93603	0.999996	17847	0	-0.11071	-1.5298
HNRNPA3	4	0.029548	0.077192	0.991261	1481	2	-0.15656	0.97441	0.97454	0.999996	18566	0	-0.15656	-1.52947
HCN3	4	0.029556	0.077207	0.991261	1482	3	-0.19256	0.53596	0.61407	0.999996	11652	1	-0.19256	-1.52935
AAAS	4	0.029649	0.077398	0.991261	1483	2	-0.091093	0.96805	0.96814	0.999996	18454	0	-0.091093	-1.52799
FAM135B	4	0.029699	0.077503	0.991261	1484	2	-0.068244	0.21947	0.35103	0.999996	6678	1	-0.068244	-1.52726
MADD	4	0.029723	0.077555	0.991261	1485	3	-0.1981	0.40925	0.55307	0.999996	10510	1	-0.1981	-1.52691
VDAC1	4	0.029742	0.0776	0.991261	1486	2	-0.1672	0.8519	0.85197	0.999996	16184	0	-0.1672	-1.52663
DOCK4	4	0.029801	0.077722	0.991261	1487	2	-0.10681	0.33601	0.47609	0.999996	9063	1	-0.10681	-1.52577
DESI2	4	0.029851	0.07783	0.991261	1488	2	-0.11934	0.94328	0.94332	0.999996	17977	0	-0.11934	-1.52504
SORBS2	4	0.029851	0.077831	0.991261	1489	3	-0.26132	0.72964	0.73791	0.999996	13996	1	-0.26132	-1.52504
LRRC10	4	0.029901	0.077947	0.991261	1490	3	-0.26183	0.97647	0.97662	0.999996	18602	0	-0.26183	-1.52431
ACBD6	4	0.029901	0.077947	0.991261	1491	2	0.041889	0.061141	0.14137	0.986532	2730	2	0.041889	-1.52431
IL18BP	4	0.029967	0.07809	0.991261	1492	3	-0.18797	0.92352	0.92356	0.999996	17579	0	-0.18797	-1.52336
ADSS	4	0.029974	0.078104	0.991261	1493	2	-0.08703	0.33129	0.47108	0.999996	8969	2	-0.08703	-1.52326
ZIC3	4	0.030053	0.078268	0.991261	1494	1	0.11478	0.081753	0.18097	0.986532	3495	3	0.11478	-1.52211
OR1S2	4	0.030058	0.078279	0.991261	1495	3	-0.13949	0.66712	0.69203	0.999996	13111	1	-0.13949	-1.52204
FAM157B	4	0.030082	0.078331	0.991261	1496	2	-0.19114	0.95009	0.95018	0.999996	18126	0	-0.19114	-1.52169
CFDP1	4	0.030091	0.07835	0.991261	1497	3	-0.29583	0.22635	0.35839	0.999996	6818	1	-0.29583	-1.52156
KRTAP12-4	4	0.030154	0.078494	0.991261	1498	2	-0.05408	0.81546	0.81556	0.999996	15487	0	-0.05408	-1.52066
BAG4	4	0.030183	0.078564	0.991261	1499	3	-0.15206	0.97207	0.97218	0.999996	18526	0	-0.15206	-1.52024
NUDT16	4	0.030231	0.078661	0.991261	1500	3	-0.14168	0.46021	0.57644	0.999996	10955	1	-0.14168	-1.51955
ZBTB5	4	0.030246	0.078691	0.991261	1501	2	-0.24117	0.13031	0.25486	0.993956	4887	1	-0.24117	-1.51933
MTHFD1	4	0.030255	0.078709	0.991261	1502	1	-0.044457	0.94588	0.94593	0.999996	18035	0	-0.044457	-1.5192
ELMSAN1	4	0.030305	0.078815	0.991261	1503	2	-0.083283	0.71978	0.73013	0.999996	13847	1	-0.083283	-1.51849
BRPF1	4	0.030331	0.078867	0.991261	1504	3	-0.19371	0.93938	0.93936	0.999996	17905	0	-0.19371	-1.51811
LNX2	4	0.030355	0.078923	0.991261	1505	1	-0.10493	0.94286	0.94288	0.999996	17966	0	-0.10493	-1.51777
PDE7B	4	0.030424	0.079061	0.991261	1506	3	-0.24685	0.46743	0.57986	0.999996	11018	1	-0.24685	-1.51678
ITPR1	4	0.030485	0.079183	0.991261	1507	3	-0.17456	0.93189	0.93186	0.999996	17747	0	-0.17456	-1.51591
DNAJC22	4	0.030557	0.079341	0.991261	1508	3	-0.18065	0.98433	0.98446	0.999996	18768	0	-0.18065	-1.51489
ATP6V0B	4	0.030563	0.079353	0.991261	1509	3	-0.30116	0.20326	0.33367	0.999996	6363	1	-0.30116	-1.5148
BANP	4	0.030564	0.079354	0.991261	1510	2	-1.0559	0.001884	0.0068123	0.915891	135	1	-1.0559	-1.51479
MYBBP1A	4	0.030589	0.079406	0.991261	1511	3	-0.22758	0.90563	0.90559	0.999996	17198	0	-0.22758	-1.51443
PQLC2L	4	0.030608	0.079444	0.991261	1512	1	0.063418	0.24158	0.37469	0.999996	7121	2	0.063418	-1.51417
CHMP4C	4	0.030623	0.07947	0.991261	1513	2	-0.24981	0.83736	0.83753	0.999996	15920	0	-0.24981	-1.51395
VCX3A	4	0.030658	0.079556	0.991261	1514	3	-0.12691	0.95873	0.95881	0.999996	18286	0	-0.12691	-1.51346
NOL8	4	0.030659	0.079556	0.991261	1515	3	-0.23948	0.92596	0.92591	0.999996	17633	0	-0.23948	-1.51344
ALG14	4	0.030678	0.079606	0.991261	1516	2	-0.19275	0.61364	0.65772	0.999996	12472	1	-0.19275	-1.51317
RPA2	4	0.030688	0.079626	0.991261	1517	3	-0.22333	0.64146	0.67517	0.999996	12798	1	-0.22333	-1.51303
SPDYE4	4	0.030693	0.079643	0.991261	1518	2	-0.062808	0.78243	0.78307	0.999996	14885	1	-0.062808	-1.51296
KIAA0930	4	0.030707	0.079675	0.991261	1519	3	-0.16234	0.98491	0.98501	0.999996	18786	0	-0.16234	-1.51276
SLC35F2	4	0.030707	0.079675	0.991261	1520	3	-0.132	0.94057	0.94055	0.999996	17926	0	-0.132	-1.51276
TSC2	4	0.030709	0.079679	0.991261	1521	2	-0.20064	0.80027	0.80032	0.999996	15230	1	-0.20064	-1.51273
BAALC	4	0.030728	0.079709	0.991261	1522	3	-0.23067	0.30253	0.44041	0.999996	8359	1	-0.23067	-1.51247
SCG2	4	0.030758	0.079773	0.991261	1523	3	-0.18336	0.23889	0.37183	0.999996	7064	1	-0.18336	-1.51204
CBX7	4	0.030759	0.079777	0.991261	1524	2	-0.096132	0.23787	0.37074	0.999996	7040	2	-0.096132	-1.51203
USP17L21	4	0.03081	0.079889	0.991261	1525	1	0.0043055	0.55936	0.62657	0.999996	11891	1	0.0043055	-1.51131
SFTPB	4	0.030853	0.08	0.991261	1526	2	-0.016247	0.14242	0.26802	0.993956	5141	2	-0.016247	-1.5107
DENND2A	4	0.030873	0.080044	0.991261	1527	2	-0.073969	0.079559	0.17688	0.986532	3408	1	-0.073969	-1.51042
ZNF586	4	0.030883	0.080068	0.991261	1528	3	-0.28275	0.98277	0.98287	0.999996	18728	0	-0.28275	-1.51028
LOC400736	4	0.030903	0.080108	0.991261	1529	2	-0.020946	0.26321	0.39796	0.999996	7580	2	-0.020946	-1.51
SCT	4	0.030911	0.080122	0.991261	1530	2	-0.23555	0.24057	0.3736	0.999996	7102	1	-0.23555	-1.50989
PDE6A	4	0.030913	0.080127	0.991261	1531	2	-0.15464	0.12196	0.24582	0.992603	4729	1	-0.15464	-1.50986
TBC1D3L	4	0.030961	0.080237	0.991261	1532	2	-0.39019	0.88414	0.88421	0.999996	16796	0	-0.39019	-1.50919
ABCD2	4	0.031003	0.080305	0.991261	1533	3	-0.1847	0.74117	0.74718	0.999996	14173	1	-0.1847	-1.5086
FGF3	4	0.031011	0.080329	0.991261	1534	2	-0.013258	0.10763	0.22822	0.987201	4418	2	-0.013258	-1.50848
IL17B	4	0.031062	0.080427	0.991261	1535	3	-0.15133	0.98861	0.98868	0.999996	18871	0	-0.15133	-1.50777
HUNK	4	0.031101	0.080515	0.991261	1536	3	-0.26192	0.85159	0.85167	0.999996	16182	0	-0.26192	-1.50723
PLCB2	4	0.031112	0.080539	0.991261	1537	1	0.04599	0.24326	0.37646	0.999996	7158	2	0.04599	-1.50707
CDH23	4	0.031214	0.080749	0.991261	1538	3	-0.19256	0.96255	0.96265	0.999996	18353	0	-0.19256	-1.50565
RASL11B	4	0.031225	0.080773	0.991261	1539	3	-0.13486	0.98605	0.98612	0.999996	18815	0	-0.13486	-1.5055
TMEM89	4	0.031264	0.080847	0.991261	1540	1	-0.04909	0.47591	0.58399	0.999996	11085	1	-0.04909	-1.50496
CALHM3	4	0.031279	0.080866	0.991261	1541	3	-0.24963	0.82398	0.82411	0.999996	15648	0	-0.24963	-1.50475
FNBP1L	4	0.031314	0.080941	0.991261	1542	3	-0.24659	0.96111	0.96118	0.999996	18325	0	-0.24659	-1.50426
DNAJB8	4	0.03135	0.081026	0.991261	1543	3	-0.14995	0.98143	0.98153	0.999996	18700	0	-0.14995	-1.50376
CUL2	4	0.031364	0.081055	0.991261	1544	2	-0.2366	0.49838	0.59493	0.999996	11282	1	-0.2366	-1.50357
DLST	4	0.031377	0.081074	0.991261	1545	3	-0.33029	0.78239	0.78303	0.999996	14883	1	-0.33029	-1.50339
CDYL2	4	0.031415	0.081167	0.991261	1546	3	-0.13419	0.11118	0.23429	0.98913	4522	1	-0.13419	-1.50286
ST3GAL1	4	0.031415	0.081168	0.991261	1547	3	-0.18593	0.96664	0.96674	0.999996	18423	0	-0.18593	-1.50286
GGNBP2	4	0.03142	0.081178	0.991261	1548	2	-0.27547	0.68601	0.70511	0.999996	13365	1	-0.27547	-1.50279
DMKN	4	0.03142	0.081178	0.991261	1549	3	-0.22345	0.65346	0.68295	0.999996	12935	1	-0.22345	-1.50279
PRMT8	4	0.031465	0.081269	0.991261	1550	1	0.040061	0.39084	0.53468	0.999996	10176	1	0.040061	-1.50217
TAS2R38	4	0.031469	0.081273	0.991261	1551	3	-0.27129	0.96745	0.96754	0.999996	18440	0	-0.27129	-1.50212
IGIP	4	0.031499	0.081333	0.991261	1552	3	-0.15988	0.95596	0.95598	0.999996	18237	0	-0.15988	-1.5017
CT47A5	4	0.031512	0.081358	0.991261	1553	3	-0.11233	0.98475	0.98485	0.999996	18782	0	-0.11233	-1.50152
TM4SF4	4	0.031516	0.081366	0.991261	1554	2	-0.016878	0.071231	0.16095	0.986532	3099	1	-0.016878	-1.50147
ZIC2	4	0.031545	0.081431	0.991261	1555	3	-0.15669	0.94996	0.95004	0.999996	18123	0	-0.15669	-1.50107
CHST1	4	0.031556	0.081448	0.991261	1556	2	-0.17523	0.87786	0.87788	0.999996	16664	0	-0.17523	-1.50092
ACYP2	4	0.031566	0.081468	0.991261	1557	2	-0.2207	0.97032	0.97043	0.999996	18486	0	-0.2207	-1.50078
SHMT2	4	0.031567	0.081468	0.991261	1558	3	-0.14724	0.91711	0.91709	0.999996	17435	0	-0.14724	-1.50077
TMEM106A	4	0.031617	0.081567	0.991261	1559	2	-0.1083	0.96355	0.96363	0.999996	18371	0	-0.1083	-1.50008
MORF4L2	4	0.031664	0.081672	0.991261	1560	3	-0.1567	0.95824	0.95832	0.999996	18272	0	-0.1567	-1.49943
DMBX1	4	0.031667	0.081678	0.991261	1561	1	-0.35696	0.94879	0.94886	0.999996	18102	0	-0.35696	-1.49939
WTH3DI	4	0.031692	0.081728	0.991261	1562	3	-0.21359	0.77762	0.77864	0.999996	14803	1	-0.21359	-1.49905
TSPAN10	4	0.031717	0.08178	0.991261	1563	2	-0.066713	0.77814	0.77913	0.999996	14811	1	-0.066713	-1.49871
ADGRE2	4	0.031739	0.081826	0.991261	1564	2	-0.10803	0.83455	0.8347	0.999996	15857	0	-0.10803	-1.49841
SENP6	4	0.031799	0.081934	0.991261	1565	2	-0.20475	0.21625	0.34757	0.999996	6617	2	-0.20475	-1.49759
PDZD4	4	0.031809	0.081967	0.991261	1566	2	0.013897	0.022864	0.063678	0.97304	1247	2	0.013897	-1.49745
FAM13A	4	0.031818	0.081985	0.991261	1567	2	-0.23529	0.90912	0.90909	0.999996	17271	0	-0.23529	-1.49733
ASL	4	0.031834	0.082022	0.991261	1568	3	-0.18012	0.9706	0.97073	0.999996	18496	0	-0.18012	-1.49711
IRAK4	4	0.03186	0.082084	0.991261	1569	2	-0.085726	0.071524	0.16152	0.986532	3113	1	-0.085726	-1.49675
CLDN10	4	0.031891	0.082142	0.991261	1570	2	-0.083332	0.6454	0.67768	0.999996	12837	1	-0.083332	-1.49633
KCTD2	4	0.031919	0.082211	0.991261	1571	2	-0.071662	0.016197	0.049307	0.961704	979	1	-0.071662	-1.49595
CCDC88B	4	0.031946	0.082266	0.991261	1572	3	-0.2759	0.79246	0.79258	0.999996	15087	1	-0.2759	-1.49558
NCF2	4	0.031962	0.082295	0.991261	1573	2	-0.063269	0.57357	0.63447	0.999996	12042	1	-0.063269	-1.49537
TAS1R1	4	0.03197	0.08231	0.991261	1574	1	-0.020259	0.60034	0.64971	0.999996	12328	1	-0.020259	-1.49526
C1orf27	4	0.032012	0.0824	0.991261	1575	2	-0.2585	0.39091	0.53475	0.999996	10178	1	-0.2585	-1.49469
OR8S1	4	0.03202	0.082412	0.991261	1576	2	-0.012899	0.26244	0.39714	0.999996	7559	2	-0.012899	-1.49458
GADD45GIP1	4	0.032022	0.082417	0.991261	1577	3	-0.29055	0.53285	0.61247	0.999996	11624	1	-0.29055	-1.49455
ARPC4-TTLL3	4	0.032033	0.082442	0.991261	1578	2	-0.19125	0.70626	0.71984	0.999996	13661	1	-0.19125	-1.4944
RPGRIP1	4	0.032042	0.082464	0.991261	1579	3	-0.22148	0.64299	0.67614	0.999996	12812	1	-0.22148	-1.49428
PLSCR1	4	0.032069	0.082529	0.991261	1580	3	-0.17323	0.58715	0.64212	0.999996	12174	1	-0.17323	-1.49391
SAR1B	4	0.03208	0.082557	0.991261	1581	3	-0.19553	0.78657	0.78697	0.999996	14960	1	-0.19553	-1.49377
MEP1B	4	0.032121	0.082632	0.991261	1582	2	-0.06961	0.79344	0.79351	0.999996	15101	1	-0.06961	-1.49321
SLC25A4	4	0.03214	0.082672	0.991261	1583	2	-0.24315	0.13003	0.25455	0.993956	4880	1	-0.24315	-1.49295
DOK3	4	0.032171	0.082744	0.991261	1584	1	-0.0037847	0.72629	0.73524	0.999996	13949	1	-0.0037847	-1.49254
LRRC37A3	4	0.032187	0.082768	0.991261	1585	3	-0.52903	0.97436	0.97449	0.999996	18564	0	-0.52903	-1.49232
FAM134B	4	0.032211	0.08282	0.991261	1586	2	-0.18869	0.91579	0.91574	0.999996	17411	0	-0.18869	-1.492
OPN1MW	4	0.032273	0.082957	0.991261	1587	3	-0.15967	0.91299	0.91294	0.999996	17345	0	-0.15967	-1.49116
CDH13	4	0.032328	0.08308	0.991261	1588	2	-0.20611	0.74745	0.75241	0.999996	14272	1	-0.20611	-1.49042
RTP3	4	0.032423	0.083252	0.991261	1589	2	-0.046513	0.24717	0.38069	0.999996	7260	2	-0.046513	-1.48915
IRGQ	4	0.03243	0.083271	0.991261	1590	3	-0.12693	0.63162	0.66882	0.999996	12675	1	-0.12693	-1.48905
RELL2	4	0.032474	0.083376	0.991261	1591	2	-0.088726	0.64189	0.67544	0.999996	12800	1	-0.088726	-1.48846
SUMO4	4	0.032477	0.083382	0.991261	1592	3	-0.16523	0.94594	0.94599	0.999996	18036	0	-0.16523	-1.48842
ABCC8	4	0.032481	0.083392	0.991261	1593	2	-0.056784	0.21022	0.34107	0.999996	6497	2	-0.056784	-1.48837
OR51I2	4	0.032521	0.083467	0.991261	1594	3	-0.12838	0.77254	0.77399	0.999996	14698	1	-0.12838	-1.48784
TLDC1	4	0.032524	0.083471	0.991261	1595	1	0.011128	0.27427	0.4099	0.999996	7789	2	0.011128	-1.4878
HTR2C	4	0.032532	0.083487	0.991261	1596	3	-0.22383	0.7909	0.79108	0.999996	15043	1	-0.22383	-1.48769
PLEKHG6	4	0.032577	0.083581	0.991261	1597	3	-0.207	0.98769	0.98775	0.999996	18851	0	-0.207	-1.48709
ZNF714	4	0.032614	0.083657	0.991261	1598	3	-0.23473	0.76615	0.76824	0.999996	14585	1	-0.23473	-1.4866
MYLK4	4	0.032625	0.083685	0.991261	1599	1	0.064146	0.32511	0.46451	0.999996	8835	2	0.064146	-1.48645
CRH	4	0.032665	0.083764	0.991261	1600	3	-0.17682	0.93095	0.93086	0.999996	17725	0	-0.17682	-1.48592
GABRA6	4	0.032675	0.08378	0.991261	1601	3	-0.10332	0.30595	0.44408	0.999996	8427	1	-0.10332	-1.48578
GOLGA7	4	0.032676	0.083781	0.991261	1602	2	-0.17753	0.96525	0.96535	0.999996	18394	0	-0.17753	-1.48577
MED16	4	0.032725	0.08389	0.991261	1603	2	-0.17407	0.46105	0.57686	0.999996	10965	1	-0.17407	-1.48512
RALA	4	0.032727	0.083892	0.991261	1604	3	-0.18048	0.50167	0.59658	0.999996	11326	1	-0.18048	-1.48509
SPC25	4	0.032735	0.08391	0.991261	1605	3	-0.29376	0.70339	0.71774	0.999996	13619	1	-0.29376	-1.48499
UBXN1	4	0.032779	0.084	0.991261	1606	2	-0.035142	0.23725	0.37007	0.999996	7028	2	-0.035142	-1.4844
OTOP2	4	0.032782	0.084005	0.991261	1607	3	-0.21774	0.56212	0.6281	0.999996	11918	1	-0.21774	-1.48436
RBL2	4	0.032801	0.084049	0.991261	1608	1	-0.0025979	0.29727	0.43469	0.999996	8256	2	-0.0025979	-1.48411
CCDC38	4	0.032804	0.084056	0.991261	1609	3	-0.15973	0.93543	0.93539	0.999996	17832	0	-0.15973	-1.48407
FNDC5	4	0.032809	0.084068	0.991261	1610	3	-0.20279	0.55167	0.62245	0.999996	11820	1	-0.20279	-1.48401
RPS6KC1	4	0.032816	0.084082	0.991261	1611	3	-0.21835	0.49216	0.59182	0.999996	11222	1	-0.21835	-1.48391
AQR	4	0.032827	0.084099	0.991261	1612	3	-0.3438	0.77239	0.77385	0.999996	14695	1	-0.3438	-1.48377
FAM122A	4	0.032827	0.084099	0.991261	1613	3	-0.23836	0.98473	0.98484	0.999996	18780	0	-0.23836	-1.48377
AHSA2	4	0.032877	0.084199	0.991261	1614	2	-0.072575	0.77174	0.77325	0.999996	14686	1	-0.072575	-1.48311
PIGH	4	0.032912	0.084267	0.991261	1615	2	-0.097772	0.45538	0.5741	0.999996	10911	1	-0.097772	-1.48265
CREM	4	0.032927	0.0843	0.991261	1616	2	-0.01838	0.081911	0.18125	0.986532	3502	2	-0.01838	-1.48245
OR13C8	4	0.03296	0.08438	0.991261	1617	3	-0.1813	0.83685	0.83701	0.999996	15909	0	-0.1813	-1.48201
H3F3A	4	0.032974	0.084412	0.991261	1618	3	-0.88483	0.98386	0.98398	0.999996	18752	0	-0.88483	-1.48183
SFR1	4	0.032977	0.084418	0.991261	1619	2	-0.33398	0.93339	0.93335	0.999996	17782	0	-0.33398	-1.48179
CCNK	4	0.032983	0.08443	0.991261	1620	3	-0.46538	0.98386	0.98398	0.999996	18761	0	-0.46538	-1.48171
NFYA	4	0.032995	0.08445	0.991261	1621	2	-0.17086	0.81693	0.81702	0.999996	15517	0	-0.17086	-1.48155
PCDHB6	4	0.033014	0.08449	0.991261	1622	3	-0.22869	0.94855	0.94863	0.999996	18097	0	-0.22869	-1.4813
TNP1	4	0.033067	0.084601	0.991261	1623	3	-0.29763	0.94308	0.94309	0.999996	17974	0	-0.29763	-1.48061
MCM9	4	0.033078	0.08462	0.991261	1624	2	-0.15023	0.95116	0.95129	0.999996	18145	0	-0.15023	-1.48046
ARHGEF15	4	0.033118	0.084712	0.991261	1625	2	-0.081579	0.169	0.2968	0.998747	5675	2	-0.081579	-1.47994
FRY	4	0.033128	0.084746	0.991261	1626	2	0.01594	0.17944	0.30801	0.998747	5891	2	0.01594	-1.4798
NPIPB3	4	0.033154	0.084805	0.991261	1627	2	-0.17369	0.85567	0.85579	0.999996	16249	0	-0.17369	-1.47946
VASH2	4	0.033179	0.084859	0.991261	1628	3	-0.11111	0.21618	0.34749	0.999996	6615	1	-0.11111	-1.47914
ATP5H	4	0.033179	0.084859	0.991261	1629	2	-0.24337	0.96772	0.9678	0.999996	18447	0	-0.24337	-1.47914
MYT1	4	0.033224	0.084961	0.991261	1630	3	-0.22708	0.9845	0.98462	0.999996	18775	0	-0.22708	-1.47855
OR2T10	4	0.033229	0.08497	0.991261	1631	2	-0.085833	0.38337	0.52669	0.999996	10029	2	-0.085833	-1.47848
LRRC52	4	0.033242	0.084998	0.991261	1632	2	0.066023	0.052869	0.1251	0.984816	2426	2	0.066023	-1.47831
HSPA1A	4	0.033294	0.08512	0.991261	1633	2	-0.20701	0.50774	0.59958	0.999996	11379	1	-0.20701	-1.47763
ST6GALNAC4	4	0.033314	0.085163	0.991261	1634	2	-0.11648	0.32238	0.46158	0.999996	8775	1	-0.11648	-1.47737
AP5B1	4	0.033325	0.085183	0.991261	1635	2	-0.086328	0.85762	0.85779	0.999996	16281	0	-0.086328	-1.47723
MAP4	4	0.03333	0.085193	0.991261	1636	1	-0.030432	0.23585	0.36863	0.999996	6999	1	-0.030432	-1.47716
HSP90AB1	4	0.03338	0.085303	0.991261	1637	2	-0.14507	0.93719	0.93714	0.999996	17869	0	-0.14507	-1.47651
KSR1	4	0.033403	0.085348	0.991261	1638	3	-0.20094	0.97669	0.97683	0.999996	18606	0	-0.20094	-1.47621
OR4C13	4	0.033426	0.085398	0.991261	1639	3	-0.19783	0.41012	0.55346	0.999996	10517	1	-0.19783	-1.47592
TMEM164	4	0.033428	0.085402	0.991261	1640	2	-0.18548	0.088024	0.19254	0.986532	3714	1	-0.18548	-1.47589
BTBD3	4	0.033431	0.085408	0.991261	1641	2	-0.08555	0.77144	0.77299	0.999996	14681	1	-0.08555	-1.47585
THY1	4	0.033471	0.085482	0.991261	1642	3	-0.1856	0.17787	0.30628	0.998747	5854	1	-0.1856	-1.47533
PLEKHN1	4	0.033481	0.085506	0.991261	1643	1	0.03091	0.18379	0.31275	0.999496	5975	1	0.03091	-1.4752
FOXD4	4	0.033531	0.08562	0.991261	1644	1	-0.022078	0.78997	0.79018	0.999996	15026	1	-0.022078	-1.47455
ZNF280C	4	0.033542	0.085645	0.991261	1645	2	-0.17122	0.62073	0.66212	0.999996	12548	1	-0.17122	-1.47441
SPECC1	4	0.033582	0.085728	0.991261	1646	3	-0.1564	0.88989	0.8899	0.999996	16891	0	-0.1564	-1.47389
DEFA4	4	0.033598	0.085765	0.991261	1647	3	-0.13415	0.98681	0.98689	0.999996	18829	0	-0.13415	-1.47369
NUDT5	4	0.033632	0.085847	0.991261	1648	2	-0.17539	0.1236	0.24761	0.992603	4766	1	-0.17539	-1.47325
DNAI2	4	0.033635	0.085855	0.991261	1649	3	-0.2545	0.8575	0.85767	0.999996	16278	0	-0.2545	-1.47321
LOC400863	4	0.033682	0.08596	0.991261	1650	1	-0.017783	0.8558	0.85593	0.999996	16252	0	-0.017783	-1.4726
ZIM2	4	0.033719	0.086038	0.991261	1651	2	-0.12626	0.72561	0.73467	0.999996	13938	1	-0.12626	-1.47213
PRCD	4	0.033745	0.086091	0.991261	1652	3	-0.24686	0.80479	0.80482	0.999996	15310	0	-0.24686	-1.47179
AP3B2	4	0.033783	0.08618	0.991261	1653	2	-0.090071	0.90609	0.90606	0.999996	17209	0	-0.090071	-1.4713
APOA1	4	0.033891	0.086394	0.991261	1654	2	-0.2143	0.57215	0.63367	0.999996	12030	1	-0.2143	-1.46992
GPSM3	4	0.033934	0.086499	0.991261	1655	1	0.090059	0.076761	0.17159	0.986532	3310	2	0.090059	-1.46936
ATAD5	4	0.033935	0.0865	0.991261	1656	3	-0.26233	0.95616	0.9562	0.999996	18240	0	-0.26233	-1.46935
SSTR2	4	0.033938	0.086506	0.991261	1657	2	-0.13585	0.83066	0.83081	0.999996	15772	0	-0.13585	-1.46931
RBL1	4	0.033969	0.086573	0.991261	1658	2	-0.26361	0.24426	0.37755	0.999996	7179	1	-0.26361	-1.46892
SEMA5A	4	0.033979	0.086592	0.991261	1659	2	-0.035126	0.22405	0.35593	0.999996	6769	2	-0.035126	-1.46879
TRAM1L1	4	0.034011	0.086659	0.991261	1660	2	-0.13491	0.87357	0.87364	0.999996	16586	0	-0.13491	-1.46838
MYO9B	4	0.034035	0.086706	0.991261	1661	3	-0.12747	0.5814	0.63884	0.999996	12115	1	-0.12747	-1.46807
SLCO4A1	4	0.034043	0.086726	0.991261	1662	3	-0.12197	0.91842	0.91839	0.999996	17470	0	-0.12197	-1.46797
GTF2H2	4	0.034077	0.086801	0.991261	1663	3	-0.36301	0.96694	0.96703	0.999996	18429	0	-0.36301	-1.46754
COL6A1	4	0.034085	0.08682	0.991261	1664	2	-0.11456	0.056385	0.13206	0.986258	2558	2	-0.11456	-1.46744
MAP3K1	4	0.034094	0.086845	0.991261	1665	2	-0.11833	0.34655	0.48741	0.999996	9273	1	-0.11833	-1.46732
HTN1	4	0.034115	0.086884	0.991261	1666	2	-0.058883	0.1958	0.32567	0.999996	6209	2	-0.058883	-1.46705
CXXC5	4	0.034123	0.0869	0.991261	1667	3	-0.15197	0.30438	0.4424	0.999996	8396	1	-0.15197	-1.46695
FERMT3	4	0.034135	0.08693	0.991261	1668	2	-0.43274	0.83156	0.83171	0.999996	15793	0	-0.43274	-1.4668
EFCAB7	4	0.034146	0.086955	0.991261	1669	2	-0.07339	0.51076	0.60114	0.999996	11407	1	-0.07339	-1.46666
DNAJC16	4	0.034183	0.087037	0.991261	1670	2	-0.22788	0.78792	0.78823	0.999996	14986	1	-0.22788	-1.46619
NF2	4	0.034186	0.087042	0.991261	1671	1	-0.038646	0.32184	0.46099	0.999996	8766	1	-0.038646	-1.46615
DIAPH1	4	0.034217	0.087108	0.991261	1672	3	-0.13835	0.92017	0.92018	0.999996	17496	0	-0.13835	-1.46576
ALS2CR11	4	0.034236	0.087147	0.991261	1673	1	0.050639	0.71179	0.72403	0.999996	13730	1	0.050639	-1.46552
DERL2	4	0.03426	0.087196	0.991261	1674	3	-0.13734	0.48082	0.58632	0.999996	11128	1	-0.13734	-1.46521
AHSA1	4	0.034277	0.087229	0.991261	1675	2	-0.052683	0.40187	0.54669	0.999996	10388	2	-0.052683	-1.465
IL17A	4	0.034286	0.087252	0.991261	1676	1	0.002726	0.36444	0.5064	0.999996	9633	2	0.002726	-1.46488
DNTT	4	0.034293	0.087261	0.991261	1677	2	-0.043109	0.32405	0.4634	0.999996	8812	2	-0.043109	-1.46479
NECAP2	4	0.034374	0.087421	0.991261	1678	3	-0.23345	0.82712	0.82727	0.999996	15705	0	-0.23345	-1.46377
DPF1	4	0.034387	0.087449	0.991261	1679	3	-0.21511	0.98535	0.98543	0.999996	18798	0	-0.21511	-1.46361
DHDDS	4	0.034398	0.087469	0.991261	1680	3	-0.32876	0.92603	0.92598	0.999996	17634	0	-0.32876	-1.46347
RNASE8	4	0.034437	0.087567	0.991261	1681	2	-0.068894	0.85984	0.86001	0.999996	16324	0	-0.068894	-1.46297
KCNB1	4	0.034478	0.087647	0.991261	1682	3	-0.14319	0.026666	0.071813	0.980459	1394	1	-0.14319	-1.46246
MAEL	4	0.034488	0.087671	0.991261	1683	2	-0.10366	0.83486	0.83499	0.999996	15863	0	-0.10366	-1.46233
PSPH	4	0.034503	0.087699	0.991261	1684	2	-0.10513	0.91491	0.91487	0.999996	17392	0	-0.10513	-1.46214
PDCD2L	4	0.034524	0.087738	0.991261	1685	3	-0.17585	0.87265	0.87272	0.999996	16569	0	-0.17585	-1.46188
C19orf35	4	0.034555	0.087796	0.991261	1686	2	-0.13724	0.33677	0.47692	0.999996	9082	1	-0.13724	-1.46149
LDB2	4	0.034587	0.087859	0.991261	1687	2	-0.12412	0.65931	0.68679	0.999996	13014	1	-0.12412	-1.46109
TMEM225	4	0.034588	0.08786	0.991261	1688	1	0.072503	0.28855	0.42528	0.999996	8070	2	0.072503	-1.46107
SDK1	4	0.034608	0.087894	0.991261	1689	2	-0.05435	0.45949	0.57609	0.999996	10949	1	-0.05435	-1.46082
PTPRE	4	0.03461	0.087898	0.991261	1690	3	-0.11471	0.919	0.91901	0.999996	17482	0	-0.11471	-1.4608
TEP1	4	0.034638	0.087956	0.991261	1691	1	-0.16631	0.94997	0.95004	0.999996	18124	0	-0.16631	-1.46045
IBTK	4	0.034639	0.087957	0.991261	1692	3	-0.12302	0.95057	0.95069	0.999996	18134	0	-0.12302	-1.46043
APIP	4	0.034667	0.088027	0.991261	1693	3	-0.27329	0.95666	0.95671	0.999996	18248	0	-0.27329	-1.46008
HDGFRP2	4	0.034689	0.08807	0.991261	1694	2	-0.096072	0.89221	0.8922	0.999996	16935	0	-0.096072	-1.45981
CCDC89	4	0.034739	0.088162	0.991261	1695	1	0.27144	0.039014	0.097538	0.980568	1885	3	0.27144	-1.45918
SMARCA2	4	0.03484	0.088355	0.991261	1696	2	-0.087768	0.41883	0.55736	0.999996	10600	1	-0.087768	-1.45792
CT47A7	4	0.03489	0.088457	0.991261	1697	1	0.10027	0.1235	0.24752	0.992603	4764	2	0.10027	-1.4573
TMEM235	4	0.03494	0.088556	0.991261	1698	1	-0.044405	0.90282	0.90281	0.999996	17147	0	-0.044405	-1.45668
CREB3	4	0.034947	0.088565	0.991261	1699	3	-0.12899	0.22015	0.35179	0.999996	6692	1	-0.12899	-1.45659
BASP1	4	0.034987	0.088656	0.991261	1700	3	-0.21375	0.98603	0.98611	0.999996	18814	0	-0.21375	-1.45609
RFC1	4	0.034991	0.088667	0.991261	1701	2	-0.24405	0.52056	0.60613	0.999996	11497	1	-0.24405	-1.45604
WBSCR27	4	0.035008	0.088694	0.991261	1702	2	-0.12233	0.32888	0.46854	0.999996	8922	1	-0.12233	-1.45583
KALRN	4	0.03503	0.088739	0.991261	1703	3	-0.21865	0.83897	0.83911	0.999996	15949	0	-0.21865	-1.45556
UQCRFS1	4	0.035041	0.088763	0.991261	1704	1	-0.47471	0.41509	0.55572	0.999996	10563	1	-0.47471	-1.45542
COLGALT1	4	0.035091	0.088868	0.991261	1705	1	-0.03764	0.88242	0.88249	0.999996	16760	0	-0.03764	-1.4548
AIM2	4	0.035141	0.088975	0.991261	1706	1	0.23415	0.01119	0.037318	0.941204	748	3	0.23415	-1.45419
C17orf64	4	0.035252	0.089224	0.991261	1707	2	-0.095159	0.48858	0.59008	0.999996	11188	1	-0.095159	-1.45282
WFDC8	4	0.035284	0.089301	0.991261	1708	2	-0.11201	0.69757	0.71345	0.999996	13539	1	-0.11201	-1.45242
KCNT2	4	0.035316	0.089359	0.991261	1709	3	-0.21611	0.87555	0.8756	0.999996	16621	0	-0.21611	-1.45203
PCGF5	4	0.035337	0.089398	0.991261	1710	2	-0.039357	0.12324	0.24723	0.992603	4756	2	-0.039357	-1.45177
LPAR1	4	0.035343	0.089415	0.991261	1711	2	-0.18558	0.49409	0.59275	0.999996	11239	1	-0.18558	-1.4517
NOL11	4	0.035393	0.089526	0.991261	1712	2	-0.11133	0.88932	0.88933	0.999996	16874	0	-0.11133	-1.45108
ATL2	4	0.035443	0.089629	0.991261	1713	2	-0.26132	0.88357	0.88364	0.999996	16788	0	-0.26132	-1.45047
LRRC56	4	0.035443	0.08963	0.991261	1714	2	-0.043256	0.77237	0.77383	0.999996	14694	1	-0.043256	-1.45047
SLC7A8	4	0.035462	0.089673	0.991261	1715	3	-0.26486	0.88726	0.88731	0.999996	16839	0	-0.26486	-1.45024
EIF2D	4	0.035477	0.089701	0.991261	1716	3	-0.18879	0.7509	0.75526	0.999996	14326	1	-0.18879	-1.45005
ARHGAP35	4	0.035501	0.089741	0.991261	1717	2	-0.0087066	0.049691	0.11883	0.982021	2308	2	-0.0087066	-1.44976
C2orf88	4	0.035544	0.089831	0.991261	1718	1	0.04834	0.38871	0.53245	0.999996	10141	2	0.04834	-1.44923
EPPIN-WFDC6	4	0.035644	0.090021	0.991261	1719	2	-0.074385	0.047402	0.11437	0.982021	2209	1	-0.074385	-1.44801
HIP1R	4	0.035666	0.090059	0.991261	1720	2	-0.1021	0.69107	0.70871	0.999996	13446	1	-0.1021	-1.44775
HERC3	4	0.035745	0.090225	0.991261	1721	1	0.061654	0.22737	0.35948	0.999996	6842	2	0.061654	-1.44678
CCDC61	4	0.035766	0.090264	0.991261	1722	3	-0.15409	0.13644	0.26155	0.993956	5019	1	-0.15409	-1.44653
GPR83	4	0.035795	0.090327	0.991261	1723	2	-0.20136	0.15389	0.28039	0.993956	5375	1	-0.20136	-1.44618
IFIT5	4	0.035845	0.090433	0.991261	1724	1	0.15759	0.1974	0.32739	0.999996	6241	2	0.15759	-1.44557
DMRT1	4	0.035854	0.090451	0.991261	1725	3	-0.18324	0.91853	0.91852	0.999996	17472	0	-0.18324	-1.44546
HLA-G	4	0.03586	0.090465	0.991261	1726	3	-0.18724	0.33533	0.47539	0.999996	9055	1	-0.18724	-1.44539
LRTM2	4	0.035881	0.090519	0.991261	1727	3	-0.13071	0.90465	0.90462	0.999996	17180	0	-0.13071	-1.44514
ZEB2	4	0.035893	0.090534	0.991261	1728	3	-0.26557	0.46436	0.5784	0.999996	10993	1	-0.26557	-1.44499
RHOBTB2	4	0.035895	0.090541	0.991261	1729	1	0.23704	0.016426	0.049823	0.966778	983	3	0.23704	-1.44497
MAGOHB	4	0.035912	0.090578	0.991261	1730	2	-0.17328	0.83642	0.83656	0.999996	15898	0	-0.17328	-1.44476
MPZL2	4	0.035946	0.090651	0.991261	1731	3	-0.19319	0.72955	0.73784	0.999996	13993	1	-0.19319	-1.44435
XKR4	4	0.035949	0.090659	0.991261	1732	3	-0.14269	0.92819	0.92814	0.999996	17674	0	-0.14269	-1.44431
RBP2	4	0.035949	0.090659	0.991261	1733	2	-0.045979	0.22174	0.35346	0.999996	6717	2	-0.045979	-1.44431
TSHB	4	0.035949	0.090659	0.991261	1734	2	-0.19683	0.27878	0.41476	0.999996	7877	1	-0.19683	-1.44431
KCNH3	4	0.035997	0.090744	0.991261	1735	3	-0.21493	0.33726	0.47743	0.999996	9093	1	-0.21493	-1.44373
FLVCR2	4	0.036019	0.090788	0.991261	1736	3	-0.13763	0.24864	0.38229	0.999996	7287	1	-0.13763	-1.44347
VSIG1	4	0.036037	0.090828	0.991261	1737	3	-0.12484	0.9882	0.98823	0.999996	18860	0	-0.12484	-1.44325
DNM3	4	0.036046	0.090852	0.991261	1738	3	-0.19202	0.36669	0.5088	0.999996	9682	1	-0.19202	-1.44314
CD5L	4	0.03609	0.090939	0.991261	1739	3	-0.15599	0.97668	0.97683	0.999996	18605	0	-0.15599	-1.44261
SAXO2	4	0.03612	0.090998	0.991261	1740	3	-0.208	0.38271	0.526	0.999996	10013	1	-0.208	-1.44225
PNMA3	4	0.036126	0.09101	0.991261	1741	3	-0.10335	0.95491	0.95498	0.999996	18217	0	-0.10335	-1.44218
ZNF747	4	0.036147	0.091048	0.991261	1742	2	-0.019766	0.17823	0.30667	0.998747	5866	1	-0.019766	-1.44193
FAM178B	4	0.036197	0.091151	0.991261	1743	2	-0.063951	0.78411	0.78465	0.999996	14918	1	-0.063951	-1.44133
ST7L	4	0.036202	0.091165	0.991261	1744	3	-0.2691	0.80855	0.80864	0.999996	15376	0	-0.2691	-1.44127
LUC7L3	4	0.036247	0.091252	0.991261	1745	2	-0.3438	0.95894	0.95901	0.999996	18293	0	-0.3438	-1.44073
ZNF655	4	0.036255	0.091261	0.991261	1746	2	-0.15678	0.68715	0.70587	0.999996	13386	1	-0.15678	-1.44063
GPR12	4	0.036281	0.091314	0.991261	1747	2	-0.21759	0.88283	0.88289	0.999996	16767	0	-0.21759	-1.44032
PIF1	4	0.036297	0.091347	0.991261	1748	1	-0.15661	0.072062	0.16257	0.986532	3135	2	-0.15661	-1.44013
NFKBIL1	4	0.0363	0.091349	0.991261	1749	3	-0.17032	0.74201	0.74785	0.999996	14190	1	-0.17032	-1.44009
DNAH12	4	0.036303	0.091354	0.991261	1750	2	-0.17535	0.084984	0.18688	0.986532	3606	1	-0.17535	-1.44006
JUND	4	0.036348	0.091446	0.991261	1751	2	-0.070858	0.54115	0.61684	0.999996	11703	1	-0.070858	-1.43952
OR5A2	4	0.036398	0.091547	0.991261	1752	2	-0.089826	0.56848	0.6316	0.999996	11994	1	-0.089826	-1.43892
USE1	4	0.036431	0.091623	0.991261	1753	3	-0.15194	0.94721	0.94725	0.999996	18075	0	-0.15194	-1.43853
USP19	4	0.036448	0.091659	0.991261	1754	3	-0.16178	0.86326	0.86338	0.999996	16385	0	-0.16178	-1.43833
DHX34	4	0.036459	0.091681	0.991261	1755	2	-0.15126	0.88727	0.88733	0.999996	16840	0	-0.15126	-1.4382
S100A3	4	0.036463	0.091689	0.991261	1756	3	-0.1378	0.71512	0.72647	0.999996	13773	1	-0.1378	-1.43815
ROPN1L	4	0.036545	0.091843	0.991261	1757	2	-0.23226	0.056138	0.13158	0.985808	2551	1	-0.23226	-1.43717
ZFPM2	4	0.036549	0.091851	0.991261	1758	1	0.048764	0.1817	0.31046	0.999496	5933	1	0.048764	-1.43712
INS	4	0.036556	0.091864	0.991261	1759	2	-0.11993	0.88265	0.88271	0.999996	16764	0	-0.11993	-1.43704
SORT1	4	0.036599	0.091955	0.991261	1760	2	-0.10952	0.34457	0.48528	0.999996	9231	2	-0.10952	-1.43653
LSS	4	0.036615	0.091986	0.991261	1761	3	-0.3332	0.94734	0.94739	0.999996	18079	0	-0.3332	-1.43634
SCRIB	4	0.036631	0.092016	0.991261	1762	2	-0.1234	0.75892	0.76201	0.999996	14465	1	-0.1234	-1.43615
UNC45B	4	0.036645	0.092036	0.991261	1763	3	-0.25708	0.74266	0.7484	0.999996	14203	1	-0.25708	-1.43599
TRIM7	4	0.036665	0.092068	0.991261	1764	3	-0.13921	0.83526	0.83538	0.999996	15869	0	-0.13921	-1.43575
NFKB1	4	0.036699	0.092128	0.991261	1765	1	-0.0004159	0.54213	0.61731	0.999996	11716	1	-0.0004159	-1.43535
ITGB5	4	0.036749	0.092235	0.991261	1766	1	-0.022693	0.85039	0.85047	0.999996	16155	0	-0.022693	-1.43475
KRT36	4	0.036761	0.092263	0.991261	1767	3	-0.12454	0.9883	0.98834	0.999996	18863	0	-0.12454	-1.43461
HSF1	4	0.036776	0.09229	0.991261	1768	3	-0.19539	0.9865	0.98657	0.999996	18822	0	-0.19539	-1.43444
ANKRD7	4	0.036788	0.09231	0.991261	1769	3	-0.21783	0.97817	0.9783	0.999996	18639	0	-0.21783	-1.43429
NAP1L1	4	0.036879	0.092488	0.991261	1770	2	-0.071434	0.13951	0.26481	0.993956	5081	2	-0.071434	-1.43322
ATP4B	4	0.036896	0.092525	0.991261	1771	2	-0.079155	0.35039	0.4915	0.999996	9358	2	-0.079155	-1.43302
SNTG2	4	0.0369	0.092535	0.991261	1772	2	0.070636	0.11748	0.24101	0.991111	4645	2	0.070636	-1.43297
POLR2G	4	0.036904	0.092542	0.991261	1773	3	-0.24138	0.9448	0.94486	0.999996	18011	0	-0.24138	-1.43293
FAM118B	4	0.036912	0.092556	0.991261	1774	2	-0.077834	0.26035	0.39483	0.999996	7525	2	-0.077834	-1.43283
OR4N2	4	0.03695	0.092633	0.991261	1775	1	-0.013899	0.79506	0.79511	0.999996	15130	1	-0.013899	-1.43239
TAF1A	4	0.037001	0.092746	0.991261	1776	2	-0.23631	0.94056	0.94054	0.999996	17925	0	-0.23631	-1.43179
UBA5	4	0.037051	0.092852	0.991261	1777	3	-0.40901	0.38275	0.52605	0.999996	10014	1	-0.40901	-1.4312
VGLL4	4	0.037101	0.092962	0.991261	1778	2	-0.089	0.808	0.80809	0.999996	15370	0	-0.089	-1.43061
SLC2A9	4	0.037118	0.092995	0.991261	1779	2	-0.19678	0.93438	0.93431	0.999996	17810	0	-0.19678	-1.43042
MND1	4	0.037151	0.09307	0.991261	1780	1	-0.089956	0.7255	0.73459	0.999996	13935	1	-0.089956	-1.43003
NANOS3	4	0.037172	0.093121	0.991261	1781	2	-0.10814	0.86222	0.86236	0.999996	16365	0	-0.10814	-1.42978
BDKRB1	4	0.037183	0.093139	0.991261	1782	3	-0.11059	0.78574	0.78615	0.999996	14945	1	-0.11059	-1.42966
SEMG1	4	0.037193	0.093158	0.991261	1783	2	-0.046449	0.383	0.52629	0.999996	10020	1	-0.046449	-1.42954
MARCHF5	4	0.037201	0.093176	0.991261	1784	2	-0.1853	0.79634	0.79636	0.999996	15160	1	-0.1853	-1.42945
MRS2	4	0.037228	0.093233	0.991261	1785	3	-0.25142	0.93046	0.93035	0.999996	17717	0	-0.25142	-1.42913
METTL21A	4	0.037252	0.093277	0.991261	1786	2	-0.066702	0.86628	0.86639	0.999996	16443	0	-0.066702	-1.42885
CIB3	4	0.037252	0.09328	0.991261	1787	3	-0.25708	0.92837	0.92833	0.999996	17676	0	-0.25708	-1.42885
ABHD5	4	0.037351	0.093489	0.991261	1788	3	-0.40506	0.90973	0.90967	0.999996	17284	0	-0.40506	-1.4277
SAA2	4	0.037352	0.093493	0.991261	1789	3	-0.35673	0.9559	0.95594	0.999996	18236	0	-0.35673	-1.42769
GIPC3	4	0.037389	0.093568	0.991261	1790	2	-0.13828	0.89558	0.89561	0.999996	16997	0	-0.13828	-1.42726
TKTL1	4	0.037397	0.093584	0.991261	1791	3	-0.15164	0.51997	0.60585	0.999996	11489	1	-0.15164	-1.42716
C21orf62	4	0.037402	0.093599	0.991261	1792	2	-0.22732	0.50949	0.60049	0.999996	11392	1	-0.22732	-1.42711
OR52N4	4	0.037443	0.09368	0.991261	1793	2	-0.128	0.88421	0.88428	0.999996	16797	0	-0.128	-1.42663
DNAH8	4	0.037553	0.09393	0.991261	1794	1	-0.01833	0.76929	0.77109	0.999996	14642	1	-0.01833	-1.42536
PTF1A	4	0.037563	0.093953	0.991261	1795	3	-0.17697	0.98142	0.98152	0.999996	18699	0	-0.17697	-1.42524
MYL2	4	0.037596	0.09401	0.991261	1796	3	-0.1538	0.7133	0.72512	0.999996	13751	1	-0.1538	-1.42486
APOBEC3D	4	0.037607	0.094033	0.991261	1797	2	-0.17808	0.25846	0.39279	0.999996	7484	2	-0.17808	-1.42473
TCAF1	4	0.037639	0.094108	0.991261	1798	3	-0.33027	0.7864	0.78682	0.999996	14957	1	-0.33027	-1.42436
CPN1	4	0.037661	0.09416	0.991261	1799	2	-0.055811	0.17044	0.29838	0.998747	5698	1	-0.055811	-1.42411
PPM1H	4	0.037681	0.094208	0.991261	1800	3	-0.20255	0.98503	0.98512	0.999996	18789	0	-0.20255	-1.42388
GLI3	4	0.037683	0.094212	0.991261	1801	2	-0.1483	0.31731	0.45616	0.999996	8663	1	-0.1483	-1.42385
FBP2	4	0.03769	0.094222	0.991261	1802	3	-0.22726	0.7593	0.76231	0.999996	14474	1	-0.22726	-1.42377
IRX2	4	0.037703	0.094256	0.991261	1803	3	-0.11001	0.83657	0.83672	0.999996	15904	0	-0.11001	-1.42362
CD28	4	0.037721	0.094293	0.991261	1804	2	-0.13854	0.74629	0.75143	0.999996	14255	1	-0.13854	-1.42342
MRLN	4	0.037804	0.094462	0.991261	1805	1	0.089863	0.26256	0.39726	0.999996	7562	2	0.089863	-1.42246
ELF4	4	0.037858	0.094573	0.991261	1806	2	-0.10997	0.86149	0.86165	0.999996	16353	0	-0.10997	-1.42184
ZAR1	4	0.037879	0.094618	0.991261	1807	3	-0.22878	0.8139	0.814	0.999996	15460	0	-0.22878	-1.4216
TMEM199	4	0.037894	0.094649	0.991261	1808	3	-0.31938	0.9529	0.95302	0.999996	18182	0	-0.31938	-1.42143
GSTP1	4	0.037904	0.094674	0.991261	1809	1	0.11459	0.093719	0.20303	0.986532	3918	2	0.11459	-1.42131
PDE4A	4	0.037913	0.094688	0.991261	1810	2	-0.097925	0.31249	0.45112	0.999996	8559	1	-0.097925	-1.42121
CASP10	4	0.037933	0.094725	0.991261	1811	3	-0.21077	0.93881	0.93879	0.999996	17896	0	-0.21077	-1.42098
TRAFD1	4	0.037994	0.094854	0.991261	1812	3	-0.25437	0.97894	0.97909	0.999996	18654	0	-0.25437	-1.42028
PRR15	4	0.038	0.094863	0.991261	1813	2	-0.21057	0.91247	0.91244	0.999996	17335	0	-0.21057	-1.42022
SLX4	4	0.038004	0.094871	0.991261	1814	2	-0.13925	0.52056	0.60613	0.999996	11498	1	-0.13925	-1.42017
SH2B3	4	0.038055	0.094988	0.991261	1815	1	0.017348	0.79517	0.79521	0.999996	15134	1	0.017348	-1.41959
INHBA	4	0.038055	0.09499	0.991261	1816	3	-0.16864	0.8005	0.80054	0.999996	15239	1	-0.16864	-1.41959
PABPC1L	4	0.038082	0.095047	0.991261	1817	2	-0.062229	0.29155	0.4285	0.999996	8134	2	-0.062229	-1.41928
DERL1	4	0.038095	0.095071	0.991261	1818	3	-0.14476	0.94299	0.94302	0.999996	17972	0	-0.14476	-1.41913
IZUMO1R	4	0.038105	0.09509	0.991261	1819	1	0.040159	0.1099	0.23228	0.98913	4484	2	0.040159	-1.41902
IQSEC2	4	0.03811	0.095102	0.991261	1820	3	-0.15022	0.82477	0.82491	0.999996	15665	0	-0.15022	-1.41896
ZNF513	4	0.038155	0.0952	0.991261	1821	2	0.0063065	0.32528	0.4647	0.999996	8839	2	0.0063065	-1.41845
GAGE1	4	0.038205	0.095303	0.991261	1822	1	0.033406	0.40098	0.54574	0.999996	10369	2	0.033406	-1.41788
RAC2	4	0.03822	0.095335	0.991261	1823	3	-0.2463	0.98855	0.9886	0.999996	18870	0	-0.2463	-1.41771
ZCCHC2	4	0.038254	0.095394	0.991261	1824	3	-0.23548	0.36245	0.5043	0.999996	9596	1	-0.23548	-1.41732
GNG7	4	0.038255	0.095396	0.991261	1825	2	-0.026859	0.396	0.5403	0.999996	10275	2	-0.026859	-1.41731
RPL38	4	0.038305	0.095491	0.991261	1826	1	0.034618	0.77498	0.77619	0.999996	14752	1	0.034618	-1.41674
HIST1H3F	4	0.038319	0.095515	0.991261	1827	3	-0.20823	0.89293	0.89295	0.999996	16952	0	-0.20823	-1.41659
UTP20	4	0.03833	0.095543	0.991261	1828	2	0.028532	0.52537	0.60863	0.999996	11553	1	0.028532	-1.41646
TMEM119	4	0.038351	0.095586	0.991261	1829	2	-0.12357	0.026919	0.072362	0.980459	1405	2	-0.12357	-1.41622
OR1J1	4	0.038356	0.095595	0.991261	1830	3	-0.16186	0.92706	0.92704	0.999996	17653	0	-0.16186	-1.41617
SPATA12	4	0.038384	0.095658	0.991261	1831	3	-0.15717	0.89668	0.89669	0.999996	17020	0	-0.15717	-1.41585
PDCD10	4	0.038406	0.0957	0.991261	1832	2	-0.018628	0.49109	0.5913	0.999996	11212	1	-0.018628	-1.4156
C10orf113	4	0.03844	0.095767	0.991261	1833	3	-0.19057	0.94854	0.94862	0.999996	18096	0	-0.19057	-1.41522
RPRD1B	4	0.03849	0.095859	0.991261	1834	3	-0.35894	0.97599	0.97614	0.999996	18594	0	-0.35894	-1.41465
CNIH2	4	0.038511	0.095907	0.991261	1835	3	-0.128	0.36651	0.50861	0.999996	9677	1	-0.128	-1.41442
VPRBP	4	0.038511	0.095907	0.991261	1836	2	-0.54918	0.64914	0.68016	0.999996	12890	1	-0.54918	-1.41442
MTRNR2L3	4	0.038556	0.096001	0.991261	1837	3	-0.11693	0.70932	0.72219	0.999996	13699	1	-0.11693	-1.41391
TXNDC11	4	0.038572	0.096037	0.991261	1838	3	-0.13501	0.96015	0.96021	0.999996	18314	0	-0.13501	-1.41373
C10orf126	4	0.038582	0.096058	0.991261	1839	3	-0.29879	0.51488	0.60323	0.999996	11442	1	-0.29879	-1.41362
SEMA3C	4	0.038606	0.0961	0.991261	1840	2	-0.092136	0.80234	0.80238	0.999996	15269	0	-0.092136	-1.41335
PACSIN2	4	0.038646	0.096183	0.991261	1841	3	-0.17359	0.5759	0.6358	0.999996	12069	1	-0.17359	-1.4129
GABRR3	4	0.038657	0.096206	0.991261	1842	2	-0.0059094	0.44718	0.57028	0.999996	10842	1	-0.0059094	-1.41277
CREG1	4	0.038671	0.096243	0.991261	1843	3	-0.18018	0.73993	0.74616	0.999996	14152	1	-0.18018	-1.41261
HCFC1	4	0.03868	0.096263	0.991261	1844	3	-0.65949	0.98386	0.98398	0.999996	18750	0	-0.65949	-1.41251
MYL3	4	0.038707	0.096317	0.991261	1845	3	-0.087389	0.97984	0.97996	0.999996	18672	0	-0.087389	-1.41221
DPP9-AS1	4	0.038733	0.096372	0.991261	1846	3	-0.14206	0.28418	0.42054	0.999996	7999	1	-0.14206	-1.41192
CRCT1	4	0.038751	0.096418	0.991261	1847	3	-0.082913	0.96569	0.9658	0.999996	18401	0	-0.082913	-1.41172
LEMD2	4	0.038757	0.096429	0.991261	1848	2	-0.11174	0.55538	0.62446	0.999996	11852	1	-0.11174	-1.41165
C4orf32	4	0.038759	0.096435	0.991261	1849	3	-0.1498	0.80974	0.80984	0.999996	15398	0	-0.1498	-1.41163
PCDH17	4	0.038815	0.096557	0.991261	1850	2	-0.10923	0.16801	0.29571	0.998747	5657	1	-0.10923	-1.411
ZFP36L2	4	0.038837	0.096604	0.991261	1851	3	-0.17756	0.97691	0.97704	0.999996	18613	0	-0.17756	-1.41075
MYH6	4	0.038857	0.096645	0.991261	1852	1	0.069279	0.58413	0.64037	0.999996	12142	1	0.069279	-1.41053
GPRIN3	4	0.038907	0.096742	0.991261	1853	1	0.06732	0.17307	0.3012	0.998747	5760	2	0.06732	-1.40997
ERICH6	4	0.038925	0.096784	0.991261	1854	3	-0.11257	0.97059	0.97072	0.999996	18494	0	-0.11257	-1.40977
STAMBPL1	4	0.039007	0.096965	0.991261	1855	3	-0.21363	0.92607	0.92602	0.999996	17636	0	-0.21363	-1.40886
KRTAP1-1	4	0.039058	0.097075	0.991261	1856	3	-0.11866	0.92318	0.92323	0.999996	17567	0	-0.11866	-1.40829
KRTAP19-5	4	0.039108	0.097182	0.991261	1857	1	0.088939	0.35394	0.49524	0.999996	9437	2	0.088939	-1.40773
SLC29A2	4	0.039114	0.097189	0.991261	1858	2	-0.13936	0.24835	0.38197	0.999996	7284	1	-0.13936	-1.40767
SYTL5	4	0.039147	0.09726	0.991261	1859	3	-0.17717	0.3664	0.5085	0.999996	9673	1	-0.17717	-1.4073
LIN7C	4	0.039258	0.097479	0.991261	1860	3	-0.25648	0.95306	0.95317	0.999996	18188	0	-0.25648	-1.40607
BFAR	4	0.039302	0.097574	0.991261	1861	2	-0.061166	0.16351	0.29084	0.996549	5578	2	-0.061166	-1.40559
OTOG	4	0.039308	0.097591	0.991261	1862	1	0.024983	0.82355	0.82364	0.999996	15637	0	0.024983	-1.40552
SURF4	4	0.039409	0.097785	0.991261	1863	1	0.04381	0.47899	0.58548	0.999996	11116	1	0.04381	-1.4044
MOK	4	0.03943	0.097836	0.991261	1864	2	-0.10396	0.72327	0.73282	0.999996	13896	1	-0.10396	-1.40417
UBTF	4	0.03943	0.097836	0.991261	1865	2	-0.071424	0.07974	0.17721	0.986532	3416	2	-0.071424	-1.40417
GPR15	4	0.039447	0.097871	0.991261	1866	3	-0.14318	0.98687	0.98694	0.999996	18830	0	-0.14318	-1.40399
FCN1	4	0.039509	0.098002	0.991261	1867	2	-0.15643	0.3817	0.52492	0.999996	9991	1	-0.15643	-1.4033
SYMPK	4	0.039519	0.098021	0.991261	1868	2	-0.16823	0.63027	0.66797	0.999996	12659	1	-0.16823	-1.40319
KCNMB4	4	0.039545	0.09807	0.991261	1869	3	-0.11305	0.64034	0.67445	0.999996	12781	1	-0.11305	-1.40291
VMO1	4	0.039547	0.098079	0.991261	1870	3	-0.13079	0.94696	0.94699	0.999996	18068	0	-0.13079	-1.40289
RAB11FIP1	4	0.039559	0.098103	0.991261	1871	3	-0.20788	0.5206	0.60615	0.999996	11499	1	-0.20788	-1.40275
KIF1B	4	0.039564	0.09811	0.991261	1872	3	-0.19608	0.98214	0.98222	0.999996	18714	0	-0.19608	-1.4027
UPRT	4	0.039604	0.098198	0.991261	1873	3	-0.23285	0.97987	0.97999	0.999996	18673	0	-0.23285	-1.40226
XDH	4	0.039609	0.098209	0.991261	1874	1	0.075314	0.017676	0.052549	0.966778	1031	2	0.075314	-1.40221
KCNB2	4	0.039659	0.098311	0.991261	1875	1	0.097654	0.037403	0.094179	0.980568	1822	3	0.097654	-1.40166
WDR12	4	0.039673	0.098338	0.991261	1876	3	-0.61874	0.10216	0.2184	0.987119	4219	1	-0.61874	-1.4015
SYCP2	4	0.039703	0.098405	0.991261	1877	2	-0.14476	0.9505	0.9506	0.999996	18132	0	-0.14476	-1.40118
CLDN9	4	0.03972	0.098439	0.991261	1878	3	-0.23582	0.8876	0.88762	0.999996	16844	0	-0.23582	-1.40099
ATP6V0A4	4	0.039809	0.098622	0.991261	1879	1	0.0018895	0.51453	0.60307	0.999996	11439	1	0.0018895	-1.40002
SHC4	4	0.039811	0.098624	0.991261	1880	3	-0.3473	0.7021	0.7168	0.999996	13608	1	-0.3473	-1.4
PACS1	4	0.03982	0.098643	0.991261	1881	3	-0.24825	0.59714	0.64785	0.999996	12291	1	-0.24825	-1.3999
NANOS1	4	0.039859	0.098725	0.991261	1882	2	-0.014192	0.81871	0.8188	0.999996	15547	0	-0.014192	-1.39947
HTR3C	4	0.039871	0.098753	0.991261	1883	3	-0.14639	0.041512	0.10255	0.980568	1993	1	-0.14639	-1.39934
RC3H2	4	0.039877	0.098762	0.991261	1884	3	-0.12134	0.41076	0.55375	0.999996	10520	1	-0.12134	-1.39928
FRA10AC1	4	0.039927	0.098859	0.991261	1885	2	-0.15408	0.11028	0.23296	0.98913	4494	1	-0.15408	-1.39873
LMO3	4	0.039927	0.09886	0.991261	1886	3	-0.18464	0.83304	0.83318	0.999996	15828	0	-0.18464	-1.39873
TPRA1	4	0.039938	0.098882	0.991261	1887	2	-0.17805	0.94252	0.94252	0.999996	17958	0	-0.17805	-1.39861
C11orf24	4	0.03996	0.098926	0.991261	1888	1	0.0079518	0.3872	0.53082	0.999996	10113	1	0.0079518	-1.39837
CCDC109B	4	0.03998	0.09898	0.991261	1889	3	-0.14917	0.71066	0.72321	0.999996	13720	1	-0.14917	-1.39816
CALB1	4	0.040061	0.099146	0.991261	1890	3	-0.09874	0.66587	0.69121	0.999996	13101	1	-0.09874	-1.39728
SCAF8	4	0.040072	0.099165	0.991261	1891	3	-0.20131	0.41449	0.55542	0.999996	10559	1	-0.20131	-1.39716
MOSPD3	4	0.040084	0.099185	0.991261	1892	2	-0.16814	0.97109	0.9712	0.999996	18508	0	-0.16814	-1.39703
FAM3D	4	0.04009	0.099195	0.991261	1893	3	-0.14697	0.97797	0.97811	0.999996	18635	0	-0.14697	-1.39696
NXT1	4	0.040095	0.099203	0.991261	1894	2	-0.17006	0.86723	0.86735	0.999996	16458	0	-0.17006	-1.39691
AGPAT5	4	0.04011	0.099231	0.991261	1895	1	0.033717	0.26387	0.39869	0.999996	7595	1	0.033717	-1.39675
EFNB1	4	0.040162	0.099318	0.991261	1896	3	-0.18066	0.089951	0.19607	0.986532	3785	1	-0.18066	-1.39618
OR51B2	4	0.040207	0.099415	0.991261	1897	2	-0.0204	0.30798	0.44617	0.999996	8471	2	-0.0204	-1.3957
STEAP1B	4	0.04021	0.099425	0.991261	1898	1	0.02082	0.021747	0.061314	0.97304	1201	2	0.02082	-1.39567
ALKBH4	4	0.040216	0.099438	0.991261	1899	3	-0.094607	0.51309	0.60232	0.999996	11425	1	-0.094607	-1.3956
BCL2L15	4	0.040235	0.099469	0.991261	1900	2	-0.12836	0.33528	0.47534	0.999996	9054	2	-0.12836	-1.3954
LCE2D	4	0.040235	0.099469	0.991261	1901	3	-0.23415	0.25359	0.3876	0.999996	7399	1	-0.23415	-1.3954
PKIA	4	0.04026	0.099512	0.991261	1902	1	0.092147	0.066149	0.15117	0.986532	2907	2	0.092147	-1.39513
HSF2	4	0.040264	0.099521	0.991261	1903	3	-0.19567	0.93629	0.93623	0.999996	17849	0	-0.19567	-1.39508
HOXA10	4	0.04031	0.099615	0.991261	1904	1	-0.041184	0.91661	0.91656	0.999996	17422	0	-0.041184	-1.39459
IDI2	4	0.04036	0.09971	0.991261	1905	1	-0.02726	0.42469	0.56001	0.999996	10660	1	-0.02726	-1.39405
CCDC83	4	0.04041	0.099807	0.991261	1906	2	-0.10869	0.90352	0.90351	0.999996	17153	0	-0.10869	-1.39351
TTLL2	4	0.040421	0.099825	0.991261	1907	2	-0.12307	0.47994	0.58592	0.999996	11123	1	-0.12307	-1.39339
SLC4A3	4	0.040454	0.099898	0.991261	1908	2	-0.073818	0.81552	0.81562	0.999996	15489	0	-0.073818	-1.39304
OR2A7	4	0.040461	0.09991	0.991261	1909	2	-0.10986	0.88008	0.88011	0.999996	16714	0	-0.10986	-1.39296
SEPHS2	4	0.040466	0.099923	0.991261	1910	3	-0.2597	0.98139	0.98148	0.999996	18697	0	-0.2597	-1.39291
TTC23	4	0.040476	0.099945	0.991261	1911	3	-0.19881	0.93374	0.93368	0.999996	17793	0	-0.19881	-1.3928
HSD17B4	4	0.040511	0.10002	0.991261	1912	3	-0.17761	0.70008	0.71532	0.999996	13577	1	-0.17761	-1.39243
IGSF23	4	0.040526	0.10005	0.991261	1913	3	-0.15685	0.96003	0.96008	0.999996	18313	0	-0.15685	-1.39227
GDA	4	0.040567	0.10013	0.991261	1914	2	-0.088479	0.87944	0.87947	0.999996	16699	0	-0.088479	-1.39183
FAM160A2	4	0.040596	0.10017	0.991261	1915	3	-0.17207	0.055247	0.12983	0.985358	2518	1	-0.17207	-1.39152
TTC32	4	0.040647	0.10027	0.991261	1916	3	-0.18808	0.049443	0.11833	0.982021	2295	1	-0.18808	-1.39097
SYT14	4	0.040661	0.1003	0.991261	1917	1	0.0608	0.38544	0.52896	0.999996	10074	2	0.0608	-1.39082
C16orf86	4	0.040704	0.10039	0.991261	1918	3	-0.11062	0.13916	0.26446	0.993956	5071	1	-0.11062	-1.39036
ANKHD1-EIF4EBP3	4	0.040711	0.10041	0.991261	1919	2	-0.077648	0.51908	0.60539	0.999996	11483	1	-0.077648	-1.39029
GRK5	4	0.040759	0.1005	0.991261	1920	3	-0.1352	0.97237	0.9725	0.999996	18534	0	-0.1352	-1.38978
TPCN2	4	0.040793	0.10056	0.991261	1921	2	0.0023937	0.085861	0.1885	0.986532	3640	2	0.0023937	-1.38941
TIMM23B	4	0.040811	0.10059	0.991261	1922	1	-0.068318	0.90939	0.90937	0.999996	17276	0	-0.068318	-1.38922
UBA3	4	0.040821	0.10062	0.991261	1923	2	-0.20093	0.22822	0.36036	0.999996	6858	1	-0.20093	-1.38912
MTX2	4	0.040856	0.10069	0.991261	1924	3	-0.10856	0.65115	0.68145	0.999996	12911	1	-0.10856	-1.38874
BHLHE23	4	0.040861	0.10071	0.991261	1925	1	-0.012783	0.80239	0.80244	0.999996	15271	0	-0.012783	-1.38869
SLC16A10	4	0.040911	0.10079	0.991261	1926	1	-0.010776	0.82848	0.82862	0.999996	15725	0	-0.010776	-1.38816
NOTCH3	4	0.040951	0.10088	0.991261	1927	3	-0.19234	0.97201	0.97212	0.999996	18524	0	-0.19234	-1.38774
PGM2L1	4	0.040961	0.1009	0.991261	1928	3	-0.15944	0.76714	0.76914	0.999996	14600	1	-0.15944	-1.38763
UBE2QL1	4	0.040962	0.1009	0.991261	1929	2	-0.038041	0.24468	0.37802	0.999996	7189	2	-0.038041	-1.38762
PKD1	4	0.041009	0.101	0.991261	1930	3	-0.12634	0.97758	0.97773	0.999996	18628	0	-0.12634	-1.38712
ZNF385C	4	0.041011	0.10101	0.991261	1931	1	0.067249	0.16596	0.29348	0.998152	5619	2	0.067249	-1.3871
RARRES1	4	0.041041	0.10106	0.991261	1932	3	-0.12654	0.13115	0.25579	0.993956	4906	1	-0.12654	-1.38678
DYNLRB2	4	0.041086	0.10116	0.991261	1933	3	-0.23043	0.74715	0.75217	0.999996	14267	1	-0.23043	-1.38631
ORAI1	4	0.041087	0.10116	0.991261	1934	2	0.043878	0.017292	0.051702	0.966778	1019	2	0.043878	-1.3863
BOP1	4	0.041111	0.10121	0.991261	1935	3	-0.28177	0.7123	0.72438	0.999996	13735	1	-0.28177	-1.38604
IGSF8	4	0.041161	0.1013	0.991261	1936	2	-0.066395	0.73639	0.74331	0.999996	14095	1	-0.066395	-1.38551
NBEAL1	4	0.041211	0.1014	0.991261	1937	1	0.03866	0.039183	0.097895	0.980568	1895	1	0.03866	-1.38499
UNC5CL	4	0.041262	0.1015	0.991261	1938	2	-0.082116	0.77625	0.77738	0.999996	14773	1	-0.082116	-1.38445
CTDP1	4	0.041297	0.10158	0.991261	1939	3	-0.20547	0.5952	0.64674	0.999996	12265	1	-0.20547	-1.38408
TNFSF12-TNFSF13	4	0.041312	0.10161	0.991261	1940	1	-0.022846	0.69641	0.7126	0.999996	13524	1	-0.022846	-1.38392
MRPL19	4	0.041336	0.10166	0.991261	1941	2	-0.16609	0.0098548	0.033141	0.941204	658	1	-0.16609	-1.38367
PGLYRP3	4	0.041362	0.10171	0.991261	1942	1	0.1018	0.079071	0.17594	0.986532	3389	2	0.1018	-1.3834
PRPF18	4	0.041419	0.10184	0.991261	1943	3	-0.27414	0.14602	0.27195	0.993956	5220	1	-0.27414	-1.3828
GINS4	4	0.041427	0.10186	0.991261	1944	2	-0.055846	0.15477	0.28134	0.993956	5399	2	-0.055846	-1.38272
PTPN12	4	0.04145	0.10189	0.991261	1945	2	-0.10104	0.40222	0.54708	0.999996	10394	1	-0.10104	-1.38248
SLC30A8	4	0.041471	0.10194	0.991261	1946	3	-0.1111	0.77335	0.77474	0.999996	14719	1	-0.1111	-1.38226
CDCA4	4	0.041487	0.10198	0.991261	1947	1	0.036209	0.78813	0.78844	0.999996	14988	1	0.036209	-1.38209
TMEM150C	4	0.041487	0.10198	0.991261	1948	1	-0.024122	0.73219	0.73993	0.999996	14033	1	-0.024122	-1.38209
DBX1	4	0.041518	0.10203	0.991261	1949	2	-0.066356	0.74032	0.7465	0.999996	14157	1	-0.066356	-1.38176
KIF23	4	0.041552	0.1021	0.991261	1950	2	-0.074732	0.011802	0.039159	0.941204	792	1	-0.074732	-1.38141
SLC34A2	4	0.041554	0.1021	0.991261	1951	3	-0.15126	0.83244	0.83259	0.999996	15813	0	-0.15126	-1.38139
NME9	4	0.041562	0.10213	0.991261	1952	2	-0.095465	0.051182	0.12176	0.982021	2368	2	-0.095465	-1.3813
DPP3	4	0.041575	0.10215	0.991261	1953	2	-0.14302	0.72723	0.73601	0.999996	13961	1	-0.14302	-1.38117
ADGRG1	4	0.041593	0.10219	0.991261	1954	3	-0.15173	0.44423	0.56889	0.999996	10823	1	-0.15173	-1.38098
SHISA3	4	0.041606	0.10221	0.991261	1955	3	-0.1366	0.83528	0.8354	0.999996	15870	0	-0.1366	-1.38084
MEOX1	4	0.041612	0.10223	0.991261	1956	1	0.1121	0.21801	0.34946	0.999996	6652	2	0.1121	-1.38078
KRTAP2-2	4	0.041628	0.10226	0.991261	1957	3	-0.28658	0.81992	0.82002	0.999996	15570	0	-0.28658	-1.38061
VSX1	4	0.041632	0.10226	0.991261	1958	2	-0.092883	0.92318	0.92323	0.999996	17566	0	-0.092883	-1.38057
SRPK3	4	0.041643	0.10229	0.991261	1959	3	-0.12497	0.33468	0.47469	0.999996	9041	1	-0.12497	-1.38046
CPN2	4	0.041662	0.10232	0.991261	1960	2	-0.0034518	0.22532	0.35727	0.999996	6791	2	-0.0034518	-1.38026
CALR	4	0.04167	0.10233	0.991261	1961	3	-0.13255	0.98632	0.9864	0.999996	18820	0	-0.13255	-1.38018
ABCA5	4	0.041689	0.10237	0.991261	1962	2	-0.17765	0.41732	0.5567	0.999996	10584	1	-0.17765	-1.37998
LIN37	4	0.041712	0.10241	0.991261	1963	2	0.011913	0.049427	0.11831	0.982021	2294	2	0.011913	-1.37974
TADA2B	4	0.041734	0.10246	0.991261	1964	3	-0.26215	0.62985	0.66771	0.999996	12654	1	-0.26215	-1.37951
MEDAG	4	0.041735	0.10246	0.991261	1965	2	-0.10208	0.61652	0.6595	0.999996	12502	1	-0.10208	-1.3795
ZNF85	4	0.041757	0.10252	0.991261	1966	2	-0.14401	0.86355	0.86365	0.999996	16389	0	-0.14401	-1.37927
SLC23A3	4	0.041762	0.10252	0.991261	1967	3	-0.12291	0.68253	0.70268	0.999996	13317	1	-0.12291	-1.37922
PCDHA4	4	0.041799	0.1026	0.991261	1968	3	-0.14766	0.75418	0.75798	0.999996	14386	1	-0.14766	-1.37883
EVI5L	4	0.041812	0.10262	0.991261	1969	1	0.040913	0.30897	0.44727	0.999996	8488	1	0.040913	-1.3787
DENND6A	4	0.041812	0.10262	0.991261	1970	3	-0.20608	0.89493	0.89494	0.999996	16987	0	-0.20608	-1.3787
METTL18	4	0.041826	0.10264	0.991261	1971	2	-0.13604	0.43337	0.5639	0.999996	10722	1	-0.13604	-1.37855
ZNF10	4	0.041862	0.10272	0.991261	1972	3	-0.19239	0.10059	0.2156	0.986851	4174	1	-0.19239	-1.37818
CCDC81	4	0.041889	0.10277	0.991261	1973	3	-0.22576	0.98765	0.98771	0.999996	18849	0	-0.22576	-1.3779
SHROOM1	4	0.041912	0.10282	0.991261	1974	1	0.06731	0.096572	0.20825	0.986532	4026	2	0.06731	-1.37766
PRRG4	4	0.041917	0.10283	0.991261	1975	2	-0.090686	0.22631	0.35834	0.999996	6815	1	-0.090686	-1.37761
CADM4	4	0.041935	0.10287	0.991261	1976	3	-0.12921	0.3924	0.53637	0.999996	10205	1	-0.12921	-1.37742
B3GNT3	4	0.041986	0.10297	0.991261	1977	2	-0.23373	0.49961	0.59554	0.999996	11295	1	-0.23373	-1.3769
CYP4F3	4	0.041987	0.10298	0.991261	1978	3	-0.15355	0.93956	0.93955	0.999996	17910	0	-0.15355	-1.37689
EPHA5	4	0.04202	0.10305	0.991261	1979	2	-0.09462	0.65242	0.68226	0.999996	12926	1	-0.09462	-1.37654
UBE2I	4	0.042062	0.10313	0.991261	1980	1	0.060057	0.3703	0.51261	0.999996	9759	1	0.060057	-1.37611
FAM126B	4	0.042077	0.10316	0.991261	1981	3	-0.14364	0.91818	0.91814	0.999996	17466	0	-0.14364	-1.37596
GPER1	4	0.042097	0.1032	0.991261	1982	3	-0.11102	0.73663	0.7435	0.999996	14102	1	-0.11102	-1.37575
ATP8A1	4	0.04211	0.10323	0.991261	1983	3	-0.14601	0.20717	0.3378	0.999996	6427	1	-0.14601	-1.37561
PRSS57	4	0.042112	0.10324	0.991261	1984	2	-0.14167	0.87838	0.87844	0.999996	16675	0	-0.14167	-1.37559
Non-Targeting-Control	1000	0.042146	0.13633	0.992356	1985	296	0.0055238	0.12598	0.30588	0.998747	4810	347	0.0055238	-1.37524
RAB3GAP1	4	0.042162	0.10334	0.991261	1986	3	-0.25489	0.96739	0.96748	0.999996	18437	0	-0.25489	-1.37508
SLCO3A1	4	0.0422	0.10341	0.991261	1987	3	-0.13672	0.065402	0.14972	0.986532	2883	1	-0.13672	-1.37469
TWF2	4	0.042212	0.10344	0.991261	1988	2	-0.059435	0.65014	0.68079	0.999996	12902	1	-0.059435	-1.37456
MAGEB18	4	0.042238	0.10348	0.991261	1989	2	-0.050009	0.39127	0.53513	0.999996	10189	2	-0.050009	-1.3743
ZBTB40	4	0.042262	0.10352	0.991261	1990	3	-0.16865	0.52764	0.60978	0.999996	11577	1	-0.16865	-1.37405
TBC1D28	4	0.042311	0.10363	0.991261	1991	3	-0.13329	0.97667	0.97682	0.999996	18604	0	-0.13329	-1.37355
TMEM98	4	0.042312	0.10363	0.991261	1992	2	-0.10713	0.73934	0.74568	0.999996	14144	1	-0.10713	-1.37354
KRT78	4	0.042362	0.10371	0.991261	1993	1	0.11396	0.03685	0.093019	0.980568	1800	2	0.11396	-1.37302
MUSTN1	4	0.04237	0.10373	0.991261	1994	3	-0.26538	0.93701	0.93696	0.999996	17866	0	-0.26538	-1.37294
MYNN	4	0.04237	0.10373	0.991261	1995	3	-0.15971	0.94084	0.94082	0.999996	17930	0	-0.15971	-1.37294
FBXW4	4	0.042396	0.10378	0.991261	1996	3	-0.1463	0.9796	0.97973	0.999996	18669	0	-0.1463	-1.37268
MUC5AC	4	0.042398	0.10379	0.991261	1997	2	-0.096039	0.87603	0.87609	0.999996	16633	0	-0.096039	-1.37265
IGSF9B	4	0.042402	0.10379	0.991261	1998	3	-0.13625	0.90742	0.90739	0.999996	17233	0	-0.13625	-1.37261
REG1B	4	0.042409	0.1038	0.991261	1999	3	-0.14569	0.46668	0.5795	0.999996	11010	1	-0.14569	-1.37254
[truncated: 17,114 more rows]

## Sheet: sgRNA scores and read counts
sgRNA sequence	Gene targeted	Mean read counts in DMSO samples	Mean read counts in olaparib samples	Log2 fold change of sgRNA	Raw variance in DMSO samples	Adjusted variance in DMSO samples	Score of the sgRNA	P-value (lower tail)	P-value (higher tail)	P-value (two-sided)	False discovery rate	Abundance is higher in olaparib samples	Read count DMSO sample replicate 1	Read count olaparib sample replicate 1	Read count DMSO sample replicate 2	Read count olaparib sample replicate 2
43525_41331_AGATGACCACAAGTGAAAGG	MARCHF1	182.82	169.01	-0.11265	95.357	2147.2	0.29797	0.38284	0.61716	0.76568	0.87292	FALSE	200	168	102	144
43525_41332_ATACAAAGACCAAACCACAC	MARCHF1	106.73	87.847	-0.27804	178.73	1050	0.5828	0.27966	0.72034	0.55932	0.73234	FALSE	119	74	52	57
43525_41333_GCGAACACCCGAGATCTCAG	MARCHF1	39.1	11.458	-1.6865	415.53	279.05	1.6547	0.03975	0.96025	0.0795	0.21366	FALSE	7	47	3	10
43525_41334_TCGACTTGCAGATCGCCCTG	MARCHF1	478.71	237.76	-1.0066	29898	7774.8	2.7326	0.0031417	0.99686	0.0062834	0.034846	FALSE	375	420	265	347
43525_47963_AACAAGTCTGCTATTTGATG	MARCHF1	804.19	959.63	0.25467	12106	15602	1.2445	0.89335	0.10665	0.21331	0.40795	TRUE	953	912	490	587
43525_47964_CCGCCAGCGACGCCTCAGAA	MARCHF1	888.73	601.56	-0.56225	41621	17846	2.1496	0.015794	0.98421	0.031588	0.11405	FALSE	795	649	635	743
43525_47965_GAAGCTGGTTATCCACTGGG	MARCHF1	481.88	663.63	0.46089	16622	7843.9	2.0522	0.97992	0.020077	0.040155	0.1346	TRUE	487	472	331	422
43525_47966_TCTCAGTGCAGCCTACACAA	MARCHF1	3.1702	8.5937	1.202	15.552	10.983	1.6365	0.93876	0.061241	0.12248	0.28457	TRUE	7	4	3	5
43526_38267_GCAGTAGCTGGTGTTAGATG	MARCHF2	447	176.65	-1.3345	38445	7092.4	3.2102	0.00066307	0.99934	0.0013261	0.010182	FALSE	410	349	408	442
43526_38268_GCTGCCGGAGCAGTCACACA	MARCHF2	315.97	346.61	0.13315	469.85	4457.3	0.45903	0.67689	0.32311	0.64621	0.79436	TRUE	212	256	199	244
43526_38269_GTCACCTGTGCCACATACTG	MARCHF2	429.04	402.95	-0.09029	340.4	6713.1	0.31842	0.37508	0.62492	0.75017	0.86327	FALSE	136	161	277	353
43526_38270_GTCCAAGGCACGGATGACGG	MARCHF2	270.53	294.1	0.12009	277.88	3621.9	0.39163	0.65233	0.34767	0.69533	0.82772	TRUE	129	109	215	220
43526_41263_AGTCTCTGCCTTTAATGTCA	MARCHF2	358.24	210.07	-0.76722	11170	5272.6	2.0405	0.020648	0.97935	0.041297	0.1372	FALSE	264	248	206	268
43526_41264_ATGGAGATGAGCACGAGGCG	MARCHF2	266.3	303.65	0.18867	698.07	3546.5	0.62709	0.7347	0.2653	0.5306	0.7112	TRUE	179	210	82	107
43526_41265_CAATTTGAGACAAACATGAA	MARCHF2	254.68	223.44	-0.18801	488.46	3341.2	0.54044	0.29444	0.70556	0.58889	0.75262	FALSE	225	270	142	201
43526_41266_GAGCGGGCAGTAGTCTGGGT	MARCHF2	49.667	113.63	1.1778	2130.4	382.13	3.272	0.99946	0.00053698	0.001074	0.0085758	TRUE	35	49	14	23
43527_57421_AAGGTCCCTGTACATTCACA	MARCHF3	407.9	322.74	-0.33692	3638.7	6273.8	1.0752	0.14115	0.85885	0.28229	0.48624	FALSE	246	333	235	236
43527_57422_CAAACCCAGGCCGTTAGTGG	MARCHF3	196.56	286.46	0.5411	4076.8	2364.8	1.8487	0.96775	0.032249	0.064499	0.18548	TRUE	159	152	99	121
43527_57423_GAAACTTGCATGACATACTG	MARCHF3	126.81	70.66	-0.83477	1609.6	1319.9	1.5456	0.060879	0.93912	0.12176	0.28346	FALSE	161	89	96	137
43527_57424_TCGTGGCAGATCCTGCACAT	MARCHF3	459.69	312.24	-0.55652	10971	7363.4	1.7183	0.042873	0.95713	0.085745	0.22487	FALSE	433	336	262	375
43528_45891_ATCAAGTGGATCAGCGAGCG	MARCHF4	430.1	444.01	0.045826	96.795	6735.3	0.16953	0.56731	0.43269	0.86538	0.93221	TRUE	406	429	236	308
43528_45892_CTGGTGGCGCAACATCTGGG	MARCHF4	101.45	193.84	0.92737	4377.6	981.6	2.9488	0.9984	0.0015958	0.0031917	0.02058	TRUE	71	104	45	65
43528_45893_CTTCTGTAAGGAGAAGACCG	MARCHF4	478.71	348.52	-0.45676	8526.9	7774.8	1.4764	0.069915	0.93009	0.13983	0.31112	FALSE	446	320	343	384
43528_45894_TTGTTGGCCGCCAAACCGGG	MARCHF4	172.25	70.66	-1.2736	5407.7	1983.5	2.2811	0.011218	0.98878	0.022435	0.089199	FALSE	156	91	115	155
43529_40423_AGGACTATGTGCTTAGACTG	MARCHF5	88.767	288.37	1.6886	21551	822.45	6.96	1	1.7033e-12	3.4067e-12	1.0875e-10	TRUE	141	171	70	77
43529_40424_AGGTATTCAGCATTGCACTG	MARCHF5	102.5	340.88	1.7238	30827	995.18	7.5565	1	2.0719e-14	4.1439e-14	1.5209e-12	TRUE	256	162	83	75
43529_40425_CCAGGCCTGTCTACAACGCT	MARCHF5	58.121	158.51	1.4319	5342.1	470.03	4.6303	1	1.8325e-06	3.665e-06	5.6818e-05	TRUE	333	323	47	82
43529_40426_CTGAATGGGTGAGACCATGC	MARCHF5	92.994	280.73	1.5837	18900	874.71	6.3477	1	1.094e-10	2.188e-10	5.9454e-09	TRUE	235	177	37	52
43530_27685_CCCCACCGTTCAATGCTGCG	MARCHF6	359.29	354.25	-0.02033	12.708	5293.4	0.069292	0.47238	0.52762	0.94476	0.97367	FALSE	370	311	328	311
43530_27686_TCTCAGTAGTAGAATGAAGG	MARCHF6	5.2837	32.465	2.413	435.16	20.959	5.9372	1	1.655e-09	3.3101e-09	7.9336e-08	TRUE	18	6	2	5
43530_27687_TGTCCCTGTTCGAGTAATGC	MARCHF6	102.5	129.86	0.33834	375.49	995.18	0.86717	0.80697	0.19303	0.38607	0.58736	TRUE	95	106	50	80
43530_27688_TTGGTTTCATTATACACTTG	MARCHF6	206.07	397.22	0.94348	18753	2518.6	3.809	0.99993	6.9774e-05	0.00013955	0.0015108	TRUE	237	250	117	199
43531_48151_AGATCTAGATGATGTATCAG	MARCHF7	662.58	528.99	-0.3243	8951.2	12026	1.2182	0.11158	0.88842	0.22316	0.41925	FALSE	612	602	386	476
43531_48152_ATGAAGGTAGGCGGACAACG	MARCHF7	866.53	918.57	0.084048	1354.4	17250	0.39624	0.65404	0.34596	0.69193	0.8254	TRUE	588	526	535	680
43531_48153_ATGGATTATAGTCACCGAAG	MARCHF7	240.94	273.09	0.18001	517.36	3102.8	0.5772	0.71809	0.28191	0.56381	0.73654	TRUE	282	288	143	194
43531_48154_CAAACTGTACTACCTCAGCT	MARCHF7	559.02	697.05	0.31785	9554.8	9572.8	1.4107	0.92084	0.07916	0.15832	0.33697	TRUE	525	537	376	507
43532_65637_CATAGGATCTGCCACTGTGA	MARCHF8	490.33	758.16	0.62771	36288	8028.9	2.989	0.9986	0.0013995	0.0027989	0.018529	TRUE	361	394	292	389
43532_65638_GCTCATTGACCGTACTGCTG	MARCHF8	258.9	352.34	0.4431	4391.3	3415.5	1.5988	0.94507	0.054928	0.10986	0.26487	TRUE	149	240	134	142
43532_65639_GGCAGGCCTGGTGCACGAAG	MARCHF8	338.16	301.74	-0.1639	663.88	4880.9	0.52135	0.30106	0.69894	0.60212	0.76267	FALSE	271	256	209	253
43532_65640_TCTGTAGACTCTAGCAGAGA	MARCHF8	618.2	399.13	-0.62993	24280	10957	2.0928	0.018184	0.98182	0.036367	0.12562	FALSE	647	627	510	609
43533_56401_AGCGCACTGAGCCGTCGCAG	MARCHF9	248.34	297.92	0.26165	1231.6	3230.6	0.8723	0.80848	0.19152	0.38305	0.58475	TRUE	243	234	190	219
43533_56402_GCGACGAGGAGGAGTACTAC	MARCHF9	151.11	276.91	0.86945	8090.6	1666.3	3.0816	0.99897	0.0010295	0.0020589	0.014469	TRUE	203	160	76	104
43533_56403_TGGAAGCAGATCCGGCACTG	MARCHF9	349.78	235.85	-0.56661	6553	5106.8	1.5943	0.055431	0.94457	0.11086	0.26643	FALSE	426	302	250	302
43533_56404_TTCAGCCAAGTGGCAACGAC	MARCHF9	905.63	723.78	-0.32297	16586	18304	1.3441	0.089457	0.91054	0.17891	0.36426	FALSE	591	580	620	759
43534_63501_AAGTATTGAGTGAGTTCTCG	MARCHF10	417.42	399.13	-0.064463	167.18	6470.5	0.2273	0.41009	0.58991	0.82019	0.90601	FALSE	316	365	240	263
43534_63502_AATGCATGAATGATGCAGGA	MARCHF10	368.81	347.57	-0.085321	225.54	5481.9	0.28682	0.38712	0.61288	0.77425	0.87806	FALSE	289	335	199	226
43534_63503_AGATGACCTGCTAGAAAACC	MARCHF10	177.53	239.67	0.43086	1941.3	2064.9	1.3674	0.91425	0.085755	0.17151	0.35469	TRUE	121	161	91	125
43534_63504_CACCTGGAGAGGGTTCGCTG	MARCHF10	349.78	296.01	-0.24009	1448.5	5106.8	0.75253	0.22587	0.77413	0.45173	0.64661	FALSE	313	250	258	298
43535_73053_ACTGACCCATCACATCGGCA	MARCHF11	440.66	515.62	0.22617	2813.8	6957.9	0.89865	0.81558	0.18442	0.36884	0.57157	TRUE	458	376	311	363
43535_73054_AGGTCCGAGGCGCCTCCCGG	MARCHF11	238.83	236.81	-0.012202	2.04	3066.5	0.036476	0.48545	0.51455	0.97089	0.98603	FALSE	185	294	192	190
43535_73055_GCCAAGCGAGCCGCTAGGGG	MARCHF11	62.348	136.54	1.1185	2855.4	515.63	3.2675	0.99946	0.00054412	0.0010882	0.008663	TRUE	93	153	44	39
43535_73056_TCTATAACAGCAAAGTTCAC	MARCHF11	119.41	174.74	0.54545	1544.3	1218.6	1.5849	0.94349	0.056513	0.11303	0.26968	TRUE	80	116	43	97
43709_4773_ACCCTGGCCATTGAGCGCCG	SEPTIN1	201.84	386.72	0.93467	17534	2449.9	3.7352	0.99991	9.3799e-05	0.0001876	0.0019582	TRUE	119	153	88	68
43709_4774_CAGTACCTTAGGGATGAGAG	SEPTIN1	158.51	183.33	0.20865	308.44	1775.7	0.58902	0.72205	0.27795	0.5559	0.73007	TRUE	126	137	114	139
43709_4775_CGGAGGAAGGCCACATCTAG	SEPTIN1	128.92	185.24	0.51952	1598.9	1349.2	1.5333	0.93738	0.062616	0.12523	0.28892	TRUE	162	198	86	119
43709_4776_GTTTGACTTCACGCTAATGG	SEPTIN1	108.85	231.08	1.0791	7728.4	1077.6	3.7235	0.9999	9.8299e-05	0.0001966	0.0020386	TRUE	132	145	78	82
43710_12409_ATATTGATGAGCAATTTGAG	SEPTIN2	494.56	316.06	-0.64431	16129	8121.9	1.9807	0.023815	0.97618	0.04763	0.15131	FALSE	418	419	350	430
43710_12410_GGTCAAGCTACGCCTGACAG	SEPTIN2	435.38	515.62	0.24353	3225.3	6846.4	0.9698	0.83393	0.16607	0.33215	0.53673	TRUE	499	446	296	369
43710_12411_TATGAAGGCAATACACAACA	SEPTIN2	119.41	135.59	0.18187	130.99	1218.6	0.46342	0.67837	0.32163	0.64326	0.79202	TRUE	172	225	77	88
43710_12412_TTTCTGGGTACAGATCAGTT	SEPTIN2	199.73	260.68	0.38256	1865.7	2415.8	1.2401	0.89253	0.10747	0.21495	0.40984	TRUE	187	188	93	129
43711_43783_CAAATCCCAAGTGAGCCGCA	SEPTIN3	212.41	208.16	-0.029	9.0186	2622.5	0.082932	0.46694	0.53306	0.93389	0.96877	FALSE	82	70	128	142
43711_43784_GACTTCAACATCATGGTCGT	SEPTIN3	603.4	462.15	-0.38403	10020	10607	1.3715	0.085105	0.91489	0.17021	0.35292	FALSE	490	493	371	370
43711_43785_GGTACATACGAGTGTCCTGT	SEPTIN3	250.45	322.74	0.36458	2623.6	3267.4	1.2647	0.89702	0.10298	0.20597	0.39909	TRUE	300	366	199	215
43711_43786_TCCAACCTGCTGGGCTACAT	SEPTIN3	346.61	439.24	0.34079	4304.4	5044.9	1.304	0.90389	0.096112	0.19222	0.38181	TRUE	221	324	249	263
43712_14321_AAAGAACATCCAAGACAACA	SEPTIN4	57.064	144.18	1.3222	3991.2	458.8	4.0673	0.99998	2.3875e-05	4.775e-05	0.00058723	TRUE	80	149	36	34
43712_14322_ATGCAGTCAACAACACAGAG	SEPTIN4	270.53	336.11	0.31212	2156.9	3621.9	1.0897	0.86209	0.13791	0.27583	0.47904	TRUE	234	219	119	168
43712_14323_GGAGATCACTAAGCATGCAG	SEPTIN4	116.24	133.68	0.20005	152.23	1175.9	0.50853	0.69435	0.30565	0.61129	0.76979	TRUE	194	124	61	63
43712_14324_TGGAGTTCAGACCCCCCTCG	SEPTIN4	647.79	653.12	0.01182	14.244	11667	0.049414	0.51971	0.48029	0.96059	0.98121	TRUE	820	644	515	511
43713_14317_CACACACCCATGCCCGAAGG	SEPTIN5	87.71	246.35	1.4794	13386	809.51	5.5759	1	1.2329e-08	2.4658e-08	5.3428e-07	TRUE	55	71	37	43
43713_14318_GAAGCCCATCACCGACTATG	SEPTIN5	405.79	321.79	-0.3337	3540.1	6230.3	1.0642	0.14361	0.85639	0.28722	0.4915	FALSE	317	284	240	311
43713_14319_GACATTGACAAGCAGTACGT	SEPTIN5	306.46	235.85	-0.37641	2503.3	4278.8	1.0794	0.1402	0.8598	0.2804	0.48416	FALSE	262	414	213	298
43713_14320_GGTAGAGATTCTAAAACACA	SEPTIN5	51.781	132.73	1.3412	3450.5	403.68	4.0288	0.99997	2.8177e-05	5.6353e-05	0.00068164	TRUE	21	44	26	25
43714_31899_ACCTCCAAGAGAGCAACGTG	SEPTIN6	700.62	841.23	0.26352	9905.8	12963	1.235	0.89158	0.10842	0.21684	0.41205	TRUE	522	504	387	578
43714_31900_ACTTCAGGGAATGACCCGTG	SEPTIN6	172.25	211.02	0.29137	753.64	1983.5	0.87062	0.80801	0.19199	0.38398	0.58563	TRUE	165	188	116	155
43714_31901_CTGCTATGCAGTTGAAAACG	SEPTIN6	600.23	952	0.66454	62683	10532	3.4277	0.9997	0.0003044	0.0006088	0.0053557	TRUE	397	436	338	419
43714_31902_TGTTCAACACCAAATTCGAA	SEPTIN6	193.38	169.01	-0.1933	297.4	2314.1	0.5067	0.30616	0.69384	0.61233	0.77059	FALSE	132	163	103	115
43715_2793_CTGGAGAATACAAATCTGTG	SEPTIN7	46.497	230.12	2.2827	19286	350.37	9.8099	1	5.1379e-23	1.0276e-22	6.3007e-21	TRUE	151	119	19	27
43715_2794_TACAGAAAATCGGTGAAGAG	SEPTIN7	169.08	283.59	0.74269	6665	1935	2.6032	0.99538	0.0046175	0.0092351	0.04667	TRUE	105	187	100	119
43715_2795_TTACCTTCAGCAACACCCCA	SEPTIN7	61.291	330.38	2.4114	41929	504.13	11.985	1	2.1437e-33	4.2874e-33	3.7859e-31	TRUE	34	34	17	20
43715_2796_TTACTACCTACCACAGCAAG	SEPTIN7	125.75	163.28	0.37415	707.16	1305.3	1.0387	0.8505	0.1495	0.299	0.50352	TRUE	127	75	94	112
43716_31971_CAACACGACCTTCGAGACTG	SEPTIN8	1123.3	774.39	-0.53606	61400	24460	2.231	0.012839	0.98716	0.025678	0.098281	FALSE	1010	871	682	874
43716_31972_CCAGATCTACCAGTTCCCCA	SEPTIN8	189.16	361.89	0.93234	15304	2247	3.644	0.99987	0.00013421	0.00026843	0.0026664	TRUE	216	240	125	163
43716_31973_CGAGCACGGCAGTACCCCTG	SEPTIN8	1063.1	660.76	-0.68523	82066	22711	2.6697	0.0037963	0.9962	0.0075925	0.040126	FALSE	730	662	830	943
43716_31974_GGTAGTCGAAGAGCGAGCGG	SEPTIN8	652.01	599.65	-0.12058	1371.5	11769	0.48265	0.31467	0.68533	0.62934	0.78263	FALSE	681	608	447	521
43717_29207_CGTGATGGACTTGATCTCGA	SEPTIN9	231.43	113.63	-1.0198	7153	2940.4	2.1724	0.014903	0.9851	0.029806	0.10946	FALSE	208	197	183	210
43717_29208_GCCTGCATCACGGAACGAGA	SEPTIN9	232.48	263.54	0.18017	482.73	2958.3	0.57099	0.716	0.284	0.56801	0.73978	TRUE	200	190	157	180
43717_29209_TCATTGATGAACTTCATGAT	SEPTIN9	313.85	230.12	-0.44603	3526.6	4417.5	1.2598	0.10387	0.89613	0.20773	0.40133	FALSE	303	359	226	280
43717_29210_TCCCCTACTCCGAGCCACTG	SEPTIN9	161.68	190.97	0.23884	429.68	1823.1	0.68596	0.75361	0.24639	0.49277	0.68102	TRUE	176	134	129	149
43718_62425_AAATCCCACTGTATTCACAA	SEPTIN10	149	188.11	0.33423	767.22	1635.4	0.96701	0.83321	0.16679	0.33358	0.53812	TRUE	112	111	55	63
43718_62426_ATGGATGCGAGAATCATGGT	SEPTIN10	721.76	569.1	-0.34231	11694	13491	1.3143	0.094365	0.90563	0.18873	0.3774	FALSE	718	593	463	601
43718_62427_CCAGATATACCAGTTCCCAA	SEPTIN10	40.156	102.17	1.3258	2023.6	288.99	3.6479	0.99987	0.0001334	0.00026679	0.0026544	TRUE	31	32	15	18
43718_62428_GCAAACTCTCAAAACCAACA	SEPTIN10	53.894	37.24	-0.52159	139.86	425.52	0.80738	0.20616	0.79384	0.41232	0.61071	FALSE	27	42	19	27
43719_43251_CTTTAGTGAATGTCCAGTAG	SEPTIN11	118.36	246.35	1.0513	8460.5	1204.3	3.6883	0.99989	0.0001129	0.0002258	0.0022996	TRUE	225	204	104	104
43719_43252_GAGTGAACTGGTCAGCAATG	SEPTIN11	722.82	621.61	-0.21729	5128.2	13518	0.87044	0.19203	0.80797	0.38406	0.58569	FALSE	693	597	538	601
43719_43253_GATTGGCAACAAGATGGCAA	SEPTIN11	443.83	538.54	0.27846	4495.1	7025.1	1.1299	0.87075	0.12925	0.2585	0.46014	TRUE	399	372	255	279
43719_43254_TGAATAACTTACCAACACAA	SEPTIN11	87.71	89.757	0.032908	2.0946	809.51	0.071936	0.52819	0.47181	0.94362	0.97322	TRUE	93	135	51	76
43720_58729_CGCTGTTCAAGTCCAAAGTG	SEPTIN12	354.01	301.74	-0.2298	1368.5	5189.5	0.72566	0.23402	0.76598	0.46805	0.66075	FALSE	239	216	259	307
43720_58730_GATCAACAATGACAACTGGT	SEPTIN12	366.69	304.6	-0.26685	1931.8	5439.8	0.84186	0.19993	0.80007	0.39987	0.59994	FALSE	343	357	285	387
43720_58731_GCTGTGCCGGACTGTGAATG	SEPTIN12	156.4	113.63	-0.45746	920.46	1744.3	1.0241	0.15282	0.84718	0.30564	0.50979	FALSE	327	260	136	154
43720_58732_GGACCAAGCATCTCGCAGGG	SEPTIN12	202.9	236.81	0.22195	575.79	2467.1	0.6827	0.7526	0.2474	0.49481	0.68243	TRUE	154	155	117	140
43722_69733_ACTGAAACTTACACTAACTG	SEPTIN14	274.75	251.13	-0.12923	279.24	3697.7	0.38854	0.34881	0.65119	0.69761	0.82907	FALSE	260	187	174	234
43722_69734_AGAATCATGGTACTCAAACA	SEPTIN14	270.53	545.22	1.0084	38864	3621.9	4.5644	1	2.5041e-06	5.0083e-06	7.5855e-05	TRUE	143	152	89	113
43722_69735_AGAGGCCGTCACTACCCTTG	SEPTIN14	906.69	936.72	0.046954	450.85	18333	0.22177	0.58775	0.41225	0.82449	0.90854	TRUE	660	669	641	709
43722_69736_GTGAGCAGATCTATCCGACA	SEPTIN14	293.78	422.05	0.5212	8293.9	4043.7	2.0172	0.97816	0.021839	0.043679	0.14242	TRUE	253	216	134	153
43723_24729_AACAACCGTAGCCCAAACGC	SEPTIN15	107.79	84.983	-0.33941	260.97	1063.8	0.69923	0.24184	0.75816	0.48369	0.67356	FALSE	90	123	64	90
43723_24730_GGAAGGTTCCCTCAAGTCCA	SEPTIN15	180.7	324.65	0.84174	10580	2114.2	3.1307	0.99913	0.00087208	0.0017442	0.012689	TRUE	178	256	123	157
43723_24731_GTTGGCGACTGTGCTTCAAG	SEPTIN15	332.88	377.17	0.17972	981.93	4779.2	0.64072	0.73915	0.26085	0.52171	0.70376	TRUE	253	246	159	213
43723_24732_TTGCAGAGGATGCTGTCAGG	SEPTIN15	89.824	196.7	1.1222	5924.9	835.44	3.6977	0.99989	0.00010889	0.00021779	0.0022288	TRUE	98	83	30	42
43800_37239_ACAGAGAGAGGTCTGTAAAG	DELEC1	581.21	526.13	-0.14339	1518.1	10086	0.54848	0.29168	0.70832	0.58336	0.74929	FALSE	507	628	451	551
43800_37240_TACAGACCTCTCTCTGTGCA	DELEC1	1325.2	989.23	-0.42141	56724	30558	1.9217	0.027323	0.97268	0.054645	0.16606	FALSE	993	1028	995	1154
43800_37241_TCATGTGTAACACGGCAAGA	DELEC1	701.68	592.97	-0.24248	5919.7	12989	0.95387	0.17007	0.82993	0.34015	0.54439	FALSE	665	689	498	635
43800_37242_TCTTGCCGTGTTACACATGA	DELEC1	728.1	423	-0.78204	47389	13651	2.6113	0.0045095	0.99549	0.0090191	0.045853	FALSE	422	483	486	583
A1BG_1_CATCTTCTTTCACCTGAACG	A1BG	613.97	468.84	-0.38836	10580	10857	1.3929	0.081824	0.91818	0.16365	0.34448	FALSE	722	521	384	450
A1BG_2_CTCCGGGGAGAACTCCGGCG	A1BG	700.62	690.36	-0.021254	52.639	12963	0.090119	0.4641	0.5359	0.92819	0.96599	FALSE	856	893	577	682
A1BG_3_TCTCCATGGTGCATCAGCAC	A1BG	6.3405	11.458	0.76316	13.372	26.439	0.99532	0.82071	0.17929	0.35858	0.56193	TRUE	0	0	7	8
A1BG_4_TGGAAGTCCACTCCACTCAG	A1BG	1036.7	797.31	-0.37833	28770	21955	1.6154	0.053108	0.94689	0.10622	0.25915	FALSE	778	800	784	974
A1CF_36947_ACAGGAAGAATTCAGTTATG	A1CF	682.66	544.27	-0.32631	9606.4	12518	1.2369	0.10807	0.89193	0.21613	0.41124	FALSE	842	703	424	504
A1CF_36948_AGTTATGTTAGGTATACCCG	A1CF	205.01	390.54	0.92644	17649	2501.4	3.7095	0.9999	0.00010382	0.00020764	0.0021377	TRUE	305	276	143	196
A1CF_36949_CTTCATTTCCCAGCCACCAA	A1CF	294.83	265.45	-0.15091	431.94	4063.2	0.46094	0.32242	0.67758	0.64484	0.79325	FALSE	219	215	146	198
A1CF_36950_GAATTCAACAATATCAAACC	A1CF	72.916	79.253	0.11868	20.092	634.03	0.2517	0.5986	0.4014	0.80279	0.89653	TRUE	149	113	82	91
A2M_5_ACTGCATCTGTGCAAACGGG	A2M	229.31	196.7	-0.22028	532.59	2904.6	0.60513	0.27254	0.72746	0.54508	0.72149	FALSE	179	182	141	212
A2M_6_ATGTCTCATGAACTACCCTG	A2M	459.69	399.13	-0.20331	1835.7	7363.4	0.70567	0.2402	0.7598	0.48039	0.67118	FALSE	284	296	180	232
A2M_7_TGAAATGAAACTTCACACTG	A2M	247.28	189.06	-0.38549	1702.2	3212.3	1.0272	0.15216	0.84784	0.30433	0.5086	FALSE	212	166	124	203
A2M_8_TTACTCATATAGGATCCCAA	A2M	221.92	149.91	-0.56279	2617	2780.3	1.3656	0.086025	0.91397	0.17205	0.35524	FALSE	148	231	126	134
A2ML1_61349_AAATACTTACTGGTATCGAG	A2ML1	145.83	260.68	0.83363	6731.7	1589.3	2.8808	0.99802	0.0019836	0.0039672	0.024464	TRUE	158	218	79	115
A2ML1_61350_ACCCTGGTTACTGATAACAA	A2ML1	53.894	145.14	1.4126	4407.5	425.52	4.4233	1	4.8816e-06	9.7631e-06	0.00013926	TRUE	67	100	37	70
A2ML1_61351_GGTGGATTATTACATCGACC	A2ML1	76.086	148	0.95081	2656.2	670.72	2.7769	0.99725	0.0027484	0.0054968	0.031453	TRUE	153	149	76	83
A2ML1_61352_TGGTCACTACCCCTATCAAG	A2ML1	232.48	226.3	-0.038719	19.115	2958.3	0.11368	0.45474	0.54526	0.90948	0.95644	FALSE	213	214	189	186
A3GALT2_59377_AAATAATGGGAGCCCCCCAG	A3GALT2	318.08	342.79	0.10762	305.48	4497.2	0.36852	0.64376	0.35624	0.71249	0.83898	TRUE	357	346	220	218
A3GALT2_59378_ACACGTAGTACATCACGCTC	A3GALT2	354.01	191.93	-0.87981	13438	5189.5	2.25	0.012225	0.98777	0.02445	0.094952	FALSE	202	240	212	313
A3GALT2_59379_AGAACATGAAGTGCGCCTCG	A3GALT2	1046.2	788.71	-0.40711	33309	22226	1.727	0.042086	0.95791	0.084171	0.22205	FALSE	973	909	763	991
A3GALT2_59380_GCGCTGGCAAGACGTGTCGA	A3GALT2	851.74	701.82	-0.27895	11264	16855	1.1548	0.12409	0.87591	0.24819	0.44813	FALSE	617	596	608	735
A4GALT_39715_AACGTGCCAGTAGATCATGA	A4GALT	324.42	227.26	-0.51165	4757.7	4617.5	1.4299	0.076372	0.92363	0.15274	0.32932	FALSE	189	184	210	226
A4GALT_39716_AGGCCAGGAACGCGCCGTTG	A4GALT	201.84	205.29	0.024373	5.9718	2449.9	0.069821	0.52782	0.47218	0.94436	0.97348	TRUE	180	183	107	141
A4GALT_39717_CCACATGAGTGCGATCCTGG	A4GALT	497.73	339.93	-0.54878	12563	8191.8	1.7435	0.040626	0.95937	0.081253	0.21676	FALSE	502	480	393	466
A4GALT_39718_GCCGCGTACCAGTCGGCCAG	A4GALT	101.45	104.08	0.036595	3.4635	981.6	0.084004	0.53319	0.46681	0.93362	0.96858	TRUE	146	123	111	151
A4GNT_37955_ACGGAACAGGAGACCAAATG	A4GNT	339.22	337.07	-0.009149	2.3127	4901.4	0.03072	0.48775	0.51225	0.97549	0.98819	FALSE	256	251	235	296
A4GNT_37956_CAGCCAAAAAGTTCTCCTCA	A4GNT	199.73	372.4	0.89548	15263	2415.8	3.5131	0.99978	0.0002215	0.00044299	0.004085	TRUE	256	153	69	83
A4GNT_37957_CAGCTCGGATGCATCCCGCC	A4GNT	331.82	422.05	0.34608	4085.3	4758.9	1.308	0.90456	0.095444	0.19089	0.38011	TRUE	239	311	324	347
A4GNT_37958_TGCATTCCCACAAAAAGGGG	A4GNT	464.97	508.94	0.13009	967.22	7477.1	0.50851	0.69445	0.30555	0.6111	0.76967	TRUE	364	369	331	389
AAAS_21269_CCCAGGGTGAGACAGCACTT	AAAS	115.19	224.39	0.95601	6125.5	1161.7	3.2041	0.99932	0.00067775	0.0013555	0.010358	TRUE	200	108	62	58
AAAS_21270_GCCAAGACAGAGGCACTAAG	AAAS	230.37	228.21	-0.013529	2.332	2922.5	0.039949	0.48406	0.51594	0.96812	0.98477	FALSE	355	322	157	192
AAAS_21271_GGCCCATCGACAGAGTGCCA	AAAS	83.483	63.021	-0.40012	210.38	758.29	0.74309	0.22778	0.77222	0.45555	0.64983	FALSE	151	134	39	60
AAAS_21272_TGACAGCGCCCTGATAGAGT	AAAS	66.575	47.743	-0.4713	178.54	562.25	0.79421	0.21157	0.78843	0.42314	0.62032	FALSE	75	68	31	40
AACS_48543_AGAGCTACGAGTATGTCTAC	AACS	245.17	494.62	1.0096	32051	3175.7	4.4266	1	4.7868e-06	9.5737e-06	0.00013679	TRUE	123	138	169	186
AACS_48544_CACATTCACACCGAAGTCCG	AACS	783.05	382.9	-1.0302	82567	15053	3.2615	0.00055417	0.99945	0.0011083	0.0087969	FALSE	756	709	510	594
AACS_48545_CATCCTCCTGTGCTACACCA	AACS	172.25	177.6	0.043909	14.333	1983.5	0.12022	0.54782	0.45218	0.90436	0.95385	TRUE	227	179	173	187
AACS_48546_CTTCTCACGTGTGTATGATG	AACS	246.22	211.98	-0.2151	587.13	3194	0.60592	0.27228	0.72772	0.54456	0.72138	FALSE	293	259	173	217
AADAC_21_AAGTCTGAAGCACTAAGAAG	AADAC	321.25	443.05	0.46255	7465.7	4557.3	1.8043	0.96441	0.035592	0.071185	0.19827	TRUE	280	361	233	273
AADAC_22_ATGTATATAATGCCTTAAGG	AADAC	247.28	369.53	0.57763	7547.5	3212.3	2.157	0.9845	0.015503	0.031007	0.11258	TRUE	263	251	186	223
AADAC_23_ATTTCTATCCAAATCACTCA	AADAC	171.19	169.01	-0.018407	2.3828	1967.3	0.049218	0.48034	0.51966	0.96069	0.98121	FALSE	190	143	115	118
AADAC_24_GGTATTTCTGGAGATAGTGC	AADAC	360.35	186.2	-0.94884	15570	5314.3	2.389	0.0084477	0.99155	0.016895	0.072818	FALSE	358	440	284	342
AADACL2_69621_AAAGAAAGTCAGAAACCCGA	AADACL2	129.98	86.892	-0.57554	937.61	1363.9	1.1667	0.12147	0.87853	0.24294	0.44259	FALSE	164	114	104	106
AADACL2_69622_GAAAAAATTTGACTGCAGCA	AADACL2	68.689	81.163	0.23757	77.941	585.94	0.51534	0.69615	0.30385	0.60769	0.76687	TRUE	70	95	37	50
AADACL2_69623_GTGATGTATTCATCTGAAAG	AADACL2	142.66	116.49	-0.2901	343.26	1543.5	0.66607	0.25258	0.74742	0.50516	0.69089	FALSE	130	140	80	113
AADACL2_69624_TGGGGGCAATTTAGCAACAG	AADACL2	81.37	127.95	0.64664	1098.7	732.99	1.7205	0.95728	0.042724	0.085448	0.2243	TRUE	122	105	38	40
AADACL3_59221_ACTTATGCTTAGGTAACTTG	AADACL3	199.73	296.96	0.5699	4773.6	2415.8	1.9783	0.97605	0.023947	0.047894	0.15184	TRUE	150	138	114	125
AADACL3_59222_CTGCGGTGACAGTTTCGGAG	AADACL3	71.859	80.208	0.15652	34.882	621.92	0.3348	0.63038	0.36962	0.73924	0.85615	TRUE	80	119	35	42
AADACL3_59223_GGCATCGTGTACTACCACGG	AADACL3	294.83	300.78	0.028719	17.69	4063.2	0.093313	0.53717	0.46283	0.92566	0.96476	TRUE	290	311	175	196
AADACL3_59224_TCGGGGTCATACTTTAGCGG	AADACL3	346.61	510.85	0.55824	13613	5044.9	2.3123	0.98962	0.010381	0.020762	0.084143	TRUE	234	246	222	219
AADACL4_69485_CAAGGTAGCAGGGATATCCG	AADACL4	329.71	322.74	-0.0307	24.241	4718.4	0.10137	0.45963	0.54037	0.91926	0.9613	FALSE	188	225	213	233
AADACL4_69486_GTAAACTCACCAAAGTGACC	AADACL4	113.07	122.22	0.11131	41.877	1133.5	0.27178	0.60695	0.39305	0.7861	0.88581	TRUE	79	133	67	79
AADACL4_69487_TAGAAGATGATGCCTCGCCG	AADACL4	151.11	223.44	0.56115	2640.1	1666.3	1.7717	0.96177	0.038226	0.076452	0.20793	TRUE	111	78	80	85
AADACL4_69488_TATCGTCCCAAAACGCAGGT	AADACL4	295.89	235.85	-0.32595	1808.1	4082.7	0.93964	0.1737	0.8263	0.3474	0.55162	FALSE	225	181	214	272
AADAT_38015_AGATCCATTTGTCCTTGACT	AADAT	137.38	143.23	0.059754	17.123	1468	0.15273	0.56062	0.43938	0.87876	0.9393	TRUE	153	224	80	89
AADAT_38016_ATTGATACTTACCCAGCACT	AADAT	478.71	364.76	-0.39127	6522.2	7774.8	1.2923	0.098122	0.90188	0.19624	0.38704	FALSE	499	301	289	341
AADAT_38017_GTAGCTGACATATTGAGCAG	AADAT	91.937	109.81	0.25375	160.01	861.57	0.60887	0.72846	0.27154	0.54308	0.72058	TRUE	116	78	61	49
AADAT_38018_TAATAATGTTGCAGCCCAGT	AADAT	168.02	370.49	1.1361	21275	1918.9	4.6219	1	1.9018e-06	3.8036e-06	5.8804e-05	TRUE	185	216	103	155
AAED1_64357_CATCTGCAAGGAATACGTAG	AAED1	91.937	192.88	1.0608	5265.6	861.57	3.439	0.99971	0.00029214	0.00058427	0.0051799	TRUE	116	119	55	91
AAED1_64358_GACATGTTATGTCTTACCTG	AAED1	227.2	164.24	-0.46578	1995.3	2868.9	1.1755	0.11988	0.88012	0.23976	0.43903	FALSE	166	161	126	167
AAED1_64359_GTCATCCTACCATCATATTG	AAED1	566.42	374.3	-0.59635	18650	9743.2	1.9463	0.025811	0.97419	0.051621	0.15977	FALSE	383	363	343	393
AAED1_64360_TCCCGGAACAGCGCGCCGAA	AAED1	524.15	224.39	-1.2203	46887	8780.2	3.199	0.00068952	0.99931	0.001379	0.010511	FALSE	526	504	365	455
AAGAB_49735_AGCAGACATCAATCTATGTG	AAGAB	341.33	872.74	1.3518	148700	4942.3	7.5591	1	2.0299e-14	4.0598e-14	1.4914e-12	TRUE	356	565	271	260
AAGAB_49736_CAAGAATGGTGCATCAAACA	AAGAB	99.334	212.93	1.0923	6681	954.59	3.6768	0.99988	0.00011818	0.00023635	0.0023917	TRUE	296	232	50	63
AAGAB_49737_CACTACATTGGACCACACAT	AAGAB	163.8	83.073	-0.97097	3350	1854.9	1.8743	0.030377	0.96962	0.060753	0.17844	FALSE	44	73	112	169
AAGAB_49738_GCCATGAGGAGACACTATCA	AAGAB	221.92	282.64	0.34755	1850.3	2780.3	1.1516	0.87525	0.12475	0.24949	0.44964	TRUE	123	119	135	180
AAK1_30987_CAAAACTCCTATTATCCACC	AAK1	141.6	149.91	0.0817	34.524	1528.3	0.21253	0.58409	0.41591	0.83181	0.91255	TRUE	72	74	68	111
AAK1_30988_CAAAAGGCCGGATATTTACC	AAK1	402.62	275	-0.54834	8217.1	6165.2	1.6254	0.052042	0.94796	0.10408	0.25565	FALSE	462	386	315	384
AAK1_30989_GGGTGCAATTGAAGTCTCTG	AAK1	86.653	92.621	0.095029	17.814	796.63	0.21145	0.58329	0.41671	0.83343	0.91355	TRUE	29	58	76	76
AAK1_30990_TGGCAAAATCATCACTACGA	AAK1	23.248	62.066	1.379	796.81	141.38	3.2647	0.99944	0.00056217	0.0011243	0.0089011	TRUE	18	12	11	13
AAMDC_36255_AAATTGCTTCCTTATCATGG	AAMDC	109.9	105.99	-0.051815	7.654	1091.5	0.11842	0.45263	0.54737	0.90525	0.95437	FALSE	159	146	104	137
AAMDC_36256_AAGTATGGCCAGGGGGTAGT	AAMDC	491.39	386.72	-0.34479	5497.5	8052.2	1.1664	0.12172	0.87828	0.24343	0.44308	FALSE	545	523	425	480
AAMDC_36257_AGGTACTCCACAGTTGATGA	AAMDC	232.48	180.47	-0.36361	1358.2	2958.3	0.95635	0.16944	0.83056	0.33888	0.54325	FALSE	208	151	141	150
AAMDC_36258_GATTGGCCGAGGGATGAGTG	AAMDC	299.06	305.56	0.030897	21.096	4141.3	0.10093	0.5402	0.4598	0.9196	0.96148	TRUE	303	280	153	202
AAMP_25_AAGATGACAAAGCCTTCGTA	AAMP	113.07	244.44	1.1054	8941.7	1133.5	3.902	0.99995	4.771e-05	9.542e-05	0.0010829	TRUE	93	81	75	93
AAMP_26_AGGTGACCTCGCTATCGTCG	AAMP	222.97	117.45	-0.91908	5708.3	2797.9	1.995	0.02301	0.97699	0.04602	0.14759	FALSE	140	166	111	136
AAMP_27_TGAGTGGCCTCTTGAAAGTG	AAMP	12.681	132.73	3.289	9202.6	64.384	14.961	1	7.0211e-51	1.4042e-50	1.8154e-48	TRUE	9	23	4	0
AAMP_28_TGGATGTGGAAAGTCCCGAA	AAMP	61.291	58.246	-0.072304	4.6366	504.13	0.13562	0.4443	0.5557	0.8886	0.94476	FALSE	36	38	31	30
AANAT_29_ACCTTCACGCTCGATCTCAA	AANAT	496.67	211.02	-1.231	42609	8168.5	3.1605	0.00078739	0.99921	0.0015748	0.011681	FALSE	262	243	412	484
AANAT_30_GCCCTCCTCGAACCAGCCCA	AANAT	1009.2	801.13	-0.33273	21718	21175	1.4298	0.07638	0.92362	0.15276	0.32935	FALSE	827	872	610	742
AANAT_31_GGTGAGGCAGCGAAACTCAC	AANAT	612.91	433.51	-0.49866	16214	10832	1.7238	0.042369	0.95763	0.084738	0.22304	FALSE	405	455	403	505
AANAT_32_GTGGCGCCGCTGACAGCTCG	AANAT	787.28	613.02	-0.36042	15242	15162	1.4152	0.078509	0.92149	0.15702	0.33525	FALSE	653	664	504	613
AAR2_34255_CATGTTCAGGATGACCACAG	AAR2	361.41	518.49	0.51948	12437	5335.2	2.1505	0.98424	0.015756	0.031512	0.11382	TRUE	289	305	180	269
AAR2_34256_CTTGGTTATCTCAGCTGGCG	AAR2	514.64	605.38	0.23387	4124.1	8567.2	0.9804	0.83656	0.16344	0.32689	0.53176	TRUE	393	417	387	454
AAR2_34257_GGGGTAGATTCTGCCCCACG	AAR2	529.43	544.27	0.039806	110.11	8899.2	0.1573	0.5625	0.4375	0.87501	0.93722	TRUE	624	589	340	440
AAR2_34258_TAAGGAAGAAACCCATACGA	AAR2	80.313	104.08	0.36993	283.61	720.43	0.88548	0.81179	0.18821	0.37642	0.57878	TRUE	65	100	22	42
AARD_73105_GCAGAGCTGGACGGGCGTTG	AARD	150.06	141.32	-0.085974	38.194	1650.8	0.21508	0.41479	0.58521	0.82957	0.91136	FALSE	96	93	89	94
AARD_73106_GGGAAATTCTCTCTCTGCAG	AARD	175.42	95.486	-0.87062	3267.4	2032.2	1.7732	0.038054	0.96195	0.076107	0.20733	FALSE	144	171	136	147
AARD_73107_GTCCCCGAAGAAGTCGCACG	AARD	393.11	438.28	0.15654	1020.9	5970.9	0.58456	0.72058	0.27942	0.55884	0.73191	TRUE	358	358	239	267
AARD_73108_TGCTGGAGGACCTCAGACGA	AARD	508.3	211.98	-1.2578	45934	8425.9	3.2281	0.00062304	0.99938	0.0012461	0.0096904	FALSE	419	380	334	460
AARS_33_CCAAGAAAAGCATTGACACA	AARS	161.68	428.73	1.4014	37694	1823.1	6.2543	1	1.9961e-10	3.9922e-10	1.0591e-08	TRUE	163	172	104	106
AARS_34_GGAGGCCAGATCTATGACGA	AARS	5.2837	231.08	5.2068	39269	20.959	49.32	1	0	0	0	TRUE	4	8	2	0
AARS_35_TCAGAATGTGCGTAGCTGTG	AARS	210.29	488.89	1.2132	40483	2587.7	5.4766	1	2.1674e-08	4.3348e-08	9.132e-07	TRUE	116	122	143	161
AARS_36_TTGGTGCTGAGGATGCCGAT	AARS	320.19	491.75	0.61742	14884	4537.2	2.5469	0.99457	0.0054338	0.010868	0.052666	TRUE	251	276	216	242
AARS2_45659_AGCAAACTGGGGTCGCCGCG	AARS2	73.972	68.75	-0.10417	13.642	646.2	0.20544	0.41756	0.58244	0.83512	0.91464	FALSE	47	38	41	29
AARS2_45660_CCAACTTCTACGCAGAACAG	AARS2	16.908	60.156	1.7719	1022.8	93.436	4.4741	1	3.9963e-06	7.9925e-06	0.00011613	TRUE	0	1	0	1
AARS2_45661_GCTGAGCCAGTTCAGAAGCA	AARS2	114.13	107.9	-0.080256	19.408	1147.6	0.1839	0.42683	0.57317	0.85366	0.9259	FALSE	135	89	108	126
AARS2_45662_TCGTAGTGGATCTCAGTACA	AARS2	243.05	396.27	0.70292	11911	3139.2	2.7346	0.99688	0.0031229	0.0062458	0.034675	TRUE	273	276	186	244
AARSD1_51303_ACCTCCGCTCCCAATCTACC	AARSD1	182.82	241.58	0.40018	1734.8	2147.2	1.2681	0.89762	0.10238	0.20476	0.39764	TRUE	70	51	87	104
AARSD1_51304_CATTCGGGTTGTTAACATCG	AARSD1	92.994	123.18	0.40176	457.75	874.71	1.0205	0.84614	0.15386	0.30773	0.51207	TRUE	119	96	53	101
AARSD1_51305_CCCAGACAGAAATATCAGGT	AARSD1	124.7	135.59	0.11991	59.363	1290.7	0.30322	0.61904	0.38096	0.76192	0.87068	TRUE	166	128	137	167
AARSD1_51306_GTGCTGAGAGTGACTCGCCG	AARSD1	264.19	197.66	-0.41674	2224.8	3508.9	1.1231	0.13068	0.86932	0.26137	0.4632	FALSE	251	181	232	241
AASDH_60113_AAATGAGTTGATAATGACGG	AASDH	708.02	676.04	-0.066586	511.45	13147	0.27891	0.39016	0.60984	0.78031	0.88179	FALSE	595	606	527	648
AASDH_60114_GACAGTCAGATCAAACGTCA	AASDH	15.851	65.885	1.9888	1397.1	85.935	5.3974	1	3.5356e-08	7.0711e-08	1.4429e-06	TRUE	32	14	15	9
AASDH_60115_TGTGAATTGCCTGTACAACT	AASDH	470.25	543.32	0.20794	2672.5	7591.2	0.83857	0.79914	0.20086	0.40171	0.60161	TRUE	392	534	364	466
AASDH_60116_TTGTTGGTACATCAGTACCT	AASDH	182.82	263.54	0.52522	3285.2	2147.2	1.7421	0.95925	0.040749	0.081497	0.21721	TRUE	151	160	89	117
AASDHPPT_46927_AGGAAAACCAGTTCTTGCAA	AASDHPPT	59.178	222.48	1.8929	14693	481.33	7.4435	1	4.9203e-14	9.8407e-14	3.533e-12	TRUE	151	149	37	54
AASDHPPT_46928_CCCGAGGAGAAGGAGCGCAT	AASDHPPT	26.419	44.878	0.74265	173.32	167.03	1.4283	0.9218	0.078201	0.1564	0.33432	TRUE	55	27	1	9
AASDHPPT_46929_CTGCCAGCAGCCATTCGGCT	AASDHPPT	538.94	825	0.61334	41374	9114.3	2.9963	0.99863	0.0013662	0.0027324	0.018168	TRUE	590	624	395	506
AASDHPPT_46930_GCTGAACCTGAGCTGCAAGT	AASDHPPT	160.63	190.97	0.24824	461.31	1807.3	0.71382	0.76231	0.23769	0.47538	0.66671	TRUE	225	240	128	160
AASS_27193_AAGACCTCAGAAAAGTGTAT	AASS	360.35	407.73	0.17773	1123.2	5314.3	0.64986	0.74211	0.25789	0.51579	0.69898	TRUE	362	321	233	260
AASS_27194_CATCACAAACAAAGTTAACA	AASS	163.8	116.49	-0.48811	1126.9	1854.9	1.0983	0.13597	0.86403	0.27194	0.47473	FALSE	211	146	120	103
AASS_27195_CGTGCTCAGTCACTTTCAAT	AASS	131.04	154.69	0.23771	280.15	1378.6	0.63697	0.73787	0.26213	0.52426	0.70563	TRUE	189	174	117	107
AASS_27196_GGGTAGTGGCATTTGGACAG	AASS	252.56	471.7	0.89858	24587	3304.3	3.8122	0.99993	6.8855e-05	0.00013771	0.0014932	TRUE	422	352	161	223
AATF_35171_AAACCACCTCTAGAAAAGCA	AATF	64.462	111.72	0.784	1137.4	538.81	2.0359	0.97906	0.02094	0.04188	0.13849	TRUE	21	37	21	22
AATF_35172_AGAAACTTTGACACTAGAGA	AATF	96.164	154.69	0.68016	1736.4	914.43	1.9353	0.9735	0.026495	0.05299	0.16266	TRUE	114	112	59	79
AATF_35173_AGGCACTTAAAGCATTGTTG	AATF	25.362	120.31	2.2022	5124.9	158.36	7.5451	1	2.3097e-14	4.6194e-14	1.693e-12	TRUE	56	26	30	44
AATF_35174_GAATATGATGAGGACGACCT	AATF	220.86	258.77	0.22757	719.58	2762.6	0.7212	0.7646	0.2354	0.47079	0.66307	TRUE	188	201	102	133
AATK_25397_AGCACCGGAACCACGCCCGG	AATK	910.92	610.16	-0.57736	45680	18448	2.2143	0.013403	0.9866	0.026805	0.10133	FALSE	1007	984	714	722
AATK_25398_CTCCTCAAGTCCACAGACGT	AATK	768.26	506.08	-0.60126	34741	14672	2.1645	0.015213	0.98479	0.030426	0.11104	FALSE	496	553	466	521
AATK_25399_GCATAGCAACCTGCTCGTCG	AATK	211.35	159.46	-0.40421	1352.8	2605.1	1.0166	0.15465	0.84535	0.30931	0.51374	FALSE	223	152	136	175
AATK_25400_GTGTCAGCCAACAACAACAG	AATK	233.54	148	-0.6545	3705.5	2976.3	1.5679	0.058442	0.94156	0.11688	0.27569	FALSE	234	235	188	238
ABAT_37_CCTTAAAGACCATCTTCATG	ABAT	85.597	110.76	0.36807	318	783.79	0.89894	0.81545	0.18455	0.36909	0.57179	TRUE	116	92	18	30
ABAT_38_GAAAGAAGTCATCGGATGCG	ABAT	234.6	306.51	0.38431	2597.2	2994.3	1.3142	0.90561	0.094394	0.18879	0.37744	TRUE	203	190	86	68
ABAT_39_GTGAATGGCTTTAGAGTGCG	ABAT	416.36	363.8	-0.19418	1382.7	6448.6	0.65449	0.2564	0.7436	0.5128	0.69624	FALSE	503	533	330	362
ABAT_40_TGCAATTACGAAGAGAGCCG	ABAT	720.7	390.54	-0.88225	55763	13465	2.8453	0.0022182	0.99778	0.0044364	0.026672	FALSE	411	388	582	759
ABCA1_41_AATGCAGAGAAAGCTATCTG	ABCA1	274.75	330.38	0.26511	1550.5	3697.7	0.91479	0.81985	0.18015	0.3603	0.56361	TRUE	305	206	237	248
ABCA1_42_GGACACGCCCAGCTTCAAGT	ABCA1	485.05	189.06	-1.3546	46145	7913.1	3.3273	0.00043839	0.99956	0.00087679	0.0072775	FALSE	381	389	380	490
ABCA1_43_GTGGCATGGCAGGACTACGT	ABCA1	127.87	87.847	-0.53648	807.78	1334.5	1.0955	0.13645	0.86355	0.2729	0.47575	FALSE	254	158	72	107
ABCA1_44_TTGGACAGCCCAAGACATCG	ABCA1	289.55	252.08	-0.19917	702.69	3966.2	0.59491	0.27595	0.72405	0.5519	0.72715	FALSE	401	351	251	317
ABCA10_27825_ACTCTCTGAAATAACTGACA	ABCA10	242	293.14	0.27558	1311	3121	0.91553	0.82004	0.17996	0.35992	0.56317	TRUE	389	367	181	193
ABCA10_27826_GACACTTCAGTGAATGCACG	ABCA10	1207.9	717.1	-0.7514	122450	26971	2.9883	0.0014028	0.9986	0.0028055	0.018566	FALSE	935	823	911	1138
ABCA10_27827_GGGTACTGAAGAGGATAAGT	ABCA10	98.278	199.57	1.0145	5287	941.15	3.3016	0.99952	0.00048096	0.00096192	0.0078445	TRUE	131	82	79	94
ABCA10_27828_TCCTTATTAAAACACTCATG	ABCA10	156.4	231.08	0.56017	2814.7	1744.3	1.7881	0.96311	0.036887	0.073774	0.20308	TRUE	165	222	122	143
ABCA12_34679_ACGGTCATATAATACACAAG	ABCA12	96.164	111.72	0.21423	121.14	914.43	0.51438	0.69628	0.30372	0.60744	0.76669	TRUE	79	64	76	80
ABCA12_34680_ATGGTGCTAAATGATCCTTG	ABCA12	287.44	217.71	-0.39924	2442.6	3927.5	1.1126	0.13293	0.86707	0.26587	0.46836	FALSE	280	213	192	227
ABCA12_34681_GAGGTGATACCCATCGCCAA	ABCA12	154.29	153.73	-0.0051452	0.15281	1713	0.013357	0.49462	0.50538	0.98925	0.99491	FALSE	349	382	176	245
ABCA12_34682_GGCAGCTATAAATACAACCC	ABCA12	199.73	136.54	-0.54532	2013.8	2415.8	1.2854	0.099298	0.9007	0.1986	0.39003	FALSE	380	369	187	200
ABCA13_62905_ACAATTTAGCTGATTCGGCG	ABCA13	354.01	400.09	0.17605	1062.5	5189.5	0.6396	0.73878	0.26122	0.52243	0.704	TRUE	397	495	236	307
ABCA13_62906_CAATGACTTCCATAATTGGG	ABCA13	747.12	562.41	-0.40908	17144	14132	1.5538	0.06012	0.93988	0.12024	0.28095	FALSE	593	480	542	680
ABCA13_62907_GGCTTCATTTAATAACACTG	ABCA13	85.597	47.743	-0.82912	731.45	783.79	1.3521	0.087154	0.91285	0.17431	0.35821	FALSE	30	30	19	15
ABCA13_62908_TATCAGGAAGACTTGCGAAG	ABCA13	682.66	669.36	-0.028349	88.483	12518	0.1189	0.45268	0.54732	0.90536	0.95437	FALSE	456	527	386	472
ABCA2_45_CATGTACGTGGCGATCCGAG	ABCA2	935.22	562.41	-0.73266	70605	19114	2.6966	0.0035026	0.9965	0.0070051	0.037798	FALSE	641	622	703	839
ABCA2_46_CTTGTGTGGCAACAACCGGT	ABCA2	66.575	80.208	0.26513	93.131	562.25	0.57495	0.71663	0.28337	0.56674	0.73875	TRUE	44	46	24	28
ABCA2_47_GATGTCGTGCCCGTAGATGG	ABCA2	340.27	209.11	-0.69975	8727.4	4921.8	1.8695	0.030773	0.96923	0.061547	0.17993	FALSE	406	400	272	317
ABCA2_48_TAGGGGATGAAATTGCCACG	ABCA2	209.24	361.89	0.78753	11868	2570.4	3.011	0.9987	0.0013019	0.0026038	0.017476	TRUE	259	219	142	215
ABCA3_49_AATGCGCATTTACTGACCGA	ABCA3	718.59	845.05	0.23357	8009.4	13412	1.092	0.86258	0.13742	0.27483	0.4779	TRUE	545	675	574	734
ABCA3_50_ACCTACGGTTCAGTTACACA	ABCA3	164.85	194.79	0.23941	448.94	1870.9	0.69217	0.75557	0.24443	0.48887	0.67796	TRUE	114	107	85	109
ABCA3_51_AGTGGACGGGCATACATCAG	ABCA3	586.5	630.21	0.10354	955.68	10209	0.43261	0.66735	0.33265	0.6653	0.80764	TRUE	547	615	384	493
ABCA3_52_CCTCCTGAGTCCCGTCAACG	ABCA3	161.68	243.49	0.58771	3381	1823.1	1.9159	0.97231	0.027689	0.055379	0.16757	TRUE	154	231	108	113
ABCA4_61_AAAGACCGAGCCCCTAACAG	ABCA4	162.74	266.41	0.70763	5454.1	1839	2.4174	0.99218	0.0078168	0.015634	0.068765	TRUE	256	261	127	149
ABCA4_62_AGCACCATACCCGCAAACAG	ABCA4	47.554	78.298	0.70771	479.87	360.88	1.6184	0.94689	0.053114	0.10623	0.25917	TRUE	41	33	1	7
ABCA4_63_AGGGTGTTGAGTTGCCACAG	ABCA4	145.83	107.9	-0.43117	723.48	1589.3	0.95149	0.17057	0.82943	0.34114	0.54544	FALSE	205	195	119	145
ABCA4_64_GATCCGAATGGACATAGACG	ABCA4	77.143	142.27	0.8746	2169.9	683.06	2.4921	0.99364	0.0063601	0.01272	0.059113	TRUE	59	47	23	31
ABCA5_32859_AAAATGAATGATACCTCAGG	ABCA5	140.55	242.53	0.78284	5296.1	1513.2	2.6218	0.99563	0.0043741	0.0087482	0.044839	TRUE	135	167	111	157
ABCA5_32860_AAATTATGAGGAGTTATCAG	ABCA5	155.34	76.389	-1.0145	3212.7	1728.6	1.899	0.028693	0.97131	0.057386	0.17168	FALSE	157	89	125	131
ABCA5_32861_GAAATAGATACCTTTCCCCG	ABCA5	131.04	43.924	-1.5554	4063.4	1378.6	2.3462	0.0092772	0.99072	0.018554	0.077799	FALSE	153	101	83	92
ABCA5_32862_TGACAGTGACTATGTATCCG	ABCA5	69.745	95.486	0.44768	333.32	597.87	1.0527	0.85345	0.14655	0.2931	0.49763	TRUE	69	69	32	43
ABCA6_32855_AACCAATCACCCTGTGATGG	ABCA6	587.55	561.46	-0.065426	340.5	10234	0.25794	0.39823	0.60177	0.79645	0.89218	FALSE	547	591	445	484
ABCA6_32856_CAGACAGCTGTGAGTGACAT	ABCA6	917.26	748.61	-0.29276	14258	18621	1.2359	0.10825	0.89175	0.2165	0.41168	FALSE	749	701	615	753
ABCA6_32857_GGCACCAAATAAAACACACA	ABCA6	255.73	233.94	-0.12797	237.57	3359.8	0.37597	0.35347	0.64653	0.70693	0.8354	FALSE	327	257	224	296
ABCA6_32858_TTGTATATGAGTCTCCTGAA	ABCA6	169.08	370.49	1.1271	21042	1935	4.5786	1	2.3409e-06	4.6818e-06	7.13e-05	TRUE	216	199	119	154
ABCA7_27821_AGTACGGGATCCCTGAACCA	ABCA7	674.21	753.38	0.15997	3137.1	12311	0.71362	0.76227	0.23773	0.47546	0.6668	TRUE	488	531	489	553
ABCA7_27822_CTGGCCTAGACGTAACCCTA	ABCA7	450.17	203.39	-1.1424	31622	7159.9	2.9166	0.0017695	0.99823	0.0035389	0.022298	FALSE	364	356	354	442
ABCA7_27823_TCAAACAGCACGTTGTACTG	ABCA7	336.05	257.81	-0.38104	3073.6	4840.2	1.1245	0.1304	0.8696	0.26079	0.46254	FALSE	256	181	250	322
ABCA7_27824_TGGACATTGACGTGGTCACG	ABCA7	486.1	336.11	-0.53101	11344	7936.3	1.6837	0.04612	0.95388	0.09224	0.23565	FALSE	222	220	360	397
ABCA8_27833_AAATTATCAGCCAAAAGCGA	ABCA8	56.008	47.743	-0.22596	34.207	447.64	0.39063	0.34538	0.65462	0.69076	0.82485	FALSE	22	36	49	51
ABCA8_27834_CTGTTAATGTCACAAGAGAG	ABCA8	291.66	189.06	-0.62277	5324.7	4004.9	1.6213	0.052479	0.94752	0.10496	0.25706	FALSE	202	272	171	193
ABCA8_27835_GACACCCCCAAAAGACAGTG	ABCA8	250.45	294.1	0.23092	954.08	3267.4	0.76359	0.77744	0.22256	0.44512	0.6406	TRUE	279	234	198	200
ABCA8_27836_GCAAATCTGCGCAATTGCAA	ABCA8	143.72	42.969	-1.7187	5509.8	1558.7	2.5519	0.0052221	0.99478	0.010444	0.051167	FALSE	74	92	84	99
ABCA9_27829_ATATCAGAAAAGTTACCCGT	ABCA9	103.56	134.64	0.37538	484.86	1008.8	0.97834	0.83596	0.16404	0.32809	0.53289	TRUE	225	247	75	102
ABCA9_27830_CTTGATAGATGTTCTAACCA	ABCA9	107.79	141.32	0.38761	564.73	1063.8	1.0281	0.84797	0.15203	0.30406	0.50833	TRUE	31	49	45	71
ABCA9_27831_TGGCAGGAAGAACAATCATG	ABCA9	330.76	347.57	0.071295	141.26	4738.6	0.24415	0.59644	0.40356	0.80711	0.89885	TRUE	400	436	173	227
ABCA9_27832_TTATTTCTAACTAGACAGGA	ABCA9	146.89	84.028	-0.7985	2013.7	1604.6	1.5692	0.05818	0.94182	0.11636	0.27494	FALSE	184	132	156	173
ABCB1_13833_ATTGACAGCTATTCGAAGAG	ABCB1	723.87	514.67	-0.49128	22041	13544	1.7976	0.036121	0.96388	0.072242	0.20041	FALSE	659	728	470	534
ABCB1_13834_CTGGAGAGATCCTCACCAAG	ABCB1	215.58	182.38	-0.24006	552.03	2674.8	0.64191	0.26046	0.73954	0.52091	0.70328	FALSE	288	216	150	187
ABCB1_13835_TAGGTGATATCAATGATACA	ABCB1	543.17	444.96	-0.28712	4834	9210.3	1.0233	0.15309	0.84691	0.30618	0.51043	FALSE	265	292	363	489
ABCB1_13836_TTTATAGTAGGATTTACACG	ABCB1	264.19	183.33	-0.5247	3295.8	3508.9	1.3649	0.086132	0.91387	0.17226	0.35553	FALSE	342	255	201	222
ABCB10_32847_ACAGCAATGATTGACACTGG	ABCB10	520.98	594.88	0.19103	2733.7	8709.1	0.79189	0.78579	0.21421	0.42843	0.62531	TRUE	407	521	256	333
ABCB10_32848_CTCAGTGCCGTGTTTCTGTG	ABCB10	393.11	422.05	0.10222	418.83	5970.9	0.37449	0.64598	0.35402	0.70804	0.83611	TRUE	411	330	241	287
ABCB10_32849_GAGTTCACCCACGGTCATGT	ABCB10	559.02	528.99	-0.079506	450.91	9572.8	0.3069	0.37946	0.62054	0.75892	0.86883	FALSE	444	538	442	489
ABCB10_32850_TATCGCCGTTCACTGGCCTG	ABCB10	1294.5	997.83	-0.37522	44198	29610	1.7242	0.042338	0.95766	0.084675	0.22292	FALSE	925	923	853	1014
ABCB11_22553_GAGCTCCCCAGATTTAGCAA	ABCB11	145.83	127	-0.19806	177.59	1589.3	0.47246	0.31821	0.68179	0.63643	0.7877	FALSE	144	138	91	81
ABCB11_22554_GATTCTTTACTGGATTCGTG	ABCB11	512.52	486.02	-0.076437	351.17	8520	0.28709	0.38702	0.61298	0.77405	0.878	FALSE	469	504	315	367
ABCB11_22555_TCAACATGGTCATTAAACCA	ABCB11	1024	572.92	-0.8367	103850	21594	3.0696	0.0010718	0.99893	0.0021435	0.014945	FALSE	777	622	759	931
ABCB11_22556_TTTCAGAATCCTCCTAACTG	ABCB11	315.97	447.83	0.50183	8759.5	4457.3	1.9751	0.97587	0.02413	0.04826	0.15264	TRUE	286	265	203	249
ABCB4_13837_ACACCACTGAACTCAATACG	ABCB4	513.58	389.58	-0.39777	7724.2	8543.6	1.3415	0.089879	0.91012	0.17976	0.36546	FALSE	325	251	299	352
ABCB4_13838_CATTTCGGACCGTAGACAGT	ABCB4	454.4	221.53	-1.0332	27971	7250.2	2.7349	0.0031196	0.99688	0.0062392	0.034653	FALSE	473	412	317	435
ABCB4_13839_CCCTTCTCGAGCTAACGTCA	ABCB4	123.64	211.98	0.77295	3971.9	1276.2	2.4728	0.9933	0.0067047	0.013409	0.0615	TRUE	70	118	86	148
ABCB4_13840_TGGCCGTGGAAATGTAACCA	ABCB4	161.68	184.29	0.18771	255.78	1823.1	0.52942	0.70172	0.29828	0.59656	0.7588	TRUE	39	28	112	139
ABCB5_69133_AGACGTGGATAGAGTCACTA	ABCB5	13.738	5.7292	-1.131	33.521	71.401	0.94777	0.12619	0.87381	0.25237	0.45308	FALSE	13	24	16	25
ABCB5_69134_CAAAGGTCGGACTACAATCG	ABCB5	990.17	963.45	-0.039425	356.99	20640	0.18598	0.42623	0.57377	0.85246	0.92545	FALSE	977	735	575	741
ABCB5_69135_GAAACCTTCGCAATAGCCCG	ABCB5	399.45	554.77	0.47287	12144	6100.2	1.9887	0.97663	0.023369	0.046738	0.14922	TRUE	402	391	264	259
ABCB5_69136_TTTGGATTGGCAGATCATGG	ABCB5	306.46	179.51	-0.76828	8199.5	4278.8	1.9407	0.026148	0.97385	0.052297	0.16126	FALSE	323	291	234	301
ABCB6_26865_CGAAGTGGAACGCTATCGAG	ABCB6	395.22	256.86	-0.61974	9682.8	6013.9	1.7842	0.037193	0.96281	0.074386	0.20428	FALSE	310	191	229	304
ABCB6_26866_GCACGTAGGGAGAGATGCGA	ABCB6	196.56	214.84	0.12773	167.31	2364.8	0.37607	0.64656	0.35344	0.70688	0.8354	TRUE	259	248	85	66
ABCB6_26867_GGAACGGGCACTCAATGTGT	ABCB6	210.29	114.58	-0.87031	4684	2587.7	1.8815	0.029937	0.97006	0.059874	0.17668	FALSE	188	274	185	245
ABCB6_26868_TAGGTGCCAAACCAATTGAG	ABCB6	969.04	689.41	-0.49059	39378	20049	1.9749	0.024142	0.97586	0.048285	0.1527	FALSE	645	798	688	883
ABCB7_53_AGTCATTAAAAAGTATCACA	ABCB7	71.859	46.788	-0.60845	317.85	621.92	1.0053	0.1557	0.8443	0.31141	0.51612	FALSE	60	73	106	128
ABCB7_54_CACACCACAGACAGCTACCG	ABCB7	16.908	127.95	2.8482	7503	93.436	11.488	1	7.9206e-31	1.5841e-30	1.2886e-28	TRUE	22	21	4	14
ABCB7_55_GATTAAATACCAAAGCACTC	ABCB7	205.01	273.09	0.41194	2329.4	2501.4	1.3612	0.91328	0.086721	0.17344	0.35708	TRUE	174	145	173	160
ABCB7_56_TCACAGTTGCAGTCACACGG	ABCB7	21.135	48.698	1.1669	395.83	124.87	2.4666	0.99297	0.0070263	0.014053	0.063595	TRUE	16	12	21	28
ABCB8_30439_AAGTACACAAGGGACCACGT	ABCB8	507.24	296.96	-0.77038	22500	8402.4	2.294	0.010896	0.9891	0.021791	0.087233	FALSE	441	376	358	412
ABCB8_30440_CCTGCCCAAACAGGACAGAG	ABCB8	264.19	288.37	0.12589	292.49	3508.9	0.40821	0.65844	0.34156	0.68312	0.82004	TRUE	182	172	150	117
ABCB8_30441_CTTGGAACAAGGCGATGCCG	ABCB8	441.72	457.38	0.05014	122.58	6980.3	0.1874	0.57433	0.42567	0.85135	0.92472	TRUE	383	440	295	442
ABCB8_30442_TCTTTGACGCCAATAAGACA	ABCB8	122.58	92.621	-0.40057	451.03	1261.8	0.84348	0.19926	0.80074	0.39851	0.59883	FALSE	90	93	91	74
ABCB9_32851_GCCCCAGACGTAGTACATGT	ABCB9	82.426	39.149	-1.0551	968.05	745.61	1.5849	0.055295	0.9447	0.11059	0.26606	FALSE	90	100	42	39
ABCB9_32852_TGGACACCATCATGATGATG	ABCB9	210.29	380.99	0.85429	14885	2587.7	3.3556	0.9996	0.00039604	0.00079207	0.006684	TRUE	161	207	98	163
ABCB9_32853_TGTCCTGGGAGATTGTATGG	ABCB9	141.6	127	-0.15591	106.77	1528.3	0.37366	0.35423	0.64577	0.70847	0.83639	FALSE	213	199	103	114
ABCB9_32854_TTTGCCGCAGGTATTCGGGG	ABCB9	117.3	429.69	1.8642	53589	1190.1	9.0554	1	6.8066e-20	1.3613e-19	7.2257e-18	TRUE	71	129	51	53
ABCC1_11741_AAAATGTGATTGGCCCCAAG	ABCC1	471.31	507.03	0.10518	638.2	7614.1	0.40937	0.65886	0.34114	0.68227	0.81955	TRUE	508	403	280	366
ABCC1_11742_AACCTGACAGCATCGAGCGA	ABCC1	541.06	913.8	0.75502	70648	9162.3	3.8941	0.99995	4.9275e-05	9.855e-05	0.0011143	TRUE	628	572	333	426
ABCC1_11743_AGTACACGGAAAGCTTGACC	ABCC1	115.19	141.32	0.2927	342.37	1161.7	0.76675	0.7783	0.2217	0.44339	0.63896	TRUE	85	88	48	48
ABCC1_11744_TCTGCTTCGTCAGTGGCATG	ABCC1	705.91	765.8	0.11732	1794.1	13094	0.52337	0.69964	0.30036	0.60072	0.76184	TRUE	654	593	501	632
ABCC10_55151_AAGGGTGTCACCCTTAGCGG	ABCC10	120.47	93.576	-0.36104	363.05	1233	0.76589	0.22164	0.77836	0.44327	0.63889	FALSE	95	68	87	83
ABCC10_55152_CAAGATGAGACCACCCACGA	ABCC10	320.19	192.88	-0.72827	8232.9	4537.2	1.8901	0.029373	0.97063	0.058747	0.17442	FALSE	313	243	228	269
ABCC10_55153_CGTGTACCAAGCTTACTGGA	ABCC10	136.32	130.82	-0.059024	15.153	1453	0.14441	0.44249	0.55751	0.88498	0.94283	FALSE	118	122	84	98
ABCC10_55154_GGGCCCTGAGAATCCCAACA	ABCC10	48.61	75.434	0.62357	364.04	371.47	1.3917	0.91752	0.082484	0.16497	0.34609	TRUE	40	53	17	26
ABCC11_54807_AATACACATCACCTCAGGAG	ABCC11	246.22	189.06	-0.37934	1640.7	3194	1.0114	0.1559	0.8441	0.31181	0.51644	FALSE	281	275	206	181
ABCC11_54808_CAAAGACCAGAGCTTTGCTG	ABCC11	298	421.09	0.4974	7631.9	4121.7	1.9173	0.9724	0.027601	0.055203	0.1672	TRUE	307	337	238	248
ABCC11_54809_GACGGTCGGAATAGACGGCG	ABCC11	312.8	395.31	0.3368	3415.9	4397.6	1.2443	0.8933	0.1067	0.21339	0.40803	TRUE	336	390	297	299
ABCC11_54810_TAAGCTTTGGATCATGAGCG	ABCC11	292.72	244.44	-0.25904	1167.6	4024.3	0.76099	0.22333	0.77667	0.44666	0.6417	FALSE	348	267	184	291
ABCC12_56725_AAAGACCATTAGGATCGGGA	ABCC12	497.73	332.29	-0.58147	13823	8191.8	1.8279	0.033785	0.96621	0.06757	0.19141	FALSE	273	263	303	332
ABCC12_56726_ACGTACATTAAGGCTTCTGG	ABCC12	350.84	265.45	-0.40105	3663.3	5127.4	1.1925	0.11653	0.88347	0.23307	0.43111	FALSE	425	380	249	301
ABCC12_56727_GAGTCATATGTCGACAATGG	ABCC12	301.17	465.02	0.62501	13579	4180.4	2.5341	0.99436	0.0056373	0.011275	0.054097	TRUE	427	353	211	249
ABCC12_56728_GCCAACCCAGACTTTCCCAG	ABCC12	298	314.15	0.075873	130.37	4121.7	0.25149	0.59928	0.40072	0.80144	0.89553	TRUE	463	493	180	217
ABCC2_3481_CAGAATTCATCACAAACGCA	ABCC2	324.42	105.03	-1.6178	25879	4617.5	3.2285	0.0006212	0.99938	0.0012424	0.0096706	FALSE	233	249	309	363
ABCC2_3482_CAGGGTATAAATCTTAGTGG	ABCC2	94.051	73.524	-0.35099	211.46	887.9	0.68886	0.24485	0.75515	0.48971	0.67882	FALSE	172	204	80	85
ABCC2_3483_CATTATGGCAGGCCAACTTG	ABCC2	453.34	320.83	-0.49748	8845	7227.6	1.5587	0.059535	0.94046	0.11907	0.27912	FALSE	217	258	336	478
ABCC2_3484_GATTGGTATATCGAACAGCA	ABCC2	27.475	41.059	0.56269	93.175	175.81	1.0244	0.84421	0.15579	0.31158	0.51621	TRUE	30	34	3	5
ABCC3_22761_CCACGTACACGTACACCCAG	ABCC3	429.04	384.81	-0.15659	978.93	6713.1	0.53984	0.29465	0.70535	0.5893	0.75295	FALSE	175	115	254	326
ABCC3_22762_GCAGGGCGTACAGTCTTCGG	ABCC3	524.15	507.99	-0.045097	130.61	8780.2	0.17248	0.43153	0.56847	0.86306	0.93114	FALSE	504	600	444	545
ABCC3_22763_GGCCACATGAGAGTCCACCG	ABCC3	514.64	338.98	-0.60092	15595	8567.2	1.8978	0.028859	0.97114	0.057719	0.17239	FALSE	451	515	409	499
ABCC3_22764_TGAACCACCAGAAAAACAGG	ABCC3	34.873	75.434	1.0913	852.35	240.17	2.6173	0.99551	0.0044866	0.0089731	0.045674	TRUE	40	54	22	15
ABCC4_27541_AAGCACGGGTAAACCTTGCA	ABCC4	475.54	478.38	0.0085966	4.0557	7705.8	0.032444	0.51294	0.48706	0.97412	0.98755	TRUE	408	373	374	419
ABCC4_27542_CAGATTGACTATCTGGCCTG	ABCC4	195.5	296.01	0.59598	5104.8	2347.9	2.0743	0.98097	0.019028	0.038057	0.12961	TRUE	251	317	138	152
ABCC4_27543_GAAGGTACGATTCCTTAGTG	ABCC4	184.93	175.69	-0.073512	42.666	2180.3	0.19782	0.42157	0.57843	0.84315	0.91975	FALSE	197	179	132	149
ABCC4_27544_GCGTCACTGCCACGAACACG	ABCC4	407.9	221.53	-0.87778	17766	6273.8	2.353	0.0093104	0.99069	0.018621	0.077959	FALSE	313	300	321	411
ABCC5_26861_TACGGAAAGAGGCACCCATG	ABCC5	627.71	591.06	-0.086652	671.77	11184	0.34656	0.36446	0.63554	0.72892	0.84943	FALSE	492	504	415	461
ABCC5_26862_TGAAAAGGGCCATAATAACC	ABCC5	515.69	288.37	-0.8364	26376	8590.8	2.4526	0.0070908	0.99291	0.014182	0.064022	FALSE	307	164	489	555
ABCC5_26863_TGTTAAGACTAGAGAGACTG	ABCC5	319.14	269.27	-0.24429	1245.6	4517.2	0.74196	0.22905	0.77095	0.45811	0.65249	FALSE	459	516	217	321
ABCC5_26864_TTTATTCATAGAAATCCGCG	ABCC5	110.96	163.28	0.5532	1381.5	1105.5	1.5737	0.94219	0.057806	0.11561	0.27365	TRUE	80	129	60	82
ABCC6_1053_ACTATGATCCAATCAGCCTG	ABCC6	354.01	434.46	0.29468	3244.6	5189.5	1.1168	0.86795	0.13205	0.26409	0.46625	TRUE	315	342	192	306
ABCC6_1054_CAGACCACGATCCAGACGAG	ABCC6	173.31	232.03	0.41889	1733.4	1999.7	1.3132	0.90544	0.09456	0.18912	0.37792	TRUE	122	106	110	149
ABCC6_1055_GAGAACTGTGAGAGTCACAA	ABCC6	84.54	143.23	0.75369	1751.7	771.01	2.1136	0.98271	0.017294	0.034588	0.12142	TRUE	162	129	90	135
ABCC6_1056_GGACAGCATCCAATACGGCA	ABCC6	138.43	92.621	-0.57467	1059.9	1483	1.1896	0.11695	0.88305	0.2339	0.43199	FALSE	235	219	132	128
ABCC8_18509_CAGACCAACGAGATGCTCCG	ABCC8	229.31	78.298	-1.5382	12187	2904.6	2.8021	0.0025284	0.99747	0.0050568	0.029533	FALSE	145	186	138	194
ABCC8_18510_CTACCGTCAAAGCTCTAGTG	ABCC8	191.27	169.97	-0.16944	227.18	2280.5	0.44617	0.32772	0.67228	0.65544	0.80102	FALSE	203	113	111	138
ABCC8_18511_GATGTTGTGATAGTAGACCA	ABCC8	417.42	237.76	-0.80937	16453	6470.5	2.2334	0.012761	0.98724	0.025521	0.09784	FALSE	404	369	289	445
ABCC8_18512_TCAACGCCAGCGAATCAGTG	ABCC8	496.67	224.39	-1.1428	38492	8168.5	3.0126	0.001295	0.99871	0.00259	0.017403	FALSE	341	242	331	372
ABCC9_26873_AGAGAGGAAAACTCTCCGAC	ABCC9	159.57	316.06	0.98156	12595	1791.5	3.6972	0.99989	0.00010899	0.00021797	0.0022304	TRUE	144	182	91	105
ABCC9_26874_ATACACTATCGATGTTGTAG	ABCC9	410.02	585.33	0.51251	15488	6317.4	2.2057	0.9863	0.013704	0.027407	0.10295	TRUE	398	305	273	372
ABCC9_26875_GACTGCAAATCTGACCACCG	ABCC9	349.78	169.01	-1.045	16868	5106.8	2.5297	0.0057082	0.99429	0.011416	0.054597	FALSE	399	352	305	331
ABCC9_26876_TAAAGTACTGAATTGGCGCA	ABCC9	480.82	765.8	0.67035	41151	7820.8	3.2224	0.99936	0.00063553	0.0012711	0.0098472	TRUE	368	373	301	399
ABCD1_597_AGTTCCTCATGAAGTATGTG	ABCD1	313.85	354.25	0.17416	816.78	4417.5	0.60783	0.72835	0.27165	0.5433	0.72067	TRUE	308	345	127	165
ABCD1_598_CTACATGCACTCGCGTGTGG	ABCD1	507.24	516.58	0.026272	43.618	8402.4	0.10189	0.54058	0.45942	0.91884	0.96109	TRUE	590	479	367	428
ABCD1_599_GATCATGTCGTCGTACAAGG	ABCD1	327.59	396.27	0.27381	2363.4	4678	1.0041	0.84233	0.15767	0.31534	0.51997	TRUE	321	352	180	259
ABCD1_600_GGCCACATACACCGACAGGA	ABCD1	177.53	306.51	0.78444	8470.4	2064.9	2.8383	0.99773	0.0022678	0.0045355	0.027131	TRUE	258	191	90	79
ABCD2_637_ATTACCTCTCAGTGACACAT	ABCD2	218.75	333.25	0.60507	6627	2727.4	2.1924	0.98583	0.014174	0.028348	0.10545	TRUE	196	149	95	130
ABCD2_638_CCCTGACCAATCTCTTACGG	ABCD2	256.79	493.66	0.94025	28790	3378.3	4.0754	0.99998	2.2973e-05	4.5945e-05	0.00056801	TRUE	379	308	253	235
ABCD2_639_CCTTATTGCACTGTTGACGA	ABCD2	210.29	309.37	0.55477	4954	2587.7	1.9478	0.97428	0.025723	0.051445	0.15944	TRUE	178	165	94	158
ABCD2_640_CTGGAGCTGATGCTATTGAA	ABCD2	504.07	349.48	-0.52715	12049	8332.1	1.6936	0.045172	0.95483	0.090345	0.23252	FALSE	631	495	307	384
ABCD3_15573_AATTAAACTTACAAGAGGCA	ABCD3	99.334	102.17	0.040208	4.0207	954.59	0.091779	0.53626	0.46374	0.92748	0.96569	TRUE	68	79	47	50
ABCD3_15574_ACTCGACTTCGAAGACCCAT	ABCD3	246.22	359.98	0.54612	6528.6	3194	2.0129	0.97794	0.022062	0.044124	0.14342	TRUE	117	211	162	186
ABCD3_15575_TGGCAAATATGAGCGCACAA	ABCD3	103.56	74.479	-0.4702	425.74	1008.8	0.91564	0.17947	0.82053	0.35894	0.5622	FALSE	73	74	42	56
ABCD3_15576_TGTGTACTCTTGAGATGTCG	ABCD3	156.4	265.45	0.75945	6048.9	1744.3	2.6111	0.99549	0.0045128	0.0090256	0.04586	TRUE	128	201	101	102
ABCD4_15577_AGCCACATCTGAGAGCGTCG	ABCD4	208.18	124.13	-0.74129	3590.3	2553.1	1.6634	0.0481	0.9519	0.096201	0.24241	FALSE	204	153	178	195
ABCD4_15578_GATCCCCAGTCAGTACTATG	ABCD4	252.56	250.17	-0.01366	2.855	3304.3	0.04157	0.48342	0.51658	0.96684	0.98405	FALSE	232	209	160	170
ABCD4_15579_GTAGTAGACGAGGGTGAACG	ABCD4	460.74	333.25	-0.46618	8180.7	7386.1	1.4835	0.06897	0.93103	0.13794	0.30851	FALSE	458	462	295	393
ABCD4_15580_TTGCGATGACAACGTAACTC	ABCD4	862.31	399.13	-1.1094	111150	17136	3.5382	0.00020142	0.9998	0.00040283	0.0037704	FALSE	631	524	620	820
ABCE1_16225_AGTTGTCCTGTAGTTCGAAT	ABCE1	107.79	122.22	0.17974	104.27	1063.8	0.44254	0.67079	0.32921	0.65841	0.80314	TRUE	95	135	66	74
ABCE1_16226_CAATTGATAAGGCGCCAAAG	ABCE1	128.92	303.65	1.2295	15942	1349.2	4.7568	1	9.8369e-07	1.9674e-06	3.2238e-05	TRUE	146	194	98	81
ABCE1_16227_CCAAAACTTCACCTGGACGA	ABCE1	14.794	18.142	0.27735	5.6185	78.587	0.37765	0.62953	0.37047	0.74094	0.85722	TRUE	15	25	4	2
ABCE1_16228_TTTCAGATATATCATTGTGG	ABCE1	19.021	41.059	1.0709	251.53	108.88	2.112	0.98204	0.017957	0.035914	0.12456	TRUE	15	8	1	0
ABCF1_57_CTGCAGAGGCCAAAGCACGG	ABCF1	39.1	196.7	2.3017	14239	279.05	9.4345	1	1.9832e-21	3.9664e-21	2.2536e-19	TRUE	12	42	28	22
ABCF1_58_GATGGAGTATGAGCGCCAAG	ABCF1	179.65	272.13	0.59644	4322.7	2097.7	2.0193	0.97827	0.021726	0.043453	0.1419	TRUE	187	169	102	123
ABCF1_59_GCAACACATCAATGTTGGGA	ABCF1	95.107	160.42	0.74807	2168.6	901.14	2.1756	0.9852	0.014804	0.029608	0.10889	TRUE	82	97	44	45
ABCF1_60_TGTAATTGCCCCTATAGTAG	ABCF1	24.305	240.62	3.2553	29650	149.81	17.674	1	3.4351e-70	6.8702e-70	1.2316e-67	TRUE	12	28	4	18
ABCF2_26877_AACCAATGAGGCCATAACGA	ABCF2	476.59	456.42	-0.062254	203.45	7728.8	0.22944	0.40927	0.59073	0.81853	0.90523	FALSE	580	408	369	503
ABCF2_26878_ATGATCAGTACGTGAAGACG	ABCF2	375.15	181.42	-1.044	19369	5608.4	2.5868	0.0048435	0.99516	0.0096871	0.048336	FALSE	256	255	269	299
ABCF2_26879_CAGTCCATGCAAGATCCGCG	ABCF2	635.11	419.18	-0.59825	23561	11361	2.0257	0.021396	0.9786	0.042793	0.1405	FALSE	401	291	451	572
ABCF2_26880_GGGTCGTGAGCGATAAGGTG	ABCF2	226.14	333.25	0.5573	5788.9	2851.2	2.0058	0.97756	0.022439	0.044878	0.14508	TRUE	137	104	107	109
ABCF3_42323_ACTTCCAGGACTGCTAAAGA	ABCF3	344.5	202.43	-0.76415	10268	5003.8	2.0084	0.0223	0.9777	0.044599	0.14454	FALSE	349	375	297	329
ABCF3_42324_CAGCGGCTAGATGGTTACCG	ABCF3	566.42	555.73	-0.027436	57.125	9743.2	0.10829	0.45688	0.54312	0.91377	0.95844	FALSE	442	376	436	468
ABCF3_42325_GCAGAGTGTTGTACATGCGC	ABCF3	620.31	560.5	-0.14602	1789.7	11007	0.57006	0.28432	0.71568	0.56864	0.74009	FALSE	672	581	404	492
ABCF3_42326_TGCGAGAGGATTTGCTACGG	ABCF3	596.01	468.84	-0.34559	8115.1	10432	1.2451	0.10655	0.89345	0.21311	0.40773	FALSE	451	414	452	539
ABCG1_25381_ATGAAAGGGCTCGCTCAAGG	ABCG1	182.82	235.85	0.3657	1411.9	2147.2	1.1445	0.87378	0.12622	0.25243	0.45315	TRUE	117	167	112	137
ABCG1_25382_CTTCAGGAACCGAATAGGAA	ABCG1	119.41	242.53	1.0161	7812.2	1218.6	3.527	0.99979	0.00021025	0.00042049	0.0039092	TRUE	79	168	49	78
ABCG1_25383_GACCACAAGAGAGACCTCGG	ABCG1	328.65	494.62	0.5883	13916	4698.2	2.4214	0.99227	0.007731	0.015462	0.068266	TRUE	292	192	158	208
ABCG1_25384_GAGGCCGATCCCAATGTGCG	ABCG1	193.38	244.44	0.33648	1308	2314.1	1.0614	0.85574	0.14426	0.28852	0.49305	TRUE	162	201	150	165
ABCG2_24809_AAAAAACGAACGGATTAACA	ABCG2	632.99	537.59	-0.23529	4558.7	11311	0.89708	0.18484	0.81516	0.36968	0.57224	FALSE	838	710	569	657
ABCG2_24810_GAATTACATCAACTTTCCGG	ABCG2	134.21	150.87	0.16765	138.91	1423.1	0.44165	0.67057	0.32943	0.65887	0.80352	TRUE	72	89	54	61
ABCG2_24811_GGAAGGCTCTATGATCTCTG	ABCG2	358.24	585.33	0.70677	26170	5272.6	3.1274	0.99912	0.00088172	0.0017634	0.012795	TRUE	354	469	220	295
ABCG2_24812_TAACTTAGGATGTCTAAGCA	ABCG2	681.6	530.9	-0.35989	11400	12492	1.3483	0.088778	0.91122	0.17756	0.3625	FALSE	881	641	499	628
ABCG4_47459_CTCTGTGTCCCCAGTCATCG	ABCG4	825.32	942.45	0.19124	6866.8	16155	0.9215	0.82161	0.17839	0.35679	0.56031	TRUE	746	784	634	769
ABCG4_47460_GGTGGAGAGAACTACCTGGT	ABCG4	132.09	211.98	0.67827	3235	1393.4	2.1401	0.98382	0.016178	0.032357	0.11596	TRUE	183	134	88	99
ABCG4_47461_GTGGGACATGAACCGTAGGT	ABCG4	889.78	665.54	-0.41839	25275	17875	1.6773	0.046746	0.95325	0.093491	0.23771	FALSE	895	861	634	804
ABCG4_47462_TGGAGCTGTCCTATTCCGTG	ABCG4	850.68	636.89	-0.417	22972	16827	1.6481	0.049663	0.95034	0.099326	0.2477	FALSE	730	758	628	671
ABCG5_47583_ACACCTGAAAACGTTACCAA	ABCG5	45.44	175.69	1.9278	9381.3	339.94	7.0646	1	8.109e-13	1.6218e-12	5.2904e-11	TRUE	50	29	14	12
ABCG5_47584_GGCTCGCAGGAACCGAATTG	ABCG5	351.9	351.39	-0.0020814	0.12942	5148.1	0.0070909	0.49717	0.50283	0.99434	0.99729	FALSE	481	358	362	382
ABCG5_47585_GGTGCTATCCAGGACCGCGT	ABCG5	122.58	85.937	-0.50743	676.7	1261.8	1.0316	0.15088	0.84912	0.30176	0.50627	FALSE	251	266	120	181
ABCG5_47586_TGATTGGCAACTACAGCTTG	ABCG5	485.05	296.96	-0.70597	17952	7913.1	2.1144	0.017242	0.98276	0.034483	0.12117	FALSE	278	409	271	310
ABCG8_47587_CACCCCCATCTACTTAGGGG	ABCG8	998.63	685.59	-0.54194	49427	20877	2.1665	0.015136	0.98486	0.030273	0.11064	FALSE	1000	992	728	991
ABCG8_47588_CAGTGCGCTGACACCCGCGT	ABCG8	383.6	304.6	-0.33171	3130.8	5778.3	1.0393	0.14934	0.85066	0.29868	0.50325	FALSE	525	534	360	459
ABCG8_47589_CTCAAACCAAGGGACCTGAG	ABCG8	1055.7	738.11	-0.5157	50831	22499	2.1173	0.017117	0.98288	0.034235	0.12052	FALSE	1075	1126	772	942
ABCG8_47590_GAGTCCTACGAAGATGCCTG	ABCG8	464.97	469.79	0.014852	11.625	7477.1	0.055762	0.52223	0.47777	0.95553	0.97882	TRUE	438	531	357	380
ABHD1_54063_AGCCCCTAGTCCTTTATCAG	ABHD1	147.94	182.38	0.30004	594.45	1620	0.85551	0.80384	0.19616	0.39232	0.59344	TRUE	185	197	61	67
ABHD1_54064_GACCCTACCGTTCCACAAGT	ABHD1	473.42	185.24	-1.349	43726	7659.9	3.2927	0.00049612	0.9995	0.00099223	0.0080553	FALSE	387	556	473	560
ABHD1_54065_GCTGTCGTGTTTAACAACCG	ABHD1	520.98	252.08	-1.0444	37316	8709.1	2.8813	0.0019799	0.99802	0.0039598	0.024428	FALSE	335	309	465	525
ABHD1_54066_GGTGCAAGACGTATGTCTCC	ABHD1	529.43	537.59	0.022012	33.254	8899.2	0.086449	0.53445	0.46555	0.93111	0.96751	TRUE	245	271	517	559
ABHD10_42411_TAATTGATGACTTAGCTGAT	ABHD10	495.61	316.06	-0.64738	16322	8145.2	1.9895	0.023321	0.97668	0.046643	0.14904	FALSE	343	418	372	456
ABHD10_42412_TACCTCAGCGGGCGCCACGG	ABHD10	487.16	465.97	-0.064022	224.52	7959.4	0.23751	0.40613	0.59387	0.81226	0.90178	FALSE	422	316	382	375
ABHD10_42413_TCATATAAGAAAGATAGCCA	ABHD10	83.483	151.82	0.85512	2386.5	758.29	2.4817	0.99345	0.0065452	0.01309	0.060377	TRUE	63	86	36	48
ABHD10_42414_TGCACGACCAGAGAAGGTCG	ABHD10	134.21	350.43	1.3781	24672	1423.1	5.7317	1	4.9712e-09	9.9424e-09	2.2467e-07	TRUE	162	253	108	110
ABHD11_52127_ACGGTGGATGCTCGTAACCA	ABHD11	298	433.51	0.53922	9260.7	4121.7	2.1106	0.9826	0.017402	0.034805	0.12191	TRUE	376	548	222	325
ABHD11_52128_CTGCCACATAGGTTGCAAAG	ABHD11	380.43	370.49	-0.03811	49.442	5714.4	0.13154	0.44767	0.55233	0.89535	0.94865	FALSE	275	413	246	300
ABHD11_52129_GAGCCCGTGCAAAAAGACGA	ABHD11	188.1	562.41	1.575	75052	2230.2	7.926	1	1.1313e-15	2.2626e-15	9.1401e-14	TRUE	206	189	95	106
ABHD11_52130_GCTGTGGCCAACGACGACGC	ABHD11	434.32	770.57	0.82571	57677	6824.1	4.0704	0.99998	2.3466e-05	4.6932e-05	0.00057828	TRUE	427	288	291	406
ABHD12_34539_AGGTGACCACATGGTAACCA	ABHD12	235.65	193.84	-0.28052	876.47	3012.3	0.76194	0.22304	0.77696	0.44608	0.6414	FALSE	287	241	138	148
ABHD12_34540_CCTACGCCTGACGGGCCCGG	ABHD12	562.19	645.49	0.199	3473.2	9645.7	0.84811	0.80181	0.19819	0.39638	0.59699	TRUE	407	439	441	495
ABHD12_34541_GAGTGGCCCCAGATGTACAC	ABHD12	637.22	522.31	-0.28639	6618.5	11412	1.0757	0.14104	0.85896	0.28208	0.48601	FALSE	558	459	499	533
ABHD12_34542_GCAGGTACAGAATGATAGGG	ABHD12	285.32	174.74	-0.7042	6205.1	3889	1.7733	0.038091	0.96191	0.076182	0.20741	FALSE	383	364	275	275
ABHD12B_61421_CCAAGACAATAGCATCAACT	ABHD12B	98.278	153.73	0.64024	1556.7	941.15	1.8076	0.96464	0.035356	0.070713	0.19742	TRUE	71	63	47	55
ABHD12B_61422_GTCTTGTCTGTTGACTACAG	ABHD12B	225.09	332.29	0.5599	5800.4	2833.4	2.014	0.97799	0.022006	0.044011	0.14317	TRUE	168	161	123	146
ABHD12B_61423_TAATTGGGTTCCCATCACGA	ABHD12B	201.84	134.64	-0.5806	2281.1	2449.9	1.3577	0.087253	0.91275	0.17451	0.35846	FALSE	149	98	114	146
ABHD12B_61424_TTGTGTCTATGAGTGGACCA	ABHD12B	235.65	304.6	0.36886	2386.5	3012.3	1.2562	0.89548	0.10452	0.20905	0.40297	TRUE	190	202	136	173
ABHD13_54567_AATAGCCACTGCTCCACCCA	ABHD13	1075.8	987.32	-0.12365	3913	23077	0.58222	0.28021	0.71979	0.56042	0.73341	FALSE	1031	1148	678	833
ABHD13_54568_CATGGGAATGCAGGCAACAT	ABHD13	967.98	782.03	-0.3074	17338	20020	1.3142	0.094385	0.90561	0.18877	0.37744	FALSE	816	667	582	693
ABHD13_54569_GGGAACATAAAGACGTGAAG	ABHD13	313.85	303.65	-0.047553	52.114	4417.5	0.1536	0.43896	0.56104	0.87792	0.93884	FALSE	387	422	155	173
ABHD13_54570_TAGGATTTCAGCCATTATGG	ABHD13	589.67	488.89	-0.26989	5089.2	10284	0.99378	0.16017	0.83983	0.32033	0.52491	FALSE	586	528	353	452
ABHD14A_33935_AGGCCTTTAACTCTCACACG	ABHD14A	622.42	528.99	-0.23424	4372	11058	0.88851	0.18713	0.81287	0.37427	0.57662	FALSE	658	606	544	550
ABHD14A_33936_CTGGCAGCCCCACATACAGT	ABHD14A	559.02	733.33	0.39096	15262	9572.8	1.7816	0.96259	0.037408	0.074815	0.20501	TRUE	394	492	315	367
ABHD14A_33937_GGAGGTACAGAATGCCGTGT	ABHD14A	497.73	639.76	0.36152	10126	8191.8	1.5692	0.9417	0.058299	0.1166	0.27529	TRUE	580	601	368	405
ABHD14A_33938_TCCCACTCAACCAGGCACAC	ABHD14A	1232.2	1139.1	-0.11315	4328.1	27705	0.55886	0.28813	0.71187	0.57626	0.74384	FALSE	856	724	729	836
ABHD14B_54259_AGAACCTGGGTACACTGCAC	ABHD14B	991.23	759.11	-0.38446	27058	20669	1.6145	0.053208	0.94679	0.10642	0.25942	FALSE	783	904	728	855
ABHD14B_54260_GAGAGGCCCTGCCCGGCAGT	ABHD14B	703.79	994.01	0.49751	42424	13042	2.5413	0.99448	0.0055226	0.011045	0.053283	TRUE	819	703	516	638
ABHD14B_54261_TGATGGACTGATCACAACCG	ABHD14B	584.38	465.02	-0.329	7147.2	10160	1.1842	0.11817	0.88183	0.23633	0.4348	FALSE	482	568	414	494
ABHD14B_54262_TGCAGGTCTGGGGCACTCCA	ABHD14B	932.05	1133.4	0.28192	20323	19026	1.4599	0.92783	0.072165	0.14433	0.31774	TRUE	816	765	642	758
ABHD15_57701_CAAACAAGGCTGCACCCTCC	ABHD15	403.68	470.75	0.22124	2252.4	6186.9	0.85267	0.80308	0.19692	0.39384	0.59472	TRUE	258	263	334	387
ABHD15_57702_CTGGTGATCCCCAATGCGTG	ABHD15	252.56	141.32	-0.83321	6316	3304.3	1.9353	0.026474	0.97353	0.052948	0.16256	FALSE	176	159	264	278
ABHD15_57703_GGCCGGCCTCGAACCACTCT	ABHD15	209.24	117.45	-0.82776	4299	2570.4	1.8105	0.035095	0.9649	0.07019	0.19658	FALSE	178	197	152	184
ABHD15_57704_TGTATGTGACCGCCTCCTTG	ABHD15	462.86	498.44	0.10663	633.22	7431.6	0.41274	0.6601	0.3399	0.6798	0.81766	TRUE	474	451	254	349
ABHD16A_21085_ACCATGTTTGTGGACCGGCG	ABHD16A	458.63	566.23	0.30347	5805.2	7340.7	1.2559	0.89542	0.10458	0.20915	0.40311	TRUE	364	297	230	280
ABHD16A_21086_ATCTACGCCTGGTCCATCGG	ABHD16A	334.99	347.57	0.053029	79.132	4819.8	0.1812	0.57189	0.42811	0.85621	0.92728	TRUE	375	338	191	261
ABHD16A_21087_CCATCTTGGAAGCAACACAT	ABHD16A	466.03	247.31	-0.91137	24509	7499.9	2.5255	0.0057759	0.99422	0.011552	0.055102	FALSE	222	290	387	479
ABHD16A_21088_CTCAGGAAGGAGTCTCGAGG	ABHD16A	400.51	342.79	-0.22388	1667.9	6121.9	0.73762	0.23037	0.76963	0.46075	0.65468	FALSE	450	484	359	430
ABHD16B_60917_CAGACCAGCCGTAGACCACC	ABHD16B	343.44	183.33	-0.90195	13128	4983.3	2.2681	0.011661	0.98834	0.023322	0.091708	FALSE	270	170	209	272
ABHD16B_60918_CATCTGCTGCGAAGGCAACG	ABHD16B	296.95	136.54	-1.1151	13337	4102.2	2.5044	0.0061315	0.99387	0.012263	0.05751	FALSE	279	259	239	324
ABHD16B_60919_GCGCACGTCATCCCAGCGGA	ABHD16B	391	413.45	0.080371	252.22	5928	0.29168	0.61473	0.38527	0.77053	0.87572	TRUE	291	278	241	282
ABHD16B_60920_GGCCGCTGGCTCGTGTACCC	ABHD16B	257.85	351.39	0.44507	4401.1	3396.9	1.605	0.94575	0.054251	0.1085	0.26282	TRUE	362	330	159	216
ABHD17A_52039_ACCGTAGCCGGAGTAGTCGT	ABHD17A	99.334	115.54	0.21599	131.47	954.59	0.52445	0.69982	0.30018	0.60036	0.76157	TRUE	120	136	125	111
ABHD17A_52040_AGGCTCTCAGGGTCCCCAAG	ABHD17A	541.06	531.86	-0.024691	42.304	9162.3	0.096095	0.46172	0.53828	0.92344	0.96369	FALSE	596	599	447	636
ABHD17A_52041_GCGCGAGCTGGACACCATCG	ABHD17A	164.85	307.46	0.8952	10412	1870.9	3.2971	0.99951	0.00048845	0.00097691	0.0079475	TRUE	127	161	71	92
ABHD17A_52042_TACACGGTCCTCTTCTCGCA	ABHD17A	110.96	257.81	1.2089	11248	1105.5	4.4168	0.99999	5.0101e-06	1.002e-05	0.00014262	TRUE	62	56	80	67
ABHD17B_37815_CTTGGCTTGCTCTTAGGACA	ABHD17B	1196.2	862.24	-0.47188	56150	26622	2.047	0.020327	0.97967	0.040655	0.1357	FALSE	1167	1022	1090	1271
ABHD17B_37816_GAGTAAAGTGTATTTCGCAT	ABHD17B	482.93	630.21	0.3833	10893	7866.9	1.6604	0.95159	0.048414	0.096827	0.24347	TRUE	448	515	355	453
ABHD17B_37817_TATAGGGACAGTACCGTCTG	ABHD17B	1122.3	1129.6	0.009387	26.883	24429	0.046913	0.51871	0.48129	0.96258	0.98191	TRUE	713	870	666	835
ABHD17B_37818_TTCATGACTAGAACCAGTAA	ABHD17B	309.63	205.29	-0.59048	5499.6	4338.1	1.5841	0.056589	0.94341	0.11318	0.26985	FALSE	461	408	191	245
ABHD17C_46563_ACGCCGACATCGACGCCGCG	ABHD17C	571.7	489.84	-0.22252	3355.3	9865.3	0.82415	0.20493	0.79507	0.40986	0.60848	FALSE	424	424	408	507
ABHD17C_46564_GCCGTATCCCGAGTAGTCGT	ABHD17C	280.04	331.34	0.24188	1318.1	3793	0.83293	0.79756	0.20244	0.40489	0.60437	TRUE	206	225	193	210
ABHD17C_46565_GCGCGAGAAGAAGACCTCGA	ABHD17C	380.43	389.58	0.034212	41.894	5714.4	0.12109	0.54819	0.45181	0.90362	0.95341	TRUE	217	331	238	276
ABHD17C_46566_TCCCAATGCTCTGACCATAG	ABHD17C	598.12	631.16	0.077451	546.01	10482	0.32274	0.62655	0.37345	0.74689	0.86114	TRUE	580	504	444	599
ABHD2_29975_AGGTGACCTACCTGTGCGAG	ABHD2	332.88	347.57	0.062133	107.96	4779.2	0.21254	0.58416	0.41584	0.83169	0.91255	TRUE	333	385	217	315
ABHD2_29976_GCTCAGCCAAGGGCTCGAAG	ABHD2	128.92	160.42	0.31313	497.38	1349.2	0.8574	0.80434	0.19566	0.39131	0.59244	TRUE	151	134	98	150
ABHD2_29977_GGGCGTAGTCAACGAAAGTG	ABHD2	97.221	164.24	0.75043	2283.6	927.77	2.2002	0.98609	0.013908	0.027816	0.10401	TRUE	120	114	45	77
ABHD2_29978_TTTGCCCACAGGCTGCACGT	ABHD2	396.28	305.56	-0.37401	4132.9	6035.5	1.1678	0.12144	0.87856	0.24288	0.44252	FALSE	228	251	239	355
ABHD3_64313_ACTCCTTGCTTGTTCCCGTG	ABHD3	555.85	415.36	-0.41944	9920.2	9500	1.4414	0.074743	0.92526	0.14949	0.32508	FALSE	480	503	275	422
ABHD3_64314_GGGGGCTTCGAAGTGATGAA	ABHD3	169.08	153.73	-0.13644	117.84	1935	0.34889	0.36355	0.63645	0.72709	0.84821	FALSE	292	288	113	151
ABHD3_64315_GTCACTACTTCCAGACGCCA	ABHD3	235.65	114.58	-1.0339	7562	3012.3	2.2059	0.013685	0.98631	0.027371	0.10287	FALSE	135	86	154	190
ABHD3_64316_TAGTACGTTTCTGTAACCAC	ABHD3	232.48	258.77	0.15389	345.63	2958.3	0.48322	0.68553	0.31447	0.62895	0.78244	TRUE	225	228	99	129
ABHD4_47051_GACATCGATAGAGACATGGC	ABHD4	468.14	464.06	-0.012594	8.3136	7545.5	0.046942	0.48128	0.51872	0.96256	0.98191	FALSE	553	499	314	463
ABHD4_47052_GCTACTCGAAGAACAGCCAA	ABHD4	129.98	60.156	-1.0988	2525.7	1363.9	1.8907	0.029125	0.97088	0.058249	0.17345	FALSE	74	146	101	142
ABHD4_47053_GGAGGGATACATATCTGGCC	ABHD4	156.4	31.51	-2.2755	8923.8	1744.3	2.9903	0.0013034	0.9987	0.0026068	0.017493	FALSE	44	114	38	53
ABHD4_47054_GGGGTGCACGGATCTCACTG	ABHD4	318.08	377.17	0.24511	1748.9	4497.2	0.88111	0.81087	0.18913	0.37826	0.58048	TRUE	281	296	229	236
ABHD5_37795_GGTCGTTCAGGGAAACCCCA	ABHD5	292.72	151.82	-0.94258	10188	4024.3	2.221	0.013172	0.98683	0.026345	0.10014	FALSE	325	230	263	277
ABHD5_37796_GTGGAGATGTGCCCTAGGAT	ABHD5	60.235	113.63	0.90454	1460.6	492.7	2.4055	0.9919	0.0081028	0.016206	0.070626	TRUE	30	18	13	14
ABHD5_37797_TAAGGTGTGATATAGACGTA	ABHD5	73.972	126.04	0.76087	1379.3	646.2	2.0483	0.9797	0.020302	0.040603	0.13558	TRUE	127	96	44	35
ABHD5_37798_TTGGACGAAGTAGTAGACCC	ABHD5	438.55	477.43	0.12228	756.14	6913.3	0.4676	0.67997	0.32003	0.64007	0.7901	TRUE	439	429	355	437
ABHD6_45423_AGTCTTCATGGTGAACATAG	ABHD6	50.724	92.621	0.85601	897.23	392.87	2.1138	0.98264	0.017357	0.034715	0.12169	TRUE	32	15	20	24
ABHD6_45424_CAAGGATATGTGGCTCAGTG	ABHD6	1117	1033.2	-0.11244	3514.6	24275	0.53802	0.29528	0.70472	0.59057	0.75407	FALSE	878	896	745	905
ABHD6_45425_CTGACAATCAATTTGTACAA	ABHD6	154.29	192.88	0.32026	747.16	1713	0.93254	0.82446	0.17554	0.35109	0.55497	TRUE	277	239	100	142
ABHD6_45426_GCAAGTTAAGAGGATACACC	ABHD6	137.38	154.69	0.17004	149.95	1468	0.45179	0.67424	0.32576	0.65153	0.79816	TRUE	159	170	100	112
ABHD8_49299_GATGAAAAAGAGCACCACGT	ABHD8	257.85	90.712	-1.4969	14877	3396.9	2.8677	0.0020628	0.99794	0.0041257	0.025227	FALSE	374	202	184	201
ABHD8_49300_GCCGGGCTTGACCTCTACAA	ABHD8	320.19	350.43	0.1298	457.43	4537.2	0.44892	0.67326	0.32674	0.65349	0.79969	TRUE	287	168	202	230
ABHD8_49301_GTACCCAGACCTAGTGCACA	ABHD8	492.44	621.61	0.33545	8370.5	8075.4	1.4374	0.9247	0.075303	0.15061	0.32659	TRUE	516	446	340	402
ABHD8_49302_TCACCGTGTACCGCAATGGG	ABHD8	566.42	324.65	-0.80108	29783	9743.2	2.4493	0.0071566	0.99284	0.014313	0.064459	FALSE	383	313	337	450
ABI1_26705_GAGTTACCAGAACCTGACTC	ABI1	321.25	549.04	0.77136	26405	4557.3	3.3743	0.99963	0.00036997	0.00073994	0.0063073	TRUE	615	359	248	311
ABI1_26706_GTTGTGTCGAGATATCTGCC	ABI1	631.94	640.71	0.019865	38.505	11285	0.082606	0.53292	0.46708	0.93416	0.96889	TRUE	534	488	505	645
ABI1_26707_GTTTCCGAATATACCTTACA	ABI1	220.86	188.11	-0.23045	537.24	2762.6	0.62315	0.26658	0.73342	0.53317	0.71274	FALSE	193	188	167	204
ABI1_26708_TCGCCACCCACTATTGGACC	ABI1	653.07	625.43	-0.062285	381.95	11795	0.25447	0.39956	0.60044	0.79913	0.89408	FALSE	512	397	435	521
ABI2_27173_ACGAACTGGTCGTTCAAGGT	ABI2	307.51	121.27	-1.3353	18249	4298.5	2.8407	0.0022492	0.99775	0.0044985	0.026949	FALSE	177	276	204	227
ABI2_27174_CATACTCCCCCAACAATAGG	ABI2	81.37	63.976	-0.34221	151.82	732.99	0.64247	0.2593	0.7407	0.51861	0.70145	FALSE	172	153	33	60
ABI2_27175_TGCCTATCTGATAAACACCT	ABI2	101.45	35.33	-1.4957	2330.5	981.6	2.1103	0.016823	0.98318	0.033646	0.11912	FALSE	89	55	46	54
ABI2_27176_TTACCTGGAAAGACACTGGG	ABI2	100.39	110.76	0.14052	53.828	968.07	0.33338	0.63034	0.36966	0.73931	0.85619	TRUE	105	137	42	68
ABI3_38171_CCTGTCTCGAAAGAGCATCA	ABI3	543.17	358.07	-0.59978	17315	9210.3	1.9287	0.026885	0.97311	0.053771	0.16431	FALSE	336	402	400	487
ABI3_38172_CGGGCACACTCTGCGCATGT	ABI3	1632.7	1011.2	-0.69063	195860	40485	3.0887	0.0010051	0.99899	0.0020101	0.014191	FALSE	1170	1152	1149	1457
ABI3_38173_GCGATGACCTTCTGGCCGGG	ABI3	917.26	693.23	-0.40349	25217	18621	1.6417	0.050323	0.94968	0.10065	0.24984	FALSE	861	769	604	801
ABI3_38174_TCAGGCCACAGACAAGCGGA	ABI3	601.29	661.72	0.13794	1826.8	10557	0.58813	0.72178	0.27822	0.55644	0.7304	TRUE	438	500	330	367
ABI3BP_33995_GAGATATCAGATTCCTACAC	ABI3BP	64.462	167.1	1.3606	5554.6	538.81	4.4217	1	4.909e-06	9.8179e-06	0.00013994	TRUE	100	95	37	48
ABI3BP_33996_GGGATAGATGTAGTTTGCTG	ABI3BP	120.47	89.757	-0.42051	474.17	1233	0.87466	0.19064	0.80936	0.38127	0.58294	FALSE	185	159	93	103
ABI3BP_33997_TCCTCATAAACCATACCCTG	ABI3BP	177.53	228.21	0.36048	1289.2	2064.9	1.1152	0.86762	0.13238	0.26476	0.46701	TRUE	145	157	129	177
ABI3BP_33998_TCTAATGCACTAGACGTAGT	ABI3BP	292.72	342.79	0.22711	1255.7	4024.3	0.78937	0.78505	0.21495	0.4299	0.62677	TRUE	250	256	203	196
ABL1_65_CTTAGGCTATAATCACAATG	ABL1	300.12	231.08	-0.37572	2393.4	4160.8	1.0703	0.14224	0.85776	0.28447	0.48854	FALSE	347	387	196	244
ABL1_66_GGTTCATCATCATTCAACGG	ABL1	161.68	318.92	0.97567	12712	1823.1	3.6826	0.99988	0.00011544	0.00023088	0.0023446	TRUE	268	242	138	143
ABL1_67_TCAGTGATGATATAGAACGG	ABL1	305.4	406.77	0.41234	5164.2	4259.1	1.5533	0.93982	0.060177	0.12035	0.28113	TRUE	265	293	165	187
ABL1_68_TTGCTCCCTCGAAAAGAGCG	ABL1	1438.2	896.61	-0.68114	148700	34123	2.932	0.0016837	0.99832	0.0033673	0.021429	FALSE	1088	1124	1076	1414
ABL2_73_AACCTCTGTAATGACGACGG	ABL2	240.94	404.86	0.74634	13659	3102.8	2.9428	0.99837	0.0016263	0.0032526	0.020885	TRUE	259	298	183	226
ABL2_74_GGTTCAACATCACAACCATA	ABL2	172.25	47.743	-1.8296	8495.2	1983.5	2.7956	0.0025351	0.99746	0.0050701	0.0296	FALSE	259	324	147	205
ABL2_75_TATCGAATGGAACAGCCTGA	ABL2	283.21	449.74	0.66534	14050	3850.5	2.6837	0.99636	0.0036406	0.0072812	0.038925	TRUE	181	171	202	238
ABL2_76_TGTACACCATCACTCCACAG	ABL2	456.52	183.33	-1.3115	39189	7295.4	3.1984	0.00069102	0.99931	0.001382	0.010527	FALSE	270	221	348	432
ABLIM1_10657_TAAGCAATCTACGAAGACCG	ABLIM1	189.16	256.86	0.43937	2304.9	2247	1.4282	0.92338	0.076621	0.15324	0.33001	TRUE	181	241	84	84
ABLIM1_10658_TCTAACTCCAACTTACGCTC	ABLIM1	441.72	227.26	-0.95574	23620	6980.3	2.5669	0.0051298	0.99487	0.01026	0.050477	FALSE	314	298	335	428
ABLIM1_10659_TCTTTCGGACTGGACGACAT	ABLIM1	506.18	527.08	0.058259	218.43	8378.9	0.22833	0.5903	0.4097	0.81939	0.90564	TRUE	417	359	309	359
ABLIM1_10660_TGTTACATACACGCCCACGT	ABLIM1	246.22	137.5	-0.83593	6033.8	3194	1.9238	0.027185	0.97282	0.05437	0.16554	FALSE	142	119	120	166
ABLIM2_53627_AGGTCGGAGTGTAGCGCCCG	ABLIM2	202.9	299.83	0.5611	4742.2	2467.1	1.9515	0.9745	0.025499	0.050998	0.15848	TRUE	202	239	117	158
ABLIM2_53628_CTTACATAAATCACACGGCT	ABLIM2	86.653	106.94	0.30041	206.43	796.63	0.71891	0.76365	0.23635	0.4727	0.66467	TRUE	112	88	49	67
ABLIM2_53629_GCTGTGAGAAATACATCACG	ABLIM2	109.9	103.12	-0.090969	22.969	1091.5	0.20512	0.41848	0.58152	0.83696	0.91582	FALSE	104	138	68	86
ABLIM2_53630_GTGAGTAGGAGATCATGTCG	ABLIM2	104.62	173.78	0.72672	2430	1022.5	2.1631	0.98472	0.015277	0.030553	0.11134	TRUE	80	103	71	71
ABLIM3_31115_AGGTCACCTTGTCTCCAATG	ABLIM3	691.11	542.36	-0.3491	11104	12727	1.3186	0.093658	0.90634	0.18732	0.37564	FALSE	521	573	404	478
ABLIM3_31116_CAAGGTTAAGTCTATCTACG	ABLIM3	417.42	496.53	0.24984	3135.2	6470.5	0.98349	0.83732	0.16268	0.32537	0.5301	TRUE	404	354	221	251
ABLIM3_31117_GGAAGTGGTTGTTGTGCACG	ABLIM3	935.22	966.32	0.047139	483.51	19114	0.22492	0.58898	0.41102	0.82204	0.90718	TRUE	1030	915	574	624
ABLIM3_31118_TGGGGGAGTCTATGTACCCC	ABLIM3	652.01	451.65	-0.52872	20241	11769	1.8469	0.032381	0.96762	0.064761	0.186	FALSE	605	490	510	609
ABO_77_AGCCAAAGGTGCTGACACCG	ABO	269.47	382.9	0.50525	6482.3	3603	1.8897	0.9706	0.0294	0.058801	0.1745	TRUE	132	137	167	135
ABO_78_ATGGAGTTCCGCGACCACGT	ABO	649.9	417.27	-0.63799	27387	11718	2.149	0.015819	0.98418	0.031638	0.11418	FALSE	481	481	408	503
ABO_79_CCGGTCCCCAGCGTCACGCG	ABO	168.02	199.57	0.24686	498.39	1918.9	0.72006	0.76424	0.23576	0.47152	0.66358	TRUE	226	125	109	133
ABO_80_TGATCAGTGACTTCTGCGAG	ABO	540	711.37	0.397	14754	9138.3	1.7927	0.96349	0.03651	0.073021	0.20188	TRUE	710	556	370	454
ABR_81_CAAGAGTGAAATCCAGAAGG	ABR	290.61	312.24	0.10325	234.08	3985.5	0.34267	0.63408	0.36592	0.73184	0.85119	TRUE	290	288	145	202
ABR_82_CTGCAGTGACAACGCCCAAG	ABR	127.87	347.57	1.4356	25581	1334.5	6.0142	1	9.043e-10	1.8086e-09	4.4435e-08	TRUE	123	98	37	79
ABR_83_GAGGCTTGACACTCACGTGT	ABR	192.33	337.07	0.80625	10678	2297.3	3.0198	0.99874	0.0012649	0.0025298	0.017092	TRUE	191	228	149	191
ABR_84_TACTGTCCTCGGACTACGAG	ABR	194.44	224.39	0.2057	449.09	2331	0.62034	0.73248	0.26752	0.53505	0.714	TRUE	220	197	110	187
ABRA_60493_CCTCAGCCACAGGTACGAGA	ABRA	175.42	117.45	-0.57477	1697.2	2032.2	1.286	0.09918	0.90082	0.19836	0.38982	FALSE	119	128	162	213
ABRA_60494_CCTGGTGTCTGAGCTAACCA	ABRA	378.32	359.98	-0.071472	168.09	5671.9	0.24344	0.40383	0.59617	0.80767	0.89914	FALSE	369	391	306	370
ABRA_60495_GAAAGAGGTGTCCAAAACGG	ABRA	507.24	413.45	-0.29429	4409.3	8402.4	1.0231	0.15312	0.84688	0.30625	0.51045	FALSE	578	600	363	416
ABRA_60496_GAATGCATTCACTTACTGGG	ABRA	648.84	523.26	-0.3098	7908	11693	1.1614	0.12275	0.87725	0.2455	0.44539	FALSE	644	452	422	509
ABRACL_46675_AAAGTTAAGCGTGAAATTTG	ABRACL	623.48	379.08	-0.71636	30323	11083	2.3215	0.010129	0.98987	0.020258	0.082669	FALSE	526	569	374	489
ABRACL_46676_AGCAATGAATGTGGATCACG	ABRACL	261.02	470.75	0.84835	22464	3452.8	3.5692	0.99982	0.00017902	0.00035805	0.0034135	TRUE	183	202	133	181
ABRACL_46677_CGAGGTTAACCTCTTAGTGG	ABRACL	237.77	304.6	0.35603	2241.8	3048.4	1.2105	0.88695	0.11305	0.22611	0.42277	TRUE	189	269	180	235
ABRACL_46678_GGTTGGCACATTTATCATCA	ABRACL	255.73	232.99	-0.13385	258.86	3359.8	0.39244	0.34736	0.65264	0.69472	0.82728	FALSE	404	327	198	255
ABT1_36603_AAAAAAGCGGTCCTACACCA	ABT1	87.71	200.52	1.1838	6627.1	809.51	3.9649	0.99996	3.6744e-05	7.3487e-05	0.0008603	TRUE	77	95	35	38
ABT1_36604_AGAACAGACACTAGATGCGG	ABT1	67.632	122.22	0.84431	1522.1	574.06	2.2784	0.98862	0.011378	0.022756	0.09007	TRUE	39	48	26	25
ABT1_36605_GACGCGTCCGACCTCGCCAT	ABT1	9.5107	17.187	0.79108	30.092	44.441	1.1516	0.86486	0.13514	0.27027	0.47304	TRUE	5	3	3	1
ABT1_36606_GTTCCAAAGATCATAACGGA	ABT1	29.589	139.41	2.1986	6849.7	193.69	7.8909	1	1.5256e-15	3.0513e-15	1.2186e-13	TRUE	58	57	18	13
ABTB1_51135_CGCACTTACTCGGAGCTCGG	ABTB1	177.53	148	-0.26085	436.92	2064.9	0.64986	0.25786	0.74214	0.51571	0.69895	FALSE	132	149	144	155
ABTB1_51136_CTACAAAGACCACGTCACTG	ABTB1	342.39	393.4	0.19983	1302.9	4962.8	0.72417	0.76552	0.23448	0.46896	0.66134	TRUE	365	344	277	320
ABTB1_51137_GGGCTCGGAAGTAGTCACTG	ABTB1	44.383	114.58	1.3487	2597.1	329.59	3.8668	0.99994	5.5545e-05	0.00011109	0.0012393	TRUE	84	105	25	19
ABTB1_51138_TGTAATCGCGTAGAGCCCGG	ABTB1	181.76	98.351	-0.87936	3559.2	2130.7	1.807	0.03534	0.96466	0.07068	0.19737	FALSE	177	194	147	137
ABTB2_33875_AGGGGCTGAAGTATGCGGGG	ABTB2	293.78	325.61	0.14794	506.95	4043.7	0.50057	0.69166	0.30834	0.61668	0.77355	TRUE	233	236	126	136
ABTB2_33876_CCTCATCAACCAAGCCATCG	ABTB2	435.38	421.09	-0.048024	102.07	6846.4	0.17267	0.43146	0.56854	0.86291	0.93107	FALSE	489	460	245	333
ABTB2_33877_GAGGGCTCGGCAGTGAACGG	ABTB2	417.42	389.58	-0.099308	387.45	6470.5	0.34601	0.36467	0.63533	0.72934	0.84966	FALSE	335	294	322	401
ABTB2_33878_TGTTCAAGGTCATTCTCGGG	ABTB2	1009.2	714.23	-0.49814	43824	21175	2.027	0.021332	0.97867	0.042665	0.1402	FALSE	633	616	771	976
ACAA1_85_AGCGCGAAGTAATATTTCCA	ACAA1	76.086	55.382	-0.45124	215.67	670.72	0.79944	0.21071	0.78929	0.42143	0.61875	FALSE	41	45	58	55
ACAA1_86_CTGCCGAGAGAAGCTCGTCG	ACAA1	294.83	162.33	-0.85703	8971.4	4063.2	2.0788	0.018818	0.98118	0.037636	0.12857	FALSE	328	301	225	306
ACAA1_87_GCCCTTGTCATCATGGACCG	ACAA1	274.75	148	-0.88804	8221.9	3697.7	2.0844	0.018557	0.98144	0.037115	0.12739	FALSE	316	365	205	272
ACAA1_88_TCAATAGACAGTGTTCGTCG	ACAA1	275.81	256.86	-0.10233	179.68	3716.7	0.3109	0.37794	0.62206	0.75587	0.86694	FALSE	329	295	274	360
ACAA2_28113_TACCTGACATCCATTCACAA	ACAA2	30.646	113.63	1.8569	3786.5	202.79	5.8272	1	2.8625e-09	5.7249e-09	1.3354e-07	TRUE	25	26	6	10
ACAA2_28114_TAGCAGTGAAGTCTTTCAGA	ACAA2	317.02	317.01	-5.0041e-05	6.0839e-05	4477.2	0.00016485	0.49993	0.50007	0.99987	0.9999	FALSE	346	310	187	223
ACAA2_28115_TGTTACTGCAGGGAATGCAT	ACAA2	100.39	111.72	0.15279	64.202	968.07	0.36407	0.64187	0.35813	0.71626	0.84149	TRUE	100	113	51	84
ACAA2_28116_TTTCTGTAACTGTTCCAGGG	ACAA2	158.51	194.79	0.29565	659.83	1775.7	0.86093	0.80535	0.19465	0.38931	0.5905	TRUE	260	183	54	66
ACACA_89_AATGCATGCGGTCTATCCGT	ACACA	269.47	546.18	1.0165	39453	3603	4.6099	1	2.0143e-06	4.0286e-06	6.1986e-05	TRUE	334	365	175	202
ACACA_90_CCAGAGTCCCACATTCCCTG	ACACA	307.51	462.15	0.58615	12080	4298.5	2.3586	0.99083	0.0091716	0.018343	0.077163	TRUE	302	328	210	223
ACACA_91_TATTTGCCTAGGTACCGAAG	ACACA	231.43	321.79	0.4738	4110	2940.4	1.6664	0.95218	0.04782	0.09564	0.24154	TRUE	219	229	105	142
ACACA_92_TGATGGGTCCATGATAACCG	ACACA	43.327	97.396	1.1504	1519.9	319.32	3.0258	0.99875	0.0012495	0.002499	0.016911	TRUE	76	86	14	21
ACACB_93_AAAGCGTGTGACAAACTCAG	ACACB	146.89	108.85	-0.42892	727.33	1604.6	0.94948	0.17109	0.82891	0.34217	0.54651	FALSE	149	146	107	110
ACACB_94_ACAACGACATCGACACCGGG	ACACB	464.97	437.33	-0.088231	382.17	7477.1	0.31969	0.3746	0.6254	0.74921	0.86279	FALSE	420	418	282	304
ACACB_95_GAACTCGAATATGGCCAGCG	ACACB	150.06	243.49	0.69467	4427.9	1650.8	2.2995	0.98926	0.010739	0.021478	0.086264	TRUE	141	148	97	117
ACACB_96_GTCGGAGTCCATAATCCACA	ACACB	165.91	250.17	0.58962	3587.3	1886.9	1.9399	0.9738	0.0262	0.0524	0.16146	TRUE	122	197	85	94
ACAD10_51251_AGCTCGATACTGCTTAACCC	ACAD10	47.554	83.073	0.79206	642.88	360.88	1.8697	0.96905	0.030951	0.061903	0.18065	TRUE	192	111	18	32
ACAD10_51252_ATCGCTTGTAGACTCCCTGT	ACAD10	149	105.03	-0.50044	973.88	1635.4	1.0872	0.13837	0.86163	0.27675	0.48011	FALSE	86	78	72	65
ACAD10_51253_CCAGCTCATACCTCAAGGGG	ACAD10	79.256	145.14	0.86465	2219.1	707.92	2.4762	0.99335	0.0066498	0.0133	0.061106	TRUE	92	82	39	59
ACAD10_51254_TCCAACTTACTACATCAGGC	ACAD10	258.9	318.92	0.29975	1806.1	3415.5	1.027	0.84779	0.15221	0.30442	0.50872	TRUE	361	368	195	295
ACAD11_52951_CCACTCCGATAGCTGTTGCA	ACAD11	244.11	412.5	0.75446	14419	3157.4	2.9968	0.99864	0.0013643	0.0027286	0.018149	TRUE	267	183	155	184
ACAD11_52952_CCTTGGCCAAAAGTAGAACA	ACAD11	197.61	160.42	-0.29916	693.63	2381.8	0.76215	0.22297	0.77703	0.44593	0.64129	FALSE	156	130	155	146
ACAD11_52953_CTGAGCCAATGTTTCTACCG	ACAD11	225.09	154.69	-0.53823	2499.7	2833.4	1.3226	0.092978	0.90702	0.18596	0.37392	FALSE	205	192	127	152
ACAD11_52954_TTGTTTGTACAGACTCGGAA	ACAD11	140.55	86.892	-0.68748	1460	1513.2	1.3793	0.083759	0.91624	0.16752	0.3492	FALSE	171	175	79	174
ACAD8_35443_CAAGGCTTCAAAAATGACAG	ACAD8	206.07	238.71	0.21123	533.7	2518.6	0.65057	0.74233	0.25767	0.51534	0.69859	TRUE	312	306	164	164
ACAD8_35444_GCTTCGGAAATGAGGAACAG	ACAD8	420.59	544.27	0.37114	7680.6	6536.5	1.5298	0.93697	0.063029	0.12606	0.29026	TRUE	508	383	201	332
ACAD8_35445_TCAGTCCTCTCACGGCAATG	ACAD8	1630.6	850.78	-0.9377	311930	40414	3.8789	5.247e-05	0.99995	0.00010494	0.0011782	FALSE	1450	1448	1160	1476
ACAD8_35446_TCGAAGATCACAGCTCGTGT	ACAD8	641.45	898.52	0.48558	33278	11514	2.3958	0.99171	0.0082921	0.016584	0.071827	TRUE	663	652	354	452
ACAD9_36271_CACCATGTACTCAAGACTAG	ACAD9	480.82	460.24	-0.06297	211.75	7820.8	0.23269	0.408	0.592	0.816	0.90378	FALSE	437	392	310	408
ACAD9_36272_CTTGCCTAAACTGGCGTCCG	ACAD9	592.84	677	0.19121	3545.3	10358	0.82693	0.79586	0.20414	0.40828	0.60751	TRUE	695	544	375	508
ACAD9_36273_GAAGATAAATTAGGCATTCG	ACAD9	476.59	440.19	-0.11438	662.85	7728.8	0.41408	0.33941	0.66059	0.67882	0.817	FALSE	514	517	336	422
ACAD9_36274_GGACTCCCGAAAAATTGACC	ACAD9	182.82	331.34	0.85437	11269	2147.2	3.2051	0.99933	0.00067499	0.00135	0.010326	TRUE	172	209	172	195
ACADL_100_TAAAATGGGATTAAAAGCCC	ACADL	187.04	161.37	-0.21178	330	2213.6	0.54567	0.29262	0.70738	0.58524	0.75031	FALSE	171	132	125	145
ACADL_97_CAGAAAAAGGCTAATACCAT	ACADL	38.043	223.44	2.5232	20150	269.2	11.3	1	6.6616e-30	1.3323e-29	1.0485e-27	TRUE	37	19	14	19
ACADL_98_CTCCTCCCAGACAATAGCTG	ACADL	202.9	224.39	0.14461	231.19	2467.1	0.43279	0.66741	0.33259	0.66518	0.80756	TRUE	200	158	117	146
ACADL_99_GCCACTTACTCTGAGTGATG	ACADL	161.68	148.96	-0.1175	80.989	1823.1	0.29801	0.3828	0.6172	0.7656	0.87287	FALSE	113	158	74	98
ACADM_101_AAGATGTGGATAACCAACGG	ACADM	139.49	278.82	0.99402	9991.1	1498.1	3.5997	0.99984	0.00015929	0.00031858	0.0030866	TRUE	143	119	75	95
ACADM_102_AATTGGCTTATGGATGTACA	ACADM	427.98	294.1	-0.53973	9041.1	6690.9	1.6368	0.050837	0.94916	0.10167	0.25159	FALSE	325	302	300	385
ACADM_103_ATTGTGGAAGCAGATACCCC	ACADM	116.24	173.78	0.57608	1672.1	1175.9	1.6781	0.95332	0.046684	0.093368	0.23749	TRUE	76	143	138	149
ACADM_104_GTATTTGGGGAGAATGACTG	ACADM	250.45	335.16	0.41886	3606.5	3267.4	1.4819	0.93082	0.069185	0.13837	0.30905	TRUE	349	351	178	209
ACADS_105_ACACACCATCTACCAGTCTG	ACADS	1380.1	927.17	-0.57337	103590	32278	2.5211	0.0058492	0.99415	0.011698	0.055613	FALSE	1150	999	778	928
ACADS_106_GACACTCATGATGACTCCGG	ACADS	239.88	251.13	0.065831	63.248	3084.6	0.20249	0.58023	0.41977	0.83954	0.91742	TRUE	238	305	128	174
ACADS_107_GGCAGGTACCTGGTTCGCTG	ACADS	421.64	365.71	-0.20479	1566.1	6558.5	0.69064	0.24489	0.75511	0.48979	0.67885	FALSE	413	429	350	424
ACADS_108_TAAGGAACATCTCTTCCCAG	ACADS	369.86	148.96	-1.3063	25617	5502.9	2.9779	0.0014509	0.99855	0.0029019	0.019072	FALSE	272	233	226	323
ACADSB_109_AGCCAAAGTTGATGCATCTG	ACADSB	112.02	258.77	1.2007	11226	1119.5	4.3861	0.99999	5.7725e-06	1.1545e-05	0.00016226	TRUE	132	108	53	61
ACADSB_110_ATGGAGAAATCAGTAATACA	ACADSB	104.62	196.7	0.90446	4343.4	1022.5	2.8797	0.99801	0.0019911	0.0039822	0.024542	TRUE	117	169	101	107
ACADSB_111_ATTGAGTAGAGCTTCTGACT	ACADSB	246.22	317.01	0.36328	2515.7	3194	1.2526	0.89482	0.10518	0.21035	0.40446	TRUE	167	214	153	199
ACADSB_112_TTCGAATGTTAACGGGCAGG	ACADSB	504.07	396.27	-0.34637	5831.6	8332.1	1.181	0.1188	0.8812	0.2376	0.43641	FALSE	278	307	277	405
ACADVL_113_CACTAATCGTACCCAGTTTG	ACADVL	323.36	259.72	-0.31511	2031.3	4597.4	0.93863	0.17396	0.82604	0.34792	0.55211	FALSE	228	253	205	269
ACADVL_114_GTCTAACCGAGCCCTCAAGC	ACADVL	38.043	106.94	1.4672	2524.9	269.2	4.1995	0.99999	1.3516e-05	2.7031e-05	0.00035182	TRUE	14	16	10	11
ACADVL_115_GTGGAGGAGACCACTTGGCA	ACADVL	92.994	156.6	0.7456	2056.6	874.71	2.1505	0.98423	0.01577	0.031539	0.11389	TRUE	104	61	33	43
ACADVL_116_TCCTGGTCAGAGCGTCAGAG	ACADVL	184.93	126.04	-0.54947	1749.8	2180.3	1.2612	0.10359	0.89641	0.20718	0.40061	FALSE	94	94	73	104
ACAN_493_CAGCGGTCACCTGCACGACG	ACAN	319.14	177.6	-0.84193	10228	4517.2	2.1058	0.017608	0.98239	0.035216	0.12296	FALSE	324	466	252	287
ACAN_494_CCTGCGCTCCAATGACTCTG	ACAN	140.55	161.37	0.19801	217.07	1513.2	0.53532	0.70374	0.29626	0.59252	0.75561	TRUE	121	168	83	106
ACAN_495_GAACCAGCCTATACCCCAGT	ACAN	314.91	528.99	0.74645	23296	4437.4	3.2138	0.99935	0.000655	0.00131	0.010084	TRUE	364	291	172	246
ACAN_496_GAGGGCAGTTCACCAACCGT	ACAN	73.972	133.68	0.84511	1820.9	646.2	2.3488	0.99057	0.0094339	0.018868	0.078691	TRUE	118	93	21	46
ACAP1_25821_AGGTCTGCGGGGTTTCCGAG	ACAP1	392.05	467.88	0.2545	2880.5	5949.4	0.98308	0.83722	0.16278	0.32557	0.53034	TRUE	457	461	267	339
ACAP1_25822_CAGAACCAAGCTTAAGAGAG	ACAP1	198.67	140.36	-0.49819	1712.4	2398.8	1.1904	0.11692	0.88308	0.23383	0.43191	FALSE	112	161	91	104
ACAP1_25823_GTCACAAATGCCGACAACGA	ACAP1	117.3	240.62	1.0303	7844.5	1190.1	3.5749	0.99982	0.00017523	0.00035046	0.0033497	TRUE	75	84	77	78
ACAP1_25824_TGCCGGAACACTGAATGCAG	ACAP1	362.46	255.9	-0.50059	5720.5	5356.1	1.4561	0.072687	0.92731	0.14537	0.31917	FALSE	349	375	260	376
ACAP2_33055_ACTATAGGATAATCCGACTG	ACAP2	400.51	365.71	-0.13078	605.7	6121.9	0.44472	0.32826	0.67174	0.65652	0.80175	FALSE	408	445	238	340
ACAP2_33056_ATATATCAGAGCAAAATATG	ACAP2	95.107	142.27	0.57606	1123.5	901.14	1.5712	0.94189	0.058109	0.11622	0.2747	TRUE	102	84	43	44
ACAP2_33057_TCCGGAGCACTCGATACACA	ACAP2	435.38	688.45	0.65987	32440	6846.4	3.0586	0.99889	0.001112	0.002224	0.015401	TRUE	429	348	309	354
ACAP2_33058_TGAACTTGGACCCTACATGA	ACAP2	626.65	275.95	-1.1803	64008	11159	3.3199	0.00045027	0.99955	0.00090053	0.0074384	FALSE	386	435	492	593
ACAP3_57857_CCTCGCTATAGCAACTGTCA	ACAP3	500.9	391.49	-0.35473	6007.5	8261.8	1.2037	0.11436	0.88564	0.22872	0.42584	FALSE	594	547	410	442
ACAP3_57858_CTCCACTTTGGACTCATCGT	ACAP3	413.19	611.11	0.5635	19773	6382.9	2.4773	0.99338	0.0066184	0.013237	0.060893	TRUE	389	395	292	360
ACAP3_57859_CTGGATCAAGGACAAATACG	ACAP3	421.64	495.57	0.23257	2737.2	6558.5	0.91289	0.81935	0.18065	0.3613	0.5646	TRUE	447	465	239	370
ACAP3_57860_GTTCGCTGACAGCCTACAGG	ACAP3	606.57	841.23	0.47116	27715	10681	2.2705	0.98841	0.011589	0.023177	0.091287	TRUE	609	672	418	533
ACAT1_117_CTGCCTAAAAAAGATCCAAT	ACAT1	45.44	108.85	1.2421	2103.3	339.94	3.4394	0.99971	0.00029353	0.00058706	0.0051987	TRUE	44	94	22	48
ACAT1_118_GAAGTGAAAGAAGCATACAT	ACAT1	135.26	41.059	-1.6959	4808.2	1438	2.4842	0.0063126	0.99369	0.012625	0.058778	FALSE	103	73	107	104
ACAT1_119_GAGGATCAACACCATATGGT	ACAT1	317.02	517.53	0.7053	20401	4477.2	2.9966	0.99863	0.001365	0.00273	0.018157	TRUE	371	308	146	156
ACAT1_120_TTCTGCGCAGGATGTGATGG	ACAT1	311.74	518.49	0.73213	21714	4377.7	3.1248	0.99911	0.00088973	0.0017795	0.01289	TRUE	262	263	176	245
ACAT2_121_CCTGTTAGACAAGCCAGTGT	ACAT2	206.07	228.21	0.14659	245.37	2518.6	0.44127	0.67049	0.32951	0.65903	0.80359	TRUE	173	118	174	197
ACAT2_122_GCAGTCCAGTCAATAGGGAT	ACAT2	218.75	127	-0.77974	4285.8	2727.4	1.7568	0.039459	0.96054	0.078917	0.21259	FALSE	237	88	106	111
ACAT2_123_GTTCTCAAGTAAGCCAAGTG	ACAT2	266.3	232.99	-0.19204	555.56	3546.5	0.55942	0.28793	0.71207	0.57587	0.74354	FALSE	322	281	196	278
ACAT2_124_TCTATGTTGCTCCCATGGCG	ACAT2	222.97	332.29	0.57345	6034.1	2797.9	2.0667	0.98062	0.019383	0.038767	0.13129	TRUE	167	112	131	168
ACBD3_47931_AAGAGAACGTCTGCAAAAGG	ACBD3	719.65	574.83	-0.32366	10519	13438	1.2493	0.10578	0.89422	0.21156	0.40599	FALSE	506	504	589	605
ACBD3_47932_ACATCAAAGAATCCAACCTC	ACBD3	207.12	143.23	-0.52907	2058.4	2535.8	1.2688	0.10224	0.89776	0.20447	0.39727	FALSE	221	215	133	139
ACBD3_47933_GGGCCGCGACCGGATCCAGG	ACBD3	407.9	380.99	-0.098234	362.33	6273.8	0.33981	0.367	0.633	0.734	0.85258	FALSE	575	433	342	350
ACBD3_47934_TGCGTCCCACAAAATAGAGA	ACBD3	104.62	161.37	0.62044	1629.2	1022.5	1.7749	0.96202	0.037981	0.075962	0.20703	TRUE	77	90	18	26
ACBD4_49907_ACCACTTATATCGTCCAATG	ACBD4	314.91	439.24	0.47876	7781.5	4437.4	1.8664	0.969	0.030996	0.061992	0.18087	TRUE	212	256	162	229
ACBD4_49908_AGGTGATCCCTGACATGCCG	ACBD4	508.3	393.4	-0.36884	6627.3	8425.9	1.2517	0.10535	0.89465	0.21069	0.4049	FALSE	586	552	377	441
ACBD4_49909_CAGGGAATCACAGAAAACCT	ACBD4	406.85	341.84	-0.2505	2117	6252	0.82216	0.20549	0.79451	0.41098	0.60947	FALSE	454	286	265	308
ACBD4_49910_GTGATCGACACAGTGCCCCT	ACBD4	382.54	445.92	0.22063	2011.2	5757	0.83528	0.79822	0.20178	0.40356	0.60353	TRUE	528	414	198	298
ACBD5_55853_ACTGGGTGATATGACCAAAG	ACBD5	427.98	421.09	-0.023359	23.736	6690.9	0.08423	0.46644	0.53356	0.93287	0.96848	FALSE	489	429	254	363
ACBD5_55854_AGCCCATTGATGAAAACTTG	ACBD5	767.2	810.68	0.079423	945.29	14645	0.35927	0.6403	0.3597	0.7194	0.84362	TRUE	822	934	598	635
ACBD5_55855_AGGTAAAATAGTCCAACCTG	ACBD5	317.02	262.59	-0.27086	1485	4477.2	0.81357	0.20794	0.79206	0.41589	0.6138	FALSE	394	351	285	299
ACBD5_55856_TGGTCATTCCAGTCAACCCA	ACBD5	883.44	727.6	-0.27963	12171	17704	1.1712	0.12075	0.87925	0.24151	0.44101	FALSE	699	647	682	759
ACBD6_53475_AAATATATTTGATTACTGCA	ACBD6	225.09	136.54	-0.71698	3980.4	2833.4	1.6634	0.048104	0.9519	0.096209	0.24243	FALSE	351	242	130	118
ACBD6_53476_AGCCATCAAATCGAAAAATG	ACBD6	862.31	868.92	0.011014	21.885	17136	0.050539	0.52015	0.47985	0.95969	0.98091	TRUE	781	821	472	675
ACBD6_53477_CCTCGATCTCAGGGCTATGG	ACBD6	939.45	672.22	-0.48227	35954	19230	1.9271	0.026986	0.97301	0.053973	0.16472	FALSE	782	652	644	818
ACBD6_53478_TTAAAAAACTAGATCCAGGT	ACBD6	379.37	513.71	0.43636	9075.5	5693.2	1.7805	0.9625	0.0375	0.074999	0.20537	TRUE	381	507	244	316
ACBD7_72745_ACAGGGCTGCAGAAGATGTG	ACBD7	751.35	700.87	-0.1002	1274.5	14240	0.42304	0.33613	0.66387	0.67227	0.81247	FALSE	760	508	524	599
ACBD7_72746_CTGAAAGCAAGACCAGATGA	ACBD7	564.3	660.76	0.22729	4659.4	9694.4	0.97968	0.83638	0.16362	0.32724	0.53215	TRUE	500	441	246	279
ACBD7_72747_GAGAACTGAAAGAACTCTAT	ACBD7	86.653	288.37	1.723	22075	796.63	7.1468	1	4.4473e-13	8.8946e-13	2.955e-11	TRUE	147	165	29	38
ACBD7_72748_GCAAAGCCAAATGGGAAGCA	ACBD7	531.54	275.95	-0.94325	33524	8946.8	2.7021	0.0034447	0.99656	0.0068894	0.037335	FALSE	375	362	418	459
ACCS_54015_CCCAACAGACTTCTCAAACA	ACCS	128.92	244.44	0.91773	6840.2	1349.2	3.145	0.99917	0.0008305	0.001661	0.012196	TRUE	109	91	82	86
ACCS_54016_GGGGAGTATACATCACCCAG	ACCS	516.75	562.41	0.12194	1043	8614.4	0.49198	0.68863	0.31137	0.62273	0.7778	TRUE	401	418	416	479
ACCS_54017_TAGGTGGTTGTCCTGAATGG	ACCS	593.89	571.96	-0.054192	240.52	10383	0.21524	0.41479	0.58521	0.82958	0.91136	FALSE	638	412	446	480
ACCS_54018_TGTGATAGCGCCATAGTAAG	ACCS	1052.5	675.09	-0.63994	72099	22408	2.5214	0.0058443	0.99416	0.011689	0.055584	FALSE	711	712	717	1062
ACCSL_71621_AAGTGACATGAACTGCATTG	ACCSL	602.35	343.75	-0.80744	34085	10582	2.5139	0.0059703	0.99403	0.011941	0.056411	FALSE	496	392	406	577
ACCSL_71622_GATCAACCTCCTACAGTCTG	ACCSL	494.56	358.07	-0.46478	9374.6	8121.9	1.5145	0.064954	0.93505	0.12991	0.29653	FALSE	474	345	313	369
ACCSL_71623_TCCCACGGATGGATAGGTCG	ACCSL	339.22	319.88	-0.084427	187.02	4901.4	0.27622	0.39119	0.60881	0.78238	0.88311	FALSE	272	217	182	229
ACCSL_71624_TCTTAGGGGAAAAAGGTCCG	ACCSL	361.41	407.73	0.17352	1073.6	5335.2	0.63412	0.737	0.263	0.52601	0.70727	TRUE	423	528	228	278
ACD_48371_AAGCAGCGTGGCCCCGACGT	ACD	481.88	700.87	0.53954	24187	7843.9	2.4726	0.99329	0.0067062	0.013412	0.061507	TRUE	397	504	269	353
ACD_48372_AGATGCACAGCATTGAGCTG	ACD	695.34	776.3	0.15868	3279.8	12832	0.71471	0.76261	0.23739	0.47479	0.66636	TRUE	506	352	436	517
ACD_48373_ATCCGCTGGGTGTAGCCGTG	ACD	559.02	456.42	-0.29195	5276.6	9572.8	1.0486	0.14718	0.85282	0.29436	0.49877	FALSE	528	519	388	456
ACD_48374_GCTTCTGGATGAAATGCGGG	ACD	434.32	295.05	-0.55624	9788.3	6824.1	1.6859	0.045904	0.9541	0.091808	0.23494	FALSE	418	462	360	385
ACE_4581_GGAAAACATCTACGACATGG	ACE	249.39	265.45	0.089678	128.97	3249	0.28173	0.61092	0.38908	0.77816	0.8805	TRUE	440	279	138	203
ACE_4582_GGTGTGGAACGAGTATGCCG	ACE	84.54	132.73	0.64461	1175.5	771.01	1.7353	0.95861	0.041388	0.082776	0.21953	TRUE	114	98	65	74
ACE_4583_GTTGTAGAAGTCCCAAGCCG	ACE	259.96	412.5	0.66406	11788	3434.1	2.603	0.99538	0.0046207	0.0092414	0.046699	TRUE	267	340	210	205
ACE_4584_GTTTCGTTTCGGGTAACAGG	ACE	227.2	242.53	0.093821	117.59	2868.9	0.28627	0.61266	0.38734	0.77468	0.87832	TRUE	309	191	184	190
ACE2_46731_AACATCTTCATGCCTATGTG	ACE2	418.47	584.37	0.48078	13857	6492.5	2.0589	0.98025	0.01975	0.039499	0.133	TRUE	297	302	251	277
ACE2_46732_CAGGATCCTTATGTGCACAA	ACE2	251.51	74.479	-1.7422	17033	3285.8	3.0883	0.0010008	0.999	0.0020016	0.014146	FALSE	165	104	169	222
ACE2_46733_CCAAAGGCGAGAGATAGTTG	ACE2	300.12	279.77	-0.10091	206.97	4160.8	0.31537	0.37624	0.62376	0.75248	0.86484	FALSE	451	368	199	240
ACE2_46734_TGCACAGAGAATATTCAAGG	ACE2	81.37	103.12	0.33813	237.47	732.99	0.80355	0.78889	0.21111	0.42222	0.61937	TRUE	94	144	54	44
ACER1_58989_CCCAGACAACGTAAATGTAG	ACER1	194.44	347.57	0.83471	11968	2331	3.1716	0.99924	0.00075796	0.0015159	0.011324	TRUE	247	156	136	184
ACER1_58990_GAAGACCAGGCGGATGAACT	ACER1	142.66	119.36	-0.25534	272.07	1543.5	0.59315	0.27644	0.72356	0.55287	0.72789	FALSE	140	133	130	152
ACER1_58991_GGTGGCCGAGTTCTACAACA	ACER1	17.965	27.691	0.59728	47.844	101.09	0.96738	0.82692	0.17308	0.34616	0.55034	TRUE	27	46	3	7
ACER1_58992_TGGACGAGATCGCCATCCTG	ACER1	169.08	274.04	0.69346	5588.3	1935	2.3862	0.99149	0.0085127	0.017025	0.073243	TRUE	213	142	104	98
ACER2_69181_ATACCTTCTGGGGAACCACA	ACER2	75.029	89.757	0.25545	108.67	658.43	0.57396	0.71651	0.28349	0.56698	0.73894	TRUE	41	60	26	30
ACER2_69182_ATTCAGGGGTAGGTTCAAGG	ACER2	209.24	160.42	-0.38122	1196.9	2570.4	0.96293	0.16778	0.83222	0.33555	0.53999	FALSE	89	202	110	169
ACER2_69183_CATCTGACCCAAGAAACTAA	ACER2	174.36	198.61	0.18684	294.28	2015.9	0.54004	0.7054	0.2946	0.5892	0.75285	TRUE	215	228	80	113
ACER2_69184_TATCGCCGAGTTCTACAACA	ACER2	337.1	333.25	-0.016551	7.4369	4860.6	0.055318	0.47794	0.52206	0.95588	0.97899	FALSE	462	343	339	423
ACER3_42351_AAAAGAGCCGATATTCCATC	ACER3	394.17	234.9	-0.74431	12894	5992.4	2.0575	0.019819	0.98018	0.039639	0.13333	FALSE	332	250	359	375
ACER3_42352_CTCGGCGATGTACCAGGTCA	ACER3	233.54	200.52	-0.21892	545.98	2976.3	0.60527	0.27249	0.72751	0.54499	0.72149	FALSE	103	157	103	112
ACER3_42353_TAAGCCATGGATAAACCCTG	ACER3	135.26	246.35	0.86017	6306.9	1438	2.9295	0.9983	0.001698	0.003396	0.021565	TRUE	100	118	65	70
ACER3_42354_TATTAAACTGAATAGAACTA	ACER3	34.873	34.375	-0.020158	0.12387	240.17	0.032117	0.48085	0.51915	0.96169	0.98159	FALSE	57	52	9	17
ACHE_133_GGTGTCCATGAACTACCGGG	ACHE	174.36	283.59	0.69855	6052.9	2015.9	2.4328	0.99251	0.0074921	0.014984	0.066724	TRUE	132	120	122	121
ACHE_134_TATGTGGACACCCTATACCC	ACHE	178.59	161.37	-0.14541	148.34	2081.3	0.37744	0.35289	0.64711	0.70579	0.83469	FALSE	127	114	85	123
ACHE_135_TGGTGGGAATGACACAGAGC	ACHE	101.45	159.46	0.64734	1704.1	981.6	1.8517	0.96794	0.032056	0.064112	0.18478	TRUE	79	72	69	77
ACHE_136_TGTCCTCGTCTGGATCTATG	ACHE	196.56	384.81	0.96563	18210	2364.8	3.8712	0.99995	5.4157e-05	0.00010831	0.0012123	TRUE	186	240	125	153
ACIN1_31375_CCTGGTCAAGCGGCTCAAAG	ACIN1	306.46	259.72	-0.23787	1094	4278.8	0.71447	0.23747	0.76253	0.47494	0.6664	FALSE	294	281	178	216
ACIN1_31376_CGTACTCATGCCAACCCTCG	ACIN1	358.24	237.76	-0.58938	7333.1	5272.6	1.6592	0.04854	0.95146	0.097079	0.24398	FALSE	282	330	239	296
ACIN1_31377_GAGGAATTAGCACTGGCCAA	ACIN1	270.53	392.45	0.53507	7496.1	3621.9	2.0259	0.97861	0.02139	0.04278	0.14047	TRUE	365	387	207	278
ACIN1_31378_TGAGGGACAAAAATCTAGGG	ACIN1	331.82	402.95	0.27944	2535.8	4758.9	1.0311	0.84876	0.15124	0.30248	0.50703	TRUE	295	345	235	247
ACKR1_6677_AGCTAGGATACCCAGGACAC	ACKR1	164.85	148.96	-0.14534	126.4	1870.9	0.36747	0.35659	0.64341	0.71318	0.83938	FALSE	133	89	159	185
ACKR1_6678_CAATGGCAACAAGACAAAGA	ACKR1	147.94	87.847	-0.74538	1836.1	1620	1.4931	0.067589	0.93241	0.13518	0.30445	FALSE	57	45	111	83
ACKR1_6679_CTGCACCCTGATATACAGCA	ACKR1	35.929	64.93	0.83617	429.56	249.76	1.8351	0.96637	0.033634	0.067267	0.19087	TRUE	17	24	20	33
ACKR1_6680_GAAGGAATCATTCACACCAT	ACKR1	243.05	379.08	0.63911	9364.9	3139.2	2.4278	0.99241	0.0075948	0.01519	0.067379	TRUE	227	157	164	235
ACKR2_3469_ATCTCAACCATCCGCCTGCG	ACKR2	751.35	601.56	-0.32029	11253	14240	1.2552	0.1047	0.8953	0.20939	0.40346	FALSE	600	498	410	590
ACKR2_3470_CAGCCCATACTATGGTAGCA	ACKR2	715.42	608.25	-0.23378	5752.5	13332	0.92819	0.17666	0.82334	0.35331	0.55715	FALSE	723	804	399	513
ACKR2_3471_CATGCCCGCCGAAATCTGCG	ACKR2	867.59	592.97	-0.54829	38048	17278	2.0893	0.018342	0.98166	0.036685	0.12639	FALSE	648	622	642	691
ACKR2_3472_GGAGTGGAAGGAGAAACCCT	ACKR2	194.44	260.68	0.42105	2205.3	2331	1.3719	0.91495	0.085052	0.1701	0.35282	TRUE	173	216	102	101
ACKR3_44835_AAGACAGCGATAATGGAGAA	ACKR3	546.34	465.97	-0.2291	3234.6	9282.5	0.83415	0.2021	0.7979	0.40419	0.60384	FALSE	807	693	310	437
ACKR3_44836_CCAACAATGAGACCTACTGC	ACKR3	496.67	175.69	-1.4939	54837	8168.5	3.5514	0.00019155	0.99981	0.0003831	0.0036104	FALSE	367	391	380	484
ACKR3_44837_GCACTGCTACATCTTGAACC	ACKR3	194.44	222.48	0.19342	393.58	2331	0.58079	0.7193	0.2807	0.5614	0.73427	TRUE	109	124	80	90
ACKR3_44838_GGTCCACGCTCATGCACGTG	ACKR3	1375.9	863.19	-0.67198	133200	32145	2.8596	0.002121	0.99788	0.004242	0.025759	FALSE	1070	1065	996	1340
ACKR4_39015_AGTCCCCAGCCAATCAGGAG	ACKR4	1323	951.04	-0.47586	69664	30492	2.1304	0.01657	0.98343	0.03314	0.11777	FALSE	896	841	1014	1242
ACKR4_39016_ATTGATGTTCCTAGGTAGCG	ACKR4	1081.1	953.9	-0.18034	8091.3	23229	0.83424	0.20207	0.79793	0.40414	0.6038	FALSE	1100	880	631	858
ACKR4_39017_CAATGACGAAAACTATTGTG	ACKR4	694.28	796.35	0.19762	5215.2	12806	0.90198	0.81647	0.18353	0.36707	0.56993	TRUE	630	548	417	527
ACKR4_39018_TGTGCTACTTTATCACAGCA	ACKR4	505.13	619.7	0.29441	6581.2	8355.5	1.2535	0.89498	0.10502	0.21003	0.40408	TRUE	377	321	304	381
ACLY_137_AGAGCAATTCGAGATTACCA	ACLY	30.646	55.382	0.83322	312.51	202.79	1.737	0.95815	0.041847	0.083695	0.22125	TRUE	21	8	25	20
ACLY_138_CGGTCACCTGTACACGACAG	ACLY	166.97	171.87	0.041556	12.047	1902.9	0.11252	0.54477	0.45523	0.91047	0.95693	TRUE	154	194	110	126
ACLY_139_GACCAGCTGATCAAACGTCG	ACLY	262.07	377.17	0.52357	6678.1	3471.5	1.9535	0.97462	0.025383	0.050766	0.15803	TRUE	315	183	173	209
ACLY_140_GCCAGCGGGAGCACATCGGT	ACLY	10.567	8.5937	-0.26991	1.9529	50.893	0.27667	0.3457	0.6543	0.6914	0.82516	FALSE	65	8	0	1
ACMSD_59757_AGTGGTGCGAGAGAATTGCT	ACMSD	117.3	141.32	0.26669	289.11	1190.1	0.69629	0.75679	0.24321	0.48641	0.67574	TRUE	40	14	24	33
ACMSD_59758_CCTCCTGGGGTAGCTCACAA	ACMSD	574.87	435.42	-0.40004	9770.6	9938.8	1.3988	0.080931	0.91907	0.16186	0.34198	FALSE	770	709	375	434
ACMSD_59759_CGAGTGGGACCTGAACGCGC	ACMSD	162.74	289.32	0.82626	8175	1839	2.9518	0.99842	0.0015799	0.0031598	0.020415	TRUE	142	105	91	94
ACMSD_59760_CTGCAGAGGTTTGGCTACGG	ACMSD	75.029	51.562	-0.53252	277.74	658.43	0.91453	0.1788	0.8212	0.3576	0.56109	FALSE	57	78	34	33
ACO1_141_CCTGCCCCTAACATCACAGA	ACO1	80.313	274.04	1.7581	20425	720.43	7.2178	1	2.6451e-13	5.2902e-13	1.7859e-11	TRUE	93	52	21	22
ACO1_142_CTTGGTGTCTAGGTTTGACG	ACO1	158.51	199.57	0.33041	845.48	1775.7	0.97423	0.83502	0.16498	0.32997	0.5347	TRUE	148	187	86	107
ACO1_143_TTATTACCCAGACAGCCTCG	ACO1	253.62	261.63	0.044697	32.098	3322.7	0.13899	0.55527	0.44473	0.88946	0.94528	TRUE	200	222	159	217
ACO1_144_TTGCATATGCTATTACTAAG	ACO1	159.57	145.14	-0.13586	104.18	1791.5	0.34093	0.36653	0.63347	0.73305	0.85193	FALSE	99	126	90	144
ACO2_149_ATCTTCTCCGAGAGTGTCAG	ACO2	1203.6	1122.9	-0.10006	3258.9	26844	0.49268	0.31112	0.68888	0.62224	0.77738	FALSE	875	920	842	894
ACO2_150_GTCTCAATAGGACATCAACC	ACO2	415.3	697.05	0.74569	40348	6426.7	3.5145	0.99978	0.00022029	0.00044058	0.0040661	TRUE	288	408	275	317
ACO2_151_GTGCAGCTACCAATTAGACC	ACO2	287.44	323.7	0.17085	658.04	3927.5	0.57862	0.71858	0.28142	0.56285	0.73564	TRUE	265	264	200	254
ACO2_152_TCTCGGGGTTTGCGTCGTTG	ACO2	19.021	21.962	0.19769	4.3282	108.88	0.28179	0.59719	0.40281	0.80562	0.89789	TRUE	14	11	11	20
ACOT1_73650_ACAATGCCAGGAAAGGGCCC	ACOT1	724.93	453.56	-0.67536	37322	13571	2.3295	0.0099166	0.99008	0.019833	0.081434	FALSE	614	575	446	545
ACOT1_73651_AGCCCGAGAAACCCTTGGTG	ACOT1	146.89	288.37	0.9684	10287	1604.6	3.5319	0.99979	0.00020632	0.00041264	0.0038496	TRUE	134	128	49	78
ACOT1_73652_CTACTTGCTCAGTCATCCTG	ACOT1	227.2	175.69	-0.36905	1331.9	2868.9	0.96162	0.16811	0.83189	0.33622	0.54056	FALSE	197	154	151	193
ACOT1_73653_GGGGGAACCTTACGCTACAA	ACOT1	63.405	63.021	-0.0086309	0.073786	527.19	0.016731	0.49186	0.50814	0.98373	0.99208	FALSE	73	44	29	41
ACOT11_34379_AGCTGAAGCAGATCACGCCG	ACOT11	525.2	516.58	-0.023842	37.194	8804	0.091919	0.46338	0.53662	0.92676	0.96528	FALSE	495	448	339	461
ACOT11_34380_ATCTGCGTCCAGGACCACAA	ACOT11	881.33	579.6	-0.60377	46016	17647	2.2713	0.011563	0.98844	0.023126	0.091154	FALSE	772	642	511	626
ACOT11_34381_GCCAACTGCGCCATTCAGGG	ACOT11	611.86	702.78	0.19957	4138.1	10807	0.87461	0.80911	0.19089	0.38179	0.58342	TRUE	617	613	413	529
ACOT11_34382_GGGATACCGGAACCCCACGG	ACOT11	424.81	423	-0.0061452	1.6379	6624.6	0.022237	0.49113	0.50887	0.98226	0.99145	FALSE	381	444	327	369
ACOT12_60277_AGCATTCAGCACAAGCATGG	ACOT12	225.09	70.66	-1.6576	12869	2833.4	2.9012	0.0018472	0.99815	0.0036943	0.023068	FALSE	128	91	161	174
ACOT12_60278_CCACCCCATGCAAACCATCA	ACOT12	277.92	305.56	0.13627	381.93	3754.8	0.45091	0.67397	0.32603	0.65205	0.79852	TRUE	151	141	81	82
ACOT12_60279_GATGATTTCAGACGCTATCG	ACOT12	357.18	288.37	-0.30778	2374.4	5251.8	0.94955	0.17117	0.82883	0.34234	0.5467	FALSE	341	235	276	307
ACOT12_60280_GTAGATATGTTTAAGTTCCG	ACOT12	142.66	224.39	0.64977	3382.4	1543.5	2.0803	0.98125	0.01875	0.037501	0.12824	TRUE	196	146	69	82
ACOT13_43587_ACGTGGCTGTCAAACCGCCG	ACOT13	92.994	155.64	0.73683	1994.5	874.71	2.1183	0.98291	0.017091	0.034182	0.12038	TRUE	62	77	47	56
ACOT13_43588_AGTAGATAACATATCAACAA	ACOT13	87.71	67.795	-0.36679	199.12	809.51	0.69995	0.2412	0.7588	0.4824	0.67274	FALSE	57	42	70	83
ACOT13_43589_GGTGATAAAGGCCATGACCA	ACOT13	292.72	208.16	-0.48983	3601	4024.3	1.333	0.09127	0.90873	0.18254	0.36923	FALSE	245	289	239	233
ACOT13_43590_GTTCATATCGACACTGACTC	ACOT13	419.53	406.77	-0.044449	81.398	6514.5	0.15808	0.4372	0.5628	0.8744	0.93689	FALSE	230	318	291	340
ACOT2_29699_AGATCATTAGGGTTCCTGCT	ACOT2	863.36	666.49	-0.37289	19460	17165	1.5027	0.066462	0.93354	0.13292	0.30116	FALSE	816	764	626	753
ACOT2_29700_CTACTTGCTCAGTCATCCCG	ACOT2	592.84	611.11	0.043728	166.99	10358	0.17956	0.57125	0.42875	0.8575	0.92799	TRUE	549	553	389	502
ACOT2_29701_GCTCGCCAAGAGTGTCGGCG	ACOT2	745.01	615.88	-0.27419	8355.2	14078	1.0882	0.13824	0.86176	0.27648	0.47983	FALSE	781	774	605	770
ACOT2_29702_GGTACAGCCGGGACGCTCGA	ACOT2	928.88	731.42	-0.34437	19564	18939	1.4348	0.075671	0.92433	0.15134	0.32752	FALSE	864	734	823	945
ACOT4_58565_ATAATAAGCTAGAGCCAACG	ACOT4	175.42	101.22	-0.78741	2804.5	2032.2	1.6461	0.049828	0.95017	0.099656	0.24826	FALSE	149	141	105	146
ACOT4_58566_ATGTCAATGATCCCTGGGAA	ACOT4	369.86	308.42	-0.26132	1891.5	5502.9	0.82827	0.20376	0.79624	0.40752	0.6068	FALSE	500	358	298	361
ACOT4_58567_CAGTTTCCATCAATGGATCT	ACOT4	982.78	892.79	-0.13839	4050.7	20433	0.6295	0.26451	0.73549	0.52902	0.70988	FALSE	638	708	625	796
ACOT4_58568_TCGCGGGACTCGAGCCCATG	ACOT4	379.37	273.09	-0.47276	5686	5693.2	1.4086	0.079477	0.92052	0.15895	0.338	FALSE	394	454	243	244
ACOT6_73654_ACAGGCATTGATAAGTACAG	ACOT6	424.81	414.41	-0.035686	54.12	6624.6	0.12782	0.44914	0.55086	0.89829	0.9504	FALSE	570	537	250	318
ACOT6_73655_ATCATATCCTTGTAATGTAG	ACOT6	500.9	277.86	-0.84783	25404	8261.8	2.4538	0.0070684	0.99293	0.014137	0.063868	FALSE	496	564	350	408
ACOT6_73656_CTGAAAGGCTACAAGCTCAT	ACOT6	495.61	592.97	0.25826	4748.3	8145.2	1.0787	0.85964	0.14036	0.28072	0.48452	TRUE	382	332	281	387
ACOT6_73657_TTGGCATGGATGATCAAAGC	ACOT6	480.82	521.35	0.11653	821.8	7820.8	0.45833	0.67664	0.32336	0.64671	0.7947	TRUE	292	311	329	438
ACOT7_30783_AGCGCATGGAGACCAAGTGG	ACOT7	392.05	455.47	0.21579	2013.5	5949.4	0.82215	0.7945	0.2055	0.41099	0.60947	TRUE	348	387	304	379
ACOT7_30784_CAGGGGCACATACCACAGGG	ACOT7	332.88	167.1	-0.98999	14140	4779.2	2.398	0.0082425	0.99176	0.016485	0.071529	FALSE	318	308	232	293
ACOT7_30785_GCGGCCAGATGATGCCAACG	ACOT7	120.47	114.58	-0.07166	17.326	1233	0.16763	0.43327	0.56673	0.86653	0.9329	FALSE	182	131	137	166
ACOT7_30786_GTCTCCCATGTGCATCGGTG	ACOT7	193.38	278.82	0.52558	3679.8	2314.1	1.776	0.96213	0.037869	0.075738	0.20672	TRUE	137	138	88	85
ACOT8_26701_ATTACTGGGTACCGGCCAAG	ACOT8	336.05	423	0.33113	3793.2	4840.2	1.2499	0.89433	0.10567	0.21134	0.40574	TRUE	319	240	233	307
ACOT8_26702_CCTTAAATACTGGTCAATGA	ACOT8	107.79	119.36	0.1458	66.966	1063.8	0.35471	0.63843	0.36157	0.72315	0.84583	TRUE	93	122	91	110
ACOT8_26703_TCGTGACCAAGACGCTACGG	ACOT8	140.55	188.11	0.41792	1136.9	1513.2	1.2226	0.88925	0.11075	0.2215	0.41739	TRUE	108	212	120	108
ACOT8_26704_TTACTGGCTTGATCTCAATG	ACOT8	341.33	462.15	0.4361	7340.7	4942.3	1.7186	0.95716	0.04284	0.08568	0.22475	TRUE	239	199	208	221
ACOT9_33275_AAGAGGAGCTCTTTAGACAA	ACOT9	579.1	587.24	0.020105	33.136	10037	0.081257	0.53238	0.46762	0.93524	0.96949	TRUE	677	790	464	479
ACOT9_33276_CTTACCAATCTTATCCACCA	ACOT9	207.12	401.04	0.94991	19306	2535.8	3.8509	0.99994	5.8851e-05	0.0001177	0.0013023	TRUE	207	217	131	167
ACOT9_33277_GAGAAACATCTCATGTATGG	ACOT9	640.39	680.81	0.08818	817.3	11489	0.37716	0.64697	0.35303	0.70606	0.8349	TRUE	792	754	461	608
ACOT9_33278_TCTTCCCGACCCAGCTAACA	ACOT9	908.8	589.15	-0.62448	51685	18391	2.3571	0.0092086	0.99079	0.018417	0.077417	FALSE	531	632	741	796
ACOX1_153_ACCTATCACCGGATTAACGA	ACOX1	179.65	234.9	0.38497	1533	2097.7	1.2063	0.88614	0.11386	0.22772	0.42467	TRUE	249	179	112	165
ACOX1_154_CTGTGGTTTCCAAGCCTCGA	ACOX1	363.52	685.59	0.91344	53147	5377	4.3922	0.99999	5.6114e-06	1.1223e-05	0.00015809	TRUE	352	313	253	309
ACOX1_155_GCGCCGCCGAGAGATCGGTG	ACOX1	179.65	197.66	0.1371	162.25	2097.7	0.3932	0.6529	0.3471	0.6942	0.82688	TRUE	348	302	124	157
ACOX1_156_TGGCATTGAAGCATGTCGGA	ACOX1	336.05	215.8	-0.63659	7317.6	4840.2	1.7284	0.041957	0.95804	0.083914	0.22161	FALSE	497	430	227	313
ACOX2_21553_GACCATCTTCTAACCAACCC	ACOX2	272.64	244.44	-0.15689	397.83	3659.7	0.4661	0.32057	0.67943	0.64114	0.79059	FALSE	247	204	227	293
ACOX2_21554_GCATAACTGATGGCCAGCTG	ACOX2	551.62	684.63	0.31115	8871.8	9403.2	1.3717	0.91492	0.085082	0.17016	0.35288	TRUE	609	676	438	596
ACOX2_21555_GTGTATCACAAACTCCTGGG	ACOX2	427.98	372.4	-0.20022	1546.9	6690.9	0.67957	0.24839	0.75161	0.49678	0.68423	FALSE	390	492	366	412
ACOX2_21556_TGCTGTACCGAGTTTGACGT	ACOX2	706.96	463.11	-0.60922	30063	13121	2.1289	0.016631	0.98337	0.033262	0.11812	FALSE	507	588	454	657
ACOX3_21557_AAGCCACGGCAGTAATACCA	ACOX3	192.33	233.94	0.28124	867.87	2297.3	0.86819	0.80735	0.19265	0.3853	0.58675	TRUE	189	179	181	189
ACOX3_21558_CCGCACGCCTCACCTTAAAG	ACOX3	565.36	308.42	-0.87216	33755	9718.8	2.6063	0.0045761	0.99542	0.0091522	0.046355	FALSE	357	380	432	530
ACOX3_21559_GATCCCAACTGCACATACGA	ACOX3	189.16	123.18	-0.6148	2201.6	2247	1.3919	0.08194	0.91806	0.16388	0.34484	FALSE	236	152	156	200
ACOX3_21560_GCGTCAGTTTGGACCCACAG	ACOX3	211.35	194.79	-0.11712	137.14	2605.1	0.32442	0.3728	0.6272	0.7456	0.86033	FALSE	317	290	158	178
ACOXL_42215_AAGCCACAGCTAATCTCGAA	ACOXL	184.93	94.531	-0.96072	4198.8	2180.3	1.936	0.026396	0.9736	0.052793	0.16229	FALSE	112	84	108	116
ACOXL_42216_ACAGGAACGATGAAACAGTG	ACOXL	359.29	142.27	-1.3304	24767	5293.4	2.9828	0.0014275	0.99857	0.002855	0.018815	FALSE	279	288	216	270
ACOXL_42217_ATGTTTGCAATGACCGAGAG	ACOXL	185.99	168.06	-0.14545	160.89	2196.9	0.38259	0.35099	0.64901	0.70198	0.8321	FALSE	130	179	130	110
ACOXL_42218_TGACAAGGTTCGGATACCCA	ACOXL	248.34	101.22	-1.2865	11349	3230.6	2.5884	0.004815	0.99519	0.0096299	0.048148	FALSE	135	115	136	178
ACP1_157_ACATAGTATATAATCAAATG	ACP1	68.689	22.917	-1.5429	1122.3	585.94	1.8909	0.027106	0.97289	0.054213	0.16521	FALSE	58	85	34	59
ACP1_158_ACCCAGACACACAAACAGCA	ACP1	92.994	104.08	0.16085	61.497	874.71	0.37483	0.64581	0.35419	0.70837	0.83634	TRUE	154	140	76	84
ACP1_159_GGAACCCCCCTGACTACCGA	ACP1	515.69	507.03	-0.024393	37.521	8590.8	0.093461	0.46277	0.53723	0.92554	0.96476	FALSE	648	533	296	363
ACP1_160_GGGGTTCCCTATCTCATACC	ACP1	102.5	105.03	0.03484	3.2006	995.18	0.080199	0.53169	0.46831	0.93662	0.9699	TRUE	81	121	87	85
ACP2_161_ACATGGTGGCCAACGAGACA	ACP2	46.497	27.691	-0.72724	179.75	350.37	1.0047	0.15202	0.84798	0.30403	0.5083	FALSE	31	49	36	41
ACP2_162_ACCAGTGAAGACATATCCCA	ACP2	58.121	190.02	1.692	9417.3	470.03	6.0837	1	5.8935e-10	1.1787e-09	2.9617e-08	TRUE	41	44	18	56
ACP2_163_CACCTCTTATCACCGGCAAG	ACP2	274.75	335.16	0.28575	1828.6	3697.7	0.9933	0.83972	0.16028	0.32056	0.52515	TRUE	235	219	193	251
ACP2_164_TTCTGCAGCTGCTCATAACG	ACP2	357.18	349.48	-0.031362	29.663	5251.8	0.10628	0.45768	0.54232	0.91536	0.95915	FALSE	339	317	208	272
ACP5_165_ACCCACGGCTACAAAGCGCA	ACP5	386.77	378.12	-0.032529	37.373	5842.3	0.11311	0.45497	0.54503	0.90994	0.95673	FALSE	359	373	242	309
ACP5_166_CTGGACACAGTGACACTATG	ACP5	1111.7	811.63	-0.45339	45298	24120	1.9321	0.026674	0.97333	0.053347	0.16337	FALSE	538	613	713	861
ACP5_167_GCTCGGCTATGGACCACACG	ACP5	557.96	654.08	0.22892	4626.4	9548.5	0.98362	0.83735	0.16265	0.3253	0.53004	TRUE	543	479	435	522
ACP5_168_GTACCAGGGCACTTTGCGAA	ACP5	230.37	309.37	0.4238	3137.7	2922.5	1.4614	0.92805	0.071953	0.14391	0.31714	TRUE	342	335	138	187
ACP6_38135_AAAAAGGTGAAGGACAGGAT	ACP6	162.74	221.53	0.44258	1738.2	1839	1.3709	0.91479	0.085213	0.17043	0.35317	TRUE	227	224	138	214
ACP6_38136_ACAGTCACCAATCTAGCTGG	ACP6	252.56	411.54	0.70221	12824	3304.3	2.7657	0.99716	0.0028397	0.0056795	0.032238	TRUE	186	158	182	196
ACP6_38137_ACCAACCTTCAACCCACAGG	ACP6	83.483	88.802	0.088084	14.148	758.29	0.19315	0.57606	0.42394	0.84787	0.92245	TRUE	128	108	67	76
ACP6_38138_GCAGGTCGTGTTTCGACACG	ACP6	367.75	234.9	-0.64449	8934.8	5460.8	1.7978	0.036104	0.9639	0.072208	0.20033	FALSE	313	293	317	354
ACPP_169_AAAGGCAGGTATAGCAACTG	ACPP	555.85	399.13	-0.47681	12364	9500	1.6079	0.053929	0.94607	0.10786	0.26181	FALSE	547	489	315	462
ACPP_170_ACTCCTTGGCTAGTACACTT	ACPP	435.38	350.43	-0.31233	3618.6	6846.4	1.0266	0.1523	0.8477	0.30459	0.50891	FALSE	359	382	290	403
ACPP_171_CTACGACCCTTTATATTGTG	ACPP	329.71	272.13	-0.27593	1661	4718.4	0.83811	0.20098	0.79902	0.40197	0.60185	FALSE	384	346	182	259
ACPP_172_GCCATGAGGATTCCTTTATG	ACPP	421.64	676.04	0.6798	32806	6558.5	3.1413	0.99916	0.00084093	0.0016819	0.01232	TRUE	310	336	263	306
ACPT_56581_AGGCTGGTAGTGGAAGACCG	ACPT	310.68	252.08	-0.30047	1721.7	4357.9	0.8877	0.18735	0.81265	0.3747	0.57703	FALSE	351	402	234	258
ACPT_56582_TATCCTTGCAAACTTCTCCC	ACPT	203.95	203.39	-0.0039987	0.1609	2484.2	0.011382	0.49545	0.50455	0.9909	0.99568	FALSE	142	96	188	214
ACPT_56583_TCGCCATGGCGGAATACCTG	ACPT	678.43	474.57	-0.51469	20946	12414	1.8297	0.033646	0.96635	0.067292	0.19092	FALSE	534	573	519	555
ACPT_56584_TTGGATATTGGAGCCCACGT	ACPT	294.83	314.15	0.091252	186.6	4063.2	0.30303	0.61907	0.38093	0.76187	0.87068	TRUE	267	346	129	166
ACR_145_AAGCGCCCACACGAAATGGG	ACR	433.27	483.16	0.1569	1245.5	6801.9	0.60495	0.72739	0.27261	0.54521	0.72149	TRUE	458	374	313	301
ACR_146_CCCCGACACTTACTCACACG	ACR	154.29	217.71	0.49409	2026	1713	1.5324	0.93728	0.06272	0.12544	0.28925	TRUE	157	141	89	87
ACR_147_GAAAGCGCCTATGTGGTCGT	ACR	236.71	258.77	0.12801	243.34	3030.3	0.40065	0.65566	0.34434	0.68868	0.82361	TRUE	129	194	56	78
ACR_148_TAATGTGCATGACTGGAGAC	ACR	31.702	58.246	0.85733	360.28	211.99	1.8231	0.96535	0.034655	0.06931	0.1948	TRUE	51	41	19	28
ACRBP_53727_AAGAAGCGTTCGTATTCGGT	ACRBP	853.85	880.38	0.04409	351.89	16911	0.204	0.58082	0.41918	0.83836	0.91654	TRUE	774	775	608	782
ACRBP_53728_CAAACCAGGAGGCATAAGGG	ACRBP	640.39	615.88	-0.0562	300.27	11489	0.22862	0.40958	0.59042	0.81916	0.90555	FALSE	662	673	395	497
ACRBP_53729_GACTCTACTTCTCGTACCCG	ACRBP	169.08	323.7	0.93288	12263	1935	3.5149	0.99978	0.00021994	0.00043988	0.0040621	TRUE	285	247	68	113
ACRBP_53730_GGTGCTGTGCTATTCGATCG	ACRBP	1038.8	754.34	-0.46109	40712	22015	1.9171	0.027615	0.97239	0.055229	0.16724	FALSE	918	861	763	968
ACRC_56601_AAACTATTGTGGAGCCACCG	ACRC	499.84	440.19	-0.18295	1780.9	8238.5	0.6572	0.25553	0.74447	0.51105	0.69555	FALSE	422	345	296	351
ACRC_56602_CAAACCACCAAGTGATCCTG	ACRC	265.24	456.42	0.78078	18607	3527.7	3.2188	0.99936	0.00064362	0.0012872	0.0099485	TRUE	297	182	181	199
ACRC_56603_GCATCCTTAATGTCCAGTCA	ACRC	547.4	281.68	-0.95603	36257	9306.6	2.7543	0.0029407	0.99706	0.0058814	0.033141	FALSE	397	385	390	539
ACRC_56604_TTATTGGAAATAAACAGCGA	ACRC	68.689	71.614	0.059334	4.2808	585.94	0.12087	0.54707	0.45293	0.90585	0.95469	TRUE	39	34	16	21
ACRV1_173_CCTGACTCAAGCTCACTCAA	ACRV1	258.9	102.17	-1.333	12922	3415.5	2.6818	0.0036561	0.99634	0.0073123	0.039042	FALSE	213	87	182	271
ACRV1_174_GCTGAAGGTGAGCATACTGT	ACRV1	573.81	523.26	-0.1328	1278.4	9914.3	0.50769	0.30583	0.69417	0.61167	0.77007	FALSE	362	430	369	499
ACRV1_175_TGGTTCAAGCAAGCACACTG	ACRV1	420.59	250.17	-0.74714	14762	6536.5	2.1078	0.017524	0.98248	0.035048	0.12254	FALSE	464	354	293	321
ACRV1_176_TTCAGGTGAGCACGCTTCAG	ACRV1	157.46	78.298	-0.99871	3226.4	1760	1.8868	0.029506	0.97049	0.059013	0.17491	FALSE	94	75	49	65
ACSBG1_32071_GAAGGTGAATAATGCCCAGT	ACSBG1	729.16	478.38	-0.60702	31790	13677	2.1443	0.016006	0.98399	0.032011	0.11509	FALSE	575	618	540	688
ACSBG1_32072_GGAGCCCACATCACACATGG	ACSBG1	351.9	439.24	0.31903	3825.7	5148.1	1.2173	0.88825	0.11175	0.22351	0.41966	TRUE	369	419	238	300
ACSBG1_32073_TCAAAAGAACTTCTATGGAG	ACSBG1	139.49	214.84	0.61951	2871.8	1498.1	1.9468	0.97422	0.025781	0.051561	0.15971	TRUE	144	215	88	102
ACSBG1_32074_TGTGCATCGGATGTTCTACG	ACSBG1	179.65	343.75	0.93237	13813	2097.7	3.583	0.99983	0.00016987	0.00033974	0.0032639	TRUE	138	129	110	126
ACSBG2_51795_AAATTCAGGGATGGTCATCG	ACSBG2	522.03	408.68	-0.35241	6448.5	8732.8	1.213	0.11257	0.88743	0.22513	0.42158	FALSE	393	401	373	468
ACSBG2_51796_ACACGAGAGTCTTAGCCATG	ACSBG2	603.4	479.34	-0.33146	7721.3	10607	1.2046	0.11417	0.88583	0.22834	0.42548	FALSE	630	639	396	522
ACSBG2_51797_GGGACCACAGGCATACCCAA	ACSBG2	374.09	283.59	-0.39833	4114.3	5587.3	1.2107	0.11301	0.88699	0.22602	0.42264	FALSE	302	241	282	287
ACSBG2_51798_TCCATGAAATCATCCCACTG	ACSBG2	712.25	496.53	-0.51963	23456	13253	1.8739	0.030474	0.96953	0.060948	0.17881	FALSE	446	462	614	758
ACSF2_50947_ACGTAGCTGAGGCCTCCGAT	ACSF2	1442.5	1025.5	-0.49177	87549	34258	2.2526	0.012141	0.98786	0.024282	0.09443	FALSE	1102	920	921	1156
ACSF2_50948_ATGGCTCGGATCAACTCTGG	ACSF2	110.96	194.79	0.80635	3582.5	1105.5	2.5214	0.99415	0.0058471	0.011694	0.0556	TRUE	226	156	78	85
ACSF2_50949_CGTGGGGGTACCATACAGGA	ACSF2	209.24	147.05	-0.50594	1948.6	2570.4	1.2266	0.10997	0.89003	0.21994	0.41554	FALSE	213	126	126	139
ACSF2_50950_GTCTTCATGGAGGACGACCA	ACSF2	423.76	279.77	-0.59723	10476	6602.5	1.772	0.038201	0.9618	0.076402	0.20786	FALSE	520	456	367	352
ACSF3_64513_CCATGATCATCTACACCAGT	ACSF3	393.11	240.62	-0.70583	11799	5970.9	1.9734	0.024226	0.97577	0.048453	0.15303	FALSE	277	259	316	315
ACSF3_64514_GCAGCGCGTTGACCACACCA	ACSF3	608.69	411.54	-0.56352	19617	10731	1.9031	0.028517	0.97148	0.057033	0.17101	FALSE	488	471	413	496
ACSF3_64515_TAACGATGCCTCCTACGTCG	ACSF3	898.24	636.89	-0.49539	34402	18104	1.9424	0.026047	0.97395	0.052093	0.16082	FALSE	810	882	515	690
ACSF3_64516_TCTTAAGTTCTGAAACGCCG	ACSF3	150.06	134.64	-0.15537	119.02	1650.8	0.37959	0.35205	0.64795	0.70411	0.83346	FALSE	243	221	94	84
ACSL1_6041_ATCACGTACATAGTCAACAA	ACSL1	163.8	107.9	-0.59769	1579.1	1854.9	1.2978	0.097105	0.90289	0.19421	0.38438	FALSE	215	150	101	162
ACSL1_6042_CAAGAGCCATCGCTTCAGCG	ACSL1	258.9	275.95	0.091674	145.41	3415.5	0.29176	0.61476	0.38524	0.77047	0.87572	TRUE	191	153	85	153
ACSL1_6043_GATGCCAATGAACTGATCTG	ACSL1	508.3	420.14	-0.27421	3894.7	8425.9	0.9604	0.16843	0.83157	0.33685	0.54118	FALSE	610	374	319	394
ACSL1_6044_GTTTCCGAGAGCCTAAACAA	ACSL1	228.26	263.54	0.20652	623.27	2886.8	0.6567	0.74431	0.25569	0.51138	0.69563	TRUE	255	167	142	181
ACSL3_6045_ATGATTACTGCAATATCTGA	ACSL3	38.043	48.698	0.34812	56.978	269.2	0.6494	0.7393	0.2607	0.5214	0.70355	TRUE	28	30	0	2
ACSL3_6046_GAAAGTTCGAAGCTTGCTAG	ACSL3	268.41	465.97	0.79351	19881	3584.1	3.2999	0.99952	0.00048358	0.00096716	0.0078815	TRUE	309	343	186	235
ACSL3_6047_GTGGTGAAGAGTAACCAATG	ACSL3	208.18	139.41	-0.5751	2388.2	2553.1	1.361	0.086737	0.91326	0.17347	0.35708	FALSE	310	309	149	209
ACSL3_6048_TATCTAAAGTATCACATCCA	ACSL3	200.78	281.68	0.48639	3295.8	2432.9	1.6402	0.94952	0.050483	0.10097	0.25039	TRUE	206	186	82	118
ACSL4_6049_AAGCCCACTTCAGACAAACC	ACSL4	668.92	532.81	-0.32766	9292.8	12181	1.2332	0.10874	0.89126	0.21749	0.41269	FALSE	561	616	483	605
ACSL4_6050_ACCTGGTCAGAGAGTGTAAG	ACSL4	1083.2	749.56	-0.53054	56114	23290	2.1859	0.01441	0.98559	0.02882	0.10677	FALSE	919	1033	760	920
ACSL4_6051_GCATCATCACTCCCTTAGGT	ACSL4	346.61	303.65	-0.19035	924.13	5044.9	0.60495	0.27261	0.72739	0.54521	0.72149	FALSE	320	335	226	256
ACSL4_6052_GTGTGTCTGAGGAGATAGCG	ACSL4	507.24	501.3	-0.016954	17.629	8402.4	0.064777	0.47418	0.52582	0.94835	0.97551	FALSE	432	410	336	399
ACSL5_39335_CAGAGTTGGATTCTTCCAAG	ACSL5	321.25	503.21	0.64584	16761	4557.3	2.6954	0.99648	0.0035152	0.0070304	0.037905	TRUE	340	341	214	269
ACSL5_39336_CTTATCCCTATATGATGCTG	ACSL5	281.09	141.32	-0.98705	10051	3812.2	2.2638	0.011789	0.98821	0.023578	0.092391	FALSE	258	153	149	231
ACSL5_39337_CTTGTTGACAATATGTACGA	ACSL5	789.39	512.76	-0.62147	38704	15217	2.2425	0.012464	0.98754	0.024928	0.096233	FALSE	574	514	727	829
ACSL5_39338_TCTGATAGAGCAGAGTACCT	ACSL5	566.42	523.26	-0.11412	931.49	9743.2	0.43719	0.33099	0.66901	0.66197	0.80568	FALSE	404	488	410	503
ACSL6_32395_CTGAGATGCTAAGCCCACGG	ACSL6	508.3	398.18	-0.35148	6085.7	8425.9	1.1997	0.11514	0.88486	0.23027	0.42778	FALSE	590	411	340	409
ACSL6_32396_GATGCTCACCCATGGGAACG	ACSL6	1126.5	663.63	-0.7625	108970	24553	2.9539	0.0015688	0.99843	0.0031376	0.020306	FALSE	1056	1102	856	1141
ACSL6_32397_GTCTCCACAGTGGATCATTG	ACSL6	639.33	726.65	0.18442	3815.9	11463	0.81553	0.79262	0.20738	0.41477	0.61293	TRUE	723	695	451	573
ACSL6_32398_TCTGTCGTCTATTGCCACGG	ACSL6	323.36	305.56	-0.081471	158.63	4597.4	0.26267	0.3964	0.6036	0.79281	0.88991	FALSE	361	302	158	200
ACSM1_57717_CAAGGTCTTTGACTTAACAC	ACSM1	57.064	69.705	0.28415	80.088	458.8	0.59013	0.72137	0.27863	0.55725	0.73085	TRUE	74	61	38	53
ACSM1_57718_CCCCCCAAAAGTGGTTAATG	ACSM1	143.72	238.71	0.72808	4584	1558.7	2.4062	0.99194	0.0080616	0.016123	0.070344	TRUE	190	243	104	137
ACSM1_57719_CGCTGTCCATGGTTCTACCA	ACSM1	170.14	132.73	-0.35587	702.48	1951.1	0.84695	0.19847	0.80153	0.39693	0.59752	FALSE	129	126	110	152
ACSM1_57720_GCACTGCTATACTGGCGGGG	ACSM1	153.23	203.39	0.40622	1264.1	1697.4	1.2174	0.88826	0.11174	0.22347	0.41964	TRUE	192	164	97	109
ACSM2A_58665_ACAGGCTCCCGAGAGGACGT	ACSM2A	361.41	242.53	-0.57349	7135.2	5335.2	1.6275	0.051819	0.94818	0.10364	0.25488	FALSE	288	393	239	276
ACSM2A_58666_GTGCATGCTCCTAATGCCCA	ACSM2A	257.85	262.59	0.026179	11.233	3396.9	0.081325	0.53241	0.46759	0.93519	0.96946	TRUE	100	125	127	180
ACSM2A_58667_TGACGCAGTTCTGTAGATGG	ACSM2A	203.95	321.79	0.6553	7032	2484.2	2.3642	0.99096	0.0090351	0.01807	0.07641	TRUE	253	138	136	183
ACSM2A_58668_TGTCTGAGAAAAGCTGTGAT	ACSM2A	667.86	308.42	-1.1121	66951	12155	3.2602	0.0005566	0.99944	0.0011132	0.0088336	FALSE	668	608	505	611
ACSM2B_69921_ATGTGGACCATATCAGACAC	ACSM2B	431.15	257.81	-0.73964	15269	6757.4	2.1087	0.017486	0.98251	0.034972	0.12235	FALSE	327	338	340	434
ACSM2B_69922_GAAGGGACTCCCCTCCAGCG	ACSM2B	153.23	199.57	0.37901	1078.2	1697.4	1.1247	0.86963	0.13037	0.26074	0.46254	TRUE	241	227	101	109
ACSM2B_69923_TGTCTGAGAAAAGCTGCGAT	ACSM2B	493.5	222.48	-1.1458	38144	8098.6	3.0116	0.0012995	0.9987	0.0025989	0.01745	FALSE	278	260	335	487
ACSM2B_69924_TTACCTTTAGAATAACCAGT	ACSM2B	96.164	32.465	-1.5378	2170.7	914.43	2.1065	0.016858	0.98314	0.033715	0.11927	FALSE	70	87	58	71
ACSM3_16797_ATTTCTGTTGATCCACCAGA	ACSM3	299.06	218.66	-0.44996	3251.5	4141.3	1.2493	0.10577	0.89423	0.21155	0.40597	FALSE	285	300	209	241
ACSM3_16798_GAAGCCTGTTCCCTACAAAG	ACSM3	281.09	508.94	0.85415	26520	3812.2	3.6902	0.99989	0.00011202	0.00022404	0.0022835	TRUE	318	323	172	208
ACSM3_16799_TGAAACAGGACTTCAAACTG	ACSM3	810.53	580.55	-0.48072	26626	15767	1.8315	0.033517	0.96648	0.067033	0.19039	FALSE	471	492	683	765
ACSM3_16800_TGCAACAGCGTCTACTGCTG	ACSM3	814.75	506.08	-0.68593	48309	15878	2.4497	0.0071493	0.99285	0.014299	0.064419	FALSE	620	616	680	919
ACSM4_69317_AGAGGGTGAACCCAATGCCG	ACSM4	472.37	402	-0.23219	2480	7637	0.80525	0.21034	0.78966	0.42068	0.61806	FALSE	316	321	364	417
ACSM4_69318_CACGAGCATCCGGTACACAG	ACSM4	59.178	127.95	1.0995	2450.4	481.33	3.1347	0.99914	0.00086312	0.0017262	0.012583	TRUE	10	48	18	22
ACSM4_69319_CATTCGATGCACAAAAACAC	ACSM4	72.916	152.78	1.0569	3295.4	634.03	3.1716	0.99924	0.00075934	0.0015187	0.011342	TRUE	114	109	30	39
ACSM4_69320_TACAATGGACTCCACCGCTG	ACSM4	542.11	548.09	0.015792	17.866	9186.3	0.062368	0.52487	0.47513	0.95027	0.97635	TRUE	570	519	393	438
ACSM5_41239_ATAACTTTGGCATCAACTCG	ACSM5	243.05	525.17	1.1083	41236	3139.2	5.0353	1	2.3852e-07	4.7704e-07	8.6679e-06	TRUE	277	205	92	149
ACSM5_41240_CTTTACCAGCGGAACCACCG	ACSM5	69.745	63.021	-0.1441	22.625	597.87	0.27502	0.39033	0.60967	0.78066	0.88202	FALSE	175	154	89	78
ACSM5_41241_GTGGAAACACCAGACTGGTG	ACSM5	415.3	314.15	-0.4016	5140.8	6426.7	1.2618	0.10351	0.89649	0.20702	0.40042	FALSE	496	396	307	413
ACSM5_41242_TGGTCAGTGTGGCTTGCATG	ACSM5	550.57	368.58	-0.57766	16726	9379	1.8792	0.03011	0.96989	0.06022	0.17732	FALSE	454	553	415	489
ACSM6_61121_CAGGGATAAAGATCCACCAA	ACSM6	168.02	270.23	0.68227	5295.6	1918.9	2.3331	0.99018	0.0098223	0.019645	0.080894	TRUE	210	201	114	131
ACSM6_61122_CCTGCCTAGGACGGACTCAG	ACSM6	340.27	488.89	0.52153	11133	4921.8	2.1184	0.98293	0.017072	0.034144	0.12029	TRUE	306	222	199	284
ACSM6_61123_TGTCAGATAAGAGCTATGAT	ACSM6	198.67	171.87	-0.20788	359.43	2398.8	0.54707	0.29215	0.70785	0.5843	0.74988	FALSE	206	196	113	153
ACSM6_61124_TTTGCAGATAGAGTGGTGAT	ACSM6	454.4	367.62	-0.305	3776	7250.2	1.0192	0.15406	0.84594	0.30812	0.51246	FALSE	453	467	343	453
ACSS1_53763_ACCAGCATTGGGATAAACTG	ACSS1	268.41	199.57	-0.42575	2383	3584.1	1.15	0.12507	0.87493	0.25013	0.45037	FALSE	105	133	115	140
ACSS1_53764_CAGACAACAAGGTCCACATG	ACSS1	206.07	111.72	-0.87736	4553.2	2518.6	1.88	0.030037	0.96996	0.060074	0.17703	FALSE	102	93	108	130
ACSS1_53765_GATCAAAGCAACGCTCTCGG	ACSS1	380.43	626.39	0.71794	30713	5714.4	3.2537	0.99943	0.00056958	0.0011392	0.0090009	TRUE	341	398	234	371
ACSS1_53766_GCTGAAATACGGTGATGCCT	ACSS1	103.56	138.45	0.41545	611.96	1008.8	1.0986	0.86395	0.13605	0.2721	0.47489	TRUE	34	77	48	58
ACSS2_43695_CAGGAAGGGGAGTCAACATG	ACSS2	212.41	105.03	-1.0091	5939.2	2622.5	2.0967	0.017994	0.98201	0.035988	0.12472	FALSE	216	166	115	155
ACSS2_43696_CAGTGGCCCATAGGTGACGT	ACSS2	536.83	528.04	-0.023775	38.638	9066.4	0.092322	0.46322	0.53678	0.92644	0.96508	FALSE	457	502	438	457
ACSS2_43697_GCATTGTGGTCAAGCACCTG	ACSS2	86.653	127.95	0.55694	860.79	796.63	1.4632	0.92822	0.071785	0.14357	0.3166	TRUE	80	125	72	75
ACSS2_43698_GGAACCAAGGGATTGACTTG	ACSS2	453.34	622.57	0.45676	14408	7227.6	1.9905	0.97673	0.023268	0.046535	0.14881	TRUE	538	478	328	345
ACSS3_49387_ACATGGTATACATCGCCTGT	ACSS3	708.02	473.61	-0.57909	27750	13147	2.0444	0.020458	0.97954	0.040916	0.1363	FALSE	496	430	439	536
ACSS3_49388_CCGGGACCACTAAAGCCCTG	ACSS3	419.53	258.77	-0.69499	13109	6514.5	1.9918	0.023197	0.9768	0.046394	0.14849	FALSE	354	392	273	301
ACSS3_49389_CTTGTACCAGCTGATCTGCT	ACSS3	481.88	257.81	-0.89975	25706	7843.9	2.5299	0.0057042	0.9943	0.011408	0.054566	FALSE	241	212	290	306
ACSS3_49390_GGTGTGATTAGGCCCACTGG	ACSS3	91.937	78.298	-0.22896	93.155	861.57	0.46465	0.3205	0.6795	0.641	0.79053	FALSE	153	160	69	54
ACTA1_177_CTTCTACAACGAGCTTCGCG	ACTA1	205.01	182.38	-0.16789	256.3	2501.4	0.45249	0.32544	0.67456	0.65089	0.79772	FALSE	292	197	191	259
ACTA1_178_GGGTCAGAAAGATTCCTACG	ACTA1	132.09	95.486	-0.46405	674.44	1393.4	0.98068	0.16321	0.83679	0.32641	0.53132	FALSE	163	154	109	152
ACTA1_179_GGTGAAAGCCGGCTTCGCCG	ACTA1	62.348	16.233	-1.8782	1174.4	515.63	2.0309	0.018171	0.98183	0.036341	0.1256	FALSE	50	87	49	60
ACTA1_180_TCAGGTAGTCGGTGAGATCG	ACTA1	815.81	552.86	-0.56047	34895	15906	2.0849	0.018538	0.98146	0.037076	0.12731	FALSE	575	695	557	713
ACTA2_181_CATGTATGTGGCTATCCAGG	ACTA2	122.58	169.01	0.46014	1084.7	1261.8	1.307	0.90437	0.095628	0.19126	0.38051	TRUE	145	179	59	72
ACTA2_182_GAAGCTCATTGTAGAAAGAG	ACTA2	259.96	278.82	0.10067	177.89	3434.1	0.32182	0.6262	0.3738	0.74759	0.8617	TRUE	269	234	196	231
ACTA2_183_GACGTCCCAGACATCAGGTG	ACTA2	143.72	161.37	0.16605	155.95	1558.7	0.44714	0.67257	0.32743	0.65486	0.80075	TRUE	224	201	115	129
ACTA2_184_GGCCTCACCAGTAGTAACGA	ACTA2	190.21	120.31	-0.65647	2474.9	2263.7	1.4692	0.070859	0.92914	0.14172	0.31388	FALSE	148	148	122	153
ACTB_185_AAGAGCTACGAGCTGCCTGA	ACTB	88.767	352.34	1.9768	38552	822.45	9.1908	1	1.9521e-20	3.9042e-20	2.1322e-18	TRUE	59	105	42	45
ACTB_186_CGTACAGGGATAGCACAGCC	ACTB	125.75	269.27	1.0924	10663	1305.3	3.9724	0.99996	3.5586e-05	7.1172e-05	0.00083725	TRUE	214	130	72	91
ACTB_187_GGATTCCTATGTGGGCGACG	ACTB	66.575	134.64	1.0052	2386.3	562.25	2.8703	0.99794	0.0020555	0.0041111	0.025143	TRUE	65	180	56	53
ACTB_188_TCACCTGGGTCATCTTCTCG	ACTB	313.85	447.83	0.51148	9045.1	4417.5	2.0158	0.97809	0.021913	0.043826	0.14274	TRUE	251	195	173	208
ACTBL2_69701_GAGGACGCCCTATCATGGAG	ACTBL2	103.56	64.93	-0.66533	756.22	1008.8	1.2163	0.11145	0.88855	0.22289	0.41894	FALSE	102	122	56	75
ACTBL2_69702_GGAGCTATGAACTTCCTGAT	ACTBL2	257.85	263.54	0.031396	16.215	3396.9	0.097708	0.53892	0.46108	0.92217	0.96304	TRUE	342	359	191	200
ACTBL2_69703_GGAGCTCATTGTAGAATGTG	ACTBL2	124.7	113.63	-0.13298	61.283	1290.7	0.30807	0.37885	0.62115	0.75771	0.86812	FALSE	190	161	121	128
ACTBL2_69704_TGTCCCTCTATGCCTCAGGA	ACTBL2	299.06	289.32	-0.047593	47.41	4141.3	0.15131	0.43986	0.56014	0.87973	0.93982	FALSE	233	229	172	185
ACTC1_189_CGATGGACGGGAAGACAGCG	ACTC1	565.36	286.46	-0.97837	39995	9718.8	2.8291	0.002334	0.99767	0.0046681	0.027761	FALSE	509	520	385	403
ACTC1_190_CTGGGCTTCATCACCTACGT	ACTC1	201.84	203.39	0.010956	1.1954	2449.9	0.031239	0.51245	0.48755	0.9751	0.98791	TRUE	167	116	152	202
ACTC1_191_GGTACGGCCAGAAGCATACA	ACTC1	348.73	391.49	0.16644	915.21	5086.1	0.59965	0.72563	0.27437	0.54874	0.72452	TRUE	284	389	197	210
ACTC1_192_TCTTCATGAGGTAGTCAGTG	ACTC1	398.39	288.37	-0.46491	6092.2	6078.6	1.4112	0.07909	0.92091	0.15818	0.33674	FALSE	317	304	221	315
ACTG1_193_AGCTGTAGCCTCGCTCAGTG	ACTG1	380.43	327.52	-0.21545	1401.8	5714.4	0.69996	0.24198	0.75802	0.48395	0.67376	FALSE	327	269	199	315
ACTG1_194_ATGGAAGGAAACACGGCTCG	ACTG1	338.16	221.53	-0.60798	6876.9	4880.9	1.6694	0.047517	0.95248	0.095033	0.2404	FALSE	444	243	242	229
ACTG1_195_CAACAGAGAGAAGATGACTC	ACTG1	124.7	123.18	-0.017545	1.1543	1290.7	0.042291	0.483	0.517	0.966	0.98368	FALSE	160	107	109	143
ACTG1_196_CTTCTACAACGAGCTGCGCG	ACTG1	168.02	70.66	-1.238	4954.9	1918.9	2.2226	0.013059	0.98694	0.026117	0.099476	FALSE	173	167	150	160
ACTG2_197_AGAGCTATGAGCTGCCAGAT	ACTG2	771.43	490.8	-0.65133	39875	14753	2.3104	0.010433	0.98957	0.020866	0.084454	FALSE	710	654	579	683
ACTG2_198_CTGGATACCTGTGGTCACAA	ACTG2	683.72	550	-0.31346	8966.5	12544	1.1939	0.11626	0.88374	0.23253	0.43061	FALSE	691	580	386	463
ACTG2_199_TGAATCCAGGACGATGCCTG	ACTG2	1403.4	1013.1	-0.46971	76653	33013	2.1479	0.015862	0.98414	0.031724	0.11436	FALSE	857	888	994	1187
ACTG2_200_TGATGATGCCGTGTTCAATG	ACTG2	889.78	550.95	-0.69052	58218	17875	2.5343	0.0056336	0.99437	0.011267	0.054078	FALSE	450	630	612	737
ACTL10_64161_AGAAGATGCCCAAAACGCTG	ACTL10	81.37	105.99	0.37728	304.38	732.99	0.90936	0.81818	0.18182	0.36364	0.56674	TRUE	133	124	49	41
ACTL10_64162_AGATGTGTGATGGCCTTGCG	ACTL10	737.61	586.28	-0.33076	11487	13891	1.284	0.099578	0.90042	0.19916	0.39054	FALSE	667	569	546	590
ACTL10_64163_CACGCCACGCCCATCTACGC	ACTL10	273.7	404.86	0.56314	8683.7	3678.7	2.1625	0.98471	0.015288	0.030577	0.11139	TRUE	199	179	125	158
ACTL10_64164_GGCCACCTTCCGACTGAACG	ACTL10	647.79	312.24	-1.0505	58128	11667	3.1065	0.00094655	0.99905	0.0018931	0.013532	FALSE	539	535	551	653
ACTL6A_205_ACCACCATACCAATAGCTGT	ACTL6A	516.75	445.92	-0.21224	2511.9	8614.4	0.76314	0.22269	0.77731	0.44538	0.6408	FALSE	395	410	347	439
ACTL6A_206_ACTGCAATTCCAGTCCACGA	ACTL6A	19.021	243.49	3.6102	33158	108.88	21.512	1	6.206e-103	1.2412e-102	3.1723e-100	TRUE	6	1	0	1
ACTL6A_207_AGAAGTTGCCTCAGGTTACG	ACTL6A	1311.4	1179.3	-0.15314	8741	30132	0.76143	0.2232	0.7768	0.4464	0.64154	FALSE	952	948	727	1024
ACTL6A_208_TGTTCCGAGGGAGAATATGG	ACTL6A	83.483	470.75	2.4813	87416	758.29	14.063	1	3.1932e-45	6.3863e-45	7.3377e-43	TRUE	107	82	53	49
ACTL6B_38715_AGTGGAACACACGGGCCAAG	ACTL6B	137.38	142.27	0.050171	11.99	1468	0.12781	0.55077	0.44923	0.89845	0.95043	TRUE	93	100	59	83
ACTL6B_38716_ATGCCAGCTTTGCAAACGGG	ACTL6B	907.75	901.39	-0.010131	20.219	18362	0.046929	0.48129	0.51871	0.96257	0.98191	FALSE	811	780	597	757
ACTL6B_38717_CACTCACTGTTCATCGTAGG	ACTL6B	332.88	369.53	0.15028	672.25	4779.2	0.53022	0.70202	0.29798	0.59596	0.75838	TRUE	228	285	245	344
ACTL6B_38718_TTGGCTGCGATCATGTAAGG	ACTL6B	315.97	272.13	-0.21472	961.99	4457.3	0.65654	0.25574	0.74426	0.51147	0.6957	FALSE	236	229	195	299
ACTL7A_29415_ATCGCAAGGAGACATTCGTG	ACTL7A	1360	888.02	-0.61442	112650	31647	2.6533	0.003985	0.99602	0.00797	0.041686	FALSE	1105	1078	909	1096
ACTL7A_29416_GGGCCATGGCGTGTCCTACG	ACTL7A	907.75	909.98	0.0035432	2.4968	18362	0.016491	0.50658	0.49342	0.98684	0.99363	TRUE	873	940	700	875
ACTL7A_29417_GTGGCTCTGAACTCGTATGG	ACTL7A	387.83	737.15	0.92479	62560	5863.7	4.5619	1	2.5348e-06	5.0696e-06	7.6708e-05	TRUE	454	402	293	319
ACTL7A_29418_GTTGTTGAGATCTTGTGGGT	ACTL7A	351.9	102.17	-1.7742	33979	5148.1	3.4805	0.00024977	0.99975	0.00049953	0.0045298	FALSE	220	307	324	379
ACTL7B_29411_ACTCCTACGGCAAGACCTCG	ACTL7B	267.36	473.61	0.82259	21699	3565.3	3.4542	0.99972	0.00027592	0.00055183	0.0049267	TRUE	275	296	98	160
ACTL7B_29412_AGCCGCGCCGACTACGCTGG	ACTL7B	190.21	248.26	0.38248	1692.3	2263.7	1.2201	0.88878	0.11122	0.22245	0.41844	TRUE	160	146	137	146
ACTL7B_29413_CAAGAAGAAGTGCTGCTATG	ACTL7B	894.01	911.89	0.028541	159.89	17989	0.13333	0.55303	0.44697	0.89394	0.94777	TRUE	821	744	597	706
ACTL7B_29414_CGTGGGCAAACGCTGCCCCG	ACTL7B	555.85	497.48	-0.15975	1704.7	9500	0.59884	0.27464	0.72536	0.54928	0.72494	FALSE	418	431	390	513
ACTL8_51715_CTGGTGGAAAGGCTGCACGC	ACTL8	454.4	606.34	0.41535	11602	7250.2	1.7844	0.96282	0.037183	0.074366	0.20425	TRUE	324	327	279	328
ACTL8_51716_GAGACTCTTGAGGAGATAGG	ACTL8	612.91	571.01	-0.10201	878.41	10832	0.40267	0.3436	0.6564	0.68719	0.8226	FALSE	699	731	433	496
ACTL8_51717_TGTCTCCGTGATGATCACAG	ACTL8	451.23	466.93	0.04922	123.17	7182.5	0.18519	0.57346	0.42654	0.85308	0.92576	TRUE	507	524	276	426
ACTL8_51718_TTTAGCTACCCCATCGAGCG	ACTL8	971.15	1237.5	0.34934	35600	20108	1.8783	0.96983	0.030171	0.060342	0.17761	TRUE	927	878	722	938
ACTL9_67813_CAGCCCGCTGACACGACCGT	ACTL9	356.12	549.04	0.62312	18825	5231	2.6674	0.99618	0.0038223	0.0076446	0.04034	TRUE	245	277	226	259
ACTL9_67814_CCCAAACCCCAGTCCCAACG	ACTL9	185.99	337.07	0.85436	11661	2196.9	3.2232	0.99937	0.00063376	0.0012675	0.0098266	TRUE	169	186	117	151
ACTL9_67815_GCTGCCACCAAAGACCGGCG	ACTL9	34.873	59.201	0.74691	301.04	240.17	1.5698	0.94105	0.058946	0.11789	0.2773	TRUE	60	77	13	29
ACTL9_67816_TAAGCACCACTATTGCTACG	ACTL9	750.29	442.1	-0.76174	48311	14213	2.5851	0.0048671	0.99513	0.0097341	0.048518	FALSE	472	468	514	701
ACTN1_209_CAGGACATCAACAATGCCTG	ACTN1	126.81	154.69	0.28465	389.53	1319.9	0.76734	0.77851	0.22149	0.44299	0.63862	TRUE	111	119	50	84
ACTN1_210_GCAGGGCCTTGATCTCCGAG	ACTN1	995.46	749.56	-0.40883	30383	20788	1.7054	0.044056	0.95594	0.088113	0.22891	FALSE	812	841	579	744
ACTN1_211_GGATCCGCCGCACAATCCCG	ACTN1	72.916	171.87	1.2258	5114.4	634.03	3.9301	0.99996	4.2542e-05	8.5084e-05	0.00097832	TRUE	127	114	64	97
ACTN1_212_GGCCCTAACTCAGAAGCGAA	ACTN1	275.81	216.75	-0.34621	1750.2	3716.7	0.96873	0.16634	0.83366	0.33268	0.53725	FALSE	419	302	254	301
ACTN2_213_AGGACTTCCGGGATTACCGC	ACTN2	110.96	197.66	0.82731	3835.3	1105.5	2.6075	0.99544	0.0045616	0.0091232	0.046247	TRUE	101	145	74	76
ACTN2_214_CCAGGTTAATATTTCCTATG	ACTN2	125.75	128.91	0.035448	4.971	1305.3	0.087272	0.53466	0.46534	0.93069	0.96722	TRUE	183	168	65	78
ACTN2_215_CGAGTCGGCGTCGCTGACAG	ACTN2	300.12	196.7	-0.607	5406.5	4160.8	1.6032	0.054441	0.94556	0.10888	0.26333	FALSE	250	299	221	238
ACTN2_216_TGATGGTCCAGATCATACCC	ACTN2	289.55	551.91	0.92826	35296	3966.2	4.1659	0.99998	1.5504e-05	3.1008e-05	0.00039802	TRUE	228	162	154	206
ACTN3_217_CAGTGAGCTGGACTACCACG	ACTN3	1064.1	513.71	-1.0492	156400	22742	3.65	0.00013112	0.99987	0.00026224	0.002615	FALSE	791	732	849	1078
ACTN3_218_CCATGGCTGGAGAACCGTGT	ACTN3	89.824	95.486	0.087252	16.035	835.44	0.1959	0.57726	0.42274	0.84548	0.92097	TRUE	154	83	55	76
ACTN3_219_GTCCAGGGCCTTGTTAACGT	ACTN3	218.75	296.96	0.43928	3076.5	2727.4	1.4977	0.93289	0.067112	0.13422	0.30306	TRUE	151	181	142	192
ACTN3_220_TGCAACTGGAGTTTGCCCGG	ACTN3	54.951	100.26	0.85583	1049.3	436.54	2.1686	0.98488	0.015122	0.030244	0.11058	TRUE	41	60	30	29
ACTN4_201_ACAGATCGAGAACATTGATG	ACTN4	232.48	201.48	-0.20558	481.4	2958.3	0.57012	0.28429	0.71571	0.56858	0.74005	FALSE	237	168	119	173
ACTN4_202_ACTCCCACAATGTCAACACC	ACTN4	380.43	624.48	0.71354	30232	5714.4	3.2284	0.99938	0.00062236	0.0012447	0.0096819	TRUE	373	321	165	223
ACTN4_203_GTTCATCGTCCATACCATCG	ACTN4	333.93	332.29	-0.0070869	1.3468	4799.5	0.023691	0.49055	0.50945	0.9811	0.99102	FALSE	369	346	222	300
ACTN4_204_TGGGCGGCTTGTGCACACGC	ACTN4	197.61	364.76	0.88093	14291	2381.8	3.4248	0.99969	0.00030759	0.00061518	0.0054038	TRUE	220	152	97	123
ACTR10_43603_AAAAAGATATGGGTAACACC	ACTR10	50.724	50.608	-0.0032489	0.0067684	392.87	0.00587	0.49501	0.50499	0.99002	0.99525	FALSE	25	24	29	23
ACTR10_43604_AATGAATTTACCCATCACTG	ACTR10	47.554	105.99	1.1398	1773.9	360.88	3.0761	0.99894	0.0010553	0.0021106	0.014761	TRUE	93	45	32	39
ACTR10_43605_AATGGATAGTCAACATTTGG	ACTR10	88.767	154.69	0.7944	2214	822.45	2.2986	0.98923	0.010774	0.021548	0.086467	TRUE	128	107	70	64
ACTR10_43606_ATTCGATAATCACAACTCGG	ACTR10	4.227	17.187	1.7989	93.304	15.791	3.2614	0.99935	0.00064725	0.0012945	0.0099878	TRUE	1	0	0	0
ACTR1A_27069_AGTCGTAGCCCTCCTTACGC	ACTR1A	16.908	16.233	-0.05546	0.22808	93.436	0.069867	0.45008	0.54992	0.90016	0.95134	FALSE	59	31	16	6
ACTR1A_27070_CGCTACAGGCAGGACCACAG	ACTR1A	12.681	7.6389	-0.66326	12.909	64.384	0.62838	0.22043	0.77957	0.44087	0.63671	FALSE	8	23	1	0
ACTR1A_27071_GAAGGTCTCGAAGAAAACTT	ACTR1A	11.624	92.621	2.8906	4021.5	57.544	10.677	1	6.9201e-27	1.384e-26	9.8693e-25	TRUE	31	30	2	2
ACTR1A_27072_TGACACGAACGTGCTTGGGT	ACTR1A	28.532	50.608	0.80529	248.57	184.7	1.6243	0.9469	0.053102	0.1062	0.25915	TRUE	0	17	5	5
ACTR1B_27065_CTTCATCGGACCAAAAGCAG	ACTR1B	28.532	62.066	1.0946	582.86	184.7	2.4675	0.99307	0.0069279	0.013856	0.062962	TRUE	61	38	13	13
ACTR1B_27066_GCATCCTGTGCTCCTCACGG	ACTR1B	131.04	138.45	0.078856	27.518	1378.6	0.19978	0.57909	0.42091	0.84183	0.91895	TRUE	100	82	55	75
ACTR1B_27067_GGTTGTCCGGACAATCAAAG	ACTR1B	138.43	50.608	-1.4339	4090.3	1483	2.2806	0.011125	0.98888	0.02225	0.088625	FALSE	171	111	113	128
ACTR1B_27068_TCCGTCCTAACAGTGTCGGG	ACTR1B	122.58	149.91	0.28824	374.41	1261.8	0.7694	0.77911	0.22089	0.44178	0.63755	TRUE	87	74	54	80
ACTR2_26993_ACTGGTGTAGTGGTAGACTC	ACTR2	97.221	398.18	2.0229	50473	927.77	9.8806	1	2.5285e-23	5.0571e-23	3.1255e-21	TRUE	85	106	35	40
ACTR2_26994_ATCCTCGCAACAGAAGTAGC	ACTR2	712.25	930.03	0.38443	23820	13253	1.8918	0.97074	0.029259	0.058518	0.17395	TRUE	718	582	506	546
ACTR2_26995_GGACGTATCATCAAAGTTGG	ACTR2	54.951	380.99	2.7713	63875	436.54	15.605	1	3.3946e-55	6.7893e-55	9.5594e-53	TRUE	48	43	15	15
ACTR2_26996_GGATGACATGAAACACCTGT	ACTR2	133.15	250.17	0.90483	7014.4	1408.3	3.1184	0.99909	0.0009094	0.0018188	0.013103	TRUE	68	117	84	118
ACTR3_26989_ACCGGTACGGTAATAGACAG	ACTR3	91.937	276.91	1.5803	18343	861.57	6.3018	1	1.4727e-10	2.9454e-10	7.9091e-09	TRUE	110	175	54	60
ACTR3_26990_ATTAAGGAGTCAGCAAAAGT	ACTR3	137.38	179.51	0.3835	891.69	1468	1.0998	0.86426	0.13574	0.27148	0.47425	TRUE	81	130	95	91
ACTR3_26991_CCCAATCTTCAACTATACCA	ACTR3	39.1	148	1.8937	6539.5	279.05	6.5193	1	3.566e-11	7.132e-11	2.015e-09	TRUE	59	54	57	43
ACTR3_26992_TTAACAAGTATGATACAGAT	ACTR3	82.426	59.201	-0.47071	271.53	745.61	0.85055	0.19649	0.80351	0.39298	0.59396	FALSE	103	164	37	67
ACTR3B_45215_AGGTAGTTGACCAAGCTCAA	ACTR3B	183.87	311.28	0.75632	8255.5	2163.7	2.7391	0.99692	0.0030808	0.0061616	0.034325	TRUE	182	169	118	149
ACTR3B_45216_TACTGTTTGATCCACTTCCG	ACTR3B	245.17	317.97	0.37378	2661.3	3175.7	1.2919	0.9018	0.098196	0.19639	0.38727	TRUE	242	271	135	159
ACTR3B_45217_TGGGTGAACGTACGTTAACG	ACTR3B	735.5	536.63	-0.45406	19896	13837	1.6906	0.045459	0.95454	0.090918	0.23349	FALSE	694	519	469	572
ACTR3B_45218_TTTGAATCATTTAACGTACC	ACTR3B	291.66	192.88	-0.59406	4930.6	4004.9	1.5609	0.059271	0.94073	0.11854	0.27837	FALSE	418	427	249	330
ACTR3C_74418_CATTTGCCCCGATATAGTCA	ACTR3C	88.767	143.23	0.68411	1504	822.45	1.8991	0.97119	0.028806	0.057613	0.17217	TRUE	72	52	67	69
ACTR3C_74419_GCTTACCACTGGGATAACAT	ACTR3C	108.85	36.285	-1.5588	2820.9	1077.6	2.2104	0.013089	0.98691	0.026177	0.099616	FALSE	97	95	52	52
ACTR3C_74420_TACTGTTTGATCCACTTCTG	ACTR3C	140.55	143.23	0.027074	3.5952	1513.2	0.068932	0.52741	0.47259	0.94519	0.97388	TRUE	304	281	86	122
ACTR3C_74421_TGGGTGAACGTACATTAACG	ACTR3C	816.87	878.47	0.10477	1898.2	15933	0.48805	0.68724	0.31276	0.62552	0.77994	TRUE	1010	881	590	838
ACTR5_50339_CGGGACACGCCCAGCCAGCG	ACTR5	254.68	347.57	0.44713	4340.5	3341.2	1.607	0.94598	0.054023	0.10805	0.26213	TRUE	214	222	160	216
ACTR5_50340_TCATTTGCCGTGAATACAGT	ACTR5	171.19	188.11	0.13518	143.12	1967.3	0.38134	0.64851	0.35149	0.70299	0.83276	TRUE	204	142	115	162
ACTR5_50341_TGAGCACAGCTACATCGCTG	ACTR5	87.71	231.08	1.3874	10856	809.51	5.0389	1	2.3437e-07	4.6874e-07	8.521e-06	TRUE	119	106	72	71
ACTR5_50342_TGGGTAAAACATGCGTACAC	ACTR5	136.32	75.434	-0.84526	1893.5	1453	1.5973	0.054933	0.94507	0.10987	0.26488	FALSE	156	108	73	61
ACTR6_47795_AGATGTATGCTATGTGTCTC	ACTR6	254.68	216.75	-0.23162	720.25	3341.2	0.65607	0.25589	0.74411	0.51177	0.69578	FALSE	322	271	171	217
ACTR6_47796_ATAATTCGGAAGGATTATCT	ACTR6	136.32	125.09	-0.12313	63.129	1453	0.29471	0.384	0.616	0.768	0.87432	FALSE	115	147	72	115
ACTR6_47797_CTCCCCTTGCAGGATAAATG	ACTR6	313.85	262.59	-0.25641	1316.8	4417.5	0.77136	0.22025	0.77975	0.44049	0.63638	FALSE	290	306	248	285
ACTR6_47798_GGATGTAAAAGAGTCCAGAA	ACTR6	10.567	18.142	0.72669	29.199	50.893	1.0618	0.84511	0.15489	0.30978	0.51414	TRUE	4	10	1	1
ACTR8_56605_AGCCAACTGTCCTTGTATAG	ACTR8	83.483	252.08	1.5829	15243	758.29	6.1227	1	4.6067e-10	9.2135e-10	2.3447e-08	TRUE	67	123	79	86
ACTR8_56606_CAACGATTCCAAAAGTTGCG	ACTR8	442.78	249.22	-0.82665	19114	7002.7	2.313	0.01036	0.98964	0.020721	0.084035	FALSE	470	494	395	429
ACTR8_56607_CACGTGTATTGTAGACGTTG	ACTR8	648.84	775.35	0.25661	8017.3	11693	1.1699	0.87898	0.12102	0.24205	0.44158	TRUE	798	622	371	461
ACTR8_56608_CTTCTCCTACTAAATACTCA	ACTR8	61.291	85.937	0.48094	305.86	504.13	1.0977	0.86339	0.13661	0.27321	0.4761	TRUE	71	38	13	25
ACTRT1_60749_ACGGAGCTGATGACATGGCG	ACTRT1	187.04	95.486	-0.96268	4307.5	2213.6	1.946	0.025791	0.97421	0.051581	0.15973	FALSE	111	155	118	175
ACTRT1_60750_GGTAACAGGATGGGATGACA	ACTRT1	538.94	275	-0.96814	35799	9114.3	2.7647	0.0028488	0.99715	0.0056976	0.032317	FALSE	396	444	396	510
ACTRT1_60751_TGATTAGACAGGTAGAAACC	ACTRT1	132.09	99.305	-0.40804	540.25	1393.4	0.87836	0.18971	0.81029	0.37942	0.58141	FALSE	131	106	53	68
ACTRT1_60752_TTAATCAGAAGTACTTCGTG	ACTRT1	147.94	251.13	0.75938	5415.4	1620	2.5636	0.99482	0.00518	0.01036	0.050852	TRUE	258	202	100	137
ACTRT2_60861_CGCAGTCACCAAGCTCCACG	ACTRT2	550.57	466.93	-0.23725	3503.7	9379	0.86364	0.19389	0.80611	0.38779	0.58908	FALSE	471	408	308	386
ACTRT2_60862_CGTGCCCGCTTTCTACCTGT	ACTRT2	572.76	387.67	-0.56188	17290	9889.8	1.8611	0.031363	0.96864	0.062726	0.18216	FALSE	390	340	464	505
ACTRT2_60863_GAATTTCAGGTGCCCCACGA	ACTRT2	149	171.87	0.20475	261.93	1635.4	0.56561	0.71414	0.28586	0.57173	0.742	TRUE	220	201	76	117
ACTRT2_60864_GATCAGGCCACGCTCGAAAG	ACTRT2	436.44	455.47	0.061439	181.11	6868.6	0.22963	0.59081	0.40919	0.81838	0.90514	TRUE	568	478	181	272
ACTRT3_53719_AATGTTCGGGTAGATAAACT	ACTRT3	94.051	116.49	0.30581	252.55	887.9	0.75316	0.77414	0.22586	0.45172	0.64661	TRUE	138	91	47	69
ACTRT3_53720_CACTGAGCAACATGATACCA	ACTRT3	215.58	121.27	-0.82484	4537.8	2674.8	1.8235	0.034098	0.9659	0.068196	0.19266	FALSE	102	139	112	118
ACTRT3_53721_GGCGGGCTAGAACTCTGCGT	ACTRT3	112.02	102.17	-0.13149	48.491	1119.5	0.29426	0.38403	0.61597	0.76806	0.87433	FALSE	150	129	94	89
ACTRT3_53722_TGTGGCAATGAACTACGAAG	ACTRT3	47.554	90.712	0.91753	955.1	360.88	2.2718	0.98838	0.01162	0.023239	0.091464	TRUE	111	81	23	19
ACVR1_221_ATTACACTGTTGGAGTGTGT	ACVR1	290.61	444.96	0.61291	12047	3985.5	2.4451	0.99276	0.0072414	0.014483	0.065018	TRUE	292	312	196	242
ACVR1_222_CCATGACTTCTCATCACGGG	ACVR1	373.03	173.78	-1.0976	20556	5566.1	2.6706	0.003785	0.99622	0.0075699	0.040028	FALSE	342	315	307	425
ACVR1_223_CTGGTGTAACAGGAACATCA	ACVR1	131.04	150.87	0.20188	196.88	1378.6	0.5341	0.7033	0.2967	0.5934	0.7564	TRUE	145	194	80	119
ACVR1_224_GCCATCGTTGATGCTCAGTG	ACVR1	143.72	213.89	0.57035	2486.1	1558.7	1.7773	0.96224	0.037761	0.075522	0.20635	TRUE	93	93	59	86
ACVR1B_225_AAGAGATTATTGGCAAGGGT	ACVR1B	81.37	67.795	-0.25981	92.326	732.99	0.50139	0.30713	0.69287	0.61426	0.77187	FALSE	134	75	14	20
ACVR1B_226_ACTTGACTCAGGTCACCTCA	ACVR1B	455.46	430.64	-0.080649	308	7272.8	0.291	0.38553	0.61447	0.77105	0.87604	FALSE	394	436	270	351
ACVR1B_227_CCGGTTCAGATAATCAAACA	ACVR1B	82.426	101.22	0.29303	176.97	745.61	0.68808	0.75399	0.24601	0.49202	0.68044	TRUE	113	106	81	105
ACVR1B_228_CTACACGTGTGAGACAGATG	ACVR1B	49.667	54.427	0.12954	11.334	382.13	0.24349	0.59394	0.40606	0.81212	0.90172	TRUE	28	54	29	45
ACVR1C_59805_ATTGTCCTTTGAACCAACAG	ACVR1C	200.78	275	0.45187	2771.1	2432.9	1.5047	0.9338	0.066203	0.13241	0.30042	TRUE	167	163	142	167
ACVR1C_59806_CCAAGATCTTTCATCTCTGG	ACVR1C	318.08	336.11	0.079298	162.56	4497.2	0.26885	0.60598	0.39402	0.78805	0.88702	TRUE	262	265	283	313
ACVR1C_59807_CTGGCGCTCTCAATTGCTAG	ACVR1C	247.28	296.96	0.26316	1236.7	3212.3	0.87659	0.80964	0.19036	0.38071	0.58251	TRUE	328	346	196	223
ACVR1C_59808_TGTAGGAGCACTGTCGACCC	ACVR1C	199.73	107.9	-0.88223	4314.2	2415.8	1.8683	0.03084	0.96916	0.06168	0.18022	FALSE	195	203	141	204
ACVR2A_229_AGTGGTTTCAAACCTAGTAA	ACVR2A	183.87	248.26	0.43113	2084.6	2163.7	1.3842	0.91686	0.083145	0.16629	0.34783	TRUE	203	175	122	134
ACVR2A_230_ATTGCAGAAACCATGGCTAG	ACVR2A	269.47	395.31	0.55116	7990.2	3603	2.0965	0.98198	0.01802	0.03604	0.12487	TRUE	222	191	182	179
ACVR2A_231_CCAAAGATCCACATCAACAC	ACVR2A	33.816	71.614	1.0605	738.83	230.68	2.4887	0.9935	0.0064954	0.012991	0.06005	TRUE	11	21	17	15
ACVR2A_232_CCAGTTGCTTAACGAATATG	ACVR2A	471.31	312.24	-0.59247	12785	7614.1	1.823	0.034154	0.96585	0.068307	0.19288	FALSE	463	569	361	402
ACVR2B_233_ACAAGCCGTCTATTGCCCAC	ACVR2B	237.77	368.58	0.63026	8657.2	3048.4	2.3692	0.99109	0.0089141	0.017828	0.075695	TRUE	285	174	96	130
ACVR2B_234_ATGACTTCAACTGCTACGAT	ACVR2B	173.31	160.42	-0.11084	83.11	1999.7	0.28826	0.38654	0.61346	0.77308	0.87734	FALSE	109	123	75	93
ACVR2B_235_ATGTCCACATGACCGTAGGG	ACVR2B	195.5	311.28	0.66834	6792.9	2347.9	2.3896	0.99157	0.0084347	0.016869	0.072739	TRUE	291	274	155	170
ACVR2B_236_CTGGAGCGCACCAACCAGAG	ACVR2B	129.98	153.73	0.24043	282.58	1363.9	0.64316	0.73988	0.26012	0.52023	0.70272	TRUE	253	200	126	131
ACVRL1_237_AGGCACCCCCAGGAACATCG	ACVRL1	117.3	43.924	-1.3969	2847.6	1190.1	2.127	0.01638	0.98362	0.032759	0.11686	FALSE	62	28	82	107
ACVRL1_238_CCAGGACTGTTCATCCCTCG	ACVRL1	345.56	346.61	0.0043953	0.55907	5024.3	0.014918	0.50595	0.49405	0.9881	0.9943	TRUE	238	235	221	264
ACVRL1_239_CTGCGTGCTCGAGTTGCGGG	ACVRL1	402.62	266.41	-0.59397	9375.4	6165.2	1.7348	0.041387	0.95861	0.082774	0.21953	FALSE	343	374	271	312
ACVRL1_240_TGGACAGTGACTGCACCACA	ACVRL1	236.71	285.5	0.26934	1192.9	3030.3	0.88634	0.81228	0.18772	0.37544	0.57768	TRUE	228	182	161	185
ACY1_241_AGGCACAAAGGTCATGTGGA	ACY1	385.71	348.52	-0.14587	691.97	5820.9	0.48744	0.31297	0.68703	0.62595	0.78034	FALSE	431	403	249	296
ACY1_242_CCATGCCTCACGCTTCATGG	ACY1	352.95	342.79	-0.042014	51.608	5168.8	0.14131	0.44381	0.55619	0.88763	0.94431	FALSE	250	334	275	311
ACY1_243_GCTGGACAGTGCGGATACGC	ACY1	368.81	265.45	-0.47289	5376.9	5481.9	1.3959	0.081367	0.91863	0.16273	0.34327	FALSE	285	333	221	328
ACY1_244_TAGCTTAGTCAGGTTCACGG	ACY1	220.86	325.61	0.5579	5537.2	2762.6	1.9929	0.97686	0.023138	0.046276	0.14816	TRUE	197	237	81	131
ACY3_55965_CACCTCATATGGGTCGTCCG	ACY3	674.21	603.47	-0.15965	2503.6	12311	0.63751	0.2619	0.7381	0.52379	0.70525	FALSE	621	702	470	570
ACY3_55966_CTTCCTGTACCAGCGGTCTG	ACY3	234.6	295.05	0.32952	1833.3	2994.3	1.1048	0.86537	0.13463	0.26926	0.47195	TRUE	304	449	195	204
ACY3_55967_GTGCATGGCAAAGACTTCGT	ACY3	84.54	89.757	0.085409	13.611	771.01	0.18788	0.57402	0.42598	0.85196	0.92512	TRUE	39	44	66	62
ACY3_55968_TGAGGTCATGGTCCACGTAG	ACY3	42.27	63.976	0.58653	238.07	309.12	1.2345	0.89061	0.10939	0.21877	0.41428	TRUE	13	24	16	15
ACYP1_245_ACAGTGCAAGGACAATTGCA	ACYP1	749.23	534.72	-0.48586	23171	14186	1.8011	0.035847	0.96415	0.071694	0.19926	FALSE	488	386	359	531
ACYP1_246_TAGGCTGAGGGTAAAAAGCT	ACYP1	164.85	143.23	-0.20154	234.08	1870.9	0.49993	0.30851	0.69149	0.61703	0.77382	FALSE	236	210	131	165
ACYP1_247_TGGGTCCAGAACACTGACCG	ACYP1	233.54	332.29	0.50694	4913.4	2976.3	1.8101	0.96486	0.035142	0.070283	0.19673	TRUE	167	123	165	161
ACYP1_248_TTCCTGCATATGACGCACCT	ACYP1	250.45	323.7	0.36883	2693.6	3267.4	1.2814	0.89998	0.10002	0.20004	0.39184	TRUE	187	247	136	163
ACYP2_249_ACCAGCAAAGGCACCGTGAC	ACYP2	345.56	182.38	-0.91827	13647	5024.3	2.3021	0.010664	0.98934	0.021329	0.085844	FALSE	291	166	169	176
ACYP2_250_CGCCCAGTCACTCAAATCCG	ACYP2	154.29	259.72	0.74759	5651.5	1713	2.5475	0.99457	0.0054255	0.010851	0.052634	TRUE	140	112	101	128
ACYP2_251_GAGGTGTTCGGAAGAGTGCA	ACYP2	370.92	249.22	-0.5718	7478.1	5523.9	1.6374	0.050769	0.94923	0.10154	0.25137	FALSE	339	328	309	353
ACYP2_252_TGAAGCTAGGAAAATAGGAG	ACYP2	264.19	331.34	0.32563	2261.7	3508.9	1.1336	0.87152	0.12848	0.25697	0.45833	TRUE	234	164	139	156
ADA_253_CACAGACTGGTCCCCCAAGG	ADA	243.05	309.37	0.34682	2207.3	3139.2	1.1837	0.88174	0.11826	0.23652	0.43504	TRUE	194	158	183	212
ADA_254_TCACCGTACTGTCCACGCCG	ADA	361.41	338.02	-0.096242	273.56	5335.2	0.32019	0.37441	0.62559	0.74882	0.86251	FALSE	438	322	287	328
ADA_255_TCCCAGCTAACACAGCAGAG	ADA	133.15	56.337	-1.2263	3082.2	1408.3	2.0469	0.020144	0.97986	0.040288	0.13493	FALSE	125	114	80	106
ADA_256_TGGACATACTCAAGACAGAG	ADA	209.24	118.4	-0.81618	4207.7	2570.4	1.7916	0.036579	0.96342	0.073159	0.20206	FALSE	156	162	164	225
ADAD1_60069_AACTGGTGCAAGGCTGACAC	ADAD1	998.63	905.21	-0.14155	4366.3	20877	0.64655	0.25896	0.74104	0.51792	0.70088	FALSE	901	800	763	956
ADAD1_60070_AGGTGAATACAATTACAGCC	ADAD1	152.17	158.51	0.058467	20.068	1681.8	0.15447	0.56134	0.43866	0.87733	0.93846	TRUE	195	165	85	123
ADAD1_60071_CGATAACTACACCCACAGGA	ADAD1	122.58	111.72	-0.13275	59.047	1261.8	0.30585	0.37969	0.62031	0.75937	0.86902	FALSE	181	139	61	121
ADAD1_60072_TCAAATGCAGATATAGAATG	ADAD1	290.61	231.08	-0.32942	1777.7	3985.5	0.94296	0.17285	0.82715	0.3457	0.54981	FALSE	260	324	206	259
ADAD2_63481_ACAGAGATCCCGCGTGCCAG	ADAD2	479.76	157.55	-1.6004	55731	7797.8	3.6489	0.00013168	0.99987	0.00026336	0.0026245	FALSE	290	291	300	318
ADAD2_63482_CACTGCGAATAGCAAGACGG	ADAD2	336.05	139.41	-1.2633	20238	4840.2	2.8264	0.0023531	0.99765	0.0047061	0.02792	FALSE	379	254	357	476
ADAD2_63483_TCACCTACCTACGCTCAGGG	ADAD2	366.69	198.61	-0.88131	14452	5439.8	2.2789	0.011336	0.98866	0.022672	0.089874	FALSE	237	236	181	238
ADAD2_63484_TTCAAATATAGAGCCCCTGG	ADAD2	222.97	331.34	0.56931	5928.4	2797.9	2.0486	0.97975	0.02025	0.040501	0.13535	TRUE	212	215	163	156
ADAL_63465_ACTAATGGATCCATTCAAGT	ADAL	189.16	138.45	-0.4474	1293.2	2247	1.0696	0.14236	0.85764	0.28472	0.48881	FALSE	220	202	136	191
ADAL_63466_CAATCACAGTCATCTGATCG	ADAL	680.55	493.66	-0.46237	17575	12466	1.6738	0.047086	0.95291	0.094172	0.23895	FALSE	586	610	334	435
ADAL_63467_GGAGACTGTAAAACTTGCCG	ADAL	349.78	500.35	0.51523	11425	5106.8	2.1069	0.98244	0.017563	0.035126	0.12275	TRUE	314	267	293	316
ADAL_63468_TATGTGGAATCTATACTTGA	ADAL	454.4	408.68	-0.15264	1046	7250.2	0.53697	0.29564	0.70436	0.59129	0.75473	FALSE	498	718	400	525
ADAM10_261_CCCATAAATACGGTCCTCAG	ADAM10	82.426	56.337	-0.54104	343.39	745.61	0.95546	0.16862	0.83138	0.33724	0.54154	FALSE	85	69	32	47
ADAM10_262_GGAAATGGAATGGTAGAACA	ADAM10	171.19	89.757	-0.92395	3400.7	1967.3	1.8361	0.03312	0.96688	0.06624	0.18881	FALSE	319	264	171	242
ADAM10_263_TTCCATCAATAACAGACCCA	ADAM10	149	116.49	-0.3524	530.4	1635.4	0.80387	0.21065	0.78935	0.42129	0.61856	FALSE	60	69	86	115
ADAM10_264_TTTCAACCTACGAATGAAGA	ADAM10	169.08	162.33	-0.058455	22.808	1935	0.15353	0.43896	0.56104	0.87791	0.93884	FALSE	164	153	103	107
ADAM11_11265_GCTCATGGTCTACCGACGGG	ADAM11	500.9	571.96	0.19104	2527.7	8261.8	0.78181	0.78284	0.21716	0.43433	0.63061	TRUE	326	326	335	476
ADAM11_11266_GCTCCACGTATTGCGAGGAG	ADAM11	675.26	608.25	-0.15056	2247.1	12337	0.60337	0.27313	0.72687	0.54626	0.72239	FALSE	603	570	508	623
ADAM11_11267_GTTCGAGCAGATGCGACAGT	ADAM11	374.09	227.26	-0.71658	10945	5587.3	1.9644	0.024744	0.97526	0.049487	0.15521	FALSE	335	266	188	231
ADAM11_11268_TGGGAACTTGACTTACATCG	ADAM11	141.6	116.49	-0.27944	316.04	1528.3	0.64234	0.26022	0.73978	0.52044	0.70288	FALSE	164	129	84	99
ADAM12_21217_AAGCAATGGTACTTGCCCGG	ADAM12	117.3	313.19	1.4092	20298	1190.1	5.6785	1	6.7951e-09	1.359e-08	3.0295e-07	TRUE	223	141	80	95
ADAM12_21218_ACTGAACATTCGGATCGTGT	ADAM12	308.57	148.96	-1.0457	13151	4318.3	2.4289	0.0075709	0.99243	0.015142	0.067232	FALSE	280	242	174	183
ADAM12_21219_GGTGATCCTTATGGCAACTG	ADAM12	361.41	381.94	0.079519	210.9	5335.2	0.28115	0.6107	0.3893	0.77859	0.88084	TRUE	125	213	222	335
ADAM12_21220_TGCTGAATATTCGACTACAA	ADAM12	127.87	86.892	-0.55207	847.21	1334.5	1.1216	0.13081	0.86919	0.26161	0.46339	FALSE	109	72	110	153
ADAM15_22885_AGTGCCACTCGTACATTCAG	ADAM15	362.46	287.41	-0.33368	2825.8	5356.1	1.0255	0.15256	0.84744	0.30512	0.50939	FALSE	217	254	277	352
ADAM15_22886_CTCCAGACAGCTAATACTCG	ADAM15	482.93	374.3	-0.36675	5924	7866.9	1.2247	0.11034	0.88966	0.22067	0.41644	FALSE	499	448	267	387
ADAM15_22887_CTGTTGTCAAAATTGCCAGG	ADAM15	787.28	632.12	-0.31623	12074	15162	1.2601	0.10382	0.89618	0.20764	0.40124	FALSE	759	734	653	817
ADAM15_22888_TGGATTCGCGAAATAATGGG	ADAM15	605.52	370.49	-0.70724	28032	10656	2.2768	0.0114	0.9886	0.0228	0.090204	FALSE	563	699	525	586
ADAM17_18613_AATCAGAATCAACACAGATG	ADAM17	77.143	105.99	0.45329	418.68	683.06	1.1037	0.86493	0.13507	0.27013	0.47287	TRUE	144	114	20	24
ADAM17_18614_ACAAAATTTCAAGGTCGTGG	ADAM17	440.66	325.61	-0.43539	6656.7	6957.9	1.3793	0.083895	0.91611	0.16779	0.3496	FALSE	420	372	388	445
ADAM17_18615_CATCGCTTCTACAGATACAT	ADAM17	298	91.667	-1.69	23032	4121.7	3.2139	0.00065292	0.99935	0.0013058	0.01006	FALSE	163	253	228	327
ADAM17_18616_TGGTGAAAAGCACTACAACA	ADAM17	176.48	77.344	-1.1797	5116.6	2048.6	2.1903	0.014205	0.98579	0.02841	0.10563	FALSE	296	209	176	221
ADAM18_22881_AAAATCCCATTACCACACAC	ADAM18	99.334	127.95	0.36201	411.1	954.59	0.92622	0.82272	0.17728	0.35456	0.55821	TRUE	17	8	28	25
ADAM18_22882_AGTAAGTATGCTATGTCATG	ADAM18	172.25	193.84	0.16941	233.19	1983.5	0.4847	0.68604	0.31396	0.62793	0.78165	TRUE	252	182	141	211
ADAM18_22883_AGTGCCTGCTATTGACAACT	ADAM18	354.01	303.65	-0.22073	1270.2	5189.5	0.69915	0.24223	0.75777	0.48446	0.67398	FALSE	341	403	347	432
ADAM18_22884_TATAACAGTCAATTTGAACT	ADAM18	68.689	24.826	-1.4321	1021.3	585.94	1.812	0.032793	0.96721	0.065586	0.18746	FALSE	102	129	35	37
ADAM19_22809_ATGCCTCTAATTGTACCCTG	ADAM19	497.73	531.86	0.095494	582.54	8191.8	0.37707	0.64694	0.35306	0.70612	0.83493	TRUE	657	514	330	434
ADAM19_22810_CCTCTAAATAATCAGCCACG	ADAM19	88.767	94.531	0.089788	16.617	822.45	0.201	0.57924	0.42076	0.84153	0.91875	TRUE	101	42	47	71
ADAM19_22811_GTCACGCTCAGCACTTGCCG	ADAM19	200.78	208.16	0.051804	27.214	2432.9	0.14957	0.55944	0.44056	0.88113	0.94057	TRUE	123	96	125	144
ADAM19_22812_TGCCCAGAGATGCGAAGTGT	ADAM19	302.23	333.25	0.1405	481.28	4200.1	0.47858	0.68388	0.31612	0.63223	0.78466	TRUE	278	293	183	225
ADAM2_6617_ATGTGTGATGCAAACTATGC	ADAM2	322.31	334.2	0.052116	70.724	4577.3	0.17578	0.56977	0.43023	0.86047	0.9297	TRUE	270	171	175	259
ADAM2_6618_CTTTAAATTACAAAGCGTAG	ADAM2	73.972	108.85	0.55116	613.99	646.2	1.3722	0.91484	0.085157	0.17031	0.35302	TRUE	132	125	79	61
ADAM2_6619_GACCTCCCTGAATATTGCAA	ADAM2	503.01	726.65	0.52978	25217	8308.6	2.4534	0.99293	0.0070747	0.014149	0.06391	TRUE	542	507	402	482
ADAM2_6620_TTGAAAAAAGGATCTAAGCG	ADAM2	401.56	483.16	0.26626	3336	6143.5	1.041	0.85106	0.14894	0.29787	0.50248	TRUE	362	305	278	331
ADAM20_22877_AATGTGACTGTGGAACCATA	ADAM20	827.43	761.02	-0.12055	2206.2	16211	0.52159	0.30098	0.69902	0.60195	0.76265	FALSE	633	523	462	652
ADAM20_22878_AGAGATACATTGTCCACATG	ADAM20	865.48	783.94	-0.14258	3326.2	17221	0.62133	0.26719	0.73281	0.53438	0.71351	FALSE	730	770	540	706
ADAM20_22879_GGTGTGTGTGCGAGCTACAG	ADAM20	403.68	330.38	-0.28828	2692.9	6186.9	0.93185	0.17571	0.82429	0.35141	0.55522	FALSE	533	512	327	357
ADAM20_22880_TAAGGGCAACCAAGGACTCA	ADAM20	811.58	874.65	0.10784	1989.5	15795	0.50183	0.69211	0.30789	0.61579	0.77289	TRUE	660	529	339	478
ADAM21_22873_ATATTCCTGCAACATAGGCT	ADAM21	576.98	731.42	0.34165	11967	9987.9	1.5453	0.93887	0.061135	0.12227	0.28423	TRUE	506	581	357	452
ADAM21_22874_GAAACACGTTGTTCATATGA	ADAM21	395.22	494.62	0.32291	4955	6013.9	1.2817	0.90002	0.099978	0.19996	0.3917	TRUE	396	344	234	317
ADAM21_22875_GCATAATCCTCCAAGATTGG	ADAM21	603.4	684.63	0.18193	3302.5	10607	0.78874	0.78487	0.21513	0.43026	0.62706	TRUE	465	545	489	533
ADAM21_22876_TGGGTTCAATTTCATAAGTG	ADAM21	555.85	375.26	-0.56556	16463	9500	1.8528	0.031955	0.96805	0.06391	0.18436	FALSE	595	626	532	582
ADAM22_39599_ATAGGTATTGGTATGTACAA	ADAM22	207.12	223.44	0.10888	133.13	2535.8	0.32398	0.62701	0.37299	0.74597	0.86056	TRUE	176	167	130	146
ADAM22_39600_CTTAGGTGAATGTAAATGCG	ADAM22	585.44	376.21	-0.63659	22153	10185	2.0732	0.019078	0.98092	0.038157	0.12984	FALSE	388	369	473	607
ADAM22_39601_TACTACCAGGGCCATATCCG	ADAM22	596.01	528.99	-0.17177	2247.4	10432	0.6561	0.25588	0.74412	0.51176	0.69578	FALSE	330	450	427	512
ADAM22_39602_TGTATTTCATAAACTCACGT	ADAM22	94.051	64.93	-0.52775	427.6	887.9	0.97726	0.16355	0.83645	0.3271	0.53197	FALSE	50	69	21	40
ADAM23_22869_ACATATAATCCAGAAAACCT	ADAM23	133.15	59.201	-1.156	2843.2	1408.3	1.9706	0.024198	0.9758	0.048395	0.15292	FALSE	225	133	90	116
ADAM23_22870_AGGCGTCAAAGACTCCAAGG	ADAM23	145.83	65.885	-1.1344	3318.3	1589.3	2.0054	0.022337	0.97766	0.044675	0.14468	FALSE	208	137	94	123
ADAM23_22871_ATATTACATCAACCAAGACT	ADAM23	247.28	142.27	-0.79318	5616.9	3212.3	1.8527	0.031957	0.96804	0.063914	0.18437	FALSE	380	390	177	269
ADAM23_22872_GGATACTTACAGAATCCACA	ADAM23	36.986	33.42	-0.14222	6.3626	259.43	0.2214	0.40596	0.59404	0.81191	0.90172	FALSE	13	40	3	0
ADAM28_29351_CATACTACTAGTTTGGTGGC	ADAM28	300.12	227.26	-0.39967	2667.1	4160.8	1.1295	0.12934	0.87066	0.25867	0.46028	FALSE	231	256	155	218
ADAM28_29352_TAAAAAGCTCAATACTCATG	ADAM28	453.34	338.02	-0.42242	6685.6	7227.6	1.3565	0.087467	0.91253	0.17493	0.359	FALSE	327	339	348	430
ADAM28_29353_TAGGCAATGGAGCATTAAAG	ADAM28	512.52	438.28	-0.22529	2760.2	8520	0.80432	0.2106	0.7894	0.42121	0.61849	FALSE	198	195	356	413
ADAM28_29354_TTAAGCCCCATACATCGGGA	ADAM28	681.6	308.42	-1.1415	72298	12492	3.3389	0.00042061	0.99958	0.00084121	0.0070214	FALSE	677	499	509	643
ADAM29_30079_ACTGCAAGTTCCTACCATCA	ADAM29	437.49	575.78	0.39547	9606.5	6890.9	1.6659	0.95213	0.04787	0.095739	0.24167	TRUE	269	326	251	285
ADAM29_30080_AGTCGGAGAACATTACGCCC	ADAM29	540	342.79	-0.65408	19693	9138.3	2.0629	0.01956	0.98044	0.03912	0.13211	FALSE	701	650	415	477
ADAM29_30081_GTATACCAGATGTTCAAACG	ADAM29	218.75	267.36	0.28833	1184.6	2727.4	0.93086	0.82403	0.17597	0.35193	0.55576	TRUE	171	154	151	166
ADAM29_30082_TTTGGGCATGAACCATGATG	ADAM29	511.47	468.84	-0.1253	909.09	8496.5	0.46248	0.32187	0.67813	0.64373	0.79238	FALSE	355	410	339	425
ADAM30_30075_AATACTGCCAATGTAGGGGT	ADAM30	168.02	183.33	0.1251	117.26	1918.9	0.3495	0.63662	0.36338	0.72676	0.84806	TRUE	106	194	37	73
ADAM30_30076_ATGTGGAAACAAAATTGTGG	ADAM30	61.291	113.63	0.87986	1401.6	504.13	2.331	0.99009	0.0099087	0.019817	0.081391	TRUE	140	40	39	47
ADAM30_30077_CCAAAGGACTGCAACTACAT	ADAM30	163.8	213.89	0.38291	1260.2	1854.9	1.1631	0.87759	0.12241	0.24481	0.44457	TRUE	216	165	61	84
ADAM30_30078_CCCCTTATGAGAATAAGGCG	ADAM30	62.348	109.81	0.8067	1148.5	515.63	2.0901	0.98164	0.01836	0.03672	0.12644	TRUE	55	66	40	76
ADAM32_65049_AAATCTCCGAAACCAGTCTG	ADAM32	463.91	402.95	-0.20278	1860.5	7454.3	0.70608	0.24007	0.75993	0.48014	0.67092	FALSE	429	418	472	568
ADAM32_65050_AACACTGCTCCCAAATAACG	ADAM32	217.69	98.351	-1.1383	7394.3	2709.8	2.2925	0.010924	0.98908	0.021847	0.08742	FALSE	159	219	151	210
ADAM32_65051_AAGCCTGAAAGAACAACCAA	ADAM32	191.27	212.93	0.15402	234.8	2280.5	0.45362	0.67494	0.32506	0.65012	0.79716	TRUE	239	255	176	194
ADAM32_65052_TACAATCAGGCGTTGAATGT	ADAM32	392.05	197.66	-0.98445	19438	5949.4	2.5203	0.0058624	0.99414	0.011725	0.055701	FALSE	198	148	252	371
ADAM33_51155_CACAGGGTGAGCCGTCCAGT	ADAM33	105.67	135.59	0.35663	449.19	1036.2	0.92933	0.82355	0.17645	0.3529	0.55672	TRUE	129	160	32	62
ADAM33_51156_CCCCCCACCCGCGTACCCGG	ADAM33	246.22	123.18	-0.99341	7792.3	3194	2.1772	0.014726	0.98527	0.029452	0.10848	FALSE	312	221	176	185
ADAM33_51157_CTCCATCCGAAAGATCTCGT	ADAM33	76.086	190.97	1.3164	6936.2	670.72	4.4361	1	4.5887e-06	9.1774e-06	0.00013188	TRUE	59	51	18	23
ADAM33_51158_GTGGGTTTCTATGTATCCTG	ADAM33	354.01	76.389	-2.1977	43683	5189.5	3.8538	5.7702e-05	0.99994	0.0001154	0.0012807	FALSE	398	406	383	509
ADAM7_22893_AAAGATCCTTAAAACACGGA	ADAM7	321.25	458.33	0.51135	9469.4	4557.3	2.0306	0.97885	0.021147	0.042295	0.13935	TRUE	299	395	177	225
ADAM7_22894_ACAGAATGGCACATCAACTG	ADAM7	775.65	820.22	0.080506	993.5	14862	0.36561	0.64267	0.35733	0.71466	0.8404	TRUE	715	537	512	631
ADAM7_22895_CATTTGCAAATACCTGAGCA	ADAM7	347.67	515.62	0.56725	14240	5065.5	2.3598	0.99086	0.0091419	0.018284	0.077015	TRUE	376	338	176	210
ADAM7_22896_CCATAAGATACCATGATCTG	ADAM7	439.61	342.79	-0.35795	4704.4	6935.6	1.1625	0.12252	0.87748	0.24504	0.44483	FALSE	412	381	243	337
ADAM8_257_AGTCCGGGTACCCCTCTACG	ADAM8	741.84	683.68	-0.11762	1691.9	13998	0.49156	0.31152	0.68848	0.62303	0.77797	FALSE	748	782	574	656
ADAM8_258_CAAACAGGTTCCCACACACG	ADAM8	168.02	175.69	0.064035	29.428	1918.9	0.17512	0.56948	0.43052	0.86104	0.92999	TRUE	192	131	119	148
ADAM8_259_CCACATACAGCTCCACGTAG	ADAM8	259.96	192.88	-0.42865	2262.2	3434.1	1.1447	0.12617	0.87383	0.25234	0.45305	FALSE	352	288	238	281
ADAM8_260_CCAGCTTAGACTCACCAAGT	ADAM8	152.17	169.97	0.15855	158.42	1681.8	0.43387	0.66778	0.33222	0.66445	0.80714	TRUE	92	129	78	91
ADAM9_22889_AAAAGTTTCTTATCACACGT	ADAM9	153.23	168.06	0.13243	109.98	1697.4	0.35988	0.6405	0.3595	0.71901	0.84338	TRUE	130	195	113	144
ADAM9_22890_GAATTGGACCCTTGCTGCGA	ADAM9	179.65	132.73	-0.4339	1107.1	2097.7	1.0245	0.15277	0.84723	0.30554	0.50977	FALSE	197	170	128	167
ADAM9_22891_GCTGTTCATTGTCGTAGACA	ADAM9	264.19	179.51	-0.5549	3618	3508.9	1.4294	0.076438	0.92356	0.15288	0.32952	FALSE	207	130	170	225
ADAM9_22892_TGTGGTTTATACTTACAACA	ADAM9	41.213	42.969	0.058783	1.5411	299.02	0.10152	0.53646	0.46354	0.92709	0.96546	TRUE	38	21	51	57
ADAMDEC1_35971_AATGTCTTACCACATTGAGT	ADAMDEC1	321.25	255.9	-0.32697	2142.1	4557.3	0.96803	0.16651	0.83349	0.33303	0.5376	FALSE	343	275	252	347
ADAMDEC1_35972_CGTCTTTACATCTAACCAGG	ADAMDEC1	92.994	62.066	-0.57571	483.11	874.71	1.0457	0.14713	0.85287	0.29427	0.49869	FALSE	97	75	69	99
ADAMDEC1_35973_GATGGCACAGTTCTAACCTG	ADAMDEC1	959.53	614.93	-0.64106	60102	19785	2.4499	0.0071451	0.99285	0.01429	0.064385	FALSE	690	769	713	866
ADAMDEC1_35974_TGATGTGTGAAGTATCCTCT	ADAMDEC1	349.78	336.11	-0.057359	93.485	5106.8	0.19133	0.42413	0.57587	0.84826	0.92266	FALSE	223	285	218	291
ADAMTS1_25049_CTATGTGGAAACCATGCTTG	ADAMTS1	292.72	301.74	0.043621	40.65	4024.3	0.14213	0.55651	0.44349	0.88698	0.94393	TRUE	307	374	198	299
ADAMTS1_25050_GAAAGCGGAGACCGAAGACG	ADAMTS1	231.43	264.5	0.19191	547.36	2940.4	0.60983	0.72901	0.27099	0.54198	0.71971	TRUE	188	61	88	102
ADAMTS1_25051_GAGGAGTCCAGTACACGATG	ADAMTS1	394.17	294.1	-0.42127	5033.8	5992.4	1.2927	0.098054	0.90195	0.19611	0.38687	FALSE	399	377	368	368
ADAMTS1_25052_GTAATCATGTAGGCACTGCA	ADAMTS1	889.78	524.22	-0.76216	67974	17875	2.7343	0.0031259	0.99687	0.0062518	0.034703	FALSE	643	643	549	721
ADAMTS10_51915_ATCGCGTCAGTGTAAATACG	ADAMTS10	535.77	534.72	-0.0028246	0.55114	9042.4	0.011041	0.4956	0.5044	0.99119	0.99582	FALSE	437	413	326	381
ADAMTS10_51916_GGCATGAACCATGACGGCGT	ADAMTS10	227.2	227.26	0.00035242	0.0015541	2868.9	0.0010409	0.50041	0.49959	0.99918	0.99958	TRUE	163	164	136	175
ADAMTS10_51917_TACAAGTGGAAAACGTACCG	ADAMTS10	312.8	364.76	0.22105	1351.9	4397.6	0.78353	0.78334	0.21666	0.43332	0.62952	TRUE	326	201	204	236
ADAMTS10_51918_TGCCATTCCAGAGAACGGTG	ADAMTS10	105.67	164.24	0.63131	1735.3	1036.2	1.8192	0.96554	0.034456	0.068912	0.19402	TRUE	91	34	97	109
ADAMTS12_51907_AACATCATAGATCACTCCGG	ADAMTS12	50.724	125.09	1.2855	2900.7	392.87	3.7517	0.99991	8.8274e-05	0.00017655	0.0018546	TRUE	23	55	14	11
ADAMTS12_51908_AATGCCACCGAGGATCGCTG	ADAMTS12	114.13	144.18	0.33463	453.19	1147.6	0.88721	0.81245	0.18755	0.37511	0.57736	TRUE	60	67	75	79
ADAMTS12_51909_GTACTACAGAATTTCTCACG	ADAMTS12	304.34	169.97	-0.83673	9217.5	4239.4	2.0639	0.019514	0.98049	0.039029	0.13189	FALSE	288	283	263	323
ADAMTS12_51910_TTGGTGCCTCTGAGCGACAG	ADAMTS12	176.48	357.12	1.0128	16811	2048.6	3.9911	0.99997	3.2886e-05	6.5773e-05	0.00078217	TRUE	135	163	115	143
ADAMTS13_30091_AGCACCACACTCACTAGGGA	ADAMTS13	314.91	406.77	0.36824	4236.3	4437.4	1.379	0.91605	0.083949	0.1679	0.34973	TRUE	285	261	229	252
ADAMTS13_30092_CATGGGCGCTGGTCTAGCTG	ADAMTS13	84.54	183.33	1.1076	5058.1	771.01	3.5579	0.99981	0.00018712	0.00037424	0.0035417	TRUE	109	85	15	30
ADAMTS13_30093_GGCAACTCCAGGTCAAACCT	ADAMTS13	411.07	283.59	-0.53401	8195.3	6339.2	1.6011	0.054672	0.94533	0.10934	0.2641	FALSE	403	423	293	364
ADAMTS13_30094_TGGTCGTGTCGAGTACAGAG	ADAMTS13	440.66	421.09	-0.065388	191.53	6957.9	0.23462	0.40725	0.59275	0.8145	0.90278	FALSE	463	375	292	404
ADAMTS14_60965_CAGACCTGGTACTCGAACAT	ADAMTS14	87.71	178.56	1.0173	4254.2	809.51	3.1931	0.9993	0.0007046	0.0014092	0.010693	TRUE	54	54	19	26
ADAMTS14_60966_CAGGAGTGTGTGTACACTGG	ADAMTS14	469.2	206.25	-1.1819	35989	7568.4	3.0225	0.0012534	0.99875	0.0025069	0.016955	FALSE	396	312	307	368
ADAMTS14_60967_GGTCTCATGAGCTATCACGA	ADAMTS14	46.497	160.42	1.7649	7071.7	350.37	6.086	1	5.8263e-10	1.1653e-09	2.9327e-08	TRUE	45	39	3	2
ADAMTS14_60968_TGACCTTTGAAGCACCACTG	ADAMTS14	386.77	249.22	-0.63201	9573.4	5842.3	1.7996	0.035963	0.96404	0.071925	0.1998	FALSE	232	225	261	337
ADAMTS15_64209_AGCGTTTCGTGTCTATCCCG	ADAMTS15	298	212.93	-0.483	3643.8	4121.7	1.3251	0.092575	0.90743	0.18515	0.37282	FALSE	349	335	280	328
ADAMTS15_64210_CAACCCCATCAACATCGTTG	ADAMTS15	1075.8	905.21	-0.2488	14573	23077	1.1228	0.13076	0.86924	0.26153	0.46331	FALSE	575	767	681	796
ADAMTS15_64211_CATGGGGCATGTTGAACACG	ADAMTS15	1719.3	1189.8	-0.53081	141410	43409	2.5418	0.0055147	0.99449	0.011029	0.053227	FALSE	1157	1285	1112	1393
ADAMTS15_64212_GCGACGCTGCTTCTATTCTG	ADAMTS15	486.1	444.01	-0.13039	886.42	7936.3	0.47252	0.31828	0.68172	0.63656	0.78782	FALSE	577	593	370	482
ADAMTS16_64213_AAGAAGACCAGTCCGACCAG	ADAMTS16	268.41	579.6	1.1077	50167	3584.1	5.1979	1	1.0077e-07	2.0155e-07	3.8481e-06	TRUE	405	447	173	186
ADAMTS16_64214_AGATGGGACTCCATGCTCGG	ADAMTS16	203.95	195.75	-0.058953	33.674	2484.2	0.16464	0.4346	0.5654	0.8692	0.93403	FALSE	245	290	127	150
ADAMTS16_64215_GGGACACGTAATCGCCCCTG	ADAMTS16	187.04	240.62	0.36169	1441.1	2213.6	1.1388	0.87261	0.12739	0.25478	0.45608	TRUE	204	248	184	222
ADAMTS16_64216_GTTGAGTATCGTGAGCACGT	ADAMTS16	563.25	250.17	-1.1676	50970	9670	3.1837	0.00072702	0.99927	0.001454	0.010983	FALSE	252	352	455	581
ADAMTS17_64217_AGAAAAGAAGAAGCCGACGT	ADAMTS17	168.02	371.44	1.1398	21482	1918.9	4.6436	1	1.7117e-06	3.4233e-06	5.3373e-05	TRUE	276	282	67	87
ADAMTS17_64218_AGTAGAAGCACAGCTCGGCG	ADAMTS17	429.04	382.9	-0.16374	1065.4	6713.1	0.56315	0.28667	0.71333	0.57333	0.7431	FALSE	521	524	291	361
ADAMTS17_64219_GAGACTGATCTCTGCGTGCA	ADAMTS17	1218.4	888.97	-0.45437	54606	27290	1.9943	0.023057	0.97694	0.046115	0.1478	FALSE	1197	1069	975	1135
ADAMTS17_64220_GCATGTGCAGCCGAACATGT	ADAMTS17	765.09	673.18	-0.18438	4228	14591	0.76089	0.22336	0.77664	0.44672	0.64175	FALSE	653	611	503	663
ADAMTS18_64221_AGGCCAGTGCGTAAAGTTTG	ADAMTS18	512.52	444.01	-0.20659	2350	8520	0.74226	0.22897	0.77103	0.45793	0.6523	FALSE	406	398	321	359
ADAMTS18_64222_CCGAAGTTGTACCATCAATG	ADAMTS18	594.95	599.65	0.01134	11.058	10408	0.046097	0.51838	0.48162	0.96323	0.98234	TRUE	697	810	501	598
ADAMTS18_64223_GTGACTGCTCAAAATCGCCG	ADAMTS18	452.29	301.74	-0.58237	11448	7205	1.7737	0.03806	0.96194	0.076119	0.20734	FALSE	527	458	382	504
ADAMTS18_64224_TATTGGAAGTGACATAAACG	ADAMTS18	357.18	327.52	-0.12472	440.18	5251.8	0.40933	0.34115	0.65885	0.6823	0.81956	FALSE	440	507	276	311
ADAMTS19_64257_ATGCAGCTATACTTATAACA	ADAMTS19	183.87	48.698	-1.8953	10073	2163.7	2.906	0.0017917	0.99821	0.0035834	0.02251	FALSE	154	87	136	155
ADAMTS19_64258_CCACTGAAGTATATGCTTTG	ADAMTS19	159.57	154.69	-0.044542	11.916	1791.5	0.11534	0.45404	0.54596	0.90809	0.95577	FALSE	192	166	68	82
ADAMTS19_64259_GACCATCAGCACACGATGGG	ADAMTS19	1629.5	1535.4	-0.085752	4427.6	40379	0.46824	0.31981	0.68019	0.63961	0.78982	FALSE	1100	1197	1032	1164
ADAMTS19_64260_TCTGCCTATATACACGGTGT	ADAMTS19	368.81	422.05	0.19406	1419	5481.9	0.71911	0.76396	0.23604	0.47207	0.66406	TRUE	319	361	223	262
ADAMTS2_25045_AGCACGCCAACAGCTCGAGG	ADAMTS2	736.55	557.64	-0.40083	16083	13864	1.5195	0.064317	0.93568	0.12863	0.29459	FALSE	758	643	415	575
ADAMTS2_25046_CCTGACATCCTCAAACGGGA	ADAMTS2	322.31	388.63	0.26919	2204	4577.3	0.98025	0.83652	0.16348	0.32696	0.53181	TRUE	250	342	146	176
ADAMTS2_25047_CGTGATCGTGGTATTCATCG	ADAMTS2	627.71	632.12	0.010081	9.7184	11184	0.041688	0.51663	0.48337	0.96675	0.98402	TRUE	631	430	393	570
ADAMTS2_25048_GAGCTTCCCCGGAGGCAACG	ADAMTS2	611.86	647.39	0.081322	631.59	10807	0.34186	0.63377	0.36623	0.73246	0.85157	TRUE	591	589	469	438
ADAMTS20_50679_AGTGAATGTTCATCCCAATG	ADAMTS20	126.81	158.51	0.31962	503.9	1319.9	0.87247	0.80848	0.19152	0.38304	0.58475	TRUE	65	91	86	81
ADAMTS20_50680_GCCTCCGCATAAGCTGACGA	ADAMTS20	86.653	217.71	1.3191	9026.9	796.63	4.6433	1	1.7164e-06	3.4329e-06	5.3511e-05	TRUE	86	53	33	31
ADAMTS20_50681_GGCTGCTAGTGAATGGAGCG	ADAMTS20	304.34	180.47	-0.75071	7801.9	4239.4	1.9025	0.028549	0.97145	0.057098	0.17114	FALSE	246	239	247	232
ADAMTS20_50682_GTGGCATTCCCTCTAATGTG	ADAMTS20	224.03	131.77	-0.76119	4329.9	2815.7	1.7387	0.041033	0.95897	0.082065	0.21828	FALSE	210	230	198	233
ADAMTS3_25041_CCACATTTATATGCACTCCG	ADAMTS3	187.04	136.54	-0.45117	1282.9	2213.6	1.0733	0.14153	0.85847	0.28305	0.48698	FALSE	179	230	172	186
ADAMTS3_25042_TGGCTATAAAATGTGCACCG	ADAMTS3	78.199	66.84	-0.22335	64.614	695.46	0.43074	0.33232	0.66768	0.66464	0.80724	FALSE	33	37	22	46
ADAMTS3_25043_TGTGGTGATGAGACTGCTAT	ADAMTS3	473.42	253.99	-0.89572	24649	7659.9	2.5072	0.006085	0.99392	0.01217	0.057219	FALSE	402	413	306	412
ADAMTS3_25044_TGTGTTAATCCAAGAAGACG	ADAMTS3	179.65	183.33	0.02914	6.793	2097.7	0.080476	0.53205	0.46795	0.9359	0.96968	TRUE	128	122	127	121
ADAMTS4_25037_AGCGCTTTAGCCCCGCACCG	ADAMTS4	734.44	627.34	-0.22706	5743.8	13811	0.91132	0.18106	0.81894	0.36213	0.56537	FALSE	660	630	511	611
ADAMTS4_25038_AGGGGCCATGACATGGCGAG	ADAMTS4	242	497.48	1.0366	33673	3121	4.5732	1	2.4013e-06	4.8025e-06	7.2995e-05	TRUE	198	214	119	127
ADAMTS4_25039_CATACCCAGCGTGTCGCAAG	ADAMTS4	262.07	449.74	0.77683	17926	3471.5	3.1851	0.99928	0.00072345	0.0014469	0.010938	TRUE	177	178	142	177
ADAMTS4_25040_CCAGACCAAACACTCGCCCT	ADAMTS4	232.48	371.44	0.67368	9785.5	2958.3	2.5548	0.99469	0.0053128	0.010626	0.051786	TRUE	123	159	98	116
ADAMTS5_30103_AACATCGACCAACTCTACTC	ADAMTS5	664.69	411.54	-0.69031	32498	12078	2.3035	0.010626	0.98937	0.021253	0.085617	FALSE	283	359	487	644
ADAMTS5_30104_CTGCACGTCTACACCCGCGA	ADAMTS5	254.68	316.06	0.31043	1889.4	3341.2	1.0619	0.85586	0.14414	0.28828	0.49279	TRUE	187	175	138	162
ADAMTS5_30105_CTGCTTCTATCGGGGCACAG	ADAMTS5	97.221	154.69	0.66455	1673.2	927.77	1.8867	0.97038	0.029624	0.059247	0.17535	TRUE	110	68	48	57
ADAMTS5_30106_TGTGCTGTGATTGAAGACGA	ADAMTS5	606.57	567.19	-0.096694	775.88	10681	0.3811	0.35157	0.64843	0.70313	0.83282	FALSE	372	460	397	468
ADAMTS6_30371_AGCATCATACACCTGACCTG	ADAMTS6	243.05	275	0.17748	510.81	3139.2	0.5702	0.71573	0.28427	0.56854	0.74001	TRUE	333	247	159	166
ADAMTS6_30372_TAATAAGAACTGCATTATCG	ADAMTS6	107.79	87.847	-0.29213	199.34	1063.8	0.6114	0.27012	0.72988	0.54024	0.71846	FALSE	145	119	53	60
ADAMTS6_30373_TGGCCCCAGAGCATAGATGG	ADAMTS6	923.6	562.41	-0.71463	66220	18795	2.6346	0.0042119	0.99579	0.0084238	0.043509	FALSE	295	336	367	512
ADAMTS6_30374_TTAGACAACTGTCATTACAC	ADAMTS6	212.41	219.62	0.047945	26.004	2622.5	0.14082	0.55599	0.44401	0.88803	0.94454	TRUE	109	167	96	151
ADAMTS7_30367_GAAAAGCATCAACATGAAGG	ADAMTS7	200.78	570.05	1.5008	72615	2432.9	7.4866	1	3.5344e-14	7.0688e-14	2.5604e-12	TRUE	366	390	163	197
ADAMTS7_30368_GCCCGTAGGACAGATCCTCG	ADAMTS7	85.597	172.83	1.0053	3919.6	783.79	3.1159	0.99908	0.00091803	0.0018361	0.013209	TRUE	62	96	26	48
ADAMTS7_30369_GGACGCCAGGTGGCACCGAG	ADAMTS7	53.894	29.601	-0.84309	301.58	425.52	1.1777	0.11549	0.88451	0.23097	0.42848	FALSE	21	14	38	43
ADAMTS7_30370_TTCTACGAGCTACAATACCG	ADAMTS7	91.937	229.17	1.3084	9889.6	861.57	4.6752	1	1.4695e-06	2.939e-06	4.6496e-05	TRUE	84	131	54	75
ADAMTS8_30099_AAACCGCTTGGTCCTACTCG	ADAMTS8	284.27	360.94	0.34343	2949.7	3869.7	1.2325	0.89112	0.10888	0.21775	0.41294	TRUE	312	339	206	216
ADAMTS8_30100_AAGGACCCCGAGCCTCAGAA	ADAMTS8	445.95	451.65	0.018286	16.25	7070	0.067801	0.52703	0.47297	0.94594	0.97427	TRUE	445	519	284	354
ADAMTS8_30101_CCACCCAGAGCACTACGACA	ADAMTS8	356.12	275.95	-0.36678	3226.6	5231	1.1085	0.13383	0.86617	0.26767	0.47035	FALSE	412	464	295	295
ADAMTS8_30102_TTCAAGATCGAGCGCCTCGG	ADAMTS8	515.69	635.94	0.30184	7249	8590.8	1.2973	0.90274	0.097262	0.19452	0.38479	TRUE	384	420	302	410
ADAMTS9_44819_ACTGAAAGGTAACTCACACA	ADAMTS9	378.32	319.88	-0.24137	1710.5	5671.9	0.77594	0.21889	0.78111	0.43778	0.63407	FALSE	259	298	234	238
ADAMTS9_44820_AGCCCGGAGAGATAAATGTG	ADAMTS9	170.14	317.97	0.89827	11190	1951.1	3.3468	0.99959	0.00040883	0.00081766	0.0068551	TRUE	218	207	106	145
ADAMTS9_44821_CTGCGCCTATAAATGATGTG	ADAMTS9	380.43	250.17	-0.60273	8575.7	5714.4	1.7231	0.042434	0.95757	0.084869	0.2233	FALSE	526	577	318	416
ADAMTS9_44822_TGAAAGAATAGCGTACATCG	ADAMTS9	339.22	293.14	-0.20994	1062.8	4901.4	0.65811	0.25523	0.74477	0.51047	0.69514	FALSE	330	340	264	321
ADAMTSL1_56393_AGGTGCTAGTTCAACAACCA	ADAMTSL1	121.53	91.667	-0.40297	448	1247.3	0.84545	0.1987	0.8013	0.39739	0.59781	FALSE	125	179	75	96
ADAMTSL1_56394_CAGCTCGACGCACGTCACGG	ADAMTSL1	82.426	267.36	1.6856	18497	745.61	6.7727	1	6.3287e-12	1.2657e-11	3.8289e-10	TRUE	153	116	30	51
ADAMTSL1_56395_TGGAATTGACAACCGTTGAG	ADAMTSL1	185.99	384.81	1.0449	20403	2196.9	4.2418	0.99999	1.1085e-05	2.217e-05	0.00029409	TRUE	201	215	111	135
ADAMTSL1_56396_TGTATGACTGGGAGTATGAG	ADAMTSL1	207.12	159.46	-0.37521	1140.6	2535.8	0.94646	0.17194	0.82806	0.34388	0.54814	FALSE	259	161	99	127
ADAMTSL2_25725_CGTACGCAGACATGACCCCT	ADAMTSL2	358.24	369.53	0.044655	63.771	5272.6	0.15552	0.5618	0.4382	0.87641	0.93796	TRUE	300	318	219	255
ADAMTSL2_25726_CGTCCGCCCGTTGTACACGT	ADAMTSL2	97.221	182.38	0.90072	3714	927.77	2.7958	0.99741	0.0025906	0.0051812	0.030057	TRUE	111	104	45	44
ADAMTSL2_25727_GACCGGAATCGAGTACATCG	ADAMTSL2	149	161.37	0.11432	76.536	1635.4	0.30588	0.62011	0.37989	0.75978	0.86933	TRUE	123	107	99	99
ADAMTSL2_25728_TGACGGGCAACTATCGCAAG	ADAMTSL2	169.08	286.46	0.75714	7007	1935	2.6684	0.99619	0.0038112	0.0076225	0.040252	TRUE	174	184	77	99
ADAMTSL3_45243_ATTTCTGGAATCGTCGCACG	ADAMTSL3	171.19	265.45	0.62984	4495.2	1967.3	2.1251	0.98321	0.016789	0.033578	0.11891	TRUE	107	138	95	89
ADAMTSL3_45244_CCAAACTATTGGCTTCGCTG	ADAMTSL3	195.5	214.84	0.13547	187.22	2347.9	0.39924	0.65513	0.34487	0.68974	0.82421	TRUE	226	239	188	258
ADAMTSL3_45245_CCTTGCACAGCAACATGCGT	ADAMTSL3	163.8	122.22	-0.41942	868.8	1854.9	0.96529	0.16714	0.83286	0.33428	0.53879	FALSE	152	133	83	90
ADAMTSL3_45246_GCAGCAGGATCATTATATCG	ADAMTSL3	165.91	173.78	0.066511	31.012	1886.9	0.18129	0.5719	0.4281	0.85619	0.92727	TRUE	124	213	68	70
ADAMTSL4_40103_AGGACGGTTATATCGAAAGA	ADAMTSL4	412.13	644.53	0.64388	27339	6361	2.9139	0.99822	0.0017849	0.0035699	0.022443	TRUE	366	346	230	257
ADAMTSL4_40104_CCTTCTCCTAAGGAGTGCGT	ADAMTSL4	576.98	356.16	-0.69445	24732	9987.9	2.2096	0.013568	0.98643	0.027136	0.10224	FALSE	523	528	372	553
ADAMTSL4_40105_GCTGCGTACTGGAAACGAGT	ADAMTSL4	257.85	300.78	0.2214	923.04	3396.9	0.73665	0.76933	0.23067	0.46134	0.65515	TRUE	151	107	135	178
ADAMTSL4_40106_GGGGGCCCCCTCGGTCAGTG	ADAMTSL4	391	592.97	0.59954	20616	5928	2.6232	0.99564	0.004355	0.00871	0.04467	TRUE	457	447	224	242
ADAMTSL5_68925_AGAACTCAAACTCGATGCCA	ADAMTSL5	121.53	285.5	1.2255	14038	1247.3	4.6429	1	1.7182e-06	3.4364e-06	5.3544e-05	TRUE	120	124	80	95
ADAMTSL5_68926_GCACACTGTAGGTCTCGGAA	ADAMTSL5	482.93	462.15	-0.063324	215.97	7866.9	0.2343	0.40737	0.59263	0.81475	0.90283	FALSE	394	356	301	410
ADAMTSL5_68927_GGATGTGTCTGGCGCCCTCG	ADAMTSL5	355.07	232.99	-0.60573	7534	5210.3	1.6913	0.045389	0.95461	0.090779	0.23331	FALSE	307	271	277	307
ADAMTSL5_68928_TGGTCTACACCCGAGACACA	ADAMTSL5	310.68	252.08	-0.30047	1721.7	4357.9	0.8877	0.18735	0.81265	0.3747	0.57703	FALSE	263	274	140	121
ADAP1_29907_CAGGTGCTCGATCTTCATCA	ADAP1	180.7	77.344	-1.2137	5574.7	2114.2	2.2479	0.012248	0.98775	0.024496	0.095084	FALSE	119	180	129	151
ADAP1_29908_GCTTCCAGAGAAAACCCTCA	ADAP1	46.497	180.47	1.9338	9929.5	350.37	7.1572	1	4.1425e-13	8.285e-13	2.7607e-11	TRUE	94	40	20	20
ADAP1_29909_GTGGGCCGGTAGTAGAAGGA	ADAP1	672.09	594.88	-0.17579	2983.8	12259	0.69739	0.24278	0.75722	0.48556	0.67493	FALSE	869	934	561	691
ADAP1_29910_GTTTGTGCTGACAGAACGAG	ADAP1	105.67	235.85	1.1508	8804.8	1036.2	4.044	0.99997	2.629e-05	5.258e-05	0.00064023	TRUE	160	142	96	103
ADAP2_43431_CCTCCTGAAGTACTTCACAA	ADAP2	124.7	190.97	0.61095	2221	1290.7	1.8447	0.96745	0.032546	0.065092	0.18651	TRUE	102	132	79	74
ADAP2_43432_CTGGGACGACAGTATTGTGG	ADAP2	452.29	213.89	-1.0768	29390	7205	2.8086	0.0024879	0.99751	0.0049759	0.029163	FALSE	353	301	309	364
ADAP2_43433_TGATGTCAGGGAAGTTACGG	ADAP2	252.56	176.65	-0.51331	2904.3	3304.3	1.3206	0.093306	0.90669	0.18661	0.37477	FALSE	211	184	159	192
ADAP2_43434_TGTTTGTGTATCATGAAAGT	ADAP2	61.291	104.08	0.75438	931.24	504.13	1.9057	0.97157	0.028435	0.056869	0.17064	TRUE	127	128	48	76
ADAR_265_AGGCAATCAACACCTCTCTG	ADAR	99.334	204.34	1.0332	5688.3	954.59	3.3986	0.99966	0.00033884	0.00067768	0.0058687	TRUE	108	54	34	52
ADAR_266_CGTTCTCCCCAATCAAGACA	ADAR	152.17	153.73	0.014625	1.2179	1681.8	0.038056	0.51513	0.48487	0.96974	0.98547	TRUE	64	81	73	104
ADAR_267_GTGCATACACTCAAGCAGTG	ADAR	237.77	324.65	0.44772	3797.2	3048.4	1.5736	0.94221	0.057787	0.11557	0.27364	TRUE	281	299	137	179
ADAR_268_TTCTTGTAGGGTGAACACCG	ADAR	170.14	268.32	0.65415	4881.5	1951.1	2.2227	0.98688	0.01312	0.026239	0.099813	TRUE	113	98	106	142
ADARB1_269_GGTGAATACATGAGTGATCG	ADARB1	444.89	368.58	-0.27082	2918.4	7047.5	0.90906	0.18166	0.81834	0.36332	0.56648	FALSE	588	656	428	517
ADARB1_270_TCAGGTCACCAAACTTACCC	ADARB1	232.48	268.32	0.20597	642.75	2958.3	0.65877	0.74498	0.25502	0.51005	0.69491	TRUE	126	207	154	155
ADARB1_271_TTCAGAAATCAGAGCGAGGG	ADARB1	730.21	1082.8	0.56775	62762	13704	3.012	0.9987	0.0012976	0.0025951	0.017432	TRUE	1030	976	581	615
ADARB1_272_TTGGAGCCCACGTAAAAGGG	ADARB1	1221.6	583.42	-1.0649	210430	27385	3.8564	5.7527e-05	0.99994	0.00011505	0.0012772	FALSE	728	678	979	1102
ADARB2_273_CAGAGCGATCGATATTCGTG	ADARB2	239.88	284.55	0.24541	999.36	3084.6	0.80423	0.78937	0.21063	0.42127	0.61854	TRUE	235	280	151	181
ADARB2_274_GGCGTTGGGGAACTGCACGA	ADARB2	300.12	320.83	0.09599	214.64	4160.8	0.32116	0.62596	0.37404	0.74809	0.86205	TRUE	375	341	215	202
ADARB2_275_GTGGACGGCAGGACGTTCGA	ADARB2	773.54	655.03	-0.23957	7033.9	14808	0.97386	0.16506	0.83494	0.33013	0.53487	FALSE	675	532	519	594
ADARB2_276_TCCTGGCATCACAAACACGG	ADARB2	163.8	133.68	-0.29114	454.64	1854.9	0.69924	0.24215	0.75785	0.48429	0.67393	FALSE	120	145	77	83
ADAT1_33087_ATGCTGAGGTCATAGCCAGA	ADAT1	485.05	622.57	0.35945	9492.7	7913.1	1.5459	0.93894	0.061059	0.12212	0.28402	TRUE	382	383	281	312
ADAT1_33088_CTATCACTTTGGCACTACCA	ADAT1	402.62	327.52	-0.29703	2827.8	6165.2	0.95651	0.16941	0.83059	0.33881	0.54318	FALSE	298	156	263	291
ADAT1_33089_GCATCCGAGGACGTTCCATC	ADAT1	101.45	216.75	1.0878	6881.2	981.6	3.6803	0.99988	0.00011656	0.00023312	0.0023614	TRUE	163	92	41	39
ADAT1_33090_GTGGACATTATTGGCAGCGG	ADAT1	176.48	92.621	-0.92272	3605.5	2048.6	1.8527	0.031915	0.96809	0.06383	0.18422	FALSE	207	136	154	253
ADAT2_60293_CACTTTGACGACACCAATCG	ADAT2	880.27	561.46	-0.64784	51458	17618	2.4019	0.0081551	0.99184	0.01631	0.07098	FALSE	572	492	529	656
ADAT2_60294_GCAGCTGCACACATAATGCA	ADAT2	25.362	581.51	4.4658	220780	158.36	44.194	1	0	0	0	TRUE	121	104	5	13
ADAT2_60295_GGAGACCGAAAAGTGGATGG	ADAT2	374.09	369.53	-0.017639	10.388	5587.3	0.06098	0.47569	0.52431	0.95137	0.97692	FALSE	494	514	284	315
ADAT2_60296_TGACAGCCATATACAACCAG	ADAT2	75.029	295.05	1.9612	26830	658.43	8.5745	1	4.9825e-18	9.9649e-18	4.7285e-16	TRUE	183	189	58	78
ADAT3_56949_CCCACACCGCCCGCTCCATG	ADAT3	463.91	465.02	0.0034225	0.60966	7454.3	0.01279	0.5051	0.4949	0.9898	0.99512	TRUE	537	390	354	314
ADAT3_56950_CGAGGCCGGGTCCACTACCA	ADAT3	362.46	249.22	-0.53863	6468.2	5356.1	1.5474	0.060884	0.93912	0.12177	0.28346	FALSE	324	303	237	315
ADAT3_56951_GCTTCTCGGACAGGACAGGG	ADAT3	88.767	118.4	0.41158	441.4	822.45	1.0334	0.84914	0.15086	0.30172	0.50623	TRUE	157	118	47	61
ADAT3_56952_TTGTCCTCGTGGAAGGACGT	ADAT3	623.48	777.26	0.31759	11859	11083	1.4607	0.92795	0.072052	0.1441	0.31742	TRUE	438	423	401	494
ADCK1_45107_GAGTGTCCCTTATGGCTCAG	ADCK1	358.24	182.38	-0.97012	15895	5272.6	2.4219	0.0077199	0.99228	0.01544	0.068184	FALSE	259	388	272	324
ADCK1_45108_GCTTCGATGACACCCCTCTG	ADCK1	228.26	194.79	-0.22765	560.87	2886.8	0.62288	0.26668	0.73332	0.53335	0.71274	FALSE	247	181	129	184
ADCK1_45109_GGTGCGGAAGCACCCCGGCA	ADCK1	97.221	80.208	-0.2744	145.05	927.77	0.55854	0.28774	0.71226	0.57547	0.7432	FALSE	121	159	82	85
ADCK1_45110_TTTCAGATCTCACGCCACCT	ADCK1	358.24	377.17	0.074095	179.24	5272.6	0.26072	0.60285	0.39715	0.79431	0.89078	TRUE	267	233	187	241
ADCK2_55683_CCTCCGAAAACAGATCGCGC	ADCK2	365.63	428.73	0.22909	1993.8	5418.9	0.85715	0.80432	0.19568	0.39136	0.59247	TRUE	253	367	303	314
ADCK2_55684_CCTGGTTGGATCAAATGCAG	ADCK2	356.12	386.72	0.11858	468.2	5231	0.423	0.66385	0.33615	0.67229	0.81248	TRUE	447	365	311	321
ADCK2_55685_GGCGTATGCTTTGTACACCT	ADCK2	455.46	444.01	-0.036647	65.539	7272.8	0.13425	0.4466	0.5534	0.89321	0.94734	FALSE	595	454	272	293
ADCK2_55686_TTCGCCGACTCAGAACGTCA	ADCK2	666.81	278.82	-1.2549	78732	12130	3.5229	0.00021344	0.99979	0.00042689	0.0039586	FALSE	457	455	541	685
ADCK3_44811_CCGAATGAAGGGCGGCCGCG	ADCK3	261.02	220.57	-0.24188	819.31	3452.8	0.68829	0.24563	0.75437	0.49126	0.67997	FALSE	148	179	191	218
ADCK3_44812_CCTGGCTAAGATCTTCGAGC	ADCK3	231.43	314.15	0.43925	3441.3	2940.4	1.5255	0.93643	0.063568	0.12714	0.29217	TRUE	218	237	187	194
ADCK3_44813_CCTGGGTCATGCCCACAGCG	ADCK3	224.03	193.84	-0.20786	456.44	2815.7	0.56903	0.28466	0.71534	0.56932	0.7406	FALSE	322	216	177	207
ADCK3_44814_TGTCCGAGGCCAATGCAGAG	ADCK3	228.26	433.51	0.92241	21596	2886.8	3.8201	0.99993	6.67e-05	0.0001334	0.0014515	TRUE	167	116	133	145
ADCK4_50403_GCACCTTGCGTTCTCGAGAG	ADCK4	272.64	120.31	-1.1736	12074	3659.7	2.518	0.0058978	0.9941	0.011796	0.055944	FALSE	261	173	247	323
ADCK4_50404_GGAGTGTGACTACCGTCGTG	ADCK4	530.49	500.35	-0.084228	454.34	8923	0.31908	0.37483	0.62517	0.74966	0.86302	FALSE	394	455	248	319
ADCK4_50405_TAAGGTCTGCACAATCCGCT	ADCK4	140.55	209.11	0.56989	2373.7	1513.2	1.7627	0.96101	0.038985	0.07797	0.21086	TRUE	113	180	70	111
ADCK4_50406_TTAAGGAGCTGTGCACGACA	ADCK4	402.62	347.57	-0.21156	1517.4	6165.2	0.70113	0.24161	0.75839	0.48322	0.67324	FALSE	312	342	234	320
ADCK5_65021_CACCCCTCGAAGGACAACAT	ADCK5	1044.1	632.12	-0.72305	86173	22166	2.767	0.0028291	0.99717	0.0056582	0.032148	FALSE	860	671	723	934
ADCK5_65022_CGCGGGGCACCACGACGTAG	ADCK5	1270.2	779.17	-0.70435	122340	28863	2.8903	0.0019241	0.99808	0.0038482	0.023871	FALSE	1011	963	884	1063
ADCK5_65023_GTGCCTCTGCCATGACATAG	ADCK5	926.77	901.39	-0.040017	322.1	18881	0.18471	0.42673	0.57327	0.85346	0.92589	FALSE	705	733	536	720
ADCK5_65024_TGCCAGGATGTGGGTCCGAG	ADCK5	487.16	405.82	-0.26298	3315.4	7959.4	0.91179	0.18094	0.81906	0.36188	0.56515	FALSE	380	384	289	381
ADCY1_277_AACCGGGTTACGGACATGAG	ADCY1	406.85	433.51	0.091345	355.42	6252	0.33715	0.632	0.368	0.73601	0.85393	TRUE	580	410	342	470
ADCY1_278_CATGTTCAGATCCACCTCGG	ADCY1	254.68	522.31	1.0333	36943	3341.2	4.63	1	1.828e-06	3.656e-06	5.6704e-05	TRUE	189	272	195	199
ADCY1_279_CCCAGACGAAAGGACCACCA	ADCY1	679.49	518.49	-0.38948	13020	12440	1.4435	0.074443	0.92556	0.14889	0.32419	FALSE	571	472	407	466
ADCY1_280_CGGGGTGGTGTAGACAACGT	ADCY1	267.36	342.79	0.35739	2856.3	3565.3	1.2634	0.89678	0.10322	0.20645	0.3997	TRUE	348	290	222	272
ADCY10_43455_AATGCTTACCTATCTTGACT	ADCY10	476.59	418.23	-0.18805	1705	7728.8	0.66389	0.25338	0.74662	0.50676	0.69229	FALSE	500	429	299	387
ADCY10_43456_AGAAAACAGCCTACGAGCTG	ADCY10	663.64	880.38	0.4072	23606	12052	1.9743	0.97583	0.024174	0.048348	0.15283	TRUE	598	597	356	453
ADCY10_43457_GCACAGGGAATGTTAACGAA	ADCY10	413.19	474.57	0.19936	1885.8	6382.9	0.76824	0.77883	0.22117	0.44235	0.63805	TRUE	294	420	257	298
ADCY10_43458_TCACAAACACAATCGTCACT	ADCY10	591.78	630.21	0.09062	738.55	10333	0.37804	0.6473	0.3527	0.7054	0.83442	TRUE	428	590	377	492
ADCY2_281_ACTCCAAGTACCGGGTCATG	ADCY2	451.23	346.61	-0.37957	5496.1	7182.5	1.2344	0.10852	0.89148	0.21704	0.41234	FALSE	591	549	362	419
ADCY2_282_CAGGCAGACGCTAAGCACGA	ADCY2	349.78	484.11	0.46774	9081.6	5106.8	1.8798	0.96993	0.030071	0.060142	0.17716	TRUE	264	290	196	181
ADCY2_283_CCTGTAATTGCATCAAGTCG	ADCY2	309.63	444.01	0.51865	9102.2	4338.1	2.0403	0.97934	0.02066	0.04132	0.13726	TRUE	308	327	207	220
ADCY2_284_TGAAGCGGCATACAAACGTG	ADCY2	228.26	349.48	0.61236	7429.9	2886.8	2.2562	0.98797	0.01203	0.02406	0.093767	TRUE	165	169	166	227
ADCY3_285_AGCTGTCTCCAGTACTACAC	ADCY3	423.76	384.81	-0.13875	758.9	6602.5	0.47932	0.31586	0.68414	0.63171	0.7844	FALSE	309	329	224	296
ADCY3_286_CCACGGAGATGATCACGATG	ADCY3	617.14	272.13	-1.1783	61939	10932	3.2997	0.00048391	0.99952	0.00096782	0.007886	FALSE	644	470	546	658
ADCY3_287_GTCGATGAGTATCTCGACCA	ADCY3	325.48	240.62	-0.43422	3620.5	4637.6	1.246	0.10638	0.89362	0.21276	0.4073	FALSE	243	259	184	286
ADCY3_288_TCTCTTCTAGGTAATCACAG	ADCY3	1.0567	0	-1.0404	0	2.8043	0.63105	0.28769	0.71231	0.57538	0.7431	FALSE	0	0	0	0
ADCY4_64469_GGAGAGGTTGGAAATCATGG	ADCY4	110.96	65.885	-0.7432	1032.8	1105.5	1.3556	0.087221	0.91278	0.17444	0.35839	FALSE	94	79	88	92
ADCY4_64470_GTGGCCCAAGATACAGCCCG	ADCY4	100.39	77.344	-0.37204	266.72	968.07	0.74074	0.22894	0.77106	0.45788	0.65225	FALSE	88	77	100	143
ADCY4_64471_TGGAGGCAGGCGGTGTACCA	ADCY4	100.39	117.45	0.22432	145.69	968.07	0.5482	0.70804	0.29196	0.58392	0.74966	TRUE	73	89	69	71
ADCY4_64472_TTCATCATCTAGTCCCCGGG	ADCY4	416.36	543.32	0.38315	8094.5	6448.6	1.581	0.94306	0.056943	0.11389	0.27107	TRUE	329	294	294	353
ADCY5_289_AGCCGCTCCAGTTTGTCCGA	ADCY5	234.6	177.6	-0.39956	1632	2994.3	1.0416	0.1488	0.8512	0.2976	0.50221	FALSE	248	220	147	187
ADCY5_290_AGCTACACTCACCTTTACGC	ADCY5	349.78	247.31	-0.49845	5289.8	5106.8	1.434	0.075788	0.92421	0.15158	0.3278	FALSE	342	356	238	322
ADCY5_291_CACAGCGGGCGAGTACACTG	ADCY5	194.44	148.96	-0.38218	1038.9	2331	0.94207	0.17305	0.82695	0.34611	0.5503	FALSE	383	321	198	239
ADCY5_292_GACGACGATCCTCCGCTGAG	ADCY5	369.86	420.14	0.18341	1265.1	5502.9	0.67775	0.75103	0.24897	0.49793	0.68514	TRUE	226	200	184	232
ADCY6_293_AACACTGCAGTACCTGAACG	ADCY6	648.84	532.81	-0.28376	6748	11693	1.073	0.14162	0.85838	0.28325	0.48723	FALSE	518	489	387	478
ADCY6_294_ATAGATCCCAAGCATCAGGG	ADCY6	192.33	350.43	0.8622	12775	2297.3	3.2987	0.99951	0.00048573	0.00097147	0.0079108	TRUE	261	249	103	158
ADCY6_295_GATGACGCCTTCATCCGGAG	ADCY6	117.3	91.667	-0.35232	329.76	1190.1	0.74303	0.22847	0.77153	0.45695	0.65131	FALSE	147	112	160	158
ADCY6_296_TTGGCCTGGCAACTTAACCG	ADCY6	201.84	144.18	-0.48245	1673.7	2449.9	1.1648	0.12203	0.87797	0.24405	0.44375	FALSE	187	149	171	183
ADCY7_297_AGAGGCACCAGAATGTCAGG	ADCY7	347.67	275	-0.3372	2649.6	5065.5	1.021	0.15361	0.84639	0.30723	0.51145	FALSE	355	385	296	359
ADCY7_298_CCGTAGCCGGGTGCACATCA	ADCY7	100.39	190.02	0.91377	4116.7	968.07	2.8806	0.99801	0.001986	0.0039719	0.024488	TRUE	132	163	58	42
ADCY7_299_GCGTGGGTAGGCAGCGACAC	ADCY7	61.291	69.705	0.18277	35.429	504.13	0.37471	0.64494	0.35506	0.71012	0.83756	TRUE	23	70	38	37
ADCY7_300_TGTACGTCGAGTGTCTCCTG	ADCY7	407.9	211.98	-0.94105	19698	6273.8	2.4736	0.0066881	0.99331	0.013376	0.061396	FALSE	369	291	234	296
ADCY8_301_ATTTCCAGGACAACAAACCG	ADCY8	189.16	227.26	0.26346	727.28	2247	0.80373	0.78922	0.21078	0.42156	0.61887	TRUE	229	292	121	162
ADCY8_302_CAAAACACGATGTTGACATG	ADCY8	789.39	465.97	-0.75923	53198	15217	2.6218	0.0043732	0.99563	0.0087464	0.044836	FALSE	529	591	490	681
ADCY8_303_CGATATTTAAGATGGCACCC	ADCY8	357.18	263.54	-0.4372	4409.4	5251.8	1.2921	0.098156	0.90184	0.19631	0.38717	FALSE	300	361	247	302
ADCY8_304_GCTGCAGGTCATCCTCCAAG	ADCY8	163.8	219.62	0.42087	1566.4	1854.9	1.2961	0.90252	0.097477	0.19495	0.38525	TRUE	168	169	132	127
ADCY9_305_GATATCGGGTCAGAGAGCCA	ADCY9	381.49	433.51	0.18397	1354.4	5735.7	0.68688	0.75392	0.24608	0.49216	0.68055	TRUE	438	480	260	346
ADCY9_306_GCTACCACGTCACTGCATCG	ADCY9	525.2	350.43	-0.58237	15427	8804	1.8626	0.031257	0.96874	0.062513	0.18174	FALSE	371	361	240	315
ADCY9_307_GGGAGACTGTTACTACTGCG	ADCY9	815.81	601.56	-0.43889	23084	15906	1.6988	0.044679	0.95532	0.089357	0.23091	FALSE	818	773	636	792
ADCY9_308_TGTACGCCCGGCATTACGCG	ADCY9	543.17	512.76	-0.08296	462.45	9210.3	0.31686	0.37568	0.62432	0.75135	0.864	FALSE	649	519	407	472
ADCYAP1_309_AGAGGAAGAGGCGTACGGCG	ADCYAP1	78.199	148	0.91178	2497.1	695.46	2.6469	0.99593	0.0040674	0.0081349	0.042379	TRUE	44	32	11	15
ADCYAP1_310_GAAGCACCTGCAGTCGCTCG	ADCYAP1	397.34	367.62	-0.11185	441.7	6057.1	0.38183	0.3513	0.6487	0.70259	0.83256	FALSE	393	423	223	329
ADCYAP1_311_GCTGCCAGACTTCGATGGCT	ADCYAP1	154.29	148	-0.059577	19.734	1713	0.15178	0.43963	0.56037	0.87925	0.93947	FALSE	152	108	85	82
ADCYAP1_312_GGCCTCGTTAAGGATCCCGT	ADCYAP1	78.199	105.03	0.42097	362.01	695.46	1.0176	0.84533	0.15467	0.30935	0.51374	TRUE	59	91	42	40
ADCYAP1R1_313_CGAATCTTCAACCCAGACCA	ADCYAP1R1	420.59	413.45	-0.024613	25.43	6536.5	0.088209	0.46486	0.53514	0.92971	0.96691	FALSE	439	358	253	322
ADCYAP1R1_314_GGTGAGCCGGAACTGCACGG	ADCYAP1R1	326.54	420.14	0.36264	4398.1	4657.8	1.3715	0.91489	0.085108	0.17022	0.35292	TRUE	421	256	252	255
ADCYAP1R1_315_TGAATATGAATCTGAGACTG	ADCYAP1R1	367.75	340.88	-0.10913	360.95	5460.8	0.36352	0.35811	0.64189	0.71621	0.84149	FALSE	270	306	211	230
ADCYAP1R1_316_TGTGGGACAACATCACGTGT	ADCYAP1R1	796.79	594.88	-0.42099	20492	15409	1.6266	0.051915	0.94809	0.10383	0.25524	FALSE	630	507	519	614
ADD1_317_ATTATCGAGCATCCGCATGA	ADD1	828.49	528.04	-0.64886	45703	16239	2.3578	0.009193	0.99081	0.018386	0.077309	FALSE	660	583	619	761
ADD1_318_CCTCTTGCCAATCTCCCCGG	ADD1	660.47	647.39	-0.028798	85.45	11975	0.11946	0.45245	0.54755	0.90491	0.95426	FALSE	408	566	538	561
ADD1_319_GACTAGCAGATCTCTTTGGG	ADD1	382.54	426.82	0.15762	981.07	5757	0.58359	0.72025	0.27975	0.5595	0.73251	TRUE	374	341	319	368
ADD1_320_GTAATGCCAATAGGCCTGTG	ADD1	616.08	856.51	0.47468	29097	10907	2.3021	0.98934	0.010664	0.021328	0.085844	TRUE	432	460	296	413
ADD2_321_ACTCGGCCATCTATGCAGCG	ADD2	734.44	587.24	-0.32221	10868	13811	1.2526	0.10518	0.89482	0.21036	0.40447	FALSE	743	669	539	680
ADD2_322_GCTGAGTGACACCTATGTCA	ADD2	591.78	320.83	-0.88118	37552	10333	2.6654	0.0038445	0.99616	0.0076891	0.040532	FALSE	450	442	438	616
ADD2_323_GGAGAAGCACCGGCCCCATG	ADD2	513.58	474.57	-0.11375	761.36	8543.6	0.42209	0.33648	0.66352	0.67296	0.81302	FALSE	626	588	374	452
ADD2_324_GGTGCTAAGAAACCATGGAG	ADD2	225.09	170.92	-0.39514	1474	2833.4	1.0176	0.15442	0.84558	0.30884	0.51321	FALSE	371	379	170	169
ADD3_325_AAGGATCCCACATTTCATGG	ADD3	197.61	335.16	0.75918	9622.1	2381.8	2.8183	0.99759	0.0024139	0.0048278	0.028453	TRUE	134	203	161	175
ADD3_326_ACCCAGAATACATTAGGGAG	ADD3	169.08	387.67	1.1923	24890	1935	4.9693	1	3.3599e-07	6.7198e-07	1.1949e-05	TRUE	133	175	112	173
ADD3_327_CTAGGCTTCTCTCGAATGAG	ADD3	943.68	295.05	-1.674	227170	19346	4.6633	1.5559e-06	1	3.1117e-06	4.8968e-05	FALSE	533	576	869	1050
ADD3_328_GTCTACAAGTCTGTACAGGC	ADD3	203.95	251.13	0.29887	1115.8	2484.2	0.94651	0.82805	0.17195	0.3439	0.54815	TRUE	191	189	88	120
ADGB_49831_AAAAGCGACAAAGTTCCAAA	ADGB	64.462	42.969	-0.57417	233.32	538.81	0.92593	0.17498	0.82502	0.34996	0.55399	FALSE	74	88	8	15
ADGB_49832_CAACTTATGAATTTGAACTG	ADGB	183.87	136.54	-0.42664	1126.2	2163.7	1.0175	0.15443	0.84557	0.30886	0.51322	FALSE	210	121	82	127
ADGB_49833_GAAGGTAAATCAGATCCTGG	ADGB	119.41	124.13	0.055462	11.137	1218.6	0.13519	0.55363	0.44637	0.89274	0.94718	TRUE	197	144	106	144
ADGB_49834_TCAGTGAAATCTATGCAGTG	ADGB	295.89	187.15	-0.65802	5988.7	4082.7	1.7018	0.044396	0.9556	0.088792	0.23008	FALSE	197	268	173	255
ADGRA1_53583_ACCTTCACTGTGTTCGCCGG	ADGRA1	197.61	138.45	-0.51016	1763.5	2381.8	1.2121	0.1127	0.8873	0.22541	0.42193	FALSE	125	188	161	162
ADGRA1_53584_CCCCGCACTTGACGCCAACG	ADGRA1	243.05	196.7	-0.30387	1077.2	3139.2	0.82728	0.20403	0.79597	0.40807	0.60731	FALSE	162	190	133	173
ADGRA1_53585_GGTGCCCAGGAAGTACACAC	ADGRA1	203.95	184.29	-0.14552	193.47	2484.2	0.39454	0.34658	0.65342	0.69316	0.82621	FALSE	194	247	133	172
ADGRA1_53586_TGCACTCAGTACCTGAGCAG	ADGRA1	519.92	500.35	-0.055254	191.58	8685.4	0.21003	0.41682	0.58318	0.83365	0.91362	FALSE	439	374	301	409
ADGRA2_34199_AGGGATGAGAATAGACTCGG	ADGRA2	163.8	117.45	-0.47643	1081.5	1854.9	1.0761	0.14087	0.85913	0.28174	0.48569	FALSE	182	194	100	141
ADGRA2_34200_GAGCTGACGCTGTCTCACAT	ADGRA2	276.87	296.96	0.10073	201.93	3735.7	0.32875	0.62883	0.37117	0.74235	0.85811	TRUE	260	233	259	382
ADGRA2_34201_GCCACGTTCCTCGCATTCTG	ADGRA2	397.34	438.28	0.14115	838.68	6057.1	0.52608	0.70058	0.29942	0.59883	0.76048	TRUE	186	225	244	249
ADGRA2_34202_TGAGCAATAACAAGATCACG	ADGRA2	180.7	105.99	-0.76412	2840.1	2114.2	1.6249	0.052048	0.94795	0.1041	0.25565	FALSE	104	93	117	169
ADGRA3_63893_ATCTGAACTATACACCCAGG	ADGRA3	142.66	215.8	0.59368	2702.9	1543.5	1.8616	0.96867	0.031335	0.06267	0.18204	TRUE	262	319	87	101
ADGRA3_63894_CACTCCTACCCATAGTACTG	ADGRA3	363.52	434.46	0.25654	2521.2	5377	0.96743	0.83334	0.16666	0.33333	0.53785	TRUE	401	373	306	380
ADGRA3_63895_TGATGGAAAACGACGTACTG	ADGRA3	345.56	274.04	-0.33342	2565.5	5024.3	1.0089	0.15652	0.84348	0.31303	0.51756	FALSE	235	240	195	270
ADGRA3_63896_TTCAGCGCATTGCTACCTAC	ADGRA3	145.83	268.32	0.87514	7672.7	1589.3	3.0724	0.99894	0.0010618	0.0021236	0.014829	TRUE	141	118	58	71
ADGRB1_1569_CAGGATGAGTACCGGCAGTG	ADGRB1	997.57	768.66	-0.37564	26310	20848	1.5854	0.05644	0.94356	0.11288	0.26943	FALSE	738	762	721	887
ADGRB1_1570_CCCACGATGAGCGTCACCGA	ADGRB1	742.89	871.79	0.23053	8320	14025	1.0884	0.86179	0.13821	0.27642	0.47976	TRUE	671	523	517	677
ADGRB1_1571_CCTGTGGGGCGAATGCACGC	ADGRB1	561.13	472.66	-0.24707	3921.3	9621.4	0.90202	0.18352	0.81648	0.36705	0.56992	FALSE	492	478	447	537
ADGRB1_1572_GAAGCATCCGTGTTTGTGGT	ADGRB1	1069.4	682.72	-0.6467	75703	22894	2.5558	0.0052977	0.9947	0.010595	0.051695	FALSE	1259	964	827	1001
ADGRB2_1573_ATCATCAGCCGAGGGCACGT	ADGRB2	413.19	375.26	-0.13856	719.71	6382.9	0.47474	0.31748	0.68252	0.63497	0.78673	FALSE	383	321	287	359
ADGRB2_1574_CAGCCACTGATAGCAAGTGG	ADGRB2	671.04	773.44	0.20461	5249.6	12233	0.92585	0.82274	0.17726	0.35452	0.5582	TRUE	441	508	463	538
ADGRB2_1575_CTCTCTCGTAGGCGACCCGG	ADGRB2	286.38	441.15	0.62157	12115	3908.2	2.4756	0.99335	0.0066499	0.0133	0.061106	TRUE	285	318	191	222
ADGRB2_1576_TGAGCAAGACCTCGACAAAG	ADGRB2	231.43	207.2	-0.15878	293.61	2940.4	0.44671	0.32753	0.67247	0.65507	0.80083	FALSE	150	158	149	181
ADGRB3_1577_AGGCGAATAAGGACCTGTCA	ADGRB3	505.13	347.57	-0.53805	12520	8355.5	1.7237	0.042385	0.95762	0.08477	0.22308	FALSE	403	334	312	414
ADGRB3_1578_AGGGTCAATAGAGTTAATGC	ADGRB3	82.426	67.795	-0.2782	107.29	745.61	0.53583	0.29514	0.70486	0.59029	0.75377	FALSE	57	56	78	96
ADGRB3_1579_CCAAGTCTGCAATCTTACCA	ADGRB3	368.81	483.16	0.38872	6568.1	5481.9	1.5445	0.93877	0.061234	0.12247	0.28456	TRUE	342	417	253	329
ADGRB3_1580_TACAGTACACGGAGTATGGG	ADGRB3	526.26	614.93	0.22425	3937	8827.7	0.94373	0.82735	0.17265	0.34531	0.54938	TRUE	309	333	407	434
ADGRD1_67341_AAAAGAAAACGTGACCCCTG	ADGRD1	358.24	228.21	-0.64826	8559.8	5272.6	1.7907	0.036672	0.96333	0.073344	0.20239	FALSE	341	236	309	340
ADGRD1_67342_CCTGCTCAGACCCTATCACG	ADGRD1	73.972	266.41	1.8346	20290	646.2	7.57	1	1.8696e-14	3.7391e-14	1.3753e-12	TRUE	37	80	13	21
ADGRD1_67343_GAAGGGGTCTGGTCGAACCA	ADGRD1	269.47	237.76	-0.17991	503.28	3603	0.52829	0.29865	0.70135	0.59729	0.75935	FALSE	213	220	179	181
ADGRD1_67344_TCTCTTCCCAAGGATCGCGG	ADGRD1	73.972	0	-6.2283	5097.8	646.2	2.9099	0.0002299	0.99977	0.0004598	0.0042204	FALSE	45	40	54	78
ADGRE1_5557_CACGTGGACTAAATTCACCA	ADGRE1	258.9	85.937	-1.5799	16039	3415.5	2.9596	0.0015355	0.99846	0.003071	0.019953	FALSE	244	177	203	268
ADGRE1_5558_CCAGGATTTGAATCCAGCAG	ADGRE1	259.96	258.77	-0.0066109	0.71171	3434.1	0.020359	0.49188	0.50812	0.98375	0.99208	FALSE	275	272	183	223
ADGRE1_5559_CCTGCAAAAACCTGTCAGGG	ADGRE1	161.68	326.56	1.0097	14004	1823.1	3.8615	0.99994	5.6349e-05	0.0001127	0.0012535	TRUE	243	251	154	208
ADGRE1_5560_TGCCACCTGCACCAATACAG	ADGRE1	169.08	115.54	-0.54541	1446.2	1935	1.2172	0.11172	0.88828	0.22343	0.41961	FALSE	164	70	118	174
[truncated: 76,033 more rows]
