# Supplementary material for: Identification of regulators of poly-ADP-ribose polymerase inhibitor response through complementary CRISPR knockout and activation screens
Source: Nat Commun. 2020 Nov 30;11:6118. doi: 10.1038/s41467-020-19961-w (PMC7704667; doi:10.1038/s41467-020-19961-w)
Supplement: Supplementary file 5 — Supplementary Data 2 [file 41467_2020_19961_MOESM5_ESM.xlsx]

## Sheet: Gene rank
Gene name	Number of sgRNAs	Score negative selection	P-value negative selection	FDR negative selection	Rank negative selection	Number of good sgRNAs negative selection	Log2 fold change negative selection	Score positive selection	P-value positive selection	FDR positive selection	Rank positive selection	Number of good sgRNAs positive selection	Log2 fold change positive selection	Log(score positive selection)
COX17	4	1	1	1	19113	0	3.2906	7.5346e-09	2.5901e-07	0.001238	1	4	3.2906	-8.12294
MARS2	4	1	1	1	19112	0	3.3406	1.8365e-08	2.5901e-07	0.001238	2	4	3.3406	-7.73601
VHL	4	0.98946	0.98955	1	18485	0	4.5032	2.4888e-08	2.5901e-07	0.001238	3	4	4.5032	-7.60401
C14orf80	4	1	1	1	19111	0	2.5075	3.5837e-08	2.5901e-07	0.001238	4	4	2.5075	-7.44567
RPP21	4	1	1	1	19110	0	3.4531	1.67e-07	1.2951e-06	0.003465	5	4	3.4531	-6.77728
POLR3H	4	0.74371	0.75614	1	13803	1	4.5269	2.0093e-07	1.2951e-06	0.003465	6	3	4.5269	-6.69696
ATP6V1B2	4	0.99504	0.99513	1	18670	0	4.1783	2.4726e-07	1.8131e-06	0.003465	7	4	4.1783	-6.60685
PSMG3	4	1	1	1	19109	0	3.6326	2.7569e-07	1.8131e-06	0.003465	8	4	3.6326	-6.55958
TELO2	4	1	1	1	19108	0	2.5506	3.0878e-07	1.8131e-06	0.003465	9	4	2.5506	-6.51035
IPO13	4	1	1	1	19107	0	2.6368	3.3746e-07	1.8131e-06	0.003465	10	4	2.6368	-6.47178
ZBTB8OS	4	1	1	1	19106	0	4.0682	4.3386e-07	2.3311e-06	0.003713	11	4	4.0682	-6.36265
CYCS	4	1	1	1	19103	0	3.625	4.3647e-07	2.3311e-06	0.003713	12	4	3.625	-6.36005
POLG2	4	1	1	1	19105	0	2.3491	5.4436e-07	3.3672e-06	0.00495	13	4	2.3491	-6.26411
ATP6V0C	4	1	1	1	19104	0	2.5414	6.1824e-07	3.8852e-06	0.00526	14	4	2.5414	-6.20884
GINS2	4	1	1	1	19102	0	3.6466	8.0481e-07	4.4032e-06	0.00526	15	4	3.6466	-6.09431
RPL28	4	0.46804	0.60421	1	11076	1	3.6487	8.1039e-07	4.4032e-06	0.00526	16	3	3.6487	-6.09131
PRMT1	4	0.99993	0.99994	1	19031	0	3.1021	9.8706e-07	4.9212e-06	0.005533	17	4	3.1021	-6.00566
TIPARP	4	1	1	1	19101	0	2.1252	1.3333e-06	6.4753e-06	0.006365	18	4	2.1252	-5.87507
WDR77	4	0.97674	0.97687	1	18148	0	3.6394	1.4448e-06	6.9933e-06	0.006365	19	3	3.6394	-5.84019
SYS1	4	0.99913	0.99917	1	18904	0	3.2412	1.5599e-06	6.9933e-06	0.006365	20	4	3.2412	-5.8069
RPE	4	1	1	1	19100	0	2.7694	1.5706e-06	6.9933e-06	0.006365	21	4	2.7694	-5.80393
NHP2	4	0.92607	0.92601	1	17106	0	2.7246	1.7218e-06	7.5113e-06	0.006451	22	3	2.7246	-5.76402
GFER	4	0.99994	0.99994	1	19035	0	3.0253	2.0061e-06	9.0654e-06	0.006451	23	4	3.0253	-5.69765
VRK1	4	1	1	1	19099	0	1.5392	2.0872e-06	9.0654e-06	0.006451	24	4	1.5392	-5.68044
SPATA5L1	4	1	1	1	19098	0	2.5567	2.2808e-06	9.5834e-06	0.006451	25	4	2.5567	-5.64191
MYH9	4	1	1	1	19097	0	1.3938	2.3982e-06	1.0101e-05	0.006451	26	4	1.3938	-5.62011
MAK16	4	0.98234	0.98243	1	18294	0	2.8628	2.5679e-06	1.0619e-05	0.006451	27	4	2.8628	-5.59042
CDIPT	4	0.98012	0.98024	1	18238	0	3.164	2.5909e-06	1.0619e-05	0.006451	28	3	3.164	-5.58655
CHURC1-FNTB	4	0.99999	1	1	19084	0	3.32	2.7551e-06	1.1138e-05	0.006451	29	4	3.32	-5.55986
WDR83	4	1	1	1	19096	0	2.8774	2.7742e-06	1.1138e-05	0.006451	30	4	2.8774	-5.55686
E2F7	4	1	1	1	19095	0	1.098	2.8774e-06	1.1138e-05	0.006451	31	4	1.098	-5.541
NOL10	4	0.99999	1	1	19085	0	3.0056	2.9279e-06	1.1138e-05	0.006451	32	4	3.0056	-5.53344
WDR18	4	1	1	1	19094	0	2.3107	2.9283e-06	1.1138e-05	0.006451	33	4	2.3107	-5.53338
HSD17B10	4	1	1	1	19093	0	2.2739	3.1501e-06	1.2692e-05	0.006931	34	4	2.2739	-5.50168
GPN2	4	1	1	1	19092	0	2.8244	3.2162e-06	1.2692e-05	0.006931	35	4	2.8244	-5.49266
CEBPZ	4	0.99622	0.99633	1	18719	0	3.631	3.4441e-06	1.3728e-05	0.006954	36	4	3.631	-5.46292
RPLP0	4	1	1	1	19091	0	2.3003	3.7617e-06	1.4246e-05	0.006954	37	4	2.3003	-5.42462
PGP	4	1	1	1	19090	0	2.1234	3.7706e-06	1.4246e-05	0.006954	38	4	2.1234	-5.42359
RPL24	4	1	1	1	19089	0	2.4057	3.815e-06	1.4764e-05	0.006954	39	4	2.4057	-5.41851
TUFM	4	0.75916	0.76772	1	14029	1	3.0371	3.8349e-06	1.4764e-05	0.006954	40	3	3.0371	-5.41625
MRPL57	4	0.99999	0.99999	1	19077	0	3.3244	4.0486e-06	1.5282e-05	0.006954	41	4	3.3244	-5.3927
ATP6V1G1	4	0.89706	0.89706	1	16534	0	3.0193	4.1111e-06	1.5282e-05	0.006954	42	3	3.0193	-5.38604
CYC1	4	1	1	1	19088	0	1.8646	4.2856e-06	1.58e-05	0.007023	43	4	1.8646	-5.36799
GART	4	1	1	1	19087	0	1.7381	4.8437e-06	1.9426e-05	0.008438	44	4	1.7381	-5.31482
UQCRC1	4	0.99999	1	1	19086	0	1.335	5.0084e-06	2.0462e-05	0.008691	45	4	1.335	-5.3003
ATP6AP1	4	0.93295	0.93291	1	17239	0	2.7469	5.1815e-06	2.098e-05	0.008717	46	3	2.7469	-5.28554
DPH1	4	0.99999	1	1	19083	0	1.6422	5.6735e-06	2.2016e-05	0.008833	47	4	1.6422	-5.24615
PGAM1	4	0.94862	0.9487	1	17555	0	2.7355	5.8491e-06	2.2534e-05	0.008833	48	3	2.7355	-5.23291
NUPL1	4	0.99999	1	1	19082	0	2.107	6.2594e-06	2.3052e-05	0.008833	49	4	2.107	-5.20347
NEDD8	4	0.99999	1	1	19081	0	1.6585	6.3438e-06	2.357e-05	0.008833	50	4	1.6585	-5.19765
CIAO1	4	0.99999	1	1	19080	0	1.9799	6.4987e-06	2.357e-05	0.008833	51	4	1.9799	-5.18717
SKP2	4	0.99999	1	1	19079	0	2.3816	6.8065e-06	2.4606e-05	0.009044	52	4	2.3816	-5.16708
DNM1L	4	0.99996	0.99997	1	19048	0	2.6632	6.8765e-06	2.5124e-05	0.00906	53	4	2.6632	-5.16263
PRMT5	4	0.61429	0.67421	1	12343	1	2.7432	7.0099e-06	2.616e-05	0.009259	54	3	2.7432	-5.15429
TPI1	4	0.99999	0.99999	1	19078	0	2.2638	7.5883e-06	2.875e-05	0.009989	55	4	2.2638	-5.11986
ARPC4	4	0.99998	0.99998	1	19056	0	2.206	7.7032e-06	2.9268e-05	0.009989	56	4	2.206	-5.11333
GMPS	4	0.99994	0.99994	1	19034	0	2.7376	8.1649e-06	3.1858e-05	0.010683	57	4	2.7376	-5.08805
RNMT	4	0.93836	0.93833	1	17368	0	2.7109	8.4405e-06	3.4449e-05	0.011099	58	3	2.7109	-5.07363
HUWE1	4	0.99999	0.99999	1	19069	0	2.5488	8.5678e-06	3.4967e-05	0.011099	59	4	2.5488	-5.06713
TRMT112	4	0.9993	0.99933	1	18924	0	3.5764	8.7324e-06	3.5485e-05	0.011099	60	4	3.5764	-5.05887
TERF2	4	0.89623	0.89625	1	16521	0	2.5893	8.774e-06	3.5485e-05	0.011099	61	3	2.5893	-5.0568
ATP5H	4	0.99999	0.99999	1	19076	0	2.4475	8.9482e-06	3.6003e-05	0.011099	62	4	2.4475	-5.04826
SACM1L	4	0.99911	0.99914	1	18902	0	3.1158	9.4126e-06	3.8075e-05	0.011348	63	4	3.1158	-5.02629
DAD1	4	0.99999	0.99999	1	19075	0	3.0797	9.4661e-06	3.8593e-05	0.011348	64	4	3.0797	-5.02383
XRCC6	4	0.99999	0.99999	1	19074	0	2.0154	9.4837e-06	3.8593e-05	0.011348	65	4	2.0154	-5.02302
COA6	4	0.99999	0.99999	1	19073	0	1.7551	9.7965e-06	4.0665e-05	0.011776	66	4	1.7551	-5.00893
HNRNPU	4	0.99998	0.99998	1	19061	0	3.0564	1.0369e-05	4.2737e-05	0.012158	67	4	3.0564	-4.98426
TCEB2	4	0.99999	0.99999	1	19072	0	2.7135	1.0417e-05	4.3255e-05	0.012158	68	4	2.7135	-4.98226
ATP6V0B	4	0.99207	0.99214	1	18572	0	2.5876	1.0871e-05	4.4291e-05	0.012235	69	4	2.5876	-4.96373
DDX10	4	0.98878	0.98884	1	18466	0	3.0064	1.0901e-05	4.4809e-05	0.012235	70	4	3.0064	-4.96253
RAC1	4	0.99988	0.99989	1	19012	0	2.3071	1.1731e-05	4.7917e-05	0.012858	71	4	2.3071	-4.93066
CCDC84	4	0.99979	0.99981	1	18991	0	2.9685	1.1756e-05	4.8435e-05	0.012858	72	4	2.9685	-4.92974
TKT	4	0.99999	0.99999	1	19071	0	2.4067	1.225e-05	5.1025e-05	0.013223	73	4	2.4067	-4.91186
XRCC3	4	0.99999	0.99999	1	19070	0	2.0375	1.2455e-05	5.2061e-05	0.013223	74	4	2.0375	-4.90466
DKC1	4	0.99332	0.9934	1	18602	0	2.6265	1.257e-05	5.2579e-05	0.013223	75	4	2.6265	-4.90066
RTCB	4	0.9957	0.99581	1	18701	0	2.6323	1.2638e-05	5.2579e-05	0.013223	76	4	2.6323	-4.89832
MED19	4	0.19288	0.33393	1	6284	1	2.0325	1.3241e-05	5.4652e-05	0.013519	77	3	2.0325	-4.87808
MRPL53	4	0.99999	0.99999	1	19068	0	1.8137	1.3287e-05	5.517e-05	0.013519	78	4	1.8137	-4.87657
MRPS18A	4	0.99953	0.99955	1	18950	0	2.3614	1.4311e-05	5.8278e-05	0.013614	79	4	2.3614	-4.84433
IMP3	4	0.92246	0.92253	1	17032	0	2.9992	1.4311e-05	5.8278e-05	0.013614	80	3	2.9992	-4.84433
YARS2	4	0.99999	0.99999	1	19067	0	2.4337	1.434e-05	5.8278e-05	0.013614	81	4	2.4337	-4.84345
DNAJC11	4	0.99604	0.99614	1	18716	0	2.5048	1.4546e-05	5.9832e-05	0.013614	82	4	2.5048	-4.83726
MIS18A	4	0.9997	0.99972	1	18978	0	3.5429	1.4728e-05	5.9832e-05	0.013614	83	4	3.5429	-4.83186
GTF2A2	4	0.99999	0.99999	1	19066	0	2.404	1.4803e-05	5.9832e-05	0.013614	84	4	2.404	-4.82965
MTG1	4	0.99998	0.99999	1	19065	0	1.5718	1.5892e-05	6.294e-05	0.013988	85	4	1.5718	-4.79882
TNPO1	4	0.99998	0.99999	1	19064	0	2.1492	1.5911e-05	6.294e-05	0.013988	86	4	2.1492	-4.7983
MARCHF5	4	0.99998	0.99999	1	19063	0	1.6362	1.6378e-05	6.6048e-05	0.01451	87	4	1.6362	-4.78574
JTB	4	0.99998	0.99998	1	19062	0	1.8089	1.7095e-05	7.071e-05	0.015358	88	4	1.8089	-4.76713
GATB	4	0.99921	0.99924	1	18917	0	2.6951	1.7859e-05	7.4854e-05	0.015952	89	4	2.6951	-4.74814
ZCRB1	4	0.99996	0.99997	1	19047	0	2.5719	1.7901e-05	7.5113e-05	0.015952	90	4	2.5719	-4.74712
ISCA2	4	0.98242	0.98253	1	18296	0	2.6649	1.9117e-05	8.3661e-05	0.017572	91	4	2.6649	-4.71858
MED12	4	0.99998	0.99998	1	19060	0	2.1637	1.9895e-05	8.5733e-05	0.017811	92	4	2.1637	-4.70126
PHB	4	0.99962	0.99964	1	18961	0	2.7766	2.1239e-05	8.9877e-05	0.018395	93	4	2.7766	-4.67287
DARS2	4	0.79185	0.79448	1	14512	1	2.1462	2.1356e-05	9.0913e-05	0.018395	94	3	2.1462	-4.67048
NOL9	4	0.99987	0.99988	1	19008	0	2.4691	2.1497e-05	9.1431e-05	0.018395	95	4	2.4691	-4.66762
DOHH	4	0.99996	0.99997	1	19044	0	2.0836	2.1924e-05	9.2467e-05	0.01841	96	4	2.0836	-4.65908
NUBP1	4	0.99992	0.99993	1	19029	0	2.391	2.3363e-05	9.972e-05	0.019649	97	4	2.391	-4.63147
ATP5C1	4	0.99998	0.99998	1	19059	0	2.4795	2.3599e-05	0.00010076	0.01965	98	4	2.4795	-4.62711
PCID2	4	0.99998	0.99998	1	19058	0	2.4771	2.3897e-05	0.00010386	0.020052	99	4	2.4771	-4.62166
TIMM10	4	0.99998	0.99998	1	19057	0	2.6628	2.4467e-05	0.00010749	0.020415	100	4	2.6628	-4.61142
MRPS35	4	0.9997	0.99971	1	18975	0	2.0999	2.4811e-05	0.00010904	0.020415	101	4	2.0999	-4.60536
PMVK	4	0.99992	0.99992	1	19027	0	2.5549	2.5019e-05	0.00011008	0.020415	102	4	2.5549	-4.60173
EARS2	4	0.99997	0.99998	1	19055	0	1.9585	2.5508e-05	0.00011163	0.020415	103	4	1.9585	-4.59332
NMT1	4	0.9959	0.996	1	18710	0	2.7269	2.5826e-05	0.00011163	0.020415	104	4	2.7269	-4.58794
HSPD1	4	0.92832	0.92828	1	17148	0	2.7328	2.621e-05	0.00011215	0.020415	105	3	2.7328	-4.58153
KAT5	4	0.99964	0.99966	1	18963	0	2.1453	2.7827e-05	0.00011785	0.02125	106	4	2.1453	-4.55553
RPL8	4	0.99997	0.99998	1	19054	0	2.4778	2.8394e-05	0.0001194	0.021329	107	4	2.4778	-4.54677
FAM96B	4	0.99997	0.99998	1	19053	0	1.7791	2.9474e-05	0.00012303	0.021773	108	4	1.7791	-4.53056
WDR3	4	0.99997	0.99997	1	19052	0	2.3089	3.0068e-05	0.00012562	0.022007	109	4	2.3089	-4.5219
RPS16	4	0.77995	0.78445	1	14324	1	2.5191	3.0243e-05	0.00012666	0.022007	110	3	2.5191	-4.51938
C10orf2	4	0.99991	0.99991	1	19025	0	2.0409	3.0598e-05	0.00012821	0.022077	111	4	2.0409	-4.51431
DPH6	4	0.12859	0.26492	0.986175	5121	1	1.8958	3.1258e-05	0.00012976	0.022124	112	3	1.8958	-4.50504
TANGO6	4	0.99493	0.99501	1	18666	0	2.6074	3.1561e-05	0.0001308	0.022124	113	4	2.6074	-4.50085
DHODH	4	0.99976	0.99978	1	18987	0	2.3711	3.2235e-05	0.00013236	0.02219	114	4	2.3711	-4.49167
GATC	4	0.98207	0.98215	1	18287	0	2.8385	3.2637e-05	0.00013391	0.022256	115	4	2.8385	-4.48629
PGK1	4	0.98403	0.98416	1	18347	0	2.0064	3.3928e-05	0.00013598	0.022405	116	4	2.0064	-4.46944
BRD4	4	0.99997	0.99997	1	19051	0	1.6812	3.4382e-05	0.00013805	0.022552	117	4	1.6812	-4.46367
RPS11	4	0.99997	0.99997	1	19050	0	3.0941	3.465e-05	0.00014013	0.022697	118	4	3.0941	-4.4603
SF3B5	4	0.99996	0.99997	1	19049	0	2.593	3.526e-05	0.00014323	0.022952	119	4	2.593	-4.45272
CDAN1	4	0.015942	0.051785	0.893511	1104	1	1.751	3.5351e-05	0.00014427	0.022952	120	3	1.751	-4.4516
SBDS	4	0.96845	0.96854	1	17978	0	2.0078	3.5613e-05	0.00014531	0.022952	121	3	2.0078	-4.44839
DDX42	4	0.8294	0.82952	1	15158	0	2.5228	3.676e-05	0.00014841	0.023195	122	3	2.5228	-4.43462
RAD9A	4	0.99996	0.99997	1	19046	0	2.1092	3.7005e-05	0.00014997	0.023195	123	4	2.1092	-4.43174
DHPS	4	0.99948	0.9995	1	18944	0	2.4222	3.7218e-05	0.00015049	0.023195	124	4	2.4222	-4.42925
VPS52	4	0.96321	0.96328	1	17856	0	1.7747	3.7694e-05	0.00015256	0.02322	125	3	1.7747	-4.42373
BUB3	4	0.99056	0.99065	1	18524	0	2.4274	3.7722e-05	0.00015308	0.02322	126	4	2.4274	-4.42341
SAMM50	4	0.99996	0.99997	1	19045	0	2.0551	3.9094e-05	0.00015981	0.024051	127	4	2.0551	-4.40789
RARS	4	0.99996	0.99996	1	19043	0	1.6395	4.0322e-05	0.00016603	0.024714	128	4	1.6395	-4.39446
ATP5D	4	0.87511	0.87515	1	16087	0	2.3395	4.0712e-05	0.00016758	0.024714	129	3	2.3395	-4.39028
MTOR	4	0.99996	0.99996	1	19042	0	1.8752	4.0887e-05	0.0001681	0.024714	130	4	1.8752	-4.38841
POLD2	4	0.99937	0.9994	1	18932	0	3.3556	4.2649e-05	0.00017535	0.025584	131	4	3.3556	-4.37009
ATP5I	4	0.99996	0.99996	1	19041	0	2.1186	4.4289e-05	0.00018209	0.026365	132	4	2.1186	-4.3537
PWP2	4	0.99995	0.99995	1	19038	0	2.5392	4.5726e-05	0.00018623	0.026762	133	4	2.5392	-4.33984
EIF4E	4	0.96444	0.96455	1	17882	0	1.8178	4.8906e-05	0.00020073	0.028429	134	3	1.8178	-4.31064
PRIM1	4	0.99994	0.99994	1	19032	0	2.0496	4.9069e-05	0.00020125	0.028429	135	4	2.0496	-4.30919
TAF1B	4	0.99235	0.99242	1	18579	0	2.3859	4.9341e-05	0.00020229	0.028429	136	4	2.3859	-4.30679
DUT	4	0.99995	0.99995	1	19040	0	1.9095	5.0944e-05	0.0002085	0.029089	137	4	1.9095	-4.29291
C19orf53	4	0.99995	0.99995	1	19039	0	1.9062	5.1948e-05	0.00021058	0.029165	138	4	1.9062	-4.28443
RSL1D1	4	0.99995	0.99995	1	19037	0	1.4482	5.3903e-05	0.00021679	0.029668	139	4	1.4482	-4.26839
SUMO2	4	0.97647	0.97662	1	18142	0	2.3996	5.4337e-05	0.00021887	0.029668	140	3	2.3996	-4.2649
MRPL23	4	0.765	0.77222	1	14108	1	2.5188	5.4337e-05	0.00021887	0.029668	141	3	2.5188	-4.2649
DTYMK	4	0.99026	0.99035	1	18513	0	2.0861	5.5262e-05	0.00022353	0.030015	142	4	2.0861	-4.25757
MTPAP	4	0.88257	0.88263	1	16254	0	3.3747	5.561e-05	0.00022456	0.030015	143	3	3.3747	-4.25485
TAF1C	4	0.99994	0.99994	1	19036	0	2.6091	6.0559e-05	0.00024477	0.032488	144	4	2.6091	-4.21782
PTPMT1	4	0.74484	0.757	1	13826	1	2.0174	6.1518e-05	0.00024839	0.032742	145	2	2.0174	-4.211
GPR89B	4	0.93634	0.93628	1	17309	0	2.2305	6.2323e-05	0.00025254	0.03306	146	3	2.2305	-4.20535
GTF2H1	4	0.99994	0.99994	1	19033	0	1.59	6.3446e-05	0.0002572	0.033441	147	4	1.59	-4.1976
PPP1R35	4	0.8208	0.82103	1	15029	1	1.7965	6.7317e-05	0.00027429	0.035252	148	3	1.7965	-4.17188
KIAA0391	4	0.9793	0.97943	1	18215	0	3.0777	6.7417e-05	0.00027481	0.035252	149	3	3.0777	-4.17123
FEN1	4	0.83898	0.83911	1	15373	0	2.0576	6.782e-05	0.0002774	0.035347	150	3	2.0576	-4.16864
GRB2	4	0.97723	0.97736	1	18153	0	2.3494	6.9859e-05	0.00028621	0.036227	151	3	2.3494	-4.15578
RPA3	4	0.99883	0.99889	1	18877	0	2.4337	7.0893e-05	0.00028828	0.036249	152	4	2.4337	-4.1494
CARM1	4	0.99993	0.99993	1	19030	0	1.0482	7.2769e-05	0.00029501	0.036807	153	4	1.0482	-4.13805
RPL10	4	0.98809	0.98812	1	18446	0	2.7062	7.3417e-05	0.00029657	0.036807	154	4	2.7062	-4.1342
DNLZ	4	0.99633	0.99643	1	18722	0	2.2735	7.4164e-05	0.00029916	0.036889	155	4	2.2735	-4.12981
ASH2L	4	0.89399	0.89397	1	16488	0	1.8959	7.5891e-05	0.00030589	0.037365	156	3	1.8959	-4.11981
WDR55	4	0.98968	0.98977	1	18495	0	2.1397	7.5999e-05	0.00030693	0.037365	157	4	2.1397	-4.11919
ARMC7	4	0.99934	0.99937	1	18927	0	2.974	7.6676e-05	0.00031107	0.037518	158	4	2.974	-4.11534
POLRMT	4	0.79634	0.79836	1	14585	1	2.4706	7.7228e-05	0.00031211	0.037518	159	3	2.4706	-4.11223
ENO1	4	0.99992	0.99993	1	19028	0	1.3329	7.8766e-05	0.00031936	0.03815	160	4	1.3329	-4.10366
NUP155	4	0.80546	0.8066	1	14734	1	2.6059	7.9648e-05	0.00032247	0.038282	161	3	2.6059	-4.09883
SEPHS2	4	0.94808	0.94814	1	17543	0	1.6909	8.0019e-05	0.00032454	0.03829	162	2	1.6909	-4.09681
SAP18	4	0.99951	0.99953	1	18947	0	1.7782	8.1457e-05	0.00032713	0.038306	163	4	1.7782	-4.08907
SUPT16H	4	0.95345	0.95354	1	17636	0	2.9102	8.18e-05	0.00032869	0.038306	164	3	2.9102	-4.08725
DHX33	4	0.99971	0.99972	1	18979	0	2.0747	8.4806e-05	0.00033853	0.039214	165	4	2.0747	-4.07157
EIF4G1	4	0.99991	0.99992	1	19026	0	1.8913	8.6229e-05	0.00034371	0.039337	166	4	1.8913	-4.06435
PGGT1B	4	0.41113	0.55741	1	10239	1	2.9049	8.6333e-05	0.00034371	0.039337	167	3	2.9049	-4.06382
REXO2	4	0.99697	0.99706	1	18758	0	2.0513	8.8245e-05	0.00034734	0.03934	168	4	2.0513	-4.05431
COG4	4	0.96461	0.96472	1	17888	0	2.2401	8.9029e-05	0.00034785	0.03934	169	3	2.2401	-4.05047
LSG1	4	0.995	0.99508	1	18668	0	1.9434	9.1529e-05	0.00035562	0.039983	170	4	1.9434	-4.03844
SDHB	4	0.84773	0.84782	1	15543	0	2.1495	9.2765e-05	0.00036029	0.04027	171	3	2.1495	-4.03262
HNRNPH3	4	0.9999	0.99991	1	19024	0	1.1399	9.6654e-05	0.00037479	0.041647	172	4	1.1399	-4.01478
TINF2	4	0.99982	0.99985	1	18995	0	2.7959	9.7564e-05	0.00038101	0.042094	173	4	2.7959	-4.01071
TFE3	4	0.9999	0.99991	1	19023	0	1.389	9.8735e-05	0.00038411	0.042107	174	4	1.389	-4.00553
PREB	4	0.7907	0.79349	1	14498	1	2.3202	9.999e-05	0.00038567	0.042107	175	3	2.3202	-4.00004
EIF2B3	4	0.99364	0.99372	1	18608	0	2.4561	0.00010094	0.00038774	0.042107	176	4	2.4561	-3.99594
UBA52	4	0.89097	0.89099	1	16419	0	2.4987	0.00010272	0.00039448	0.042342	177	3	2.4987	-3.98834
DOLK	4	0.75201	0.76229	1	13924	1	2.1423	0.00010292	0.00039499	0.042342	178	3	2.1423	-3.9875
INTS5	4	0.99637	0.99647	1	18727	0	1.8112	0.00010319	0.00039655	0.042342	179	4	1.8112	-3.98636
ERGIC3	4	0.99989	0.9999	1	19022	0	1.1627	0.00010604	0.0004095	0.04346	180	4	1.1627	-3.97453
LUC7L3	4	0.99989	0.9999	1	19021	0	1.7442	0.00010642	0.00041157	0.04346	181	4	1.7442	-3.97298
SLC25A3	4	0.4819	0.61017	1	11181	1	1.9463	0.00010717	0.00041416	0.043494	182	3	1.9463	-3.96993
NCAPH2	4	0.60944	0.67153	1	12293	1	1.7485	0.00010847	0.00041934	0.043797	183	3	1.7485	-3.96469
FADS3	4	0.99989	0.9999	1	19020	0	1.3177	0.00011076	0.00042918	0.044581	184	4	1.3177	-3.95562
NIP7	4	0.99585	0.99594	1	18707	0	2.3653	0.0001133	0.00043851	0.045304	185	4	2.3653	-3.94577
GINS1	4	0.78738	0.79065	1	14443	1	2.1038	0.00011465	0.00044265	0.045486	186	3	2.1038	-3.94063
METTL3	4	0.99988	0.99989	1	19019	0	1.4177	0.00011512	0.00044576	0.04556	187	4	1.4177	-3.93885
PAICS	4	0.99988	0.99989	1	19018	0	1.7308	0.00011662	0.00045198	0.045812	188	4	1.7308	-3.93323
CCNA2	4	0.99988	0.99989	1	19017	0	1.8779	0.00011708	0.00045301	0.045812	189	4	1.8779	-3.93152
MDN1	4	0.99988	0.99989	1	19016	0	1.6837	0.00011819	0.00046182	0.046456	190	4	1.6837	-3.92742
SDHA	4	0.99988	0.99989	1	19015	0	1.408	0.00011842	0.00046803	0.046835	191	4	1.408	-3.92657
PTCD3	4	0.99988	0.99989	1	19014	0	1.7707	0.00011987	0.00047373	0.04703	192	4	1.7707	-3.92129
NDUFB5	4	0.99988	0.99989	1	19013	0	1.0251	0.00012079	0.00047684	0.04703	193	4	1.0251	-3.91797
C1orf109	4	0.77745	0.78234	1	14286	1	2.1112	0.00012356	0.00048306	0.04703	194	3	2.1112	-3.90812
EEF1A1	4	0.99988	0.99988	1	19011	0	2.1202	0.000124	0.00048409	0.04703	195	4	2.1202	-3.90658
WASH1	4	0.99988	0.99988	1	19010	0	2.541	0.000124	0.00048409	0.04703	196	4	2.541	-3.90658
HAUS5	4	0.99988	0.99988	1	19009	0	1.3682	0.00012482	0.00048617	0.04703	197	4	1.3682	-3.90372
RPL17	4	0.9978	0.99786	1	18810	0	2.3528	0.00012569	0.0004872	0.04703	198	4	2.3528	-3.9007
DDX47	4	0.90885	0.90883	1	16753	0	2.508	0.00012691	0.00049083	0.047142	199	3	2.508	-3.8965
IKBKAP	4	0.99911	0.99914	1	18901	0	1.8065	0.00012783	0.00049549	0.047351	200	4	1.8065	-3.89337
NUP98	4	0.98667	0.98675	1	18405	0	2.0406	0.00012829	0.00049808	0.047362	201	4	2.0406	-3.89181
EIF3I	4	0.88966	0.88968	1	16387	0	1.9337	0.00012976	0.0005043	0.047577	202	3	1.9337	-3.88686
ALG11	4	0.83768	0.83782	1	15321	0	2.2814	0.00013015	0.00050533	0.047577	203	3	2.2814	-3.88556
PMF1	4	0.83898	0.83911	1	15347	0	2.2917	0.00013065	0.00050792	0.047577	204	3	2.2917	-3.88389
SMAD4	4	0.99987	0.99988	1	19007	0	1.5098	0.00013154	0.00051181	0.047577	205	4	1.5098	-3.88094
PARP1	4	0.99987	0.99988	1	19006	0	1.415	0.00013218	0.00051414	0.047577	206	4	1.415	-3.87883
SDHD	4	0.68455	0.71549	1	13066	1	1.8418	0.00013281	0.00051569	0.047577	207	3	1.8418	-3.87677
IGBP1	4	0.91101	0.91097	1	16788	0	2.4166	0.0001336	0.00051776	0.047577	208	3	2.4166	-3.87419
PRPF38B	4	0.99986	0.99987	1	19005	0	1.2879	0.00013686	0.00053382	0.048731	209	4	1.2879	-3.86372
GNL3	4	0.98197	0.98206	1	18284	0	2.4698	0.0001372	0.0005359	0.048731	210	4	2.4698	-3.86265
EMG1	4	0.99985	0.99987	1	19004	0	1.6349	0.00013759	0.00053797	0.048731	211	4	1.6349	-3.86141
BIRC5	4	0.35332	0.49799	1	9184	1	3.3438	0.0001401	0.00054936	0.049528	212	3	3.3438	-3.85356
NLE1	4	0.9998	0.99982	1	18992	0	2.4256	0.00014141	0.00055403	0.049714	213	4	2.4256	-3.84952
AP2S1	4	0.99985	0.99986	1	19002	0	1.664	0.00014297	0.00055921	0.049944	214	4	1.664	-3.84476
MRPL44	4	0.67032	0.70666	1	12915	1	2.3343	0.00014673	0.00057112	0.050536	215	3	2.3343	-3.83348
MRPL18	4	0.2237	0.36537	1	6866	1	2.2202	0.00014673	0.00057112	0.050536	216	3	2.2202	-3.83348
RPS25	4	0.99985	0.99986	1	19003	0	2.4717	0.00014974	0.00058459	0.05149	217	4	2.4717	-3.82466
OGT	4	0.99954	0.99956	1	18952	0	2.1607	0.00015054	0.00058822	0.051571	218	4	2.1607	-3.82235
TFAM	4	0.56117	0.64674	1	11852	1	1.868	0.0001539	0.00060376	0.052471	219	3	1.868	-3.81276
HMGCS1	4	0.99984	0.99986	1	19001	0	1.7308	0.00015534	0.0006079	0.052471	220	4	1.7308	-3.80872
HAUS3	4	0.99984	0.99986	1	19000	0	2.6188	0.00015534	0.0006079	0.052471	221	4	2.6188	-3.80872
TMED10	4	0.97634	0.97648	1	18135	0	2.0537	0.00015643	0.00060946	0.052471	222	3	2.0537	-3.80568
RPL7	4	0.99899	0.99904	1	18891	0	2.4782	0.00015784	0.00061464	0.052679	223	4	2.4782	-3.80178
UTP23	4	0.65545	0.69769	1	12752	1	1.6077	0.00016176	0.00062966	0.053619	224	2	1.6077	-3.79113
CD3EAP	4	0.99984	0.99985	1	18999	0	1.9201	0.00016239	0.00063121	0.053619	225	4	1.9201	-3.78944
GFM1	4	0.99983	0.99985	1	18998	0	1.2263	0.00016602	0.00064416	0.054066	226	4	1.2263	-3.77984
ARCN1	4	0.99983	0.99985	1	18997	0	1.4038	0.00016644	0.00064468	0.054066	227	4	1.4038	-3.77874
PNPT1	4	0.99983	0.99985	1	18996	0	2.2456	0.00016663	0.0006452	0.054066	228	4	2.2456	-3.77825
PELP1	4	0.84139	0.84154	1	15414	0	2.0093	0.0001674	0.00064779	0.054066	229	3	2.0093	-3.77624
PPIL1	4	0.99952	0.99954	1	18948	0	1.7938	0.00016977	0.0006597	0.054821	230	4	1.7938	-3.77014
ALG1L2	4	0.77931	0.7839	1	14312	1	1.8551	0.00017067	0.00066333	0.054884	231	3	1.8551	-3.76784
GOLGA8K	4	0.99627	0.99637	1	18721	0	1.606	0.00017786	0.00068923	0.056781	232	4	1.606	-3.74992
C19orf52	4	0.82946	0.82959	1	15160	0	0.5689	0.00018077	0.00070166	0.057557	233	2	0.5689	-3.74287
GTPBP4	4	0.975	0.97515	1	18113	0	2.8185	0.00018171	0.00070581	0.05765	234	3	2.8185	-3.74062
SMARCA4	4	0.52914	0.63142	1	11558	1	1.3379	0.00018718	0.00072394	0.058595	235	3	1.3379	-3.72774
RPF2	4	0.99733	0.99741	1	18781	0	1.9832	0.00018738	0.00072394	0.058595	236	4	1.9832	-3.72728
HMBS	4	0.99981	0.99983	1	18994	0	1.1734	0.00018838	0.00072705	0.058595	237	4	1.1734	-3.72497
MRPL39	4	0.71037	0.73248	1	13398	1	2.1192	0.00018897	0.00072964	0.058595	238	3	2.1192	-3.72361
FDXR	4	0.10555	0.22489	0.983139	4364	2	1.6064	0.00019354	0.00075295	0.060214	239	2	1.6064	-3.71323
SRP14	4	0.9998	0.99982	1	18993	0	1.123	0.00019673	0.00076279	0.060747	240	4	1.123	-3.70613
KIAA1524	4	0.95649	0.95654	1	17695	0	1.7266	0.00019764	0.00076693	0.060823	241	3	1.7266	-3.70413
U2SURP	4	0.050685	0.12278	0.939388	2489	1	2.0453	0.00020343	0.00079076	0.062454	242	3	2.0453	-3.69159
GRPEL1	4	0.99921	0.99924	1	18916	0	2.1524	0.0002106	0.00082236	0.064682	243	4	2.1524	-3.67654
TOP1	4	0.90258	0.90259	1	16629	0	2.2166	0.00021506	0.0008379	0.065635	244	3	2.2166	-3.66744
RPS9	4	0.84541	0.84544	1	15494	0	2.2134	0.00021718	0.00084619	0.06588	245	3	2.2134	-3.66318
DPAGT1	4	0.99978	0.9998	1	18990	0	1.6471	0.00021815	0.00084826	0.06588	246	4	1.6471	-3.66124
VARS2	4	0.6886	0.71806	1	13126	1	2.4886	0.00021882	0.00085137	0.06588	247	3	2.4886	-3.65991
METTL16	4	0.81539	0.81584	1	14937	1	2.0287	0.00022135	0.00085552	0.065933	248	3	2.0287	-3.65492
WRB	4	0.97154	0.97166	1	18037	0	1.5969	0.00022412	0.00086173	0.066146	249	3	1.5969	-3.64952
SLC33A1	4	0.99977	0.99979	1	18989	0	1.4277	0.00022939	0.00088349	0.067048	250	4	1.4277	-3.63943
RPUSD4	4	0.98405	0.98417	1	18348	0	1.8859	0.0002295	0.00088349	0.067048	251	4	1.8859	-3.63922
PSTK	4	0.99115	0.99123	1	18545	0	1.8478	0.00022995	0.00088401	0.067048	252	4	1.8478	-3.63837
SSB	4	0.9752	0.97534	1	18118	0	1.6982	0.00023336	0.00089489	0.067605	253	3	1.6982	-3.63197
NCAPG	4	0.98748	0.98754	1	18425	0	1.6258	0.00023519	0.0009011	0.067806	254	4	1.6258	-3.62858
FBXO42	4	0.99976	0.99978	1	18988	0	1.5431	0.00023907	0.0009125	0.068394	255	4	1.5431	-3.62147
WDR70	4	0.98756	0.98762	1	18431	0	2.0318	0.00024297	0.0009239	0.068978	256	4	2.0318	-3.61445
ATP6AP2	4	0.83104	0.83119	1	15201	0	1.5538	0.00024521	0.00093374	0.069288	257	3	1.5538	-3.61046
RPL15	4	0.81981	0.8201	1	15012	1	2.0923	0.00024551	0.00093529	0.069288	258	3	2.0923	-3.60993
PCNA	4	0.83898	0.83911	1	15334	0	2.456	0.00024805	0.00094513	0.069554	259	3	2.456	-3.60546
AURKB	4	0.99975	0.99977	1	18986	0	1.3424	0.00024824	0.00094617	0.069554	260	4	1.3424	-3.60513
USP17L27	4	0.80317	0.80451	1	14696	1	1.8141	0.00025163	0.0009555	0.069971	261	3	1.8141	-3.59924
SMG6	4	0.99974	0.99976	1	18985	0	1.0859	0.00025609	0.00096948	0.070724	262	4	1.0859	-3.59161
PTK2	4	0.99974	0.99976	1	18984	0	0.97877	0.00025935	0.00098036	0.070976	263	4	0.97877	-3.58611
UBIAD1	4	0.99789	0.99795	1	18818	0	1.999	0.00025939	0.00098036	0.070976	264	4	1.999	-3.58605
RPS27	4	0.99974	0.99975	1	18983	0	2.3529	0.0002636	0.001	0.072043	265	4	2.3529	-3.57905
SNRNP35	4	0.92053	0.92055	1	17000	0	1.3902	0.00026408	0.0010026	0.072043	266	3	1.3902	-3.57826
CLNS1A	4	0.85145	0.85153	1	15617	0	1.8116	0.00027108	0.001027	0.073227	267	3	1.8116	-3.5669
SNRNP40	4	0.86311	0.86323	1	15858	0	2.1661	0.00027158	0.001028	0.073227	268	3	2.1661	-3.5661
CMPK1	4	0.80609	0.80719	1	14746	1	2.3584	0.00027247	0.0010306	0.073227	269	3	2.3584	-3.56468
SRSF11	4	0.99972	0.99975	1	18982	0	1.1096	0.00027511	0.001043	0.073836	270	4	1.1096	-3.56049
TPT1	4	0.99434	0.99442	1	18642	0	2.2275	0.00027666	0.0010472	0.073856	271	4	2.2275	-3.55805
USP7	4	0.99972	0.99974	1	18981	0	1.2072	0.00028157	0.0010658	0.074838	272	4	1.2072	-3.55041
SNRNP25	4	0.85413	0.85424	1	15672	0	2.037	0.00028232	0.0010689	0.074838	273	3	2.037	-3.54926
RNASEK	4	0.30082	0.44456	1	8244	2	-0.076683	0.00028406	0.0010767	0.0751	274	1	-0.076683	-3.54659
PDCD2	4	0.99917	0.9992	1	18909	0	2.7845	0.00028479	0.0010809	0.0751	275	4	2.7845	-3.54548
RNH1	4	0.99971	0.99973	1	18980	0	1.4682	0.00028586	0.0010845	0.0751	276	4	1.4682	-3.54385
TRAPPC4	4	0.98869	0.98876	1	18463	0	2.0051	0.0002899	0.001099	0.07583	277	4	2.0051	-3.53775
UBA6	4	0.9972	0.99729	1	18776	0	1.3424	0.00029228	0.0011099	0.076305	278	4	1.3424	-3.5342
HNRNPL	4	0.99709	0.99718	1	18767	0	1.8707	0.00029439	0.0011228	0.076919	279	4	1.8707	-3.53108
AMD1	4	0.55214	0.64235	1	11763	1	2.6136	0.000296	0.0011285	0.077033	280	3	2.6136	-3.52871
PPP6C	4	0.9997	0.99972	1	18977	0	2.677	0.00030008	0.0011446	0.077293	281	4	2.677	-3.52276
GNL3L	4	0.9997	0.99972	1	18976	0	1.1016	0.00030055	0.0011461	0.077293	282	4	1.1016	-3.52208
SARS	4	0.62819	0.68187	1	12479	1	2.1897	0.00030469	0.0011544	0.077293	283	3	2.1897	-3.51614
PDPK1	4	0.99903	0.99908	1	18895	0	1.5952	0.00030573	0.0011591	0.077293	284	4	1.5952	-3.51466
AURKAIP1	4	0.99969	0.99971	1	18974	0	0.98167	0.00030613	0.0011601	0.077293	285	4	0.98167	-3.51409
RNGTT	4	0.99969	0.99971	1	18973	0	1.5622	0.00030649	0.0011601	0.077293	286	4	1.5622	-3.51358
NELFCD	4	0.71004	0.73225	1	13392	1	2.3017	0.00030688	0.0011606	0.077293	287	3	2.3017	-3.51303
B3GAT3	4	0.99969	0.99971	1	18972	0	1.7219	0.00030955	0.0011705	0.077409	288	4	1.7219	-3.50927
ROMO1	4	0.87213	0.8722	1	16033	0	1.8475	0.00030963	0.0011705	0.077409	289	2	1.8475	-3.50916
TMED2	4	0.62203	0.67851	1	12428	1	1.8254	0.00031461	0.0011886	0.077987	290	3	1.8254	-3.50223
TIMELESS	4	0.97601	0.97616	1	18132	0	2.5329	0.0003151	0.0011912	0.077987	291	3	2.5329	-3.50155
DDOST	4	0.99968	0.9997	1	18971	0	1.2083	0.00031703	0.0011953	0.077987	292	4	1.2083	-3.4989
MEN1	4	0.97962	0.97975	1	18228	0	1.571	0.00031902	0.0012026	0.077987	293	3	1.571	-3.49618
CENPM	4	0.99968	0.9997	1	18970	0	1.469	0.00032011	0.0012047	0.077987	294	4	1.469	-3.4947
SRSF1	4	0.99968	0.9997	1	18969	0	2.3395	0.00032042	0.0012057	0.077987	295	4	2.3395	-3.49428
RPIA	4	0.11834	0.24724	0.986175	4771	1	2.3804	0.00032099	0.0012078	0.077987	296	3	2.3804	-3.49351
NOL6	4	0.94774	0.94779	1	17536	0	2.1608	0.00032666	0.0012321	0.079291	297	3	2.1608	-3.4859
SCGB1D2	4	0.99967	0.99969	1	18968	0	0.88272	0.00033024	0.001244	0.079789	298	4	0.88272	-3.48117
LAMTOR3	4	0.99963	0.99966	1	18962	0	2.3583	0.00033264	0.0012497	0.079887	299	4	2.3583	-3.47803
MOCS3	4	0.99966	0.99968	1	18967	0	1.7662	0.00033508	0.0012591	0.07991	300	4	1.7662	-3.47485
PSMD3	4	0.96319	0.96326	1	17855	0	2.0321	0.00033529	0.0012601	0.07991	301	3	2.0321	-3.47458
HARS2	4	0.99033	0.99043	1	18516	0	1.4152	0.00033645	0.0012632	0.07991	302	4	1.4152	-3.47308
THAP1	4	0.99966	0.99968	1	18966	0	1.2275	0.00033777	0.0012668	0.07991	303	4	1.2275	-3.47138
POLR1D	4	0.64346	0.69067	1	12622	1	1.795	0.00034649	0.0012927	0.081276	304	3	1.795	-3.46031
MRPL32	4	0.99965	0.99967	1	18965	0	1.4619	0.00034964	0.0013046	0.081756	305	4	1.4619	-3.45638
RPAP3	4	0.99965	0.99967	1	18964	0	1.4347	0.00035176	0.0013114	0.08191	306	4	1.4347	-3.45375
EIF1AX	4	0.78059	0.78496	1	14332	1	2.4252	0.0003542	0.0013238	0.082344	307	3	2.4252	-3.45075
ATP6V0D1	4	0.59914	0.666	1	12204	1	1.9056	0.00035705	0.0013326	0.082344	308	3	1.9056	-3.44727
ATP6V1D	4	0.1558	0.29581	1	5655	1	2.629	0.00035824	0.0013352	0.082344	309	3	2.629	-3.44583
MRPL52	4	0.36162	0.50643	1	9337	1	1.8398	0.00035858	0.0013362	0.082344	310	3	1.8398	-3.44541
TEX10	4	0.96991	0.97002	1	18002	0	1.5294	0.00035994	0.0013399	0.082344	311	3	1.5294	-3.44377
YKT6	4	0.93823	0.9382	1	17364	0	1.6854	0.00036991	0.0013813	0.084619	312	3	1.6854	-3.4319
SPATA5	4	0.99417	0.99427	1	18636	0	1.9388	0.00037441	0.0014005	0.085519	313	4	1.9388	-3.42665
RTN4IP1	4	0.99513	0.99523	1	18677	0	1.9226	0.00037975	0.0014269	0.086854	314	4	1.9226	-3.4205
RPS23	4	0.66264	0.70196	1	12829	1	2.156	0.00038724	0.0014497	0.087381	315	3	2.156	-3.41202
PRIM2	4	0.97463	0.97477	1	18104	0	1.7236	0.00038734	0.0014497	0.087381	316	3	1.7236	-3.41191
GPR89A	4	0.59278	0.66269	1	12136	1	1.6982	0.00038735	0.0014497	0.087381	317	3	1.6982	-3.4119
COG3	4	0.997	0.99709	1	18760	0	1.5477	0.00038799	0.0014538	0.087381	318	4	1.5477	-3.41118
FBL	4	0.99961	0.99963	1	18960	0	1.7737	0.00039184	0.0014668	0.087883	319	4	1.7737	-3.40689
TUBB8	4	0.9996	0.99962	1	18959	0	1.1018	0.00039835	0.0014937	0.089094	320	4	1.1018	-3.39974
ORAOV1	4	0.9996	0.99962	1	18958	0	1.6397	0.00039988	0.0014994	0.089094	321	4	1.6397	-3.39807
PNKP	4	0.9996	0.99962	1	18957	0	1.0966	0.00040025	0.001501	0.089094	322	4	1.0966	-3.39767
FDX1L	4	0.49641	0.61654	1	11297	1	2.3567	0.00040533	0.0015191	0.089764	323	3	2.3567	-3.39219
SKP1	4	0.12154	0.25277	0.986175	4858	2	1.3041	0.00040593	0.0015217	0.089764	324	2	1.3041	-3.39155
AARS	4	0.99944	0.99947	1	18941	0	1.3073	0.00040681	0.0015264	0.089764	325	4	1.3073	-3.39061
MARS	4	0.99533	0.99544	1	18681	0	2.2241	0.00041162	0.0015435	0.090491	326	4	2.2241	-3.3855
DHX15	4	0.96177	0.96187	1	17827	0	2.3356	0.0004148	0.0015595	0.090894	327	3	2.3356	-3.38216
CCNB1	4	0.43632	0.58336	1	10689	1	2.1295	0.00041607	0.0015637	0.090894	328	3	2.1295	-3.38083
TOP2A	4	0.96968	0.96977	1	17998	0	2.1827	0.00041644	0.0015652	0.090894	329	3	2.1827	-3.38045
CAPZB	4	0.97572	0.97588	1	18123	0	2.2285	0.00041735	0.0015694	0.090894	330	3	2.2285	-3.3795
PPP1R8	4	0.99544	0.99555	1	18684	0	2.2687	0.0004235	0.0015927	0.091966	331	4	2.2687	-3.37315
LRRC47	4	0.99956	0.99959	1	18956	0	1.0644	0.00043587	0.0016414	0.093927	332	4	1.0644	-3.36064
ZNHIT3	4	0.82067	0.82091	1	15028	1	2.4279	0.00043804	0.0016455	0.093927	333	3	2.4279	-3.35849
EIF2AK4	4	0.99172	0.9918	1	18566	0	1.733	0.00043943	0.0016486	0.093927	334	4	1.733	-3.35711
C17orf89	4	0.99956	0.99958	1	18955	0	0.86101	0.00043986	0.0016496	0.093927	335	4	0.86101	-3.35669
CHORDC1	4	0.99667	0.99677	1	18741	0	2.0492	0.00044066	0.0016512	0.093927	336	4	2.0492	-3.3559
DHFR	4	0.99955	0.99958	1	18954	0	1.9043	0.00044522	0.0016657	0.094293	337	4	1.9043	-3.35143
MCM5	4	0.99955	0.99958	1	18953	0	1.5389	0.00044625	0.0016693	0.094293	338	4	1.5389	-3.35042
FNBP4	4	0.92257	0.92264	1	17036	0	1.2821	0.00044692	0.0016724	0.094293	339	3	1.2821	-3.34977
ACTL6A	4	0.41512	0.56158	1	10313	2	1.1641	0.00044858	0.0016781	0.094336	340	2	1.1641	-3.34816
SARS2	4	0.98882	0.98889	1	18467	0	2.1547	0.00045789	0.0017123	0.095976	341	4	2.1547	-3.33924
MRPL10	4	0.9979	0.99795	1	18819	0	1.4247	0.00046109	0.0017237	0.096282	342	4	1.4247	-3.33621
RPN2	4	0.96366	0.96373	1	17864	0	2.2295	0.00046181	0.0017279	0.096282	343	3	2.2295	-3.33554
NUDCD3	4	0.66471	0.70321	1	12856	1	1.585	0.00046595	0.0017434	0.096866	344	3	1.585	-3.33166
NAT10	4	0.75041	0.76108	1	13901	1	1.915	0.00046846	0.0017574	0.09736	345	3	1.915	-3.32933
GUK1	4	0.99953	0.99955	1	18951	0	1.4298	0.00046961	0.0017636	0.097422	346	4	1.4298	-3.32826
APITD1-CORT	4	0.99953	0.99954	1	18949	0	0.84321	0.00047382	0.001776	0.097826	347	4	0.84321	-3.32439
ZBTB17	4	0.92835	0.92831	1	17149	0	1.8664	0.00047818	0.0017937	0.098512	348	3	1.8664	-3.32041
SDHC	4	0.72306	0.7412	1	13534	1	1.7213	0.00048031	0.0018019	0.098684	349	3	1.7213	-3.31848
RPL11	4	0.97915	0.97929	1	18210	0	2.2611	0.00048178	0.0018092	0.098798	350	3	2.2611	-3.31715
AP2M1	4	0.75285	0.76294	1	13938	1	1.2676	0.00048548	0.0018242	0.099334	351	3	1.2676	-3.31383
VPS53	4	0.99633	0.99643	1	18724	0	1.2337	0.00048993	0.0018416	0.099994	352	4	1.2337	-3.30987
SS18L2	4	0.99749	0.99756	1	18792	0	1.9347	0.00049194	0.0018496	0.100146	353	4	1.9347	-3.30809
ATP1B3	4	0.9995	0.99952	1	18946	0	0.95647	0.00050006	0.0018846	0.101506	354	4	0.95647	-3.30098
ARPC5	4	0.9995	0.99952	1	18945	0	0.87556	0.00050024	0.0018853	0.101506	355	4	0.87556	-3.30082
CPSF4	4	0.47275	0.60628	1	11114	1	1.3205	0.0005059	0.0019092	0.1025	356	3	1.3205	-3.29594
RNPS1	4	0.99545	0.99556	1	18687	0	1.735	0.00051935	0.0019553	0.104681	357	4	1.735	-3.28454
NOM1	4	0.96591	0.96603	1	17915	0	1.8131	0.00052576	0.0019739	0.105385	358	2	1.8131	-3.27921
STRAP	4	0.99946	0.99949	1	18943	0	1.3089	0.0005387	0.0020206	0.107573	359	4	1.3089	-3.26865
KRI1	4	0.34883	0.49343	1	9107	1	0.69884	0.00054224	0.0020366	0.108127	360	3	0.69884	-3.26581
NOL12	4	0.99945	0.99948	1	18942	0	1.1614	0.00054743	0.0020573	0.108624	361	4	1.1614	-3.26167
FNTA	4	0.98222	0.98231	1	18290	0	1.6163	0.00054746	0.0020573	0.108624	362	4	1.6163	-3.26165
TLN1	4	0.99944	0.99947	1	18940	0	1.3926	0.00055552	0.0020889	0.109904	363	4	1.3926	-3.2553
LCN8	4	0.99944	0.99947	1	18939	0	0.99881	0.00055673	0.0020931	0.109904	364	4	0.99881	-3.25436
NBPF10	4	0.99944	0.99947	1	18938	0	1.9076	0.00055955	0.0021024	0.110091	365	4	1.9076	-3.25216
E4F1	4	0.99943	0.99946	1	18937	0	1.3069	0.00056539	0.0021236	0.110899	366	4	1.3069	-3.24765
MOB4	4	0.97231	0.97244	1	18057	0	1.9738	0.00057189	0.0021438	0.111447	367	3	1.9738	-3.24269
GTF2H4	4	0.87309	0.87317	1	16049	0	1.4966	0.00057271	0.002149	0.111447	368	3	1.4966	-3.24207
DPH3	4	0.99881	0.99886	1	18876	0	1.7107	0.00057354	0.0021516	0.111447	369	4	1.7107	-3.24144
SRM	4	0.62263	0.67885	1	12432	1	1.1929	0.00058686	0.0022096	0.113861	370	3	1.1929	-3.23147
TPCN1	4	0.99941	0.99944	1	18936	0	0.88521	0.00058691	0.0022101	0.113861	371	4	0.88521	-3.23143
PDAP1	4	0.99941	0.99943	1	18935	0	0.84125	0.00059415	0.0022376	0.114966	372	4	0.84125	-3.2261
GRSF1	4	0.87219	0.87226	1	16035	0	1.708	0.00059698	0.002248	0.115145	373	3	1.708	-3.22404
LSM12	4	0.99789	0.99795	1	18817	0	1.4434	0.00059825	0.0022531	0.115145	374	4	1.4434	-3.22312
CDC37	4	0.9746	0.97475	1	18103	0	1.8749	0.00060131	0.0022651	0.115428	375	3	1.8749	-3.2209
RPS19	4	0.51935	0.62693	1	11483	1	1.8485	0.00060285	0.0022708	0.115428	376	3	1.8485	-3.21979
LONP1	4	0.76847	0.77504	1	14157	1	1.2987	0.00060592	0.0022837	0.115779	377	3	1.2987	-3.21758
SLMO2	4	0.70342	0.72782	1	13307	1	1.3403	0.00061672	0.0023298	0.11778	378	2	1.3403	-3.20991
UBA1	4	0.99938	0.99941	1	18934	0	1.9068	0.00061748	0.0023355	0.11778	379	4	1.9068	-3.20938
ARL2	4	0.99938	0.99941	1	18933	0	1.3046	0.00062113	0.0023482	0.118108	380	4	1.3046	-3.20682
IMPDH2	4	0.98983	0.9899	1	18499	0	1.3573	0.00062321	0.0023578	0.118279	381	4	1.3573	-3.20537
AHCY	4	0.99246	0.99254	1	18581	0	1.6553	0.00062449	0.002364	0.118281	382	4	1.6553	-3.20447
MRPL17	4	0.99937	0.9994	1	18931	0	1.3415	0.0006292	0.0023842	0.11898	383	4	1.3415	-3.20121
EIF2B4	4	0.99936	0.99939	1	18930	0	0.93373	0.00064004	0.0024236	0.12063	384	4	0.93373	-3.19379
ESRRA	4	0.98568	0.98575	1	18384	0	0.65847	0.0006455	0.0024427	0.120937	385	4	0.65847	-3.1901
KCND1	4	0.99779	0.99785	1	18809	0	1.5812	0.0006475	0.0024505	0.120937	386	4	1.5812	-3.18876
FARS2	4	0.99935	0.99938	1	18929	0	1.2404	0.00065007	0.0024588	0.120937	387	4	1.2404	-3.18704
CSK	4	0.99935	0.99938	1	18928	0	1.1621	0.00065028	0.0024593	0.120937	388	4	1.1621	-3.1869
DPF2	4	0.92604	0.92599	1	17105	0	1.2409	0.00065109	0.0024614	0.120937	389	3	1.2409	-3.18636
CDC123	4	0.91255	0.9125	1	16819	0	1.4878	0.00065925	0.002492	0.121889	390	3	1.4878	-3.18095
CFAP20	4	0.99828	0.99834	1	18841	0	1.5042	0.00065965	0.0024935	0.121889	391	4	1.5042	-3.18069
SBNO1	4	0.96834	0.96843	1	17976	0	1.8752	0.00066246	0.0025013	0.121956	392	3	1.8752	-3.17884
COA5	4	0.93046	0.93035	1	17194	0	1.5887	0.00066829	0.0025241	0.122755	393	3	1.5887	-3.17504
MALSU1	4	0.99168	0.99175	1	18564	0	1.7335	0.00067213	0.0025406	0.123061	394	4	1.7335	-3.17255
ZW10	4	0.97415	0.97428	1	18096	0	1.4525	0.00067287	0.0025432	0.123061	395	3	1.4525	-3.17207
NARS2	4	0.97968	0.9798	1	18230	0	2.0519	0.00067793	0.0025609	0.1236	396	3	2.0519	-3.16882
DDX21	4	0.99932	0.99935	1	18926	0	2.0978	0.00068394	0.0025779	0.123924	397	4	2.0978	-3.16498
UBE2N	4	0.99931	0.99934	1	18925	0	1.3479	0.00068503	0.0025805	0.123924	398	4	1.3479	-3.16429
COPS6	4	0.772	0.77783	1	14206	1	1.4766	0.00068839	0.0025914	0.124135	399	3	1.4766	-3.16217
TTC17	4	0.34422	0.48872	1	9023	2	-0.10757	0.00069712	0.0026189	0.125136	400	2	-0.10757	-3.15669
ATG9A	4	0.52024	0.62733	1	11496	1	1.896	0.00071594	0.002679	0.127688	401	3	1.896	-3.14512
MFAP1	4	0.83997	0.8401	1	15376	0	2.0357	0.00071834	0.0026914	0.127962	402	3	2.0357	-3.14367
GNB2L1	4	0.99554	0.99564	1	18694	0	1.9778	0.00072458	0.0027116	0.128602	403	4	1.9778	-3.13991
FAU	4	0.93386	0.93381	1	17255	0	1.6942	0.00073579	0.0027551	0.129732	404	3	1.6942	-3.13325
RFK	4	0.99926	0.99929	1	18923	0	1.0318	0.00073582	0.0027551	0.129732	405	4	1.0318	-3.13323
RBM10	4	0.99263	0.99271	1	18587	0	1.4627	0.00073668	0.0027572	0.129732	406	4	1.4627	-3.13272
MRPS2	4	0.57717	0.65475	1	11987	1	1.5744	0.00073918	0.002765	0.129732	407	3	1.5744	-3.13125
NPIPA2	4	0.99439	0.99447	1	18644	0	1.6433	0.00074342	0.0027769	0.129732	408	4	1.6433	-3.12877
ATP2A2	4	0.99925	0.99928	1	18922	0	1.816	0.00074626	0.0027865	0.129732	409	4	1.816	-3.12711
RPS15	4	0.99925	0.99928	1	18921	0	1.8781	0.00074906	0.002795	0.129732	410	4	1.8781	-3.12548
SLC25A26	4	0.72078	0.7396	1	13507	1	1.5717	0.00075023	0.0027986	0.129732	411	3	1.5717	-3.12481
NAA10	4	0.99925	0.99928	1	18920	0	1.0793	0.00075093	0.0028028	0.129732	412	4	1.0793	-3.1244
IL22RA1	4	0.99925	0.99928	1	18919	0	0.95144	0.0007514	0.0028033	0.129732	413	4	0.95144	-3.12413
NDOR1	4	0.99925	0.99928	1	18918	0	1.1506	0.00075387	0.0028121	0.129825	414	4	1.1506	-3.1227
PMM2	4	0.80089	0.80248	1	14664	1	1.5031	0.00075831	0.0028271	0.129888	415	3	1.5031	-3.12015
NOP16	4	0.89604	0.89606	1	16519	0	1.5039	0.00076051	0.0028328	0.129888	416	3	1.5039	-3.1189
VPS33A	4	0.99701	0.9971	1	18761	0	1.1504	0.00076079	0.0028338	0.129888	417	4	1.1504	-3.11874
C9orf114	4	0.99921	0.99924	1	18915	0	1.4048	0.00076802	0.0028582	0.130691	418	4	1.4048	-3.11463
PYROXD1	4	0.99189	0.99196	1	18568	0	1.3866	0.00077258	0.0028753	0.131159	419	4	1.3866	-3.11206
PES1	4	0.79432	0.79661	1	14547	1	1.4748	0.00077952	0.0029059	0.132237	420	3	1.4748	-3.10817
RPL19	4	0.99704	0.99714	1	18763	0	2.0342	0.000783	0.0029245	0.13277	421	4	2.0342	-3.10624
METAP2	4	0.85444	0.85453	1	15680	0	1.6676	0.00078999	0.0029499	0.133337	422	3	1.6676	-3.10238
AFG3L2	4	0.93065	0.93054	1	17197	0	1.5777	0.00079101	0.0029535	0.133337	423	3	1.5777	-3.10182
EIF2S2	4	0.97827	0.97841	1	18177	0	1.8744	0.00079262	0.0029597	0.133337	424	3	1.8744	-3.10093
YRDC	4	0.99895	0.999	1	18888	0	2.153	0.00079407	0.0029649	0.133337	425	4	2.153	-3.10014
XPO5	4	0.96173	0.96182	1	17825	0	1.7871	0.00079919	0.0029805	0.133721	426	3	1.7871	-3.09735
NDUFB10	4	0.78479	0.78841	1	14399	1	1.2508	0.00080228	0.0029944	0.134034	427	3	1.2508	-3.09567
ASNS	4	0.99917	0.99921	1	18911	0	1.8144	0.00080951	0.0030177	0.13461	428	4	1.8144	-3.09178
PMF1-BGLAP	4	0.99919	0.99922	1	18914	0	1.3986	0.00081137	0.0030214	0.13461	429	4	1.3986	-3.09078
BUB1B	4	0.9001	0.90013	1	16579	0	1.031	0.0008173	0.0030468	0.135425	430	3	1.031	-3.08762
CCAR1	4	0.99918	0.99921	1	18913	0	0.93306	0.00082097	0.0030639	0.135869	431	4	0.93306	-3.08567
EIF3B	4	0.99917	0.99921	1	18912	0	1.9081	0.00082738	0.0030934	0.136654	432	4	1.9081	-3.08229
YARS	4	0.94038	0.94036	1	17412	0	1.8453	0.00083076	0.0031053	0.136654	433	3	1.8453	-3.08052
UHRF1	4	0.99917	0.9992	1	18910	0	1.4367	0.00083446	0.0031136	0.136654	434	4	1.4367	-3.07859
TAMM41	4	0.99821	0.99826	1	18837	0	1.8689	0.00083525	0.0031177	0.136654	435	4	1.8689	-3.07818
IARS2	4	0.9891	0.98919	1	18474	0	1.8035	0.00083673	0.0031224	0.136654	436	4	1.8035	-3.07741
ATP6V1A	4	0.99916	0.9992	1	18908	0	1.8493	0.00083738	0.0031245	0.136654	437	4	1.8493	-3.07708
ALDOA	4	0.99738	0.99745	1	18786	0	1.5154	0.00084256	0.0031374	0.136907	438	4	1.5154	-3.0744
ATP6V1C1	4	0.95265	0.95277	1	17622	0	1.8698	0.00084682	0.0031483	0.137069	439	3	1.8698	-3.07221
ZWINT	4	0.99914	0.99918	1	18907	0	0.96043	0.0008557	0.0031856	0.138334	440	4	0.96043	-3.06768
TRIT1	4	0.99914	0.99918	1	18906	0	1.7476	0.00085842	0.0031954	0.138334	441	4	1.7476	-3.0663
UTP20	4	0.39058	0.53607	1	9875	2	1.014	0.00085972	0.0031991	0.138334	442	2	1.014	-3.06564
THOC6	4	0.99913	0.99917	1	18905	0	1.009	0.00086857	0.0032296	0.13934	443	4	1.009	-3.0612
C21orf59	4	0.81695	0.81732	1	14967	1	1.2288	0.00088032	0.003269	0.140721	444	3	1.2288	-3.05536
TOMM20	4	0.94497	0.94502	1	17492	0	1.6006	0.00088306	0.0032794	0.14085	445	3	1.6006	-3.05401
ALG1	4	0.99912	0.99915	1	18903	0	1.6041	0.00088462	0.0032871	0.140867	446	4	1.6041	-3.05324
SMU1	4	0.99395	0.99403	1	18624	0	2.1434	0.00089794	0.0033384	0.142745	447	4	2.1434	-3.04675
SEPSECS	4	0.95561	0.95566	1	17680	0	0.30986	0.00090361	0.0033534	0.142969	448	2	0.30986	-3.04402
HARS	4	0.99651	0.99662	1	18733	0	1.8274	0.000906	0.0033586	0.142969	449	4	1.8274	-3.04287
BPTF	4	0.83466	0.8348	1	15274	0	1.2018	0.00091383	0.0033809	0.143334	450	3	1.2018	-3.03913
NOC4L	4	0.99908	0.99911	1	18900	0	1.1844	0.00091603	0.0033876	0.143334	451	4	1.1844	-3.03809
RPS12	4	0.99908	0.99911	1	18899	0	1.7139	0.00091657	0.0033897	0.143334	452	4	1.7139	-3.03783
TRRAP	4	0.9979	0.99796	1	18820	0	1.4791	0.00092098	0.0034094	0.143848	453	4	1.4791	-3.03575
DHX35	4	0.99907	0.9991	1	18898	0	1.4062	0.00092805	0.0034327	0.144457	454	4	1.4062	-3.03243
SERPINB8	4	0.99907	0.9991	1	18897	0	0.73568	0.00092915	0.0034389	0.144457	455	4	0.73568	-3.03191
CAD	4	0.31151	0.45547	1	8424	1	1.8664	0.00093805	0.0034757	0.145681	456	3	1.8664	-3.02777
KLHL42	4	0.99905	0.99908	1	18896	0	1.1571	0.00095414	0.0035384	0.147984	457	4	1.1571	-3.02039
SMC5	4	0.98914	0.98924	1	18476	0	2.117	0.00096104	0.0035648	0.148763	458	4	2.117	-3.01726
ELP5	4	0.43482	0.58185	1	10658	1	1.1272	0.00097265	0.0035995	0.149885	459	3	1.1272	-3.01204
SOD2	4	0.99902	0.99907	1	18894	0	1.1268	0.00097749	0.0036145	0.150183	460	4	1.1268	-3.00989
SRSF2	4	0.88292	0.88298	1	16263	0	2.6781	0.00098042	0.0036238	0.150244	461	3	2.6781	-3.00859
WDR74	4	0.56265	0.64747	1	11862	1	2.3242	0.00099213	0.0036565	0.150787	462	3	2.3242	-3.00343
RPL38	4	0.93338	0.93334	1	17246	0	1.9593	0.00099248	0.003657	0.150787	463	3	1.9593	-3.00328
FNTB	4	0.99901	0.99905	1	18893	0	1.0211	0.00099357	0.0036606	0.150787	464	4	1.0211	-3.0028
TMCO6	4	0.999	0.99905	1	18892	0	1.3829	0.00099806	0.0036767	0.151075	465	4	1.3829	-3.00084
CDK7	4	0.70586	0.72942	1	13334	1	1.9456	0.00099998	0.0036834	0.151075	466	3	1.9456	-3.00001
ATP6V1F	4	0.25044	0.39271	1	7356	2	1.0631	0.0010049	0.0037057	0.151663	467	2	1.0631	-2.99788
PMPCA	4	0.98877	0.98883	1	18465	0	1.7052	0.0010085	0.0037176	0.151826	468	4	1.7052	-2.99632
CNOT1	4	0.99899	0.99904	1	18890	0	1.5108	0.0010135	0.0037357	0.152149	469	4	1.5108	-2.99418
PKM	4	0.97988	0.98	1	18233	0	1.9869	0.0010151	0.0037414	0.152149	470	3	1.9869	-2.99349
XRCC5	4	0.99896	0.99901	1	18889	0	1.4219	0.0010387	0.0038264	0.155112	471	4	1.4219	-2.98351
TRAPPC13	4	0.79811	0.79999	1	14622	1	1.6361	0.0010397	0.0038305	0.155112	472	3	1.6361	-2.98309
NUDT21	4	0.97829	0.97843	1	18178	0	1.7838	0.0010699	0.0039378	0.158864	473	3	1.7838	-2.97066
PITRM1	4	0.99893	0.99898	1	18887	0	1.0517	0.001073	0.0039466	0.158864	474	4	1.0517	-2.9694
TPR	4	0.99893	0.99898	1	18886	0	0.84982	0.0010735	0.0039481	0.158864	475	4	0.84982	-2.9692
DDX6	4	0.99892	0.99897	1	18885	0	1.27	0.0010799	0.0039678	0.159321	476	4	1.27	-2.96662
DCTN6	4	0.89297	0.89298	1	16459	0	2.4516	0.0010852	0.003989	0.159838	477	3	2.4516	-2.96449
CCDC101	4	0.96776	0.96785	1	17963	0	1.0986	0.0010939	0.0040248	0.160824	478	3	1.0986	-2.96102
CDK1	4	0.94155	0.94155	1	17432	0	2.0262	0.0010955	0.0040305	0.160824	479	3	2.0262	-2.96039
UBA3	4	0.99888	0.99893	1	18884	0	0.95636	0.0011186	0.0040968	0.162893	480	4	0.95636	-2.95133
RPL23	4	0.14767	0.28745	0.994177	5527	2	0.62511	0.0011193	0.0040994	0.162893	481	2	0.62511	-2.95105
ICE2	4	0.90755	0.90751	1	16728	0	2.0379	0.0011271	0.0041289	0.163726	482	3	2.0379	-2.94804
CHD4	4	0.99887	0.99892	1	18883	0	1.4287	0.0011326	0.0041501	0.163979	483	4	1.4287	-2.94592
FOLH1	4	0.9977	0.99775	1	18800	0	1.6346	0.0011354	0.0041595	0.163979	484	4	1.6346	-2.94485
NPIPB6	4	0.99886	0.99892	1	18882	0	1.4425	0.0011367	0.004161	0.163979	485	4	1.4425	-2.94435
RPL21	4	0.99886	0.99891	1	18881	0	1.2644	0.0011401	0.004176	0.164188	486	4	1.2644	-2.94306
FAM122A	4	0.99886	0.99891	1	18880	0	1.1772	0.0011431	0.0041864	0.164188	487	4	1.1772	-2.94192
RTTN	4	0.89751	0.8975	1	16538	0	1.2094	0.0011445	0.0041921	0.164188	488	3	1.2094	-2.94138
TAF6L	4	0.99885	0.9989	1	18879	0	1.3443	0.0011504	0.0042149	0.164743	489	4	1.3443	-2.93915
EIF5A	4	0.99884	0.9989	1	18878	0	1.6902	0.0011551	0.0042299	0.164993	490	4	1.6902	-2.93738
USO1	4	0.83433	0.83446	1	15263	0	2.0997	0.0011654	0.0042646	0.166008	491	3	2.0997	-2.93352
VARS	4	0.96676	0.96686	1	17936	0	1.8417	0.0011875	0.0043444	0.16877	492	3	1.8417	-2.92537
SRP9	4	0.1126	0.23731	0.986175	4592	1	1.2832	0.0011999	0.00439	0.170111	493	3	1.2832	-2.92085
UBR2	4	0.9988	0.99885	1	18875	0	0.73175	0.001202	0.0043967	0.170111	494	4	0.73175	-2.9201
SURF6	4	0.9988	0.99885	1	18874	0	1.4484	0.0012049	0.0044076	0.170187	495	4	1.4484	-2.91905
TIMM13	4	0.90741	0.90738	1	16725	0	1.5576	0.0012073	0.00442	0.170259	496	3	1.5576	-2.91818
EIF3F	4	0.87761	0.87764	1	16152	0	1.4094	0.0012094	0.0044273	0.170259	497	3	1.4094	-2.91743
FCGR1A	4	0.99878	0.99883	1	18873	0	1.1469	0.0012178	0.004462	0.171249	498	4	1.1469	-2.91442
CDC42	4	0.99878	0.99882	1	18872	0	1.4099	0.0012218	0.0044791	0.171561	499	4	1.4099	-2.913
MTERF3	4	0.99877	0.99882	1	18871	0	0.80041	0.0012272	0.0044983	0.17195	500	4	0.80041	-2.91108
GET4	4	0.91238	0.91235	1	16815	0	1.6975	0.0012473	0.004576	0.174311	501	3	1.6975	-2.90403
NBPF15	4	0.45035	0.59668	1	10938	1	1.9701	0.0012495	0.0045858	0.174311	502	3	1.9701	-2.90326
CENPW	4	0.65933	0.69997	1	12797	1	1.7002	0.0012502	0.0045874	0.174311	503	3	1.7002	-2.90302
GOLGA6C	4	0.85368	0.85378	1	15660	0	1.4822	0.001255	0.0046024	0.174534	504	3	1.4822	-2.90136
EEF1G	4	0.61913	0.67692	1	12394	1	1.4076	0.0012649	0.0046381	0.17539	505	2	1.4076	-2.89794
MRPL12	4	0.99873	0.99879	1	18870	0	1.1223	0.0012665	0.0046433	0.17539	506	4	1.1223	-2.89739
SNRPB	4	0.19736	0.33851	1	6364	1	2.0306	0.0012737	0.0046713	0.175752	507	3	2.0306	-2.89493
CARS	4	0.46451	0.6027	1	11047	1	1.5936	0.0012738	0.0046713	0.175752	508	3	1.5936	-2.8949
TAF4	4	0.99872	0.99877	1	18869	0	0.98781	0.0012778	0.0046889	0.175941	509	4	0.98781	-2.89354
MCAT	4	0.99417	0.99426	1	18635	0	1.1085	0.0012821	0.0047029	0.175941	510	4	1.1085	-2.89208
MLST8	4	0.99872	0.99876	1	18868	0	0.99784	0.0012823	0.0047039	0.175941	511	4	0.99784	-2.89201
FXN	4	0.99871	0.99876	1	18867	0	1.0375	0.0012876	0.0047231	0.176282	512	4	1.0375	-2.89022
GTPBP8	4	0.6096	0.67162	1	12296	1	1.295	0.0012913	0.0047329	0.176282	513	3	1.295	-2.88897
DDX28	4	0.99871	0.99875	1	18866	0	1.2627	0.0012932	0.0047407	0.176282	514	4	1.2627	-2.88833
PPIH	4	0.99553	0.99563	1	18693	0	1.4605	0.001299	0.0047599	0.176558	515	4	1.4605	-2.88639
ARPC3	4	0.84104	0.8412	1	15404	0	1.6526	0.0013018	0.0047666	0.176558	516	3	1.6526	-2.88546
RCL1	4	0.4575	0.59968	1	10996	1	1.0973	0.0013049	0.0047785	0.176657	517	2	1.0973	-2.88442
TFIP11	4	0.99868	0.99873	1	18865	0	1.0552	0.0013191	0.0048236	0.177979	518	4	1.0552	-2.87972
NARFL	4	0.99764	0.9977	1	18798	0	1.8259	0.001324	0.0048417	0.178304	519	4	1.8259	-2.87811
UROD	4	0.99833	0.99838	1	18843	0	1.443	0.0013342	0.0048754	0.179198	520	4	1.443	-2.87478
PIGM	4	0.99865	0.99869	1	18864	0	1.4174	0.0013487	0.0049199	0.180489	521	4	1.4174	-2.87008
CRNKL1	4	0.45643	0.59921	1	10987	1	2.1809	0.0013535	0.004937	0.18057	522	3	2.1809	-2.86854
RBBP5	4	0.99864	0.99868	1	18863	0	1.0188	0.0013569	0.0049495	0.18057	523	4	1.0188	-2.86745
NHLRC2	4	0.99864	0.99868	1	18862	0	1.3014	0.0013574	0.0049505	0.18057	524	4	1.3014	-2.86729
PGLS	4	0.58451	0.65843	1	12061	1	1.8352	0.0013649	0.0049769	0.180919	525	3	1.8352	-2.8649
YAP1	4	0.99863	0.99868	1	18861	0	1.4778	0.0013659	0.004979	0.180919	526	4	1.4778	-2.86458
TBCE	4	0.99863	0.99867	1	18860	0	1.6627	0.0013721	0.0049987	0.18129	527	4	1.6627	-2.86261
EXTL3	4	0.99841	0.99845	1	18847	0	1.1385	0.0013885	0.0050562	0.183028	528	4	1.1385	-2.85745
RPL36	4	0.92618	0.92613	1	17108	0	1.929	0.0014006	0.0050971	0.18416	529	3	1.929	-2.85369
LARS	4	0.9986	0.99864	1	18859	0	1.8889	0.0014044	0.0051121	0.184268	530	4	1.8889	-2.85251
RPS3A	4	0.99859	0.99863	1	18858	0	1.7764	0.0014076	0.0051194	0.184268	531	4	1.7764	-2.85152
ADSL	4	0.99472	0.9948	1	18659	0	1.3624	0.0014197	0.0051593	0.185355	532	4	1.3624	-2.8478
NMD3	4	0.93595	0.93589	1	17298	0	1.1676	0.0014356	0.0052282	0.187478	533	3	1.1676	-2.84297
TP53RK	4	0.9637	0.96377	1	17865	0	2.0615	0.0014403	0.0052473	0.187575	534	3	2.0615	-2.84155
MRPL15	4	0.75261	0.76274	1	13933	1	1.2544	0.0014427	0.0052566	0.187575	535	2	1.2544	-2.84082
UQCR10	4	0.834	0.83414	1	15256	0	1.0878	0.001445	0.0052644	0.187575	536	3	1.0878	-2.84013
KLF1	4	0.99855	0.9986	1	18857	0	0.68537	0.0014465	0.0052701	0.187575	537	4	0.68537	-2.83968
ZNF334	4	0.12214	0.25382	0.986175	4880	1	1.1201	0.0014543	0.0053007	0.187981	538	3	1.1201	-2.83735
DDX46	4	0.83293	0.83307	1	15238	0	1.9212	0.0014545	0.0053012	0.187981	539	3	1.9212	-2.83729
NRBP1	4	0.83031	0.83045	1	15183	0	1.3334	0.0014592	0.0053157	0.188146	540	3	1.3334	-2.83589
NDUFAF1	4	0.76722	0.77401	1	14144	1	1.8356	0.0014711	0.0053592	0.188199	541	3	1.8356	-2.83236
LSM11	4	0.99853	0.99857	1	18856	0	1.1354	0.0014715	0.0053618	0.188199	542	4	1.1354	-2.83224
HOXC4	4	0.99853	0.99857	1	18855	0	0.62818	0.0014731	0.005367	0.188199	543	4	0.62818	-2.83177
PRPF40A	4	0.48622	0.61204	1	11211	1	1.6737	0.0014834	0.0053975	0.188199	544	3	1.6737	-2.82874
TSR2	4	0.95798	0.95803	1	17734	0	1.9045	0.0014861	0.0054058	0.188199	545	3	1.9045	-2.82795
COX4I1	4	0.9313	0.93125	1	17209	0	1.7804	0.0014872	0.00541	0.188199	546	3	1.7804	-2.82763
COG8	4	0.76935	0.77573	1	14167	1	1.3093	0.0014877	0.0054115	0.188199	547	3	1.3093	-2.82748
RAD1	4	0.9639	0.96399	1	17870	0	1.1626	0.0014892	0.0054203	0.188199	548	3	1.1626	-2.82705
YPEL5	4	0.9985	0.99854	1	18854	0	0.81799	0.0014971	0.0054457	0.188199	549	4	0.81799	-2.82475
LARS2	4	0.58149	0.6569	1	12035	1	1.176	0.0014973	0.0054457	0.188199	550	3	1.176	-2.82469
MRPS14	4	0.7229	0.74108	1	13531	1	1.9285	0.0014981	0.0054473	0.188199	551	3	1.9285	-2.82446
ABCF1	4	0.9985	0.99853	1	18853	0	1.5249	0.0015013	0.0054576	0.188199	552	4	1.5249	-2.82353
PARS2	4	0.98886	0.98893	1	18468	0	1.5252	0.0015045	0.0054706	0.188199	553	4	1.5252	-2.82261
BOLA3	4	0.99824	0.99829	1	18840	0	1.7199	0.001507	0.0054778	0.188199	554	4	1.7199	-2.82189
TMEM88B	4	0.99849	0.99853	1	18852	0	0.79534	0.001508	0.0054851	0.188199	555	4	0.79534	-2.8216
QARS	4	0.84801	0.84811	1	15550	0	2.0773	0.0015105	0.0054949	0.188199	556	3	2.0773	-2.82088
GPI	4	0.99849	0.99852	1	18851	0	1.1308	0.0015115	0.005497	0.188199	557	4	1.1308	-2.82059
ACTB	4	0.99849	0.99852	1	18850	0	1.0488	0.0015127	0.0055012	0.188199	558	4	1.0488	-2.82025
UGT2A2	4	0.98039	0.98054	1	18245	0	1.1037	0.0015136	0.0055043	0.188199	559	3	1.1037	-2.81999
TUBE1	4	0.19534	0.33645	1	6328	1	1.1741	0.0015246	0.0055442	0.189081	560	3	1.1741	-2.81684
CLTC	4	0.14588	0.28564	0.992815	5501	1	1.6493	0.0015262	0.0055498	0.189081	561	3	1.6493	-2.81639
ACTR2	4	0.99808	0.99814	1	18826	0	1.4639	0.0015334	0.0055757	0.189625	562	4	1.4639	-2.81434
SIN3A	4	0.95974	0.95979	1	17774	0	1.5421	0.0015553	0.0056488	0.19165	563	3	1.5421	-2.80819
SEPTIN7	4	0.99011	0.99021	1	18510	0	1.5127	0.0015578	0.0056576	0.19165	564	4	1.5127	-2.80749
PAFAH1B1	4	0.97393	0.97407	1	18088	0	1.5855	0.0015602	0.0056654	0.19165	565	2	1.5855	-2.80682
HJURP	4	0.31247	0.45647	1	8439	2	0.36657	0.0015745	0.005712	0.192886	566	2	0.36657	-2.80286
PSMA3	4	0.47173	0.60584	1	11104	1	1.5331	0.0015798	0.0057343	0.193191	567	3	1.5331	-2.8014
INTS1	4	0.99842	0.99845	1	18849	0	1.3922	0.0015824	0.0057431	0.193191	568	4	1.3922	-2.80068
METTL17	4	0.98971	0.98979	1	18497	0	1.7398	0.0015849	0.0057514	0.193191	569	4	1.7398	-2.8
RPS8	4	0.99841	0.99845	1	18848	0	1.587	0.00159	0.0057664	0.193356	570	4	1.587	-2.7986
COA7	4	0.62755	0.68155	1	12474	1	1.3734	0.0015946	0.0057814	0.19352	571	3	1.3734	-2.79735
SLC39A9	4	0.16864	0.30906	1	5861	1	1.1975	0.001612	0.0058493	0.195449	572	3	1.1975	-2.79263
RAD51	4	0.67196	0.70763	1	12934	1	2.1058	0.0016169	0.0058695	0.195782	573	3	2.1058	-2.79132
ALAS1	4	0.85079	0.85089	1	15602	0	0.95272	0.0016262	0.0059031	0.196562	574	3	0.95272	-2.78883
SRSF7	4	0.43207	0.57907	1	10610	1	2.0264	0.0016401	0.0059498	0.19777	575	3	2.0264	-2.78513
SCGB2A1	4	0.97476	0.97492	1	18107	0	0.94399	0.0016426	0.0059622	0.197839	576	3	0.94399	-2.78447
PLK4	4	0.84223	0.84234	1	15434	0	0.95208	0.0016518	0.0060021	0.198593	577	3	0.95208	-2.78204
GLRX5	4	0.99707	0.99716	1	18764	0	1.3986	0.0016533	0.0060083	0.198593	578	4	1.3986	-2.78165
KRTCAP2	4	0.99834	0.99839	1	18846	0	0.83102	0.0016558	0.0060161	0.198593	579	4	0.83102	-2.78099
WDR11	4	0.99834	0.99839	1	18845	0	0.72796	0.0016628	0.0060342	0.198848	580	4	0.72796	-2.77916
PPP6R3	4	0.99833	0.99838	1	18844	0	0.99379	0.0016671	0.0060487	0.198983	581	4	0.99379	-2.77804
MRPL20	4	0.38666	0.5321	1	9806	1	1.7209	0.0016732	0.0060705	0.199355	582	3	1.7209	-2.77645
ORC3	4	0.89349	0.89348	1	16475	0	1.4267	0.0016908	0.0061373	0.201114	583	3	1.4267	-2.77191
CPSF1	4	0.99831	0.99836	1	18842	0	0.95349	0.0016932	0.0061451	0.201114	584	4	0.95349	-2.77129
ZFYVE16	4	0.22007	0.3617	1	6801	1	1.2092	0.0016958	0.006158	0.201137	585	3	1.2092	-2.77063
TUBD1	4	0.7727	0.77842	1	14215	1	1.3544	0.0016983	0.0061668	0.201137	586	3	1.3544	-2.76999
BCL2L1	4	0.97189	0.972	1	18045	0	1.7127	0.0017052	0.0061875	0.201469	587	3	1.7127	-2.76822
ALG2	4	0.83898	0.83911	1	15331	0	1.7576	0.0017101	0.0062088	0.201817	588	3	1.7576	-2.76698
TTI2	4	0.86266	0.86279	1	15847	0	0.83524	0.0017292	0.0062782	0.203727	589	2	0.83524	-2.76215
CDC45	4	0.58545	0.65893	1	12068	1	1.6289	0.0017433	0.0063269	0.20478	590	3	1.6289	-2.75863
SLC3A2	4	0.99711	0.9972	1	18769	0	1.5411	0.001745	0.0063321	0.20478	591	4	1.5411	-2.7582
API5	4	0.99822	0.99827	1	18839	0	0.60732	0.0017764	0.0064455	0.208096	592	4	0.60732	-2.75046
PIAS3	4	0.99822	0.99827	1	18838	0	0.9498	0.0017827	0.0064714	0.20858	593	4	0.9498	-2.74892
MRPL41	4	0.99633	0.99643	1	18723	0	1.5443	0.0017942	0.0065123	0.209546	594	4	1.5443	-2.74613
NUS1	4	0.79737	0.79932	1	14606	1	1.3945	0.0017996	0.0065268	0.20966	595	3	1.3945	-2.74482
PIKFYVE	4	0.99819	0.99824	1	18836	0	1.3522	0.0018111	0.0065714	0.209942	596	4	1.3522	-2.74206
SUGT1	4	0.99818	0.99823	1	18835	0	1.4619	0.0018167	0.0065921	0.209942	597	4	1.4619	-2.74072
ALG13	4	0.59504	0.66386	1	12153	1	1.5595	0.001818	0.0065947	0.209942	598	3	1.5595	-2.74041
CCNH	4	0.99781	0.99787	1	18812	0	1.6655	0.0018246	0.0066165	0.209942	599	4	1.6655	-2.73883
IFT74	4	0.99817	0.99822	1	18834	0	0.66777	0.001827	0.0066263	0.209942	600	4	0.66777	-2.73826
MFN2	4	0.99399	0.99407	1	18625	0	1.5237	0.0018272	0.0066268	0.209942	601	4	1.5237	-2.73821
MRPL4	4	0.98252	0.98262	1	18301	0	1.1028	0.0018302	0.006633	0.209942	602	4	1.1028	-2.7375
ALG9	4	0.90641	0.9064	1	16706	0	0.82298	0.0018319	0.0066382	0.209942	603	3	0.82298	-2.7371
N6AMT1	4	0.86747	0.86757	1	15932	0	1.5406	0.0018325	0.0066387	0.209942	604	3	1.5406	-2.73696
HNRNPUL2	4	0.99817	0.99822	1	18833	0	1.0652	0.0018348	0.0066455	0.209942	605	4	1.0652	-2.73641
PFDN2	4	0.99815	0.9982	1	18832	0	1.3823	0.0018453	0.0066838	0.210804	606	4	1.3823	-2.73393
ATP13A1	4	0.99815	0.9982	1	18831	0	1.0846	0.0018531	0.0067128	0.211246	607	4	1.0846	-2.7321
CRTC2	4	0.99814	0.9982	1	18830	0	1.0686	0.0018552	0.0067227	0.211246	608	4	1.0686	-2.73161
RPLP1	4	0.90656	0.90654	1	16708	0	1.7682	0.0018577	0.0067309	0.211246	609	3	1.7682	-2.73102
NOA1	4	0.99813	0.99818	1	18829	0	0.96523	0.0018691	0.0067693	0.211617	610	4	0.96523	-2.72837
SPCS2	4	0.97787	0.97802	1	18170	0	1.4106	0.0018702	0.0067739	0.211617	611	3	1.4106	-2.72811
CENPA	4	0.96334	0.96341	1	17857	0	1.7634	0.001871	0.006776	0.211617	612	3	1.7634	-2.72793
COQ2	4	0.99812	0.99817	1	18828	0	1.1566	0.0018819	0.0068066	0.212225	613	4	1.1566	-2.7254
LSM8	4	0.99636	0.99646	1	18726	0	2.0118	0.0018863	0.0068226	0.212379	614	4	2.0118	-2.72439
RARS2	4	0.24614	0.38833	1	7270	1	1.5904	0.0018992	0.006875	0.21366	615	3	1.5904	-2.72143
DDX55	4	0.9981	0.99815	1	18827	0	1.2558	0.0019049	0.0068962	0.213914	616	4	1.2558	-2.72013
MRE11A	4	0.74447	0.75672	1	13820	1	1.0608	0.0019073	0.0069055	0.213914	617	2	1.0608	-2.71958
CERS2	4	0.99807	0.99813	1	18825	0	1.2151	0.0019285	0.0069791	0.215339	618	4	1.2151	-2.71478
ECHDC1	4	0.99807	0.99813	1	18824	0	0.72294	0.0019295	0.0069806	0.215339	619	4	0.72294	-2.71456
RPLP2	4	0.97382	0.97396	1	18086	0	1.4989	0.0019316	0.0069853	0.215339	620	3	1.4989	-2.71408
TRIM37	4	0.99806	0.99812	1	18823	0	0.8761	0.0019352	0.0069982	0.21539	621	4	0.8761	-2.71327
SEC61B	4	0.98352	0.98365	1	18332	0	1.2694	0.001962	0.0070987	0.217877	622	4	1.2694	-2.7073
ELP2	4	0.91637	0.91632	1	16906	0	1.2826	0.0019629	0.0071018	0.217877	623	3	1.2826	-2.7071
NDUFA11	4	0.98584	0.98591	1	18389	0	1.2136	0.0019824	0.0071625	0.219385	624	4	1.2136	-2.70281
EXOSC10	4	0.93432	0.93426	1	17270	0	1.1747	0.0019871	0.0071796	0.219443	625	2	1.1747	-2.70178
RB1CC1	4	0.66169	0.70141	1	12818	1	1.2831	0.0019894	0.0071873	0.219443	626	3	1.2831	-2.70128
KLHL9	4	0.97953	0.97966	1	18226	0	1.1272	0.0020002	0.0072329	0.220483	627	3	1.1272	-2.69893
ANAPC5	4	0.75654	0.76574	1	13988	1	1.4782	0.0020083	0.0072687	0.220894	628	3	1.4782	-2.69717
MED15	4	0.99799	0.99804	1	18822	0	0.66775	0.0020097	0.0072718	0.220894	629	4	0.66775	-2.69687
RQCD1	4	0.93541	0.93536	1	17287	0	1.544	0.0020119	0.0072811	0.220894	630	3	1.544	-2.69639
EIF6	4	0.88018	0.88021	1	16206	0	1.7973	0.0020269	0.0073293	0.222003	631	3	1.7973	-2.69317
FAM25C	4	0.98938	0.98948	1	18482	0	1.4721	0.0020397	0.0073717	0.222772	632	4	1.4721	-2.69043
PSMD6	4	0.78186	0.786	1	14352	1	1.5307	0.0020416	0.007378	0.222772	633	3	1.5307	-2.69003
HIST2H3A	4	0.99793	0.99798	1	18821	0	1.1417	0.0020729	0.0074904	0.22581	634	4	1.1417	-2.68342
RPS13	4	0.83898	0.83911	1	15361	0	1.5143	0.0020808	0.0075163	0.226234	635	2	1.5143	-2.68177
GBF1	4	0.43516	0.58219	1	10661	1	1.3454	0.0021077	0.0076017	0.228447	636	3	1.3454	-2.67619
KIAA0196	4	0.99788	0.99794	1	18816	0	1.0474	0.0021228	0.0076592	0.229813	637	4	1.0474	-2.67309
COPS3	4	0.99786	0.99792	1	18815	0	1.1228	0.0021422	0.0077302	0.231579	638	4	1.1228	-2.66914
SUPT20H	4	0.99785	0.99791	1	18814	0	1.0062	0.00215	0.007759	0.232077	639	4	1.0062	-2.66756
EIF2S1	4	0.99784	0.99791	1	18813	0	1.4127	0.0021572	0.0077789	0.23231	640	4	1.4127	-2.66611
SDAD1	4	0.87219	0.87226	1	16034	0	1.6207	0.0021673	0.007811	0.232905	641	3	1.6207	-2.66408
POU3F2	4	0.99781	0.99787	1	18811	0	0.64334	0.0021894	0.0078924	0.234963	642	4	0.64334	-2.65967
C16orf59	4	0.33722	0.48158	1	8899	1	1.0932	0.0022006	0.0079214	0.23546	643	3	1.0932	-2.65746
BCS1L	4	0.99779	0.99785	1	18808	0	1.1123	0.002212	0.0079659	0.236281	644	4	1.1123	-2.65521
LAMTOR2	4	0.98743	0.98749	1	18424	0	1.1975	0.0022139	0.0079737	0.236281	645	4	1.1975	-2.65484
MRPS33	4	0.99777	0.99783	1	18807	0	0.78096	0.0022263	0.0080188	0.236791	646	4	0.78096	-2.65242
DHX37	4	0.99777	0.99783	1	18806	0	2.082	0.0022273	0.0080198	0.236791	647	4	2.082	-2.65222
CEP57	4	0.79152	0.79419	1	14507	1	1.1163	0.0022299	0.0080281	0.236791	648	3	1.1163	-2.65171
HYPK	4	0.91464	0.91457	1	16866	0	1.2569	0.002237	0.0080529	0.237158	649	3	1.2569	-2.65033
ELL	4	0.99776	0.99782	1	18805	0	1.3078	0.0022419	0.0080685	0.237251	650	4	1.3078	-2.64938
MCM7	4	0.99717	0.99726	1	18774	0	1.1434	0.0022531	0.0081104	0.237783	651	4	1.1434	-2.64722
RBM17	4	0.99775	0.9978	1	18804	0	0.67402	0.0022534	0.0081115	0.237783	652	4	0.67402	-2.64716
PRSS21	4	0.99774	0.9978	1	18803	0	0.57003	0.0022587	0.008126	0.237844	653	4	0.57003	-2.64614
TMX2	4	0.99774	0.99779	1	18802	0	1.01	0.0022635	0.00814	0.237889	654	4	1.01	-2.64522
HINFP	4	0.99314	0.99321	1	18598	0	1.4214	0.0022852	0.0082109	0.239488	655	4	1.4214	-2.64108
SLC25A31	4	0.50289	0.61946	1	11344	1	1.237	0.0022876	0.0082197	0.239488	656	3	1.237	-2.64062
CHRNB4	4	0.9977	0.99775	1	18801	0	0.52188	0.0022986	0.0082669	0.24028	657	4	0.52188	-2.63854
ZPR1	4	0.96602	0.96613	1	17918	0	1.2907	0.0023	0.0082721	0.24028	658	3	1.2907	-2.63827
NPIPA8	4	0.42377	0.57052	1	10470	1	1.1318	0.0023103	0.0083145	0.241147	659	2	1.1318	-2.63633
PPAT	4	0.80873	0.80963	1	14797	1	1.4618	0.0023174	0.0083389	0.241487	660	3	1.4618	-2.635
COX5B	4	0.99765	0.99771	1	18799	0	1.0219	0.002347	0.0084534	0.244406	661	4	1.0219	-2.62949
EMC7	4	0.93353	0.93349	1	17248	0	1.044	0.0023504	0.0084653	0.244406	662	3	1.044	-2.62886
METAP1	4	0.98021	0.98035	1	18240	0	1.1755	0.0023624	0.0085119	0.245382	663	3	1.1755	-2.62665
ETF1	4	0.9924	0.99247	1	18580	0	1.5942	0.0023765	0.0085658	0.246536	664	4	1.5942	-2.62406
HUS1	4	0.90693	0.9069	1	16717	0	1.2768	0.0023834	0.008585	0.246536	665	3	1.2768	-2.6228
CHERP	4	0.99762	0.99767	1	18797	0	1.4079	0.0023849	0.0085906	0.246536	666	4	1.4079	-2.62253
LIN9	4	0.94523	0.94528	1	17494	0	1.375	0.0023902	0.0086083	0.246671	667	3	1.375	-2.62157
POLR3K	4	0.95969	0.95975	1	17770	0	1.5732	0.0024045	0.0086549	0.24737	668	3	1.5732	-2.61898
PKMYT1	4	0.557	0.64473	1	11813	1	1.2909	0.0024081	0.0086676	0.24737	669	3	1.2909	-2.61833
POP5	4	0.99759	0.99765	1	18796	0	1.5008	0.0024107	0.0086766	0.24737	670	4	1.5008	-2.61786
SP2	4	0.91473	0.91467	1	16869	0	1.2892	0.0024135	0.0086844	0.24737	671	3	1.2892	-2.61735
DHX38	4	0.99492	0.995	1	18665	0	0.89821	0.0024197	0.0087036	0.247547	672	4	0.89821	-2.61624
ATF6B	4	0.99758	0.99763	1	18795	0	0.54467	0.0024247	0.0087274	0.247606	673	4	0.54467	-2.61534
RPP30	4	0.95084	0.95096	1	17593	0	1.4869	0.0024256	0.0087316	0.247606	674	3	1.4869	-2.61518
ANKRD17	4	0.04016	0.1022	0.925415	2103	1	1.2879	0.0024469	0.0088129	0.249542	675	3	1.2879	-2.61138
SEH1L	4	0.99694	0.99702	1	18754	0	1.5871	0.0024521	0.0088346	0.249788	676	4	1.5871	-2.61046
BOP1	4	0.36534	0.51022	1	9402	1	1.4156	0.0024591	0.0088523	0.249916	677	3	1.4156	-2.60922
PHAX	4	0.99434	0.99442	1	18643	0	1.6901	0.0024639	0.0088662	0.249942	678	4	1.6901	-2.60838
EXOSC2	4	0.99596	0.99607	1	18714	0	2.0513	0.0024698	0.0088813	0.249996	679	4	2.0513	-2.60734
SLC39A1	4	0.80651	0.80757	1	14758	1	1.132	0.0024795	0.0089123	0.250502	680	3	1.132	-2.60564
BUD31	4	0.99751	0.99758	1	18794	0	1.2363	0.0024866	0.0089346	0.25076	681	4	1.2363	-2.60439
MB21D2	4	0.99749	0.99756	1	18793	0	1.2052	0.0025053	0.0089952	0.252091	682	4	1.2052	-2.60114
PAK1IP1	4	0.99748	0.99754	1	18791	0	1.3513	0.0025241	0.0090543	0.253374	683	4	1.3513	-2.59789
SLC11A2	4	0.99744	0.99752	1	18790	0	0.75137	0.0025563	0.0091579	0.255899	684	4	0.75137	-2.59239
NOP2	4	0.99506	0.99516	1	18674	0	1.8385	0.0025709	0.0092004	0.25671	685	4	1.8385	-2.58991
RPL6	4	0.99542	0.99553	1	18683	0	1.6143	0.0025764	0.0092206	0.256899	686	4	1.6143	-2.58899
HSPA8	4	0.72324	0.7413	1	13536	1	1.3485	0.0025841	0.0092511	0.257102	687	3	1.3485	-2.58769
ADAT2	4	0.23568	0.37768	1	7078	1	0.97179	0.0025857	0.0092548	0.257102	688	2	0.97179	-2.58742
TAF6	4	0.99741	0.99748	1	18789	0	1.3097	0.0025944	0.0092858	0.257105	689	4	1.3097	-2.58596
PITPNB	4	0.99059	0.99068	1	18527	0	1.1749	0.0025974	0.0092957	0.257105	690	4	1.1749	-2.58546
GTPBP6	4	0.9974	0.99747	1	18788	0	0.92616	0.0026018	0.0093081	0.257105	691	4	0.92616	-2.58473
RBM39	4	0.60556	0.66943	1	12257	1	1.4926	0.0026074	0.0093314	0.257105	692	3	1.4926	-2.58379
DDX51	4	0.38084	0.52617	1	9690	1	1.2759	0.0026108	0.0093397	0.257105	693	2	1.2759	-2.58323
PGS1	4	0.98786	0.98791	1	18437	0	1.7792	0.0026139	0.0093485	0.257105	694	4	1.7792	-2.58271
TTK	4	0.99739	0.99746	1	18787	0	1.1567	0.002614	0.009349	0.257105	695	4	1.1567	-2.58269
DPH5	4	0.97165	0.97176	1	18038	0	1.2372	0.0026265	0.0093879	0.257803	696	3	1.2372	-2.58062
POLD3	4	0.99737	0.99744	1	18785	0	1.2196	0.0026311	0.0094034	0.257859	697	4	1.2196	-2.57986
AHCTF1	4	0.99734	0.99742	1	18784	0	1.0562	0.0026567	0.0094962	0.260029	698	4	1.0562	-2.57566
POLD1	4	0.99734	0.99742	1	18783	0	0.829	0.0026627	0.0095132	0.260116	699	4	0.829	-2.57468
RPS6	4	0.98154	0.98163	1	18274	0	1.3454	0.0026676	0.0095303	0.260116	700	4	1.3454	-2.57388
GOLGA8O	4	0.99733	0.99741	1	18782	0	1.2571	0.0026694	0.0095402	0.260116	701	4	1.2571	-2.57359
PSMB5	4	0.66504	0.70341	1	12859	1	1.3116	0.0027007	0.0096422	0.262109	702	3	1.3116	-2.56852
DHX36	4	0.35699	0.50174	1	9258	1	1.2713	0.0027047	0.0096521	0.262109	703	3	1.2713	-2.56788
KAT8	4	0.19354	0.33461	1	6296	1	1.3484	0.0027059	0.0096593	0.262109	704	2	1.3484	-2.56769
ELAC2	4	0.99729	0.99738	1	18780	0	1.1798	0.002709	0.0096681	0.262109	705	4	1.1798	-2.56719
NDUFA13	4	0.99727	0.99736	1	18779	0	0.75903	0.0027256	0.0097194	0.263127	706	4	0.75903	-2.56454
COX6B1	4	0.070938	0.16174	0.964292	3205	1	1.8139	0.0027508	0.0098018	0.264981	707	3	1.8139	-2.56054
SEC22B	4	0.76137	0.76942	1	14067	1	1.5456	0.0027637	0.0098469	0.265823	708	3	1.5456	-2.55851
FOXRED1	4	0.99712	0.99722	1	18772	0	1.1541	0.0027747	0.0098888	0.26658	709	4	1.1541	-2.55678
XYLT2	4	0.9972	0.99729	1	18778	0	1.3856	0.0027997	0.0099805	0.268378	710	4	1.3856	-2.55289
NADK2	4	0.9972	0.99729	1	18777	0	0.91806	0.0028003	0.0099836	0.268378	711	4	0.91806	-2.5528
GOLGA8H	4	0.83898	0.83911	1	15351	0	1.1796	0.0028131	0.010036	0.269139	712	3	1.1796	-2.55081
FMNL3	4	0.99719	0.99727	1	18775	0	1.0939	0.0028136	0.01004	0.269139	713	4	1.0939	-2.55074
QRSL1	4	0.86753	0.86762	1	15935	0	1.3297	0.0028324	0.010111	0.270648	714	3	1.3297	-2.54785
DPH7	4	0.99675	0.99684	1	18744	0	1.4997	0.002845	0.01016	0.2712	715	4	1.4997	-2.54592
ATXN7L3	4	0.36801	0.51293	1	9446	1	1.3455	0.0028483	0.010171	0.2712	716	3	1.3455	-2.54541
GANAB	4	0.99715	0.99724	1	18773	0	0.69305	0.0028497	0.010174	0.2712	717	4	0.69305	-2.5452
CSNK1A1	4	0.93201	0.93197	1	17223	0	1.4744	0.00286	0.010215	0.271926	718	3	1.4744	-2.54363
UQCRC2	4	0.053067	0.12744	0.939388	2584	1	0.9434	0.0028736	0.010271	0.27197	719	3	0.9434	-2.54157
AMBRA1	4	0.78899	0.79201	1	14468	1	1.2749	0.0028766	0.010278	0.27197	720	3	1.2749	-2.54112
MRPS7	4	0.97585	0.97601	1	18128	0	0.89048	0.0028819	0.010298	0.27197	721	3	0.89048	-2.54032
JUNB	4	0.99461	0.99468	1	18655	0	1.1771	0.0028831	0.0103	0.27197	722	4	1.1771	-2.54014
PEX5	4	0.99712	0.99721	1	18771	0	0.80264	0.0028833	0.010301	0.27197	723	4	0.80264	-2.54011
INTS4	4	0.99712	0.99721	1	18770	0	1.0038	0.0028843	0.010302	0.27197	724	4	1.0038	-2.53996
MRPS23	4	0.94737	0.94743	1	17529	0	1.5334	0.0028932	0.010326	0.272168	725	3	1.5334	-2.53862
WDR82	4	0.9971	0.99719	1	18768	0	0.9194	0.0028978	0.010339	0.272168	726	4	0.9194	-2.53793
DDX3X	4	0.74552	0.75747	1	13839	1	0.79819	0.0029009	0.010352	0.272168	727	2	0.79819	-2.53747
SKIV2L2	4	0.83898	0.83911	1	15345	0	1.5934	0.0029075	0.010374	0.27223	728	3	1.5934	-2.53648
NUDC	4	0.35506	0.49977	1	9222	1	0.38727	0.0029152	0.010396	0.27223	729	2	0.38727	-2.53533
TRMT13	4	0.99708	0.99718	1	18766	0	0.73651	0.0029159	0.010398	0.27223	730	4	0.73651	-2.53523
CTU1	4	0.99707	0.99717	1	18765	0	0.85471	0.0029263	0.010439	0.272941	731	4	0.85471	-2.53368
PRAMEF1	4	0.069862	0.15973	0.962729	3165	1	0.88945	0.002944	0.010502	0.274205	732	3	0.88945	-2.53106
ACACA	4	0.99704	0.99713	1	18762	0	0.80135	0.0029628	0.010572	0.275602	733	4	0.80135	-2.5283
INTS8	4	0.78561	0.78911	1	14414	1	1.3738	0.0029657	0.010584	0.275602	734	3	1.3738	-2.52787
SPDYE6	4	0.9676	0.96769	1	17958	0	1.4318	0.0029887	0.010655	0.277086	735	3	1.4318	-2.52452
SPDYE3	4	0.034186	0.090198	0.919616	1863	1	0.96545	0.0029997	0.010696	0.277557	736	3	0.96545	-2.52292
CFL1	4	0.093747	0.20377	0.976267	3987	1	0.96918	0.0030009	0.010703	0.277557	737	3	0.96918	-2.52275
MPHOSPH10	4	0.99379	0.99385	1	18615	0	1.5724	0.0030161	0.010754	0.278212	738	4	1.5724	-2.52055
URB1	4	0.99698	0.99707	1	18759	0	1.3509	0.0030167	0.010757	0.278212	739	4	1.3509	-2.52047
TARDBP	4	0.95744	0.95752	1	17722	0	1.5361	0.0030279	0.010801	0.278974	740	3	1.5361	-2.51886
PNISR	4	0.99696	0.99705	1	18757	0	1.0113	0.0030357	0.010824	0.279199	741	4	1.0113	-2.51774
VPS39	4	0.99696	0.99704	1	18756	0	0.81298	0.0030444	0.010858	0.27969	742	4	0.81298	-2.5165
NFS1	4	0.99694	0.99702	1	18755	0	1.0438	0.0030645	0.010927	0.280743	743	4	1.0438	-2.51364
ZER1	4	0.99693	0.99701	1	18753	0	1.1841	0.0030672	0.010939	0.280743	744	4	1.1841	-2.51326
HSD17B12	4	0.99404	0.99412	1	18629	0	1.3007	0.003069	0.010943	0.280743	745	4	1.3007	-2.513
PELO	4	0.99692	0.997	1	18752	0	1.2129	0.0030837	0.010997	0.281688	746	4	1.2129	-2.51093
ITGAV	4	0.032322	0.086302	0.919616	1781	1	1.2863	0.0030882	0.011009	0.281688	747	3	1.2863	-2.51029
EIF4B	4	0.95438	0.95445	1	17658	0	1.1023	0.0031093	0.011087	0.283275	748	3	1.1023	-2.50734
RPS27A	4	0.90242	0.90242	1	16623	0	1.0059	0.0031128	0.011101	0.283275	749	2	1.0059	-2.50685
LIPT2	4	0.94798	0.94804	1	17541	0	1.302	0.0031193	0.011124	0.283479	750	3	1.302	-2.50594
GATA2	4	0.99687	0.99696	1	18751	0	1.2529	0.0031255	0.011145	0.283642	751	4	1.2529	-2.50508
CCZ1	4	0.99686	0.99694	1	18750	0	0.70912	0.0031426	0.011199	0.284647	752	4	0.70912	-2.50271
PAPD7	4	0.95146	0.95159	1	17600	0	0.91551	0.0031493	0.011222	0.284847	753	3	0.91551	-2.50179
TIMM17A	4	0.99683	0.99692	1	18749	0	0.7374	0.0031656	0.011283	0.285968	754	4	0.7374	-2.49954
ZNF626	4	0.99638	0.99648	1	18729	0	1.5332	0.0031689	0.011296	0.285968	755	4	1.5332	-2.49909
OR4F17	4	0.99682	0.9969	1	18748	0	0.6422	0.0031825	0.011352	0.286966	756	4	0.6422	-2.49723
SAE1	4	0.99502	0.99511	1	18669	0	1.2636	0.0031897	0.011381	0.286966	757	4	1.2636	-2.49625
LAGE3	4	0.86356	0.86367	1	15866	0	1.3052	0.003192	0.011387	0.286966	758	3	1.3052	-2.49594
RPAP2	4	0.9968	0.99689	1	18747	0	1.4386	0.003195	0.011396	0.286966	759	4	1.4386	-2.49553
SMG7	4	0.69265	0.72065	1	13172	1	1.4086	0.003203	0.011427	0.287383	760	3	1.4086	-2.49444
GGPS1	4	0.99118	0.99125	1	18548	0	1.7137	0.0032244	0.011502	0.2885	761	4	1.7137	-2.49155
DDX18	4	0.95357	0.95365	1	17641	0	1.4853	0.0032244	0.011502	0.2885	762	3	1.4853	-2.49155
TOMM40	4	0.99234	0.99241	1	18578	0	1.3839	0.0032362	0.01154	0.288859	763	4	1.3839	-2.48996
COX11	4	0.47294	0.60636	1	11116	1	1.4518	0.0032381	0.011546	0.288859	764	3	1.4518	-2.48971
DGCR8	4	0.99675	0.99684	1	18746	0	1.0352	0.0032502	0.011591	0.289358	765	4	1.0352	-2.48809
RPS7	4	0.99675	0.99684	1	18745	0	0.9086	0.003252	0.011597	0.289358	766	4	0.9086	-2.48785
PRR14	4	0.99674	0.99683	1	18743	0	0.64572	0.003265	0.011643	0.29013	767	4	0.64572	-2.48612
HSP90B1	4	0.83898	0.83911	1	15370	0	1.1872	0.0032897	0.011726	0.291411	768	3	1.1872	-2.48284
UTP15	4	0.99671	0.9968	1	18742	0	1.4378	0.0032926	0.011738	0.291411	769	4	1.4378	-2.48246
LUC7L2	4	0.97852	0.97867	1	18191	0	0.96827	0.0032932	0.011744	0.291411	770	3	0.96827	-2.48238
CNOT3	4	0.91993	0.91994	1	16989	0	1.5107	0.0032967	0.011755	0.291411	771	3	1.5107	-2.48192
VCP	4	0.62218	0.6786	1	12430	1	1.6807	0.0033193	0.011834	0.292983	772	3	1.6807	-2.47895
DAP3	4	0.99401	0.99409	1	18627	0	1.3431	0.0033284	0.011866	0.293262	773	4	1.3431	-2.47776
EIF5	4	0.91451	0.91445	1	16863	0	1.3868	0.003332	0.011876	0.293262	774	3	1.3868	-2.4773
UBE2I	4	0.99088	0.99095	1	18537	0	1.4671	0.0033441	0.011921	0.293996	775	4	1.4671	-2.47572
NARS	4	0.99664	0.99675	1	18740	0	1.5384	0.0033577	0.011973	0.294577	776	4	1.5384	-2.47396
RHEB	4	0.32307	0.46716	1	8626	2	0.81365	0.0033585	0.011975	0.294577	777	2	0.81365	-2.47385
NOP10	4	0.63585	0.68628	1	12552	1	1.4478	0.0033638	0.011997	0.29472	778	3	1.4478	-2.47317
RRP1	4	0.77871	0.78341	1	14303	1	1.0682	0.0033834	0.012068	0.296021	779	2	1.0682	-2.47065
CRTC3	4	0.99661	0.99672	1	18739	0	0.94221	0.0033873	0.012081	0.296021	780	4	0.94221	-2.47015
EIF1AD	4	0.84246	0.84256	1	15441	0	1.8643	0.003403	0.012127	0.29658	781	3	1.8643	-2.46814
SF3B3	4	0.99659	0.9967	1	18738	0	1.0687	0.0034066	0.012134	0.29658	782	4	1.0687	-2.46768
MTG2	4	0.90868	0.90865	1	16749	0	1.2275	0.0034118	0.012152	0.296619	783	3	1.2275	-2.46702
RBM42	4	0.99658	0.99668	1	18737	0	0.82531	0.0034245	0.012202	0.297414	784	4	0.82531	-2.4654
EFTUD2	4	0.9473	0.94736	1	17528	0	0.65732	0.0034305	0.012225	0.297414	785	3	0.65732	-2.46464
DDX17	4	0.99657	0.99667	1	18736	0	0.93451	0.0034332	0.012231	0.297414	786	4	0.93451	-2.4643
EXT1	4	0.99656	0.99666	1	18735	0	1.0647	0.0034428	0.012263	0.297816	787	4	1.0647	-2.46309
DR1	4	0.93678	0.93674	1	17320	0	1.2319	0.0034543	0.012305	0.298456	788	3	1.2319	-2.46164
COX6C	4	0.98772	0.98777	1	18434	0	1.2666	0.0034604	0.012328	0.298626	789	4	1.2666	-2.46087
IFITM3	4	0.83199	0.83216	1	15222	0	1.2327	0.003469	0.012356	0.298626	790	3	1.2327	-2.4598
NOMO2	4	0.99653	0.99663	1	18734	0	0.87694	0.0034696	0.012359	0.298626	791	4	0.87694	-2.45972
KLF5	4	0.94963	0.9497	1	17573	0	1.133	0.003473	0.012375	0.298649	792	2	1.133	-2.4593
MRPS12	4	0.70607	0.72956	1	13338	1	1.0771	0.003479	0.0124	0.298871	793	3	1.0771	-2.45855
EIF2B5	4	0.9965	0.9966	1	18732	0	1.372	0.0034971	0.012463	0.299505	794	4	1.372	-2.45629
TAF10	4	0.71992	0.739	1	13497	1	1.3917	0.0034978	0.012467	0.299505	795	3	1.3917	-2.45621
OGDH	4	0.99649	0.99659	1	18731	0	0.88937	0.0035063	0.012496	0.299505	796	4	0.88937	-2.45515
NAA50	4	0.31268	0.45669	1	8445	1	1.4182	0.0035092	0.012505	0.299505	797	3	1.4182	-2.45479
MYBL2	4	0.6684	0.70543	1	12894	1	1.2327	0.0035093	0.012505	0.299505	798	3	1.2327	-2.45478
ATP5A1	4	0.93602	0.93596	1	17302	0	1.6958	0.0035174	0.012529	0.299697	799	3	1.6958	-2.45378
NPIPB3	4	0.98689	0.98696	1	18409	0	1.4464	0.0035221	0.012544	0.299697	800	4	1.4464	-2.4532
PYGM	4	0.99646	0.99656	1	18730	0	0.61398	0.0035426	0.012603	0.30053	801	4	0.61398	-2.45068
CTC1	4	0.93341	0.93336	1	17247	0	0.99934	0.0035465	0.012611	0.30053	802	3	0.99934	-2.4502
DDX59	4	0.99577	0.99587	1	18704	0	1.031	0.003575	0.012696	0.30219	803	4	1.031	-2.44672
PGD	4	0.94475	0.94479	1	17489	0	1.5926	0.0035846	0.012731	0.302639	804	3	1.5926	-2.44556
SPEF2	4	0.99638	0.99648	1	18728	0	0.58663	0.0036201	0.012858	0.305276	805	4	0.58663	-2.44128
C18orf21	4	0.95171	0.95184	1	17606	0	1.1296	0.0036306	0.012901	0.305917	806	3	1.1296	-2.44002
COX20	4	0.99636	0.99646	1	18725	0	1.0416	0.0036399	0.012931	0.30625	807	4	1.0416	-2.43891
ANXA11	4	0.8204	0.82064	1	15025	1	0.95735	0.0036506	0.01296	0.306569	808	3	0.95735	-2.43764
DLG5	4	0.94077	0.94075	1	17419	0	1.0428	0.0036741	0.013032	0.307879	809	3	1.0428	-2.43485
RPAP1	4	0.98557	0.98564	1	18381	0	1.4437	0.003688	0.01308	0.308636	810	4	1.4437	-2.43321
GSX2	4	0.43952	0.58673	1	10753	1	0.77359	0.0036936	0.0131	0.308731	811	3	0.77359	-2.43255
VWA9	4	0.97075	0.97086	1	18022	0	1.4733	0.0037094	0.01315	0.309534	812	3	1.4733	-2.4307
FAM180B	4	0.99049	0.99058	1	18522	0	0.97634	0.0037306	0.013227	0.310968	813	4	0.97634	-2.42822
MFNG	4	0.99625	0.99635	1	18720	0	0.57973	0.0037487	0.013289	0.312021	814	4	0.57973	-2.42612
TOMM22	4	0.97764	0.97779	1	18162	0	1.5307	0.0037877	0.013419	0.314363	815	3	1.5307	-2.42162
NUBP2	4	0.98053	0.98066	1	18251	0	1.0835	0.003788	0.013421	0.314363	816	3	1.0835	-2.42159
KNTC1	4	0.92288	0.92295	1	17042	0	0.93867	0.0037919	0.013438	0.314378	817	3	0.93867	-2.42114
HECTD1	4	0.85387	0.85396	1	15664	0	1.231	0.003799	0.013462	0.314538	818	3	1.231	-2.42033
PIGV	4	0.81481	0.8153	1	14926	1	0.95813	0.0038475	0.013627	0.31801	819	3	0.95813	-2.41482
EIF2B1	4	0.99555	0.99565	1	18695	0	1.4892	0.0038788	0.013729	0.320013	820	4	1.4892	-2.4113
MEIS1	4	0.9961	0.9962	1	18718	0	0.78544	0.0039012	0.013816	0.32165	821	4	0.78544	-2.4088
MAT2A	4	0.99608	0.99618	1	18717	0	0.97496	0.0039157	0.013863	0.322263	822	4	0.97496	-2.40719
FAM208A	4	0.24698	0.38916	1	7286	1	1.463	0.0039194	0.013877	0.322263	823	3	1.463	-2.40678
DDX56	4	0.93094	0.93085	1	17202	0	1.1579	0.0039368	0.013941	0.323374	824	3	1.1579	-2.40486
TUBA1B	4	0.95582	0.95586	1	17686	0	1.0108	0.0039572	0.014005	0.324458	825	3	1.0108	-2.40261
RPEL1	4	0.49365	0.61528	1	11272	1	1.5001	0.0039937	0.01413	0.326966	826	3	1.5001	-2.39862
HPS3	4	0.996	0.9961	1	18715	0	0.69352	0.0040042	0.014168	0.327433	827	4	0.69352	-2.39748
NDC80	4	0.94817	0.94823	1	17545	0	1.191	0.0040228	0.01423	0.328484	828	3	1.191	-2.39547
GRAP	4	0.0024512	0.0088315	0.806746	207	1	1.0405	0.0040289	0.014248	0.328494	829	3	1.0405	-2.39481
USP17L28	4	0.83379	0.83393	1	15251	0	1.4991	0.0040378	0.01427	0.328611	830	3	1.4991	-2.39386
CXXC4	4	0.99595	0.99606	1	18713	0	0.57701	0.0040504	0.014312	0.328785	831	4	0.57701	-2.3925
FURIN	4	0.99595	0.99606	1	18712	0	0.69809	0.0040504	0.014312	0.328785	832	4	0.69809	-2.3925
URI1	4	0.25761	0.40003	1	7485	1	1.1952	0.0040689	0.014365	0.329591	833	3	1.1952	-2.39052
MAD2L1BP	4	0.99593	0.99603	1	18711	0	1.0267	0.0040741	0.014384	0.329635	834	4	1.0267	-2.38997
RPS10	4	0.99588	0.99598	1	18709	0	1.6479	0.0041231	0.014543	0.332881	835	4	1.6479	-2.38478
UQCRFS1	4	0.99586	0.99596	1	18708	0	1.2815	0.0041416	0.014605	0.333647	836	4	1.2815	-2.38283
TTC27	4	0.76864	0.77516	1	14160	1	1.1439	0.0041434	0.014611	0.333647	837	3	1.1439	-2.38264
FOLR1	4	0.35662	0.50135	1	9249	1	1.1757	0.0041547	0.014648	0.334088	838	3	1.1757	-2.38146
GPR158	4	0.60643	0.66991	1	12267	1	1.0718	0.0041615	0.014672	0.334232	839	3	1.0718	-2.38075
C19orf43	4	0.89242	0.89242	1	16445	0	1.0861	0.0041962	0.014786	0.336427	840	3	1.0861	-2.37714
ZBTB48	4	0.99577	0.99587	1	18706	0	0.82122	0.0042279	0.014876	0.337815	841	4	0.82122	-2.37388
PSMG2	4	0.99577	0.99587	1	18705	0	0.81033	0.0042304	0.014882	0.337815	842	4	0.81033	-2.37362
RPL7L1	4	0.93542	0.93538	1	17288	0	1.0956	0.0042516	0.014955	0.338526	843	3	1.0956	-2.37145
CAP1	4	0.9559	0.95594	1	17688	0	1.2861	0.0042522	0.014958	0.338526	844	3	1.2861	-2.37139
GOLGA6L4	4	0.98566	0.98574	1	18383	0	1.2645	0.0042547	0.014966	0.338526	845	4	1.2645	-2.37113
RPS5	4	0.30913	0.453	1	8388	1	1.5511	0.0042661	0.015001	0.338898	846	3	1.5511	-2.36997
POLDIP3	4	0.99572	0.99582	1	18703	0	0.48444	0.004279	0.015047	0.339538	847	4	0.48444	-2.36866
ZNF511	4	0.99571	0.99582	1	18702	0	1.2046	0.004289	0.015085	0.340002	848	4	1.2046	-2.36764
NSMCE2	4	0.94983	0.94989	1	17575	0	1.3227	0.004306	0.015137	0.340768	849	3	1.3227	-2.36593
MDM4	4	0.14475	0.28445	0.992768	5478	2	0.31877	0.0043161	0.015165	0.340996	850	2	0.31877	-2.36491
CCT7	4	0.76172	0.7697	1	14072	1	1.4213	0.0043369	0.015237	0.342224	851	3	1.4213	-2.36282
ANKHD1	4	0.99565	0.99575	1	18700	0	0.62656	0.0043495	0.01528	0.342775	852	4	0.62656	-2.36156
CHD8	4	0.92425	0.92425	1	17074	0	1.5733	0.0043643	0.015329	0.343155	853	3	1.5733	-2.36009
CEP85	4	0.52452	0.62929	1	11524	1	0.99652	0.0043733	0.015357	0.343155	854	3	0.99652	-2.35919
CKAP5	4	0.39416	0.5398	1	9944	2	0.0018533	0.0043832	0.015387	0.343155	855	2	0.0018533	-2.35821
DDX49	4	0.27866	0.42173	1	7846	1	0.4505	0.0043832	0.015387	0.343155	856	2	0.4505	-2.35821
ISG20L2	4	0.52152	0.6279	1	11505	1	0.77848	0.0043832	0.015387	0.343155	857	3	0.77848	-2.35821
PLA2G12B	4	0.93088	0.93079	1	17201	0	1.1659	0.0044154	0.015483	0.344432	858	3	1.1659	-2.35503
TLK2	4	0.69866	0.72463	1	13243	1	1.0681	0.0044208	0.015498	0.344432	859	3	1.0681	-2.3545
TTC1	4	0.71661	0.73665	1	13464	1	1.5302	0.0044287	0.015526	0.344432	860	3	1.5302	-2.35372
EMC3	4	0.99557	0.99566	1	18699	0	0.90072	0.0044341	0.015545	0.344432	861	4	0.90072	-2.35319
ANKRD24	4	0.99556	0.99566	1	18698	0	0.4532	0.0044358	0.015551	0.344432	862	4	0.4532	-2.35303
DENR	4	0.99556	0.99566	1	18697	0	0.76343	0.0044376	0.015555	0.344432	863	4	0.76343	-2.35285
POLR2K	4	0.7761	0.78122	1	14260	1	1.4145	0.0044411	0.01557	0.344432	864	3	1.4145	-2.35251
CHMP1A	4	0.99555	0.99565	1	18696	0	0.7464	0.0044465	0.01559	0.344469	865	4	0.7464	-2.35198
DNAJC8	4	0.16233	0.30256	1	5755	1	1.0567	0.0044711	0.015673	0.34589	866	3	1.0567	-2.34959
RNF5	4	0.99552	0.99562	1	18692	0	0.66679	0.0044795	0.015699	0.34589	867	4	0.66679	-2.34877
TFB1M	4	0.30455	0.44834	1	8308	2	0.87704	0.0044818	0.015708	0.34589	868	2	0.87704	-2.34855
CDK9	4	0.97867	0.97883	1	18195	0	1.5537	0.0044981	0.015774	0.346236	869	3	1.5537	-2.34697
PNO1	4	0.99045	0.99054	1	18520	0	1.6378	0.0045019	0.015787	0.346236	870	4	1.6378	-2.3466
PUS1	4	0.9955	0.9956	1	18691	0	0.59269	0.0045019	0.015787	0.346236	871	4	0.59269	-2.3466
PPA2	4	0.99548	0.99558	1	18690	0	0.98398	0.0045154	0.015835	0.346236	872	4	0.98398	-2.3453
USP21	4	0.99548	0.99558	1	18689	0	0.46002	0.0045239	0.015863	0.346236	873	4	0.46002	-2.34449
PFDN6	4	0.69533	0.72243	1	13204	1	1.28	0.0045288	0.015882	0.346236	874	2	1.28	-2.34402
INO80	4	0.78404	0.78782	1	14389	1	1.6309	0.0045288	0.015882	0.346236	875	3	1.6309	-2.34402
SYT7	4	0.87189	0.87194	1	16026	0	1.4679	0.0045304	0.015888	0.346236	876	3	1.4679	-2.34386
PTPN11	4	0.73706	0.7512	1	13718	1	0.74005	0.004535	0.0159	0.346236	877	2	0.74005	-2.34342
RPS6KB1	4	0.99546	0.99557	1	18688	0	0.56177	0.0045361	0.015905	0.346236	878	4	0.56177	-2.34332
PDE2A	4	0.99545	0.99556	1	18686	0	0.88619	0.0045461	0.015937	0.34636	879	4	0.88619	-2.34236
TRAF6	4	0.99545	0.99556	1	18685	0	0.96127	0.0045488	0.015947	0.34636	880	4	0.96127	-2.3421
NDUFC2-KCTD14	4	0.14712	0.28689	0.99391	5519	1	1.3636	0.0045599	0.015987	0.346832	881	3	1.3636	-2.34104
TUBGCP3	4	0.98751	0.98757	1	18428	0	1.3801	0.0045719	0.016029	0.347349	882	4	1.3801	-2.3399
MRPS18B	4	0.99541	0.99552	1	18682	0	0.9804	0.0045851	0.016079	0.348032	883	4	0.9804	-2.33865
NCAPG2	4	0.97523	0.97537	1	18119	0	1.2641	0.0045983	0.016127	0.348621	884	3	1.2641	-2.3374
VPS16	4	0.98633	0.98641	1	18397	0	1.1271	0.0046023	0.016142	0.348621	885	4	1.1271	-2.33703
ANKRD49	4	0.97581	0.97597	1	18126	0	1.1329	0.0046132	0.016181	0.348829	886	3	1.1329	-2.336
LAS1L	4	0.66394	0.70275	1	12844	1	0.61009	0.0046149	0.016189	0.348829	887	2	0.61009	-2.33584
PAQR6	4	0.98505	0.98515	1	18367	0	1.0386	0.0046305	0.016232	0.349361	888	4	1.0386	-2.33437
METTL14	4	0.98604	0.98612	1	18393	0	0.93234	0.0046505	0.016293	0.350282	889	4	0.93234	-2.3325
ANAPC11	4	0.99533	0.99544	1	18680	0	1.0184	0.004668	0.01635	0.351112	890	4	1.0184	-2.33087
RPL31	4	0.9795	0.97963	1	18224	0	1.6412	0.0046831	0.016402	0.351735	891	3	1.6412	-2.32947
ZNHIT1	4	0.99345	0.99354	1	18604	0	1.025	0.0046871	0.016415	0.351735	892	4	1.025	-2.3291
METTL2B	4	0.98052	0.98065	1	18250	0	1.2464	0.0047002	0.016457	0.352239	893	3	1.2464	-2.32788
LIN52	4	0.74889	0.75996	1	13881	1	1.3811	0.0047046	0.016476	0.352244	894	2	1.3811	-2.32748
ATXN10	4	0.96772	0.96781	1	17962	0	1.107	0.0047171	0.016519	0.352768	895	3	1.107	-2.32632
COX15	4	0.47886	0.6089	1	11161	1	1.5008	0.0047339	0.016584	0.353767	896	3	1.5008	-2.32478
THOC3	4	0.9858	0.98587	1	18387	0	1.1603	0.0047548	0.01665	0.354688	897	4	1.1603	-2.32287
OR56A3	4	0.99524	0.99535	1	18679	0	0.42365	0.0047595	0.016665	0.354688	898	4	0.42365	-2.32244
PRELID1	4	0.82191	0.8221	1	15050	1	0.69136	0.0047693	0.016701	0.355064	899	2	0.69136	-2.32155
SNAPC2	4	0.99522	0.99533	1	18678	0	0.4268	0.0047792	0.016737	0.35544	900	4	0.4268	-2.32064
EEFSEC	4	0.34037	0.48482	1	8956	1	1.2036	0.0048011	0.016792	0.35621	901	3	1.2036	-2.31866
YLPM1	4	0.6203	0.67755	1	12410	1	0.54042	0.0048095	0.016819	0.356397	902	2	0.54042	-2.3179
CRIPT	4	0.74449	0.75673	1	13821	1	1.4073	0.0048222	0.016859	0.356452	903	3	1.4073	-2.31675
TM7SF2	4	0.67621	0.71024	1	12978	1	1.5712	0.0048224	0.016859	0.356452	904	3	1.5712	-2.31674
TMPRSS11A	4	0.99513	0.99523	1	18676	0	0.51201	0.0048662	0.017004	0.359111	905	4	0.51201	-2.31281
LOC730183	4	0.77115	0.77716	1	14195	1	1.245	0.0049015	0.017121	0.361195	906	3	1.245	-2.30967
MRPL16	4	0.26083	0.40335	1	7549	1	1.0364	0.0049113	0.017146	0.36131	907	2	1.0364	-2.3088
EXOSC4	4	0.75412	0.76389	1	13956	1	0.87032	0.0049237	0.017187	0.36143	908	3	0.87032	-2.30771
HAX1	4	0.99508	0.99517	1	18675	0	0.37229	0.004925	0.017189	0.36143	909	4	0.37229	-2.30759
PEF1	4	0.99505	0.99514	1	18673	0	0.5158	0.0049476	0.017266	0.362455	910	4	0.5158	-2.30561
MATR3	4	0.99505	0.99513	1	18672	0	1.1852	0.0049538	0.017287	0.362455	911	4	1.1852	-2.30506
SLX1B	4	0.99504	0.99513	1	18671	0	0.73384	0.0049558	0.017295	0.362455	912	4	0.73384	-2.30489
RSL24D1	4	0.98258	0.98268	1	18305	0	1.2425	0.0049818	0.017377	0.363396	913	4	1.2425	-2.30261
MRPS26	4	0.98367	0.98378	1	18336	0	0.88595	0.0049822	0.017378	0.363396	914	4	0.88595	-2.30258
RRP12	4	0.99494	0.99503	1	18667	0	1.3012	0.0050564	0.017621	0.368084	915	4	1.3012	-2.29616
MED18	4	0.81644	0.81681	1	14956	1	0.43997	0.005078	0.017702	0.369311	916	3	0.43997	-2.29431
DDX27	4	0.66648	0.70429	1	12875	1	1.2424	0.0050831	0.017719	0.369311	917	3	1.2424	-2.29387
CEP170	4	0.99489	0.99497	1	18664	0	0.77626	0.005105	0.017786	0.370311	918	4	0.77626	-2.292
LIAS	4	0.99485	0.99492	1	18663	0	1.0967	0.0051481	0.017931	0.372925	919	4	1.0967	-2.28835
VPS25	4	0.99039	0.99049	1	18518	0	1.2894	0.005181	0.018053	0.374652	920	4	1.2894	-2.28559
DBR1	4	0.93849	0.93846	1	17372	0	1.4131	0.005181	0.018053	0.374652	921	3	1.4131	-2.28559
ITGB5	4	0.98535	0.98543	1	18374	0	0.92877	0.0051998	0.018116	0.375213	922	4	0.92877	-2.28401
UBR4	4	0.9948	0.99488	1	18662	0	1.0073	0.0052014	0.01812	0.375213	923	4	1.0073	-2.28388
YAE1D1	4	0.99479	0.99487	1	18661	0	0.89973	0.0052094	0.018144	0.375311	924	4	0.89973	-2.28321
COPB1	4	0.99475	0.99483	1	18660	0	1.1745	0.0052481	0.018275	0.377602	925	4	1.1745	-2.28
CLDN10	4	0.99471	0.99479	1	18658	0	0.45798	0.0052864	0.018403	0.379836	926	4	0.45798	-2.27684
DOT1L	4	0.99471	0.99478	1	18657	0	0.61513	0.005294	0.018428	0.379955	927	4	0.61513	-2.27622
B4GALT7	4	0.98871	0.98877	1	18464	0	1.1912	0.0053196	0.018502	0.381065	928	4	1.1912	-2.27412
GOSR2	4	0.96762	0.96771	1	17960	0	0.90547	0.0053391	0.018571	0.382073	929	3	0.90547	-2.27253
RPL32	4	0.42633	0.57311	1	10516	1	1.7698	0.0053551	0.018617	0.382609	930	3	1.7698	-2.27123
POLR2G	4	0.99462	0.99469	1	18656	0	0.80044	0.0053777	0.018695	0.383804	931	4	0.80044	-2.2694
TRMT61A	4	0.6165	0.67543	1	12365	1	0.79782	0.0053952	0.018747	0.384287	932	2	0.79782	-2.26799
RRNAD1	4	0.9946	0.99467	1	18654	0	0.44453	0.0053992	0.018759	0.384287	933	4	0.44453	-2.26767
RPL27	4	0.99459	0.99466	1	18653	0	1.1589	0.0054095	0.018795	0.384607	934	4	1.1589	-2.26684
CSTF3	4	0.99395	0.99403	1	18623	0	1.3521	0.0054219	0.018837	0.385064	935	4	1.3521	-2.26585
TMEM120B	4	0.99456	0.99464	1	18652	0	0.63515	0.0054353	0.018884	0.385479	936	4	0.63515	-2.26478
BTG4	4	0.99456	0.99463	1	18651	0	0.60694	0.0054431	0.018912	0.385479	937	4	0.60694	-2.26415
POM121C	4	0.99455	0.99463	1	18650	0	0.63243	0.0054452	0.018918	0.385479	938	4	0.63243	-2.26399
RFT1	4	0.66784	0.70508	1	12889	1	0.85027	0.0054639	0.018985	0.38564	939	2	0.85027	-2.2625
GCM1	4	0.35436	0.49902	1	9202	2	-0.22154	0.0054639	0.018985	0.38564	940	1	-0.22154	-2.2625
MRPL48	4	0.94987	0.94994	1	17576	0	1.2246	0.0054712	0.019006	0.38564	941	3	1.2246	-2.26192
ATIC	4	0.8981	0.8981	1	16548	0	1.5103	0.0054745	0.019018	0.38564	942	3	1.5103	-2.26166
SUGP2	4	0.99452	0.9946	1	18649	0	1.0043	0.0054804	0.019041	0.38564	943	4	1.0043	-2.26119
NOB1	4	0.93992	0.9399	1	17403	0	1.0774	0.0054817	0.019047	0.38564	944	3	1.0774	-2.26108
MRPL13	4	0.30332	0.44709	1	8286	1	0.92274	0.0054892	0.019071	0.385725	945	3	0.92274	-2.26049
WDR43	4	0.99446	0.99454	1	18648	0	0.98023	0.0055368	0.019226	0.387289	946	4	0.98023	-2.25674
C2orf27A	4	0.092959	0.20231	0.97511	3961	2	-0.36147	0.0055411	0.019235	0.387289	947	1	-0.36147	-2.2564
FAM168A	4	0.84811	0.84821	1	15552	0	1.0133	0.0055421	0.019238	0.387289	948	3	1.0133	-2.25633
ZNHIT6	4	0.91771	0.91769	1	16938	0	0.9548	0.00555	0.019264	0.387289	949	2	0.9548	-2.25571
PTBP1	4	0.12537	0.25939	0.986175	5007	1	0.86253	0.00555	0.019264	0.387289	950	2	0.86253	-2.25571
MECR	4	0.99445	0.99452	1	18647	0	0.59918	0.0055526	0.01927	0.387289	951	4	0.59918	-2.2555
PSMA4	4	0.552	0.64228	1	11760	1	1.3603	0.0055817	0.019359	0.388648	952	2	1.3603	-2.25323
RECQL4	4	0.99441	0.99449	1	18646	0	0.54303	0.0055863	0.019378	0.388648	953	4	0.54303	-2.25288
NAPA	4	0.9944	0.99448	1	18645	0	1.4251	0.0055968	0.019413	0.388925	954	4	1.4251	-2.25206
CD34	4	0.25048	0.39276	1	7357	1	0.93069	0.0056331	0.019548	0.391032	955	3	0.93069	-2.24925
NDUFB4	4	0.8853	0.88533	1	16317	0	1.0723	0.005643	0.019572	0.391032	956	3	1.0723	-2.24849
EFCAB6	4	0.90774	0.9077	1	16732	0	0.92244	0.0056441	0.019579	0.391032	957	3	0.92244	-2.24841
HDAC3	4	0.88811	0.88814	1	16365	0	1.0637	0.0056521	0.019607	0.391177	958	3	1.0637	-2.24779
ANAPC13	4	0.84814	0.84823	1	15553	0	1.051	0.00569	0.01975	0.393619	959	3	1.051	-2.24489
CXCL1	4	0.65619	0.69814	1	12762	1	0.90212	0.0057019	0.019792	0.393809	960	3	0.90212	-2.24398
NAA25	4	0.61187	0.67286	1	12325	1	1.6607	0.0057046	0.019801	0.393809	961	3	1.6607	-2.24377
SF1	4	0.99429	0.99437	1	18641	0	0.91879	0.0057129	0.019824	0.393863	962	4	0.91879	-2.24314
MAP3K11	4	0.99427	0.99435	1	18640	0	0.59819	0.0057344	0.019894	0.39474	963	4	0.59819	-2.24151
MVK	4	0.84214	0.84225	1	15431	0	1.3591	0.005739	0.019909	0.39474	964	3	1.3591	-2.24116
ITPK1	4	0.9883	0.98834	1	18453	0	0.7793	0.0057509	0.019941	0.394846	965	4	0.7793	-2.24026
GH2	4	0.99424	0.99433	1	18639	0	0.79175	0.0057555	0.019956	0.394846	966	4	0.79175	-2.23992
SRSF10	4	0.98603	0.98611	1	18392	0	1.065	0.0057751	0.020024	0.395523	967	4	1.065	-2.23844
HIST1H2AK	4	0.99422	0.99431	1	18638	0	0.63051	0.0057776	0.020032	0.395523	968	4	0.63051	-2.23825
FBXW11	4	0.99418	0.99427	1	18637	0	0.95028	0.005821	0.020177	0.397976	969	4	0.95028	-2.235
PCYT1A	4	0.59508	0.66389	1	12154	1	1.3588	0.0058347	0.020226	0.398535	970	3	1.3588	-2.23398
MAP1LC3A	4	0.99401	0.99409	1	18628	0	1.1574	0.0058441	0.020258	0.398747	971	4	1.1574	-2.23328
CENPU	4	0.99414	0.99423	1	18634	0	0.77972	0.0058581	0.020309	0.399355	972	4	0.77972	-2.23224
AMIGO2	4	0.87986	0.87989	1	16200	0	1.1648	0.0058775	0.020373	0.400196	973	3	1.1648	-2.23081
SNUPN	4	0.9941	0.99419	1	18633	0	1.0045	0.005896	0.020433	0.400858	974	4	1.0045	-2.22944
GEMIN8	4	0.9941	0.99419	1	18632	0	0.76281	0.005902	0.020449	0.400858	975	4	0.76281	-2.229
PHB2	4	0.99004	0.99014	1	18507	0	1.3734	0.0059137	0.020491	0.401269	976	4	1.3734	-2.22814
CWC15	4	0.91162	0.91158	1	16799	0	1.3348	0.0059194	0.020519	0.401406	977	3	1.3348	-2.22772
MAP2K1	4	0.99407	0.99415	1	18631	0	0.59512	0.0059279	0.02055	0.401613	978	4	0.59512	-2.2271
SH2D5	4	0.99406	0.99414	1	18630	0	0.59362	0.0059384	0.02058	0.401789	979	4	0.59362	-2.22633
ST13	4	0.99145	0.99152	1	18555	0	0.81112	0.0059515	0.020622	0.401877	980	4	0.81112	-2.22537
MTHFD1	4	0.73193	0.74753	1	13659	1	1.0131	0.0059553	0.020632	0.401877	981	3	1.0131	-2.2251
SASS6	4	0.97411	0.97424	1	18094	0	0.94384	0.0059629	0.020652	0.401877	982	3	0.94384	-2.22454
PET117	4	0.73825	0.75209	1	13734	1	0.93333	0.0059731	0.020684	0.401877	983	2	0.93333	-2.2238
LIN54	4	0.79222	0.79479	1	14520	1	1.0819	0.0059838	0.02072	0.401877	984	3	1.0819	-2.22302
TWSG1	4	0.7835	0.78737	1	14377	1	0.80036	0.0059895	0.020738	0.401877	985	2	0.80036	-2.22261
TAF1D	4	0.23416	0.37611	1	7051	1	0.82633	0.0059941	0.020755	0.401877	986	2	0.82633	-2.22228
HNRNPH1	4	0.99026	0.99036	1	18514	0	1.2129	0.0059988	0.020772	0.401877	987	4	1.2129	-2.22194
ITSN2	4	0.994	0.99409	1	18626	0	0.63712	0.0059994	0.020774	0.401877	988	4	0.63712	-2.22189
ADAMTS7	4	0.68384	0.71508	1	13056	1	1.1568	0.0060152	0.020823	0.402355	989	3	1.1568	-2.22075
MRPS21	4	0.98497	0.98508	1	18365	0	0.98753	0.0060209	0.020841	0.402355	990	4	0.98753	-2.22034
GOLGA6L1	4	0.97616	0.9763	1	18133	0	1.1568	0.0060295	0.020868	0.402469	991	3	1.1568	-2.21972
FOS	4	0.76103	0.76916	1	14058	1	0.86677	0.0060364	0.020896	0.402536	992	2	0.86677	-2.21922
TUBGCP5	4	0.16819	0.30859	1	5854	1	0.95008	0.0060429	0.020913	0.402536	993	3	0.95008	-2.21875
HIST2H3C	4	0.99394	0.99402	1	18622	0	1.3066	0.0060586	0.020967	0.403167	994	4	1.3066	-2.21763
NAA15	4	0.99393	0.99401	1	18621	0	0.73499	0.0060676	0.020999	0.403368	995	4	0.73499	-2.21698
NUP35	4	0.26416	0.40679	1	7606	2	-0.017931	0.006081	0.02105	0.403947	996	2	-0.017931	-2.21602
CLMP	4	0.99389	0.99396	1	18620	0	0.87238	0.0061149	0.021153	0.405509	997	4	0.87238	-2.21361
TADA2B	4	0.98954	0.98963	1	18492	0	1.2686	0.0061275	0.021187	0.4057	998	4	1.2686	-2.21272
ASCC3	4	0.080675	0.18001	0.97262	3523	1	1.0995	0.0061333	0.021211	0.4057	999	3	1.0995	-2.21231
TRIM44	4	0.20465	0.34593	1	6500	1	1.1323	0.0061497	0.021256	0.4057	1000	3	1.1323	-2.21115
RNF8	4	0.96924	0.96932	1	17987	0	0.90785	0.0061633	0.021293	0.4057	1001	3	0.90785	-2.21019
RAB4B	4	0.99383	0.99391	1	18619	0	0.51658	0.0061653	0.021299	0.4057	1002	4	0.51658	-2.21005
C20orf62	4	0.99383	0.9939	1	18618	0	0.63226	0.0061727	0.021324	0.4057	1003	4	0.63226	-2.20952
SRRD	4	0.98948	0.98957	1	18489	0	0.9218	0.0061759	0.021335	0.4057	1004	4	0.9218	-2.2093
UXS1	4	0.99382	0.99389	1	18617	0	0.85011	0.0061807	0.021348	0.4057	1005	4	0.85011	-2.20896
KARS	4	0.98816	0.98819	1	18449	0	1.3204	0.0062021	0.021404	0.4057	1006	4	1.3204	-2.20746
RRAGA	4	0.72561	0.74298	1	13568	1	0.94913	0.0062031	0.021407	0.4057	1007	3	0.94913	-2.20739
TTPAL	4	0.9938	0.99387	1	18616	0	1.042	0.0062046	0.021411	0.4057	1008	4	1.042	-2.20729
ZFP36L1	4	0.9895	0.98959	1	18490	0	1.1421	0.006207	0.021417	0.4057	1009	4	1.1421	-2.20712
RPS15A	4	0.96579	0.96591	1	17912	0	1.418	0.0062212	0.021464	0.406083	1010	3	1.418	-2.20613
CYP1A1	4	0.72619	0.74341	1	13574	1	1.2169	0.0062274	0.02148	0.406083	1011	3	1.2169	-2.20569
PRPF8	4	0.86796	0.86804	1	15944	0	1.6029	0.0062474	0.021533	0.406689	1012	2	1.6029	-2.2043
FUBP1	4	0.99373	0.99381	1	18614	0	0.67498	0.0062711	0.021606	0.407656	1013	4	0.67498	-2.20266
COL8A2	4	0.9937	0.99378	1	18613	0	0.56563	0.0062965	0.021693	0.408289	1014	4	0.56563	-2.2009
BANF1	4	0.55578	0.64415	1	11800	1	1.1519	0.0062977	0.021701	0.408289	1015	3	1.1519	-2.20082
SSBP1	4	0.9937	0.99378	1	18612	0	0.78251	0.0062999	0.021709	0.408289	1016	4	0.78251	-2.20067
IKZF3	4	0.99369	0.99377	1	18611	0	0.73295	0.006308	0.021731	0.408289	1017	4	0.73295	-2.20011
CINP	4	0.9597	0.95976	1	17772	0	0.66548	0.0063124	0.021746	0.408289	1018	3	0.66548	-2.19981
OR4F21	4	0.83898	0.83911	1	15340	0	1.2017	0.0063284	0.021799	0.40887	1019	3	1.2017	-2.19871
HSPBAP1	4	0.99366	0.99374	1	18610	0	0.6912	0.0063393	0.021839	0.409226	1020	4	0.6912	-2.19796
PRKDC	4	0.96692	0.96701	1	17945	0	1.3385	0.0063521	0.02188	0.409592	1021	3	1.3385	-2.19708
RALY	4	0.99364	0.99372	1	18609	0	0.76232	0.0063602	0.021903	0.409627	1022	4	0.76232	-2.19653
RPS28	4	0.99361	0.99369	1	18607	0	1.0382	0.0063882	0.021998	0.410524	1023	4	1.0382	-2.19462
RFC3	4	0.99361	0.99369	1	18606	0	1.4767	0.0063923	0.02201	0.410524	1024	4	1.4767	-2.19434
LSM3	4	0.81059	0.81136	1	14844	1	1.3666	0.006394	0.022016	0.410524	1025	3	1.3666	-2.19423
BRIX1	4	0.69303	0.72089	1	13174	1	1.0698	0.0064116	0.022077	0.410761	1026	3	1.0698	-2.19303
HDAC8	4	0.90414	0.90412	1	16660	0	1.1686	0.0064134	0.022084	0.410761	1027	3	1.1686	-2.19291
NDUFB8	4	0.86786	0.86795	1	15941	0	1.1733	0.0064166	0.022093	0.410761	1028	3	1.1733	-2.1927
CCNT1	4	0.31159	0.45554	1	8425	1	1.231	0.0064434	0.022184	0.411992	1029	3	1.231	-2.19088
DDX20	4	0.4686	0.60443	1	11082	1	1.68	0.0064497	0.022202	0.411992	1030	3	1.68	-2.19046
RPL3	4	0.87503	0.87507	1	16085	0	0.046517	0.0064666	0.022253	0.412533	1031	1	0.046517	-2.18932
SMARCD1	4	0.29119	0.43458	1	8079	1	0.76777	0.0064954	0.022347	0.41387	1032	3	0.76777	-2.18739
CNOT4	4	0.99349	0.99358	1	18605	0	0.93384	0.0065092	0.022388	0.414227	1033	4	0.93384	-2.18647
TSC2	4	0.13755	0.27705	0.99013	5348	1	0.674	0.0065203	0.02243	0.414611	1034	2	0.674	-2.18573
MBD3	4	0.76833	0.77492	1	14154	1	1.022	0.0065398	0.022496	0.415425	1035	3	1.022	-2.18444
FKBPL	4	0.73927	0.75282	1	13745	1	0.80144	0.0065557	0.022549	0.415742	1036	3	0.80144	-2.18338
DHX9	4	0.6338	0.68508	1	12532	1	1.2558	0.0065694	0.022593	0.415742	1037	3	1.2558	-2.18247
ANHX	4	0.85459	0.85469	1	15685	0	0.90976	0.0065699	0.022594	0.415742	1038	3	0.90976	-2.18244
PTGES3	4	0.99342	0.99351	1	18603	0	0.72686	0.0065782	0.02262	0.415742	1039	4	0.72686	-2.18189
RPL7A	4	0.51662	0.62566	1	11459	1	1.2412	0.006579	0.022622	0.415742	1040	3	1.2412	-2.18184
ANAPC15	4	0.8756	0.87565	1	16104	0	1.1409	0.0066256	0.022777	0.418196	1041	3	1.1409	-2.17877
BANP	4	0.83898	0.83911	1	15366	0	1.8246	0.0066662	0.022899	0.420027	1042	3	1.8246	-2.17612
THBS3	4	0.98832	0.98836	1	18454	0	0.99078	0.0066897	0.022975	0.42101	1043	4	0.99078	-2.17459
MAD2L2	4	0.62439	0.67981	1	12445	1	1.3991	0.0067813	0.023282	0.42496	1044	3	1.3991	-2.16869
MYB	4	0.99322	0.99329	1	18601	0	0.37251	0.0067821	0.023284	0.42496	1045	4	0.37251	-2.16864
GTPBP10	4	0.92272	0.92278	1	17040	0	1.3061	0.0067862	0.023298	0.42496	1046	3	1.3061	-2.16837
RIOK2	4	0.99321	0.99328	1	18600	0	0.90409	0.0067864	0.023298	0.42496	1047	4	0.90409	-2.16836
WDR7	4	0.53292	0.63318	1	11590	1	0.98199	0.0067913	0.023311	0.42496	1048	3	0.98199	-2.16805
TRAPPC3	4	0.65466	0.69723	1	12740	1	0.7152	0.0068062	0.023355	0.42496	1049	2	0.7152	-2.1671
FARSB	4	0.41573	0.56219	1	10325	1	0.95757	0.0068089	0.023365	0.42496	1050	3	0.95757	-2.16692
LAMTOR4	4	0.25014	0.39243	1	7353	1	0.86413	0.0068233	0.023414	0.42496	1051	3	0.86413	-2.16601
TRUB2	4	0.98853	0.98858	1	18457	0	1.2212	0.0068286	0.023429	0.42496	1052	4	1.2212	-2.16567
POLR1A	4	0.96221	0.9623	1	17838	0	1.663	0.0068286	0.023429	0.42496	1053	3	1.663	-2.16567
NDUFA1	4	0.89087	0.89089	1	16416	0	1.2686	0.0068337	0.023447	0.42496	1054	3	1.2686	-2.16534
RPS4X	4	0.48789	0.61277	1	11225	1	1.5855	0.0068409	0.02347	0.42496	1055	3	1.5855	-2.16489
PARP9	4	0.99316	0.99322	1	18599	0	0.49049	0.0068434	0.023479	0.42496	1056	4	0.49049	-2.16473
PYURF	4	0.92057	0.92058	1	17002	0	1.0877	0.0068561	0.023533	0.425522	1057	3	1.0877	-2.16392
MRPS10	4	0.93949	0.93948	1	17395	0	1.0308	0.0068661	0.023562	0.425654	1058	3	1.0308	-2.16329
CCDC9	4	0.99162	0.99169	1	18560	0	1.0837	0.0068991	0.023682	0.426931	1059	4	1.0837	-2.16121
CRISP2	4	0.85307	0.85315	1	15645	0	0.95321	0.0068991	0.023682	0.426931	1060	3	0.95321	-2.16121
TCP1	4	0.94825	0.94831	1	17547	0	1.2554	0.0069035	0.0237	0.426931	1061	3	1.2554	-2.16093
UBE2H	4	0.97932	0.97946	1	18218	0	1.0263	0.0069106	0.023722	0.426931	1062	3	1.0263	-2.16048
CCNG1	4	0.99307	0.99313	1	18597	0	0.73382	0.0069317	0.023794	0.42758	1063	4	0.73382	-2.15916
KEAP1	4	0.97834	0.97849	1	18182	0	0.70568	0.0069356	0.023803	0.42758	1064	3	0.70568	-2.15892
NCL	4	0.95303	0.95314	1	17630	0	1.274	0.0069664	0.023897	0.428862	1065	3	1.274	-2.15699
TMEM116	4	0.99301	0.99308	1	18596	0	0.71569	0.0069908	0.023983	0.43001	1066	4	0.71569	-2.15547
PPP4C	4	0.98979	0.98986	1	18498	0	1.2842	0.0070548	0.024203	0.433138	1067	4	1.2842	-2.15152
MCM2	4	0.99294	0.99302	1	18595	0	0.66648	0.0070572	0.02421	0.433138	1068	4	0.66648	-2.15137
ACAT1	4	0.21159	0.35301	1	6637	1	0.71871	0.0070618	0.024226	0.433138	1069	3	0.71871	-2.15108
SEC62	4	0.81164	0.81232	1	14864	1	0.52646	0.0070833	0.024306	0.434168	1070	3	0.52646	-2.14976
MPC2	4	0.99291	0.99299	1	18594	0	0.70678	0.0070938	0.024347	0.434502	1071	4	0.70678	-2.14912
RPL13A	4	0.90862	0.90859	1	16748	0	1.1137	0.0071056	0.024383	0.434734	1072	2	1.1137	-2.1484
ATP6V1H	4	0.98174	0.98184	1	18279	0	1.099	0.0071285	0.024452	0.435399	1073	4	1.099	-2.147
MRPL33	4	0.09375	0.20377	0.976267	3988	2	0.72849	0.0071347	0.024466	0.435399	1074	2	0.72849	-2.14662
NAA20	4	0.99284	0.99292	1	18593	0	1.1709	0.0071577	0.024547	0.435657	1075	4	1.1709	-2.14523
UQCRQ	4	0.92692	0.92689	1	17122	0	1.2606	0.0071638	0.02457	0.435657	1076	3	1.2606	-2.14486
PSMG1	4	0.99283	0.99291	1	18591	0	1.105	0.0071717	0.024593	0.435657	1077	4	1.105	-2.14438
TRAF2	4	0.99283	0.99291	1	18592	0	0.76377	0.0071717	0.024593	0.435657	1078	4	0.76377	-2.14438
NBPF9	4	0.86416	0.86425	1	15882	0	1.0464	0.0071724	0.024594	0.435657	1079	3	1.0464	-2.14434
TRMT6	4	0.99279	0.99287	1	18590	0	1.0423	0.0072081	0.024706	0.437233	1080	4	1.0423	-2.14218
CENPK	4	0.99278	0.99286	1	18589	0	1.1206	0.0072157	0.024729	0.437233	1081	4	1.1206	-2.14172
RBBP4	4	0.91433	0.91427	1	16860	0	0.93833	0.0072313	0.02478	0.437734	1082	3	0.93833	-2.14078
OR4F4	4	0.78756	0.79079	1	14448	1	0.87276	0.0072922	0.024985	0.440745	1083	2	0.87276	-2.13714
CCRN4L	4	0.9927	0.99279	1	18588	0	0.38703	0.007296	0.024997	0.440745	1084	4	0.38703	-2.13692
NDUFS1	4	0.97715	0.97728	1	18152	0	1.0029	0.0073467	0.025151	0.442844	1085	3	1.0029	-2.13391
DDX54	4	0.99166	0.99173	1	18561	0	1.2903	0.0073541	0.025176	0.442844	1086	4	1.2903	-2.13347
RPS14	4	0.95206	0.95219	1	17614	0	1.1199	0.0073576	0.025186	0.442844	1087	3	1.1199	-2.13326
COPE	4	0.35264	0.49729	1	9170	1	1.5387	0.0073739	0.025244	0.443465	1088	3	1.5387	-2.1323
KCNIP1	4	0.2404	0.38241	1	7160	1	0.29376	0.0073915	0.025296	0.443669	1089	2	0.29376	-2.13127
GNAS	4	0.96208	0.96217	1	17837	0	0.8009	0.0073924	0.025302	0.443669	1090	3	0.8009	-2.13121
TUT1	4	0.93533	0.93529	1	17286	0	1.3292	0.0074065	0.025351	0.444124	1091	3	1.3292	-2.13039
DMAP1	4	0.99251	0.99259	1	18586	0	0.98594	0.0074854	0.025626	0.448523	1092	4	0.98594	-2.12578
LRRIQ3	4	0.99249	0.99257	1	18585	0	0.61641	0.0075071	0.025693	0.44929	1093	4	0.61641	-2.12453
FPGS	4	0.99248	0.99256	1	18584	0	0.83578	0.0075183	0.025735	0.449338	1094	4	0.83578	-2.12388
HEY2	4	0.99248	0.99255	1	18583	0	0.801	0.0075216	0.025743	0.449338	1095	4	0.801	-2.12369
INTS7	4	0.99247	0.99255	1	18582	0	0.91406	0.0075309	0.025768	0.44937	1096	4	0.91406	-2.12315
URB2	4	0.9223	0.92234	1	17028	0	0.6435	0.0075456	0.02581	0.449683	1097	2	0.6435	-2.12231
NDUFS2	4	0.96163	0.96172	1	17822	0	1.2908	0.007569	0.025887	0.450342	1098	3	1.2908	-2.12096
WDR12	4	0.97109	0.9712	1	18028	0	1.1751	0.0075778	0.02592	0.450342	1099	3	1.1751	-2.12046
SSRP1	4	0.91581	0.91577	1	16888	0	0.99852	0.0075823	0.025931	0.450342	1100	3	0.99852	-2.1202
POLE2	4	0.99091	0.99098	1	18540	0	1.2974	0.0075857	0.025942	0.450342	1101	4	1.2974	-2.12
KIF5A	4	0.95738	0.95745	1	17720	0	1.1318	0.0076211	0.026055	0.451901	1102	3	1.1318	-2.11798
TUBB4B	4	0.95507	0.95514	1	17672	0	1.609	0.0076483	0.026145	0.453044	1103	3	1.609	-2.11644
CTPS1	4	0.4367	0.58374	1	10693	2	0.7911	0.0077755	0.026536	0.459396	1104	2	0.7911	-2.10927
SHQ1	4	0.22075	0.36239	1	6817	2	-0.14145	0.0078537	0.0268	0.463238	1105	1	-0.14145	-2.10493
BMP8A	4	0.99215	0.9922	1	18577	0	0.57243	0.0078549	0.026806	0.463238	1106	4	0.57243	-2.10486
NOP14	4	0.95816	0.95822	1	17738	0	1.4832	0.0078686	0.026849	0.463448	1107	3	1.4832	-2.1041
ACTR3	4	0.7844	0.78812	1	14393	1	0.98189	0.007874	0.026867	0.463448	1108	3	0.98189	-2.1038
CD248	4	0.9921	0.99216	1	18576	0	0.37413	0.0079027	0.026958	0.464255	1109	4	0.37413	-2.10222
CMTR1	4	0.99209	0.99216	1	18575	0	1.5192	0.0079116	0.026986	0.464255	1110	4	1.5192	-2.10174
ABT1	4	0.99209	0.99216	1	18574	0	1.014	0.0079116	0.026986	0.464255	1111	4	1.014	-2.10174
TRIM28	4	0.99208	0.99215	1	18573	0	0.79134	0.0079219	0.027016	0.464345	1112	4	0.79134	-2.10117
PSMD14	4	0.70704	0.73023	1	13354	1	1.167	0.0079564	0.027118	0.46568	1113	3	1.167	-2.09928
SLC22A8	4	0.99203	0.99211	1	18571	0	0.50132	0.0079658	0.027146	0.465742	1114	4	0.50132	-2.09877
H3F3A	4	0.21269	0.35414	1	6656	1	0.3924	0.0080334	0.027345	0.468734	1115	2	0.3924	-2.0951
CDC5L	4	0.99079	0.99086	1	18532	0	1.5048	0.0080437	0.027374	0.468811	1116	4	1.5048	-2.09454
NCAPD2	4	0.95895	0.95901	1	17760	0	0.94429	0.0080633	0.027437	0.469473	1117	3	0.94429	-2.09349
CWC22	4	0.99192	0.992	1	18570	0	1.0406	0.0080766	0.027486	0.469678	1118	4	1.0406	-2.09277
GTPBP1	4	0.99192	0.99199	1	18569	0	0.47494	0.0080808	0.027498	0.469678	1119	4	0.47494	-2.09255
TUBB	4	0.83898	0.83911	1	15342	0	0.81879	0.0080888	0.027524	0.469709	1120	2	0.81879	-2.09212
STT3B	4	0.95537	0.95541	1	17676	0	0.98564	0.0081429	0.027701	0.471987	1121	3	0.98564	-2.08922
PPME1	4	0.92809	0.92805	1	17141	0	0.98629	0.0081464	0.027707	0.471987	1122	3	0.98629	-2.08903
C16orf62	4	0.99183	0.9919	1	18567	0	0.83645	0.0081667	0.027781	0.472819	1123	4	0.83645	-2.08795
RGP1	4	0.72651	0.74365	1	13580	1	1.0204	0.0081847	0.027843	0.473455	1124	3	1.0204	-2.087
CHEK1	4	0.99001	0.99011	1	18506	0	1.1405	0.0082299	0.028005	0.475789	1125	4	1.1405	-2.08461
CHCHD5	4	0.99172	0.99179	1	18565	0	0.67541	0.0082831	0.028167	0.477949	1126	4	0.67541	-2.08181
RPS24	4	0.69225	0.72042	1	13167	1	1.4724	0.0082872	0.028182	0.477949	1127	3	1.4724	-2.08159
RASA4	4	0.78491	0.78851	1	14403	1	0.75567	0.0083273	0.028315	0.479366	1128	3	0.75567	-2.0795
ELL3	4	0.99167	0.99174	1	18563	0	0.95072	0.00833	0.028323	0.479366	1129	4	0.95072	-2.07935
SLC22A17	4	0.99166	0.99173	1	18562	0	0.80969	0.0083386	0.028353	0.479366	1130	4	0.80969	-2.07891
HIST1H2BL	4	0.74238	0.7551	1	13784	1	1.2363	0.0083461	0.028366	0.479366	1131	3	1.2363	-2.07852
SOD1	4	0.98754	0.9876	1	18430	0	1.4601	0.0083671	0.028437	0.480132	1132	4	1.4601	-2.07743
PAXBP1	4	0.95698	0.95705	1	17709	0	1.1251	0.0083941	0.028528	0.481006	1133	3	1.1251	-2.07603
RPS6KA4	4	0.9916	0.99167	1	18559	0	0.94743	0.0083964	0.028539	0.481006	1134	4	0.94743	-2.07591
GOLGA6D	4	0.67652	0.71043	1	12982	1	0.95804	0.0084691	0.028771	0.484499	1135	3	0.95804	-2.07216
SMG8	4	0.99151	0.99158	1	18558	0	0.60481	0.0084892	0.028831	0.485083	1136	4	0.60481	-2.07113
BCL3	4	0.9915	0.99156	1	18557	0	0.42707	0.0085001	0.028868	0.485144	1137	4	0.42707	-2.07058
SRSF6	4	0.99149	0.99156	1	18556	0	1.1434	0.0085051	0.028886	0.485144	1138	4	1.1434	-2.07032
ISCA1	4	0.36611	0.511	1	9418	1	1.5887	0.0085349	0.028977	0.485853	1139	3	1.5887	-2.0688
EPAS1	4	0.85632	0.85646	1	15723	0	0.78017	0.0085358	0.028981	0.485853	1140	3	0.78017	-2.06876
ATP5O	4	0.90383	0.90381	1	16656	0	1.2682	0.0085654	0.029074	0.485853	1141	3	1.2682	-2.06725
LYPLA2	4	0.99143	0.9915	1	18554	0	0.4707	0.008566	0.029077	0.485853	1142	4	0.4707	-2.06722
MARK2	4	0.83446	0.83459	1	15268	0	0.94308	0.0085669	0.029082	0.485853	1143	3	0.94308	-2.06718
ATP8B2	4	0.99143	0.9915	1	18553	0	0.82545	0.0085697	0.029095	0.485853	1144	4	0.82545	-2.06703
ZNF37A	4	0.11174	0.23582	0.986175	4553	3	-0.42895	0.0085724	0.029106	0.485853	1145	1	-0.42895	-2.0669
NDUFA4	4	0.81555	0.816	1	14941	1	0.95499	0.0086099	0.029216	0.487261	1146	3	0.95499	-2.065
BAZ1B	4	0.25237	0.39466	1	7389	1	0.97457	0.0086184	0.029244	0.487311	1147	3	0.97457	-2.06457
NDUFV1	4	0.98694	0.98702	1	18410	0	1.0427	0.0086433	0.029327	0.488266	1148	4	1.0427	-2.06332
HIST1H2AC	4	0.52125	0.62777	1	11504	1	0.77281	0.0086545	0.029358	0.488358	1149	3	0.77281	-2.06276
LEMD2	4	0.99082	0.99091	1	18534	0	0.74	0.0086726	0.029411	0.488714	1150	4	0.74	-2.06185
CDH10	4	0.99132	0.99139	1	18552	0	0.72611	0.0086793	0.029431	0.488714	1151	4	0.72611	-2.06152
DYNLRB1	4	0.9913	0.99137	1	18551	0	0.89892	0.0087014	0.029497	0.488988	1152	4	0.89892	-2.06041
LY6G5B	4	0.99129	0.99136	1	18550	0	0.46024	0.008708	0.029517	0.488988	1153	4	0.46024	-2.06008
MCM3	4	0.95835	0.95842	1	17744	0	1.5526	0.0087104	0.029524	0.488988	1154	3	1.5526	-2.05996
USP42	4	0.36603	0.51093	1	9416	2	-0.023906	0.008752	0.029659	0.490202	1155	1	-0.023906	-2.05789
TBP	4	0.10554	0.22486	0.983139	4361	2	0.022231	0.008752	0.029659	0.490202	1156	2	0.022231	-2.05789
BMF	4	0.99124	0.99131	1	18549	0	0.39765	0.0087582	0.029674	0.490202	1157	4	0.39765	-2.05759
ATP5J2-PTCD1	4	0.99035	0.99044	1	18517	0	1.0039	0.0087877	0.029775	0.491446	1158	4	1.0039	-2.05612
HIST1H2AI	4	0.98904	0.98913	1	18472	0	1.2372	0.0088157	0.029862	0.491748	1159	4	1.2372	-2.05474
GAGE12I	4	0.64371	0.69082	1	12625	1	1.1584	0.008817	0.029868	0.491748	1160	3	1.1584	-2.05468
GAGE2D	4	0.99118	0.99125	1	18547	0	0.5552	0.0088219	0.029886	0.491748	1161	4	0.5552	-2.05444
SEC13	4	0.99118	0.99125	1	18546	0	0.85129	0.0088242	0.029896	0.491748	1162	4	0.85129	-2.05432
MVD	4	0.89569	0.89572	1	16513	0	1.0445	0.0088523	0.029982	0.492379	1163	3	1.0445	-2.05294
RPL12	4	0.99115	0.99122	1	18544	0	1.345	0.0088547	0.029988	0.492379	1164	4	1.345	-2.05283
EIF3CL	4	0.99114	0.99121	1	18543	0	0.78703	0.0088644	0.030025	0.492379	1165	4	0.78703	-2.05235
KTI12	4	0.8958	0.89581	1	16516	0	1.2583	0.0088694	0.030038	0.492379	1166	3	1.2583	-2.05211
LRRC24	4	0.9911	0.99118	1	18542	0	0.38943	0.008901	0.030132	0.493501	1167	4	0.38943	-2.05056
EXOSC7	4	0.20404	0.34534	1	6489	1	0.85915	0.0089209	0.030195	0.494104	1168	3	0.85915	-2.04959
CTNNBL1	4	0.94883	0.9489	1	17560	0	1.1658	0.0089307	0.030226	0.494198	1169	3	1.1658	-2.04911
ASNA1	4	0.92976	0.92964	1	17174	0	0.77639	0.0089406	0.030253	0.494207	1170	3	0.77639	-2.04863
MRPL35	4	0.7868	0.79015	1	14431	1	0.88833	0.0089572	0.030302	0.494589	1171	3	0.88833	-2.04783
KRTAP5-6	4	0.065914	0.15221	0.959683	3029	2	0.33451	0.0090492	0.030604	0.498063	1172	2	0.33451	-2.04339
NDUFS8	4	0.97129	0.9714	1	18033	0	1.0045	0.0090504	0.030608	0.498063	1173	3	1.0045	-2.04333
THUMPD1	4	0.99094	0.99102	1	18541	0	0.66044	0.0090562	0.03063	0.498063	1174	4	0.66044	-2.04305
STT3A	4	0.72508	0.74261	1	13560	1	0.85124	0.0090666	0.030665	0.498063	1175	3	0.85124	-2.04256
ATP5B	4	0.99089	0.99097	1	18539	0	1.1311	0.0090715	0.030682	0.498063	1176	4	1.1311	-2.04232
NOL7	4	0.25426	0.39664	1	7421	1	1.1151	0.0090765	0.030694	0.498063	1177	3	1.1151	-2.04208
TRMT5	4	0.91028	0.91023	1	16773	0	0.86749	0.0090778	0.030697	0.498063	1178	3	0.86749	-2.04202
PARG	4	0.7289	0.7454	1	13618	1	0.96825	0.0091063	0.030783	0.498905	1179	3	0.96825	-2.04066
KPNB1	4	0.99089	0.99097	1	18538	0	1.6483	0.0091124	0.030801	0.498905	1180	4	1.6483	-2.04037
OR4A47	4	0.91746	0.91743	1	16929	0	0.87254	0.0091662	0.030974	0.499833	1181	3	0.87254	-2.03781
EGR1	4	0.99083	0.99092	1	18536	0	0.49121	0.0091666	0.030977	0.499833	1182	4	0.49121	-2.03779
USP17L26	4	0.94249	0.94249	1	17452	0	0.92846	0.0091693	0.030982	0.499833	1183	3	0.92846	-2.03766
CFAP47	4	0.99083	0.99091	1	18535	0	0.43041	0.009172	0.030991	0.499833	1184	4	0.43041	-2.03754
GAPDH	4	0.83898	0.83911	1	15348	0	1.1758	0.0091762	0.031003	0.499833	1185	3	1.1758	-2.03734
DRAP1	4	0.91581	0.91577	1	16889	0	0.77827	0.0091808	0.031017	0.499833	1186	2	0.77827	-2.03712
REST	4	0.97598	0.97613	1	18131	0	0.88111	0.0091975	0.031074	0.499833	1187	3	0.88111	-2.03633
COX7C	4	0.97907	0.97921	1	18205	0	1.1608	0.0092012	0.03109	0.499833	1188	3	1.1608	-2.03616
HEATR1	4	0.9908	0.99088	1	18533	0	0.6332	0.0092026	0.031094	0.499833	1189	4	0.6332	-2.03609
STS	4	0.92996	0.92986	1	17184	0	0.63267	0.0092338	0.031193	0.501003	1190	3	0.63267	-2.03462
TRO	4	0.99074	0.99082	1	18531	0	0.42674	0.0092642	0.031288	0.501757	1191	4	0.42674	-2.03319
LSM2	4	0.9313	0.93125	1	17210	0	0.94021	0.009265	0.031293	0.501757	1192	3	0.94021	-2.03315
MAD1L1	4	0.33418	0.47853	1	8854	1	0.72181	0.0093016	0.031397	0.503013	1193	2	0.72181	-2.03144
PHF7	4	0.01395	0.045718	0.883786	988	1	0.85339	0.0093207	0.031452	0.503462	1194	3	0.85339	-2.03055
OIP5	4	0.95396	0.95404	1	17647	0	0.43952	0.009342	0.031526	0.504234	1195	2	0.43952	-2.02956
CFLAR	4	0.99065	0.99073	1	18530	0	0.88849	0.0093539	0.031566	0.504441	1196	4	0.88849	-2.02901
CHMP7	4	0.67829	0.71157	1	13001	1	1.1272	0.0093826	0.03166	0.504478	1197	3	1.1272	-2.02768
SLC35D1	4	0.86978	0.86982	1	15971	0	0.7492	0.0093954	0.031699	0.504478	1198	3	0.7492	-2.02708
FGD1	4	0.9906	0.99069	1	18529	0	0.65858	0.0093991	0.031712	0.504478	1199	4	0.65858	-2.02691
RPL18A	4	0.9906	0.99068	1	18528	0	1.0506	0.0094022	0.03172	0.504478	1200	4	1.0506	-2.02677
GRWD1	4	0.99058	0.99067	1	18526	0	0.59113	0.0094162	0.031767	0.504478	1201	4	0.59113	-2.02612
A2ML1	4	0.92463	0.9246	1	17082	0	0.89222	0.0094183	0.031773	0.504478	1202	3	0.89222	-2.02603
IMP4	4	0.97916	0.9793	1	18211	0	0.31698	0.0094189	0.031774	0.504478	1203	3	0.31698	-2.026
ABCG1	4	0.99057	0.99066	1	18525	0	0.477	0.0094287	0.031804	0.504478	1204	4	0.477	-2.02555
CHAF1B	4	0.97006	0.97018	1	18005	0	1.095	0.009429	0.031805	0.504478	1205	3	1.095	-2.02553
MRPS31	4	0.76748	0.77421	1	14145	1	1.0326	0.0094872	0.031997	0.506602	1206	3	1.0326	-2.02286
FAM25G	4	0.99051	0.9906	1	18523	0	0.93935	0.0094883	0.032	0.506602	1207	4	0.93935	-2.02281
RFWD2	4	0.81364	0.81419	1	14900	1	0.8041	0.009493	0.032019	0.506602	1208	2	0.8041	-2.0226
IMMT	4	0.68517	0.7159	1	13080	1	0.87397	0.0095178	0.032101	0.507426	1209	3	0.87397	-2.02146
GNB1L	4	0.99047	0.99056	1	18521	0	0.78106	0.0095268	0.032124	0.507426	1210	4	0.78106	-2.02105
FECH	4	0.90112	0.90113	1	16596	0	0.81735	0.0095357	0.032151	0.50744	1211	3	0.81735	-2.02065
KCNN3	4	0.05391	0.12913	0.939388	2624	1	0.88207	0.0095626	0.032239	0.508402	1212	3	0.88207	-2.01942
MCMBP	4	0.97875	0.9789	1	18196	0	1.0863	0.0095729	0.03227	0.508464	1213	3	1.0863	-2.01896
NUDT9	4	0.88854	0.88856	1	16372	0	0.95305	0.009587	0.032312	0.508613	1214	3	0.95305	-2.01832
MLN	4	0.9904	0.9905	1	18519	0	0.5296	0.0095955	0.032332	0.508613	1215	4	0.5296	-2.01793
AGAP4	4	0.83091	0.83105	1	15198	0	1.3373	0.0096141	0.032383	0.509001	1216	3	1.3373	-2.01709
ILF3	4	0.98475	0.98485	1	18358	0	1.125	0.0096217	0.032412	0.50903	1217	4	1.125	-2.01675
HIST1H2AJ	4	0.88287	0.88293	1	16262	0	0.94719	0.0096721	0.032584	0.511319	1218	3	0.94719	-2.01448
C2orf91	4	0.88372	0.88379	1	16281	0	0.77038	0.0096825	0.032613	0.511347	1219	3	0.77038	-2.01401
CABP4	4	0.9903	0.9904	1	18515	0	0.53683	0.0096965	0.032648	0.511479	1220	4	0.53683	-2.01338
LMO1	4	0.99014	0.99024	1	18512	0	0.34558	0.0098595	0.033152	0.518591	1221	4	0.34558	-2.00615
PWP1	4	0.85404	0.85415	1	15670	0	1.0261	0.0098606	0.033156	0.518591	1222	3	1.0261	-2.0061
UGT2A3	4	0.99012	0.99021	1	18511	0	0.7023	0.0098845	0.033235	0.519389	1223	4	0.7023	-2.00505
NPIPB9	4	0.99006	0.99016	1	18509	0	0.99386	0.0099356	0.033391	0.521158	1224	4	0.99386	-2.00281
SMNDC1	4	0.98253	0.98264	1	18302	0	1.1023	0.0099514	0.033435	0.521158	1225	4	1.1023	-2.00212
JMJD6	4	0.99005	0.99015	1	18508	0	0.65981	0.0099544	0.033445	0.521158	1226	4	0.65981	-2.00198
ERCC3	4	0.69225	0.72042	1	13168	1	0.73022	0.0099573	0.033457	0.521158	1227	2	0.73022	-2.00186
RILP	4	0.89434	0.89433	1	16493	0	0.8723	0.010006	0.033612	0.523008	1228	3	0.8723	-1.99974
ZNHIT2	4	0.46923	0.60473	1	11088	1	1.4304	0.010012	0.03363	0.523008	1229	3	1.4304	-1.99948
PSME3	4	0.98997	0.99006	1	18505	0	0.67084	0.010026	0.03367	0.523116	1230	4	0.67084	-1.99887
TTI1	4	0.98913	0.98922	1	18475	0	1.0773	0.010035	0.033692	0.523116	1231	4	1.0773	-1.99848
DPM1	4	0.98032	0.98046	1	18241	0	0.84696	0.010044	0.033724	0.523189	1232	3	0.84696	-1.99809
GDI2	4	0.98993	0.99002	1	18504	0	0.54403	0.01007	0.033796	0.523505	1233	4	0.54403	-1.99697
RPA1	4	0.98993	0.99002	1	18503	0	0.55204	0.010071	0.033799	0.523505	1234	4	0.55204	-1.99693
NUFIP1	4	0.98991	0.98999	1	18502	0	0.57546	0.010093	0.033865	0.523844	1235	4	0.57546	-1.99598
STOML2	4	0.98989	0.98998	1	18501	0	0.59331	0.010106	0.033897	0.523844	1236	4	0.59331	-1.99542
HECTD2	4	0.80996	0.8108	1	14828	1	0.6968	0.010108	0.033903	0.523844	1237	2	0.6968	-1.99533
KRTAP10-4	4	0.98988	0.98996	1	18500	0	0.66299	0.010124	0.033954	0.524205	1238	4	0.66299	-1.99465
KRTAP10-7	4	0.65017	0.69459	1	12695	1	0.95859	0.010138	0.034002	0.524317	1239	3	0.95859	-1.99405
DAGLA	4	0.98835	0.98839	1	18455	0	0.86438	0.010142	0.034016	0.524317	1240	4	0.86438	-1.99388
CCDC93	4	0.92062	0.92064	1	17003	0	1.0488	0.010168	0.034093	0.525084	1241	3	1.0488	-1.99276
SLC38A2	4	0.74541	0.75739	1	13836	1	1.1417	0.0102	0.034192	0.525792	1242	3	1.1417	-1.9914
NUP54	4	0.95304	0.95316	1	17631	0	0.98323	0.010202	0.034194	0.525792	1243	2	0.98323	-1.99131
PPWD1	4	0.5529	0.64273	1	11772	1	1.0948	0.010214	0.034233	0.525941	1244	3	1.0948	-1.9908
PIK3C3	4	0.79417	0.79647	1	14545	1	0.87284	0.010223	0.034259	0.525941	1245	3	0.87284	-1.99042
FOXM1	4	0.83686	0.83702	1	15307	0	0.8654	0.010277	0.034435	0.528173	1246	2	0.8654	-1.98813
LRPPRC	4	0.90004	0.90006	1	16578	0	1.1068	0.010286	0.034464	0.528173	1247	2	1.1068	-1.98775
CPSF3	4	0.60547	0.66938	1	12255	1	1.3659	0.010301	0.034515	0.528173	1248	3	1.3659	-1.98712
DROSHA	4	0.9897	0.98978	1	18496	0	0.79078	0.010301	0.034515	0.528173	1249	4	0.79078	-1.98712
RAN	4	0.57438	0.65335	1	11961	1	-0.44332	0.010316	0.034557	0.528392	1250	1	-0.44332	-1.98649
PPIAL4E	4	0.87112	0.87119	1	16001	0	1.1984	0.010341	0.034619	0.528912	1251	2	1.1984	-1.98544
SKIV2L	4	0.98963	0.98972	1	18494	0	0.78405	0.010368	0.034707	0.529833	1252	4	0.78405	-1.98431
TYW3	4	0.98961	0.98969	1	18493	0	0.72981	0.010394	0.034785	0.530596	1253	4	0.72981	-1.98322
PPP2R4	4	0.74356	0.75602	1	13799	1	1.0305	0.010404	0.034817	0.53067	1254	3	1.0305	-1.9828
EXOC2	4	0.56243	0.64737	1	11860	1	0.99853	0.010456	0.034986	0.531797	1255	3	0.99853	-1.98063
OR52B6	4	0.98954	0.98962	1	18491	0	0.4567	0.010461	0.035003	0.531797	1256	4	0.4567	-1.98043
LY9	4	0.37529	0.52045	1	9590	2	0.60073	0.010493	0.035094	0.531797	1257	2	0.60073	-1.9791
TAF5L	4	0.79072	0.79351	1	14499	1	0.88504	0.010493	0.035094	0.531797	1258	3	0.88504	-1.9791
NACA	4	0.88134	0.88136	1	16229	0	1.2085	0.010508	0.03513	0.531797	1259	3	1.2085	-1.97848
CHIC1	4	0.98947	0.98956	1	18488	0	0.49403	0.010525	0.035185	0.531797	1260	4	0.49403	-1.97778
TSFM	4	0.98947	0.98956	1	18487	0	0.78157	0.010528	0.035193	0.531797	1261	4	0.78157	-1.97765
C19orf25	4	0.98947	0.98956	1	18486	0	0.64823	0.010528	0.035193	0.531797	1262	4	0.64823	-1.97765
GLMN	4	0.96686	0.96696	1	17939	0	0.87559	0.010531	0.035203	0.531797	1263	3	0.87559	-1.97753
CCDC28B	4	0.82569	0.82581	1	15099	1	0.7163	0.010533	0.035214	0.531797	1264	3	0.7163	-1.97745
GEMIN7	4	0.98798	0.98803	1	18441	0	0.98593	0.010539	0.035228	0.531797	1265	4	0.98593	-1.9772
SART1	4	0.26825	0.41101	1	7669	2	0.59174	0.010545	0.035247	0.531797	1266	2	0.59174	-1.97695
G6PD	4	0.98945	0.98954	1	18484	0	0.7892	0.010547	0.035253	0.531797	1267	4	0.7892	-1.97687
RPL10L	4	0.30541	0.4492	1	8322	2	0.4647	0.010563	0.03531	0.532245	1268	2	0.4647	-1.97621
CHTOP	4	0.98942	0.98952	1	18483	0	0.53899	0.010576	0.035348	0.532395	1269	4	0.53899	-1.97568
USP17L18	4	0.87708	0.87711	1	16142	0	0.9492	0.010596	0.035411	0.532505	1270	3	0.9492	-1.97486
IPPK	4	0.9546	0.95467	1	17664	0	0.83694	0.010607	0.035451	0.532505	1271	3	0.83694	-1.97441
GPX4	4	0.96942	0.96951	1	17993	0	0.73838	0.010616	0.035477	0.532505	1272	3	0.73838	-1.97404
WDTC1	4	0.68262	0.71429	1	13041	1	0.9189	0.01062	0.035487	0.532505	1273	3	0.9189	-1.97388
GAB2	4	0.98938	0.98947	1	18481	0	0.51943	0.010622	0.035495	0.532505	1274	4	0.51943	-1.97379
TIPIN	4	0.97322	0.97335	1	18076	0	1.2762	0.010683	0.035701	0.535185	1275	3	1.2762	-1.97131
CHD2	4	0.92847	0.92842	1	17150	0	0.88262	0.010704	0.035776	0.535883	1276	3	0.88262	-1.97045
DPH2	4	0.98508	0.98517	1	18369	0	1.1045	0.010751	0.035927	0.53772	1277	4	1.1045	-1.96855
TGFBR2	4	0.76605	0.77307	1	14128	1	0.69995	0.010775	0.035998	0.53812	1278	3	0.69995	-1.96758
TIMM23	4	0.41209	0.55839	1	10258	2	0.72884	0.010779	0.036011	0.53812	1279	2	0.72884	-1.96742
CPLX4	4	0.41763	0.56413	1	10357	1	0.8727	0.010791	0.03605	0.53812	1280	2	0.8727	-1.96694
NBPF6	4	0.9892	0.9893	1	18480	0	0.76358	0.010798	0.036077	0.53812	1281	4	0.76358	-1.96666
DNAJC9	4	0.98828	0.98832	1	18451	0	1.1022	0.010803	0.036096	0.53812	1282	4	1.1022	-1.96646
TSEN2	4	0.84267	0.84276	1	15445	0	0.79353	0.010822	0.036146	0.53812	1283	3	0.79353	-1.96569
THOC5	4	0.98918	0.98927	1	18479	0	0.54655	0.010825	0.036151	0.53812	1284	4	0.54655	-1.96557
PHOX2A	4	0.98916	0.98926	1	18478	0	0.66757	0.010839	0.036196	0.538188	1285	4	0.66757	-1.96501
IDUA	4	0.90164	0.90165	1	16606	0	0.57803	0.010845	0.036214	0.538188	1286	3	0.57803	-1.96477
PRKAB2	4	0.98915	0.98924	1	18477	0	0.67543	0.010853	0.03624	0.538188	1287	4	0.67543	-1.96445
NXT1	4	0.78833	0.79145	1	14457	1	0.34424	0.01088	0.036323	0.53889	1288	3	0.34424	-1.96337
CFAP45	4	0.048896	0.11932	0.937053	2429	1	0.91471	0.010887	0.036343	0.53889	1289	3	0.91471	-1.96309
PHIP	4	0.70977	0.73208	1	13388	1	1.1115	0.010906	0.036396	0.538891	1290	2	1.1115	-1.96233
PRSS23	4	0.98909	0.98918	1	18473	0	0.50883	0.010907	0.0364	0.538891	1291	4	0.50883	-1.96229
TAF2	4	0.97037	0.97048	1	18011	0	1.1254	0.010931	0.036479	0.539286	1292	3	1.1254	-1.96134
GTF2F2	4	0.82388	0.82404	1	15073	1	0.47458	0.010934	0.03649	0.539286	1293	2	0.47458	-1.96122
ATP5F1	4	0.86082	0.861	1	15813	0	0.88213	0.01094	0.036511	0.539286	1294	3	0.88213	-1.96098
XAB2	4	0.98903	0.98912	1	18471	0	1.147	0.010968	0.036601	0.5402	1295	4	1.147	-1.95987
CCDC186	4	0.43403	0.58102	1	10647	1	0.57373	0.011015	0.036757	0.541407	1296	3	0.57373	-1.95802
AIFM1	4	0.92523	0.92518	1	17090	0	0.86078	0.011021	0.036776	0.541407	1297	2	0.86078	-1.95778
TCOF1	4	0.98897	0.98905	1	18470	0	0.67076	0.011026	0.036791	0.541407	1298	4	0.67076	-1.95758
DSN1	4	0.88275	0.88281	1	16258	0	0.81599	0.011043	0.03685	0.541407	1299	3	0.81599	-1.95691
OSGEP	4	0.76425	0.77165	1	14099	1	0.69626	0.011046	0.036859	0.541407	1300	2	0.69626	-1.95679
TFRC	4	0.9749	0.97506	1	18111	0	0.80813	0.011058	0.036897	0.541407	1301	3	0.80813	-1.95632
RLF	4	0.4084	0.55456	1	10187	2	0.51554	0.011059	0.0369	0.541407	1302	2	0.51554	-1.95628
NAP1L4	4	0.68357	0.71492	1	13053	1	1.0254	0.011063	0.036912	0.541407	1303	3	1.0254	-1.95613
OR4F5	4	0.8876	0.88762	1	16354	0	1.0679	0.011072	0.036938	0.541407	1304	3	1.0679	-1.95577
GLTSCR1L	4	0.98888	0.98894	1	18469	0	0.65186	0.011122	0.037108	0.541545	1305	4	0.65186	-1.95382
TADA1	4	0.98865	0.98872	1	18461	0	1.151	0.011128	0.037124	0.541545	1306	4	1.151	-1.95358
UTP3	4	0.70005	0.72558	1	13263	1	1.5583	0.011136	0.037146	0.541545	1307	3	1.5583	-1.95327
HGC6.3	4	0.34482	0.48934	1	9031	1	-0.30845	0.011136	0.037146	0.541545	1308	1	-0.30845	-1.95327
OSBP	4	0.96099	0.96106	1	17806	0	1.1255	0.011136	0.037146	0.541545	1309	3	1.1255	-1.95327
RPS3	4	0.93859	0.93856	1	17376	0	1.1005	0.011136	0.037146	0.541545	1310	2	1.1005	-1.95327
ATRIP	4	0.2472	0.38939	1	7296	2	-0.037189	0.011136	0.037146	0.541545	1311	2	-0.037189	-1.95327
MKLN1	4	0.61286	0.67341	1	12332	1	0.76471	0.011147	0.037179	0.541623	1312	3	0.76471	-1.95284
WDR26	4	0.69791	0.72414	1	13234	1	0.85294	0.011222	0.03741	0.544566	1313	3	0.85294	-1.94993
PRH2	4	0.72881	0.74533	1	13615	1	0.99379	0.011276	0.037569	0.546472	1314	3	0.99379	-1.94784
C2orf70	4	0.80634	0.80742	1	14750	1	0.88002	0.011292	0.037619	0.546582	1315	2	0.88002	-1.94723
SUPV3L1	4	0.76523	0.7724	1	14112	1	0.83513	0.011297	0.037634	0.546582	1316	3	0.83513	-1.94704
ILDR1	4	0.97626	0.97641	1	18134	0	0.58953	0.011316	0.037687	0.546934	1317	3	0.58953	-1.94631
POMZP3	4	0.98866	0.98873	1	18462	0	0.68116	0.011339	0.037762	0.547508	1318	4	0.68116	-1.94543
RPL13	4	0.55617	0.64433	1	11803	1	1.2489	0.011345	0.037784	0.547508	1319	2	1.2489	-1.9452
UBTF	4	0.98864	0.9887	1	18460	0	0.75153	0.01136	0.037831	0.547769	1320	4	0.75153	-1.94462
MRPS5	4	0.086336	0.19029	0.973526	3735	1	1.0232	0.011412	0.037993	0.5497	1321	3	1.0232	-1.94264
ARFIP2	4	0.98857	0.98862	1	18459	0	0.59219	0.011433	0.038043	0.55001	1322	4	0.59219	-1.94184
RBFA	4	0.98854	0.98859	1	18458	0	1.1577	0.011458	0.038117	0.550665	1323	4	1.1577	-1.94089
FBXO11	4	0.39027	0.53577	1	9868	1	1.1582	0.011508	0.038278	0.552567	1324	3	1.1582	-1.939
MUS81	4	0.98847	0.98853	1	18456	0	0.97471	0.011527	0.038335	0.55298	1325	4	0.97471	-1.93828
HSCB	4	0.27021	0.413	1	7701	1	1.2286	0.01162	0.038624	0.556722	1326	3	1.2286	-1.93479
MED21	4	0.50387	0.61988	1	11349	1	0.88481	0.011639	0.038675	0.557048	1327	3	0.88481	-1.93408
NADK	4	0.9473	0.94736	1	17527	0	0.84468	0.011682	0.038803	0.55847	1328	3	0.84468	-1.93248
EPRS	4	0.98548	0.98556	1	18379	0	0.9611	0.011694	0.038841	0.558594	1329	4	0.9611	-1.93204
CDC20	4	0.98828	0.98832	1	18452	0	0.71685	0.011717	0.038904	0.559075	1330	4	0.71685	-1.93118
ALDH3B2	4	0.8555	0.85562	1	15701	0	0.72337	0.011763	0.039044	0.560571	1331	3	0.72337	-1.92948
XRN2	4	0.9743	0.97443	1	18098	0	1.0554	0.01177	0.039068	0.560571	1332	2	1.0554	-1.92922
CRLS1	4	0.9882	0.98824	1	18450	0	0.52428	0.011797	0.039145	0.560571	1333	4	0.52428	-1.92823
DLGAP4	4	0.30999	0.4539	1	8405	1	0.82774	0.011816	0.039195	0.560571	1334	3	0.82774	-1.92753
POLR3B	4	0.42332	0.57006	1	10464	1	0.99352	0.011816	0.039195	0.560571	1335	2	0.99352	-1.92753
EIF3E	4	0.98199	0.98208	1	18285	0	0.89274	0.011829	0.039235	0.560571	1336	4	0.89274	-1.92705
NDUFA10	4	0.50148	0.61884	1	11336	1	0.79356	0.011832	0.039243	0.560571	1337	3	0.79356	-1.92694
MED17	4	0.96681	0.9669	1	17938	0	0.83535	0.011832	0.039243	0.560571	1338	3	0.83535	-1.92694
CBFA2T2	4	0.98514	0.98524	1	18370	0	0.89072	0.011844	0.039288	0.560666	1339	4	0.89072	-1.9265
LOC101060389	4	0.90825	0.90822	1	16743	0	1.0016	0.011853	0.039308	0.560666	1340	3	1.0016	-1.92617
ZNF333	4	0.98813	0.98817	1	18448	0	0.46405	0.011868	0.039356	0.560927	1341	4	0.46405	-1.92562
MPI	4	0.98811	0.98814	1	18447	0	0.65068	0.011894	0.039439	0.561697	1342	4	0.65068	-1.92467
EIF4ENIF1	4	0.98809	0.98812	1	18445	0	0.66151	0.011914	0.039504	0.561789	1343	4	0.66151	-1.92394
TYMS	4	0.0055411	0.019235	0.869122	423	1	1.1379	0.011914	0.039504	0.561789	1344	3	1.1379	-1.92394
NETO2	4	0.98805	0.98809	1	18444	0	0.47483	0.011947	0.039598	0.562334	1345	4	0.47483	-1.92274
SHOC2	4	0.29703	0.44061	1	8186	1	0.91659	0.011955	0.039621	0.562334	1346	3	0.91659	-1.92245
BAZ2A	4	0.98804	0.98808	1	18443	0	0.41984	0.011962	0.039641	0.562334	1347	4	0.41984	-1.9222
RCC1	4	0.98802	0.98806	1	18442	0	0.58044	0.011977	0.03969	0.562334	1348	4	0.58044	-1.92165
CXCL8	4	0.92719	0.92717	1	17128	0	0.62298	0.011978	0.03969	0.562334	1349	2	0.62298	-1.92162
UQCRB	4	0.84717	0.84728	1	15531	0	1.3077	0.011987	0.039722	0.562373	1350	3	1.3077	-1.92129
NUP205	4	0.9875	0.98756	1	18427	0	1.1667	0.012058	0.039939	0.56477	1351	4	1.1667	-1.91872
TXN2	4	0.47607	0.60769	1	11144	1	1.1073	0.012062	0.03995	0.56477	1352	3	1.1073	-1.91858
SP140	4	0.98791	0.98796	1	18440	0	0.42261	0.01209	0.040032	0.565127	1353	4	0.42261	-1.91757
BLZF1	4	0.9132	0.91314	1	16842	0	0.86387	0.012097	0.040055	0.565127	1354	3	0.86387	-1.91732
TPK1	4	0.9879	0.98795	1	18439	0	0.54947	0.012101	0.040064	0.565127	1355	4	0.54947	-1.91718
LRRC45	4	0.15918	0.29925	1	5704	2	0.35203	0.012134	0.04017	0.566016	1356	2	0.35203	-1.916
GHITM	4	0.98786	0.98791	1	18438	0	0.41108	0.012139	0.040186	0.566016	1357	4	0.41108	-1.91582
MICALL2	4	0.98781	0.98786	1	18436	0	0.47239	0.012193	0.040356	0.567991	1358	4	0.47239	-1.91389
BRD2	4	0.89054	0.89056	1	16412	0	1.0781	0.012209	0.040406	0.568239	1359	2	1.0781	-1.91332
ATP1A1	4	0.81307	0.81366	1	14886	1	1.262	0.012232	0.040467	0.568239	1360	3	1.262	-1.9125
WDR17	4	0.98777	0.98782	1	18435	0	0.52419	0.012234	0.04047	0.568239	1361	4	0.52419	-1.91243
CHUK	4	0.97723	0.97736	1	18154	0	1.0527	0.012246	0.040502	0.568239	1362	3	1.0527	-1.91201
DDX53	4	0.27097	0.41378	1	7715	2	0.65579	0.012252	0.040523	0.568239	1363	2	0.65579	-1.91179
MON2	4	0.98114	0.98124	1	18263	0	0.69346	0.012305	0.040696	0.570247	1364	4	0.69346	-1.90992
RAB29	4	0.28249	0.42563	1	7923	1	0.84798	0.012325	0.040754	0.570642	1365	3	0.84798	-1.90921
SF3B2	4	0.78725	0.79053	1	14440	1	0.42975	0.012365	0.040887	0.571764	1366	2	0.42975	-1.90781
CWF19L1	4	0.94813	0.94819	1	17544	0	0.91219	0.012377	0.040921	0.571764	1367	3	0.91219	-1.90738
ELP4	4	0.98761	0.98767	1	18433	0	0.9958	0.012389	0.040957	0.571764	1368	4	0.9958	-1.90696
CAND1	4	0.97519	0.97534	1	18117	0	0.92955	0.01239	0.040958	0.571764	1369	3	0.92955	-1.90693
TARS2	4	0.94599	0.94603	1	17503	0	0.94134	0.012404	0.041013	0.571764	1370	3	0.94134	-1.90644
LRCOL1	4	0.98759	0.98764	1	18432	0	0.7248	0.012412	0.041035	0.571764	1371	4	0.7248	-1.90616
MRPS30	4	0.069552	0.15916	0.962729	3153	3	-0.37897	0.012416	0.041043	0.571764	1372	1	-0.37897	-1.90602
MTFR1L	4	0.98753	0.98759	1	18429	0	0.3216	0.012466	0.041197	0.573086	1373	4	0.3216	-1.90427
STIL	4	0.76574	0.77282	1	14124	1	0.84369	0.012469	0.041198	0.573086	1374	3	0.84369	-1.90417
MGAT1	4	0.60889	0.67124	1	12289	1	0.81502	0.012503	0.041303	0.573714	1375	3	0.81502	-1.90299
ATXN2L	4	0.9875	0.98756	1	18426	0	0.69678	0.012503	0.041303	0.573714	1376	4	0.69678	-1.90299
WBSCR16	4	0.65413	0.69691	1	12732	1	1.2163	0.012569	0.041517	0.576266	1377	3	1.2163	-1.9007
MED8	4	0.9874	0.98746	1	18423	0	0.70156	0.012603	0.04164	0.576266	1378	4	0.70156	-1.89953
RPL37	4	0.54788	0.64034	1	11723	1	0.764	0.01262	0.041698	0.576266	1379	2	0.764	-1.89894
POLR2D	4	0.8991	0.89912	1	16564	0	0.33011	0.01262	0.041698	0.576266	1380	2	0.33011	-1.89894
DIS3	4	0.93782	0.93779	1	17350	0	0.85271	0.01262	0.041698	0.576266	1381	3	0.85271	-1.89894
CPSF3L	4	0.042912	0.10762	0.926657	2216	3	-0.68323	0.01262	0.041698	0.576266	1382	1	-0.68323	-1.89894
RPS26	4	0.77455	0.77994	1	14242	1	0.63348	0.01262	0.041698	0.576266	1383	2	0.63348	-1.89894
ADAMTS4	4	0.76679	0.77366	1	14142	1	0.72525	0.012646	0.041772	0.576872	1384	3	0.72525	-1.89805
MLH3	4	0.9873	0.98737	1	18422	0	0.53104	0.012697	0.041919	0.577493	1385	4	0.53104	-1.8963
CTNND2	4	0.22629	0.368	1	6920	1	1.0081	0.012702	0.041935	0.577493	1386	3	1.0081	-1.89613
PHKA2	4	0.95905	0.9591	1	17762	0	0.77417	0.012702	0.041935	0.577493	1387	3	0.77417	-1.89613
CREB1	4	0.36363	0.50849	1	9380	1	0.93486	0.012724	0.041995	0.577493	1388	3	0.93486	-1.89538
VPS72	4	0.98727	0.98734	1	18421	0	0.62193	0.012727	0.042002	0.577493	1389	4	0.62193	-1.89527
BNIP2	4	0.98727	0.98734	1	18420	0	0.6688	0.012731	0.042017	0.577493	1390	4	0.6688	-1.89514
SLC25A19	4	0.95574	0.95578	1	17683	0	0.71539	0.012736	0.042029	0.577493	1391	3	0.71539	-1.89497
ALG14	4	0.98724	0.98731	1	18419	0	0.41954	0.012759	0.042103	0.578095	1392	4	0.41954	-1.89418
UBA5	4	0.98723	0.9873	1	18418	0	0.53975	0.01277	0.042138	0.578163	1393	4	0.53975	-1.89381
PHF8	4	0.69742	0.72382	1	13228	1	0.91068	0.012803	0.042231	0.578924	1394	3	0.91068	-1.89269
FAM231A	4	0.98718	0.98725	1	18417	0	0.78341	0.012822	0.042287	0.578924	1395	4	0.78341	-1.89204
CALML6	4	0.98717	0.98724	1	18416	0	0.75839	0.012826	0.042304	0.578924	1396	4	0.75839	-1.89191
RPS19BP1	4	0.40756	0.5537	1	10172	2	0.54148	0.01283	0.042315	0.578924	1397	2	0.54148	-1.89177
RBM19	4	0.96448	0.96459	1	17884	0	0.38502	0.012876	0.042457	0.580465	1398	3	0.38502	-1.89022
RBM14	4	0.36036	0.50518	1	9321	1	0.97538	0.012917	0.042581	0.581715	1399	3	0.97538	-1.88884
HIST1H2BN	4	0.98159	0.98169	1	18276	0	0.93479	0.012927	0.04261	0.581715	1400	4	0.93479	-1.8885
B4GALT2	4	0.98702	0.98709	1	18415	0	0.67802	0.012985	0.042778	0.583204	1401	4	0.67802	-1.88656
CENPO	4	0.98701	0.98709	1	18414	0	0.37552	0.01299	0.042793	0.583204	1402	4	0.37552	-1.88639
SUZ12	4	0.987	0.98708	1	18413	0	0.64714	0.012999	0.042828	0.583204	1403	4	0.64714	-1.88609
TGFBR1	4	0.95411	0.95419	1	17650	0	0.89009	0.013005	0.042851	0.583204	1404	3	0.89009	-1.88589
PBX1	4	0.98699	0.98706	1	18412	0	1.1258	0.013012	0.042871	0.583204	1405	4	1.1258	-1.88566
NCAPD3	4	0.95445	0.95452	1	17661	0	0.92883	0.013025	0.042913	0.583352	1406	3	0.92883	-1.88522
MRPL38	4	0.98694	0.98702	1	18411	0	0.78353	0.013059	0.043001	0.584134	1407	4	0.78353	-1.88409
THG1L	4	0.94197	0.94196	1	17438	0	0.49561	0.013081	0.043068	0.584484	1408	3	0.49561	-1.88336
NKTR	4	0.27237	0.41526	1	7735	1	0.85202	0.013106	0.043143	0.584484	1409	3	0.85202	-1.88253
KIFC1	4	0.98688	0.98695	1	18408	0	0.33333	0.013118	0.043174	0.584484	1410	4	0.33333	-1.88213
RBX1	4	0.87233	0.87242	1	16036	0	0.88328	0.01312	0.043179	0.584484	1411	2	0.88328	-1.88207
RANBP1	4	0.98319	0.9833	1	18322	0	0.73766	0.01312	0.04318	0.584484	1412	4	0.73766	-1.88207
SMARCC1	4	0.78509	0.78868	1	14406	1	0.90425	0.013139	0.043241	0.584546	1413	3	0.90425	-1.88144
SLX4	4	0.55545	0.64398	1	11797	1	0.93655	0.013154	0.043289	0.584546	1414	2	0.93655	-1.88094
OR4F16	4	0.53708	0.63512	1	11625	1	1.0378	0.013161	0.043307	0.584546	1415	3	1.0378	-1.88071
EPS15L1	4	0.1602	0.30032	1	5719	1	0.83053	0.013161	0.043307	0.584546	1416	3	0.83053	-1.88071
ADPRH	4	0.98681	0.98689	1	18407	0	0.37722	0.013189	0.043404	0.585383	1417	4	0.37722	-1.87979
TRIM49	4	0.095233	0.20648	0.978096	4032	1	0.32229	0.013209	0.04346	0.585383	1418	2	0.32229	-1.87913
SPG11	4	0.98679	0.98687	1	18406	0	0.56045	0.013209	0.04346	0.585383	1419	4	0.56045	-1.87913
USP17L29	4	0.72399	0.74186	1	13546	1	0.82936	0.013273	0.043654	0.587332	1420	2	0.82936	-1.87703
GNRH2	4	0.76206	0.76994	1	14078	1	0.74271	0.013278	0.043667	0.587332	1421	3	0.74271	-1.87687
FAM35A	4	0.85335	0.85344	1	15652	0	0.61074	0.01329	0.043705	0.587434	1422	2	0.61074	-1.87648
MRPS11	4	0.91951	0.91953	1	16979	0	0.8067	0.013362	0.043925	0.589979	1423	3	0.8067	-1.87413
NAALADL2	4	0.92949	0.9294	1	17169	0	0.54373	0.013385	0.043994	0.590496	1424	2	0.54373	-1.87338
ZC3H8	4	0.68525	0.71594	1	13081	1	0.86694	0.013395	0.044027	0.590519	1425	3	0.86694	-1.87306
CKS1B	4	0.81368	0.81424	1	14902	1	0.54852	0.013439	0.044164	0.591945	1426	3	0.54852	-1.87163
C11orf63	4	0.98651	0.98659	1	18404	0	0.52559	0.013488	0.044304	0.592499	1427	4	0.52559	-1.87005
ONECUT1	4	0.9865	0.98657	1	18403	0	0.3847	0.013501	0.044337	0.592499	1428	4	0.3847	-1.86963
PSMD5	4	0.9865	0.98657	1	18402	0	0.92961	0.013504	0.044346	0.592499	1429	4	0.92961	-1.86954
KANSL3	4	0.98649	0.98657	1	18401	0	1.0513	0.013508	0.04436	0.592499	1430	4	1.0513	-1.86941
SLAIN2	4	0.74359	0.75605	1	13801	1	0.62753	0.013509	0.044361	0.592499	1431	2	0.62753	-1.86938
BOLA2B	4	0.98647	0.98654	1	18400	0	0.40299	0.013534	0.044447	0.593233	1432	4	0.40299	-1.86857
ZNF619	4	0.86964	0.86968	1	15970	0	0.83469	0.013543	0.044484	0.593317	1433	3	0.83469	-1.86829
PDXK	4	0.98644	0.98652	1	18399	0	0.37838	0.013557	0.044524	0.593435	1434	4	0.37838	-1.86784
TFB2M	4	0.98564	0.98572	1	18382	0	0.95555	0.013616	0.044682	0.594718	1435	4	0.95555	-1.86595
PSMA5	4	0.936	0.93593	1	17300	0	1.2239	0.013616	0.044682	0.594718	1436	3	1.2239	-1.86595
TMED3	4	0.056039	0.13323	0.942848	2697	1	0.68615	0.013629	0.044727	0.594903	1437	3	0.68615	-1.86554
UBA2	4	0.55642	0.64446	1	11807	1	0.70618	0.013643	0.044769	0.594936	1438	3	0.70618	-1.86509
FAM131C	4	0.96842	0.96851	1	17977	0	0.61981	0.013651	0.044796	0.594936	1439	3	0.61981	-1.86484
KRT9	4	0.98634	0.98642	1	18398	0	0.48629	0.013657	0.044823	0.594936	1440	4	0.48629	-1.86464
LRRC4B	4	0.6167	0.67555	1	12369	1	0.82413	0.013672	0.044866	0.595093	1441	3	0.82413	-1.86417
RRAGC	4	0.97915	0.97929	1	18209	0	0.78256	0.013889	0.045523	0.603024	1442	3	0.78256	-1.85733
COMMD3	4	0.98611	0.98618	1	18396	0	0.95798	0.013892	0.045527	0.603024	1443	4	0.95798	-1.85724
EPHA4	4	0.98608	0.98615	1	18395	0	0.53251	0.013921	0.045622	0.603799	1444	4	0.53251	-1.85633
STAT3	4	0.98607	0.98614	1	18394	0	0.63378	0.013928	0.045649	0.603799	1445	4	0.63378	-1.85611
EIF4A3	4	0.83898	0.83911	1	15353	0	0.92811	0.013976	0.045797	0.605134	1446	2	0.92811	-1.85462
ZFX	4	0.64737	0.69294	1	12668	1	1.0321	0.01398	0.045813	0.605134	1447	2	1.0321	-1.85449
DIMT1	4	0.85399	0.8541	1	15668	0	0.8917	0.014052	0.046058	0.60779	1448	2	0.8917	-1.85226
SMC6	4	0.6435	0.6907	1	12623	1	0.90836	0.014061	0.046078	0.60779	1449	3	0.90836	-1.85198
MRPL45	4	0.26903	0.41182	1	7686	1	1.031	0.014075	0.046129	0.608047	1450	3	1.031	-1.85155
TCEB1	4	0.9859	0.98598	1	18391	0	0.65778	0.014097	0.046199	0.608542	1451	4	0.65778	-1.85087
F2	4	0.98585	0.98593	1	18390	0	0.84757	0.014151	0.046361	0.609673	1452	4	0.84757	-1.84921
ATAD3C	4	0.1749	0.31547	1	5955	2	0.41875	0.014162	0.046402	0.609673	1453	2	0.41875	-1.84888
ZNFX1	4	0.64261	0.69016	1	12614	1	0.67431	0.014163	0.046404	0.609673	1454	3	0.67431	-1.84884
RPP14	4	0.45262	0.59761	1	10960	1	0.61538	0.014166	0.046412	0.609673	1455	3	0.61538	-1.84875
MXRA5	4	0.097882	0.21126	0.979765	4118	2	0.36316	0.014176	0.046444	0.609676	1456	2	0.36316	-1.84845
SLC30A4	4	0.98581	0.98588	1	18388	0	0.73448	0.014189	0.046482	0.609754	1457	4	0.73448	-1.84805
UBE2J1	4	0.85698	0.85715	1	15734	0	0.75067	0.014197	0.046514	0.609756	1458	3	0.75067	-1.8478
POLR2B	4	0.46865	0.60446	1	11083	1	0.99038	0.014215	0.046574	0.610119	1459	3	0.99038	-1.84725
KDM1A	4	0.98577	0.98583	1	18386	0	0.74115	0.014234	0.046626	0.610386	1460	4	0.74115	-1.84667
LAMTOR5	4	0.98574	0.98581	1	18385	0	0.57617	0.014263	0.046725	0.611262	1461	4	0.57617	-1.84579
PLA2G4F	4	0.95858	0.95865	1	17749	0	0.67711	0.014282	0.046781	0.611576	1462	3	0.67711	-1.84521
TEKT2	4	0.93406	0.934	1	17262	0	0.73135	0.014331	0.046938	0.613208	1463	2	0.73135	-1.84372
RRP36	4	0.85124	0.85132	1	15613	0	0.8974	0.014374	0.047063	0.614426	1464	2	0.8974	-1.84242
GNPNAT1	4	0.31124	0.45519	1	8419	1	0.91283	0.014395	0.047131	0.614722	1465	3	0.91283	-1.84179
SLC6A17	4	0.9573	0.95737	1	17717	0	0.75373	0.014404	0.047165	0.614722	1466	3	0.75373	-1.84152
HIST4H4	4	0.48548	0.61173	1	11205	1	0.45109	0.01441	0.047182	0.614722	1467	2	0.45109	-1.84134
FAM98B	4	0.013694	0.044943	0.881925	974	1	0.85228	0.014423	0.047219	0.614782	1468	2	0.85228	-1.84094
KCNS2	4	0.98373	0.98384	1	18340	0	0.92157	0.014451	0.047303	0.615394	1469	4	0.92157	-1.8401
PFDN5	4	0.64278	0.69027	1	12617	1	1.004	0.014461	0.047331	0.615394	1470	3	1.004	-1.8398
PGM3	4	0.8504	0.85048	1	15595	0	1.2491	0.014471	0.047364	0.615406	1471	3	1.2491	-1.8395
ITGB1	4	0.078831	0.17661	0.97262	3457	1	0.59233	0.01451	0.047484	0.615793	1472	3	0.59233	-1.83833
SEC63	4	0.72753	0.7444	1	13592	1	0.63053	0.014512	0.047489	0.615793	1473	2	0.63053	-1.83827
RAD51B	4	0.98549	0.98557	1	18380	0	0.45232	0.014512	0.04749	0.615793	1474	4	0.45232	-1.83827
LMTK3	4	0.80285	0.80423	1	14691	1	0.90281	0.01453	0.04755	0.615881	1475	3	0.90281	-1.83773
TRIAP1	4	0.95579	0.95583	1	17685	0	0.97257	0.014544	0.047589	0.615881	1476	3	0.97257	-1.83732
LLGL2	4	0.98545	0.98553	1	18378	0	0.42129	0.014551	0.047611	0.615881	1477	4	0.42129	-1.83711
SCUBE3	4	0.64959	0.69426	1	12687	1	0.84671	0.014555	0.047626	0.615881	1478	3	0.84671	-1.83699
DYNC1I2	4	0.98539	0.98548	1	18377	0	0.58014	0.014605	0.047765	0.616577	1479	4	0.58014	-1.8355
ZNF408	4	0.31532	0.45927	1	8488	2	-0.18657	0.014614	0.04779	0.616577	1480	1	-0.18657	-1.83523
MIEF1	4	0.98538	0.98547	1	18376	0	0.95303	0.014616	0.047795	0.616577	1481	4	0.95303	-1.83517
LCMT1	4	0.98537	0.98545	1	18375	0	1.0515	0.014622	0.047809	0.616577	1482	4	1.0515	-1.83499
DCN	4	0.93166	0.93162	1	17217	0	0.67838	0.014679	0.047986	0.618036	1483	3	0.67838	-1.8333
NDUFA2	4	0.95761	0.95768	1	17728	0	0.86391	0.014679	0.047987	0.618036	1484	3	0.86391	-1.8333
C7orf57	4	0.9853	0.98538	1	18373	0	0.37878	0.014697	0.048042	0.618036	1485	4	0.37878	-1.83277
SMC1A	4	0.90933	0.90931	1	16758	0	0.89125	0.014701	0.048051	0.618036	1486	3	0.89125	-1.83265
GPN1	4	0.53827	0.63568	1	11638	1	1.1193	0.014767	0.048246	0.61974	1487	3	1.1193	-1.83071
GFPT1	4	0.91441	0.91436	1	16861	0	0.97113	0.014768	0.048248	0.61974	1488	2	0.97113	-1.83068
PPP1CA	4	0.96992	0.97003	1	18003	0	1.0742	0.014791	0.048313	0.620155	1489	3	1.0742	-1.83
SMC3	4	0.98519	0.98528	1	18372	0	1.3676	0.014809	0.048374	0.620516	1490	4	1.3676	-1.82947
CRKL	4	0.98516	0.98525	1	18371	0	0.38766	0.014844	0.048477	0.621428	1491	4	0.38766	-1.82845
XYLT1	4	0.98506	0.98515	1	18368	0	0.35098	0.01494	0.048768	0.624728	1492	4	0.35098	-1.82565
MYL7	4	0.95676	0.95683	1	17706	0	0.76537	0.014957	0.048816	0.624899	1493	3	0.76537	-1.82516
TRAPPC11	4	0.93403	0.93397	1	17261	0	0.96929	0.014966	0.048846	0.624899	1494	3	0.96929	-1.82489
FARSA	4	0.85117	0.85125	1	15612	0	1.2378	0.014991	0.048928	0.625484	1495	3	1.2378	-1.82417
NWD1	4	0.83197	0.83214	1	15221	0	0.73174	0.01501	0.048975	0.625484	1496	2	0.73174	-1.82362
MRPL1	4	0.98498	0.98508	1	18366	0	0.66747	0.015015	0.048997	0.625484	1497	4	0.66747	-1.82347
ASUN	4	0.89534	0.89536	1	16505	0	0.80064	0.015025	0.049023	0.625484	1498	3	0.80064	-1.82319
METTL11B	4	0.98493	0.98503	1	18364	0	0.57414	0.015065	0.049161	0.626096	1499	4	0.57414	-1.82203
CDC26	4	0.98367	0.98378	1	18337	0	1.0011	0.01507	0.049175	0.626096	1500	4	1.0011	-1.82189
LRBA	4	0.98492	0.98501	1	18363	0	0.30357	0.01508	0.049201	0.626096	1501	4	0.30357	-1.8216
CCDC73	4	0.38284	0.52817	1	9727	2	0.6306	0.015089	0.049231	0.626096	1502	2	0.6306	-1.82134
FAM46A	4	0.98154	0.98163	1	18273	0	1.1455	0.015099	0.049259	0.626096	1503	4	1.1455	-1.82105
SNRPG	4	0.9849	0.985	1	18362	0	0.79715	0.015102	0.049267	0.626096	1504	4	0.79715	-1.82097
ADH4	4	0.98488	0.98498	1	18361	0	0.60091	0.015117	0.049309	0.626213	1505	4	0.60091	-1.82053
FBLIM1	4	0.32953	0.47378	1	8754	1	0.72003	0.015149	0.04941	0.62658	1506	3	0.72003	-1.81962
ZC3H10	4	0.69961	0.72529	1	13258	1	0.58435	0.015169	0.049471	0.62658	1507	3	0.58435	-1.81904
POLR2L	4	0.38702	0.53247	1	9811	1	1.0785	0.015176	0.04949	0.62658	1508	3	1.0785	-1.81884
PPTC7	4	0.47599	0.60765	1	11143	1	0.86633	0.015188	0.049527	0.62658	1509	3	0.86633	-1.8185
ARL1	4	0.9848	0.9849	1	18360	0	0.46282	0.015196	0.049546	0.62658	1510	4	0.46282	-1.81827
PRDM12	4	0.85301	0.85308	1	15644	0	0.83904	0.015204	0.049576	0.62658	1511	3	0.83904	-1.81804
EIF3H	4	0.98219	0.98228	1	18289	0	1.1737	0.015205	0.049582	0.62658	1512	4	1.1737	-1.81801
UNC93B1	4	0.98479	0.98489	1	18359	0	0.69587	0.015212	0.049601	0.62658	1513	4	0.69587	-1.81781
SNAPC1	4	0.96828	0.96837	1	17973	0	0.96546	0.015228	0.049649	0.62678	1514	3	0.96546	-1.81736
MAGEH1	4	0.9834	0.98352	1	18328	0	0.80798	0.015302	0.049882	0.629308	1515	4	0.80798	-1.81525
GZMA	4	0.1369	0.27639	0.989794	5337	1	0.84999	0.015431	0.050262	0.633673	1516	3	0.84999	-1.81161
ARGLU1	4	0.84855	0.84866	1	15562	0	0.97358	0.015453	0.050339	0.634234	1517	3	0.97358	-1.81099
UBE3D	4	0.32616	0.47034	1	8692	2	0.67569	0.015475	0.050404	0.634487	1518	2	0.67569	-1.81037
CELSR2	4	0.91876	0.91878	1	16957	0	0.58961	0.015495	0.05047	0.634487	1519	3	0.58961	-1.80981
SFSWAP	4	0.48507	0.61156	1	11202	1	0.68431	0.0155	0.050488	0.634487	1520	3	0.68431	-1.80967
FAM110D	4	0.069128	0.15836	0.962729	3137	1	0.62398	0.015502	0.050492	0.634487	1521	3	0.62398	-1.80961
STRIP1	4	0.71891	0.73829	1	13487	1	1.0142	0.015548	0.050636	0.635681	1522	3	1.0142	-1.80833
NDUFB2	4	0.98444	0.98456	1	18357	0	0.51403	0.015563	0.050687	0.635681	1523	4	0.51403	-1.80791
CCDC134	4	0.98444	0.98456	1	18356	0	0.28336	0.015563	0.050687	0.635681	1524	4	0.28336	-1.80791
DNM2	4	0.90287	0.90287	1	16640	0	0.55839	0.015666	0.050977	0.638624	1525	2	0.55839	-1.80504
MRPS22	4	0.88744	0.88747	1	16351	0	1.0361	0.01567	0.050988	0.638624	1526	3	1.0361	-1.80493
NBAS	4	0.95242	0.95254	1	17620	0	1.0028	0.015705	0.051091	0.639455	1527	3	1.0028	-1.80396
NUTM2A	4	0.88311	0.88318	1	16267	0	0.81649	0.015724	0.051146	0.639455	1528	2	0.81649	-1.80344
HIST1H3F	4	0.98427	0.9844	1	18355	0	0.58128	0.015729	0.051159	0.639455	1529	4	0.58128	-1.8033
TADA2A	4	0.98118	0.98127	1	18264	0	1.0437	0.015747	0.051201	0.639455	1530	4	1.0437	-1.8028
RASSF8	4	0.98424	0.98437	1	18354	0	0.61557	0.015755	0.051222	0.639455	1531	4	0.61557	-1.80258
TMEM262	4	0.98422	0.98434	1	18353	0	0.53321	0.015777	0.051283	0.639641	1532	4	0.53321	-1.80198
MRPL14	4	0.95761	0.95768	1	17727	0	1.2826	0.015783	0.051304	0.639641	1533	3	1.2826	-1.80181
NPM1	4	0.98414	0.98427	1	18352	0	0.7819	0.015856	0.051523	0.641536	1534	4	0.7819	-1.79981
ALG12	4	0.98414	0.98427	1	18351	0	0.72107	0.015856	0.051523	0.641536	1535	4	0.72107	-1.79981
C1QTNF9B	4	0.98413	0.98425	1	18350	0	0.3355	0.015874	0.051585	0.641892	1536	4	0.3355	-1.79931
TAF8	4	0.86123	0.86139	1	15822	0	0.58151	0.015924	0.051736	0.643008	1537	2	0.58151	-1.79795
FAM156B	4	0.96898	0.96904	1	17985	0	1.0232	0.015935	0.051772	0.643008	1538	3	1.0232	-1.79765
GPR3	4	0.98406	0.98418	1	18349	0	0.46076	0.015938	0.051776	0.643008	1539	4	0.46076	-1.79757
POLR2C	4	0.9086	0.90857	1	16747	0	1.002	0.015967	0.051853	0.643548	1540	3	1.002	-1.79678
CHMP3	4	0.95951	0.95956	1	17769	0	0.75005	0.015992	0.051939	0.643966	1541	3	0.75005	-1.7961
NPIPA7	4	0.87585	0.87591	1	16111	0	0.77095	0.016001	0.051954	0.643966	1542	3	0.77095	-1.79585
SETD2	4	0.83313	0.83327	1	15242	0	0.73434	0.016024	0.052024	0.644102	1543	3	0.73434	-1.79523
NSUN4	4	0.95455	0.95462	1	17663	0	0.66493	0.016027	0.052038	0.644102	1544	3	0.66493	-1.79515
CSE1L	4	0.72402	0.74188	1	13547	1	1.3046	0.016052	0.052123	0.644102	1545	3	1.3046	-1.79447
ECD	4	0.83898	0.83911	1	15338	0	1.1611	0.016065	0.052153	0.644102	1546	2	1.1611	-1.79412
PCDHB4	4	0.086819	0.19119	0.974696	3748	1	0.86701	0.016065	0.052153	0.644102	1547	3	0.86701	-1.79412
AKAP9	4	0.98392	0.98404	1	18346	0	0.7055	0.016082	0.052197	0.644102	1548	4	0.7055	-1.79366
FAM60A	4	0.87159	0.87165	1	16014	0	0.6891	0.016095	0.052234	0.644102	1549	2	0.6891	-1.79331
MAVS	4	0.9839	0.98402	1	18345	0	0.35466	0.016099	0.052249	0.644102	1550	4	0.35466	-1.7932
HAPLN2	4	0.98389	0.984	1	18344	0	0.34678	0.016112	0.052286	0.644102	1551	4	0.34678	-1.79285
SLC2A1	4	0.95672	0.95678	1	17703	0	0.79537	0.01612	0.052307	0.644102	1552	3	0.79537	-1.79263
SLC35A2	4	0.70088	0.72612	1	13275	1	0.89916	0.016142	0.052379	0.644102	1553	3	0.89916	-1.79204
SLC51B	4	0.98385	0.98397	1	18343	0	0.41577	0.01615	0.052397	0.644102	1554	4	0.41577	-1.79183
MED23	4	0.98385	0.98396	1	18342	0	0.31805	0.016152	0.052403	0.644102	1555	4	0.31805	-1.79177
WDR33	4	0.98382	0.98394	1	18341	0	0.89738	0.016177	0.05248	0.64463	1556	4	0.89738	-1.7911
ZNF506	4	0.66096	0.70097	1	12811	1	-0.042777	0.016197	0.052547	0.645036	1557	1	-0.042777	-1.79057
RPTOR	4	0.97264	0.97275	1	18063	0	0.82284	0.016224	0.052645	0.64583	1558	3	0.82284	-1.78984
CARF	4	0.91286	0.91281	1	16832	0	0.93886	0.01624	0.052693	0.646009	1559	3	0.93886	-1.78941
PBRM1	4	0.98372	0.98384	1	18339	0	0.90347	0.016276	0.052793	0.646811	1560	4	0.90347	-1.78845
PRKAR1A	4	0.98371	0.98382	1	18338	0	0.67138	0.016294	0.052844	0.647024	1561	4	0.67138	-1.78797
RIOK1	4	0.98364	0.98375	1	18335	0	0.94904	0.01636	0.053045	0.648265	1562	4	0.94904	-1.78622
RRM2	4	0.76193	0.76985	1	14075	1	1.3125	0.016361	0.053047	0.648265	1563	2	1.3125	-1.78619
RPL14	4	0.83898	0.83911	1	15359	0	1.2112	0.016361	0.053047	0.648265	1564	2	1.2112	-1.78619
BATF3	4	0.98362	0.98374	1	18334	0	0.5571	0.016377	0.053093	0.648407	1565	4	0.5571	-1.78577
PRPF3	4	0.94664	0.94668	1	17510	0	0.89405	0.016432	0.053264	0.648889	1566	3	0.89405	-1.78431
CSNK2B	4	0.98356	0.98369	1	18333	0	0.70038	0.016442	0.053295	0.648889	1567	4	0.70038	-1.78405
TOR4A	4	0.94657	0.9466	1	17508	0	0.806	0.016447	0.053311	0.648889	1568	3	0.806	-1.78391
MPHOSPH6	4	0.55733	0.64488	1	11816	1	0.99623	0.016455	0.053335	0.648889	1569	3	0.99623	-1.7837
MROH8	4	0.98352	0.98365	1	18331	0	0.3739	0.016482	0.053409	0.648889	1570	4	0.3739	-1.78299
PSMG4	4	0.33014	0.4744	1	8765	1	1.0992	0.016485	0.053419	0.648889	1571	3	1.0992	-1.78291
DCTN2	4	0.95813	0.95819	1	17737	0	0.89836	0.016486	0.053421	0.648889	1572	3	0.89836	-1.78288
CTU2	4	0.97263	0.97274	1	18062	0	1.2602	0.016486	0.053421	0.648889	1573	3	1.2602	-1.78288
ZSCAN16	4	0.93219	0.93214	1	17228	0	0.58987	0.016492	0.053438	0.648889	1574	2	0.58987	-1.78273
TOMM70A	4	0.80021	0.80189	1	14652	1	0.98034	0.016515	0.053502	0.649228	1575	3	0.98034	-1.78212
CYP17A1	4	0.98347	0.9836	1	18330	0	0.62034	0.01653	0.053533	0.649228	1576	4	0.62034	-1.78173
OGFR	4	0.98341	0.98354	1	18329	0	0.57597	0.016588	0.0537	0.650832	1577	4	0.57597	-1.78021
FIP1L1	4	0.98339	0.98351	1	18327	0	0.68575	0.016606	0.053752	0.651049	1578	4	0.68575	-1.77973
HES3	4	0.39802	0.54382	1	10006	1	0.63677	0.016621	0.053798	0.651049	1579	2	0.63677	-1.77934
NSA2	4	0.85691	0.85706	1	15733	0	0.91139	0.016651	0.053879	0.651049	1580	2	0.91139	-1.77856
PPP1R2	4	0.98335	0.98346	1	18326	0	0.84368	0.016653	0.053883	0.651049	1581	4	0.84368	-1.77851
SUPT4H1	4	0.83898	0.83911	1	15364	0	0.53279	0.016656	0.053894	0.651049	1582	2	0.53279	-1.77843
RBL1	4	0.98333	0.98345	1	18325	0	0.81619	0.016666	0.053927	0.651049	1583	4	0.81619	-1.77817
KIAA0922	4	0.98332	0.98344	1	18324	0	0.3683	0.016675	0.053956	0.651049	1584	4	0.3683	-1.77793
FIGNL2	4	0.69519	0.72234	1	13202	1	1.0107	0.016697	0.054013	0.65132	1585	3	1.0107	-1.77736
C11orf57	4	0.98329	0.9834	1	18323	0	0.87223	0.016714	0.054065	0.651546	1586	4	0.87223	-1.77692
SLC35B2	4	0.73376	0.74881	1	13681	1	0.97834	0.016732	0.054114	0.651722	1587	3	0.97834	-1.77645
NAA35	4	0.98142	0.98151	1	18268	0	1.0536	0.016777	0.054252	0.652976	1588	4	1.0536	-1.77529
HHLA2	4	0.90821	0.90817	1	16742	0	0.70037	0.016807	0.05434	0.653319	1589	3	0.70037	-1.77451
NBPF11	4	0.43815	0.58525	1	10727	1	0.98241	0.01681	0.054349	0.653319	1590	3	0.98241	-1.77443
EPX	4	0.98316	0.98327	1	18321	0	0.23661	0.016838	0.05444	0.653997	1591	4	0.23661	-1.77371
INTS6	4	0.35725	0.50201	1	9264	2	0.29344	0.016911	0.054671	0.65636	1592	2	0.29344	-1.77183
CHRNA5	4	0.98305	0.98316	1	18320	0	0.28757	0.016947	0.054774	0.65681	1593	4	0.28757	-1.77091
PPP1R7	4	0.85877	0.85894	1	15769	0	0.94435	0.016948	0.054777	0.65681	1594	3	0.94435	-1.77088
FAM155A	4	0.98302	0.98312	1	18319	0	0.40493	0.016984	0.054881	0.657488	1595	4	0.40493	-1.76996
OAZ2	4	0.98301	0.98312	1	18318	0	0.24893	0.01699	0.054903	0.657488	1596	4	0.24893	-1.76981
TBC1D10B	4	0.95737	0.95745	1	17719	0	0.78258	0.017074	0.055146	0.659991	1597	3	0.78258	-1.76766
BCAT2	4	0.98291	0.98302	1	18317	0	0.23222	0.017091	0.055198	0.660197	1598	4	0.23222	-1.76723
TM9SF3	4	0.84496	0.84503	1	15484	0	0.69449	0.017131	0.05532	0.660828	1599	3	0.69449	-1.76622
NTF4	4	0.94112	0.94111	1	17427	0	0.74495	0.017141	0.055351	0.660828	1600	3	0.74495	-1.76596
CENPE	4	0.98286	0.98296	1	18316	0	0.42134	0.017142	0.055354	0.660828	1601	4	0.42134	-1.76594
SYT1	4	0.98282	0.98292	1	18315	0	0.5504	0.017177	0.055454	0.661468	1602	4	0.5504	-1.76505
TMSB15A	4	0.93454	0.93448	1	17273	0	0.67468	0.017189	0.055496	0.661468	1603	3	0.67468	-1.76475
UHRF1BP1	4	0.9828	0.9829	1	18314	0	0.51407	0.017195	0.055512	0.661468	1604	4	0.51407	-1.7646
GAL	4	0.98273	0.98283	1	18313	0	0.81574	0.017265	0.05571	0.66324	1605	4	0.81574	-1.76283
GTF2B	4	0.98273	0.98283	1	18312	0	0.65856	0.017274	0.055737	0.66324	1606	4	0.65856	-1.76261
HIST2H2AC	4	0.98272	0.98281	1	18311	0	0.90539	0.017284	0.055764	0.66324	1607	4	0.90539	-1.76236
LOC645382	4	0.98269	0.98278	1	18310	0	0.65171	0.017312	0.055843	0.663283	1608	4	0.65171	-1.76165
AES	4	0.97854	0.97869	1	18193	0	0.70144	0.017327	0.055895	0.663283	1609	3	0.70144	-1.76128
METTL13	4	0.98267	0.98277	1	18309	0	0.51097	0.01733	0.055901	0.663283	1610	4	0.51097	-1.7612
YEATS4	4	0.9575	0.95758	1	17724	0	0.85416	0.017331	0.055907	0.663283	1611	3	0.85416	-1.76118
HBS1L	4	0.98264	0.98274	1	18308	0	0.39252	0.017359	0.055996	0.663928	1612	4	0.39252	-1.76048
UGT2B10	4	0.98262	0.98272	1	18307	0	0.58857	0.017381	0.056062	0.664234	1613	4	0.58857	-1.75993
TRPM4	4	0.9826	0.98271	1	18306	0	0.22645	0.017397	0.056101	0.664234	1614	4	0.22645	-1.75953
SETD1A	4	0.69627	0.72306	1	13215	1	1.3123	0.017404	0.056126	0.664234	1615	3	1.3123	-1.75935
G6PC	4	0.81252	0.81313	1	14875	1	0.69365	0.017429	0.056204	0.664386	1616	3	0.69365	-1.75873
MCCC2	4	0.98257	0.98267	1	18304	0	0.42372	0.017431	0.056208	0.664386	1617	4	0.42372	-1.75868
MIPEP	4	0.98254	0.98265	1	18303	0	0.76509	0.017456	0.05628	0.664826	1618	4	0.76509	-1.75806
SAP130	4	0.98251	0.98261	1	18300	0	0.27742	0.017488	0.05637	0.665209	1619	4	0.27742	-1.75726
UFSP2	4	0.98251	0.98261	1	18299	0	0.28999	0.017492	0.056382	0.665209	1620	4	0.28999	-1.75716
AATF	4	0.98248	0.98257	1	18298	0	0.73208	0.017522	0.056483	0.665895	1621	4	0.73208	-1.75642
AKNAD1	4	0.98246	0.98256	1	18297	0	0.58679	0.017538	0.056535	0.665895	1622	4	0.58679	-1.75602
NAV2	4	0.93105	0.93097	1	17204	0	0.59038	0.017541	0.056545	0.665895	1623	3	0.59038	-1.75595
MRPS6	4	0.62194	0.67846	1	12427	1	0.93803	0.017587	0.056688	0.666702	1624	3	0.93803	-1.75481
STIM1	4	0.9824	0.9825	1	18295	0	0.67405	0.017598	0.056723	0.666702	1625	4	0.67405	-1.75454
ENY2	4	0.39084	0.53634	1	9879	2	0.51275	0.017602	0.056732	0.666702	1626	2	0.51275	-1.75444
MAG	4	0.98147	0.98156	1	18270	0	0.85101	0.017613	0.056764	0.666702	1627	4	0.85101	-1.75417
DUSP11	4	0.38149	0.52681	1	9703	1	0.86308	0.017625	0.056792	0.666702	1628	3	0.86308	-1.75387
GNL2	4	0.97393	0.97407	1	18089	0	0.92174	0.017648	0.056859	0.666702	1629	2	0.92174	-1.7533
B3GNT2	4	0.55208	0.64232	1	11762	1	1.0653	0.017666	0.056919	0.666702	1630	3	1.0653	-1.75286
CD2BP2	4	0.98232	0.98241	1	18293	0	0.57232	0.017683	0.056968	0.666702	1631	4	0.57232	-1.75244
SPDYE2B	4	0.90508	0.90503	1	16674	0	1.2056	0.017701	0.057031	0.666702	1632	3	1.2056	-1.752
BHLHA9	4	0.0020903	0.0075473	0.806746	174	1	0.018349	0.017701	0.057031	0.666702	1633	1	0.018349	-1.752
BTF3	4	0.97561	0.97577	1	18121	0	0.56339	0.017715	0.057065	0.666702	1634	3	0.56339	-1.75166
PRDX3	4	0.54089	0.63695	1	11658	1	0.82033	0.017727	0.057094	0.666702	1635	3	0.82033	-1.75136
PDHA1	4	0.98227	0.98237	1	18292	0	0.5822	0.017728	0.057094	0.666702	1636	4	0.5822	-1.75134
CDK18	4	0.80264	0.80405	1	14685	1	0.81539	0.017731	0.057102	0.666702	1637	3	0.81539	-1.75127
TRIP12	4	0.34553	0.49009	1	9043	1	0.59857	0.017772	0.057213	0.667362	1638	3	0.59857	-1.75026
AASDHPPT	4	0.98222	0.98231	1	18291	0	0.678	0.017777	0.057228	0.667362	1639	4	0.678	-1.75014
RBM15	4	0.84758	0.84769	1	15540	0	0.76374	0.017828	0.057386	0.668413	1640	3	0.76374	-1.7489
NCKAP1	4	0.85451	0.85461	1	15682	0	0.9347	0.017829	0.057388	0.668413	1641	3	0.9347	-1.74887
C3orf17	4	0.92334	0.9234	1	17054	0	0.83787	0.017875	0.057503	0.669175	1642	3	0.83787	-1.74775
CHMP6	4	0.50679	0.62116	1	11375	1	0.85505	0.017887	0.057531	0.669175	1643	3	0.85505	-1.74746
ANTXRL	4	0.98211	0.98219	1	18288	0	0.57187	0.017894	0.057559	0.669175	1644	4	0.57187	-1.74729
TM9SF2	4	0.069569	0.15918	0.962729	3155	1	0.55023	0.017953	0.057734	0.670797	1645	2	0.55023	-1.74586
RPS18	4	0.98201	0.98209	1	18286	0	1.1832	0.017993	0.057856	0.671815	1646	4	1.1832	-1.7449
ACTR10	4	0.93754	0.9375	1	17339	0	0.96711	0.018042	0.057998	0.673054	1647	3	0.96711	-1.74372
DNAJC7	4	0.98188	0.98196	1	18283	0	0.43012	0.018117	0.05822	0.674694	1648	4	0.43012	-1.74191
ZNF510	4	0.98186	0.98195	1	18282	0	0.46592	0.018138	0.058279	0.674694	1649	4	0.46592	-1.74141
RYR1	4	0.30946	0.45333	1	8394	2	0.40639	0.018141	0.05829	0.674694	1650	2	0.40639	-1.74134
PPAN-P2RY11	4	0.89561	0.89563	1	16510	0	0.75618	0.018147	0.058306	0.674694	1651	3	0.75618	-1.7412
C21orf2	4	0.81856	0.81886	1	14992	1	0.77245	0.018173	0.058375	0.674694	1652	3	0.77245	-1.74057
NRF1	4	0.85722	0.85739	1	15740	0	0.71117	0.018184	0.058406	0.674694	1653	3	0.71117	-1.74031
MST1	4	0.98182	0.9819	1	18281	0	0.66972	0.018185	0.05841	0.674694	1654	4	0.66972	-1.74029
RGN	4	0.97586	0.97602	1	18129	0	0.63671	0.01819	0.058422	0.674694	1655	3	0.63671	-1.74017
C8orf4	4	0.98177	0.98187	1	18280	0	0.5276	0.018227	0.05853	0.675475	1656	4	0.5276	-1.73928
IST1	4	0.085225	0.18826	0.97262	3689	2	0.10037	0.018236	0.05856	0.675475	1657	2	0.10037	-1.73907
CXCL10	4	0.83504	0.83517	1	15282	0	0.75332	0.018248	0.058599	0.67551	1658	3	0.75332	-1.73878
PET100	4	0.44972	0.59643	1	10931	1	0.65677	0.018263	0.058641	0.675586	1659	3	0.65677	-1.73843
ZNF165	4	0.59974	0.6663	1	12210	1	0.93586	0.018339	0.058863	0.677119	1660	3	0.93586	-1.73662
METTL12	4	0.55869	0.64552	1	11827	1	0.67471	0.018343	0.058877	0.677119	1661	2	0.67471	-1.73653
CYP4F12	4	0.96306	0.96314	1	17854	0	0.70248	0.018345	0.05888	0.677119	1662	3	0.70248	-1.73648
DCAF6	4	0.98162	0.98172	1	18278	0	0.22294	0.018379	0.058981	0.677317	1663	4	0.22294	-1.73568
TXLNA	4	0.54568	0.63927	1	11700	1	0.78282	0.018381	0.058988	0.677317	1664	3	0.78282	-1.73563
GNAI3	4	0.9816	0.9817	1	18277	0	0.47026	0.018396	0.059031	0.677317	1665	4	0.47026	-1.73528
RPS29	4	0.60669	0.67006	1	12270	1	1.0606	0.018398	0.059039	0.677317	1666	3	1.0606	-1.73523
HMCN2	4	0.98155	0.98165	1	18275	0	0.4102	0.018447	0.059184	0.678393	1667	4	0.4102	-1.73407
PHF21A	4	0.80953	0.8104	1	14821	1	0.95136	0.018453	0.059204	0.678393	1668	3	0.95136	-1.73393
SEC16B	4	0.98152	0.98161	1	18272	0	0.23745	0.018482	0.059279	0.678847	1669	4	0.23745	-1.73325
KREMEN2	4	0.9815	0.98159	1	18271	0	0.68906	0.018502	0.059337	0.67911	1670	4	0.68906	-1.73278
VPS11	4	0.79158	0.79425	1	14508	1	0.77154	0.018553	0.059489	0.680123	1671	3	0.77154	-1.73159
SAMHD1	4	0.20791	0.34922	1	6572	1	0.62223	0.018561	0.059516	0.680123	1672	3	0.62223	-1.7314
PEX10	4	0.98143	0.98153	1	18269	0	0.51853	0.018566	0.059533	0.680123	1673	4	0.51853	-1.73128
HHLA1	4	0.98135	0.98144	1	18267	0	0.22778	0.018654	0.059785	0.68222	1674	4	0.22778	-1.72923
SPPL2B	4	0.089181	0.19551	0.974767	3819	2	0.48483	0.01866	0.059805	0.68222	1675	2	0.48483	-1.72909
NDC1	4	0.98133	0.98143	1	18266	0	0.33511	0.018667	0.059823	0.68222	1676	4	0.33511	-1.72893
TEX43	4	0.89462	0.89462	1	16497	0	0.77839	0.018684	0.059874	0.682392	1677	3	0.77839	-1.72853
MLLT11	4	0.90463	0.9046	1	16670	0	0.92296	0.018712	0.059956	0.682918	1678	3	0.92296	-1.72788
HACD2	4	0.98125	0.98134	1	18265	0	0.89295	0.018753	0.060085	0.683778	1679	4	0.89295	-1.72693
TSPAN32	4	0.94451	0.94454	1	17485	0	0.53998	0.018759	0.060103	0.683778	1680	3	0.53998	-1.72679
OTUD5	4	0.97062	0.97074	1	18021	0	0.90961	0.0188	0.060227	0.684779	1681	3	0.90961	-1.72584
DAXX	4	0.98109	0.98119	1	18262	0	0.96099	0.018856	0.060383	0.685742	1682	4	0.96099	-1.72455
DLST	4	0.91583	0.91578	1	16890	0	0.99191	0.018857	0.060383	0.685742	1683	3	0.99191	-1.72453
RAD9B	4	0.57468	0.6535	1	11967	1	0.66635	0.018924	0.060603	0.68759	1684	3	0.66635	-1.72299
EXOC6B	4	0.98107	0.98117	1	18261	0	0.35912	0.018929	0.060618	0.68759	1685	4	0.35912	-1.72287
LARP4	4	0.98105	0.98115	1	18260	0	0.32201	0.018953	0.060699	0.688098	1686	4	0.32201	-1.72232
C20orf196	4	0.98102	0.98113	1	18259	0	0.74143	0.01898	0.060788	0.688706	1687	4	0.74143	-1.7217
SLC6A11	4	0.98094	0.98104	1	18258	0	0.49122	0.01906	0.061031	0.691043	1688	4	0.49122	-1.71988
OR10H5	4	0.0014197	0.0051593	0.76441	129	2	0.45423	0.019122	0.061167	0.691901	1689	2	0.45423	-1.71847
HSPA14	4	0.73948	0.75299	1	13748	1	0.74461	0.01913	0.061179	0.691901	1690	2	0.74461	-1.71829
DPY30	4	0.43533	0.58236	1	10666	1	0.47449	0.019153	0.061232	0.692094	1691	2	0.47449	-1.71776
SMAP2	4	0.92828	0.92824	1	17146	0	0.34787	0.019204	0.061353	0.693049	1692	2	0.34787	-1.71661
RMI1	4	0.75422	0.76395	1	13958	1	0.83945	0.019223	0.061399	0.693101	1693	3	0.83945	-1.71618
EIF3L	4	0.87643	0.87648	1	16127	0	0.72602	0.019252	0.061462	0.693101	1694	3	0.72602	-1.71552
PKN2	4	0.68511	0.71586	1	13078	1	0.40223	0.019255	0.061466	0.693101	1695	2	0.40223	-1.71546
RBM33	4	0.22686	0.36858	1	6930	1	0.8316	0.019318	0.061607	0.694281	1696	3	0.8316	-1.71404
COASY	4	0.96374	0.96381	1	17867	0	0.51015	0.019357	0.061691	0.694817	1697	3	0.51015	-1.71316
POLG	4	0.80172	0.80324	1	14676	1	0.71829	0.019427	0.061836	0.69604	1698	3	0.71829	-1.71159
MRPL22	4	0.28965	0.43304	1	8053	1	0.85536	0.019479	0.061961	0.696724	1699	3	0.85536	-1.71043
NPIPA1	4	0.90605	0.90601	1	16697	0	0.34323	0.019484	0.06197	0.696724	1700	2	0.34323	-1.71032
RBM14-RBM4	4	0.97577	0.97593	1	18124	0	0.81216	0.019509	0.062019	0.696861	1701	3	0.81216	-1.70976
CCNE1	4	0.91896	0.91897	1	16964	0	0.58173	0.019633	0.062265	0.699221	1702	3	0.58173	-1.70701
PPIL2	4	0.86955	0.8696	1	15969	0	0.97296	0.019662	0.062313	0.699345	1703	3	0.97296	-1.70637
TMEM183B	4	0.97115	0.97127	1	18030	0	0.64279	0.01969	0.062375	0.699632	1704	2	0.64279	-1.70575
CCDC22	4	0.61433	0.67423	1	12344	1	0.62858	0.01975	0.062499	0.700616	1705	3	0.62858	-1.70443
RPS20	4	0.90967	0.90962	1	16764	0	1.277	0.019807	0.062606	0.701395	1706	3	1.277	-1.70318
PEX6	4	0.67021	0.7066	1	12914	1	0.64653	0.019876	0.062756	0.702672	1707	3	0.64653	-1.70167
YTHDF2	4	0.42062	0.56722	1	10414	1	0.73885	0.019907	0.062826	0.703037	1708	3	0.73885	-1.70099
RANGAP1	4	0.12492	0.25861	0.986175	4992	2	0.28397	0.019967	0.062939	0.703889	1709	2	0.28397	-1.69969
RUVBL2	4	0.958	0.95804	1	17735	0	1.0743	0.020002	0.063004	0.704188	1710	3	1.0743	-1.69893
CRCP	4	0.30552	0.4493	1	8324	2	-0.2879	0.020018	0.063039	0.704188	1711	1	-0.2879	-1.69858
COX10	4	0.71073	0.73274	1	13403	1	0.44452	0.020069	0.063158	0.705107	1712	3	0.44452	-1.69747
INPP5E	4	0.12733	0.26276	0.986175	5064	1	0.73497	0.02015	0.063318	0.706482	1713	2	0.73497	-1.69572
C6orf226	4	0.33216	0.47647	1	8807	1	0.66174	0.020204	0.063423	0.707169	1714	2	0.66174	-1.69456
NSF	4	0.39347	0.5391	1	9931	1	0.39677	0.020222	0.063464	0.707169	1715	2	0.39677	-1.69418
ABCC9	4	0.1999	0.34112	1	6409	1	0.59143	0.020239	0.063502	0.707169	1716	3	0.59143	-1.69381
CEP97	4	0.86337	0.86348	1	15863	0	0.82687	0.020258	0.063544	0.707169	1717	3	0.82687	-1.6934
WDR1	4	0.94428	0.94432	1	17479	0	1.1352	0.020266	0.063565	0.707169	1718	3	1.1352	-1.69323
PPCDC	4	0.36471	0.50958	1	9395	1	0.96347	0.020328	0.063687	0.708117	1719	3	0.96347	-1.69191
NDUFB6	4	0.87894	0.87898	1	16178	0	0.90236	0.020363	0.063768	0.708609	1720	3	0.90236	-1.69116
WNK1	4	0.64946	0.69418	1	12685	1	0.85047	0.02044	0.063933	0.709608	1721	3	0.85047	-1.68952
POLR3C	4	0.97371	0.97384	1	18084	0	1.3228	0.020476	0.064007	0.710024	1722	3	1.3228	-1.68875
IPMK	4	0.9774	0.97754	1	18156	0	0.74517	0.020523	0.064093	0.710412	1723	3	0.74517	-1.68776
S100A12	4	0.093795	0.20386	0.976267	3990	1	0.71489	0.020544	0.064136	0.710412	1724	3	0.71489	-1.68731
MSTO1	4	0.80555	0.80667	1	14735	1	0.84805	0.020566	0.064183	0.710412	1725	3	0.84805	-1.68685
QDPR	4	0.95666	0.95671	1	17701	0	0.96444	0.020586	0.064225	0.710412	1726	3	0.96444	-1.68643
NPLOC4	4	0.38028	0.52559	1	9683	2	0.69031	0.020598	0.064256	0.710412	1727	2	0.69031	-1.68617
GALNT2	4	0.17568	0.31624	1	5966	1	0.69559	0.020602	0.064265	0.710412	1728	3	0.69559	-1.68609
NCOR2	4	0.93833	0.9383	1	17366	0	0.7767	0.020652	0.064351	0.710951	1729	3	0.7767	-1.68504
ZFP62	4	0.6078	0.67066	1	12280	1	0.54475	0.020707	0.064464	0.711668	1730	2	0.54475	-1.68388
WAPAL	4	0.93923	0.93921	1	17389	0	0.87039	0.020719	0.064491	0.711668	1731	3	0.87039	-1.68363
ANAPC1	4	0.44605	0.59338	1	10881	1	0.56904	0.020781	0.064615	0.712332	1732	3	0.56904	-1.68233
PRDM11	4	0.76916	0.77557	1	14166	1	0.8619	0.020786	0.064625	0.712332	1733	3	0.8619	-1.68223
RABGGTB	4	0.90821	0.90817	1	16741	0	0.85059	0.020816	0.06469	0.712435	1734	3	0.85059	-1.6816
GPBAR1	4	0.91305	0.91299	1	16837	0	0.61888	0.020824	0.064709	0.712435	1735	2	0.61888	-1.68144
INPP5F	4	0.88684	0.8869	1	16342	0	0.86504	0.02084	0.064748	0.712452	1736	3	0.86504	-1.6811
DSCC1	4	0.94359	0.94364	1	17471	0	1.1053	0.020866	0.064796	0.712572	1737	3	1.1053	-1.68056
SLC25A46	4	0.761	0.76913	1	14057	1	0.4625	0.020908	0.064862	0.712886	1738	3	0.4625	-1.67969
REPS2	4	0.72506	0.74259	1	13559	1	0.55774	0.020929	0.064912	0.713022	1739	2	0.55774	-1.67925
TP53TG3D	4	0.92764	0.92761	1	17134	0	0.50867	0.020984	0.065024	0.713465	1740	3	0.50867	-1.67811
APOA1BP	4	0.66603	0.70402	1	12868	1	0.53879	0.020988	0.065027	0.713465	1741	3	0.53879	-1.67803
DIABLO	4	0.64213	0.68989	1	12607	1	0.66435	0.021043	0.065156	0.713932	1742	3	0.66435	-1.67689
FDX1	4	0.30324	0.44702	1	8284	1	1.0045	0.021093	0.06525	0.713932	1743	3	1.0045	-1.67586
HYOU1	4	0.73755	0.75157	1	13723	1	1.0652	0.021102	0.06527	0.713932	1744	3	1.0652	-1.67568
MRPL34	4	0.16416	0.30439	1	5781	1	0.83601	0.02111	0.065289	0.713932	1745	3	0.83601	-1.67551
MEIOB	4	0.66827	0.70536	1	12893	1	0.47367	0.021119	0.065303	0.713932	1746	3	0.47367	-1.67533
GTF2H2C	4	0.96926	0.96934	1	17988	0	0.80247	0.021137	0.065341	0.713932	1747	3	0.80247	-1.67496
ATF6	4	0.81768	0.81802	1	14979	1	0.60425	0.021144	0.065358	0.713932	1748	3	0.60425	-1.67481
KRT18	4	0.73814	0.75201	1	13732	1	1.3477	0.021149	0.065368	0.713932	1749	3	1.3477	-1.67471
MCRS1	4	0.89306	0.89307	1	16462	0	0.94446	0.021238	0.065551	0.71552	1750	3	0.94446	-1.67289
HS6ST1	4	0.34384	0.48833	1	9017	1	0.73435	0.02127	0.065624	0.715879	1751	3	0.73435	-1.67223
PDE12	4	0.92356	0.92361	1	17061	0	0.62533	0.021289	0.065659	0.715879	1752	3	0.62533	-1.67184
SSNA1	4	0.8764	0.87645	1	16125	0	0.65368	0.021333	0.065745	0.716413	1753	3	0.65368	-1.67095
HDC	4	0.46053	0.601	1	11016	1	0.64456	0.021397	0.065876	0.717433	1754	3	0.64456	-1.66965
EED	4	0.53245	0.63296	1	11586	1	0.28981	0.021442	0.065979	0.717934	1755	2	0.28981	-1.66873
VEZT	4	0.37793	0.52315	1	9637	1	0.29904	0.021493	0.066093	0.717934	1756	2	0.29904	-1.6677
RAD17	4	0.38696	0.53241	1	9810	1	0.43995	0.021496	0.066101	0.717934	1757	2	0.43995	-1.66764
DAG1	4	0.41262	0.55891	1	10269	1	0.60329	0.021498	0.066105	0.717934	1758	3	0.60329	-1.6676
CTDNEP1	4	0.7282	0.7449	1	13604	1	0.79742	0.021508	0.066124	0.717934	1759	3	0.79742	-1.6674
MRPS18C	4	0.77525	0.78052	1	14250	1	0.95396	0.021519	0.066148	0.717934	1760	3	0.95396	-1.66718
ZKSCAN2	4	0.76975	0.77605	1	14176	1	0.47034	0.021585	0.066286	0.719021	1761	2	0.47034	-1.66585
COX7B	4	0.82552	0.82565	1	15096	1	0.53443	0.021615	0.066349	0.719299	1762	2	0.53443	-1.66524
INIP	4	0.84072	0.84087	1	15397	0	0.80102	0.021679	0.066484	0.720356	1763	2	0.80102	-1.66396
MRPL51	4	0.95209	0.95222	1	17615	0	0.44616	0.021747	0.066624	0.721462	1764	2	0.44616	-1.6626
TRNT1	4	0.70025	0.72569	1	13267	1	-0.07272	0.021798	0.066725	0.721996	1765	1	-0.07272	-1.66158
FRS3	4	0.75521	0.76469	1	13962	1	0.78027	0.021807	0.066749	0.721996	1766	2	0.78027	-1.6614
TAF7L	4	0.72812	0.74485	1	13602	1	0.93406	0.021832	0.066796	0.722103	1767	3	0.93406	-1.66091
EGFL6	4	0.061715	0.1442	0.951666	2895	1	0.62487	0.021867	0.066864	0.722221	1768	2	0.62487	-1.66021
MED7	4	0.49431	0.61559	1	11277	1	0.86314	0.021876	0.066883	0.722221	1769	2	0.86314	-1.66003
TAF11	4	0.67613	0.7102	1	12977	1	0.59007	0.021938	0.06702	0.723261	1770	3	0.59007	-1.6588
IGFBP4	4	0.13513	0.27454	0.988176	5311	2	-0.15668	0.021975	0.067093	0.723261	1771	2	-0.15668	-1.65807
PRPF31	4	0.58335	0.65783	1	12051	1	0.086766	0.021975	0.067093	0.723261	1772	1	0.086766	-1.65807
RBM26	4	0.92037	0.92037	1	16997	0	0.86964	0.022025	0.067199	0.724003	1773	3	0.86964	-1.65708
TDP2	4	0.96251	0.96261	1	17841	0	0.73855	0.022168	0.067477	0.726585	1774	2	0.73855	-1.65427
SDE2	4	0.56855	0.6504	1	11916	1	1.1187	0.022202	0.067542	0.726878	1775	3	1.1187	-1.65361
ESF1	4	0.51819	0.62637	1	11472	1	1.1101	0.022323	0.06779	0.728752	1776	3	1.1101	-1.65125
EIF3M	4	0.87728	0.87731	1	16144	0	0.63393	0.022332	0.067813	0.728752	1777	2	0.63393	-1.65107
BRK1	4	0.69262	0.72063	1	13171	1	0.64862	0.022341	0.067831	0.728752	1778	2	0.64862	-1.6509
OR4F29	4	0.72861	0.74519	1	13610	1	-0.27452	0.022407	0.067952	0.729645	1779	2	-0.27452	-1.64962
RRS1	4	0.90508	0.90503	1	16675	0	0.88247	0.022527	0.068206	0.73161	1780	3	0.88247	-1.6473
FGD2	4	0.035041	0.091881	0.919616	1897	1	0.51743	0.022533	0.068213	0.73161	1781	3	0.51743	-1.64718
OPRL1	4	0.40573	0.55181	1	10137	1	0.72666	0.022549	0.06825	0.73161	1782	2	0.72666	-1.64687
WDR24	4	0.97307	0.97322	1	18074	0	0.70461	0.02261	0.068385	0.732648	1783	3	0.70461	-1.6457
LARP1	4	0.72822	0.74491	1	13605	1	0.66197	0.022732	0.068639	0.734627	1784	3	0.66197	-1.64336
SYNPO2L	4	0.64653	0.69243	1	12657	1	0.69494	0.022736	0.068647	0.734627	1785	3	0.69494	-1.64329
ABHD11	4	0.92247	0.92254	1	17033	0	0.68246	0.022865	0.068913	0.736622	1786	3	0.68246	-1.64083
YBEY	4	0.85802	0.85819	1	15757	0	0.67023	0.022872	0.068926	0.736622	1787	3	0.67023	-1.6407
DNAJC30	4	0.049791	0.12103	0.93765	2466	1	0.58906	0.022883	0.068949	0.736622	1788	3	0.58906	-1.64049
VCPIP1	4	0.48691	0.61235	1	11217	1	0.83839	0.022923	0.069023	0.737007	1789	3	0.83839	-1.63973
NEK7	4	0.50344	0.6197	1	11347	1	0.028892	0.022966	0.069107	0.737491	1790	1	0.028892	-1.63891
TEN1	4	0.96575	0.96587	1	17910	0	0.65139	0.023066	0.069318	0.739323	1791	3	0.65139	-1.63703
TARBP2	4	0.11802	0.24667	0.986175	4760	1	0.58768	0.023218	0.069651	0.742439	1792	3	0.58768	-1.63418
RRP7A	4	0.96194	0.96202	1	17832	0	0.93668	0.023234	0.069687	0.742439	1793	3	0.93668	-1.63388
OR9G4	4	0.24141	0.38346	1	7175	1	0.61278	0.023293	0.069813	0.74336	1794	2	0.61278	-1.63277
UGT2B28	4	0.24271	0.38477	1	7203	1	0.63875	0.023308	0.069852	0.74336	1795	3	0.63875	-1.63249
CMC1	4	0.74528	0.7573	1	13834	1	0.68122	0.023421	0.070071	0.745277	1796	3	0.68122	-1.63039
USP47	4	0.87994	0.87997	1	16201	0	0.90313	0.023461	0.07016	0.745291	1797	3	0.90313	-1.62965
NDUFB3	4	0.15562	0.29563	1	5652	1	0.77581	0.023484	0.070201	0.745291	1798	3	0.77581	-1.62923
WSB2	4	0.96772	0.96781	1	17961	0	0.72706	0.023498	0.070226	0.745291	1799	3	0.72706	-1.62897
ANKRD20A1	4	0.13842	0.27795	0.990518	5364	2	0.36136	0.023514	0.070264	0.745291	1800	2	0.36136	-1.62867
RFWD3	4	0.77818	0.78295	1	14298	1	0.863	0.023516	0.070267	0.745291	1801	3	0.863	-1.62864
ZNF277	4	0.051827	0.12503	0.939388	2527	1	0.62728	0.023548	0.070345	0.745428	1802	3	0.62728	-1.62805
TXNL4B	4	0.84058	0.84072	1	15393	0	0.30253	0.023575	0.070397	0.745428	1803	2	0.30253	-1.62755
SLC35A1	4	0.97147	0.9716	1	18035	0	0.82725	0.023582	0.070405	0.745428	1804	3	0.82725	-1.62742
APOA1	4	0.50301	0.61951	1	11345	1	0.96801	0.023598	0.070436	0.745428	1805	3	0.96801	-1.62712
MMRN2	4	0.95554	0.95559	1	17679	0	0.99412	0.023625	0.070498	0.745673	1806	3	0.99412	-1.62663
RAPH1	4	0.57139	0.65184	1	11938	1	0.60223	0.023684	0.070608	0.74637	1807	3	0.60223	-1.62554
ZNF785	4	0.63539	0.68601	1	12546	1	0.54489	0.023701	0.070642	0.74637	1808	2	0.54489	-1.62523
PPM1D	4	0.90659	0.90657	1	16709	0	0.57161	0.023848	0.070925	0.748937	1809	3	0.57161	-1.62255
NDUFB7	4	0.34865	0.49324	1	9100	1	0.65909	0.02388	0.070998	0.748937	1810	3	0.65909	-1.62197
PSORS1C1	4	0.91486	0.91481	1	16872	0	0.56185	0.023885	0.071003	0.748937	1811	3	0.56185	-1.62187
BCOR	4	0.79529	0.79745	1	14561	1	0.8509	0.023974	0.071185	0.750446	1812	3	0.8509	-1.62026
APC	4	0.9395	0.93949	1	17396	0	0.8855	0.023999	0.071231	0.750513	1813	3	0.8855	-1.61981
UBE3A	4	0.97038	0.9705	1	18012	0	0.85455	0.024068	0.071372	0.75119	1814	3	0.85455	-1.61856
GK5	4	0.85075	0.85085	1	15600	0	0.60417	0.024109	0.071455	0.75119	1815	3	0.60417	-1.61782
IBA57	4	0.66742	0.70484	1	12884	1	0.23453	0.024133	0.071509	0.75119	1816	2	0.23453	-1.61739
PPP1R14A	4	0.88978	0.88981	1	16391	0	0.52023	0.024156	0.071553	0.75119	1817	2	0.52023	-1.61697
RAD51C	4	0.92772	0.92769	1	17136	0	0.72751	0.024165	0.071576	0.75119	1818	3	0.72751	-1.61681
VPS18	4	0.95633	0.95636	1	17693	0	0.65184	0.024169	0.071586	0.75119	1819	3	0.65184	-1.61674
UST	4	0.66184	0.7015	1	12822	1	0.65804	0.024183	0.071608	0.75119	1820	2	0.65804	-1.61649
POP1	4	0.87022	0.87026	1	15982	0	0.67519	0.024183	0.071609	0.75119	1821	3	0.67519	-1.61649
PPP2R5D	4	0.96526	0.96536	1	17901	0	1.0679	0.024205	0.071652	0.751223	1822	3	1.0679	-1.61609
SUOX	4	0.86499	0.86509	1	15893	0	0.7334	0.024271	0.07179	0.752261	1823	3	0.7334	-1.61491
RPL23A	4	0.95094	0.95107	1	17598	0	0.92913	0.024317	0.071895	0.75295	1824	2	0.92913	-1.61409
UBAP2	4	0.81487	0.81534	1	14928	1	0.89264	0.024435	0.07214	0.75439	1825	3	0.89264	-1.61199
SRSF3	4	0.52517	0.6296	1	11528	1	1.6745	0.024439	0.072151	0.75439	1826	3	1.6745	-1.61192
RPL4	4	0.24386	0.38593	1	7231	2	0.68898	0.024439	0.072151	0.75439	1827	2	0.68898	-1.61192
LMAN1L	4	0.75817	0.76697	1	14016	1	0.70682	0.024456	0.072192	0.754405	1828	3	0.70682	-1.61161
TAF7	4	0.59045	0.66145	1	12115	1	0.82233	0.024489	0.07225	0.754593	1829	3	0.82233	-1.61103
GPHB5	4	0.95275	0.95287	1	17626	0	0.72537	0.02453	0.07235	0.755225	1830	3	0.72537	-1.6103
SNAPC5	4	0.65007	0.69453	1	12694	1	0.73281	0.024589	0.072472	0.756088	1831	3	0.73281	-1.60926
VSTM2A	4	0.73842	0.75221	1	13737	1	0.81207	0.024624	0.072548	0.756475	1832	2	0.81207	-1.60864
BRIP1	4	0.55044	0.64154	1	11746	1	0.70016	0.024687	0.072676	0.757145	1833	3	0.70016	-1.60753
STOML1	4	0.75089	0.76147	1	13907	1	0.68717	0.024696	0.072692	0.757145	1834	3	0.68717	-1.60737
FERMT2	4	0.75728	0.76629	1	14001	1	0.6756	0.024715	0.072738	0.757207	1835	3	0.6756	-1.60704
CRABP2	4	0.81491	0.81538	1	14929	1	0.92295	0.024737	0.072778	0.757216	1836	3	0.92295	-1.60665
DIS3L	4	0.97842	0.97857	1	18186	0	1.0397	0.024778	0.072861	0.75734	1837	3	1.0397	-1.60593
SELV	4	0.57412	0.65322	1	11958	1	0.50235	0.024782	0.072869	0.75734	1838	3	0.50235	-1.60586
LRRC16B	4	0.33045	0.47472	1	8771	1	0.62158	0.024806	0.072919	0.75745	1839	3	0.62158	-1.60544
CBWD5	4	0.95751	0.95759	1	17725	0	1.0223	0.024842	0.072983	0.7577	1840	3	1.0223	-1.60481
CCDC115	4	0.40445	0.55044	1	10115	2	0.59446	0.024923	0.073163	0.759154	1841	2	0.59446	-1.6034
ST7L	4	0.74415	0.75646	1	13812	1	0.42944	0.025045	0.073407	0.760983	1842	3	0.42944	-1.60128
ZC3H13	4	0.92268	0.92274	1	17039	0	0.85608	0.025051	0.073419	0.760983	1843	3	0.85608	-1.60117
EPG5	4	0.98033	0.98047	1	18242	0	0.53026	0.025097	0.073521	0.761628	1844	3	0.53026	-1.60038
LENG1	4	0.79897	0.80076	1	14632	1	0.66089	0.025118	0.073565	0.761671	1845	3	0.66089	-1.60001
USP17L30	4	0.82818	0.82831	1	15138	1	0.65026	0.025142	0.073611	0.761736	1846	2	0.65026	-1.5996
TNPO3	4	0.5624	0.64735	1	11859	1	0.32415	0.025222	0.073776	0.763033	1847	2	0.32415	-1.59822
MRPL36	4	0.22405	0.36572	1	6873	1	0.65177	0.025366	0.074091	0.765631	1848	2	0.65177	-1.59575
ANXA8	4	0.58421	0.65828	1	12056	1	0.71091	0.025398	0.074163	0.765631	1849	3	0.71091	-1.5952
MRPL42	4	0.45099	0.59693	1	10942	1	0.77783	0.025426	0.074218	0.765631	1850	2	0.77783	-1.59472
ZNF688	4	0.12509	0.2589	0.986175	4996	1	0.50818	0.025433	0.074236	0.765631	1851	3	0.50818	-1.5946
MASTL	4	0.96055	0.96063	1	17791	0	0.46643	0.02545	0.074268	0.765631	1852	3	0.46643	-1.59431
NCBP2	4	0.28868	0.43201	1	8037	2	-0.31158	0.02545	0.074268	0.765631	1853	1	-0.31158	-1.59431
IRF2BP1	4	0.2356	0.37758	1	7075	1	0.75212	0.025472	0.074319	0.765747	1854	3	0.75212	-1.59394
SNAI3	4	0.46497	0.60289	1	11049	1	0.86133	0.025499	0.074374	0.7659	1855	3	0.86133	-1.59348
TGS1	4	0.20967	0.35102	1	6609	2	0.19966	0.025517	0.074414	0.765903	1856	2	0.19966	-1.59317
PPP1R11	4	0.94527	0.94532	1	17495	0	0.7978	0.025545	0.074458	0.765939	1857	2	0.7978	-1.59269
MRPL3	4	0.71758	0.73736	1	13475	1	1.3173	0.025579	0.074525	0.766214	1858	3	1.3173	-1.59212
C19orf60	4	0.070449	0.16081	0.96281	3192	1	0.74712	0.02561	0.074599	0.766385	1859	3	0.74712	-1.59159
SESN1	4	0.88538	0.88541	1	16319	0	0.47215	0.025619	0.074622	0.766385	1860	2	0.47215	-1.59144
DCPS	4	0.65772	0.69903	1	12779	1	0.46263	0.025653	0.074693	0.766707	1861	2	0.46263	-1.59086
C9orf62	4	0.95818	0.95824	1	17741	0	0.49697	0.025806	0.075003	0.769479	1862	3	0.49697	-1.58828
APH1A	4	0.66179	0.70147	1	12820	1	0.90079	0.025872	0.075136	0.770426	1863	3	0.90079	-1.58717
KDELR3	4	0.90211	0.90212	1	16612	0	0.68675	0.025941	0.075272	0.771266	1864	3	0.68675	-1.58601
RNF111	4	0.54291	0.63791	1	11676	1	0.6616	0.025951	0.075299	0.771266	1865	2	0.6616	-1.58585
MRPL11	4	0.6054	0.66936	1	12254	1	0.41981	0.026008	0.075428	0.772094	1866	2	0.41981	-1.58489
ZNF518A	4	0.21136	0.35279	1	6630	2	0.45365	0.026025	0.07546	0.772094	1867	2	0.45365	-1.58461
PHF3	4	0.93867	0.93864	1	17377	0	0.7006	0.026165	0.075756	0.774701	1868	3	0.7006	-1.58228
OVGP1	4	0.68955	0.71867	1	13137	1	0.31983	0.02621	0.075854	0.774784	1869	3	0.31983	-1.58153
FAM134A	4	0.90254	0.90255	1	16627	0	0.60572	0.026235	0.075909	0.774784	1870	3	0.60572	-1.58112
SNRPA1	4	0.83898	0.83911	1	15330	0	0.94582	0.026248	0.075933	0.774784	1871	3	0.94582	-1.5809
ZCCHC4	4	0.84005	0.84018	1	15380	0	0.51208	0.026255	0.07595	0.774784	1872	3	0.51208	-1.58079
NOL8	4	0.77631	0.7814	1	14263	1	0.86933	0.026265	0.075966	0.774784	1873	3	0.86933	-1.58062
AMY2B	4	0.44718	0.59458	1	10901	1	0.56877	0.026346	0.076146	0.776203	1874	2	0.56877	-1.57929
CACNG7	4	0.051866	0.1251	0.939388	2530	2	0.073727	0.026434	0.07634	0.777769	1875	2	0.073727	-1.57784
NPIPA5	4	0.78973	0.79265	1	14482	1	-0.046543	0.026463	0.076399	0.777948	1876	1	-0.046543	-1.57736
ZNF311	4	0.9443	0.94434	1	17480	0	0.72549	0.026493	0.076459	0.778148	1877	3	0.72549	-1.57687
CPNE5	4	0.96917	0.96924	1	17986	0	0.63265	0.026537	0.076551	0.778252	1878	3	0.63265	-1.57615
GPATCH11	4	0.95443	0.9545	1	17660	0	0.60304	0.026537	0.076551	0.778252	1879	3	0.60304	-1.57615
POT1	4	0.95325	0.95335	1	17634	0	0.62876	0.026596	0.076676	0.778824	1880	3	0.62876	-1.57518
CBLL1	4	0.88793	0.88796	1	16362	0	0.71707	0.026601	0.076689	0.778824	1881	3	0.71707	-1.5751
FAM86C1	4	0.1434	0.28303	0.992277	5451	1	0.73447	0.026645	0.076773	0.779273	1882	3	0.73447	-1.57438
CPT1B	4	0.67744	0.71102	1	12990	1	0.85555	0.026713	0.076927	0.78042	1883	3	0.85555	-1.57328
HIST1H2AH	4	0.27147	0.41432	1	7722	1	0.68726	0.026828	0.077159	0.781478	1884	3	0.68726	-1.57141
ZBED6	4	0.91134	0.91132	1	16795	0	0.61227	0.026843	0.077194	0.781478	1885	3	0.61227	-1.57117
RNF19A	4	0.38884	0.53434	1	9842	1	0.81586	0.026898	0.077318	0.781478	1886	2	0.81586	-1.57028
SOX14	4	0.88517	0.8852	1	16315	0	0.68558	0.026903	0.077325	0.781478	1887	3	0.68558	-1.5702
FAM69A	4	0.46303	0.60206	1	11034	1	1.0931	0.026957	0.07743	0.781478	1888	3	1.0931	-1.56933
NNT	4	0.90453	0.90451	1	16666	0	0.92769	0.026969	0.077455	0.781478	1889	3	0.92769	-1.56914
PIGQ	4	0.21336	0.3548	1	6671	1	0.34272	0.026969	0.077458	0.781478	1890	3	0.34272	-1.56914
C15orf41	4	0.97469	0.97484	1	18105	0	0.65463	0.026997	0.077514	0.781478	1891	3	0.65463	-1.56868
HIST1H3G	4	0.9265	0.92644	1	17113	0	0.52362	0.027026	0.077574	0.781478	1892	2	0.52362	-1.56822
DCUN1D1	4	0.96051	0.96058	1	17789	0	0.68987	0.027038	0.077596	0.781478	1893	3	0.68987	-1.56803
C9orf152	4	0.77086	0.77691	1	14192	1	0.49573	0.027043	0.077605	0.781478	1894	3	0.49573	-1.56795
PCED1B	4	0.91022	0.91016	1	16772	0	0.45777	0.027044	0.077607	0.781478	1895	2	0.45777	-1.56793
FGG	4	0.91183	0.91179	1	16805	0	0.57229	0.02709	0.077715	0.781478	1896	3	0.57229	-1.56719
UFD1L	4	0.2538	0.39616	1	7415	2	-0.21489	0.027096	0.077723	0.781478	1897	1	-0.21489	-1.56709
CPSF6	4	0.93773	0.93771	1	17347	0	0.13407	0.027096	0.077723	0.781478	1898	1	0.13407	-1.56709
RPS10-NUDT3	4	0.69069	0.7194	1	13147	1	-0.30705	0.027096	0.077723	0.781478	1899	1	-0.30705	-1.56709
EVA1B	4	0.14634	0.28612	0.993441	5506	1	0.7395	0.027101	0.077733	0.781478	1900	3	0.7395	-1.56701
KLRF1	4	0.90131	0.90134	1	16601	0	0.58185	0.027117	0.077768	0.781478	1901	3	0.58185	-1.56676
TMEM179B	4	0.44777	0.59517	1	10914	1	0.80491	0.027216	0.077986	0.783236	1902	3	0.80491	-1.56518
DDX1	4	0.91294	0.91289	1	16834	0	0.42643	0.027248	0.078046	0.783236	1903	2	0.42643	-1.56467
PALM3	4	0.90094	0.90096	1	16592	0	0.58075	0.027256	0.078065	0.783236	1904	3	0.58075	-1.56454
CCDC130	4	0.20626	0.34758	1	6532	1	0.77191	0.0273	0.078157	0.783686	1905	3	0.77191	-1.56384
KLK2	4	0.74391	0.75628	1	13809	1	0.61115	0.027318	0.078192	0.783686	1906	3	0.61115	-1.56355
CCDC90B	4	0.93408	0.93402	1	17263	0	0.5651	0.027341	0.078242	0.783769	1907	3	0.5651	-1.56319
ALG6	4	0.43996	0.58715	1	10762	1	0.86214	0.027363	0.078286	0.783799	1908	3	0.86214	-1.56284
ARHGEF11	4	0.92228	0.92232	1	17027	0	0.79071	0.02739	0.078336	0.783848	1909	3	0.79071	-1.56241
LTV1	4	0.28463	0.42781	1	7969	2	0.61645	0.027413	0.07838	0.783848	1910	2	0.61645	-1.56204
UBB	4	0.012556	0.041459	0.873794	904	2	-0.0072899	0.027432	0.078414	0.783848	1911	2	-0.0072899	-1.56174
NBEAL1	4	0.74669	0.75835	1	13854	1	0.84052	0.02751	0.078576	0.785064	1912	3	0.84052	-1.56051
RWDD3	4	0.71031	0.73244	1	13396	1	0.84131	0.027547	0.078656	0.785455	1913	3	0.84131	-1.55993
ALG10B	4	0.28991	0.43329	1	8056	1	0.22588	0.027577	0.078713	0.785609	1914	2	0.22588	-1.55945
SLC35B1	4	0.96953	0.96962	1	17996	0	0.92915	0.027603	0.078768	0.785746	1915	3	0.92915	-1.55904
MRS2	4	0.33198	0.47626	1	8801	2	0.43108	0.02766	0.078885	0.786254	1916	2	0.43108	-1.55815
BCLAF1	4	0.83898	0.83911	1	15368	0	0.59176	0.02767	0.078901	0.786254	1917	2	0.59176	-1.55799
PRR20E	4	0.85283	0.85291	1	15642	0	0.76482	0.027708	0.07898	0.786381	1918	3	0.76482	-1.55739
DEFB112	4	0.68172	0.71376	1	13030	1	0.20277	0.027728	0.079017	0.786381	1919	2	0.20277	-1.55708
CUL9	4	0.032474	0.086607	0.919616	1787	1	0.59283	0.027737	0.079037	0.786381	1920	2	0.59283	-1.55694
CENPJ	4	0.11047	0.23357	0.986175	4518	1	0.59052	0.027784	0.079132	0.78691	1921	3	0.59052	-1.55621
TBC1D13	4	0.32746	0.47167	1	8719	1	0.68928	0.027836	0.07924	0.787214	1922	3	0.68928	-1.55539
ZWILCH	4	0.97028	0.97039	1	18009	0	0.66489	0.027837	0.079244	0.787214	1923	3	0.66489	-1.55538
PLA2G3	4	0.77288	0.77858	1	14218	1	0.55587	0.027931	0.07944	0.788355	1924	3	0.55587	-1.55391
RRM1	4	0.46678	0.60365	1	11063	1	1.0629	0.027933	0.079442	0.788355	1925	3	1.0629	-1.55388
LINGO4	4	0.78209	0.78619	1	14354	1	0.76069	0.027957	0.079483	0.788357	1926	3	0.76069	-1.55351
RAB10	4	0.5192	0.62685	1	11481	1	0.63795	0.028027	0.079645	0.78923	1927	3	0.63795	-1.55242
DNTTIP2	4	0.97195	0.97207	1	18048	0	0.96207	0.028038	0.079668	0.78923	1928	3	0.96207	-1.55225
C12orf56	4	0.29026	0.43365	1	8061	2	0.33707	0.028062	0.079715	0.78923	1929	2	0.33707	-1.55188
RAD50	4	0.32253	0.46661	1	8617	1	1.0076	0.028088	0.079777	0.78923	1930	3	1.0076	-1.55148
CARD8	4	0.75673	0.76589	1	13991	1	0.55803	0.028098	0.079795	0.78923	1931	3	0.55803	-1.55132
ZRSR2	4	0.97367	0.9738	1	18083	0	0.75443	0.028118	0.079834	0.78923	1932	3	0.75443	-1.55102
TOR2A	4	0.91649	0.91645	1	16907	0	0.53707	0.028133	0.07986	0.78923	1933	3	0.53707	-1.55078
KDM5C	4	0.59004	0.66123	1	12109	1	0.64411	0.028215	0.079998	0.790183	1934	2	0.64411	-1.54952
HSPA9	4	0.19416	0.33525	1	6308	1	0.67161	0.02827	0.080118	0.790962	1935	3	0.67161	-1.54867
MYL6	4	0.026875	0.075082	0.918939	1557	2	0.13074	0.028316	0.080207	0.791019	1936	2	0.13074	-1.54797
DNAJA3	4	0.8195	0.8198	1	15008	1	0.7334	0.028316	0.080207	0.791019	1937	2	0.7334	-1.54797
ST7	4	0.3845	0.52991	1	9760	2	0.35719	0.02836	0.080297	0.7915	1938	2	0.35719	-1.54729
GAR1	4	0.48038	0.60953	1	11169	1	0.67359	0.028408	0.080404	0.792148	1939	3	0.67359	-1.54656
BRCA2	4	0.4532	0.59786	1	10967	1	0.775	0.028441	0.080473	0.792413	1940	3	0.775	-1.54606
IGFL4	4	0.3686	0.51353	1	9459	1	0.61129	0.02851	0.080618	0.793335	1941	3	0.61129	-1.545
NFYB	4	0.66781	0.70506	1	12888	1	0.64456	0.028523	0.080649	0.793335	1942	3	0.64456	-1.5448
MTIF2	4	0.098631	0.21258	0.979765	4145	1	1.1963	0.028567	0.080737	0.793793	1943	3	1.1963	-1.54414
MCF2L	4	0.88042	0.88045	1	16210	0	0.77142	0.028592	0.080782	0.793823	1944	3	0.77142	-1.54376
ADSS	4	0.54119	0.63709	1	11660	1	0.91733	0.02864	0.08087	0.794273	1945	3	0.91733	-1.54303
ASIP	4	0.80062	0.80223	1	14658	1	0.79451	0.028655	0.080911	0.794273	1946	3	0.79451	-1.5428
ABCD2	4	0.49576	0.61626	1	11290	1	0.57992	0.028702	0.081004	0.794429	1947	3	0.57992	-1.54209
TAAR6	4	0.84551	0.84556	1	15495	0	0.68587	0.028703	0.08101	0.794429	1948	3	0.68587	-1.54207
SRF	4	0.78685	0.79019	1	14432	1	0.94875	0.028799	0.081211	0.795594	1949	3	0.94875	-1.54062
PATZ1	4	0.53014	0.63189	1	11566	1	0.5848	0.0288	0.081212	0.795594	1950	2	0.5848	-1.54061
ZFPM1	4	0.88767	0.88768	1	16355	0	0.57875	0.028824	0.081263	0.795688	1951	2	0.57875	-1.54025
NPR1	4	0.094898	0.20587	0.978096	4019	1	0.70867	0.028848	0.081315	0.795788	1952	3	0.70867	-1.53988
EFHD2	4	0.40099	0.54695	1	10059	1	0.60677	0.028902	0.081422	0.796429	1953	3	0.60677	-1.53907
SF3A2	4	0.83898	0.83911	1	15343	0	0.86685	0.028935	0.081488	0.796665	1954	3	0.86685	-1.53858
OR51B6	4	0.73311	0.74836	1	13673	1	0.72722	0.029064	0.081723	0.798551	1955	3	0.72722	-1.53664
TMEM248	4	0.96003	0.96009	1	17780	0	0.47218	0.029137	0.081872	0.799068	1956	3	0.47218	-1.53556
SLAIN1	4	0.91717	0.91716	1	16924	0	0.70259	0.029164	0.08193	0.799068	1957	2	0.70259	-1.53515
CCT2	4	0.51854	0.62654	1	11478	1	0.93908	0.029169	0.081943	0.799068	1958	3	0.93908	-1.53508
PRPF6	4	0.56572	0.649	1	11895	1	0.47565	0.029169	0.081943	0.799068	1959	3	0.47565	-1.53508
MAD2L1	4	0.71741	0.73723	1	13474	1	1.0675	0.029194	0.081989	0.799115	1960	3	1.0675	-1.53471
CDC7	4	0.83898	0.83911	1	15349	0	0.56841	0.029295	0.082192	0.800308	1961	2	0.56841	-1.53321
SETD6	4	0.71844	0.73796	1	13483	1	0.66987	0.029297	0.082196	0.800308	1962	3	0.66987	-1.53318
DTL	4	0.83317	0.83332	1	15243	0	0.68143	0.029346	0.082287	0.80051	1963	2	0.68143	-1.53245
ADAMTSL1	4	0.38297	0.52829	1	9730	2	0.33487	0.029379	0.082345	0.80051	1964	2	0.33487	-1.53196
SOX12	4	0.95356	0.95364	1	17640	0	0.60642	0.029404	0.082389	0.80051	1965	2	0.60642	-1.53159
IL18BP	4	0.76084	0.76901	1	14053	1	0.68653	0.029427	0.08244	0.80051	1966	3	0.68653	-1.53125
ANKLE1	4	0.37149	0.51649	1	9523	2	0.41432	0.029443	0.082468	0.80051	1967	2	0.41432	-1.53102
TPRKB	4	0.95427	0.95434	1	17653	0	0.55251	0.029447	0.082476	0.80051	1968	2	0.55251	-1.53096
TAPBPL	4	0.83557	0.8357	1	15289	0	0.66717	0.029464	0.08251	0.80051	1969	3	0.66717	-1.53071
SPATS2	4	0.54451	0.63868	1	11694	1	0.53982	0.029536	0.082653	0.801235	1970	2	0.53982	-1.52965
ZBTB46	4	0.37527	0.52043	1	9589	1	0.5704	0.029545	0.082668	0.801235	1971	3	0.5704	-1.52952
DNMT1	4	0.3264	0.47058	1	8697	2	0.49997	0.029565	0.082711	0.801245	1972	2	0.49997	-1.52922
IPO5	4	0.91876	0.91878	1	16958	0	0.70124	0.029634	0.082847	0.801582	1973	3	0.70124	-1.52821
GTF3C5	4	0.96824	0.96832	1	17971	0	0.5358	0.029649	0.082875	0.801582	1974	3	0.5358	-1.52799
RPL9	4	0.95515	0.95521	1	17673	0	1.2219	0.029683	0.082949	0.801582	1975	3	1.2219	-1.52749
SKA2	4	0.96292	0.963	1	17851	0	1.2327	0.029683	0.082949	0.801582	1976	3	1.2327	-1.52749
SHISA8	4	0.93658	0.93653	1	17316	0	0.46264	0.029688	0.082959	0.801582	1977	3	0.46264	-1.52742
PRELP	4	0.97746	0.9776	1	18158	0	0.55881	0.029709	0.082998	0.801582	1978	3	0.55881	-1.52711
USB1	4	0.58098	0.65664	1	12029	1	0.72439	0.029762	0.083102	0.802188	1979	3	0.72439	-1.52634
FASTKD5	4	0.95433	0.95439	1	17656	0	0.42858	0.029788	0.083168	0.802423	1980	3	0.42858	-1.52596
SCAI	4	0.95151	0.95165	1	17601	0	0.98759	0.02986	0.08332	0.803406	1981	3	0.98759	-1.52491
HIRA	4	0.96663	0.96673	1	17935	0	0.55528	0.029877	0.083354	0.803406	1982	3	0.55528	-1.52466
GFI1B	4	0.63014	0.68298	1	12494	1	0.65926	0.029993	0.083592	0.805286	1983	3	0.65926	-1.52298
GTF2A1	4	0.88341	0.88349	1	16273	0	0.51672	0.03004	0.083694	0.805863	1984	3	0.51672	-1.5223
CAMK2B	4	0.21489	0.3564	1	6698	2	-0.19452	0.030128	0.083879	0.806804	1985	1	-0.19452	-1.52103
SLC22A7	4	0.88445	0.88451	1	16299	0	0.093404	0.030128	0.083879	0.806804	1986	2	0.093404	-1.52103
TMEM106C	4	0.86736	0.86746	1	15930	0	0.6676	0.030146	0.083918	0.806804	1987	3	0.6676	-1.52077
RIC1	4	0.92656	0.92651	1	17115	0	0.59152	0.030207	0.084046	0.807426	1988	3	0.59152	-1.51989
RHEBL1	4	0.74092	0.75404	1	13765	1	0.56508	0.030216	0.084067	0.807426	1989	3	0.56508	-1.51976
LOC102724862	4	0.77433	0.77977	1	14240	1	0.1515	0.03028	0.084192	0.807586	1990	2	0.1515	-1.51884
ECI1	4	0.74195	0.75478	1	13777	1	0.81033	0.030286	0.084211	0.807586	1991	3	0.81033	-1.51876
H2AFB3	4	0.4585	0.6001	1	11004	1	0.80864	0.030286	0.084211	0.807586	1992	3	0.80864	-1.51876
BNIP1	4	0.90589	0.90585	1	16691	0	0.80406	0.030355	0.084349	0.808117	1993	3	0.80406	-1.51777
SLC35A5	4	0.10025	0.2155	0.982568	4190	2	-0.050157	0.030355	0.084351	0.808117	1994	2	-0.050157	-1.51777
NOP9	4	0.32016	0.46418	1	8575	2	0.17704	0.030507	0.084653	0.8102	1995	2	0.17704	-1.5156
QKI	4	0.74641	0.75814	1	13849	1	0.48991	0.03052	0.084686	0.8102	1996	3	0.48991	-1.51542
AAMP	4	0.3782	0.52342	1	9641	1	0.51657	0.030557	0.084757	0.8102	1997	2	0.51657	-1.51489
TMEM127	4	0.91063	0.91059	1	16781	0	0.5487	0.03056	0.084762	0.8102	1998	3	0.5487	-1.51485
FOXP1	4	0.65747	0.69888	1	12775	1	0.64721	0.030571	0.08478	0.8102	1999	3	0.64721	-1.51469
[truncated: 17,114 more rows]

## Sheet: sgRNA scores and read counts
sgRNA sequence	Gene targeted	Mean read counts in DMSO samples	Mean read counts in olaparib samples	Log2 fold change of sgRNA	Raw variance in DMSO samples	Adjusted variance in DMSO samples	Score of the sgRNA	P-value (lower tail)	P-value (higher tail)	P-value (two-sided)	False discovery rate	Abundance is higher in olaparib samples	Read count DMSO sample replicate 1	Read count olaparib sample replicate 1	Read count DMSO sample replicate 2	Read count olaparib sample replicate 2
43525_41331_AGATGACCACAAGTGAAAGG	MARCHF1	182.82	169.01	-0.11265	95.357	2147.2	0.29797	0.38284	0.61716	0.76568	0.87292	FALSE	92	68	81	109
43525_41332_ATACAAAGACCAAACCACAC	MARCHF1	106.73	87.847	-0.27804	178.73	1050	0.5828	0.27966	0.72034	0.55932	0.73234	FALSE	60	27	41	65
43525_41333_GCGAACACCCGAGATCTCAG	MARCHF1	39.1	11.458	-1.6865	415.53	279.05	1.6547	0.03975	0.96025	0.0795	0.21366	FALSE	30	11	7	1
43525_41334_TCGACTTGCAGATCGCCCTG	MARCHF1	478.71	237.76	-1.0066	29898	7774.8	2.7326	0.0031417	0.99686	0.0062834	0.034846	FALSE	129	101	324	148
43525_47963_AACAAGTCTGCTATTTGATG	MARCHF1	804.19	959.63	0.25467	12106	15602	1.2445	0.89335	0.10665	0.21331	0.40795	TRUE	308	260	453	745
43525_47964_CCGCCAGCGACGCCTCAGAA	MARCHF1	888.73	601.56	-0.56225	41621	17846	2.1496	0.015794	0.98421	0.031588	0.11405	FALSE	292	246	549	384
43525_47965_GAAGCTGGTTATCCACTGGG	MARCHF1	481.88	663.63	0.46089	16622	7843.9	2.0522	0.97992	0.020077	0.040155	0.1346	TRUE	175	134	281	561
43525_47966_TCTCAGTGCAGCCTACACAA	MARCHF1	3.1702	8.5937	1.202	15.552	10.983	1.6365	0.93876	0.061241	0.12248	0.28457	TRUE	3	0	0	9
43526_38267_GCAGTAGCTGGTGTTAGATG	MARCHF2	447	176.65	-1.3345	38445	7092.4	3.2102	0.00066307	0.99934	0.0013261	0.010182	FALSE	64	68	359	117
43526_38268_GCTGCCGGAGCAGTCACACA	MARCHF2	315.97	346.61	0.13315	469.85	4457.3	0.45903	0.67689	0.32311	0.64621	0.79436	TRUE	132	76	167	287
43526_38269_GTCACCTGTGCCACATACTG	MARCHF2	429.04	402.95	-0.09029	340.4	6713.1	0.31842	0.37508	0.62492	0.75017	0.86327	FALSE	119	85	287	337
43526_38270_GTCCAAGGCACGGATGACGG	MARCHF2	270.53	294.1	0.12009	277.88	3621.9	0.39163	0.65233	0.34767	0.69533	0.82772	TRUE	37	53	219	255
43526_41263_AGTCTCTGCCTTTAATGTCA	MARCHF2	358.24	210.07	-0.76722	11170	5272.6	2.0405	0.020648	0.97935	0.041297	0.1372	FALSE	117	90	222	130
43526_41264_ATGGAGATGAGCACGAGGCG	MARCHF2	266.3	303.65	0.18867	698.07	3546.5	0.62709	0.7347	0.2653	0.5306	0.7112	TRUE	176	191	76	127
43526_41265_CAATTTGAGACAAACATGAA	MARCHF2	254.68	223.44	-0.18801	488.46	3341.2	0.54044	0.29444	0.70556	0.58889	0.75262	FALSE	119	124	122	110
43526_41266_GAGCGGGCAGTAGTCTGGGT	MARCHF2	49.667	113.63	1.1778	2130.4	382.13	3.272	0.99946	0.00053698	0.001074	0.0085758	TRUE	24	18	23	101
43527_57421_AAGGTCCCTGTACATTCACA	MARCHF3	407.9	322.74	-0.33692	3638.7	6273.8	1.0752	0.14115	0.85885	0.28229	0.48624	FALSE	184	125	202	213
43527_57422_CAAACCCAGGCCGTTAGTGG	MARCHF3	196.56	286.46	0.5411	4076.8	2364.8	1.8487	0.96775	0.032249	0.064499	0.18548	TRUE	94	55	92	245
43527_57423_GAAACTTGCATGACATACTG	MARCHF3	126.81	70.66	-0.83477	1609.6	1319.9	1.5456	0.060879	0.93912	0.12176	0.28346	FALSE	55	35	65	39
43527_57424_TCGTGGCAGATCCTGCACAT	MARCHF3	459.69	312.24	-0.55652	10971	7363.4	1.7183	0.042873	0.95713	0.085745	0.22487	FALSE	101	59	334	268
43528_45891_ATCAAGTGGATCAGCGAGCG	MARCHF4	430.1	444.01	0.045826	96.795	6735.3	0.16953	0.56731	0.43269	0.86538	0.93221	TRUE	158	94	249	371
43528_45892_CTGGTGGCGCAACATCTGGG	MARCHF4	101.45	193.84	0.92737	4377.6	981.6	2.9488	0.9984	0.0015958	0.0031917	0.02058	TRUE	44	50	52	153
43528_45893_CTTCTGTAAGGAGAAGACCG	MARCHF4	478.71	348.52	-0.45676	8526.9	7774.8	1.4764	0.069915	0.93009	0.13983	0.31112	FALSE	145	144	308	221
43528_45894_TTGTTGGCCGCCAAACCGGG	MARCHF4	172.25	70.66	-1.2736	5407.7	1983.5	2.2811	0.011218	0.98878	0.022435	0.089199	FALSE	58	38	105	36
43529_40423_AGGACTATGTGCTTAGACTG	MARCHF5	88.767	288.37	1.6886	21551	822.45	6.96	1	1.7033e-12	3.4067e-12	1.0875e-10	TRUE	20	25	64	277
43529_40424_AGGTATTCAGCATTGCACTG	MARCHF5	102.5	340.88	1.7238	30827	995.18	7.5565	1	2.0719e-14	4.1439e-14	1.5209e-12	TRUE	37	18	60	339
43529_40425_CCAGGCCTGTCTACAACGCT	MARCHF5	58.121	158.51	1.4319	5342.1	470.03	4.6303	1	1.8325e-06	3.665e-06	5.6818e-05	TRUE	18	30	37	136
43529_40426_CTGAATGGGTGAGACCATGC	MARCHF5	92.994	280.73	1.5837	18900	874.71	6.3477	1	1.094e-10	2.188e-10	5.9454e-09	TRUE	41	46	47	248
43530_27685_CCCCACCGTTCAATGCTGCG	MARCHF6	359.29	354.25	-0.02033	12.708	5293.4	0.069292	0.47238	0.52762	0.94476	0.97367	FALSE	86	107	254	264
43530_27686_TCTCAGTAGTAGAATGAAGG	MARCHF6	5.2837	32.465	2.413	435.16	20.959	5.9372	1	1.655e-09	3.3101e-09	7.9336e-08	TRUE	3	1	2	33
43530_27687_TGTCCCTGTTCGAGTAATGC	MARCHF6	102.5	129.86	0.33834	375.49	995.18	0.86717	0.80697	0.19303	0.38607	0.58736	TRUE	25	36	72	100
43530_27688_TTGGTTTCATTATACACTTG	MARCHF6	206.07	397.22	0.94348	18753	2518.6	3.809	0.99993	6.9774e-05	0.00013955	0.0015108	TRUE	65	87	130	329
43531_48151_AGATCTAGATGATGTATCAG	MARCHF7	662.58	528.99	-0.3243	8951.2	12026	1.2182	0.11158	0.88842	0.22316	0.41925	FALSE	261	203	366	351
43531_48152_ATGAAGGTAGGCGGACAACG	MARCHF7	866.53	918.57	0.084048	1354.4	17250	0.39624	0.65404	0.34596	0.69193	0.8254	TRUE	290	254	530	708
43531_48153_ATGGATTATAGTCACCGAAG	MARCHF7	240.94	273.09	0.18001	517.36	3102.8	0.5772	0.71809	0.28191	0.56381	0.73654	TRUE	111	79	117	207
43531_48154_CAAACTGTACTACCTCAGCT	MARCHF7	559.02	697.05	0.31785	9554.8	9572.8	1.4107	0.92084	0.07916	0.15832	0.33697	TRUE	157	157	372	573
43532_65637_CATAGGATCTGCCACTGTGA	MARCHF8	490.33	758.16	0.62771	36288	8028.9	2.989	0.9986	0.0013995	0.0027989	0.018529	TRUE	163	180	301	614
43532_65638_GCTCATTGACCGTACTGCTG	MARCHF8	258.9	352.34	0.4431	4391.3	3415.5	1.5988	0.94507	0.054928	0.10986	0.26487	TRUE	114	101	131	268
43532_65639_GGCAGGCCTGGTGCACGAAG	MARCHF8	338.16	301.74	-0.1639	663.88	4880.9	0.52135	0.30106	0.69894	0.60212	0.76267	FALSE	100	84	220	232
43532_65640_TCTGTAGACTCTAGCAGAGA	MARCHF8	618.2	399.13	-0.62993	24280	10957	2.0928	0.018184	0.98182	0.036367	0.12562	FALSE	172	165	413	253
43533_56401_AGCGCACTGAGCCGTCGCAG	MARCHF9	248.34	297.92	0.26165	1231.6	3230.6	0.8723	0.80848	0.19152	0.38305	0.58475	TRUE	47	61	188	251
43533_56402_GCGACGAGGAGGAGTACTAC	MARCHF9	151.11	276.91	0.86945	8090.6	1666.3	3.0816	0.99897	0.0010295	0.0020589	0.014469	TRUE	70	61	73	229
43533_56403_TGGAAGCAGATCCGGCACTG	MARCHF9	349.78	235.85	-0.56661	6553	5106.8	1.5943	0.055431	0.94457	0.11086	0.26643	FALSE	79	93	252	154
43533_56404_TTCAGCCAAGTGGCAACGAC	MARCHF9	905.63	723.78	-0.32297	16586	18304	1.3441	0.089457	0.91054	0.17891	0.36426	FALSE	195	248	662	510
43534_63501_AAGTATTGAGTGAGTTCTCG	MARCHF10	417.42	399.13	-0.064463	167.18	6470.5	0.2273	0.41009	0.58991	0.82019	0.90601	FALSE	159	110	236	308
43534_63502_AATGCATGAATGATGCAGGA	MARCHF10	368.81	347.57	-0.085321	225.54	5481.9	0.28682	0.38712	0.61288	0.77425	0.87806	FALSE	103	103	246	261
43534_63503_AGATGACCTGCTAGAAAACC	MARCHF10	177.53	239.67	0.43086	1941.3	2064.9	1.3674	0.91425	0.085755	0.17151	0.35469	TRUE	65	73	103	178
43534_63504_CACCTGGAGAGGGTTCGCTG	MARCHF10	349.78	296.01	-0.24009	1448.5	5106.8	0.75253	0.22587	0.77413	0.45173	0.64661	FALSE	88	88	243	222
43535_73053_ACTGACCCATCACATCGGCA	MARCHF11	440.66	515.62	0.22617	2813.8	6957.9	0.89865	0.81558	0.18442	0.36884	0.57157	TRUE	132	107	285	433
43535_73054_AGGTCCGAGGCGCCTCCCGG	MARCHF11	238.83	236.81	-0.012202	2.04	3066.5	0.036476	0.48545	0.51455	0.97089	0.98603	FALSE	57	46	169	202
43535_73055_GCCAAGCGAGCCGCTAGGGG	MARCHF11	62.348	136.54	1.1185	2855.4	515.63	3.2675	0.99946	0.00054412	0.0010882	0.008663	TRUE	43	44	16	99
43535_73056_TCTATAACAGCAAAGTTCAC	MARCHF11	119.41	174.74	0.54545	1544.3	1218.6	1.5849	0.94349	0.056513	0.11303	0.26968	TRUE	47	55	66	128
43709_4773_ACCCTGGCCATTGAGCGCCG	SEPTIN1	201.84	386.72	0.93467	17534	2449.9	3.7352	0.99991	9.3799e-05	0.0001876	0.0019582	TRUE	93	70	98	335
43709_4774_CAGTACCTTAGGGATGAGAG	SEPTIN1	158.51	183.33	0.20865	308.44	1775.7	0.58902	0.72205	0.27795	0.5559	0.73007	TRUE	64	95	86	97
43709_4775_CGGAGGAAGGCCACATCTAG	SEPTIN1	128.92	185.24	0.51952	1598.9	1349.2	1.5333	0.93738	0.062616	0.12523	0.28892	TRUE	28	42	94	152
43709_4776_GTTTGACTTCACGCTAATGG	SEPTIN1	108.85	231.08	1.0791	7728.4	1077.6	3.7235	0.9999	9.8299e-05	0.0001966	0.0020386	TRUE	24	41	79	201
43710_12409_ATATTGATGAGCAATTTGAG	SEPTIN2	494.56	316.06	-0.64431	16129	8121.9	1.9807	0.023815	0.97618	0.04763	0.15131	FALSE	129	104	339	227
43710_12410_GGTCAAGCTACGCCTGACAG	SEPTIN2	435.38	515.62	0.24353	3225.3	6846.4	0.9698	0.83393	0.16607	0.33215	0.53673	TRUE	139	122	273	418
43710_12411_TATGAAGGCAATACACAACA	SEPTIN2	119.41	135.59	0.18187	130.99	1218.6	0.46342	0.67837	0.32163	0.64326	0.79202	TRUE	43	66	70	76
43710_12412_TTTCTGGGTACAGATCAGTT	SEPTIN2	199.73	260.68	0.38256	1865.7	2415.8	1.2401	0.89253	0.10747	0.21495	0.40984	TRUE	102	89	87	184
43711_43783_CAAATCCCAAGTGAGCCGCA	SEPTIN3	212.41	208.16	-0.029	9.0186	2622.5	0.082932	0.46694	0.53306	0.93389	0.96877	FALSE	58	73	143	145
43711_43784_GACTTCAACATCATGGTCGT	SEPTIN3	603.4	462.15	-0.38403	10020	10607	1.3715	0.085105	0.91489	0.17021	0.35292	FALSE	208	187	363	297
43711_43785_GGTACATACGAGTGTCCTGT	SEPTIN3	250.45	322.74	0.36458	2623.6	3267.4	1.2647	0.89702	0.10298	0.20597	0.39909	TRUE	72	105	165	233
43711_43786_TCCAACCTGCTGGGCTACAT	SEPTIN3	346.61	439.24	0.34079	4304.4	5044.9	1.304	0.90389	0.096112	0.19222	0.38181	TRUE	109	117	219	343
43712_14321_AAAGAACATCCAAGACAACA	SEPTIN4	57.064	144.18	1.3222	3991.2	458.8	4.0673	0.99998	2.3875e-05	4.775e-05	0.00058723	TRUE	36	54	18	97
43712_14322_ATGCAGTCAACAACACAGAG	SEPTIN4	270.53	336.11	0.31212	2156.9	3621.9	1.0897	0.86209	0.13791	0.27583	0.47904	TRUE	124	83	132	269
43712_14323_GGAGATCACTAAGCATGCAG	SEPTIN4	116.24	133.68	0.20005	152.23	1175.9	0.50853	0.69435	0.30565	0.61129	0.76979	TRUE	49	56	61	84
43712_14324_TGGAGTTCAGACCCCCCTCG	SEPTIN4	647.79	653.12	0.01182	14.244	11667	0.049414	0.51971	0.48029	0.96059	0.98121	TRUE	123	170	490	514
43713_14317_CACACACCCATGCCCGAAGG	SEPTIN5	87.71	246.35	1.4794	13386	809.51	5.5759	1	1.2329e-08	2.4658e-08	5.3428e-07	TRUE	22	29	61	229
43713_14318_GAAGCCCATCACCGACTATG	SEPTIN5	405.79	321.79	-0.3337	3540.1	6230.3	1.0642	0.14361	0.85639	0.28722	0.4915	FALSE	95	72	289	265
43713_14319_GACATTGACAAGCAGTACGT	SEPTIN5	306.46	235.85	-0.37641	2503.3	4278.8	1.0794	0.1402	0.8598	0.2804	0.48416	FALSE	61	57	229	190
43713_14320_GGTAGAGATTCTAAAACACA	SEPTIN5	51.781	132.73	1.3412	3450.5	403.68	4.0288	0.99997	2.8177e-05	5.6353e-05	0.00068164	TRUE	26	38	23	101
43714_31899_ACCTCCAAGAGAGCAACGTG	SEPTIN6	700.62	841.23	0.26352	9905.8	12963	1.235	0.89158	0.10842	0.21684	0.41205	TRUE	159	129	504	752
43714_31900_ACTTCAGGGAATGACCCGTG	SEPTIN6	172.25	211.02	0.29137	753.64	1983.5	0.87062	0.80801	0.19199	0.38398	0.58563	TRUE	60	43	103	178
43714_31901_CTGCTATGCAGTTGAAAACG	SEPTIN6	600.23	952	0.66454	62683	10532	3.4277	0.9997	0.0003044	0.0006088	0.0053557	TRUE	237	246	331	751
43714_31902_TGTTCAACACCAAATTCGAA	SEPTIN6	193.38	169.01	-0.1933	297.4	2314.1	0.5067	0.30616	0.69384	0.61233	0.77059	FALSE	71	52	112	125
43715_2793_CTGGAGAATACAAATCTGTG	SEPTIN7	46.497	230.12	2.2827	19286	350.37	9.8099	1	5.1379e-23	1.0276e-22	6.3007e-21	TRUE	28	38	16	203
43715_2794_TACAGAAAATCGGTGAAGAG	SEPTIN7	169.08	283.59	0.74269	6665	1935	2.6032	0.99538	0.0046175	0.0092351	0.04667	TRUE	69	58	91	239
43715_2795_TTACCTTCAGCAACACCCCA	SEPTIN7	61.291	330.38	2.4114	41929	504.13	11.985	1	2.1437e-33	4.2874e-33	3.7859e-31	TRUE	37	29	21	317
43715_2796_TTACTACCTACCACAGCAAG	SEPTIN7	125.75	163.28	0.37415	707.16	1305.3	1.0387	0.8505	0.1495	0.299	0.50352	TRUE	28	38	91	133
43716_31971_CAACACGACCTTCGAGACTG	SEPTIN8	1123.3	774.39	-0.53606	61400	24460	2.231	0.012839	0.98716	0.025678	0.098281	FALSE	270	249	793	562
43716_31972_CCAGATCTACCAGTTCCCCA	SEPTIN8	189.16	361.89	0.93234	15304	2247	3.644	0.99987	0.00013421	0.00026843	0.0026664	TRUE	67	75	112	304
43716_31973_CGAGCACGGCAGTACCCCTG	SEPTIN8	1063.1	660.76	-0.68523	82066	22711	2.6697	0.0037963	0.9962	0.0075925	0.040126	FALSE	249	171	757	521
43716_31974_GGTAGTCGAAGAGCGAGCGG	SEPTIN8	652.01	599.65	-0.12058	1371.5	11769	0.48265	0.31467	0.68533	0.62934	0.78263	FALSE	215	143	402	485
43717_29207_CGTGATGGACTTGATCTCGA	SEPTIN9	231.43	113.63	-1.0198	7153	2940.4	2.1724	0.014903	0.9851	0.029806	0.10946	FALSE	25	18	194	101
43717_29208_GCCTGCATCACGGAACGAGA	SEPTIN9	232.48	263.54	0.18017	482.73	2958.3	0.57099	0.716	0.284	0.56801	0.73978	TRUE	68	46	152	230
43717_29209_TCATTGATGAACTTCATGAT	SEPTIN9	313.85	230.12	-0.44603	3526.6	4417.5	1.2598	0.10387	0.89613	0.20773	0.40133	FALSE	79	63	218	178
43717_29210_TCCCCTACTCCGAGCCACTG	SEPTIN9	161.68	190.97	0.23884	429.68	1823.1	0.68596	0.75361	0.24639	0.49277	0.68102	TRUE	56	31	97	169
43718_62425_AAATCCCACTGTATTCACAA	SEPTIN10	149	188.11	0.33423	767.22	1635.4	0.96701	0.83321	0.16679	0.33358	0.53812	TRUE	59	43	82	154
43718_62426_ATGGATGCGAGAATCATGGT	SEPTIN10	721.76	569.1	-0.34231	11694	13491	1.3143	0.094365	0.90563	0.18873	0.3774	FALSE	167	145	516	451
43718_62427_CCAGATATACCAGTTCCCAA	SEPTIN10	40.156	102.17	1.3258	2023.6	288.99	3.6479	0.99987	0.0001334	0.00026679	0.0026544	TRUE	24	33	14	74
43718_62428_GCAAACTCTCAAAACCAACA	SEPTIN10	53.894	37.24	-0.52159	139.86	425.52	0.80738	0.20616	0.79384	0.41232	0.61071	FALSE	37	18	14	21
43719_43251_CTTTAGTGAATGTCCAGTAG	SEPTIN11	118.36	246.35	1.0513	8460.5	1204.3	3.6883	0.99989	0.0001129	0.0002258	0.0022996	TRUE	28	30	84	228
43719_43252_GAGTGAACTGGTCAGCAATG	SEPTIN11	722.82	621.61	-0.21729	5128.2	13518	0.87044	0.19203	0.80797	0.38406	0.58569	FALSE	250	320	434	331
43719_43253_GATTGGCAACAAGATGGCAA	SEPTIN11	443.83	538.54	0.27846	4495.1	7025.1	1.1299	0.87075	0.12925	0.2585	0.46014	TRUE	141	106	279	458
43719_43254_TGAATAACTTACCAACACAA	SEPTIN11	87.71	89.757	0.032908	2.0946	809.51	0.071936	0.52819	0.47181	0.94362	0.97322	TRUE	30	9	53	85
43720_58729_CGCTGTTCAAGTCCAAAGTG	SEPTIN12	354.01	301.74	-0.2298	1368.5	5189.5	0.72566	0.23402	0.76598	0.46805	0.66075	FALSE	106	105	229	211
43720_58730_GATCAACAATGACAACTGGT	SEPTIN12	366.69	304.6	-0.26685	1931.8	5439.8	0.84186	0.19993	0.80007	0.39987	0.59994	FALSE	69	122	278	197
43720_58731_GCTGTGCCGGACTGTGAATG	SEPTIN12	156.4	113.63	-0.45746	920.46	1744.3	1.0241	0.15282	0.84718	0.30564	0.50979	FALSE	78	70	70	49
43720_58732_GGACCAAGCATCTCGCAGGG	SEPTIN12	202.9	236.81	0.22195	575.79	2467.1	0.6827	0.7526	0.2474	0.49481	0.68243	TRUE	53	67	139	181
43722_69733_ACTGAAACTTACACTAACTG	SEPTIN14	274.75	251.13	-0.12923	279.24	3697.7	0.38854	0.34881	0.65119	0.69761	0.82907	FALSE	76	151	184	112
43722_69734_AGAATCATGGTACTCAAACA	SEPTIN14	270.53	545.22	1.0084	38864	3621.9	4.5644	1	2.5041e-06	5.0083e-06	7.5855e-05	TRUE	160	108	96	463
43722_69735_AGAGGCCGTCACTACCCTTG	SEPTIN14	906.69	936.72	0.046954	450.85	18333	0.22177	0.58775	0.41225	0.82449	0.90854	TRUE	316	301	542	680
43722_69736_GTGAGCAGATCTATCCGACA	SEPTIN14	293.78	422.05	0.5212	8293.9	4043.7	2.0172	0.97816	0.021839	0.043679	0.14242	TRUE	122	136	156	306
43723_24729_AACAACCGTAGCCCAAACGC	SEPTIN15	107.79	84.983	-0.33941	260.97	1063.8	0.69923	0.24184	0.75816	0.48369	0.67356	FALSE	31	42	71	47
43723_24730_GGAAGGTTCCCTCAAGTCCA	SEPTIN15	180.7	324.65	0.84174	10580	2114.2	3.1307	0.99913	0.00087208	0.0017442	0.012689	TRUE	83	63	88	277
43723_24731_GTTGGCGACTGTGCTTCAAG	SEPTIN15	332.88	377.17	0.17972	981.93	4779.2	0.64072	0.73915	0.26085	0.52171	0.70376	TRUE	152	114	163	281
43723_24732_TTGCAGAGGATGCTGTCAGG	SEPTIN15	89.824	196.7	1.1222	5924.9	835.44	3.6977	0.99989	0.00010889	0.00021779	0.0022288	TRUE	32	56	53	150
43800_37239_ACAGAGAGAGGTCTGTAAAG	DELEC1	581.21	526.13	-0.14339	1518.1	10086	0.54848	0.29168	0.70832	0.58336	0.74929	FALSE	184	177	366	374
43800_37240_TACAGACCTCTCTCTGTGCA	DELEC1	1325.2	989.23	-0.42141	56724	30558	1.9217	0.027323	0.97268	0.054645	0.16606	FALSE	330	359	924	677
43800_37241_TCATGTGTAACACGGCAAGA	DELEC1	701.68	592.97	-0.24248	5919.7	12989	0.95387	0.17007	0.82993	0.34015	0.54439	FALSE	190	224	474	397
43800_37242_TCTTGCCGTGTTACACATGA	DELEC1	728.1	423	-0.78204	47389	13651	2.6113	0.0045095	0.99549	0.0090191	0.045853	FALSE	135	141	554	302
A1BG_1_CATCTTCTTTCACCTGAACG	A1BG	613.97	468.84	-0.38836	10580	10857	1.3929	0.081824	0.91818	0.16365	0.34448	FALSE	194	144	387	347
A1BG_2_CTCCGGGGAGAACTCCGGCG	A1BG	700.62	690.36	-0.021254	52.639	12963	0.090119	0.4641	0.5359	0.92819	0.96599	FALSE	219	192	444	531
A1BG_3_TCTCCATGGTGCATCAGCAC	A1BG	6.3405	11.458	0.76316	13.372	26.439	0.99532	0.82071	0.17929	0.35858	0.56193	TRUE	2	3	4	9
A1BG_4_TGGAAGTCCACTCCACTCAG	A1BG	1036.7	797.31	-0.37833	28770	21955	1.6154	0.053108	0.94689	0.10622	0.25915	FALSE	205	211	776	624
A1CF_36947_ACAGGAAGAATTCAGTTATG	A1CF	682.66	544.27	-0.32631	9606.4	12518	1.2369	0.10807	0.89193	0.21613	0.41124	FALSE	270	250	376	320
A1CF_36948_AGTTATGTTAGGTATACCCG	A1CF	205.01	390.54	0.92644	17649	2501.4	3.7095	0.9999	0.00010382	0.00020764	0.0021377	TRUE	59	49	135	360
A1CF_36949_CTTCATTTCCCAGCCACCAA	A1CF	294.83	265.45	-0.15091	431.94	4063.2	0.46094	0.32242	0.67758	0.64484	0.79325	FALSE	110	81	169	197
A1CF_36950_GAATTCAACAATATCAAACC	A1CF	72.916	79.253	0.11868	20.092	634.03	0.2517	0.5986	0.4014	0.80279	0.89653	TRUE	23	15	46	68
A2M_5_ACTGCATCTGTGCAAACGGG	A2M	229.31	196.7	-0.22028	532.59	2904.6	0.60513	0.27254	0.72746	0.54508	0.72149	FALSE	67	75	150	131
A2M_6_ATGTCTCATGAACTACCCTG	A2M	459.69	399.13	-0.20331	1835.7	7363.4	0.70567	0.2402	0.7598	0.48039	0.67118	FALSE	228	180	207	238
A2M_7_TGAAATGAAACTTCACACTG	A2M	247.28	189.06	-0.38549	1702.2	3212.3	1.0272	0.15216	0.84784	0.30433	0.5086	FALSE	88	56	146	142
A2M_8_TTACTCATATAGGATCCCAA	A2M	221.92	149.91	-0.56279	2617	2780.3	1.3656	0.086025	0.91397	0.17205	0.35524	FALSE	82	69	128	88
A2ML1_61349_AAATACTTACTGGTATCGAG	A2ML1	145.83	260.68	0.83363	6731.7	1589.3	2.8808	0.99802	0.0019836	0.0039672	0.024464	TRUE	69	82	69	191
A2ML1_61350_ACCCTGGTTACTGATAACAA	A2ML1	53.894	145.14	1.4126	4407.5	425.52	4.4233	1	4.8816e-06	9.7631e-06	0.00013926	TRUE	24	33	27	119
A2ML1_61351_GGTGGATTATTACATCGACC	A2ML1	76.086	148	0.95081	2656.2	670.72	2.7769	0.99725	0.0027484	0.0054968	0.031453	TRUE	21	29	51	126
A2ML1_61352_TGGTCACTACCCCTATCAAG	A2ML1	232.48	226.3	-0.038719	19.115	2958.3	0.11368	0.45474	0.54526	0.90948	0.95644	FALSE	52	48	168	189
A3GALT2_59377_AAATAATGGGAGCCCCCCAG	A3GALT2	318.08	342.79	0.10762	305.48	4497.2	0.36852	0.64376	0.35624	0.71249	0.83898	TRUE	172	117	129	242
A3GALT2_59378_ACACGTAGTACATCACGCTC	A3GALT2	354.01	191.93	-0.87981	13438	5189.5	2.25	0.012225	0.98777	0.02445	0.094952	FALSE	77	88	258	113
A3GALT2_59379_AGAACATGAAGTGCGCCTCG	A3GALT2	1046.2	788.71	-0.40711	33309	22226	1.727	0.042086	0.95791	0.084171	0.22205	FALSE	205	193	785	633
A3GALT2_59380_GCGCTGGCAAGACGTGTCGA	A3GALT2	851.74	701.82	-0.27895	11264	16855	1.1548	0.12409	0.87591	0.24819	0.44813	FALSE	225	189	581	546
A4GALT_39715_AACGTGCCAGTAGATCATGA	A4GALT	324.42	227.26	-0.51165	4757.7	4617.5	1.4299	0.076372	0.92363	0.15274	0.32932	FALSE	98	97	209	141
A4GALT_39716_AGGCCAGGAACGCGCCGTTG	A4GALT	201.84	205.29	0.024373	5.9718	2449.9	0.069821	0.52782	0.47218	0.94436	0.97348	TRUE	47	45	144	170
A4GALT_39717_CCACATGAGTGCGATCCTGG	A4GALT	497.73	339.93	-0.54878	12563	8191.8	1.7435	0.040626	0.95937	0.081253	0.21676	FALSE	119	164	352	192
A4GALT_39718_GCCGCGTACCAGTCGGCCAG	A4GALT	101.45	104.08	0.036595	3.4635	981.6	0.084004	0.53319	0.46681	0.93362	0.96858	TRUE	31	26	65	83
A4GNT_37955_ACGGAACAGGAGACCAAATG	A4GNT	339.22	337.07	-0.009149	2.3127	4901.4	0.03072	0.48775	0.51225	0.97549	0.98819	FALSE	73	90	248	263
A4GNT_37956_CAGCCAAAAAGTTCTCCTCA	A4GNT	199.73	372.4	0.89548	15263	2415.8	3.5131	0.99978	0.0002215	0.00044299	0.004085	TRUE	113	104	76	286
A4GNT_37957_CAGCTCGGATGCATCCCGCC	A4GNT	331.82	422.05	0.34608	4085.3	4758.9	1.308	0.90456	0.095444	0.19089	0.38011	TRUE	69	80	245	362
A4GNT_37958_TGCATTCCCACAAAAAGGGG	A4GNT	464.97	508.94	0.13009	967.22	7477.1	0.50851	0.69445	0.30555	0.6111	0.76967	TRUE	98	73	342	460
AAAS_21269_CCCAGGGTGAGACAGCACTT	AAAS	115.19	224.39	0.95601	6125.5	1161.7	3.2041	0.99932	0.00067775	0.0013555	0.010358	TRUE	42	77	67	158
AAAS_21270_GCCAAGACAGAGGCACTAAG	AAAS	230.37	228.21	-0.013529	2.332	2922.5	0.039949	0.48406	0.51594	0.96812	0.98477	FALSE	49	57	169	182
AAAS_21271_GGCCCATCGACAGAGTGCCA	AAAS	83.483	63.021	-0.40012	210.38	758.29	0.74309	0.22778	0.77222	0.45555	0.64983	FALSE	27	34	52	32
AAAS_21272_TGACAGCGCCCTGATAGAGT	AAAS	66.575	47.743	-0.4713	178.54	562.25	0.79421	0.21157	0.78843	0.42314	0.62032	FALSE	22	25	41	25
AACS_48543_AGAGCTACGAGTATGTCTAC	AACS	245.17	494.62	1.0096	32051	3175.7	4.4266	1	4.7868e-06	9.5737e-06	0.00013679	TRUE	91	99	141	419
AACS_48544_CACATTCACACCGAAGTCCG	AACS	783.05	382.9	-1.0302	82567	15053	3.2615	0.00055417	0.99945	0.0011083	0.0087969	FALSE	180	144	561	257
AACS_48545_CATCCTCCTGTGCTACACCA	AACS	172.25	177.6	0.043909	14.333	1983.5	0.12022	0.54782	0.45218	0.90436	0.95385	TRUE	45	64	118	122
AACS_48546_CTTCTCACGTGTGTATGATG	AACS	246.22	211.98	-0.2151	587.13	3194	0.60592	0.27228	0.72772	0.54456	0.72138	FALSE	72	73	161	149
AADAC_21_AAGTCTGAAGCACTAAGAAG	AADAC	321.25	443.05	0.46255	7465.7	4557.3	1.8043	0.96441	0.035592	0.071185	0.19827	TRUE	101	100	203	364
AADAC_22_ATGTATATAATGCCTTAAGG	AADAC	247.28	369.53	0.57763	7547.5	3212.3	2.157	0.9845	0.015503	0.031007	0.11258	TRUE	107	119	127	268
AADAC_23_ATTTCTATCCAAATCACTCA	AADAC	171.19	169.01	-0.018407	2.3828	1967.3	0.049218	0.48034	0.51966	0.96069	0.98121	FALSE	65	46	97	131
AADAC_24_GGTATTTCTGGAGATAGTGC	AADAC	360.35	186.2	-0.94884	15570	5314.3	2.389	0.0084477	0.99155	0.016895	0.072818	FALSE	89	59	252	136
AADACL2_69621_AAAGAAAGTCAGAAACCCGA	AADACL2	129.98	86.892	-0.57554	937.61	1363.9	1.1667	0.12147	0.87853	0.24294	0.44259	FALSE	39	19	84	72
AADACL2_69622_GAAAAAATTTGACTGCAGCA	AADACL2	68.689	81.163	0.23757	77.941	585.94	0.51534	0.69615	0.30385	0.60769	0.76687	TRUE	23	37	42	48
AADACL2_69623_GTGATGTATTCATCTGAAAG	AADACL2	142.66	116.49	-0.2901	343.26	1543.5	0.66607	0.25258	0.74742	0.50516	0.69089	FALSE	61	55	74	67
AADACL2_69624_TGGGGGCAATTTAGCAACAG	AADACL2	81.37	127.95	0.64664	1098.7	732.99	1.7205	0.95728	0.042724	0.085448	0.2243	TRUE	58	60	19	74
AADACL3_59221_ACTTATGCTTAGGTAACTTG	AADACL3	199.73	296.96	0.5699	4773.6	2415.8	1.9783	0.97605	0.023947	0.047894	0.15184	TRUE	73	75	116	236
AADACL3_59222_CTGCGGTGACAGTTTCGGAG	AADACL3	71.859	80.208	0.15652	34.882	621.92	0.3348	0.63038	0.36962	0.73924	0.85615	TRUE	28	22	40	62
AADACL3_59223_GGCATCGTGTACTACCACGG	AADACL3	294.83	300.78	0.028719	17.69	4063.2	0.093313	0.53717	0.46283	0.92566	0.96476	TRUE	95	68	184	247
AADACL3_59224_TCGGGGTCATACTTTAGCGG	AADACL3	346.61	510.85	0.55824	13613	5044.9	2.3123	0.98962	0.010381	0.020762	0.084143	TRUE	139	109	189	426
AADACL4_69485_CAAGGTAGCAGGGATATCCG	AADACL4	329.71	322.74	-0.0307	24.241	4718.4	0.10137	0.45963	0.54037	0.91926	0.9613	FALSE	80	86	232	252
AADACL4_69486_GTAAACTCACCAAAGTGACC	AADACL4	113.07	122.22	0.11131	41.877	1133.5	0.27178	0.60695	0.39305	0.7861	0.88581	TRUE	42	30	65	98
AADACL4_69487_TAGAAGATGATGCCTCGCCG	AADACL4	151.11	223.44	0.56115	2640.1	1666.3	1.7717	0.96177	0.038226	0.076452	0.20793	TRUE	59	55	84	179
AADACL4_69488_TATCGTCCCAAAACGCAGGT	AADACL4	295.89	235.85	-0.32595	1808.1	4082.7	0.93964	0.1737	0.8263	0.3474	0.55162	FALSE	88	73	192	174
AADAT_38015_AGATCCATTTGTCCTTGACT	AADAT	137.38	143.23	0.059754	17.123	1468	0.15273	0.56062	0.43938	0.87876	0.9393	TRUE	68	93	62	57
AADAT_38016_ATTGATACTTACCCAGCACT	AADAT	478.71	364.76	-0.39127	6522.2	7774.8	1.2923	0.098122	0.90188	0.19624	0.38704	FALSE	162	135	291	247
AADAT_38017_GTAGCTGACATATTGAGCAG	AADAT	91.937	109.81	0.25375	160.01	861.57	0.60887	0.72846	0.27154	0.54308	0.72058	TRUE	46	47	41	68
AADAT_38018_TAATAATGTTGCAGCCCAGT	AADAT	168.02	370.49	1.1361	21275	1918.9	4.6219	1	1.9018e-06	3.8036e-06	5.8804e-05	TRUE	39	65	120	323
AAED1_64357_CATCTGCAAGGAATACGTAG	AAED1	91.937	192.88	1.0608	5265.6	861.57	3.439	0.99971	0.00029214	0.00058427	0.0051799	TRUE	15	38	72	164
AAED1_64358_GACATGTTATGTCTTACCTG	AAED1	227.2	164.24	-0.46578	1995.3	2868.9	1.1755	0.11988	0.88012	0.23976	0.43903	FALSE	63	81	152	91
AAED1_64359_GTCATCCTACCATCATATTG	AAED1	566.42	374.3	-0.59635	18650	9743.2	1.9463	0.025811	0.97419	0.051621	0.15977	FALSE	173	231	363	161
AAED1_64360_TCCCGGAACAGCGCGCCGAA	AAED1	524.15	224.39	-1.2203	46887	8780.2	3.199	0.00068952	0.99931	0.001379	0.010511	FALSE	86	112	410	123
AAGAB_49735_AGCAGACATCAATCTATGTG	AAGAB	341.33	872.74	1.3518	148700	4942.3	7.5591	1	2.0299e-14	4.0598e-14	1.4914e-12	TRUE	124	180	199	734
AAGAB_49736_CAAGAATGGTGCATCAAACA	AAGAB	99.334	212.93	1.0923	6681	954.59	3.6768	0.99988	0.00011818	0.00023635	0.0023917	TRUE	37	44	57	179
AAGAB_49737_CACTACATTGGACCACACAT	AAGAB	163.8	83.073	-0.97097	3350	1854.9	1.8743	0.030377	0.96962	0.060753	0.17844	FALSE	29	37	126	50
AAGAB_49738_GCCATGAGGAGACACTATCA	AAGAB	221.92	282.64	0.34755	1850.3	2780.3	1.1516	0.87525	0.12475	0.24949	0.44964	TRUE	91	81	119	215
AAK1_30987_CAAAACTCCTATTATCCACC	AAK1	141.6	149.91	0.0817	34.524	1528.3	0.21253	0.58409	0.41591	0.83181	0.91255	TRUE	56	41	78	116
AAK1_30988_CAAAAGGCCGGATATTTACC	AAK1	402.62	275	-0.54834	8217.1	6165.2	1.6254	0.052042	0.94796	0.10408	0.25565	FALSE	118	85	263	203
AAK1_30989_GGGTGCAATTGAAGTCTCTG	AAK1	86.653	92.621	0.095029	17.814	796.63	0.21145	0.58329	0.41671	0.83343	0.91355	TRUE	37	33	45	64
AAK1_30990_TGGCAAAATCATCACTACGA	AAK1	23.248	62.066	1.379	796.81	141.38	3.2647	0.99944	0.00056217	0.0011243	0.0089011	TRUE	10	8	12	57
AAMDC_36255_AAATTGCTTCCTTATCATGG	AAMDC	109.9	105.99	-0.051815	7.654	1091.5	0.11842	0.45263	0.54737	0.90525	0.95437	FALSE	12	9	92	102
AAMDC_36256_AAGTATGGCCAGGGGGTAGT	AAMDC	491.39	386.72	-0.34479	5497.5	8052.2	1.1664	0.12172	0.87828	0.24343	0.44308	FALSE	71	60	394	345
AAMDC_36257_AGGTACTCCACAGTTGATGA	AAMDC	232.48	180.47	-0.36361	1358.2	2958.3	0.95635	0.16944	0.83056	0.33888	0.54325	FALSE	76	69	144	120
AAMDC_36258_GATTGGCCGAGGGATGAGTG	AAMDC	299.06	305.56	0.030897	21.096	4141.3	0.10093	0.5402	0.4598	0.9196	0.96148	TRUE	103	104	180	216
AAMP_25_AAGATGACAAAGCCTTCGTA	AAMP	113.07	244.44	1.1054	8941.7	1133.5	3.902	0.99995	4.771e-05	9.542e-05	0.0010829	TRUE	40	35	67	221
AAMP_26_AGGTGACCTCGCTATCGTCG	AAMP	222.97	117.45	-0.91908	5708.3	2797.9	1.995	0.02301	0.97699	0.04602	0.14759	FALSE	81	64	130	59
AAMP_27_TGAGTGGCCTCTTGAAAGTG	AAMP	12.681	132.73	3.289	9202.6	64.384	14.961	1	7.0211e-51	1.4042e-50	1.8154e-48	TRUE	9	17	3	122
AAMP_28_TGGATGTGGAAAGTCCCGAA	AAMP	61.291	58.246	-0.072304	4.6366	504.13	0.13562	0.4443	0.5557	0.8886	0.94476	FALSE	39	27	19	34
AANAT_29_ACCTTCACGCTCGATCTCAA	AANAT	496.67	211.02	-1.231	42609	8168.5	3.1605	0.00078739	0.99921	0.0015748	0.011681	FALSE	71	53	399	168
AANAT_30_GCCCTCCTCGAACCAGCCCA	AANAT	1009.2	801.13	-0.33273	21718	21175	1.4298	0.07638	0.92362	0.15276	0.32935	FALSE	253	223	702	616
AANAT_31_GGTGAGGCAGCGAAACTCAC	AANAT	612.91	433.51	-0.49866	16214	10832	1.7238	0.042369	0.95763	0.084738	0.22304	FALSE	175	118	405	336
AANAT_32_GTGGCGCCGCTGACAGCTCG	AANAT	787.28	613.02	-0.36042	15242	15162	1.4152	0.078509	0.92149	0.15702	0.33525	FALSE	225	119	520	523
AAR2_34255_CATGTTCAGGATGACCACAG	AAR2	361.41	518.49	0.51948	12437	5335.2	2.1505	0.98424	0.015756	0.031512	0.11382	TRUE	127	129	215	414
AAR2_34256_CTTGGTTATCTCAGCTGGCG	AAR2	514.64	605.38	0.23387	4124.1	8567.2	0.9804	0.83656	0.16344	0.32689	0.53176	TRUE	166	141	321	493
AAR2_34257_GGGGTAGATTCTGCCCCACG	AAR2	529.43	544.27	0.039806	110.11	8899.2	0.1573	0.5625	0.4375	0.87501	0.93722	TRUE	229	198	272	372
AAR2_34258_TAAGGAAGAAACCCATACGA	AAR2	80.313	104.08	0.36993	283.61	720.43	0.88548	0.81179	0.18821	0.37642	0.57878	TRUE	46	46	30	63
AARD_73105_GCAGAGCTGGACGGGCGTTG	AARD	150.06	141.32	-0.085974	38.194	1650.8	0.21508	0.41479	0.58521	0.82957	0.91136	FALSE	39	50	103	98
AARD_73106_GGGAAATTCTCTCTCTGCAG	AARD	175.42	95.486	-0.87062	3267.4	2032.2	1.7732	0.038054	0.96195	0.076107	0.20733	FALSE	39	28	127	72
AARD_73107_GTCCCCGAAGAAGTCGCACG	AARD	393.11	438.28	0.15654	1020.9	5970.9	0.58456	0.72058	0.27942	0.55884	0.73191	TRUE	139	158	233	301
AARD_73108_TGCTGGAGGACCTCAGACGA	AARD	508.3	211.98	-1.2578	45934	8425.9	3.2281	0.00062304	0.99938	0.0012461	0.0096904	FALSE	78	53	403	169
AARS_33_CCAAGAAAAGCATTGACACA	AARS	161.68	428.73	1.4014	37694	1823.1	6.2543	1	1.9961e-10	3.9922e-10	1.0591e-08	TRUE	57	78	96	371
AARS_34_GGAGGCCAGATCTATGACGA	AARS	5.2837	231.08	5.2068	39269	20.959	49.32	1	0	0	0	TRUE	4	44	1	198
AARS_35_TCAGAATGTGCGTAGCTGTG	AARS	210.29	488.89	1.2132	40483	2587.7	5.4766	1	2.1674e-08	4.3348e-08	9.132e-07	TRUE	41	41	158	471
AARS_36_TTGGTGCTGAGGATGCCGAT	AARS	320.19	491.75	0.61742	14884	4537.2	2.5469	0.99457	0.0054338	0.010868	0.052666	TRUE	100	134	203	381
AARS2_45659_AGCAAACTGGGGTCGCCGCG	AARS2	73.972	68.75	-0.10417	13.642	646.2	0.20544	0.41756	0.58244	0.83512	0.91464	FALSE	9	19	61	53
AARS2_45660_CCAACTTCTACGCAGAACAG	AARS2	16.908	60.156	1.7719	1022.8	93.436	4.4741	1	3.9963e-06	7.9925e-06	0.00011613	TRUE	13	22	3	41
AARS2_45661_GCTGAGCCAGTTCAGAAGCA	AARS2	114.13	107.9	-0.080256	19.408	1147.6	0.1839	0.42683	0.57317	0.85366	0.9259	FALSE	22	52	86	61
AARS2_45662_TCGTAGTGGATCTCAGTACA	AARS2	243.05	396.27	0.70292	11911	3139.2	2.7346	0.99688	0.0031229	0.0062458	0.034675	TRUE	47	41	183	374
AARSD1_51303_ACCTCCGCTCCCAATCTACC	AARSD1	182.82	241.58	0.40018	1734.8	2147.2	1.2681	0.89762	0.10238	0.20476	0.39764	TRUE	84	47	89	206
AARSD1_51304_CATTCGGGTTGTTAACATCG	AARSD1	92.994	123.18	0.40176	457.75	874.71	1.0205	0.84614	0.15386	0.30773	0.51207	TRUE	40	46	48	83
AARSD1_51305_CCCAGACAGAAATATCAGGT	AARSD1	124.7	135.59	0.11991	59.363	1290.7	0.30322	0.61904	0.38096	0.76192	0.87068	TRUE	28	22	90	120
AARSD1_51306_GTGCTGAGAGTGACTCGCCG	AARSD1	264.19	197.66	-0.41674	2224.8	3508.9	1.1231	0.13068	0.86932	0.26137	0.4632	FALSE	65	53	185	154
AASDH_60113_AAATGAGTTGATAATGACGG	AASDH	708.02	676.04	-0.066586	511.45	13147	0.27891	0.39016	0.60984	0.78031	0.88179	FALSE	174	184	496	524
AASDH_60114_GACAGTCAGATCAAACGTCA	AASDH	15.851	65.885	1.9888	1397.1	85.935	5.3974	1	3.5356e-08	7.0711e-08	1.4429e-06	TRUE	9	35	6	34
AASDH_60115_TGTGAATTGCCTGTACAACT	AASDH	470.25	543.32	0.20794	2672.5	7591.2	0.83857	0.79914	0.20086	0.40171	0.60161	TRUE	144	112	301	457
AASDH_60116_TTGTTGGTACATCAGTACCT	AASDH	182.82	263.54	0.52522	3285.2	2147.2	1.7421	0.95925	0.040749	0.081497	0.21721	TRUE	76	68	97	208
AASDHPPT_46927_AGGAAAACCAGTTCTTGCAA	AASDHPPT	59.178	222.48	1.8929	14693	481.33	7.4435	1	4.9203e-14	9.8407e-14	3.533e-12	TRUE	20	22	36	211
AASDHPPT_46928_CCCGAGGAGAAGGAGCGCAT	AASDHPPT	26.419	44.878	0.74265	173.32	167.03	1.4283	0.9218	0.078201	0.1564	0.33432	TRUE	13	9	12	38
AASDHPPT_46929_CTGCCAGCAGCCATTCGGCT	AASDHPPT	538.94	825	0.61334	41374	9114.3	2.9963	0.99863	0.0013662	0.0027324	0.018168	TRUE	173	159	337	705
AASDHPPT_46930_GCTGAACCTGAGCTGCAAGT	AASDHPPT	160.63	190.97	0.24824	461.31	1807.3	0.71382	0.76231	0.23769	0.47538	0.66671	TRUE	41	63	111	137
AASS_27193_AAGACCTCAGAAAAGTGTAT	AASS	360.35	407.73	0.17773	1123.2	5314.3	0.64986	0.74211	0.25789	0.51579	0.69898	TRUE	129	93	212	334
AASS_27194_CATCACAAACAAAGTTAACA	AASS	163.8	116.49	-0.48811	1126.9	1854.9	1.0983	0.13597	0.86403	0.27194	0.47473	FALSE	65	74	90	48
AASS_27195_CGTGCTCAGTCACTTTCAAT	AASS	131.04	154.69	0.23771	280.15	1378.6	0.63697	0.73787	0.26213	0.52426	0.70563	TRUE	67	105	57	57
AASS_27196_GGGTAGTGGCATTTGGACAG	AASS	252.56	471.7	0.89858	24587	3304.3	3.8122	0.99993	6.8855e-05	0.00013771	0.0014932	TRUE	132	130	107	364
AATF_35171_AAACCACCTCTAGAAAAGCA	AATF	64.462	111.72	0.784	1137.4	538.81	2.0359	0.97906	0.02094	0.04188	0.13849	TRUE	32	22	29	95
AATF_35172_AGAAACTTTGACACTAGAGA	AATF	96.164	154.69	0.68016	1736.4	914.43	1.9353	0.9735	0.026495	0.05299	0.16266	TRUE	45	78	46	84
AATF_35173_AGGCACTTAAAGCATTGTTG	AATF	25.362	120.31	2.2022	5124.9	158.36	7.5451	1	2.3097e-14	4.6194e-14	1.693e-12	TRUE	1	6	23	120
AATF_35174_GAATATGATGAGGACGACCT	AATF	220.86	258.77	0.22757	719.58	2762.6	0.7212	0.7646	0.2354	0.47079	0.66307	TRUE	91	67	118	204
AATK_25397_AGCACCGGAACCACGCCCGG	AATK	910.92	610.16	-0.57736	45680	18448	2.2143	0.013403	0.9866	0.026805	0.10133	FALSE	214	196	648	443
AATK_25398_CTCCTCAAGTCCACAGACGT	AATK	768.26	506.08	-0.60126	34741	14672	2.1645	0.015213	0.98479	0.030426	0.11104	FALSE	193	191	534	339
AATK_25399_GCATAGCAACCTGCTCGTCG	AATK	211.35	159.46	-0.40421	1352.8	2605.1	1.0166	0.15465	0.84535	0.30931	0.51374	FALSE	48	50	152	117
AATK_25400_GTGTCAGCCAACAACAACAG	AATK	233.54	148	-0.6545	3705.5	2976.3	1.5679	0.058442	0.94156	0.11688	0.27569	FALSE	35	32	186	123
ABAT_37_CCTTAAAGACCATCTTCATG	ABAT	85.597	110.76	0.36807	318	783.79	0.89894	0.81545	0.18455	0.36909	0.57179	TRUE	52	47	29	69
ABAT_38_GAAAGAAGTCATCGGATGCG	ABAT	234.6	306.51	0.38431	2597.2	2994.3	1.3142	0.90561	0.094394	0.18879	0.37744	TRUE	124	75	98	246
ABAT_39_GTGAATGGCTTTAGAGTGCG	ABAT	416.36	363.8	-0.19418	1382.7	6448.6	0.65449	0.2564	0.7436	0.5128	0.69624	FALSE	114	101	280	280
ABAT_40_TGCAATTACGAAGAGAGCCG	ABAT	720.7	390.54	-0.88225	55763	13465	2.8453	0.0022182	0.99778	0.0044364	0.026672	FALSE	53	62	629	347
ABCA1_41_AATGCAGAGAAAGCTATCTG	ABCA1	274.75	330.38	0.26511	1550.5	3697.7	0.91479	0.81985	0.18015	0.3603	0.56361	TRUE	95	70	165	276
ABCA1_42_GGACACGCCCAGCTTCAAGT	ABCA1	485.05	189.06	-1.3546	46145	7913.1	3.3273	0.00043839	0.99956	0.00087679	0.0072775	FALSE	81	73	378	125
ABCA1_43_GTGGCATGGCAGGACTACGT	ABCA1	127.87	87.847	-0.53648	807.78	1334.5	1.0955	0.13645	0.86355	0.2729	0.47575	FALSE	57	61	64	31
ABCA1_44_TTGGACAGCCCAAGACATCG	ABCA1	289.55	252.08	-0.19917	702.69	3966.2	0.59491	0.27595	0.72405	0.5519	0.72715	FALSE	83	128	191	136
ABCA10_27825_ACTCTCTGAAATAACTGACA	ABCA10	242	293.14	0.27558	1311	3121	0.91553	0.82004	0.17996	0.35992	0.56317	TRUE	77	82	152	225
ABCA10_27826_GACACTTCAGTGAATGCACG	ABCA10	1207.9	717.1	-0.7514	122450	26971	2.9883	0.0014028	0.9986	0.0028055	0.018566	FALSE	197	160	946	591
ABCA10_27827_GGGTACTGAAGAGGATAAGT	ABCA10	98.278	199.57	1.0145	5287	941.15	3.3016	0.99952	0.00048096	0.00096192	0.0078445	TRUE	18	28	75	181
ABCA10_27828_TCCTTATTAAAACACTCATG	ABCA10	156.4	231.08	0.56017	2814.7	1744.3	1.7881	0.96311	0.036887	0.073774	0.20308	TRUE	79	40	69	202
ABCA12_34679_ACGGTCATATAATACACAAG	ABCA12	96.164	111.72	0.21423	121.14	914.43	0.51438	0.69628	0.30372	0.60744	0.76669	TRUE	30	43	61	74
ABCA12_34680_ATGGTGCTAAATGATCCTTG	ABCA12	287.44	217.71	-0.39924	2442.6	3927.5	1.1126	0.13293	0.86707	0.26587	0.46836	FALSE	90	72	182	156
ABCA12_34681_GAGGTGATACCCATCGCCAA	ABCA12	154.29	153.73	-0.0051452	0.15281	1713	0.013357	0.49462	0.50538	0.98925	0.99491	FALSE	31	49	115	112
ABCA12_34682_GGCAGCTATAAATACAACCC	ABCA12	199.73	136.54	-0.54532	2013.8	2415.8	1.2854	0.099298	0.9007	0.1986	0.39003	FALSE	90	85	99	58
ABCA13_62905_ACAATTTAGCTGATTCGGCG	ABCA13	354.01	400.09	0.17605	1062.5	5189.5	0.6396	0.73878	0.26122	0.52243	0.704	TRUE	116	129	219	290
ABCA13_62906_CAATGACTTCCATAATTGGG	ABCA13	747.12	562.41	-0.40908	17144	14132	1.5538	0.06012	0.93988	0.12024	0.28095	FALSE	171	207	536	382
ABCA13_62907_GGCTTCATTTAATAACACTG	ABCA13	85.597	47.743	-0.82912	731.45	783.79	1.3521	0.087154	0.91285	0.17431	0.35821	FALSE	67	28	14	22
ABCA13_62908_TATCAGGAAGACTTGCGAAG	ABCA13	682.66	669.36	-0.028349	88.483	12518	0.1189	0.45268	0.54732	0.90536	0.95437	FALSE	246	237	400	464
ABCA2_45_CATGTACGTGGCGATCCGAG	ABCA2	935.22	562.41	-0.73266	70605	19114	2.6966	0.0035026	0.9965	0.0070051	0.037798	FALSE	106	126	779	463
ABCA2_46_CTTGTGTGGCAACAACCGGT	ABCA2	66.575	80.208	0.26513	93.131	562.25	0.57495	0.71663	0.28337	0.56674	0.73875	TRUE	39	38	24	46
ABCA2_47_GATGTCGTGCCCGTAGATGG	ABCA2	340.27	209.11	-0.69975	8727.4	4921.8	1.8695	0.030773	0.96923	0.061547	0.17993	FALSE	61	51	261	168
ABCA2_48_TAGGGGATGAAATTGCCACG	ABCA2	209.24	361.89	0.78753	11868	2570.4	3.011	0.9987	0.0013019	0.0026038	0.017476	TRUE	83	81	115	298
ABCA3_49_AATGCGCATTTACTGACCGA	ABCA3	718.59	845.05	0.23357	8009.4	13412	1.092	0.86258	0.13742	0.27483	0.4779	TRUE	146	230	534	655
ABCA3_50_ACCTACGGTTCAGTTACACA	ABCA3	164.85	194.79	0.23941	448.94	1870.9	0.69217	0.75557	0.24443	0.48887	0.67796	TRUE	52	76	104	128
ABCA3_51_AGTGGACGGGCATACATCAG	ABCA3	586.5	630.21	0.10354	955.68	10209	0.43261	0.66735	0.33265	0.6653	0.80764	TRUE	205	241	350	419
ABCA3_52_CCTCCTGAGTCCCGTCAACG	ABCA3	161.68	243.49	0.58771	3381	1823.1	1.9159	0.97231	0.027689	0.055379	0.16757	TRUE	43	54	110	201
ABCA4_61_AAAGACCGAGCCCCTAACAG	ABCA4	162.74	266.41	0.70763	5454.1	1839	2.4174	0.99218	0.0078168	0.015634	0.068765	TRUE	60	51	94	228
ABCA4_62_AGCACCATACCCGCAAACAG	ABCA4	47.554	78.298	0.70771	479.87	360.88	1.6184	0.94689	0.053114	0.10623	0.25917	TRUE	41	29	4	53
ABCA4_63_AGGGTGTTGAGTTGCCACAG	ABCA4	145.83	107.9	-0.43117	723.48	1589.3	0.95149	0.17057	0.82943	0.34114	0.54544	FALSE	54	35	84	78
ABCA4_64_GATCCGAATGGACATAGACG	ABCA4	77.143	142.27	0.8746	2169.9	683.06	2.4921	0.99364	0.0063601	0.01272	0.059113	TRUE	49	37	24	112
ABCA5_32859_AAAATGAATGATACCTCAGG	ABCA5	140.55	242.53	0.78284	5296.1	1513.2	2.6218	0.99563	0.0043741	0.0087482	0.044839	TRUE	38	23	95	231
ABCA5_32860_AAATTATGAGGAGTTATCAG	ABCA5	155.34	76.389	-1.0145	3212.7	1728.6	1.899	0.028693	0.97131	0.057386	0.17168	FALSE	53	42	94	38
ABCA5_32861_GAAATAGATACCTTTCCCCG	ABCA5	131.04	43.924	-1.5554	4063.4	1378.6	2.3462	0.0092772	0.99072	0.018554	0.077799	FALSE	43	41	81	5
ABCA5_32862_TGACAGTGACTATGTATCCG	ABCA5	69.745	95.486	0.44768	333.32	597.87	1.0527	0.85345	0.14655	0.2931	0.49763	TRUE	42	26	24	74
ABCA6_32855_AACCAATCACCCTGTGATGG	ABCA6	587.55	561.46	-0.065426	340.5	10234	0.25794	0.39823	0.60177	0.79645	0.89218	FALSE	172	174	384	414
ABCA6_32856_CAGACAGCTGTGAGTGACAT	ABCA6	917.26	748.61	-0.29276	14258	18621	1.2359	0.10825	0.89175	0.2165	0.41168	FALSE	189	209	679	575
ABCA6_32857_GGCACCAAATAAAACACACA	ABCA6	255.73	233.94	-0.12797	237.57	3359.8	0.37597	0.35347	0.64653	0.70693	0.8354	FALSE	54	24	188	221
ABCA6_32858_TTGTATATGAGTCTCCTGAA	ABCA6	169.08	370.49	1.1271	21042	1935	4.5786	1	2.3409e-06	4.6818e-06	7.13e-05	TRUE	74	50	86	338
ABCA7_27821_AGTACGGGATCCCTGAACCA	ABCA7	674.21	753.38	0.15997	3137.1	12311	0.71362	0.76227	0.23773	0.47546	0.6668	TRUE	210	187	428	602
ABCA7_27822_CTGGCCTAGACGTAACCCTA	ABCA7	450.17	203.39	-1.1424	31622	7159.9	2.9166	0.0017695	0.99823	0.0035389	0.022298	FALSE	80	79	346	134
ABCA7_27823_TCAAACAGCACGTTGTACTG	ABCA7	336.05	257.81	-0.38104	3073.6	4840.2	1.1245	0.1304	0.8696	0.26079	0.46254	FALSE	41	73	277	197
ABCA7_27824_TGGACATTGACGTGGTCACG	ABCA7	486.1	336.11	-0.53101	11344	7936.3	1.6837	0.04612	0.95388	0.09224	0.23565	FALSE	97	101	363	251
ABCA8_27833_AAATTATCAGCCAAAAGCGA	ABCA8	56.008	47.743	-0.22596	34.207	447.64	0.39063	0.34538	0.65462	0.69076	0.82485	FALSE	32	26	21	24
ABCA8_27834_CTGTTAATGTCACAAGAGAG	ABCA8	291.66	189.06	-0.62277	5324.7	4004.9	1.6213	0.052479	0.94752	0.10496	0.25706	FALSE	99	107	177	91
ABCA8_27835_GACACCCCCAAAAGACAGTG	ABCA8	250.45	294.1	0.23092	954.08	3267.4	0.76359	0.77744	0.22256	0.44512	0.6406	TRUE	74	54	163	254
ABCA8_27836_GCAAATCTGCGCAATTGCAA	ABCA8	143.72	42.969	-1.7187	5509.8	1558.7	2.5519	0.0052221	0.99478	0.010444	0.051167	FALSE	44	17	92	28
ABCA9_27829_ATATCAGAAAAGTTACCCGT	ABCA9	103.56	134.64	0.37538	484.86	1008.8	0.97834	0.83596	0.16404	0.32809	0.53289	TRUE	6	20	92	121
ABCA9_27830_CTTGATAGATGTTCTAACCA	ABCA9	107.79	141.32	0.38761	564.73	1063.8	1.0281	0.84797	0.15203	0.30406	0.50833	TRUE	64	52	38	96
ABCA9_27831_TGGCAGGAAGAACAATCATG	ABCA9	330.76	347.57	0.071295	141.26	4738.6	0.24415	0.59644	0.40356	0.80711	0.89885	TRUE	137	95	176	269
ABCA9_27832_TTATTTCTAACTAGACAGGA	ABCA9	146.89	84.028	-0.7985	2013.7	1604.6	1.5692	0.05818	0.94182	0.11636	0.27494	FALSE	37	36	102	52
ABCB1_13833_ATTGACAGCTATTCGAAGAG	ABCB1	723.87	514.67	-0.49128	22041	13544	1.7976	0.036121	0.96388	0.072242	0.20041	FALSE	232	299	453	240
ABCB1_13834_CTGGAGAGATCCTCACCAAG	ABCB1	215.58	182.38	-0.24006	552.03	2674.8	0.64191	0.26046	0.73954	0.52091	0.70328	FALSE	42	53	162	138
ABCB1_13835_TAGGTGATATCAATGATACA	ABCB1	543.17	444.96	-0.28712	4834	9210.3	1.0233	0.15309	0.84691	0.30618	0.51043	FALSE	121	100	393	366
ABCB1_13836_TTTATAGTAGGATTTACACG	ABCB1	264.19	183.33	-0.5247	3295.8	3508.9	1.3649	0.086132	0.91387	0.17226	0.35553	FALSE	70	57	180	135
ABCB10_32847_ACAGCAATGATTGACACTGG	ABCB10	520.98	594.88	0.19103	2733.7	8709.1	0.79189	0.78579	0.21421	0.42843	0.62531	TRUE	179	116	314	507
ABCB10_32848_CTCAGTGCCGTGTTTCTGTG	ABCB10	393.11	422.05	0.10222	418.83	5970.9	0.37449	0.64598	0.35402	0.70804	0.83611	TRUE	184	161	188	281
ABCB10_32849_GAGTTCACCCACGGTCATGT	ABCB10	559.02	528.99	-0.079506	450.91	9572.8	0.3069	0.37946	0.62054	0.75892	0.86883	FALSE	153	119	376	435
ABCB10_32850_TATCGCCGTTCACTGGCCTG	ABCB10	1294.5	997.83	-0.37522	44198	29610	1.7242	0.042338	0.95766	0.084675	0.22292	FALSE	252	239	973	806
ABCB11_22553_GAGCTCCCCAGATTTAGCAA	ABCB11	145.83	127	-0.19806	177.59	1589.3	0.47246	0.31821	0.68179	0.63643	0.7877	FALSE	58	31	80	102
ABCB11_22554_GATTCTTTACTGGATTCGTG	ABCB11	512.52	486.02	-0.076437	351.17	8520	0.28709	0.38702	0.61298	0.77405	0.878	FALSE	192	163	293	346
ABCB11_22555_TCAACATGGTCATTAAACCA	ABCB11	1024	572.92	-0.8367	103850	21594	3.0696	0.0010718	0.99893	0.0021435	0.014945	FALSE	157	137	812	463
ABCB11_22556_TTTCAGAATCCTCCTAACTG	ABCB11	315.97	447.83	0.50183	8759.5	4457.3	1.9751	0.97587	0.02413	0.04826	0.15264	TRUE	114	113	185	356
ABCB4_13837_ACACCACTGAACTCAATACG	ABCB4	513.58	389.58	-0.39777	7724.2	8543.6	1.3415	0.089879	0.91012	0.17976	0.36546	FALSE	126	132	360	276
ABCB4_13838_CATTTCGGACCGTAGACAGT	ABCB4	454.4	221.53	-1.0332	27971	7250.2	2.7349	0.0031196	0.99688	0.0062392	0.034653	FALSE	87	76	343	156
ABCB4_13839_CCCTTCTCGAGCTAACGTCA	ABCB4	123.64	211.98	0.77295	3971.9	1276.2	2.4728	0.9933	0.0067047	0.013409	0.0615	TRUE	29	47	88	175
ABCB4_13840_TGGCCGTGGAAATGTAACCA	ABCB4	161.68	184.29	0.18771	255.78	1823.1	0.52942	0.70172	0.29828	0.59656	0.7588	TRUE	31	27	122	166
ABCB5_69133_AGACGTGGATAGAGTCACTA	ABCB5	13.738	5.7292	-1.131	33.521	71.401	0.94777	0.12619	0.87381	0.25237	0.45308	FALSE	0	6	13	0
ABCB5_69134_CAAAGGTCGGACTACAATCG	ABCB5	990.17	963.45	-0.039425	356.99	20640	0.18598	0.42623	0.57377	0.85246	0.92545	FALSE	288	273	649	736
ABCB5_69135_GAAACCTTCGCAATAGCCCG	ABCB5	399.45	554.77	0.47287	12144	6100.2	1.9887	0.97663	0.023369	0.046738	0.14922	TRUE	151	155	227	426
ABCB5_69136_TTTGGATTGGCAGATCATGG	ABCB5	306.46	179.51	-0.76828	8199.5	4278.8	1.9407	0.026148	0.97385	0.052297	0.16126	FALSE	69	85	221	103
ABCB6_26865_CGAAGTGGAACGCTATCGAG	ABCB6	395.22	256.86	-0.61974	9682.8	6013.9	1.7842	0.037193	0.96281	0.074386	0.20428	FALSE	66	57	308	212
ABCB6_26866_GCACGTAGGGAGAGATGCGA	ABCB6	196.56	214.84	0.12773	167.31	2364.8	0.37607	0.64656	0.35344	0.70688	0.8354	TRUE	103	75	83	150
ABCB6_26867_GGAACGGGCACTCAATGTGT	ABCB6	210.29	114.58	-0.87031	4684	2587.7	1.8815	0.029937	0.97006	0.059874	0.17668	FALSE	40	31	159	89
ABCB6_26868_TAGGTGCCAAACCAATTGAG	ABCB6	969.04	689.41	-0.49059	39378	20049	1.9749	0.024142	0.97586	0.048285	0.1527	FALSE	273	231	644	491
ABCB7_53_AGTCATTAAAAAGTATCACA	ABCB7	71.859	46.788	-0.60845	317.85	621.92	1.0053	0.1557	0.8443	0.31141	0.51612	FALSE	2	4	66	45
ABCB7_54_CACACCACAGACAGCTACCG	ABCB7	16.908	127.95	2.8482	7503	93.436	11.488	1	7.9206e-31	1.5841e-30	1.2886e-28	TRUE	8	5	8	129
ABCB7_55_GATTAAATACCAAAGCACTC	ABCB7	205.01	273.09	0.41194	2329.4	2501.4	1.3612	0.91328	0.086721	0.17344	0.35708	TRUE	38	40	156	246
ABCB7_56_TCACAGTTGCAGTCACACGG	ABCB7	21.135	48.698	1.1669	395.83	124.87	2.4666	0.99297	0.0070263	0.014053	0.063595	TRUE	0	0	20	51
ABCB8_30439_AAGTACACAAGGGACCACGT	ABCB8	507.24	296.96	-0.77038	22500	8402.4	2.294	0.010896	0.9891	0.021791	0.087233	FALSE	78	73	402	238
ABCB8_30440_CCTGCCCAAACAGGACAGAG	ABCB8	264.19	288.37	0.12589	292.49	3508.9	0.40821	0.65844	0.34156	0.68312	0.82004	TRUE	98	120	152	182
ABCB8_30441_CTTGGAACAAGGCGATGCCG	ABCB8	441.72	457.38	0.05014	122.58	6980.3	0.1874	0.57433	0.42567	0.85135	0.92472	TRUE	91	75	327	404
ABCB8_30442_TCTTTGACGCCAATAAGACA	ABCB8	122.58	92.621	-0.40057	451.03	1261.8	0.84348	0.19926	0.80074	0.39851	0.59883	FALSE	30	14	86	83
ABCB9_32851_GCCCCAGACGTAGTACATGT	ABCB9	82.426	39.149	-1.0551	968.05	745.61	1.5849	0.055295	0.9447	0.11059	0.26606	FALSE	23	41	55	0
ABCB9_32852_TGGACACCATCATGATGATG	ABCB9	210.29	380.99	0.85429	14885	2587.7	3.3556	0.9996	0.00039604	0.00079207	0.006684	TRUE	66	76	133	323
ABCB9_32853_TGTCCTGGGAGATTGTATGG	ABCB9	141.6	127	-0.15591	106.77	1528.3	0.37366	0.35423	0.64577	0.70847	0.83639	FALSE	42	45	92	88
ABCB9_32854_TTTGCCGCAGGTATTCGGGG	ABCB9	117.3	429.69	1.8642	53589	1190.1	9.0554	1	6.8066e-20	1.3613e-19	7.2257e-18	TRUE	52	85	59	365
ABCC1_11741_AAAATGTGATTGGCCCCAAG	ABCC1	471.31	507.03	0.10518	638.2	7614.1	0.40937	0.65886	0.34114	0.68227	0.81955	TRUE	160	175	286	356
ABCC1_11742_AACCTGACAGCATCGAGCGA	ABCC1	541.06	913.8	0.75502	70648	9162.3	3.8941	0.99995	4.9275e-05	9.855e-05	0.0011143	TRUE	176	202	336	755
ABCC1_11743_AGTACACGGAAAGCTTGACC	ABCC1	115.19	141.32	0.2927	342.37	1161.7	0.76675	0.7783	0.2217	0.44339	0.63896	TRUE	57	54	52	94
ABCC1_11744_TCTGCTTCGTCAGTGGCATG	ABCC1	705.91	765.8	0.11732	1794.1	13094	0.52337	0.69964	0.30036	0.60072	0.76184	TRUE	154	175	514	627
ABCC10_55151_AAGGGTGTCACCCTTAGCGG	ABCC10	120.47	93.576	-0.36104	363.05	1233	0.76589	0.22164	0.77836	0.44327	0.63889	FALSE	42	29	72	69
ABCC10_55152_CAAGATGAGACCACCCACGA	ABCC10	320.19	192.88	-0.72827	8232.9	4537.2	1.8901	0.029373	0.97063	0.058747	0.17442	FALSE	52	46	251	156
ABCC10_55153_CGTGTACCAAGCTTACTGGA	ABCC10	136.32	130.82	-0.059024	15.153	1453	0.14441	0.44249	0.55751	0.88498	0.94283	FALSE	55	54	74	83
ABCC10_55154_GGGCCCTGAGAATCCCAACA	ABCC10	48.61	75.434	0.62357	364.04	371.47	1.3917	0.91752	0.082484	0.16497	0.34609	TRUE	24	20	22	59
ABCC11_54807_AATACACATCACCTCAGGAG	ABCC11	246.22	189.06	-0.37934	1640.7	3194	1.0114	0.1559	0.8441	0.31181	0.51644	FALSE	72	86	161	112
ABCC11_54808_CAAAGACCAGAGCTTTGCTG	ABCC11	298	421.09	0.4974	7631.9	4121.7	1.9173	0.9724	0.027601	0.055203	0.1672	TRUE	94	139	188	302
ABCC11_54809_GACGGTCGGAATAGACGGCG	ABCC11	312.8	395.31	0.3368	3415.9	4397.6	1.2443	0.8933	0.1067	0.21339	0.40803	TRUE	116	111	180	303
ABCC11_54810_TAAGCTTTGGATCATGAGCG	ABCC11	292.72	244.44	-0.25904	1167.6	4024.3	0.76099	0.22333	0.77667	0.44666	0.6417	FALSE	85	94	192	162
ABCC12_56725_AAAGACCATTAGGATCGGGA	ABCC12	497.73	332.29	-0.58147	13823	8191.8	1.8279	0.033785	0.96621	0.06757	0.19141	FALSE	113	122	358	226
ABCC12_56726_ACGTACATTAAGGCTTCTGG	ABCC12	350.84	265.45	-0.40105	3663.3	5127.4	1.1925	0.11653	0.88347	0.23307	0.43111	FALSE	80	107	252	171
ABCC12_56727_GAGTCATATGTCGACAATGG	ABCC12	301.17	465.02	0.62501	13579	4180.4	2.5341	0.99436	0.0056373	0.011275	0.054097	TRUE	107	113	178	374
ABCC12_56728_GCCAACCCAGACTTTCCCAG	ABCC12	298	314.15	0.075873	130.37	4121.7	0.25149	0.59928	0.40072	0.80144	0.89553	TRUE	119	104	163	225
ABCC2_3481_CAGAATTCATCACAAACGCA	ABCC2	324.42	105.03	-1.6178	25879	4617.5	3.2285	0.0006212	0.99938	0.0012424	0.0096706	FALSE	33	41	274	69
ABCC2_3482_CAGGGTATAAATCTTAGTGG	ABCC2	94.051	73.524	-0.35099	211.46	887.9	0.68886	0.24485	0.75515	0.48971	0.67882	FALSE	40	8	49	69
ABCC2_3483_CATTATGGCAGGCCAACTTG	ABCC2	453.34	320.83	-0.49748	8845	7227.6	1.5587	0.059535	0.94046	0.11907	0.27912	FALSE	53	59	376	277
ABCC2_3484_GATTGGTATATCGAACAGCA	ABCC2	27.475	41.059	0.56269	93.175	175.81	1.0244	0.84421	0.15579	0.31158	0.51621	TRUE	22	18	4	25
ABCC3_22761_CCACGTACACGTACACCCAG	ABCC3	429.04	384.81	-0.15659	978.93	6713.1	0.53984	0.29465	0.70535	0.5893	0.75295	FALSE	103	83	303	320
ABCC3_22762_GCAGGGCGTACAGTCTTCGG	ABCC3	524.15	507.99	-0.045097	130.61	8780.2	0.17248	0.43153	0.56847	0.86306	0.93114	FALSE	100	99	396	433
ABCC3_22763_GGCCACATGAGAGTCCACCG	ABCC3	514.64	338.98	-0.60092	15595	8567.2	1.8978	0.028859	0.97114	0.057719	0.17239	FALSE	81	97	406	258
ABCC3_22764_TGAACCACCAGAAAAACAGG	ABCC3	34.873	75.434	1.0913	852.35	240.17	2.6173	0.99551	0.0044866	0.0089731	0.045674	TRUE	16	16	17	63
ABCC4_27541_AAGCACGGGTAAACCTTGCA	ABCC4	475.54	478.38	0.0085966	4.0557	7705.8	0.032444	0.51294	0.48706	0.97412	0.98755	TRUE	158	196	292	305
ABCC4_27542_CAGATTGACTATCTGGCCTG	ABCC4	195.5	296.01	0.59598	5104.8	2347.9	2.0743	0.98097	0.019028	0.038057	0.12961	TRUE	78	74	107	236
ABCC4_27543_GAAGGTACGATTCCTTAGTG	ABCC4	184.93	175.69	-0.073512	42.666	2180.3	0.19782	0.42157	0.57843	0.84315	0.91975	FALSE	38	36	137	148
ABCC4_27544_GCGTCACTGCCACGAACACG	ABCC4	407.9	221.53	-0.87778	17766	6273.8	2.353	0.0093104	0.99069	0.018621	0.077959	FALSE	82	56	304	176
ABCC5_26861_TACGGAAAGAGGCACCCATG	ABCC5	627.71	591.06	-0.086652	671.77	11184	0.34656	0.36446	0.63554	0.72892	0.84943	FALSE	136	120	458	499
ABCC5_26862_TGAAAAGGGCCATAATAACC	ABCC5	515.69	288.37	-0.8364	26376	8590.8	2.4526	0.0070908	0.99291	0.014182	0.064022	FALSE	77	41	411	261
ABCC5_26863_TGTTAAGACTAGAGAGACTG	ABCC5	319.14	269.27	-0.24429	1245.6	4517.2	0.74196	0.22905	0.77095	0.45811	0.65249	FALSE	82	99	220	183
ABCC5_26864_TTTATTCATAGAAATCCGCG	ABCC5	110.96	163.28	0.5532	1381.5	1105.5	1.5737	0.94219	0.057806	0.11561	0.27365	TRUE	30	45	75	126
ABCC6_1053_ACTATGATCCAATCAGCCTG	ABCC6	354.01	434.46	0.29468	3244.6	5189.5	1.1168	0.86795	0.13205	0.26409	0.46625	TRUE	113	92	222	363
ABCC6_1054_CAGACCACGATCCAGACGAG	ABCC6	173.31	232.03	0.41889	1733.4	1999.7	1.3132	0.90544	0.09456	0.18912	0.37792	TRUE	81	121	83	122
ABCC6_1055_GAGAACTGTGAGAGTCACAA	ABCC6	84.54	143.23	0.75369	1751.7	771.01	2.1136	0.98271	0.017294	0.034588	0.12142	TRUE	36	32	44	118
ABCC6_1056_GGACAGCATCCAATACGGCA	ABCC6	138.43	92.621	-0.57467	1059.9	1483	1.1896	0.11695	0.88305	0.2339	0.43199	FALSE	55	42	76	55
ABCC8_18509_CAGACCAACGAGATGCTCCG	ABCC8	229.31	78.298	-1.5382	12187	2904.6	2.8021	0.0025284	0.99747	0.0050568	0.029533	FALSE	53	33	164	49
ABCC8_18510_CTACCGTCAAAGCTCTAGTG	ABCC8	191.27	169.97	-0.16944	227.18	2280.5	0.44617	0.32772	0.67228	0.65544	0.80102	FALSE	44	52	137	126
ABCC8_18511_GATGTTGTGATAGTAGACCA	ABCC8	417.42	237.76	-0.80937	16453	6470.5	2.2334	0.012761	0.98724	0.025521	0.09784	FALSE	67	73	328	176
ABCC8_18512_TCAACGCCAGCGAATCAGTG	ABCC8	496.67	224.39	-1.1428	38492	8168.5	3.0126	0.001295	0.99871	0.00259	0.017403	FALSE	100	80	370	155
ABCC9_26873_AGAGAGGAAAACTCTCCGAC	ABCC9	159.57	316.06	0.98156	12595	1791.5	3.6972	0.99989	0.00010899	0.00021797	0.0022304	TRUE	69	83	82	248
ABCC9_26874_ATACACTATCGATGTTGTAG	ABCC9	410.02	585.33	0.51251	15488	6317.4	2.2057	0.9863	0.013704	0.027407	0.10295	TRUE	131	129	257	484
ABCC9_26875_GACTGCAAATCTGACCACCG	ABCC9	349.78	169.01	-1.045	16868	5106.8	2.5297	0.0057082	0.99429	0.011416	0.054597	FALSE	48	42	283	135
ABCC9_26876_TAAAGTACTGAATTGGCGCA	ABCC9	480.82	765.8	0.67035	41151	7820.8	3.2224	0.99936	0.00063553	0.0012711	0.0098472	TRUE	172	168	283	634
ABCD1_597_AGTTCCTCATGAAGTATGTG	ABCD1	313.85	354.25	0.17416	816.78	4417.5	0.60783	0.72835	0.27165	0.5433	0.72067	TRUE	170	151	127	220
ABCD1_598_CTACATGCACTCGCGTGTGG	ABCD1	507.24	516.58	0.026272	43.618	8402.4	0.10189	0.54058	0.45942	0.91884	0.96109	TRUE	153	171	327	370
ABCD1_599_GATCATGTCGTCGTACAAGG	ABCD1	327.59	396.27	0.27381	2363.4	4678	1.0041	0.84233	0.15767	0.31534	0.51997	TRUE	85	114	225	301
ABCD1_600_GGCCACATACACCGACAGGA	ABCD1	177.53	306.51	0.78444	8470.4	2064.9	2.8383	0.99773	0.0022678	0.0045355	0.027131	TRUE	94	46	74	275
ABCD2_637_ATTACCTCTCAGTGACACAT	ABCD2	218.75	333.25	0.60507	6627	2727.4	2.1924	0.98583	0.014174	0.028348	0.10545	TRUE	99	81	108	268
ABCD2_638_CCCTGACCAATCTCTTACGG	ABCD2	256.79	493.66	0.94025	28790	3378.3	4.0754	0.99998	2.2973e-05	4.5945e-05	0.00056801	TRUE	27	52	216	465
ABCD2_639_CCTTATTGCACTGTTGACGA	ABCD2	210.29	309.37	0.55477	4954	2587.7	1.9478	0.97428	0.025723	0.051445	0.15944	TRUE	102	126	97	198
ABCD2_640_CTGGAGCTGATGCTATTGAA	ABCD2	504.07	349.48	-0.52715	12049	8332.1	1.6936	0.045172	0.95483	0.090345	0.23252	FALSE	201	153	276	213
ABCD3_15573_AATTAAACTTACAAGAGGCA	ABCD3	99.334	102.17	0.040208	4.0207	954.59	0.091779	0.53626	0.46374	0.92748	0.96569	TRUE	52	52	42	55
ABCD3_15574_ACTCGACTTCGAAGACCCAT	ABCD3	246.22	359.98	0.54612	6528.6	3194	2.0129	0.97794	0.022062	0.044124	0.14342	TRUE	91	142	142	235
ABCD3_15575_TGGCAAATATGAGCGCACAA	ABCD3	103.56	74.479	-0.4702	425.74	1008.8	0.91564	0.17947	0.82053	0.35894	0.5622	FALSE	50	55	48	23
ABCD3_15576_TGTGTACTCTTGAGATGTCG	ABCD3	156.4	265.45	0.75945	6048.9	1744.3	2.6111	0.99549	0.0045128	0.0090256	0.04586	TRUE	58	75	90	203
ABCD4_15577_AGCCACATCTGAGAGCGTCG	ABCD4	208.18	124.13	-0.74129	3590.3	2553.1	1.6634	0.0481	0.9519	0.096201	0.24241	FALSE	41	35	156	95
ABCD4_15578_GATCCCCAGTCAGTACTATG	ABCD4	252.56	250.17	-0.01366	2.855	3304.3	0.04157	0.48342	0.51658	0.96684	0.98405	FALSE	63	59	176	203
ABCD4_15579_GTAGTAGACGAGGGTGAACG	ABCD4	460.74	333.25	-0.46618	8180.7	7386.1	1.4835	0.06897	0.93103	0.13794	0.30851	FALSE	115	96	321	253
ABCD4_15580_TTGCGATGACAACGTAACTC	ABCD4	862.31	399.13	-1.1094	111150	17136	3.5382	0.00020142	0.9998	0.00040283	0.0037704	FALSE	156	136	660	282
ABCE1_16225_AGTTGTCCTGTAGTTCGAAT	ABCE1	107.79	122.22	0.17974	104.27	1063.8	0.44254	0.67079	0.32921	0.65841	0.80314	TRUE	36	34	66	94
ABCE1_16226_CAATTGATAAGGCGCCAAAG	ABCE1	128.92	303.65	1.2295	15942	1349.2	4.7568	1	9.8369e-07	1.9674e-06	3.2238e-05	TRUE	48	57	74	261
ABCE1_16227_CCAAAACTTCACCTGGACGA	ABCE1	14.794	18.142	0.27735	5.6185	78.587	0.37765	0.62953	0.37047	0.74094	0.85722	TRUE	4	6	10	13
ABCE1_16228_TTTCAGATATATCATTGTGG	ABCE1	19.021	41.059	1.0709	251.53	108.88	2.112	0.98204	0.017957	0.035914	0.12456	TRUE	13	15	5	28
ABCF1_57_CTGCAGAGGCCAAAGCACGG	ABCF1	39.1	196.7	2.3017	14239	279.05	9.4345	1	1.9832e-21	3.9664e-21	2.2536e-19	TRUE	11	3	26	203
ABCF1_58_GATGGAGTATGAGCGCCAAG	ABCF1	179.65	272.13	0.59644	4322.7	2097.7	2.0193	0.97827	0.021726	0.043453	0.1419	TRUE	64	28	106	257
ABCF1_59_GCAACACATCAATGTTGGGA	ABCF1	95.107	160.42	0.74807	2168.6	901.14	2.1756	0.9852	0.014804	0.029608	0.10889	TRUE	30	31	60	137
ABCF1_60_TGTAATTGCCCCTATAGTAG	ABCF1	24.305	240.62	3.2553	29650	149.81	17.674	1	3.4351e-70	6.8702e-70	1.2316e-67	TRUE	11	11	12	241
ABCF2_26877_AACCAATGAGGCCATAACGA	ABCF2	476.59	456.42	-0.062254	203.45	7728.8	0.22944	0.40927	0.59073	0.81853	0.90523	FALSE	88	113	363	365
ABCF2_26878_ATGATCAGTACGTGAAGACG	ABCF2	375.15	181.42	-1.044	19369	5608.4	2.5868	0.0048435	0.99516	0.0096871	0.048336	FALSE	69	60	286	130
ABCF2_26879_CAGTCCATGCAAGATCCGCG	ABCF2	635.11	419.18	-0.59825	23561	11361	2.0257	0.021396	0.9786	0.042793	0.1405	FALSE	124	100	477	339
ABCF2_26880_GGGTCGTGAGCGATAAGGTG	ABCF2	226.14	333.25	0.5573	5788.9	2851.2	2.0058	0.97756	0.022439	0.044878	0.14508	TRUE	103	133	111	216
ABCF3_42323_ACTTCCAGGACTGCTAAAGA	ABCF3	344.5	202.43	-0.76415	10268	5003.8	2.0084	0.0223	0.9777	0.044599	0.14454	FALSE	49	82	277	130
ABCF3_42324_CAGCGGCTAGATGGTTACCG	ABCF3	566.42	555.73	-0.027436	57.125	9743.2	0.10829	0.45688	0.54312	0.91377	0.95844	FALSE	152	206	384	376
ABCF3_42325_GCAGAGTGTTGTACATGCGC	ABCF3	620.31	560.5	-0.14602	1789.7	11007	0.57006	0.28432	0.71568	0.56864	0.74009	FALSE	161	143	426	444
ABCF3_42326_TGCGAGAGGATTTGCTACGG	ABCF3	596.01	468.84	-0.34559	8115.1	10432	1.2451	0.10655	0.89345	0.21311	0.40773	FALSE	129	167	435	324
ABCG1_25381_ATGAAAGGGCTCGCTCAAGG	ABCG1	182.82	235.85	0.3657	1411.9	2147.2	1.1445	0.87378	0.12622	0.25243	0.45315	TRUE	82	76	91	171
ABCG1_25382_CTTCAGGAACCGAATAGGAA	ABCG1	119.41	242.53	1.0161	7812.2	1218.6	3.527	0.99979	0.00021025	0.00042049	0.0039092	TRUE	79	89	34	165
ABCG1_25383_GACCACAAGAGAGACCTCGG	ABCG1	328.65	494.62	0.5883	13916	4698.2	2.4214	0.99227	0.007731	0.015462	0.068266	TRUE	126	154	185	364
ABCG1_25384_GAGGCCGATCCCAATGTGCG	ABCG1	193.38	244.44	0.33648	1308	2314.1	1.0614	0.85574	0.14426	0.28852	0.49305	TRUE	78	80	105	176
ABCG2_24809_AAAAAACGAACGGATTAACA	ABCG2	632.99	537.59	-0.23529	4558.7	11311	0.89708	0.18484	0.81516	0.36968	0.57224	FALSE	122	110	477	453
ABCG2_24810_GAATTACATCAACTTTCCGG	ABCG2	134.21	150.87	0.16765	138.91	1423.1	0.44165	0.67057	0.32943	0.65887	0.80352	TRUE	78	37	49	121
ABCG2_24811_GGAAGGCTCTATGATCTCTG	ABCG2	358.24	585.33	0.70677	26170	5272.6	3.1274	0.99912	0.00088172	0.0017634	0.012795	TRUE	136	145	203	468
ABCG2_24812_TAACTTAGGATGTCTAAGCA	ABCG2	681.6	530.9	-0.35989	11400	12492	1.3483	0.088778	0.91122	0.17756	0.3625	FALSE	175	174	470	382
ABCG4_47459_CTCTGTGTCCCCAGTCATCG	ABCG4	825.32	942.45	0.19124	6866.8	16155	0.9215	0.82161	0.17839	0.35679	0.56031	TRUE	237	255	544	732
ABCG4_47460_GGTGGAGAGAACTACCTGGT	ABCG4	132.09	211.98	0.67827	3235	1393.4	2.1401	0.98382	0.016178	0.032357	0.11596	TRUE	47	68	78	154
ABCG4_47461_GTGGGACATGAACCGTAGGT	ABCG4	889.78	665.54	-0.41839	25275	17875	1.6773	0.046746	0.95325	0.093491	0.23771	FALSE	198	204	644	493
ABCG4_47462_TGGAGCTGTCCTATTCCGTG	ABCG4	850.68	636.89	-0.417	22972	16827	1.6481	0.049663	0.95034	0.099326	0.2477	FALSE	219	215	586	452
ABCG5_47583_ACACCTGAAAACGTTACCAA	ABCG5	45.44	175.69	1.9278	9381.3	339.94	7.0646	1	8.109e-13	1.6218e-12	5.2904e-11	TRUE	36	21	7	163
ABCG5_47584_GGCTCGCAGGAACCGAATTG	ABCG5	351.9	351.39	-0.0020814	0.12942	5148.1	0.0070909	0.49717	0.50283	0.99434	0.99729	FALSE	66	119	267	249
ABCG5_47585_GGTGCTATCCAGGACCGCGT	ABCG5	122.58	85.937	-0.50743	676.7	1261.8	1.0316	0.15088	0.84912	0.30176	0.50627	FALSE	23	22	93	68
ABCG5_47586_TGATTGGCAACTACAGCTTG	ABCG5	485.05	296.96	-0.70597	17952	7913.1	2.1144	0.017242	0.98276	0.034483	0.12117	FALSE	117	101	342	210
ABCG8_47587_CACCCCCATCTACTTAGGGG	ABCG8	998.63	685.59	-0.54194	49427	20877	2.1665	0.015136	0.98486	0.030273	0.11064	FALSE	245	211	700	507
ABCG8_47588_CAGTGCGCTGACACCCGCGT	ABCG8	383.6	304.6	-0.33171	3130.8	5778.3	1.0393	0.14934	0.85066	0.29868	0.50325	FALSE	81	99	282	220
ABCG8_47589_CTCAAACCAAGGGACCTGAG	ABCG8	1055.7	738.11	-0.5157	50831	22499	2.1173	0.017117	0.98288	0.034235	0.12052	FALSE	177	150	822	623
ABCG8_47590_GAGTCCTACGAAGATGCCTG	ABCG8	464.97	469.79	0.014852	11.625	7477.1	0.055762	0.52223	0.47777	0.95553	0.97882	TRUE	155	128	285	364
ABHD1_54063_AGCCCCTAGTCCTTTATCAG	ABHD1	147.94	182.38	0.30004	594.45	1620	0.85551	0.80384	0.19616	0.39232	0.59344	TRUE	77	71	63	120
ABHD1_54064_GACCCTACCGTTCCACAAGT	ABHD1	473.42	185.24	-1.349	43726	7659.9	3.2927	0.00049612	0.9995	0.00099223	0.0080553	FALSE	28	36	420	158
ABHD1_54065_GCTGTCGTGTTTAACAACCG	ABHD1	520.98	252.08	-1.0444	37316	8709.1	2.8813	0.0019799	0.99802	0.0039598	0.024428	FALSE	142	125	351	139
ABHD1_54066_GGTGCAAGACGTATGTCTCC	ABHD1	529.43	537.59	0.022012	33.254	8899.2	0.086449	0.53445	0.46555	0.93111	0.96751	TRUE	76	65	425	498
ABHD10_42411_TAATTGATGACTTAGCTGAT	ABHD10	495.61	316.06	-0.64738	16322	8145.2	1.9895	0.023321	0.97668	0.046643	0.14904	FALSE	83	103	386	228
ABHD10_42412_TACCTCAGCGGGCGCCACGG	ABHD10	487.16	465.97	-0.064022	224.52	7959.4	0.23751	0.40613	0.59387	0.81226	0.90178	FALSE	96	95	365	393
ABHD10_42413_TCATATAAGAAAGATAGCCA	ABHD10	83.483	151.82	0.85512	2386.5	758.29	2.4817	0.99345	0.0065452	0.01309	0.060377	TRUE	60	62	19	97
ABHD10_42414_TGCACGACCAGAGAAGGTCG	ABHD10	134.21	350.43	1.3781	24672	1423.1	5.7317	1	4.9712e-09	9.9424e-09	2.2467e-07	TRUE	31	47	96	320
ABHD11_52127_ACGGTGGATGCTCGTAACCA	ABHD11	298	433.51	0.53922	9260.7	4121.7	2.1106	0.9826	0.017402	0.034805	0.12191	TRUE	73	145	209	309
ABHD11_52128_CTGCCACATAGGTTGCAAAG	ABHD11	380.43	370.49	-0.03811	49.442	5714.4	0.13154	0.44767	0.55233	0.89535	0.94865	FALSE	100	126	260	262
ABHD11_52129_GAGCCCGTGCAAAAAGACGA	ABHD11	188.1	562.41	1.575	75052	2230.2	7.926	1	1.1313e-15	2.2626e-15	9.1401e-14	TRUE	117	99	61	490
ABHD11_52130_GCTGTGGCCAACGACGACGC	ABHD11	434.32	770.57	0.82571	57677	6824.1	4.0704	0.99998	2.3466e-05	4.6932e-05	0.00057828	TRUE	99	129	312	678
ABHD12_34539_AGGTGACCACATGGTAACCA	ABHD12	235.65	193.84	-0.28052	876.47	3012.3	0.76194	0.22304	0.77696	0.44608	0.6414	FALSE	58	54	165	149
ABHD12_34540_CCTACGCCTGACGGGCCCGG	ABHD12	562.19	645.49	0.199	3473.2	9645.7	0.84811	0.80181	0.19819	0.39638	0.59699	TRUE	151	129	381	547
ABHD12_34541_GAGTGGCCCCAGATGTACAC	ABHD12	637.22	522.31	-0.28639	6618.5	11412	1.0757	0.14104	0.85896	0.28208	0.48601	FALSE	159	155	444	392
ABHD12_34542_GCAGGTACAGAATGATAGGG	ABHD12	285.32	174.74	-0.7042	6205.1	3889	1.7733	0.038091	0.96191	0.076182	0.20741	FALSE	69	60	201	123
ABHD12B_61421_CCAAGACAATAGCATCAACT	ABHD12B	98.278	153.73	0.64024	1556.7	941.15	1.8076	0.96464	0.035356	0.070713	0.19742	TRUE	39	32	54	129
ABHD12B_61422_GTCTTGTCTGTTGACTACAG	ABHD12B	225.09	332.29	0.5599	5800.4	2833.4	2.014	0.97799	0.022006	0.044011	0.14317	TRUE	71	78	142	270
ABHD12B_61423_TAATTGGGTTCCCATCACGA	ABHD12B	201.84	134.64	-0.5806	2281.1	2449.9	1.3577	0.087253	0.91275	0.17451	0.35846	FALSE	77	45	114	96
ABHD12B_61424_TTGTGTCTATGAGTGGACCA	ABHD12B	235.65	304.6	0.36886	2386.5	3012.3	1.2562	0.89548	0.10452	0.20905	0.40297	TRUE	107	65	116	254
ABHD13_54567_AATAGCCACTGCTCCACCCA	ABHD13	1075.8	987.32	-0.12365	3913	23077	0.58222	0.28021	0.71979	0.56042	0.73341	FALSE	278	248	740	786
ABHD13_54568_CATGGGAATGCAGGCAACAT	ABHD13	967.98	782.03	-0.3074	17338	20020	1.3142	0.094385	0.90561	0.18877	0.37744	FALSE	328	279	588	540
ABHD13_54569_GGGAACATAAAGACGTGAAG	ABHD13	313.85	303.65	-0.047553	52.114	4417.5	0.1536	0.43896	0.56104	0.87792	0.93884	FALSE	144	102	153	216
ABHD13_54570_TAGGATTTCAGCCATTATGG	ABHD13	589.67	488.89	-0.26989	5089.2	10284	0.99378	0.16017	0.83983	0.32033	0.52491	FALSE	171	131	387	381
ABHD14A_33935_AGGCCTTTAACTCTCACACG	ABHD14A	622.42	528.99	-0.23424	4372	11058	0.88851	0.18713	0.81287	0.37427	0.57662	FALSE	202	150	387	404
ABHD14A_33936_CTGGCAGCCCCACATACAGT	ABHD14A	559.02	733.33	0.39096	15262	9572.8	1.7816	0.96259	0.037408	0.074815	0.20501	TRUE	228	201	301	567
ABHD14A_33937_GGAGGTACAGAATGCCGTGT	ABHD14A	497.73	639.76	0.36152	10126	8191.8	1.5692	0.9417	0.058299	0.1166	0.27529	TRUE	180	176	291	494
ABHD14A_33938_TCCCACTCAACCAGGCACAC	ABHD14A	1232.2	1139.1	-0.11315	4328.1	27705	0.55886	0.28813	0.71187	0.57626	0.74384	FALSE	272	248	894	945
ABHD14B_54259_AGAACCTGGGTACACTGCAC	ABHD14B	991.23	759.11	-0.38446	27058	20669	1.6145	0.053208	0.94679	0.10642	0.25942	FALSE	182	170	756	625
ABHD14B_54260_GAGAGGCCCTGCCCGGCAGT	ABHD14B	703.79	994.01	0.49751	42424	13042	2.5413	0.99448	0.0055226	0.011045	0.053283	TRUE	169	202	497	839
ABHD14B_54261_TGATGGACTGATCACAACCG	ABHD14B	584.38	465.02	-0.329	7147.2	10160	1.1842	0.11817	0.88183	0.23633	0.4348	FALSE	144	98	409	389
ABHD14B_54262_TGCAGGTCTGGGGCACTCCA	ABHD14B	932.05	1133.4	0.28192	20323	19026	1.4599	0.92783	0.072165	0.14433	0.31774	TRUE	219	211	663	976
ABHD15_57701_CAAACAAGGCTGCACCCTCC	ABHD15	403.68	470.75	0.22124	2252.4	6186.9	0.85267	0.80308	0.19692	0.39384	0.59472	TRUE	63	71	319	422
ABHD15_57702_CTGGTGATCCCCAATGCGTG	ABHD15	252.56	141.32	-0.83321	6316	3304.3	1.9353	0.026474	0.97353	0.052948	0.16256	FALSE	41	30	198	118
ABHD15_57703_GGCCGGCCTCGAACCACTCT	ABHD15	209.24	117.45	-0.82776	4299	2570.4	1.8105	0.035095	0.9649	0.07019	0.19658	FALSE	54	44	144	79
ABHD15_57704_TGTATGTGACCGCCTCCTTG	ABHD15	462.86	498.44	0.10663	633.22	7431.6	0.41274	0.6601	0.3399	0.6798	0.81766	TRUE	166	117	272	405
ABHD16A_21085_ACCATGTTTGTGGACCGGCG	ABHD16A	458.63	566.23	0.30347	5805.2	7340.7	1.2559	0.89542	0.10458	0.20915	0.40311	TRUE	198	197	236	396
ABHD16A_21086_ATCTACGCCTGGTCCATCGG	ABHD16A	334.99	347.57	0.053029	79.132	4819.8	0.1812	0.57189	0.42811	0.85621	0.92728	TRUE	101	71	216	293
ABHD16A_21087_CCATCTTGGAAGCAACACAT	ABHD16A	466.03	247.31	-0.91137	24509	7499.9	2.5255	0.0057759	0.99422	0.011552	0.055102	FALSE	61	64	380	195
ABHD16A_21088_CTCAGGAAGGAGTCTCGAGG	ABHD16A	400.51	342.79	-0.22388	1667.9	6121.9	0.73762	0.23037	0.76963	0.46075	0.65468	FALSE	45	45	334	314
ABHD16B_60917_CAGACCAGCCGTAGACCACC	ABHD16B	343.44	183.33	-0.90195	13128	4983.3	2.2681	0.011661	0.98834	0.023322	0.091708	FALSE	99	83	226	109
ABHD16B_60918_CATCTGCTGCGAAGGCAACG	ABHD16B	296.95	136.54	-1.1151	13337	4102.2	2.5044	0.0061315	0.99387	0.012263	0.05751	FALSE	43	67	238	76
ABHD16B_60919_GCGCACGTCATCCCAGCGGA	ABHD16B	391	413.45	0.080371	252.22	5928	0.29168	0.61473	0.38527	0.77053	0.87572	TRUE	94	77	276	356
ABHD16B_60920_GGCCGCTGGCTCGTGTACCC	ABHD16B	257.85	351.39	0.44507	4401.1	3396.9	1.605	0.94575	0.054251	0.1085	0.26282	TRUE	94	100	150	268
ABHD17A_52039_ACCGTAGCCGGAGTAGTCGT	ABHD17A	99.334	115.54	0.21599	131.47	954.59	0.52445	0.69982	0.30018	0.60036	0.76157	TRUE	17	22	77	99
ABHD17A_52040_AGGCTCTCAGGGTCCCCAAG	ABHD17A	541.06	531.86	-0.024691	42.304	9162.3	0.096095	0.46172	0.53828	0.92344	0.96369	FALSE	104	136	408	421
ABHD17A_52041_GCGCGAGCTGGACACCATCG	ABHD17A	164.85	307.46	0.8952	10412	1870.9	3.2971	0.99951	0.00048845	0.00097691	0.0079475	TRUE	62	43	94	279
ABHD17A_52042_TACACGGTCCTCTTCTCGCA	ABHD17A	110.96	257.81	1.2089	11248	1105.5	4.4168	0.99999	5.0101e-06	1.002e-05	0.00014262	TRUE	22	45	83	225
ABHD17B_37815_CTTGGCTTGCTCTTAGGACA	ABHD17B	1196.2	862.24	-0.47188	56150	26622	2.047	0.020327	0.97967	0.040655	0.1357	FALSE	225	260	907	643
ABHD17B_37816_GAGTAAAGTGTATTTCGCAT	ABHD17B	482.93	630.21	0.3833	10893	7866.9	1.6604	0.95159	0.048414	0.096827	0.24347	TRUE	171	172	286	488
ABHD17B_37817_TATAGGGACAGTACCGTCTG	ABHD17B	1122.3	1129.6	0.009387	26.883	24429	0.046913	0.51871	0.48129	0.96258	0.98191	TRUE	393	368	669	815
ABHD17B_37818_TTCATGACTAGAACCAGTAA	ABHD17B	309.63	205.29	-0.59048	5499.6	4338.1	1.5841	0.056589	0.94341	0.11318	0.26985	FALSE	92	83	201	132
ABHD17C_46563_ACGCCGACATCGACGCCGCG	ABHD17C	571.7	489.84	-0.22252	3355.3	9865.3	0.82415	0.20493	0.79507	0.40986	0.60848	FALSE	223	175	318	338
ABHD17C_46564_GCCGTATCCCGAGTAGTCGT	ABHD17C	280.04	331.34	0.24188	1318.1	3793	0.83293	0.79756	0.20244	0.40489	0.60437	TRUE	107	148	158	199
ABHD17C_46565_GCGCGAGAAGAAGACCTCGA	ABHD17C	380.43	389.58	0.034212	41.894	5714.4	0.12109	0.54819	0.45181	0.90362	0.95341	TRUE	131	112	229	296
ABHD17C_46566_TCCCAATGCTCTGACCATAG	ABHD17C	598.12	631.16	0.077451	546.01	10482	0.32274	0.62655	0.37345	0.74689	0.86114	TRUE	112	123	454	538
ABHD2_29975_AGGTGACCTACCTGTGCGAG	ABHD2	332.88	347.57	0.062133	107.96	4779.2	0.21254	0.58416	0.41584	0.83169	0.91255	TRUE	80	81	235	283
ABHD2_29976_GCTCAGCCAAGGGCTCGAAG	ABHD2	128.92	160.42	0.31313	497.38	1349.2	0.8574	0.80434	0.19566	0.39131	0.59244	TRUE	44	37	78	131
ABHD2_29977_GGGCGTAGTCAACGAAAGTG	ABHD2	97.221	164.24	0.75043	2283.6	927.77	2.2002	0.98609	0.013908	0.027816	0.10401	TRUE	51	71	41	101
ABHD2_29978_TTTGCCCACAGGCTGCACGT	ABHD2	396.28	305.56	-0.37401	4132.9	6035.5	1.1678	0.12144	0.87856	0.24288	0.44252	FALSE	107	121	268	199
ABHD3_64313_ACTCCTTGCTTGTTCCCGTG	ABHD3	555.85	415.36	-0.41944	9920.2	9500	1.4414	0.074743	0.92526	0.14949	0.32508	FALSE	146	153	380	282
ABHD3_64314_GGGGGCTTCGAAGTGATGAA	ABHD3	169.08	153.73	-0.13644	117.84	1935	0.34889	0.36355	0.63645	0.72709	0.84821	FALSE	85	65	75	96
ABHD3_64315_GTCACTACTTCCAGACGCCA	ABHD3	235.65	114.58	-1.0339	7562	3012.3	2.2059	0.013685	0.98631	0.027371	0.10287	FALSE	24	22	199	98
ABHD3_64316_TAGTACGTTTCTGTAACCAC	ABHD3	232.48	258.77	0.15389	345.63	2958.3	0.48322	0.68553	0.31447	0.62895	0.78244	TRUE	75	68	145	203
ABHD4_47051_GACATCGATAGAGACATGGC	ABHD4	468.14	464.06	-0.012594	8.3136	7545.5	0.046942	0.48128	0.51872	0.96256	0.98191	FALSE	108	106	335	380
ABHD4_47052_GCTACTCGAAGAACAGCCAA	ABHD4	129.98	60.156	-1.0988	2525.7	1363.9	1.8907	0.029125	0.97088	0.058249	0.17345	FALSE	37	26	86	37
ABHD4_47053_GGAGGGATACATATCTGGCC	ABHD4	156.4	31.51	-2.2755	8923.8	1744.3	2.9903	0.0013034	0.9987	0.0026068	0.017493	FALSE	81	26	67	7
ABHD4_47054_GGGGTGCACGGATCTCACTG	ABHD4	318.08	377.17	0.24511	1748.9	4497.2	0.88111	0.81087	0.18913	0.37826	0.58048	TRUE	129	118	172	277
ABHD5_37795_GGTCGTTCAGGGAAACCCCA	ABHD5	292.72	151.82	-0.94258	10188	4024.3	2.221	0.013172	0.98683	0.026345	0.10014	FALSE	50	38	227	121
ABHD5_37796_GTGGAGATGTGCCCTAGGAT	ABHD5	60.235	113.63	0.90454	1460.6	492.7	2.4055	0.9919	0.0081028	0.016206	0.070626	TRUE	38	55	19	64
ABHD5_37797_TAAGGTGTGATATAGACGTA	ABHD5	73.972	126.04	0.76087	1379.3	646.2	2.0483	0.9797	0.020302	0.040603	0.13558	TRUE	43	34	27	98
ABHD5_37798_TTGGACGAAGTAGTAGACCC	ABHD5	438.55	477.43	0.12228	756.14	6913.3	0.4676	0.67997	0.32003	0.64007	0.7901	TRUE	105	103	310	397
ABHD6_45423_AGTCTTCATGGTGAACATAG	ABHD6	50.724	92.621	0.85601	897.23	392.87	2.1138	0.98264	0.017357	0.034715	0.12169	TRUE	29	59	19	38
ABHD6_45424_CAAGGATATGTGGCTCAGTG	ABHD6	1117	1033.2	-0.11244	3514.6	24275	0.53802	0.29528	0.70472	0.59057	0.75407	FALSE	286	290	771	792
ABHD6_45425_CTGACAATCAATTTGTACAA	ABHD6	154.29	192.88	0.32026	747.16	1713	0.93254	0.82446	0.17554	0.35109	0.55497	TRUE	60	56	86	146
ABHD6_45426_GCAAGTTAAGAGGATACACC	ABHD6	137.38	154.69	0.17004	149.95	1468	0.45179	0.67424	0.32576	0.65153	0.79816	TRUE	36	67	94	95
ABHD8_49299_GATGAAAAAGAGCACCACGT	ABHD8	257.85	90.712	-1.4969	14877	3396.9	2.8677	0.0020628	0.99794	0.0041257	0.025227	FALSE	42	33	202	62
ABHD8_49300_GCCGGGCTTGACCTCTACAA	ABHD8	320.19	350.43	0.1298	457.43	4537.2	0.44892	0.67326	0.32674	0.65349	0.79969	TRUE	114	84	189	283
ABHD8_49301_GTACCCAGACCTAGTGCACA	ABHD8	492.44	621.61	0.33545	8370.5	8075.4	1.4374	0.9247	0.075303	0.15061	0.32659	TRUE	143	216	323	435
ABHD8_49302_TCACCGTGTACCGCAATGGG	ABHD8	566.42	324.65	-0.80108	29783	9743.2	2.4493	0.0071566	0.99284	0.014313	0.064459	FALSE	146	69	390	271
ABI1_26705_GAGTTACCAGAACCTGACTC	ABI1	321.25	549.04	0.77136	26405	4557.3	3.3743	0.99963	0.00036997	0.00073994	0.0063073	TRUE	116	129	188	446
ABI1_26706_GTTGTGTCGAGATATCTGCC	ABI1	631.94	640.71	0.019865	38.505	11285	0.082606	0.53292	0.46708	0.93416	0.96889	TRUE	138	148	460	523
ABI1_26707_GTTTCCGAATATACCTTACA	ABI1	220.86	188.11	-0.23045	537.24	2762.6	0.62315	0.26658	0.73342	0.53317	0.71274	FALSE	87	40	122	157
ABI1_26708_TCGCCACCCACTATTGGACC	ABI1	653.07	625.43	-0.062285	381.95	11795	0.25447	0.39956	0.60044	0.79913	0.89408	FALSE	204	160	414	495
ABI2_27173_ACGAACTGGTCGTTCAAGGT	ABI2	307.51	121.27	-1.3353	18249	4298.5	2.8407	0.0022492	0.99775	0.0044985	0.026949	FALSE	56	42	235	85
ABI2_27174_CATACTCCCCCAACAATAGG	ABI2	81.37	63.976	-0.34221	151.82	732.99	0.64247	0.2593	0.7407	0.51861	0.70145	FALSE	38	20	39	47
ABI2_27175_TGCCTATCTGATAAACACCT	ABI2	101.45	35.33	-1.4957	2330.5	981.6	2.1103	0.016823	0.98318	0.033646	0.11912	FALSE	22	27	74	10
ABI2_27176_TTACCTGGAAAGACACTGGG	ABI2	100.39	110.76	0.14052	53.828	968.07	0.33338	0.63034	0.36966	0.73931	0.85619	TRUE	47	42	48	74
ABI3_38171_CCTGTCTCGAAAGAGCATCA	ABI3	543.17	358.07	-0.59978	17315	9210.3	1.9287	0.026885	0.97311	0.053771	0.16431	FALSE	136	145	378	230
ABI3_38172_CGGGCACACTCTGCGCATGT	ABI3	1632.7	1011.2	-0.69063	195860	40485	3.0887	0.0010051	0.99899	0.0020101	0.014191	FALSE	337	272	1208	787
ABI3_38173_GCGATGACCTTCTGGCCGGG	ABI3	917.26	693.23	-0.40349	25217	18621	1.6417	0.050323	0.94968	0.10065	0.24984	FALSE	207	163	661	563
ABI3_38174_TCAGGCCACAGACAAGCGGA	ABI3	601.29	661.72	0.13794	1826.8	10557	0.58813	0.72178	0.27822	0.55644	0.7304	TRUE	217	245	352	448
ABI3BP_33995_GAGATATCAGATTCCTACAC	ABI3BP	64.462	167.1	1.3606	5554.6	538.81	4.4217	1	4.909e-06	9.8179e-06	0.00013994	TRUE	34	32	27	143
ABI3BP_33996_GGGATAGATGTAGTTTGCTG	ABI3BP	120.47	89.757	-0.42051	474.17	1233	0.87466	0.19064	0.80936	0.38127	0.58294	FALSE	53	41	61	53
ABI3BP_33997_TCCTCATAAACCATACCCTG	ABI3BP	177.53	228.21	0.36048	1289.2	2064.9	1.1152	0.86762	0.13238	0.26476	0.46701	TRUE	73	62	95	177
ABI3BP_33998_TCTAATGCACTAGACGTAGT	ABI3BP	292.72	342.79	0.22711	1255.7	4024.3	0.78937	0.78505	0.21495	0.4299	0.62677	TRUE	99	152	178	207
ABL1_65_CTTAGGCTATAATCACAATG	ABL1	300.12	231.08	-0.37572	2393.4	4160.8	1.0703	0.14224	0.85776	0.28447	0.48854	FALSE	90	68	194	174
ABL1_66_GGTTCATCATCATTCAACGG	ABL1	161.68	318.92	0.97567	12712	1823.1	3.6826	0.99988	0.00011544	0.00023088	0.0023446	TRUE	43	76	110	258
ABL1_67_TCAGTGATGATATAGAACGG	ABL1	305.4	406.77	0.41234	5164.2	4259.1	1.5533	0.93982	0.060177	0.12035	0.28113	TRUE	123	105	166	321
ABL1_68_TTGCTCCCTCGAAAAGAGCG	ABL1	1438.2	896.61	-0.68114	148700	34123	2.932	0.0016837	0.99832	0.0033673	0.021429	FALSE	187	214	1174	725
ABL2_73_AACCTCTGTAATGACGACGG	ABL2	240.94	404.86	0.74634	13659	3102.8	2.9428	0.99837	0.0016263	0.0032526	0.020885	TRUE	59	82	169	342
ABL2_74_GGTTCAACATCACAACCATA	ABL2	172.25	47.743	-1.8296	8495.2	1983.5	2.7956	0.0025351	0.99746	0.0050701	0.0296	FALSE	38	31	125	19
ABL2_75_TATCGAATGGAACAGCCTGA	ABL2	283.21	449.74	0.66534	14050	3850.5	2.6837	0.99636	0.0036406	0.0072812	0.038925	TRUE	63	73	205	398
ABL2_76_TGTACACCATCACTCCACAG	ABL2	456.52	183.33	-1.3115	39189	7295.4	3.1984	0.00069102	0.99931	0.001382	0.010527	FALSE	54	74	378	118
ABLIM1_10657_TAAGCAATCTACGAAGACCG	ABLIM1	189.16	256.86	0.43937	2304.9	2247	1.4282	0.92338	0.076621	0.15324	0.33001	TRUE	97	84	82	185
ABLIM1_10658_TCTAACTCCAACTTACGCTC	ABLIM1	441.72	227.26	-0.95574	23620	6980.3	2.5669	0.0051298	0.99487	0.01026	0.050477	FALSE	40	43	378	195
ABLIM1_10659_TCTTTCGGACTGGACGACAT	ABLIM1	506.18	527.08	0.058259	218.43	8378.9	0.22833	0.5903	0.4097	0.81939	0.90564	TRUE	109	88	370	464
ABLIM1_10660_TGTTACATACACGCCCACGT	ABLIM1	246.22	137.5	-0.83593	6033.8	3194	1.9238	0.027185	0.97282	0.05437	0.16554	FALSE	93	66	140	78
ABLIM2_53627_AGGTCGGAGTGTAGCGCCCG	ABLIM2	202.9	299.83	0.5611	4742.2	2467.1	1.9515	0.9745	0.025499	0.050998	0.15848	TRUE	83	127	109	187
ABLIM2_53628_CTTACATAAATCACACGGCT	ABLIM2	86.653	106.94	0.30041	206.43	796.63	0.71891	0.76365	0.23635	0.4727	0.66467	TRUE	33	25	49	87
ABLIM2_53629_GCTGTGAGAAATACATCACG	ABLIM2	109.9	103.12	-0.090969	22.969	1091.5	0.20512	0.41848	0.58152	0.83696	0.91582	FALSE	53	46	51	62
ABLIM2_53630_GTGAGTAGGAGATCATGTCG	ABLIM2	104.62	173.78	0.72672	2430	1022.5	2.1631	0.98472	0.015277	0.030553	0.11134	TRUE	56	62	43	120
ABLIM3_31115_AGGTCACCTTGTCTCCAATG	ABLIM3	691.11	542.36	-0.3491	11104	12727	1.3186	0.093658	0.90634	0.18732	0.37564	FALSE	212	172	442	396
ABLIM3_31116_CAAGGTTAAGTCTATCTACG	ABLIM3	417.42	496.53	0.24984	3135.2	6470.5	0.98349	0.83732	0.16268	0.32537	0.5301	TRUE	186	108	209	412
ABLIM3_31117_GGAAGTGGTTGTTGTGCACG	ABLIM3	935.22	966.32	0.047139	483.51	19114	0.22492	0.58898	0.41102	0.82204	0.90718	TRUE	416	301	469	711
ABLIM3_31118_TGGGGGAGTCTATGTACCCC	ABLIM3	652.01	451.65	-0.52872	20241	11769	1.8469	0.032381	0.96762	0.064761	0.186	FALSE	190	127	427	346
ABO_77_AGCCAAAGGTGCTGACACCG	ABO	269.47	382.9	0.50525	6482.3	3603	1.8897	0.9706	0.0294	0.058801	0.1745	TRUE	120	146	135	255
ABO_78_ATGGAGTTCCGCGACCACGT	ABO	649.9	417.27	-0.63799	27387	11718	2.149	0.015819	0.98418	0.031638	0.11418	FALSE	162	121	453	316
ABO_79_CCGGTCCCCAGCGTCACGCG	ABO	168.02	199.57	0.24686	498.39	1918.9	0.72006	0.76424	0.23576	0.47152	0.66358	TRUE	62	77	97	132
ABO_80_TGATCAGTGACTTCTGCGAG	ABO	540	711.37	0.397	14754	9138.3	1.7927	0.96349	0.03651	0.073021	0.20188	TRUE	119	130	392	615
ABR_81_CAAGAGTGAAATCCAGAAGG	ABR	290.61	312.24	0.10325	234.08	3985.5	0.34267	0.63408	0.36592	0.73184	0.85119	TRUE	122	101	153	226
ABR_82_CTGCAGTGACAACGCCCAAG	ABR	127.87	347.57	1.4356	25581	1334.5	6.0142	1	9.043e-10	1.8086e-09	4.4435e-08	TRUE	77	89	44	275
ABR_83_GAGGCTTGACACTCACGTGT	ABR	192.33	337.07	0.80625	10678	2297.3	3.0198	0.99874	0.0012649	0.0025298	0.017092	TRUE	57	60	125	293
ABR_84_TACTGTCCTCGGACTACGAG	ABR	194.44	224.39	0.2057	449.09	2331	0.62034	0.73248	0.26752	0.53505	0.714	TRUE	43	65	141	170
ABRA_60493_CCTCAGCCACAGGTACGAGA	ABRA	175.42	117.45	-0.57477	1697.2	2032.2	1.286	0.09918	0.90082	0.19836	0.38982	FALSE	28	45	138	78
ABRA_60494_CCTGGTGTCTGAGCTAACCA	ABRA	378.32	359.98	-0.071472	168.09	5671.9	0.24344	0.40383	0.59617	0.80767	0.89914	FALSE	119	162	239	215
ABRA_60495_GAAAGAGGTGTCCAAAACGG	ABRA	507.24	413.45	-0.29429	4409.3	8402.4	1.0231	0.15312	0.84688	0.30625	0.51045	FALSE	148	109	332	324
ABRA_60496_GAATGCATTCACTTACTGGG	ABRA	648.84	523.26	-0.3098	7908	11693	1.1614	0.12275	0.87725	0.2455	0.44539	FALSE	176	191	438	357
ABRACL_46675_AAAGTTAAGCGTGAAATTTG	ABRACL	623.48	379.08	-0.71636	30323	11083	2.3215	0.010129	0.98987	0.020258	0.082669	FALSE	214	172	376	225
ABRACL_46676_AGCAATGAATGTGGATCACG	ABRACL	261.02	470.75	0.84835	22464	3452.8	3.5692	0.99982	0.00017902	0.00035805	0.0034135	TRUE	83	101	164	392
ABRACL_46677_CGAGGTTAACCTCTTAGTGG	ABRACL	237.77	304.6	0.35603	2241.8	3048.4	1.2105	0.88695	0.11305	0.22611	0.42277	TRUE	78	60	147	259
ABRACL_46678_GGTTGGCACATTTATCATCA	ABRACL	255.73	232.99	-0.13385	258.86	3359.8	0.39244	0.34736	0.65264	0.69472	0.82728	FALSE	51	58	191	186
ABT1_36603_AAAAAAGCGGTCCTACACCA	ABT1	87.71	200.52	1.1838	6627.1	809.51	3.9649	0.99996	3.6744e-05	7.3487e-05	0.0008603	TRUE	58	38	25	172
ABT1_36604_AGAACAGACACTAGATGCGG	ABT1	67.632	122.22	0.84431	1522.1	574.06	2.2784	0.98862	0.011378	0.022756	0.09007	TRUE	21	31	43	97
ABT1_36605_GACGCGTCCGACCTCGCCAT	ABT1	9.5107	17.187	0.79108	30.092	44.441	1.1516	0.86486	0.13514	0.27027	0.47304	TRUE	3	0	6	18
ABT1_36606_GTTCCAAAGATCATAACGGA	ABT1	29.589	139.41	2.1986	6849.7	193.69	7.8909	1	1.5256e-15	3.0513e-15	1.2186e-13	TRUE	11	37	17	109
ABTB1_51135_CGCACTTACTCGGAGCTCGG	ABTB1	177.53	148	-0.26085	436.92	2064.9	0.64986	0.25786	0.74214	0.51571	0.69895	FALSE	43	46	125	109
ABTB1_51136_CTACAAAGACCACGTCACTG	ABTB1	342.39	393.4	0.19983	1302.9	4962.8	0.72417	0.76552	0.23448	0.46896	0.66134	TRUE	93	113	231	299
ABTB1_51137_GGGCTCGGAAGTAGTCACTG	ABTB1	44.383	114.58	1.3487	2597.1	329.59	3.8668	0.99994	5.5545e-05	0.00011109	0.0012393	TRUE	28	35	14	85
ABTB1_51138_TGTAATCGCGTAGAGCCCGG	ABTB1	181.76	98.351	-0.87936	3559.2	2130.7	1.807	0.03534	0.96466	0.07068	0.19737	FALSE	44	53	128	50
ABTB2_33875_AGGGGCTGAAGTATGCGGGG	ABTB2	293.78	325.61	0.14794	506.95	4043.7	0.50057	0.69166	0.30834	0.61668	0.77355	TRUE	150	107	128	234
ABTB2_33876_CCTCATCAACCAAGCCATCG	ABTB2	435.38	421.09	-0.048024	102.07	6846.4	0.17267	0.43146	0.56854	0.86291	0.93107	FALSE	142	111	270	330
ABTB2_33877_GAGGGCTCGGCAGTGAACGG	ABTB2	417.42	389.58	-0.099308	387.45	6470.5	0.34601	0.36467	0.63533	0.72934	0.84966	FALSE	98	82	297	326
ABTB2_33878_TGTTCAAGGTCATTCTCGGG	ABTB2	1009.2	714.23	-0.49814	43824	21175	2.027	0.021332	0.97867	0.042665	0.1402	FALSE	150	128	805	620
ACAA1_85_AGCGCGAAGTAATATTTCCA	ACAA1	76.086	55.382	-0.45124	215.67	670.72	0.79944	0.21071	0.78929	0.42143	0.61875	FALSE	11	12	61	46
ACAA1_86_CTGCCGAGAGAAGCTCGTCG	ACAA1	294.83	162.33	-0.85703	8971.4	4063.2	2.0788	0.018818	0.98118	0.037636	0.12857	FALSE	57	72	222	98
ACAA1_87_GCCCTTGTCATCATGGACCG	ACAA1	274.75	148	-0.88804	8221.9	3697.7	2.0844	0.018557	0.98144	0.037115	0.12739	FALSE	74	60	186	95
ACAA1_88_TCAATAGACAGTGTTCGTCG	ACAA1	275.81	256.86	-0.10233	179.68	3716.7	0.3109	0.37794	0.62206	0.75587	0.86694	FALSE	76	58	185	211
ACAA2_28113_TACCTGACATCCATTCACAA	ACAA2	30.646	113.63	1.8569	3786.5	202.79	5.8272	1	2.8625e-09	5.7249e-09	1.3354e-07	TRUE	23	26	6	93
ACAA2_28114_TAGCAGTGAAGTCTTTCAGA	ACAA2	317.02	317.01	-5.0041e-05	6.0839e-05	4477.2	0.00016485	0.49993	0.50007	0.99987	0.9999	FALSE	110	73	190	259
ACAA2_28115_TGTTACTGCAGGGAATGCAT	ACAA2	100.39	111.72	0.15279	64.202	968.07	0.36407	0.64187	0.35813	0.71626	0.84149	TRUE	37	27	58	90
ACAA2_28116_TTTCTGTAACTGTTCCAGGG	ACAA2	158.51	194.79	0.29565	659.83	1775.7	0.86093	0.80535	0.19465	0.38931	0.5905	TRUE	83	93	67	111
ACACA_89_AATGCATGCGGTCTATCCGT	ACACA	269.47	546.18	1.0165	39453	3603	4.6099	1	2.0143e-06	4.0286e-06	6.1986e-05	TRUE	77	86	178	486
ACACA_90_CCAGAGTCCCACATTCCCTG	ACACA	307.51	462.15	0.58615	12080	4298.5	2.3586	0.99083	0.0091716	0.018343	0.077163	TRUE	52	50	239	434
ACACA_91_TATTTGCCTAGGTACCGAAG	ACACA	231.43	321.79	0.4738	4110	2940.4	1.6664	0.95218	0.04782	0.09564	0.24154	TRUE	87	71	132	266
ACACA_92_TGATGGGTCCATGATAACCG	ACACA	43.327	97.396	1.1504	1519.9	319.32	3.0258	0.99875	0.0012495	0.002499	0.016911	TRUE	29	19	12	83
ACACB_93_AAAGCGTGTGACAAACTCAG	ACACB	146.89	108.85	-0.42892	727.33	1604.6	0.94948	0.17109	0.82891	0.34217	0.54651	FALSE	21	27	118	87
ACACB_94_ACAACGACATCGACACCGGG	ACACB	464.97	437.33	-0.088231	382.17	7477.1	0.31969	0.3746	0.6254	0.74921	0.86279	FALSE	130	149	310	309
ACACB_95_GAACTCGAATATGGCCAGCG	ACACB	150.06	243.49	0.69467	4427.9	1650.8	2.2995	0.98926	0.010739	0.021478	0.086264	TRUE	45	41	97	214
ACACB_96_GTCGGAGTCCATAATCCACA	ACACB	165.91	250.17	0.58962	3587.3	1886.9	1.9399	0.9738	0.0262	0.0524	0.16146	TRUE	63	64	94	198
ACAD10_51251_AGCTCGATACTGCTTAACCC	ACAD10	47.554	83.073	0.79206	642.88	360.88	1.8697	0.96905	0.030951	0.061903	0.18065	TRUE	14	16	31	71
ACAD10_51252_ATCGCTTGTAGACTCCCTGT	ACAD10	149	105.03	-0.50044	973.88	1635.4	1.0872	0.13837	0.86163	0.27675	0.48011	FALSE	59	87	82	23
ACAD10_51253_CCAGCTCATACCTCAAGGGG	ACAD10	79.256	145.14	0.86465	2219.1	707.92	2.4762	0.99335	0.0066498	0.0133	0.061106	TRUE	31	46	44	106
ACAD10_51254_TCCAACTTACTACATCAGGC	ACAD10	258.9	318.92	0.29975	1806.1	3415.5	1.027	0.84779	0.15221	0.30442	0.50872	TRUE	67	43	178	291
ACAD11_52951_CCACTCCGATAGCTGTTGCA	ACAD11	244.11	412.5	0.75446	14419	3157.4	2.9968	0.99864	0.0013643	0.0027286	0.018149	TRUE	102	131	129	301
ACAD11_52952_CCTTGGCCAAAAGTAGAACA	ACAD11	197.61	160.42	-0.29916	693.63	2381.8	0.76215	0.22297	0.77703	0.44593	0.64129	FALSE	67	58	120	110
ACAD11_52953_CTGAGCCAATGTTTCTACCG	ACAD11	225.09	154.69	-0.53823	2499.7	2833.4	1.3226	0.092978	0.90702	0.18596	0.37392	FALSE	69	52	144	110
ACAD11_52954_TTGTTTGTACAGACTCGGAA	ACAD11	140.55	86.892	-0.68748	1460	1513.2	1.3793	0.083759	0.91624	0.16752	0.3492	FALSE	35	34	98	57
ACAD8_35443_CAAGGCTTCAAAAATGACAG	ACAD8	206.07	238.71	0.21123	533.7	2518.6	0.65057	0.74233	0.25767	0.51534	0.69859	TRUE	66	66	129	184
ACAD8_35444_GCTTCGGAAATGAGGAACAG	ACAD8	420.59	544.27	0.37114	7680.6	6536.5	1.5298	0.93697	0.063029	0.12606	0.29026	TRUE	171	146	227	424
ACAD8_35445_TCAGTCCTCTCACGGCAATG	ACAD8	1630.6	850.78	-0.9377	311930	40414	3.8789	5.247e-05	0.99995	0.00010494	0.0011782	FALSE	264	287	1279	604
ACAD8_35446_TCGAAGATCACAGCTCGTGT	ACAD8	641.45	898.52	0.48558	33278	11514	2.3958	0.99171	0.0082921	0.016584	0.071827	TRUE	225	238	382	703
ACAD9_36271_CACCATGTACTCAAGACTAG	ACAD9	480.82	460.24	-0.06297	211.75	7820.8	0.23269	0.408	0.592	0.816	0.90378	FALSE	152	142	303	340
ACAD9_36272_CTTGCCTAAACTGGCGTCCG	ACAD9	592.84	677	0.19121	3545.3	10358	0.82693	0.79586	0.20414	0.40828	0.60751	TRUE	136	163	425	546
ACAD9_36273_GAAGATAAATTAGGCATTCG	ACAD9	476.59	440.19	-0.11438	662.85	7728.8	0.41408	0.33941	0.66059	0.67882	0.817	FALSE	144	131	307	330
ACAD9_36274_GGACTCCCGAAAAATTGACC	ACAD9	182.82	331.34	0.85437	11269	2147.2	3.2051	0.99933	0.00067499	0.00135	0.010326	TRUE	62	40	111	307
ACADL_100_TAAAATGGGATTAAAAGCCC	ACADL	187.04	161.37	-0.21178	330	2213.6	0.54567	0.29262	0.70738	0.58524	0.75031	FALSE	72	62	105	107
ACADL_97_CAGAAAAAGGCTAATACCAT	ACADL	38.043	223.44	2.5232	20150	269.2	11.3	1	6.6616e-30	1.3323e-29	1.0485e-27	TRUE	18	40	18	194
ACADL_98_CTCCTCCCAGACAATAGCTG	ACADL	202.9	224.39	0.14461	231.19	2467.1	0.43279	0.66741	0.33259	0.66518	0.80756	TRUE	65	57	127	178
ACADL_99_GCCACTTACTCTGAGTGATG	ACADL	161.68	148.96	-0.1175	80.989	1823.1	0.29801	0.3828	0.6172	0.7656	0.87287	FALSE	67	43	86	113
ACADM_101_AAGATGTGGATAACCAACGG	ACADM	139.49	278.82	0.99402	9991.1	1498.1	3.5997	0.99984	0.00015929	0.00031858	0.0030866	TRUE	62	50	70	242
ACADM_102_AATTGGCTTATGGATGTACA	ACADM	427.98	294.1	-0.53973	9041.1	6690.9	1.6368	0.050837	0.94916	0.10167	0.25159	FALSE	134	124	271	184
ACADM_103_ATTGTGGAAGCAGATACCCC	ACADM	116.24	173.78	0.57608	1672.1	1175.9	1.6781	0.95332	0.046684	0.093368	0.23749	TRUE	18	20	92	162
ACADM_104_GTATTTGGGGAGAATGACTG	ACADM	250.45	335.16	0.41886	3606.5	3267.4	1.4819	0.93082	0.069185	0.13837	0.30905	TRUE	105	75	132	276
ACADS_105_ACACACCATCTACCAGTCTG	ACADS	1380.1	927.17	-0.57337	103590	32278	2.5211	0.0058492	0.99415	0.011698	0.055613	FALSE	304	251	1002	720
ACADS_106_GACACTCATGATGACTCCGG	ACADS	239.88	251.13	0.065831	63.248	3084.6	0.20249	0.58023	0.41977	0.83954	0.91742	TRUE	98	73	129	190
ACADS_107_GGCAGGTACCTGGTTCGCTG	ACADS	421.64	365.71	-0.20479	1566.1	6558.5	0.69064	0.24489	0.75511	0.48979	0.67885	FALSE	88	84	311	299
ACADS_108_TAAGGAACATCTCTTCCCAG	ACADS	369.86	148.96	-1.3063	25617	5502.9	2.9779	0.0014509	0.99855	0.0029019	0.019072	FALSE	77	69	273	87
ACADSB_109_AGCCAAAGTTGATGCATCTG	ACADSB	112.02	258.77	1.2007	11226	1119.5	4.3861	0.99999	5.7725e-06	1.1545e-05	0.00016226	TRUE	58	41	48	230
ACADSB_110_ATGGAGAAATCAGTAATACA	ACADSB	104.62	196.7	0.90446	4343.4	1022.5	2.8797	0.99801	0.0019911	0.0039822	0.024542	TRUE	22	27	77	179
ACADSB_111_ATTGAGTAGAGCTTCTGACT	ACADSB	246.22	317.01	0.36328	2515.7	3194	1.2526	0.89482	0.10518	0.21035	0.40446	TRUE	73	92	160	240
ACADSB_112_TTCGAATGTTAACGGGCAGG	ACADSB	504.07	396.27	-0.34637	5831.6	8332.1	1.181	0.1188	0.8812	0.2376	0.43641	FALSE	178	161	299	254
ACADVL_113_CACTAATCGTACCCAGTTTG	ACADVL	323.36	259.72	-0.31511	2031.3	4597.4	0.93863	0.17396	0.82604	0.34792	0.55211	FALSE	72	60	234	212
ACADVL_114_GTCTAACCGAGCCCTCAAGC	ACADVL	38.043	106.94	1.4672	2524.9	269.2	4.1995	0.99999	1.3516e-05	2.7031e-05	0.00035182	TRUE	30	37	6	75
ACADVL_115_GTGGAGGAGACCACTTGGCA	ACADVL	92.994	156.6	0.7456	2056.6	874.71	2.1505	0.98423	0.01577	0.031539	0.11389	TRUE	26	44	62	120
ACADVL_116_TCCTGGTCAGAGCGTCAGAG	ACADVL	184.93	126.04	-0.54947	1749.8	2180.3	1.2612	0.10359	0.89641	0.20718	0.40061	FALSE	94	73	81	59
ACAN_493_CAGCGGTCACCTGCACGACG	ACAN	319.14	177.6	-0.84193	10228	4517.2	2.1058	0.017608	0.98239	0.035216	0.12296	FALSE	51	52	251	134
ACAN_494_CCTGCGCTCCAATGACTCTG	ACAN	140.55	161.37	0.19801	217.07	1513.2	0.53532	0.70374	0.29626	0.59252	0.75561	TRUE	81	59	52	110
ACAN_495_GAACCAGCCTATACCCCAGT	ACAN	314.91	528.99	0.74645	23296	4437.4	3.2138	0.99935	0.000655	0.00131	0.010084	TRUE	93	47	205	507
ACAN_496_GAGGGCAGTTCACCAACCGT	ACAN	73.972	133.68	0.84511	1820.9	646.2	2.3488	0.99057	0.0094339	0.018868	0.078691	TRUE	34	36	36	104
ACAP1_25821_AGGTCTGCGGGGTTTCCGAG	ACAP1	392.05	467.88	0.2545	2880.5	5949.4	0.98308	0.83722	0.16278	0.32557	0.53034	TRUE	169	160	202	330
ACAP1_25822_CAGAACCAAGCTTAAGAGAG	ACAP1	198.67	140.36	-0.49819	1712.4	2398.8	1.1904	0.11692	0.88308	0.23383	0.43191	FALSE	62	37	126	110
ACAP1_25823_GTCACAAATGCCGACAACGA	ACAP1	117.3	240.62	1.0303	7844.5	1190.1	3.5749	0.99982	0.00017523	0.00035046	0.0033497	TRUE	46	40	65	212
ACAP1_25824_TGCCGGAACACTGAATGCAG	ACAP1	362.46	255.9	-0.50059	5720.5	5356.1	1.4561	0.072687	0.92731	0.14537	0.31917	FALSE	69	59	274	209
ACAP2_33055_ACTATAGGATAATCCGACTG	ACAP2	400.51	365.71	-0.13078	605.7	6121.9	0.44472	0.32826	0.67174	0.65652	0.80175	FALSE	132	104	247	279
ACAP2_33056_ATATATCAGAGCAAAATATG	ACAP2	95.107	142.27	0.57606	1123.5	901.14	1.5712	0.94189	0.058109	0.11622	0.2747	TRUE	55	67	35	82
ACAP2_33057_TCCGGAGCACTCGATACACA	ACAP2	435.38	688.45	0.65987	32440	6846.4	3.0586	0.99889	0.001112	0.002224	0.015401	TRUE	114	162	298	559
ACAP2_33058_TGAACTTGGACCCTACATGA	ACAP2	626.65	275.95	-1.1803	64008	11159	3.3199	0.00045027	0.99955	0.00090053	0.0074384	FALSE	124	106	469	183
ACAP3_57857_CCTCGCTATAGCAACTGTCA	ACAP3	500.9	391.49	-0.35473	6007.5	8261.8	1.2037	0.11436	0.88564	0.22872	0.42584	FALSE	134	137	340	273
ACAP3_57858_CTCCACTTTGGACTCATCGT	ACAP3	413.19	611.11	0.5635	19773	6382.9	2.4773	0.99338	0.0066184	0.013237	0.060893	TRUE	127	114	264	526
ACAP3_57859_CTGGATCAAGGACAAATACG	ACAP3	421.64	495.57	0.23257	2737.2	6558.5	0.91289	0.81935	0.18065	0.3613	0.5646	TRUE	134	135	265	384
ACAP3_57860_GTTCGCTGACAGCCTACAGG	ACAP3	606.57	841.23	0.47116	27715	10681	2.2705	0.98841	0.011589	0.023177	0.091287	TRUE	212	174	362	707
ACAT1_117_CTGCCTAAAAAAGATCCAAT	ACAT1	45.44	108.85	1.2421	2103.3	339.94	3.4394	0.99971	0.00029353	0.00058706	0.0051987	TRUE	3	6	40	108
ACAT1_118_GAAGTGAAAGAAGCATACAT	ACAT1	135.26	41.059	-1.6959	4808.2	1438	2.4842	0.0063126	0.99369	0.012625	0.058778	FALSE	28	28	100	15
ACAT1_119_GAGGATCAACACCATATGGT	ACAT1	317.02	517.53	0.7053	20401	4477.2	2.9966	0.99863	0.001365	0.00273	0.018157	TRUE	138	177	162	365
ACAT1_120_TTCTGCGCAGGATGTGATGG	ACAT1	311.74	518.49	0.73213	21714	4377.7	3.1248	0.99911	0.00088973	0.0017795	0.01289	TRUE	93	113	202	430
ACAT2_121_CCTGTTAGACAAGCCAGTGT	ACAT2	206.07	228.21	0.14659	245.37	2518.6	0.44127	0.67049	0.32951	0.65903	0.80359	TRUE	49	31	146	208
ACAT2_122_GCAGTCCAGTCAATAGGGAT	ACAT2	218.75	127	-0.77974	4285.8	2727.4	1.7568	0.039459	0.96054	0.078917	0.21259	FALSE	107	73	100	60
ACAT2_123_GTTCTCAAGTAAGCCAAGTG	ACAT2	266.3	232.99	-0.19204	555.56	3546.5	0.55942	0.28793	0.71207	0.57587	0.74354	FALSE	48	62	204	182
ACAT2_124_TCTATGTTGCTCCCATGGCG	ACAT2	222.97	332.29	0.57345	6034.1	2797.9	2.0667	0.98062	0.019383	0.038767	0.13129	TRUE	85	80	126	268
ACBD3_47931_AAGAGAACGTCTGCAAAAGG	ACBD3	719.65	574.83	-0.32366	10519	13438	1.2493	0.10578	0.89422	0.21156	0.40599	FALSE	181	212	500	390
ACBD3_47932_ACATCAAAGAATCCAACCTC	ACBD3	207.12	143.23	-0.52907	2058.4	2535.8	1.2688	0.10224	0.89776	0.20447	0.39727	FALSE	49	54	147	96
ACBD3_47933_GGGCCGCGACCGGATCCAGG	ACBD3	407.9	380.99	-0.098234	362.33	6273.8	0.33981	0.367	0.633	0.734	0.85258	FALSE	140	136	246	263
ACBD3_47934_TGCGTCCCACAAAATAGAGA	ACBD3	104.62	161.37	0.62044	1629.2	1022.5	1.7749	0.96202	0.037981	0.075962	0.20703	TRUE	61	58	38	111
ACBD4_49907_ACCACTTATATCGTCCAATG	ACBD4	314.91	439.24	0.47876	7781.5	4437.4	1.8664	0.969	0.030996	0.061992	0.18087	TRUE	117	79	181	381
ACBD4_49908_AGGTGATCCCTGACATGCCG	ACBD4	508.3	393.4	-0.36884	6627.3	8425.9	1.2517	0.10535	0.89465	0.21069	0.4049	FALSE	143	134	338	278
ACBD4_49909_CAGGGAATCACAGAAAACCT	ACBD4	406.85	341.84	-0.2505	2117	6252	0.82216	0.20549	0.79451	0.41098	0.60947	FALSE	94	71	291	287
ACBD4_49910_GTGATCGACACAGTGCCCCT	ACBD4	382.54	445.92	0.22063	2011.2	5757	0.83528	0.79822	0.20178	0.40356	0.60353	TRUE	147	136	215	331
ACBD5_55853_ACTGGGTGATATGACCAAAG	ACBD5	427.98	421.09	-0.023359	23.736	6690.9	0.08423	0.46644	0.53356	0.93287	0.96848	FALSE	164	119	241	322
ACBD5_55854_AGCCCATTGATGAAAACTTG	ACBD5	767.2	810.68	0.079423	945.29	14645	0.35927	0.6403	0.3597	0.7194	0.84362	TRUE	178	188	548	661
ACBD5_55855_AGGTAAAATAGTCCAACCTG	ACBD5	317.02	262.59	-0.27086	1485	4477.2	0.81357	0.20794	0.79206	0.41589	0.6138	FALSE	125	92	175	183
ACBD5_55856_TGGTCATTCCAGTCAACCCA	ACBD5	883.44	727.6	-0.27963	12171	17704	1.1712	0.12075	0.87925	0.24151	0.44101	FALSE	175	180	661	582
ACBD6_53475_AAATATATTTGATTACTGCA	ACBD6	225.09	136.54	-0.71698	3980.4	2833.4	1.6634	0.048104	0.9519	0.096209	0.24243	FALSE	122	125	91	18
ACBD6_53476_AGCCATCAAATCGAAAAATG	ACBD6	862.31	868.92	0.011014	21.885	17136	0.050539	0.52015	0.47985	0.95969	0.98091	TRUE	290	250	526	660
ACBD6_53477_CCTCGATCTCAGGGCTATGG	ACBD6	939.45	672.22	-0.48227	35954	19230	1.9271	0.026986	0.97301	0.053973	0.16472	FALSE	236	275	653	429
ACBD6_53478_TTAAAAAACTAGATCCAGGT	ACBD6	379.37	513.71	0.43636	9075.5	5693.2	1.7805	0.9625	0.0375	0.074999	0.20537	TRUE	137	129	222	409
ACBD7_72745_ACAGGGCTGCAGAAGATGTG	ACBD7	751.35	700.87	-0.1002	1274.5	14240	0.42304	0.33613	0.66387	0.67227	0.81247	FALSE	236	203	475	531
ACBD7_72746_CTGAAAGCAAGACCAGATGA	ACBD7	564.3	660.76	0.22729	4659.4	9694.4	0.97968	0.83638	0.16362	0.32724	0.53215	TRUE	273	205	261	487
ACBD7_72747_GAGAACTGAAAGAACTCTAT	ACBD7	86.653	288.37	1.723	22075	796.63	7.1468	1	4.4473e-13	8.8946e-13	2.955e-11	TRUE	66	70	16	232
ACBD7_72748_GCAAAGCCAAATGGGAAGCA	ACBD7	531.54	275.95	-0.94325	33524	8946.8	2.7021	0.0034447	0.99656	0.0068894	0.037335	FALSE	167	102	336	187
ACCS_54015_CCCAACAGACTTCTCAAACA	ACCS	128.92	244.44	0.91773	6840.2	1349.2	3.145	0.99917	0.0008305	0.001661	0.012196	TRUE	44	45	78	211
ACCS_54016_GGGGAGTATACATCACCCAG	ACCS	516.75	562.41	0.12194	1043	8614.4	0.49198	0.68863	0.31137	0.62273	0.7778	TRUE	132	118	357	471
ACCS_54017_TAGGTGGTTGTCCTGAATGG	ACCS	593.89	571.96	-0.054192	240.52	10383	0.21524	0.41479	0.58521	0.82958	0.91136	FALSE	180	176	382	423
ACCS_54018_TGTGATAGCGCCATAGTAAG	ACCS	1052.5	675.09	-0.63994	72099	22408	2.5214	0.0058443	0.99416	0.011689	0.055584	FALSE	174	118	822	589
ACCSL_71621_AAGTGACATGAACTGCATTG	ACCSL	602.35	343.75	-0.80744	34085	10582	2.5139	0.0059703	0.99403	0.011941	0.056411	FALSE	121	87	449	273
ACCSL_71622_GATCAACCTCCTACAGTCTG	ACCSL	494.56	358.07	-0.46478	9374.6	8121.9	1.5145	0.064954	0.93505	0.12991	0.29653	FALSE	142	97	326	278
ACCSL_71623_TCCCACGGATGGATAGGTCG	ACCSL	339.22	319.88	-0.084427	187.02	4901.4	0.27622	0.39119	0.60881	0.78238	0.88311	FALSE	109	72	212	263
ACCSL_71624_TCTTAGGGGAAAAAGGTCCG	ACCSL	361.41	407.73	0.17352	1073.6	5335.2	0.63412	0.737	0.263	0.52601	0.70727	TRUE	134	113	208	314
ACD_48371_AAGCAGCGTGGCCCCGACGT	ACD	481.88	700.87	0.53954	24187	7843.9	2.4726	0.99329	0.0067062	0.013412	0.061507	TRUE	132	187	324	547
ACD_48372_AGATGCACAGCATTGAGCTG	ACD	695.34	776.3	0.15868	3279.8	12832	0.71471	0.76261	0.23739	0.47479	0.66636	TRUE	160	148	498	665
ACD_48373_ATCCGCTGGGTGTAGCCGTG	ACD	559.02	456.42	-0.29195	5276.6	9572.8	1.0486	0.14718	0.85282	0.29436	0.49877	FALSE	129	107	400	371
ACD_48374_GCTTCTGGATGAAATGCGGG	ACD	434.32	295.05	-0.55624	9788.3	6824.1	1.6859	0.045904	0.9541	0.091808	0.23494	FALSE	144	108	267	201
ACE_4581_GGAAAACATCTACGACATGG	ACE	249.39	265.45	0.089678	128.97	3249	0.28173	0.61092	0.38908	0.77816	0.8805	TRUE	79	46	157	232
ACE_4582_GGTGTGGAACGAGTATGCCG	ACE	84.54	132.73	0.64461	1175.5	771.01	1.7353	0.95861	0.041388	0.082776	0.21953	TRUE	45	70	35	69
ACE_4583_GTTGTAGAAGTCCCAAGCCG	ACE	259.96	412.5	0.66406	11788	3434.1	2.603	0.99538	0.0046207	0.0092414	0.046699	TRUE	88	72	158	360
ACE_4584_GTTTCGTTTCGGGTAACAGG	ACE	227.2	242.53	0.093821	117.59	2868.9	0.28627	0.61266	0.38734	0.77468	0.87832	TRUE	97	87	118	167
ACE2_46731_AACATCTTCATGCCTATGTG	ACE2	418.47	584.37	0.48078	13857	6492.5	2.0589	0.98025	0.01975	0.039499	0.133	TRUE	171	194	225	418
ACE2_46732_CAGGATCCTTATGTGCACAA	ACE2	251.51	74.479	-1.7422	17033	3285.8	3.0883	0.0010008	0.999	0.0020016	0.014146	FALSE	49	16	189	62
ACE2_46733_CCAAAGGCGAGAGATAGTTG	ACE2	300.12	279.77	-0.10091	206.97	4160.8	0.31537	0.37624	0.62376	0.75248	0.86484	FALSE	137	148	147	145
ACE2_46734_TGCACAGAGAATATTCAAGG	ACE2	81.37	103.12	0.33813	237.47	732.99	0.80355	0.78889	0.21111	0.42222	0.61937	TRUE	41	33	36	75
ACER1_58989_CCCAGACAACGTAAATGTAG	ACER1	194.44	347.57	0.83471	11968	2331	3.1716	0.99924	0.00075796	0.0015159	0.011324	TRUE	52	56	132	308
ACER1_58990_GAAGACCAGGCGGATGAACT	ACER1	142.66	119.36	-0.25534	272.07	1543.5	0.59315	0.27644	0.72356	0.55287	0.72789	FALSE	32	26	103	99
ACER1_58991_GGTGGCCGAGTTCTACAACA	ACER1	17.965	27.691	0.59728	47.844	101.09	0.96738	0.82692	0.17308	0.34616	0.55034	TRUE	15	3	2	26
ACER1_58992_TGGACGAGATCGCCATCCTG	ACER1	169.08	274.04	0.69346	5588.3	1935	2.3862	0.99149	0.0085127	0.017025	0.073243	TRUE	62	82	98	205
ACER2_69181_ATACCTTCTGGGGAACCACA	ACER2	75.029	89.757	0.25545	108.67	658.43	0.57396	0.71651	0.28349	0.56698	0.73894	TRUE	46	42	25	52
ACER2_69182_ATTCAGGGGTAGGTTCAAGG	ACER2	209.24	160.42	-0.38122	1196.9	2570.4	0.96293	0.16778	0.83222	0.33555	0.53999	FALSE	66	20	132	148
ACER2_69183_CATCTGACCCAAGAAACTAA	ACER2	174.36	198.61	0.18684	294.28	2015.9	0.54004	0.7054	0.2946	0.5892	0.75285	TRUE	37	31	128	177
ACER2_69184_TATCGCCGAGTTCTACAACA	ACER2	337.1	333.25	-0.016551	7.4369	4860.6	0.055318	0.47794	0.52206	0.95588	0.97899	FALSE	65	126	254	223
ACER3_42351_AAAAGAGCCGATATTCCATC	ACER3	394.17	234.9	-0.74431	12894	5992.4	2.0575	0.019819	0.98018	0.039639	0.13333	FALSE	135	96	238	150
ACER3_42352_CTCGGCGATGTACCAGGTCA	ACER3	233.54	200.52	-0.21892	545.98	2976.3	0.60527	0.27249	0.72751	0.54499	0.72149	FALSE	105	49	116	161
ACER3_42353_TAAGCCATGGATAAACCCTG	ACER3	135.26	246.35	0.86017	6306.9	1438	2.9295	0.9983	0.001698	0.003396	0.021565	TRUE	45	40	83	218
ACER3_42354_TATTAAACTGAATAGAACTA	ACER3	34.873	34.375	-0.020158	0.12387	240.17	0.032117	0.48085	0.51915	0.96169	0.98159	FALSE	17	36	16	0
ACHE_133_GGTGTCCATGAACTACCGGG	ACHE	174.36	283.59	0.69855	6052.9	2015.9	2.4328	0.99251	0.0074921	0.014984	0.066724	TRUE	30	64	135	233
ACHE_134_TATGTGGACACCCTATACCC	ACHE	178.59	161.37	-0.14541	148.34	2081.3	0.37744	0.35289	0.64711	0.70579	0.83469	FALSE	58	33	111	136
ACHE_135_TGGTGGGAATGACACAGAGC	ACHE	101.45	159.46	0.64734	1704.1	981.6	1.8517	0.96794	0.032056	0.064112	0.18478	TRUE	50	63	46	104
ACHE_136_TGTCCTCGTCTGGATCTATG	ACHE	196.56	384.81	0.96563	18210	2364.8	3.8712	0.99995	5.4157e-05	0.00010831	0.0012123	TRUE	74	86	112	317
ACIN1_31375_CCTGGTCAAGCGGCTCAAAG	ACIN1	306.46	259.72	-0.23787	1094	4278.8	0.71447	0.23747	0.76253	0.47494	0.6664	FALSE	121	83	169	189
ACIN1_31376_CGTACTCATGCCAACCCTCG	ACIN1	358.24	237.76	-0.58938	7333.1	5272.6	1.6592	0.04854	0.95146	0.097079	0.24398	FALSE	47	54	292	195
ACIN1_31377_GAGGAATTAGCACTGGCCAA	ACIN1	270.53	392.45	0.53507	7496.1	3621.9	2.0259	0.97861	0.02139	0.04278	0.14047	TRUE	94	68	162	343
ACIN1_31378_TGAGGGACAAAAATCTAGGG	ACIN1	331.82	402.95	0.27944	2535.8	4758.9	1.0311	0.84876	0.15124	0.30248	0.50703	TRUE	100	65	214	357
ACKR1_6677_AGCTAGGATACCCAGGACAC	ACKR1	164.85	148.96	-0.14534	126.4	1870.9	0.36747	0.35659	0.64341	0.71318	0.83938	FALSE	35	43	121	113
ACKR1_6678_CAATGGCAACAAGACAAAGA	ACKR1	147.94	87.847	-0.74538	1836.1	1620	1.4931	0.067589	0.93241	0.13518	0.30445	FALSE	64	41	76	51
ACKR1_6679_CTGCACCCTGATATACAGCA	ACKR1	35.929	64.93	0.83617	429.56	249.76	1.8351	0.96637	0.033634	0.067267	0.19087	TRUE	11	16	23	52
ACKR1_6680_GAAGGAATCATTCACACCAT	ACKR1	243.05	379.08	0.63911	9364.9	3139.2	2.4278	0.99241	0.0075948	0.01519	0.067379	TRUE	56	80	174	317
ACKR2_3469_ATCTCAACCATCCGCCTGCG	ACKR2	751.35	601.56	-0.32029	11253	14240	1.2552	0.1047	0.8953	0.20939	0.40346	FALSE	237	256	474	374
ACKR2_3470_CAGCCCATACTATGGTAGCA	ACKR2	715.42	608.25	-0.23378	5752.5	13332	0.92819	0.17666	0.82334	0.35331	0.55715	FALSE	291	292	386	345
ACKR2_3471_CATGCCCGCCGAAATCTGCG	ACKR2	867.59	592.97	-0.54829	38048	17278	2.0893	0.018342	0.98166	0.036685	0.12639	FALSE	206	195	615	426
ACKR2_3472_GGAGTGGAAGGAGAAACCCT	ACKR2	194.44	260.68	0.42105	2205.3	2331	1.3719	0.91495	0.085052	0.1701	0.35282	TRUE	93	61	91	212
ACKR3_44835_AAGACAGCGATAATGGAGAA	ACKR3	546.34	465.97	-0.2291	3234.6	9282.5	0.83415	0.2021	0.7979	0.40419	0.60384	FALSE	199	188	318	300
ACKR3_44836_CCAACAATGAGACCTACTGC	ACKR3	496.67	175.69	-1.4939	54837	8168.5	3.5514	0.00019155	0.99981	0.0003831	0.0036104	FALSE	50	59	420	125
ACKR3_44837_GCACTGCTACATCTTGAACC	ACKR3	194.44	222.48	0.19342	393.58	2331	0.58079	0.7193	0.2807	0.5614	0.73427	TRUE	97	84	87	149
ACKR3_44838_GGTCCACGCTCATGCACGTG	ACKR3	1375.9	863.19	-0.67198	133200	32145	2.8596	0.002121	0.99788	0.004242	0.025759	FALSE	234	231	1068	673
ACKR4_39015_AGTCCCCAGCCAATCAGGAG	ACKR4	1323	951.04	-0.47586	69664	30492	2.1304	0.01657	0.98343	0.03314	0.11777	FALSE	244	219	1008	777
ACKR4_39016_ATTGATGTTCCTAGGTAGCG	ACKR4	1081.1	953.9	-0.18034	8091.3	23229	0.83424	0.20207	0.79793	0.40414	0.6038	FALSE	334	407	689	592
ACKR4_39017_CAATGACGAAAACTATTGTG	ACKR4	694.28	796.35	0.19762	5215.2	12806	0.90198	0.81647	0.18353	0.36707	0.56993	TRUE	222	275	435	559
ACKR4_39018_TGTGCTACTTTATCACAGCA	ACKR4	505.13	619.7	0.29441	6581.2	8355.5	1.2535	0.89498	0.10502	0.21003	0.40408	TRUE	189	162	289	487
ACLY_137_AGAGCAATTCGAGATTACCA	ACLY	30.646	55.382	0.83322	312.51	202.79	1.737	0.95815	0.041847	0.083695	0.22125	TRUE	15	12	14	46
ACLY_138_CGGTCACCTGTACACGACAG	ACLY	166.97	171.87	0.041556	12.047	1902.9	0.11252	0.54477	0.45523	0.91047	0.95693	TRUE	18	22	140	158
ACLY_139_GACCAGCTGATCAAACGTCG	ACLY	262.07	377.17	0.52357	6678.1	3471.5	1.9535	0.97462	0.025383	0.050766	0.15803	TRUE	86	75	162	320
ACLY_140_GCCAGCGGGAGCACATCGGT	ACLY	10.567	8.5937	-0.26991	1.9529	50.893	0.27667	0.3457	0.6543	0.6914	0.82516	FALSE	5	9	5	0
ACMSD_59757_AGTGGTGCGAGAGAATTGCT	ACMSD	117.3	141.32	0.26669	289.11	1190.1	0.69629	0.75679	0.24321	0.48641	0.67574	TRUE	65	33	46	115
ACMSD_59758_CCTCCTGGGGTAGCTCACAA	ACMSD	574.87	435.42	-0.40004	9770.6	9938.8	1.3988	0.080931	0.91907	0.16186	0.34198	FALSE	220	108	324	348
ACMSD_59759_CGAGTGGGACCTGAACGCGC	ACMSD	162.74	289.32	0.82626	8175	1839	2.9518	0.99842	0.0015799	0.0031598	0.020415	TRUE	64	71	90	232
ACMSD_59760_CTGCAGAGGTTTGGCTACGG	ACMSD	75.029	51.562	-0.53252	277.74	658.43	0.91453	0.1788	0.8212	0.3576	0.56109	FALSE	38	30	33	24
ACO1_141_CCTGCCCCTAACATCACAGA	ACO1	80.313	274.04	1.7581	20425	720.43	7.2178	1	2.6451e-13	5.2902e-13	1.7859e-11	TRUE	39	49	37	238
ACO1_142_CTTGGTGTCTAGGTTTGACG	ACO1	158.51	199.57	0.33041	845.48	1775.7	0.97423	0.83502	0.16498	0.32997	0.5347	TRUE	48	47	102	162
ACO1_143_TTATTACCCAGACAGCCTCG	ACO1	253.62	261.63	0.044697	32.098	3322.7	0.13899	0.55527	0.44473	0.88946	0.94528	TRUE	79	74	161	200
ACO1_144_TTGCATATGCTATTACTAAG	ACO1	159.57	145.14	-0.13586	104.18	1791.5	0.34093	0.36653	0.63347	0.73305	0.85193	FALSE	26	21	125	131
ACO2_149_ATCTTCTCCGAGAGTGTCAG	ACO2	1203.6	1122.9	-0.10006	3258.9	26844	0.49268	0.31112	0.68888	0.62224	0.77738	FALSE	338	298	801	878
ACO2_150_GTCTCAATAGGACATCAACC	ACO2	415.3	697.05	0.74569	40348	6426.7	3.5145	0.99978	0.00022029	0.00044058	0.0040661	TRUE	105	159	288	571
ACO2_151_GTGCAGCTACCAATTAGACC	ACO2	287.44	323.7	0.17085	658.04	3927.5	0.57862	0.71858	0.28142	0.56285	0.73564	TRUE	90	73	182	266
ACO2_152_TCTCGGGGTTTGCGTCGTTG	ACO2	19.021	21.962	0.19769	4.3282	108.88	0.28179	0.59719	0.40281	0.80562	0.89789	TRUE	9	19	9	4
ACOT1_73650_ACAATGCCAGGAAAGGGCCC	ACOT1	724.93	453.56	-0.67536	37322	13571	2.3295	0.0099166	0.99008	0.019833	0.081434	FALSE	162	166	524	309
ACOT1_73651_AGCCCGAGAAACCCTTGGTG	ACOT1	146.89	288.37	0.9684	10287	1604.6	3.5319	0.99979	0.00020632	0.00041264	0.0038496	TRUE	55	61	84	241
ACOT1_73652_CTACTTGCTCAGTCATCCTG	ACOT1	227.2	175.69	-0.36905	1331.9	2868.9	0.96162	0.16811	0.83189	0.33622	0.54056	FALSE	80	86	135	98
ACOT1_73653_GGGGGAACCTTACGCTACAA	ACOT1	63.405	63.021	-0.0086309	0.073786	527.19	0.016731	0.49186	0.50814	0.98373	0.99208	FALSE	28	27	32	39
ACOT11_34379_AGCTGAAGCAGATCACGCCG	ACOT11	525.2	516.58	-0.023842	37.194	8804	0.091919	0.46338	0.53662	0.92676	0.96528	FALSE	161	125	336	416
ACOT11_34380_ATCTGCGTCCAGGACCACAA	ACOT11	881.33	579.6	-0.60377	46016	17647	2.2713	0.011563	0.98844	0.023126	0.091154	FALSE	181	173	653	434
ACOT11_34381_GCCAACTGCGCCATTCAGGG	ACOT11	611.86	702.78	0.19957	4138.1	10807	0.87461	0.80911	0.19089	0.38179	0.58342	TRUE	172	148	407	588
ACOT11_34382_GGGATACCGGAACCCCACGG	ACOT11	424.81	423	-0.0061452	1.6379	6624.6	0.022237	0.49113	0.50887	0.98226	0.99145	FALSE	141	120	261	323
ACOT12_60277_AGCATTCAGCACAAGCATGG	ACOT12	225.09	70.66	-1.6576	12869	2833.4	2.9012	0.0018472	0.99815	0.0036943	0.023068	FALSE	32	19	181	55
ACOT12_60278_CCACCCCATGCAAACCATCA	ACOT12	277.92	305.56	0.13627	381.93	3754.8	0.45091	0.67397	0.32603	0.65205	0.79852	TRUE	155	80	108	240
ACOT12_60279_GATGATTTCAGACGCTATCG	ACOT12	357.18	288.37	-0.30778	2374.4	5251.8	0.94955	0.17117	0.82883	0.34234	0.5467	FALSE	22	36	316	266
ACOT12_60280_GTAGATATGTTTAAGTTCCG	ACOT12	142.66	224.39	0.64977	3382.4	1543.5	2.0803	0.98125	0.01875	0.037501	0.12824	TRUE	77	78	58	157
ACOT13_43587_ACGTGGCTGTCAAACCGCCG	ACOT13	92.994	155.64	0.73683	1994.5	874.71	2.1183	0.98291	0.017091	0.034182	0.12038	TRUE	44	57	44	106
ACOT13_43588_AGTAGATAACATATCAACAA	ACOT13	87.71	67.795	-0.36679	199.12	809.51	0.69995	0.2412	0.7588	0.4824	0.67274	FALSE	28	36	55	35
ACOT13_43589_GGTGATAAAGGCCATGACCA	ACOT13	292.72	208.16	-0.48983	3601	4024.3	1.333	0.09127	0.90873	0.18254	0.36923	FALSE	70	68	207	150
ACOT13_43590_GTTCATATCGACACTGACTC	ACOT13	419.53	406.77	-0.044449	81.398	6514.5	0.15808	0.4372	0.5628	0.8744	0.93689	FALSE	77	92	320	334
ACOT2_29699_AGATCATTAGGGTTCCTGCT	ACOT2	863.36	666.49	-0.37289	19460	17165	1.5027	0.066462	0.93354	0.13292	0.30116	FALSE	194	168	623	530
ACOT2_29700_CTACTTGCTCAGTCATCCCG	ACOT2	592.84	611.11	0.043728	166.99	10358	0.17956	0.57125	0.42875	0.8575	0.92799	TRUE	211	203	350	437
ACOT2_29701_GCTCGCCAAGAGTGTCGGCG	ACOT2	745.01	615.88	-0.27419	8355.2	14078	1.0882	0.13824	0.86176	0.27648	0.47983	FALSE	194	204	511	441
ACOT2_29702_GGTACAGCCGGGACGCTCGA	ACOT2	928.88	731.42	-0.34437	19564	18939	1.4348	0.075671	0.92433	0.15134	0.32752	FALSE	241	210	638	556
ACOT4_58565_ATAATAAGCTAGAGCCAACG	ACOT4	175.42	101.22	-0.78741	2804.5	2032.2	1.6461	0.049828	0.95017	0.099656	0.24826	FALSE	59	55	107	51
ACOT4_58566_ATGTCAATGATCCCTGGGAA	ACOT4	369.86	308.42	-0.26132	1891.5	5502.9	0.82827	0.20376	0.79624	0.40752	0.6068	FALSE	71	70	279	253
ACOT4_58567_CAGTTTCCATCAATGGATCT	ACOT4	982.78	892.79	-0.13839	4050.7	20433	0.6295	0.26451	0.73549	0.52902	0.70988	FALSE	167	182	763	753
ACOT4_58568_TCGCGGGACTCGAGCCCATG	ACOT4	379.37	273.09	-0.47276	5686	5693.2	1.4086	0.079477	0.92052	0.15895	0.338	FALSE	161	164	198	122
ACOT6_73654_ACAGGCATTGATAAGTACAG	ACOT6	424.81	414.41	-0.035686	54.12	6624.6	0.12782	0.44914	0.55086	0.89829	0.9504	FALSE	141	115	261	319
ACOT6_73655_ATCATATCCTTGTAATGTAG	ACOT6	500.9	277.86	-0.84783	25404	8261.8	2.4538	0.0070684	0.99293	0.014137	0.063868	FALSE	129	97	345	194
ACOT6_73656_CTGAAAGGCTACAAGCTCAT	ACOT6	495.61	592.97	0.25826	4748.3	8145.2	1.0787	0.85964	0.14036	0.28072	0.48452	TRUE	194	212	275	409
ACOT6_73657_TTGGCATGGATGATCAAAGC	ACOT6	480.82	521.35	0.11653	821.8	7820.8	0.45833	0.67664	0.32336	0.64671	0.7947	TRUE	146	92	309	454
ACOT7_30783_AGCGCATGGAGACCAAGTGG	ACOT7	392.05	455.47	0.21579	2013.5	5949.4	0.82215	0.7945	0.2055	0.41099	0.60947	TRUE	105	102	266	375
ACOT7_30784_CAGGGGCACATACCACAGGG	ACOT7	332.88	167.1	-0.98999	14140	4779.2	2.398	0.0082425	0.99176	0.016485	0.071529	FALSE	82	88	233	87
ACOT7_30785_GCGGCCAGATGATGCCAACG	ACOT7	120.47	114.58	-0.07166	17.326	1233	0.16763	0.43327	0.56673	0.86653	0.9329	FALSE	22	45	92	75
ACOT7_30786_GTCTCCCATGTGCATCGGTG	ACOT7	193.38	278.82	0.52558	3679.8	2314.1	1.776	0.96213	0.037869	0.075738	0.20672	TRUE	85	76	98	216
ACOT8_26701_ATTACTGGGTACCGGCCAAG	ACOT8	336.05	423	0.33113	3793.2	4840.2	1.2499	0.89433	0.10567	0.21134	0.40574	TRUE	66	72	252	371
ACOT8_26702_CCTTAAATACTGGTCAATGA	ACOT8	107.79	119.36	0.1458	66.966	1063.8	0.35471	0.63843	0.36157	0.72315	0.84583	TRUE	27	29	75	96
ACOT8_26703_TCGTGACCAAGACGCTACGG	ACOT8	140.55	188.11	0.41792	1136.9	1513.2	1.2226	0.88925	0.11075	0.2215	0.41739	TRUE	36	33	97	164
ACOT8_26704_TTACTGGCTTGATCTCAATG	ACOT8	341.33	462.15	0.4361	7340.7	4942.3	1.7186	0.95716	0.04284	0.08568	0.22475	TRUE	94	87	229	397
ACOT9_33275_AAGAGGAGCTCTTTAGACAA	ACOT9	579.1	587.24	0.020105	33.136	10037	0.081257	0.53238	0.46762	0.93524	0.96949	TRUE	163	164	385	451
ACOT9_33276_CTTACCAATCTTATCCACCA	ACOT9	207.12	401.04	0.94991	19306	2535.8	3.8509	0.99994	5.8851e-05	0.0001177	0.0013023	TRUE	59	90	137	330
ACOT9_33277_GAGAAACATCTCATGTATGG	ACOT9	640.39	680.81	0.08818	817.3	11489	0.37716	0.64697	0.35303	0.70606	0.8349	TRUE	170	219	436	494
ACOT9_33278_TCTTCCCGACCCAGCTAACA	ACOT9	908.8	589.15	-0.62448	51685	18391	2.3571	0.0092086	0.99079	0.018417	0.077417	FALSE	133	137	727	480
ACOX1_153_ACCTATCACCGGATTAACGA	ACOX1	179.65	234.9	0.38497	1533	2097.7	1.2063	0.88614	0.11386	0.22772	0.42467	TRUE	21	10	149	236
ACOX1_154_CTGTGGTTTCCAAGCCTCGA	ACOX1	363.52	685.59	0.91344	53147	5377	4.3922	0.99999	5.6114e-06	1.1223e-05	0.00015809	TRUE	105	148	239	570
ACOX1_155_GCGCCGCCGAGAGATCGGTG	ACOX1	179.65	197.66	0.1371	162.25	2097.7	0.3932	0.6529	0.3471	0.6942	0.82688	TRUE	58	51	112	156
ACOX1_156_TGGCATTGAAGCATGTCGGA	ACOX1	336.05	215.8	-0.63659	7317.6	4840.2	1.7284	0.041957	0.95804	0.083914	0.22161	FALSE	80	69	238	157
ACOX2_21553_GACCATCTTCTAACCAACCC	ACOX2	272.64	244.44	-0.15689	397.83	3659.7	0.4661	0.32057	0.67943	0.64114	0.79059	FALSE	40	60	218	196
ACOX2_21554_GCATAACTGATGGCCAGCTG	ACOX2	551.62	684.63	0.31115	8871.8	9403.2	1.3717	0.91492	0.085082	0.17016	0.35288	TRUE	135	131	387	586
ACOX2_21555_GTGTATCACAAACTCCTGGG	ACOX2	427.98	372.4	-0.20022	1546.9	6690.9	0.67957	0.24839	0.75161	0.49678	0.68423	FALSE	131	81	274	309
ACOX2_21556_TGCTGTACCGAGTTTGACGT	ACOX2	706.96	463.11	-0.60922	30063	13121	2.1289	0.016631	0.98337	0.033262	0.11812	FALSE	110	154	559	331
ACOX3_21557_AAGCCACGGCAGTAATACCA	ACOX3	192.33	233.94	0.28124	867.87	2297.3	0.86819	0.80735	0.19265	0.3853	0.58675	TRUE	47	50	135	195
ACOX3_21558_CCGCACGCCTCACCTTAAAG	ACOX3	565.36	308.42	-0.87216	33755	9718.8	2.6063	0.0045761	0.99542	0.0091522	0.046355	FALSE	137	118	398	205
ACOX3_21559_GATCCCAACTGCACATACGA	ACOX3	189.16	123.18	-0.6148	2201.6	2247	1.3919	0.08194	0.91806	0.16388	0.34484	FALSE	30	33	149	96
ACOX3_21560_GCGTCAGTTTGGACCCACAG	ACOX3	211.35	194.79	-0.11712	137.14	2605.1	0.32442	0.3728	0.6272	0.7456	0.86033	FALSE	81	68	119	136
ACOXL_42215_AAGCCACAGCTAATCTCGAA	ACOXL	184.93	94.531	-0.96072	4198.8	2180.3	1.936	0.026396	0.9736	0.052793	0.16229	FALSE	66	41	109	58
ACOXL_42216_ACAGGAACGATGAAACAGTG	ACOXL	359.29	142.27	-1.3304	24767	5293.4	2.9828	0.0014275	0.99857	0.002855	0.018815	FALSE	117	73	223	76
ACOXL_42217_ATGTTTGCAATGACCGAGAG	ACOXL	185.99	168.06	-0.14545	160.89	2196.9	0.38259	0.35099	0.64901	0.70198	0.8321	FALSE	80	67	96	109
ACOXL_42218_TGACAAGGTTCGGATACCCA	ACOXL	248.34	101.22	-1.2865	11349	3230.6	2.5884	0.004815	0.99519	0.0096299	0.048148	FALSE	40	44	195	62
ACP1_157_ACATAGTATATAATCAAATG	ACP1	68.689	22.917	-1.5429	1122.3	585.94	1.8909	0.027106	0.97289	0.054213	0.16521	FALSE	15	16	50	8
ACP1_158_ACCCAGACACACAAACAGCA	ACP1	92.994	104.08	0.16085	61.497	874.71	0.37483	0.64581	0.35419	0.70837	0.83634	TRUE	19	39	69	70
ACP1_159_GGAACCCCCCTGACTACCGA	ACP1	515.69	507.03	-0.024393	37.521	8590.8	0.093461	0.46277	0.53723	0.92554	0.96476	FALSE	215	114	273	417
ACP1_160_GGGGTTCCCTATCTCATACC	ACP1	102.5	105.03	0.03484	3.2006	995.18	0.080199	0.53169	0.46831	0.93662	0.9699	TRUE	14	23	83	87
ACP2_161_ACATGGTGGCCAACGAGACA	ACP2	46.497	27.691	-0.72724	179.75	350.37	1.0047	0.15202	0.84798	0.30403	0.5083	FALSE	24	17	20	12
ACP2_162_ACCAGTGAAGACATATCCCA	ACP2	58.121	190.02	1.692	9417.3	470.03	6.0837	1	5.8935e-10	1.1787e-09	2.9617e-08	TRUE	13	21	42	178
ACP2_163_CACCTCTTATCACCGGCAAG	ACP2	274.75	335.16	0.28575	1828.6	3697.7	0.9933	0.83972	0.16028	0.32056	0.52515	TRUE	64	43	196	308
ACP2_164_TTCTGCAGCTGCTCATAACG	ACP2	357.18	349.48	-0.031362	29.663	5251.8	0.10628	0.45768	0.54232	0.91536	0.95915	FALSE	65	105	273	261
ACP5_165_ACCCACGGCTACAAAGCGCA	ACP5	386.77	378.12	-0.032529	37.373	5842.3	0.11311	0.45497	0.54503	0.90994	0.95673	FALSE	124	104	242	292
ACP5_166_CTGGACACAGTGACACTATG	ACP5	1111.7	811.63	-0.45339	45298	24120	1.9321	0.026674	0.97333	0.053347	0.16337	FALSE	258	267	794	583
ACP5_167_GCTCGGCTATGGACCACACG	ACP5	557.96	654.08	0.22892	4626.4	9548.5	0.98362	0.83735	0.16265	0.3253	0.53004	TRUE	138	145	390	540
ACP5_168_GTACCAGGGCACTTTGCGAA	ACP5	230.37	309.37	0.4238	3137.7	2922.5	1.4614	0.92805	0.071953	0.14391	0.31714	TRUE	98	113	120	211
ACP6_38135_AAAAAGGTGAAGGACAGGAT	ACP6	162.74	221.53	0.44258	1738.2	1839	1.3709	0.91479	0.085213	0.17043	0.35317	TRUE	30	50	124	182
ACP6_38136_ACAGTCACCAATCTAGCTGG	ACP6	252.56	411.54	0.70221	12824	3304.3	2.7657	0.99716	0.0028397	0.0056795	0.032238	TRUE	103	105	136	326
ACP6_38137_ACCAACCTTCAACCCACAGG	ACP6	83.483	88.802	0.088084	14.148	758.29	0.19315	0.57606	0.42394	0.84787	0.92245	TRUE	23	29	56	64
ACP6_38138_GCAGGTCGTGTTTCGACACG	ACP6	367.75	234.9	-0.64449	8934.8	5460.8	1.7978	0.036104	0.9639	0.072208	0.20033	FALSE	86	58	262	188
ACPP_169_AAAGGCAGGTATAGCAACTG	ACPP	555.85	399.13	-0.47681	12364	9500	1.6079	0.053929	0.94607	0.10786	0.26181	FALSE	103	120	423	298
ACPP_170_ACTCCTTGGCTAGTACACTT	ACPP	435.38	350.43	-0.31233	3618.6	6846.4	1.0266	0.1523	0.8477	0.30459	0.50891	FALSE	110	109	302	258
ACPP_171_CTACGACCCTTTATATTGTG	ACPP	329.71	272.13	-0.27593	1661	4718.4	0.83811	0.20098	0.79902	0.40197	0.60185	FALSE	116	128	196	157
ACPP_172_GCCATGAGGATTCCTTTATG	ACPP	421.64	676.04	0.6798	32806	6558.5	3.1413	0.99916	0.00084093	0.0016819	0.01232	TRUE	155	125	244	583
ACPT_56581_AGGCTGGTAGTGGAAGACCG	ACPT	310.68	252.08	-0.30047	1721.7	4357.9	0.8877	0.18735	0.81265	0.3747	0.57703	FALSE	91	76	203	188
ACPT_56582_TATCCTTGCAAACTTCTCCC	ACPT	203.95	203.39	-0.0039987	0.1609	2484.2	0.011382	0.49545	0.50455	0.9909	0.99568	FALSE	36	40	157	173
ACPT_56583_TCGCCATGGCGGAATACCTG	ACPT	678.43	474.57	-0.51469	20946	12414	1.8297	0.033646	0.96635	0.067292	0.19092	FALSE	154	145	488	352
ACPT_56584_TTGGATATTGGAGCCCACGT	ACPT	294.83	314.15	0.091252	186.6	4063.2	0.30303	0.61907	0.38093	0.76187	0.87068	TRUE	111	150	168	179
ACR_145_AAGCGCCCACACGAAATGGG	ACR	433.27	483.16	0.1569	1245.5	6801.9	0.60495	0.72739	0.27261	0.54521	0.72149	TRUE	133	122	277	384
ACR_146_CCCCGACACTTACTCACACG	ACR	154.29	217.71	0.49409	2026	1713	1.5324	0.93728	0.06272	0.12544	0.28925	TRUE	50	51	96	177
ACR_147_GAAAGCGCCTATGTGGTCGT	ACR	236.71	258.77	0.12801	243.34	3030.3	0.40065	0.65566	0.34434	0.68868	0.82361	TRUE	152	141	72	130
ACR_148_TAATGTGCATGACTGGAGAC	ACR	31.702	58.246	0.85733	360.28	211.99	1.8231	0.96535	0.034655	0.06931	0.1948	TRUE	9	2	21	59
ACRBP_53727_AAGAAGCGTTCGTATTCGGT	ACRBP	853.85	880.38	0.04409	351.89	16911	0.204	0.58082	0.41918	0.83836	0.91654	TRUE	247	248	561	674
ACRBP_53728_CAAACCAGGAGGCATAAGGG	ACRBP	640.39	615.88	-0.0562	300.27	11489	0.22862	0.40958	0.59042	0.81916	0.90555	FALSE	244	240	362	405
ACRBP_53729_GACTCTACTTCTCGTACCCG	ACRBP	169.08	323.7	0.93288	12263	1935	3.5149	0.99978	0.00021994	0.00043988	0.0040621	TRUE	78	78	82	261
ACRBP_53730_GGTGCTGTGCTATTCGATCG	ACRBP	1038.8	754.34	-0.46109	40712	22015	1.9171	0.027615	0.97239	0.055229	0.16724	FALSE	160	170	823	620
ACRC_56601_AAACTATTGTGGAGCCACCG	ACRC	499.84	440.19	-0.18295	1780.9	8238.5	0.6572	0.25553	0.74447	0.51105	0.69555	FALSE	133	131	340	330
ACRC_56602_CAAACCACCAAGTGATCCTG	ACRC	265.24	456.42	0.78078	18607	3527.7	3.2188	0.99936	0.00064362	0.0012872	0.0099485	TRUE	108	78	143	400
ACRC_56603_GCATCCTTAATGTCCAGTCA	ACRC	547.4	281.68	-0.95603	36257	9306.6	2.7543	0.0029407	0.99706	0.0058814	0.033141	FALSE	103	104	415	191
ACRC_56604_TTATTGGAAATAAACAGCGA	ACRC	68.689	71.614	0.059334	4.2808	585.94	0.12087	0.54707	0.45293	0.90585	0.95469	TRUE	35	9	30	66
ACRV1_173_CCTGACTCAAGCTCACTCAA	ACRV1	258.9	102.17	-1.333	12922	3415.5	2.6818	0.0036561	0.99634	0.0073123	0.039042	FALSE	29	43	216	64
ACRV1_174_GCTGAAGGTGAGCATACTGT	ACRV1	573.81	523.26	-0.1328	1278.4	9914.3	0.50769	0.30583	0.69417	0.61167	0.77007	FALSE	120	133	423	415
ACRV1_175_TGGTTCAAGCAAGCACACTG	ACRV1	420.59	250.17	-0.74714	14762	6536.5	2.1078	0.017524	0.98248	0.035048	0.12254	FALSE	93	84	305	178
ACRV1_176_TTCAGGTGAGCACGCTTCAG	ACRV1	157.46	78.298	-0.99871	3226.4	1760	1.8868	0.029506	0.97049	0.059013	0.17491	FALSE	87	57	62	25
ACSBG1_32071_GAAGGTGAATAATGCCCAGT	ACSBG1	729.16	478.38	-0.60702	31790	13677	2.1443	0.016006	0.98399	0.032011	0.11509	FALSE	189	173	501	328
ACSBG1_32072_GGAGCCCACATCACACATGG	ACSBG1	351.9	439.24	0.31903	3825.7	5148.1	1.2173	0.88825	0.11175	0.22351	0.41966	TRUE	120	87	213	373
ACSBG1_32073_TCAAAAGAACTTCTATGGAG	ACSBG1	139.49	214.84	0.61951	2871.8	1498.1	1.9468	0.97422	0.025781	0.051561	0.15971	TRUE	68	49	64	176
ACSBG1_32074_TGTGCATCGGATGTTCTACG	ACSBG1	179.65	343.75	0.93237	13813	2097.7	3.583	0.99983	0.00016987	0.00033974	0.0032639	TRUE	59	67	111	293
ACSBG2_51795_AAATTCAGGGATGGTCATCG	ACSBG2	522.03	408.68	-0.35241	6448.5	8732.8	1.213	0.11257	0.88743	0.22513	0.42158	FALSE	134	144	360	284
ACSBG2_51796_ACACGAGAGTCTTAGCCATG	ACSBG2	603.4	479.34	-0.33146	7721.3	10607	1.2046	0.11417	0.88583	0.22834	0.42548	FALSE	164	175	407	327
ACSBG2_51797_GGGACCACAGGCATACCCAA	ACSBG2	374.09	283.59	-0.39833	4114.3	5587.3	1.2107	0.11301	0.88699	0.22602	0.42264	FALSE	95	74	259	223
ACSBG2_51798_TCCATGAAATCATCCCACTG	ACSBG2	712.25	496.53	-0.51963	23456	13253	1.8739	0.030474	0.96953	0.060948	0.17881	FALSE	84	81	590	439
ACSF2_50947_ACGTAGCTGAGGCCTCCGAT	ACSF2	1442.5	1025.5	-0.49177	87549	34258	2.2526	0.012141	0.98786	0.024282	0.09443	FALSE	206	227	1159	847
ACSF2_50948_ATGGCTCGGATCAACTCTGG	ACSF2	110.96	194.79	0.80635	3582.5	1105.5	2.5214	0.99415	0.0058471	0.011694	0.0556	TRUE	36	34	69	170
ACSF2_50949_CGTGGGGGTACCATACAGGA	ACSF2	209.24	147.05	-0.50594	1948.6	2570.4	1.2266	0.10997	0.89003	0.21994	0.41554	FALSE	55	34	143	120
ACSF2_50950_GTCTTCATGGAGGACGACCA	ACSF2	423.76	279.77	-0.59723	10476	6602.5	1.772	0.038201	0.9618	0.076402	0.20786	FALSE	78	107	323	186
ACSF3_64513_CCATGATCATCTACACCAGT	ACSF3	393.11	240.62	-0.70583	11799	5970.9	1.9734	0.024226	0.97577	0.048453	0.15303	FALSE	85	57	287	195
ACSF3_64514_GCAGCGCGTTGACCACACCA	ACSF3	608.69	411.54	-0.56352	19617	10731	1.9031	0.028517	0.97148	0.057033	0.17101	FALSE	91	137	485	294
ACSF3_64515_TAACGATGCCTCCTACGTCG	ACSF3	898.24	636.89	-0.49539	34402	18104	1.9424	0.026047	0.97395	0.052093	0.16082	FALSE	266	181	584	486
ACSF3_64516_TCTTAAGTTCTGAAACGCCG	ACSF3	150.06	134.64	-0.15537	119.02	1650.8	0.37959	0.35205	0.64795	0.70411	0.83346	FALSE	72	53	70	88
ACSL1_6041_ATCACGTACATAGTCAACAA	ACSL1	163.8	107.9	-0.59769	1579.1	1854.9	1.2978	0.097105	0.90289	0.19421	0.38438	FALSE	41	46	114	67
ACSL1_6042_CAAGAGCCATCGCTTCAGCG	ACSL1	258.9	275.95	0.091674	145.41	3415.5	0.29176	0.61476	0.38524	0.77047	0.87572	TRUE	94	71	151	218
ACSL1_6043_GATGCCAATGAACTGATCTG	ACSL1	508.3	420.14	-0.27421	3894.7	8425.9	0.9604	0.16843	0.83157	0.33685	0.54118	FALSE	116	192	365	248
ACSL1_6044_GTTTCCGAGAGCCTAAACAA	ACSL1	228.26	263.54	0.20652	623.27	2886.8	0.6567	0.74431	0.25569	0.51138	0.69563	TRUE	74	87	142	189
ACSL3_6045_ATGATTACTGCAATATCTGA	ACSL3	38.043	48.698	0.34812	56.978	269.2	0.6494	0.7393	0.2607	0.5214	0.70355	TRUE	27	34	9	17
ACSL3_6046_GAAAGTTCGAAGCTTGCTAG	ACSL3	268.41	465.97	0.79351	19881	3584.1	3.2999	0.99952	0.00048358	0.00096716	0.0078815	TRUE	115	132	139	356
ACSL3_6047_GTGGTGAAGAGTAACCAATG	ACSL3	208.18	139.41	-0.5751	2388.2	2553.1	1.361	0.086737	0.91326	0.17347	0.35708	FALSE	37	52	160	94
ACSL3_6048_TATCTAAAGTATCACATCCA	ACSL3	200.78	281.68	0.48639	3295.8	2432.9	1.6402	0.94952	0.050483	0.10097	0.25039	TRUE	69	75	121	220
ACSL4_6049_AAGCCCACTTCAGACAAACC	ACSL4	668.92	532.81	-0.32766	9292.8	12181	1.2332	0.10874	0.89126	0.21749	0.41269	FALSE	137	117	496	441
ACSL4_6050_ACCTGGTCAGAGAGTGTAAG	ACSL4	1083.2	749.56	-0.53054	56114	23290	2.1859	0.01441	0.98559	0.02882	0.10677	FALSE	240	265	785	520
ACSL4_6051_GCATCATCACTCCCTTAGGT	ACSL4	346.61	303.65	-0.19035	924.13	5044.9	0.60495	0.27261	0.72739	0.54521	0.72149	FALSE	127	107	201	211
ACSL4_6052_GTGTGTCTGAGGAGATAGCG	ACSL4	507.24	501.3	-0.016954	17.629	8402.4	0.064777	0.47418	0.52582	0.94835	0.97551	FALSE	137	174	343	351
ACSL5_39335_CAGAGTTGGATTCTTCCAAG	ACSL5	321.25	503.21	0.64584	16761	4557.3	2.6954	0.99648	0.0035152	0.0070304	0.037905	TRUE	111	86	193	441
ACSL5_39336_CTTATCCCTATATGATGCTG	ACSL5	281.09	141.32	-0.98705	10051	3812.2	2.2638	0.011789	0.98821	0.023578	0.092391	FALSE	109	68	157	80
ACSL5_39337_CTTGTTGACAATATGTACGA	ACSL5	789.39	512.76	-0.62147	38704	15217	2.2425	0.012464	0.98754	0.024928	0.096233	FALSE	86	99	661	438
ACSL5_39338_TCTGATAGAGCAGAGTACCT	ACSL5	566.42	523.26	-0.11412	931.49	9743.2	0.43719	0.33099	0.66901	0.66197	0.80568	FALSE	148	166	388	382
ACSL6_32395_CTGAGATGCTAAGCCCACGG	ACSL6	508.3	398.18	-0.35148	6085.7	8425.9	1.1997	0.11514	0.88486	0.23027	0.42778	FALSE	146	129	335	288
ACSL6_32396_GATGCTCACCCATGGGAACG	ACSL6	1126.5	663.63	-0.7625	108970	24553	2.9539	0.0015688	0.99843	0.0031376	0.020306	FALSE	171	147	895	548
ACSL6_32397_GTCTCCACAGTGGATCATTG	ACSL6	639.33	726.65	0.18442	3815.9	11463	0.81553	0.79262	0.20738	0.41477	0.61293	TRUE	188	180	417	581
ACSL6_32398_TCTGTCGTCTATTGCCACGG	ACSL6	323.36	305.56	-0.081471	158.63	4597.4	0.26267	0.3964	0.6036	0.79281	0.88991	FALSE	151	70	155	250
ACSM1_57717_CAAGGTCTTTGACTTAACAC	ACSM1	57.064	69.705	0.28415	80.088	458.8	0.59013	0.72137	0.27863	0.55725	0.73085	TRUE	14	17	40	56
ACSM1_57718_CCCCCCAAAAGTGGTTAATG	ACSM1	143.72	238.71	0.72808	4584	1558.7	2.4062	0.99194	0.0080616	0.016123	0.070344	TRUE	41	50	95	200
ACSM1_57719_CGCTGTCCATGGTTCTACCA	ACSM1	170.14	132.73	-0.35587	702.48	1951.1	0.84695	0.19847	0.80153	0.39693	0.59752	FALSE	47	68	114	71
ACSM1_57720_GCACTGCTATACTGGCGGGG	ACSM1	153.23	203.39	0.40622	1264.1	1697.4	1.2174	0.88826	0.11174	0.22347	0.41964	TRUE	67	77	78	136
ACSM2A_58665_ACAGGCTCCCGAGAGGACGT	ACSM2A	361.41	242.53	-0.57349	7135.2	5335.2	1.6275	0.051819	0.94818	0.10364	0.25488	FALSE	80	98	262	156
ACSM2A_58666_GTGCATGCTCCTAATGCCCA	ACSM2A	257.85	262.59	0.026179	11.233	3396.9	0.081325	0.53241	0.46759	0.93519	0.96946	TRUE	117	91	127	184
ACSM2A_58667_TGACGCAGTTCTGTAGATGG	ACSM2A	203.95	321.79	0.6553	7032	2484.2	2.3642	0.99096	0.0090351	0.01807	0.07641	TRUE	83	91	110	246
ACSM2A_58668_TGTCTGAGAAAAGCTGTGAT	ACSM2A	667.86	308.42	-1.1121	66951	12155	3.2602	0.0005566	0.99944	0.0011132	0.0088336	FALSE	83	83	549	240
ACSM2B_69921_ATGTGGACCATATCAGACAC	ACSM2B	431.15	257.81	-0.73964	15269	6757.4	2.1087	0.017486	0.98251	0.034972	0.12235	FALSE	60	63	348	207
ACSM2B_69922_GAAGGGACTCCCCTCCAGCG	ACSM2B	153.23	199.57	0.37901	1078.2	1697.4	1.1247	0.86963	0.13037	0.26074	0.46254	TRUE	56	40	89	169
ACSM2B_69923_TGTCTGAGAAAAGCTGCGAT	ACSM2B	493.5	222.48	-1.1458	38144	8098.6	3.0116	0.0012995	0.9987	0.0025989	0.01745	FALSE	85	66	382	167
ACSM2B_69924_TTACCTTTAGAATAACCAGT	ACSM2B	96.164	32.465	-1.5378	2170.7	914.43	2.1065	0.016858	0.98314	0.033715	0.11927	FALSE	23	28	68	6
ACSM3_16797_ATTTCTGTTGATCCACCAGA	ACSM3	299.06	218.66	-0.44996	3251.5	4141.3	1.2493	0.10577	0.89423	0.21155	0.40597	FALSE	95	46	188	183
ACSM3_16798_GAAGCCTGTTCCCTACAAAG	ACSM3	281.09	508.94	0.85415	26520	3812.2	3.6902	0.99989	0.00011202	0.00022404	0.0022835	TRUE	101	149	165	384
ACSM3_16799_TGAAACAGGACTTCAAACTG	ACSM3	810.53	580.55	-0.48072	26626	15767	1.8315	0.033517	0.96648	0.067033	0.19039	FALSE	94	158	673	450
ACSM3_16800_TGCAACAGCGTCTACTGCTG	ACSM3	814.75	506.08	-0.68593	48309	15878	2.4497	0.0071493	0.99285	0.014299	0.064419	FALSE	75	99	696	431
ACSM4_69317_AGAGGGTGAACCCAATGCCG	ACSM4	472.37	402	-0.23219	2480	7637	0.80525	0.21034	0.78966	0.42068	0.61806	FALSE	94	73	353	348
ACSM4_69318_CACGAGCATCCGGTACACAG	ACSM4	59.178	127.95	1.0995	2450.4	481.33	3.1347	0.99914	0.00086312	0.0017262	0.012583	TRUE	28	53	28	81
ACSM4_69319_CATTCGATGCACAAAAACAC	ACSM4	72.916	152.78	1.0569	3295.4	634.03	3.1716	0.99924	0.00075934	0.0015187	0.011342	TRUE	33	69	36	91
ACSM4_69320_TACAATGGACTCCACCGCTG	ACSM4	542.11	548.09	0.015792	17.866	9186.3	0.062368	0.52487	0.47513	0.95027	0.97635	TRUE	150	141	363	433
ACSM5_41239_ATAACTTTGGCATCAACTCG	ACSM5	243.05	525.17	1.1083	41236	3139.2	5.0353	1	2.3852e-07	4.7704e-07	8.6679e-06	TRUE	112	139	118	411
ACSM5_41240_CTTTACCAGCGGAACCACCG	ACSM5	69.745	63.021	-0.1441	22.625	597.87	0.27502	0.39033	0.60967	0.78066	0.88202	FALSE	13	21	53	45
ACSM5_41241_GTGGAAACACCAGACTGGTG	ACSM5	415.3	314.15	-0.4016	5140.8	6426.7	1.2618	0.10351	0.89649	0.20702	0.40042	FALSE	83	71	310	258
ACSM5_41242_TGGTCAGTGTGGCTTGCATG	ACSM5	550.57	368.58	-0.57766	16726	9379	1.8792	0.03011	0.96989	0.06022	0.17732	FALSE	120	123	401	263
ACSM6_61121_CAGGGATAAAGATCCACCAA	ACSM6	168.02	270.23	0.68227	5295.6	1918.9	2.3331	0.99018	0.0098223	0.019645	0.080894	TRUE	46	46	113	237
ACSM6_61122_CCTGCCTAGGACGGACTCAG	ACSM6	340.27	488.89	0.52153	11133	4921.8	2.1184	0.98293	0.017072	0.034144	0.12029	TRUE	112	84	210	428
ACSM6_61123_TGTCAGATAAGAGCTATGAT	ACSM6	198.67	171.87	-0.20788	359.43	2398.8	0.54707	0.29215	0.70785	0.5843	0.74988	FALSE	80	88	108	92
ACSM6_61124_TTTGCAGATAGAGTGGTGAT	ACSM6	454.4	367.62	-0.305	3776	7250.2	1.0192	0.15406	0.84594	0.30812	0.51246	FALSE	128	107	302	278
ACSS1_53763_ACCAGCATTGGGATAAACTG	ACSS1	268.41	199.57	-0.42575	2383	3584.1	1.15	0.12507	0.87493	0.25013	0.45037	FALSE	79	72	175	137
ACSS1_53764_CAGACAACAAGGTCCACATG	ACSS1	206.07	111.72	-0.87736	4553.2	2518.6	1.88	0.030037	0.96996	0.060074	0.17703	FALSE	74	37	121	80
ACSS1_53765_GATCAAAGCAACGCTCTCGG	ACSS1	380.43	626.39	0.71794	30713	5714.4	3.2537	0.99943	0.00056958	0.0011392	0.0090009	TRUE	102	127	258	529
ACSS1_53766_GCTGAAATACGGTGATGCCT	ACSS1	103.56	138.45	0.41545	611.96	1008.8	1.0986	0.86395	0.13605	0.2721	0.47489	TRUE	37	46	61	99
ACSS2_43695_CAGGAAGGGGAGTCAACATG	ACSS2	212.41	105.03	-1.0091	5939.2	2622.5	2.0967	0.017994	0.98201	0.035988	0.12472	FALSE	67	21	134	89
ACSS2_43696_CAGTGGCCCATAGGTGACGT	ACSS2	536.83	528.04	-0.023775	38.638	9066.4	0.092322	0.46322	0.53678	0.92644	0.96508	FALSE	100	104	408	449
ACSS2_43697_GCATTGTGGTCAAGCACCTG	ACSS2	86.653	127.95	0.55694	860.79	796.63	1.4632	0.92822	0.071785	0.14357	0.3166	TRUE	36	20	46	114
ACSS2_43698_GGAACCAAGGGATTGACTTG	ACSS2	453.34	622.57	0.45676	14408	7227.6	1.9905	0.97673	0.023268	0.046535	0.14881	TRUE	175	163	254	489
ACSS3_49387_ACATGGTATACATCGCCTGT	ACSS3	708.02	473.61	-0.57909	27750	13147	2.0444	0.020458	0.97954	0.040916	0.1363	FALSE	180	141	490	355
ACSS3_49388_CCGGGACCACTAAAGCCCTG	ACSS3	419.53	258.77	-0.69499	13109	6514.5	1.9918	0.023197	0.9768	0.046394	0.14849	FALSE	132	105	265	166
ACSS3_49389_CTTGTACCAGCTGATCTGCT	ACSS3	481.88	257.81	-0.89975	25706	7843.9	2.5299	0.0057042	0.9943	0.011408	0.054566	FALSE	124	99	332	171
ACSS3_49390_GGTGTGATTAGGCCCACTGG	ACSS3	91.937	78.298	-0.22896	93.155	861.57	0.46465	0.3205	0.6795	0.641	0.79053	FALSE	51	40	36	42
ACTA1_177_CTTCTACAACGAGCTTCGCG	ACTA1	205.01	182.38	-0.16789	256.3	2501.4	0.45249	0.32544	0.67456	0.65089	0.79772	FALSE	26	34	168	157
ACTA1_178_GGGTCAGAAAGATTCCTACG	ACTA1	132.09	95.486	-0.46405	674.44	1393.4	0.98068	0.16321	0.83679	0.32641	0.53132	FALSE	49	51	76	49
ACTA1_179_GGTGAAAGCCGGCTTCGCCG	ACTA1	62.348	16.233	-1.8782	1174.4	515.63	2.0309	0.018171	0.98183	0.036341	0.1256	FALSE	28	7	31	10
ACTA1_180_TCAGGTAGTCGGTGAGATCG	ACTA1	815.81	552.86	-0.56047	34895	15906	2.0849	0.018538	0.98146	0.037076	0.12731	FALSE	217	156	555	423
ACTA2_181_CATGTATGTGGCTATCCAGG	ACTA2	122.58	169.01	0.46014	1084.7	1261.8	1.307	0.90437	0.095628	0.19126	0.38051	TRUE	41	28	75	149
ACTA2_182_GAAGCTCATTGTAGAAAGAG	ACTA2	259.96	278.82	0.10067	177.89	3434.1	0.32182	0.6262	0.3738	0.74759	0.8617	TRUE	83	58	163	234
ACTA2_183_GACGTCCCAGACATCAGGTG	ACTA2	143.72	161.37	0.16605	155.95	1558.7	0.44714	0.67257	0.32743	0.65486	0.80075	TRUE	45	35	91	134
ACTA2_184_GGCCTCACCAGTAGTAACGA	ACTA2	190.21	120.31	-0.65647	2474.9	2263.7	1.4692	0.070859	0.92914	0.14172	0.31388	FALSE	56	47	124	79
ACTB_185_AAGAGCTACGAGCTGCCTGA	ACTB	88.767	352.34	1.9768	38552	822.45	9.1908	1	1.9521e-20	3.9042e-20	2.1322e-18	TRUE	56	90	28	279
ACTB_186_CGTACAGGGATAGCACAGCC	ACTB	125.75	269.27	1.0924	10663	1305.3	3.9724	0.99996	3.5586e-05	7.1172e-05	0.00083725	TRUE	47	26	72	256
ACTB_187_GGATTCCTATGTGGGCGACG	ACTB	66.575	134.64	1.0052	2386.3	562.25	2.8703	0.99794	0.0020555	0.0041111	0.025143	TRUE	24	37	39	104
ACTB_188_TCACCTGGGTCATCTTCTCG	ACTB	313.85	447.83	0.51148	9045.1	4417.5	2.0158	0.97809	0.021913	0.043826	0.14274	TRUE	135	88	162	381
ACTBL2_69701_GAGGACGCCCTATCATGGAG	ACTBL2	103.56	64.93	-0.66533	756.22	1008.8	1.2163	0.11145	0.88855	0.22289	0.41894	FALSE	24	19	74	49
ACTBL2_69702_GGAGCTATGAACTTCCTGAT	ACTBL2	257.85	263.54	0.031396	16.215	3396.9	0.097708	0.53892	0.46108	0.92217	0.96304	TRUE	92	97	152	179
ACTBL2_69703_GGAGCTCATTGTAGAATGTG	ACTBL2	124.7	113.63	-0.13298	61.283	1290.7	0.30807	0.37885	0.62115	0.75771	0.86812	FALSE	23	32	95	87
ACTBL2_69704_TGTCCCTCTATGCCTCAGGA	ACTBL2	299.06	289.32	-0.047593	47.41	4141.3	0.15131	0.43986	0.56014	0.87973	0.93982	FALSE	77	62	206	241
ACTC1_189_CGATGGACGGGAAGACAGCG	ACTC1	565.36	286.46	-0.97837	39995	9718.8	2.8291	0.002334	0.99767	0.0046681	0.027761	FALSE	110	145	425	155
ACTC1_190_CTGGGCTTCATCACCTACGT	ACTC1	201.84	203.39	0.010956	1.1954	2449.9	0.031239	0.51245	0.48755	0.9751	0.98791	TRUE	35	43	156	170
ACTC1_191_GGTACGGCCAGAAGCATACA	ACTC1	348.73	391.49	0.16644	915.21	5086.1	0.59965	0.72563	0.27437	0.54874	0.72452	TRUE	195	116	135	294
ACTC1_192_TCTTCATGAGGTAGTCAGTG	ACTC1	398.39	288.37	-0.46491	6092.2	6078.6	1.4112	0.07909	0.92091	0.15818	0.33674	FALSE	93	93	284	209
ACTG1_193_AGCTGTAGCCTCGCTCAGTG	ACTG1	380.43	327.52	-0.21545	1401.8	5714.4	0.69996	0.24198	0.75802	0.48395	0.67376	FALSE	126	125	234	218
ACTG1_194_ATGGAAGGAAACACGGCTCG	ACTG1	338.16	221.53	-0.60798	6876.9	4880.9	1.6694	0.047517	0.95248	0.095033	0.2404	FALSE	80	45	240	187
ACTG1_195_CAACAGAGAGAAGATGACTC	ACTG1	124.7	123.18	-0.017545	1.1543	1290.7	0.042291	0.483	0.517	0.966	0.98368	FALSE	35	47	83	82
ACTG1_196_CTTCTACAACGAGCTGCGCG	ACTG1	168.02	70.66	-1.238	4954.9	1918.9	2.2226	0.013059	0.98694	0.026117	0.099476	FALSE	40	17	119	57
ACTG2_197_AGAGCTATGAGCTGCCAGAT	ACTG2	771.43	490.8	-0.65133	39875	14753	2.3104	0.010433	0.98957	0.020866	0.084454	FALSE	240	199	490	315
ACTG2_198_CTGGATACCTGTGGTCACAA	ACTG2	683.72	550	-0.31346	8966.5	12544	1.1939	0.11626	0.88374	0.23253	0.43061	FALSE	247	187	400	389
ACTG2_199_TGAATCCAGGACGATGCCTG	ACTG2	1403.4	1013.1	-0.46971	76653	33013	2.1479	0.015862	0.98414	0.031724	0.11436	FALSE	276	302	1052	759
ACTG2_200_TGATGATGCCGTGTTCAATG	ACTG2	889.78	550.95	-0.69052	58218	17875	2.5343	0.0056336	0.99437	0.011267	0.054078	FALSE	174	166	668	411
ACTL10_64161_AGAAGATGCCCAAAACGCTG	ACTL10	81.37	105.99	0.37728	304.38	732.99	0.90936	0.81818	0.18182	0.36364	0.56674	TRUE	49	30	28	81
ACTL10_64162_AGATGTGTGATGGCCTTGCG	ACTL10	737.61	586.28	-0.33076	11487	13891	1.284	0.099578	0.90042	0.19916	0.39054	FALSE	197	186	501	428
ACTL10_64163_CACGCCACGCCCATCTACGC	ACTL10	273.7	404.86	0.56314	8683.7	3678.7	2.1625	0.98471	0.015288	0.030577	0.11139	TRUE	92	104	167	320
ACTL10_64164_GGCCACCTTCCGACTGAACG	ACTL10	647.79	312.24	-1.0505	58128	11667	3.1065	0.00094655	0.99905	0.0018931	0.013532	FALSE	126	105	487	222
ACTL6A_205_ACCACCATACCAATAGCTGT	ACTL6A	516.75	445.92	-0.21224	2511.9	8614.4	0.76314	0.22269	0.77731	0.44538	0.6408	FALSE	139	176	350	291
ACTL6A_206_ACTGCAATTCCAGTCCACGA	ACTL6A	19.021	243.49	3.6102	33158	108.88	21.512	1	6.206e-103	1.2412e-102	3.1723e-100	TRUE	9	18	9	237
ACTL6A_207_AGAAGTTGCCTCAGGTTACG	ACTL6A	1311.4	1179.3	-0.15314	8741	30132	0.76143	0.2232	0.7768	0.4464	0.64154	FALSE	452	385	789	850
ACTL6A_208_TGTTCCGAGGGAGAATATGG	ACTL6A	83.483	470.75	2.4813	87416	758.29	14.063	1	3.1932e-45	6.3863e-45	7.3377e-43	TRUE	44	80	35	413
ACTL6B_38715_AGTGGAACACACGGGCCAAG	ACTL6B	137.38	142.27	0.050171	11.99	1468	0.12781	0.55077	0.44923	0.89845	0.95043	TRUE	54	42	76	107
ACTL6B_38716_ATGCCAGCTTTGCAAACGGG	ACTL6B	907.75	901.39	-0.010131	20.219	18362	0.046929	0.48129	0.51871	0.96257	0.98191	FALSE	290	276	569	668
ACTL6B_38717_CACTCACTGTTCATCGTAGG	ACTL6B	332.88	369.53	0.15028	672.25	4779.2	0.53022	0.70202	0.29798	0.59596	0.75838	TRUE	48	52	267	335
ACTL6B_38718_TTGGCTGCGATCATGTAAGG	ACTL6B	315.97	272.13	-0.21472	961.99	4457.3	0.65654	0.25574	0.74426	0.51147	0.6957	FALSE	102	114	197	171
ACTL7A_29415_ATCGCAAGGAGACATTCGTG	ACTL7A	1360	888.02	-0.61442	112650	31647	2.6533	0.003985	0.99602	0.00797	0.041686	FALSE	250	257	1037	673
ACTL7A_29416_GGGCCATGGCGTGTCCTACG	ACTL7A	907.75	909.98	0.0035432	2.4968	18362	0.016491	0.50658	0.49342	0.98684	0.99363	TRUE	298	236	561	717
ACTL7A_29417_GTGGCTCTGAACTCGTATGG	ACTL7A	387.83	737.15	0.92479	62560	5863.7	4.5619	1	2.5348e-06	5.0696e-06	7.6708e-05	TRUE	143	178	224	594
ACTL7A_29418_GTTGTTGAGATCTTGTGGGT	ACTL7A	351.9	102.17	-1.7742	33979	5148.1	3.4805	0.00024977	0.99975	0.00049953	0.0045298	FALSE	65	45	268	62
ACTL7B_29411_ACTCCTACGGCAAGACCTCG	ACTL7B	267.36	473.61	0.82259	21699	3565.3	3.4542	0.99972	0.00027592	0.00055183	0.0049267	TRUE	98	101	155	395
ACTL7B_29412_AGCCGCGCCGACTACGCTGG	ACTL7B	190.21	248.26	0.38248	1692.3	2263.7	1.2201	0.88878	0.11122	0.22245	0.41844	TRUE	33	49	147	211
ACTL7B_29413_CAAGAAGAAGTGCTGCTATG	ACTL7B	894.01	911.89	0.028541	159.89	17989	0.13333	0.55303	0.44697	0.89394	0.94777	TRUE	237	285	609	670
ACTL7B_29414_CGTGGGCAAACGCTGCCCCG	ACTL7B	555.85	497.48	-0.15975	1704.7	9500	0.59884	0.27464	0.72536	0.54928	0.72494	FALSE	113	109	413	412
ACTL8_51715_CTGGTGGAAAGGCTGCACGC	ACTL8	454.4	606.34	0.41535	11602	7250.2	1.7844	0.96282	0.037183	0.074366	0.20425	TRUE	133	129	297	506
ACTL8_51716_GAGACTCTTGAGGAGATAGG	ACTL8	612.91	571.01	-0.10201	878.41	10832	0.40267	0.3436	0.6564	0.68719	0.8226	FALSE	196	127	384	471
ACTL8_51717_TGTCTCCGTGATGATCACAG	ACTL8	451.23	466.93	0.04922	123.17	7182.5	0.18519	0.57346	0.42654	0.85308	0.92576	TRUE	95	142	332	347
ACTL8_51718_TTTAGCTACCCCATCGAGCG	ACTL8	971.15	1237.5	0.34934	35600	20108	1.8783	0.96983	0.030171	0.060342	0.17761	TRUE	164	236	755	1060
ACTL9_67813_CAGCCCGCTGACACGACCGT	ACTL9	356.12	549.04	0.62312	18825	5231	2.6674	0.99618	0.0038223	0.0076446	0.04034	TRUE	102	57	235	518
ACTL9_67814_CCCAAACCCCAGTCCCAACG	ACTL9	185.99	337.07	0.85436	11661	2196.9	3.2232	0.99937	0.00063376	0.0012675	0.0098266	TRUE	46	45	130	308
ACTL9_67815_GCTGCCACCAAAGACCGGCG	ACTL9	34.873	59.201	0.74691	301.04	240.17	1.5698	0.94105	0.058946	0.11789	0.2773	TRUE	14	17	19	45
ACTL9_67816_TAAGCACCACTATTGCTACG	ACTL9	750.29	442.1	-0.76174	48311	14213	2.5851	0.0048671	0.99513	0.0097341	0.048518	FALSE	90	69	620	394
ACTN1_209_CAGGACATCAACAATGCCTG	ACTN1	126.81	154.69	0.28465	389.53	1319.9	0.76734	0.77851	0.22149	0.44299	0.63862	TRUE	37	29	83	133
ACTN1_210_GCAGGGCCTTGATCTCCGAG	ACTN1	995.46	749.56	-0.40883	30383	20788	1.7054	0.044056	0.95594	0.088113	0.22891	FALSE	321	276	621	509
ACTN1_211_GGATCCGCCGCACAATCCCG	ACTN1	72.916	171.87	1.2258	5114.4	634.03	3.9301	0.99996	4.2542e-05	8.5084e-05	0.00097832	TRUE	27	46	42	134
ACTN1_212_GGCCCTAACTCAGAAGCGAA	ACTN1	275.81	216.75	-0.34621	1750.2	3716.7	0.96873	0.16634	0.83366	0.33268	0.53725	FALSE	85	68	176	159
ACTN2_213_AGGACTTCCGGGATTACCGC	ACTN2	110.96	197.66	0.82731	3835.3	1105.5	2.6075	0.99544	0.0045616	0.0091232	0.046247	TRUE	30	24	75	183
ACTN2_214_CCAGGTTAATATTTCCTATG	ACTN2	125.75	128.91	0.035448	4.971	1305.3	0.087272	0.53466	0.46534	0.93069	0.96722	TRUE	70	38	49	97
ACTN2_215_CGAGTCGGCGTCGCTGACAG	ACTN2	300.12	196.7	-0.607	5406.5	4160.8	1.6032	0.054441	0.94556	0.10888	0.26333	FALSE	74	63	210	143
ACTN2_216_TGATGGTCCAGATCATACCC	ACTN2	289.55	551.91	0.92826	35296	3966.2	4.1659	0.99998	1.5504e-05	3.1008e-05	0.00039802	TRUE	96	102	178	476
ACTN3_217_CAGTGAGCTGGACTACCACG	ACTN3	1064.1	513.71	-1.0492	156400	22742	3.65	0.00013112	0.99987	0.00026224	0.002615	FALSE	137	112	870	426
ACTN3_218_CCATGGCTGGAGAACCGTGT	ACTN3	89.824	95.486	0.087252	16.035	835.44	0.1959	0.57726	0.42274	0.84548	0.92097	TRUE	32	54	53	46
ACTN3_219_GTCCAGGGCCTTGTTAACGT	ACTN3	218.75	296.96	0.43928	3076.5	2727.4	1.4977	0.93289	0.067112	0.13422	0.30306	TRUE	57	81	150	230
ACTN3_220_TGCAACTGGAGTTTGCCCGG	ACTN3	54.951	100.26	0.85583	1049.3	436.54	2.1686	0.98488	0.015122	0.030244	0.11058	TRUE	24	14	28	91
ACTN4_201_ACAGATCGAGAACATTGATG	ACTN4	232.48	201.48	-0.20558	481.4	2958.3	0.57012	0.28429	0.71571	0.56858	0.74005	FALSE	79	100	141	111
ACTN4_202_ACTCCCACAATGTCAACACC	ACTN4	380.43	624.48	0.71354	30232	5714.4	3.2284	0.99938	0.00062236	0.0012447	0.0096819	TRUE	101	118	259	536
ACTN4_203_GTTCATCGTCCATACCATCG	ACTN4	333.93	332.29	-0.0070869	1.3468	4799.5	0.023691	0.49055	0.50945	0.9811	0.99102	FALSE	72	101	244	247
ACTN4_204_TGGGCGGCTTGTGCACACGC	ACTN4	197.61	364.76	0.88093	14291	2381.8	3.4248	0.99969	0.00030759	0.00061518	0.0054038	TRUE	81	95	106	287
ACTR10_43603_AAAAAGATATGGGTAACACC	ACTR10	50.724	50.608	-0.0032489	0.0067684	392.87	0.00587	0.49501	0.50499	0.99002	0.99525	FALSE	26	32	22	21
ACTR10_43604_AATGAATTTACCCATCACTG	ACTR10	47.554	105.99	1.1398	1773.9	360.88	3.0761	0.99894	0.0010553	0.0021106	0.014761	TRUE	21	25	24	86
ACTR10_43605_AATGGATAGTCAACATTTGG	ACTR10	88.767	154.69	0.7944	2214	822.45	2.2986	0.98923	0.010774	0.021548	0.086467	TRUE	21	41	63	121
ACTR10_43606_ATTCGATAATCACAACTCGG	ACTR10	4.227	17.187	1.7989	93.304	15.791	3.2614	0.99935	0.00064725	0.0012945	0.0099878	TRUE	2	4	2	14
ACTR1A_27069_AGTCGTAGCCCTCCTTACGC	ACTR1A	16.908	16.233	-0.05546	0.22808	93.436	0.069867	0.45008	0.54992	0.90016	0.95134	FALSE	8	1	8	16
ACTR1A_27070_CGCTACAGGCAGGACCACAG	ACTR1A	12.681	7.6389	-0.66326	12.909	64.384	0.62838	0.22043	0.77957	0.44087	0.63671	FALSE	11	8	1	0
ACTR1A_27071_GAAGGTCTCGAAGAAAACTT	ACTR1A	11.624	92.621	2.8906	4021.5	57.544	10.677	1	6.9201e-27	1.384e-26	9.8693e-25	TRUE	5	1	6	96
ACTR1A_27072_TGACACGAACGTGCTTGGGT	ACTR1A	28.532	50.608	0.80529	248.57	184.7	1.6243	0.9469	0.053102	0.1062	0.25915	TRUE	14	6	13	47
ACTR1B_27065_CTTCATCGGACCAAAAGCAG	ACTR1B	28.532	62.066	1.0946	582.86	184.7	2.4675	0.99307	0.0069279	0.013856	0.062962	TRUE	21	10	6	55
ACTR1B_27066_GCATCCTGTGCTCCTCACGG	ACTR1B	131.04	138.45	0.078856	27.518	1378.6	0.19978	0.57909	0.42091	0.84183	0.91895	TRUE	37	30	87	115
ACTR1B_27067_GGTTGTCCGGACAATCAAAG	ACTR1B	138.43	50.608	-1.4339	4090.3	1483	2.2806	0.011125	0.98888	0.02225	0.088625	FALSE	17	15	114	38
ACTR1B_27068_TCCGTCCTAACAGTGTCGGG	ACTR1B	122.58	149.91	0.28824	374.41	1261.8	0.7694	0.77911	0.22089	0.44178	0.63755	TRUE	59	39	57	118
ACTR2_26993_ACTGGTGTAGTGGTAGACTC	ACTR2	97.221	398.18	2.0229	50473	927.77	9.8806	1	2.5285e-23	5.0571e-23	3.1255e-21	TRUE	56	92	36	325
ACTR2_26994_ATCCTCGCAACAGAAGTAGC	ACTR2	712.25	930.03	0.38443	23820	13253	1.8918	0.97074	0.029259	0.058518	0.17395	TRUE	230	261	444	713
ACTR2_26995_GGACGTATCATCAAAGTTGG	ACTR2	54.951	380.99	2.7713	63875	436.54	15.605	1	3.3946e-55	6.7893e-55	9.5594e-53	TRUE	28	38	24	361
ACTR2_26996_GGATGACATGAAACACCTGT	ACTR2	133.15	250.17	0.90483	7014.4	1408.3	3.1184	0.99909	0.0009094	0.0018188	0.013103	TRUE	11	28	115	234
ACTR3_26989_ACCGGTACGGTAATAGACAG	ACTR3	91.937	276.91	1.5803	18343	861.57	6.3018	1	1.4727e-10	2.9454e-10	7.9091e-09	TRUE	18	49	69	241
ACTR3_26990_ATTAAGGAGTCAGCAAAAGT	ACTR3	137.38	179.51	0.3835	891.69	1468	1.0998	0.86426	0.13574	0.27148	0.47425	TRUE	65	87	65	101
ACTR3_26991_CCCAATCTTCAACTATACCA	ACTR3	39.1	148	1.8937	6539.5	279.05	6.5193	1	3.566e-11	7.132e-11	2.015e-09	TRUE	0	5	37	150
ACTR3_26992_TTAACAAGTATGATACAGAT	ACTR3	82.426	59.201	-0.47071	271.53	745.61	0.85055	0.19649	0.80351	0.39298	0.59396	FALSE	31	37	47	25
ACTR3B_45215_AGGTAGTTGACCAAGCTCAA	ACTR3B	183.87	311.28	0.75632	8255.5	2163.7	2.7391	0.99692	0.0030808	0.0061616	0.034325	TRUE	69	125	105	201
ACTR3B_45216_TACTGTTTGATCCACTTCCG	ACTR3B	245.17	317.97	0.37378	2661.3	3175.7	1.2919	0.9018	0.098196	0.19639	0.38727	TRUE	83	60	149	273
ACTR3B_45217_TGGGTGAACGTACGTTAACG	ACTR3B	735.5	536.63	-0.45406	19896	13837	1.6906	0.045459	0.95454	0.090918	0.23349	FALSE	122	146	574	416
ACTR3B_45218_TTTGAATCATTTAACGTACC	ACTR3B	291.66	192.88	-0.59406	4930.6	4004.9	1.5609	0.059271	0.94073	0.11854	0.27837	FALSE	80	82	196	120
ACTR3C_74418_CATTTGCCCCGATATAGTCA	ACTR3C	88.767	143.23	0.68411	1504	822.45	1.8991	0.97119	0.028806	0.057613	0.17217	TRUE	34	46	50	104
ACTR3C_74419_GCTTACCACTGGGATAACAT	ACTR3C	108.85	36.285	-1.5588	2820.9	1077.6	2.2104	0.013089	0.98691	0.026177	0.099616	FALSE	53	29	50	9
ACTR3C_74420_TACTGTTTGATCCACTTCTG	ACTR3C	140.55	143.23	0.027074	3.5952	1513.2	0.068932	0.52741	0.47259	0.94519	0.97388	TRUE	35	68	98	82
ACTR3C_74421_TGGGTGAACGTACATTAACG	ACTR3C	816.87	878.47	0.10477	1898.2	15933	0.48805	0.68724	0.31276	0.62552	0.77994	TRUE	189	226	584	694
ACTR5_50339_CGGGACACGCCCAGCCAGCG	ACTR5	254.68	347.57	0.44713	4340.5	3341.2	1.607	0.94598	0.054023	0.10805	0.26213	TRUE	102	122	139	242
ACTR5_50340_TCATTTGCCGTGAATACAGT	ACTR5	171.19	188.11	0.13518	143.12	1967.3	0.38134	0.64851	0.35149	0.70299	0.83276	TRUE	29	34	133	163
ACTR5_50341_TGAGCACAGCTACATCGCTG	ACTR5	87.71	231.08	1.3874	10856	809.51	5.0389	1	2.3437e-07	4.6874e-07	8.521e-06	TRUE	36	38	47	204
ACTR5_50342_TGGGTAAAACATGCGTACAC	ACTR5	136.32	75.434	-0.84526	1893.5	1453	1.5973	0.054933	0.94507	0.10987	0.26488	FALSE	37	37	92	42
ACTR6_47795_AGATGTATGCTATGTGTCTC	ACTR6	254.68	216.75	-0.23162	720.25	3341.2	0.65607	0.25589	0.74411	0.51177	0.69578	FALSE	87	83	154	144
ACTR6_47796_ATAATTCGGAAGGATTATCT	ACTR6	136.32	125.09	-0.12313	63.129	1453	0.29471	0.384	0.616	0.768	0.87432	FALSE	33	47	96	84
ACTR6_47797_CTCCCCTTGCAGGATAAATG	ACTR6	313.85	262.59	-0.25641	1316.8	4417.5	0.77136	0.22025	0.77975	0.44049	0.63638	FALSE	94	80	203	195
ACTR6_47798_GGATGTAAAAGAGTCCAGAA	ACTR6	10.567	18.142	0.72669	29.199	50.893	1.0618	0.84511	0.15489	0.30978	0.51414	TRUE	9	10	1	9
ACTR8_56605_AGCCAACTGTCCTTGTATAG	ACTR8	83.483	252.08	1.5829	15243	758.29	6.1227	1	4.6067e-10	9.2135e-10	2.3447e-08	TRUE	28	37	51	227
ACTR8_56606_CAACGATTCCAAAAGTTGCG	ACTR8	442.78	249.22	-0.82665	19114	7002.7	2.313	0.01036	0.98964	0.020721	0.084035	FALSE	138	153	281	108
ACTR8_56607_CACGTGTATTGTAGACGTTG	ACTR8	648.84	775.35	0.25661	8017.3	11693	1.1699	0.87898	0.12102	0.24205	0.44158	TRUE	169	206	445	606
ACTR8_56608_CTTCTCCTACTAAATACTCA	ACTR8	61.291	85.937	0.48094	305.86	504.13	1.0977	0.86339	0.13661	0.27321	0.4761	TRUE	39	20	19	70
ACTRT1_60749_ACGGAGCTGATGACATGGCG	ACTRT1	187.04	95.486	-0.96268	4307.5	2213.6	1.946	0.025791	0.97421	0.051581	0.15973	FALSE	60	24	117	76
ACTRT1_60750_GGTAACAGGATGGGATGACA	ACTRT1	538.94	275	-0.96814	35799	9114.3	2.7647	0.0028488	0.99715	0.0056976	0.032317	FALSE	122	114	388	174
ACTRT1_60751_TGATTAGACAGGTAGAAACC	ACTRT1	132.09	99.305	-0.40804	540.25	1393.4	0.87836	0.18971	0.81029	0.37942	0.58141	FALSE	68	60	57	44
ACTRT1_60752_TTAATCAGAAGTACTTCGTG	ACTRT1	147.94	251.13	0.75938	5415.4	1620	2.5636	0.99482	0.00518	0.01036	0.050852	TRUE	35	32	105	231
ACTRT2_60861_CGCAGTCACCAAGCTCCACG	ACTRT2	550.57	466.93	-0.23725	3503.7	9379	0.86364	0.19389	0.80611	0.38779	0.58908	FALSE	172	162	349	327
ACTRT2_60862_CGTGCCCGCTTTCTACCTGT	ACTRT2	572.76	387.67	-0.56188	17290	9889.8	1.8611	0.031363	0.96864	0.062726	0.18216	FALSE	175	126	367	280
ACTRT2_60863_GAATTTCAGGTGCCCCACGA	ACTRT2	149	171.87	0.20475	261.93	1635.4	0.56561	0.71414	0.28586	0.57173	0.742	TRUE	35	29	106	151
ACTRT2_60864_GATCAGGCCACGCTCGAAAG	ACTRT2	436.44	455.47	0.061439	181.11	6868.6	0.22963	0.59081	0.40919	0.81838	0.90514	TRUE	152	140	261	337
ACTRT3_53719_AATGTTCGGGTAGATAAACT	ACTRT3	94.051	116.49	0.30581	252.55	887.9	0.75316	0.77414	0.22586	0.45172	0.64661	TRUE	49	53	40	69
ACTRT3_53720_CACTGAGCAACATGATACCA	ACTRT3	215.58	121.27	-0.82484	4537.8	2674.8	1.8235	0.034098	0.9659	0.068196	0.19266	FALSE	82	80	122	47
ACTRT3_53721_GGCGGGCTAGAACTCTGCGT	ACTRT3	112.02	102.17	-0.13149	48.491	1119.5	0.29426	0.38403	0.61597	0.76806	0.87433	FALSE	36	29	70	78
ACTRT3_53722_TGTGGCAATGAACTACGAAG	ACTRT3	47.554	90.712	0.91753	955.1	360.88	2.2718	0.98838	0.01162	0.023239	0.091464	TRUE	29	21	16	74
ACVR1_221_ATTACACTGTTGGAGTGTGT	ACVR1	290.61	444.96	0.61291	12047	3985.5	2.4451	0.99276	0.0072414	0.014483	0.065018	TRUE	86	87	189	379
ACVR1_222_CCATGACTTCTCATCACGGG	ACVR1	373.03	173.78	-1.0976	20556	5566.1	2.6706	0.003785	0.99622	0.0075699	0.040028	FALSE	65	42	288	140
ACVR1_223_CTGGTGTAACAGGAACATCA	ACVR1	131.04	150.87	0.20188	196.88	1378.6	0.5341	0.7033	0.2967	0.5934	0.7564	TRUE	52	59	72	99
ACVR1_224_GCCATCGTTGATGCTCAGTG	ACVR1	143.72	213.89	0.57035	2486.1	1558.7	1.7773	0.96224	0.037761	0.075522	0.20635	TRUE	55	66	81	158
ACVR1B_225_AAGAGATTATTGGCAAGGGT	ACVR1B	81.37	67.795	-0.25981	92.326	732.99	0.50139	0.30713	0.69287	0.61426	0.77187	FALSE	56	53	21	18
ACVR1B_226_ACTTGACTCAGGTCACCTCA	ACVR1B	455.46	430.64	-0.080649	308	7272.8	0.291	0.38553	0.61447	0.77105	0.87604	FALSE	129	148	302	303
ACVR1B_227_CCGGTTCAGATAATCAAACA	ACVR1B	82.426	101.22	0.29303	176.97	745.61	0.68808	0.75399	0.24601	0.49202	0.68044	TRUE	42	58	36	48
ACVR1B_228_CTACACGTGTGAGACAGATG	ACVR1B	49.667	54.427	0.12954	11.334	382.13	0.24349	0.59394	0.40606	0.81212	0.90172	TRUE	21	22	26	35
ACVR1C_59805_ATTGTCCTTTGAACCAACAG	ACVR1C	200.78	275	0.45187	2771.1	2432.9	1.5047	0.9338	0.066203	0.13241	0.30042	TRUE	51	58	139	230
ACVR1C_59806_CCAAGATCTTTCATCTCTGG	ACVR1C	318.08	336.11	0.079298	162.56	4497.2	0.26885	0.60598	0.39402	0.78805	0.88702	TRUE	45	71	256	281
ACVR1C_59807_CTGGCGCTCTCAATTGCTAG	ACVR1C	247.28	296.96	0.26316	1236.7	3212.3	0.87659	0.80964	0.19036	0.38071	0.58251	TRUE	124	139	110	172
ACVR1C_59808_TGTAGGAGCACTGTCGACCC	ACVR1C	199.73	107.9	-0.88223	4314.2	2415.8	1.8683	0.03084	0.96916	0.06168	0.18022	FALSE	43	40	146	73
ACVR2A_229_AGTGGTTTCAAACCTAGTAA	ACVR2A	183.87	248.26	0.43113	2084.6	2163.7	1.3842	0.91686	0.083145	0.16629	0.34783	TRUE	83	118	91	142
ACVR2A_230_ATTGCAGAAACCATGGCTAG	ACVR2A	269.47	395.31	0.55116	7990.2	3603	2.0965	0.98198	0.01802	0.03604	0.12487	TRUE	96	56	159	358
ACVR2A_231_CCAAAGATCCACATCAACAC	ACVR2A	33.816	71.614	1.0605	738.83	230.68	2.4887	0.9935	0.0064954	0.012991	0.06005	TRUE	16	9	16	66
ACVR2A_232_CCAGTTGCTTAACGAATATG	ACVR2A	471.31	312.24	-0.59247	12785	7614.1	1.823	0.034154	0.96585	0.068307	0.19288	FALSE	123	89	323	238
ACVR2B_233_ACAAGCCGTCTATTGCCCAC	ACVR2B	237.77	368.58	0.63026	8657.2	3048.4	2.3692	0.99109	0.0089141	0.017828	0.075695	TRUE	72	55	153	331
ACVR2B_234_ATGACTTCAACTGCTACGAT	ACVR2B	173.31	160.42	-0.11084	83.11	1999.7	0.28826	0.38654	0.61346	0.77308	0.87734	FALSE	69	48	95	120
ACVR2B_235_ATGTCCACATGACCGTAGGG	ACVR2B	195.5	311.28	0.66834	6792.9	2347.9	2.3896	0.99157	0.0084347	0.016869	0.072739	TRUE	39	54	146	272
ACVR2B_236_CTGGAGCGCACCAACCAGAG	ACVR2B	129.98	153.73	0.24043	282.58	1363.9	0.64316	0.73988	0.26012	0.52023	0.70272	TRUE	35	40	88	121
ACVRL1_237_AGGCACCCCCAGGAACATCG	ACVRL1	117.3	43.924	-1.3969	2847.6	1190.1	2.127	0.01638	0.98362	0.032759	0.11686	FALSE	9	15	102	31
ACVRL1_238_CCAGGACTGTTCATCCCTCG	ACVRL1	345.56	346.61	0.0043953	0.55907	5024.3	0.014918	0.50595	0.49405	0.9881	0.9943	TRUE	79	93	248	270
ACVRL1_239_CTGCGTGCTCGAGTTGCGGG	ACVRL1	402.62	266.41	-0.59397	9375.4	6165.2	1.7348	0.041387	0.95861	0.082774	0.21953	FALSE	101	78	280	201
ACVRL1_240_TGGACAGTGACTGCACCACA	ACVRL1	236.71	285.5	0.26934	1192.9	3030.3	0.88634	0.81228	0.18772	0.37544	0.57768	TRUE	98	37	126	262
ACY1_241_AGGCACAAAGGTCATGTGGA	ACY1	385.71	348.52	-0.14587	691.97	5820.9	0.48744	0.31297	0.68703	0.62595	0.78034	FALSE	111	109	254	256
ACY1_242_CCATGCCTCACGCTTCATGG	ACY1	352.95	342.79	-0.042014	51.608	5168.8	0.14131	0.44381	0.55619	0.88763	0.94431	FALSE	36	43	298	316
ACY1_243_GCTGGACAGTGCGGATACGC	ACY1	368.81	265.45	-0.47289	5376.9	5481.9	1.3959	0.081367	0.91863	0.16273	0.34327	FALSE	89	100	260	178
ACY1_244_TAGCTTAGTCAGGTTCACGG	ACY1	220.86	325.61	0.5579	5537.2	2762.6	1.9929	0.97686	0.023138	0.046276	0.14816	TRUE	96	74	113	267
ACY3_55965_CACCTCATATGGGTCGTCCG	ACY3	674.21	603.47	-0.15965	2503.6	12311	0.63751	0.2619	0.7381	0.52379	0.70525	FALSE	162	183	476	449
ACY3_55966_CTTCCTGTACCAGCGGTCTG	ACY3	234.6	295.05	0.32952	1833.3	2994.3	1.1048	0.86537	0.13463	0.26926	0.47195	TRUE	62	77	160	232
ACY3_55967_GTGCATGGCAAAGACTTCGT	ACY3	84.54	89.757	0.085409	13.611	771.01	0.18788	0.57402	0.42598	0.85196	0.92512	TRUE	23	37	57	57
ACY3_55968_TGAGGTCATGGTCCACGTAG	ACY3	42.27	63.976	0.58653	238.07	309.12	1.2345	0.89061	0.10939	0.21877	0.41428	TRUE	26	19	14	48
ACYP1_245_ACAGTGCAAGGACAATTGCA	ACYP1	749.23	534.72	-0.48586	23171	14186	1.8011	0.035847	0.96415	0.071694	0.19926	FALSE	259	257	450	303
ACYP1_246_TAGGCTGAGGGTAAAAAGCT	ACYP1	164.85	143.23	-0.20154	234.08	1870.9	0.49993	0.30851	0.69149	0.61703	0.77382	FALSE	53	76	103	74
ACYP1_247_TGGGTCCAGAACACTGACCG	ACYP1	233.54	332.29	0.50694	4913.4	2976.3	1.8101	0.96486	0.035142	0.070283	0.19673	TRUE	89	99	132	249
ACYP1_248_TTCCTGCATATGACGCACCT	ACYP1	250.45	323.7	0.36883	2693.6	3267.4	1.2814	0.89998	0.10002	0.20004	0.39184	TRUE	75	76	162	263
ACYP2_249_ACCAGCAAAGGCACCGTGAC	ACYP2	345.56	182.38	-0.91827	13647	5024.3	2.3021	0.010664	0.98934	0.021329	0.085844	FALSE	101	88	226	103
ACYP2_250_CGCCCAGTCACTCAAATCCG	ACYP2	154.29	259.72	0.74759	5651.5	1713	2.5475	0.99457	0.0054255	0.010851	0.052634	TRUE	65	71	81	201
ACYP2_251_GAGGTGTTCGGAAGAGTGCA	ACYP2	370.92	249.22	-0.5718	7478.1	5523.9	1.6374	0.050769	0.94923	0.10154	0.25137	FALSE	108	78	243	183
ACYP2_252_TGAAGCTAGGAAAATAGGAG	ACYP2	264.19	331.34	0.32563	2261.7	3508.9	1.1336	0.87152	0.12848	0.25697	0.45833	TRUE	110	101	140	246
ADA_253_CACAGACTGGTCCCCCAAGG	ADA	243.05	309.37	0.34682	2207.3	3139.2	1.1837	0.88174	0.11826	0.23652	0.43504	TRUE	80	71	150	253
ADA_254_TCACCGTACTGTCCACGCCG	ADA	361.41	338.02	-0.096242	273.56	5335.2	0.32019	0.37441	0.62559	0.74882	0.86251	FALSE	54	55	288	299
ADA_255_TCCCAGCTAACACAGCAGAG	ADA	133.15	56.337	-1.2263	3082.2	1408.3	2.0469	0.020144	0.97986	0.040288	0.13493	FALSE	38	25	88	34
ADA_256_TGGACATACTCAAGACAGAG	ADA	209.24	118.4	-0.81618	4207.7	2570.4	1.7916	0.036579	0.96342	0.073159	0.20206	FALSE	50	56	148	68
ADAD1_60069_AACTGGTGCAAGGCTGACAC	ADAD1	998.63	905.21	-0.14155	4366.3	20877	0.64655	0.25896	0.74104	0.51792	0.70088	FALSE	197	296	748	652
ADAD1_60070_AGGTGAATACAATTACAGCC	ADAD1	152.17	158.51	0.058467	20.068	1681.8	0.15447	0.56134	0.43866	0.87733	0.93846	TRUE	63	69	81	97
ADAD1_60071_CGATAACTACACCCACAGGA	ADAD1	122.58	111.72	-0.13275	59.047	1261.8	0.30585	0.37969	0.62031	0.75937	0.86902	FALSE	27	35	89	82
ADAD1_60072_TCAAATGCAGATATAGAATG	ADAD1	290.61	231.08	-0.32942	1777.7	3985.5	0.94296	0.17285	0.82715	0.3457	0.54981	FALSE	91	84	184	158
ADAD2_63481_ACAGAGATCCCGCGTGCCAG	ADAD2	479.76	157.55	-1.6004	55731	7797.8	3.6489	0.00013168	0.99987	0.00026336	0.0026245	FALSE	102	74	352	91
ADAD2_63482_CACTGCGAATAGCAAGACGG	ADAD2	336.05	139.41	-1.2633	20238	4840.2	2.8264	0.0023531	0.99765	0.0047061	0.02792	FALSE	56	13	262	133
ADAD2_63483_TCACCTACCTACGCTCAGGG	ADAD2	366.69	198.61	-0.88131	14452	5439.8	2.2789	0.011336	0.98866	0.022672	0.089874	FALSE	52	57	295	151
ADAD2_63484_TTCAAATATAGAGCCCCTGG	ADAD2	222.97	331.34	0.56931	5928.4	2797.9	2.0486	0.97975	0.02025	0.040501	0.13535	TRUE	57	75	154	272
ADAL_63465_ACTAATGGATCCATTCAAGT	ADAL	189.16	138.45	-0.4474	1293.2	2247	1.0696	0.14236	0.85764	0.28472	0.48881	FALSE	31	39	148	106
ADAL_63466_CAATCACAGTCATCTGATCG	ADAL	680.55	493.66	-0.46237	17575	12466	1.6738	0.047086	0.95291	0.094172	0.23895	FALSE	250	211	394	306
ADAL_63467_GGAGACTGTAAAACTTGCCG	ADAL	349.78	500.35	0.51523	11425	5106.8	2.1069	0.98244	0.017563	0.035126	0.12275	TRUE	72	60	259	464
ADAL_63468_TATGTGGAATCTATACTTGA	ADAL	454.4	408.68	-0.15264	1046	7250.2	0.53697	0.29564	0.70436	0.59129	0.75473	FALSE	76	87	354	341
ADAM10_261_CCCATAAATACGGTCCTCAG	ADAM10	82.426	56.337	-0.54104	343.39	745.61	0.95546	0.16862	0.83138	0.33724	0.54154	FALSE	34	25	44	34
ADAM10_262_GGAAATGGAATGGTAGAACA	ADAM10	171.19	89.757	-0.92395	3400.7	1967.3	1.8361	0.03312	0.96688	0.06624	0.18881	FALSE	22	31	140	63
ADAM10_263_TTCCATCAATAACAGACCCA	ADAM10	149	116.49	-0.3524	530.4	1635.4	0.80387	0.21065	0.78935	0.42129	0.61856	FALSE	30	46	111	76
ADAM10_264_TTTCAACCTACGAATGAAGA	ADAM10	169.08	162.33	-0.058455	22.808	1935	0.15353	0.43896	0.56104	0.87791	0.93884	FALSE	32	52	128	118
ADAM11_11265_GCTCATGGTCTACCGACGGG	ADAM11	500.9	571.96	0.19104	2527.7	8261.8	0.78181	0.78284	0.21716	0.43433	0.63061	TRUE	172	186	302	413
ADAM11_11266_GCTCCACGTATTGCGAGGAG	ADAM11	675.26	608.25	-0.15056	2247.1	12337	0.60337	0.27313	0.72687	0.54626	0.72239	FALSE	126	88	513	549
ADAM11_11267_GTTCGAGCAGATGCGACAGT	ADAM11	374.09	227.26	-0.71658	10945	5587.3	1.9644	0.024744	0.97526	0.049487	0.15521	FALSE	95	86	259	152
ADAM11_11268_TGGGAACTTGACTTACATCG	ADAM11	141.6	116.49	-0.27944	316.04	1528.3	0.64234	0.26022	0.73978	0.52044	0.70288	FALSE	61	38	73	84
ADAM12_21217_AAGCAATGGTACTTGCCCGG	ADAM12	117.3	313.19	1.4092	20298	1190.1	5.6785	1	6.7951e-09	1.359e-08	3.0295e-07	TRUE	40	72	71	256
ADAM12_21218_ACTGAACATTCGGATCGTGT	ADAM12	308.57	148.96	-1.0457	13151	4318.3	2.4289	0.0075709	0.99243	0.015142	0.067232	FALSE	91	48	201	108
ADAM12_21219_GGTGATCCTTATGGCAACTG	ADAM12	361.41	381.94	0.079519	210.9	5335.2	0.28115	0.6107	0.3893	0.77859	0.88084	TRUE	98	114	244	286
ADAM12_21220_TGCTGAATATTCGACTACAA	ADAM12	127.87	86.892	-0.55207	847.21	1334.5	1.1216	0.13081	0.86919	0.26161	0.46339	FALSE	10	22	111	69
ADAM15_22885_AGTGCCACTCGTACATTCAG	ADAM15	362.46	287.41	-0.33368	2825.8	5356.1	1.0255	0.15256	0.84744	0.30512	0.50939	FALSE	98	100	245	201
ADAM15_22886_CTCCAGACAGCTAATACTCG	ADAM15	482.93	374.3	-0.36675	5924	7866.9	1.2247	0.11034	0.88966	0.22067	0.41644	FALSE	206	177	251	215
ADAM15_22887_CTGTTGTCAAAATTGCCAGG	ADAM15	787.28	632.12	-0.31623	12074	15162	1.2601	0.10382	0.89618	0.20764	0.40124	FALSE	127	184	618	478
ADAM15_22888_TGGATTCGCGAAATAATGGG	ADAM15	605.52	370.49	-0.70724	28032	10656	2.2768	0.0114	0.9886	0.0228	0.090204	FALSE	135	124	438	264
ADAM17_18613_AATCAGAATCAACACAGATG	ADAM17	77.143	105.99	0.45329	418.68	683.06	1.1037	0.86493	0.13507	0.27013	0.47287	TRUE	63	43	10	68
ADAM17_18614_ACAAAATTTCAAGGTCGTGG	ADAM17	440.66	325.61	-0.43539	6656.7	6957.9	1.3793	0.083895	0.91611	0.16779	0.3496	FALSE	122	79	295	262
ADAM17_18615_CATCGCTTCTACAGATACAT	ADAM17	298	91.667	-1.69	23032	4121.7	3.2139	0.00065292	0.99935	0.0013058	0.01006	FALSE	38	23	244	73
ADAM17_18616_TGGTGAAAAGCACTACAACA	ADAM17	176.48	77.344	-1.1797	5116.6	2048.6	2.1903	0.014205	0.98579	0.02841	0.10563	FALSE	36	21	131	60
ADAM18_22881_AAAATCCCATTACCACACAC	ADAM18	99.334	127.95	0.36201	411.1	954.59	0.92622	0.82272	0.17728	0.35456	0.55821	TRUE	60	68	34	66
ADAM18_22882_AGTAAGTATGCTATGTCATG	ADAM18	172.25	193.84	0.16941	233.19	1983.5	0.4847	0.68604	0.31396	0.62793	0.78165	TRUE	33	39	130	164
ADAM18_22883_AGTGCCTGCTATTGACAACT	ADAM18	354.01	303.65	-0.22073	1270.2	5189.5	0.69915	0.24223	0.75777	0.48446	0.67398	FALSE	88	62	247	256
ADAM18_22884_TATAACAGTCAATTTGAACT	ADAM18	68.689	24.826	-1.4321	1021.3	585.94	1.812	0.032793	0.96721	0.065586	0.18746	FALSE	24	13	41	13
ADAM19_22809_ATGCCTCTAATTGTACCCTG	ADAM19	497.73	531.86	0.095494	582.54	8191.8	0.37707	0.64694	0.35306	0.70612	0.83493	TRUE	154	119	317	438
ADAM19_22810_CCTCTAAATAATCAGCCACG	ADAM19	88.767	94.531	0.089788	16.617	822.45	0.201	0.57924	0.42076	0.84153	0.91875	TRUE	17	16	67	83
ADAM19_22811_GTCACGCTCAGCACTTGCCG	ADAM19	200.78	208.16	0.051804	27.214	2432.9	0.14957	0.55944	0.44056	0.88113	0.94057	TRUE	49	36	141	182
ADAM19_22812_TGCCCAGAGATGCGAAGTGT	ADAM19	302.23	333.25	0.1405	481.28	4200.1	0.47858	0.68388	0.31612	0.63223	0.78466	TRUE	91	145	195	204
ADAM2_6617_ATGTGTGATGCAAACTATGC	ADAM2	322.31	334.2	0.052116	70.724	4577.3	0.17578	0.56977	0.43023	0.86047	0.9297	TRUE	114	100	191	250
ADAM2_6618_CTTTAAATTACAAAGCGTAG	ADAM2	73.972	108.85	0.55116	613.99	646.2	1.3722	0.91484	0.085157	0.17031	0.35302	TRUE	20	11	50	103
ADAM2_6619_GACCTCCCTGAATATTGCAA	ADAM2	503.01	726.65	0.52978	25217	8308.6	2.4534	0.99293	0.0070747	0.014149	0.06391	TRUE	109	123	367	638
ADAM2_6620_TTGAAAAAAGGATCTAAGCG	ADAM2	401.56	483.16	0.26626	3336	6143.5	1.041	0.85106	0.14894	0.29787	0.50248	TRUE	102	81	278	425
ADAM20_22877_AATGTGACTGTGGAACCATA	ADAM20	827.43	761.02	-0.12055	2206.2	16211	0.52159	0.30098	0.69902	0.60195	0.76265	FALSE	286	280	497	517
ADAM20_22878_AGAGATACATTGTCCACATG	ADAM20	865.48	783.94	-0.14258	3326.2	17221	0.62133	0.26719	0.73281	0.53438	0.71351	FALSE	260	200	559	621
ADAM20_22879_GGTGTGTGTGCGAGCTACAG	ADAM20	403.68	330.38	-0.28828	2692.9	6186.9	0.93185	0.17571	0.82429	0.35141	0.55522	FALSE	138	108	244	238
ADAM20_22880_TAAGGGCAACCAAGGACTCA	ADAM20	811.58	874.65	0.10784	1989.5	15795	0.50183	0.69211	0.30789	0.61579	0.77289	TRUE	331	334	437	582
ADAM21_22873_ATATTCCTGCAACATAGGCT	ADAM21	576.98	731.42	0.34165	11967	9987.9	1.5453	0.93887	0.061135	0.12227	0.28423	TRUE	161	160	385	606
ADAM21_22874_GAAACACGTTGTTCATATGA	ADAM21	395.22	494.62	0.32291	4955	6013.9	1.2817	0.90002	0.099978	0.19996	0.3917	TRUE	130	164	244	354
ADAM21_22875_GCATAATCCTCCAAGATTGG	ADAM21	603.4	684.63	0.18193	3302.5	10607	0.78874	0.78487	0.21513	0.43026	0.62706	TRUE	159	190	412	527
ADAM21_22876_TGGGTTCAATTTCATAAGTG	ADAM21	555.85	375.26	-0.56556	16463	9500	1.8528	0.031955	0.96805	0.06391	0.18436	FALSE	124	91	402	302
ADAM22_39599_ATAGGTATTGGTATGTACAA	ADAM22	207.12	223.44	0.10888	133.13	2535.8	0.32398	0.62701	0.37299	0.74597	0.86056	TRUE	60	103	136	131
ADAM22_39600_CTTAGGTGAATGTAAATGCG	ADAM22	585.44	376.21	-0.63659	22153	10185	2.0732	0.019078	0.98092	0.038157	0.12984	FALSE	122	117	432	277
ADAM22_39601_TACTACCAGGGCCATATCCG	ADAM22	596.01	528.99	-0.17177	2247.4	10432	0.6561	0.25588	0.74412	0.51176	0.69578	FALSE	90	101	474	453
ADAM22_39602_TGTATTTCATAAACTCACGT	ADAM22	94.051	64.93	-0.52775	427.6	887.9	0.97726	0.16355	0.83645	0.3271	0.53197	FALSE	47	31	42	37
ADAM23_22869_ACATATAATCCAGAAAACCT	ADAM23	133.15	59.201	-1.156	2843.2	1408.3	1.9706	0.024198	0.9758	0.048395	0.15292	FALSE	38	34	88	28
ADAM23_22870_AGGCGTCAAAGACTCCAAGG	ADAM23	145.83	65.885	-1.1344	3318.3	1589.3	2.0054	0.022337	0.97766	0.044675	0.14468	FALSE	55	26	83	43
ADAM23_22871_ATATTACATCAACCAAGACT	ADAM23	247.28	142.27	-0.79318	5616.9	3212.3	1.8527	0.031957	0.96804	0.063914	0.18437	FALSE	40	22	194	127
ADAM23_22872_GGATACTTACAGAATCCACA	ADAM23	36.986	33.42	-0.14222	6.3626	259.43	0.2214	0.40596	0.59404	0.81191	0.90172	FALSE	34	14	1	21
ADAM28_29351_CATACTACTAGTTTGGTGGC	ADAM28	300.12	227.26	-0.39967	2667.1	4160.8	1.1295	0.12934	0.87066	0.25867	0.46028	FALSE	117	98	167	140
ADAM28_29352_TAAAAAGCTCAATACTCATG	ADAM28	453.34	338.02	-0.42242	6685.6	7227.6	1.3565	0.087467	0.91253	0.17493	0.359	FALSE	162	109	267	245
ADAM28_29353_TAGGCAATGGAGCATTAAAG	ADAM28	512.52	438.28	-0.22529	2760.2	8520	0.80432	0.2106	0.7894	0.42121	0.61849	FALSE	109	119	376	340
ADAM28_29354_TTAAGCCCCATACATCGGGA	ADAM28	681.6	308.42	-1.1415	72298	12492	3.3389	0.00042061	0.99958	0.00084121	0.0070214	FALSE	50	112	595	211
ADAM29_30079_ACTGCAAGTTCCTACCATCA	ADAM29	437.49	575.78	0.39547	9606.5	6890.9	1.6659	0.95213	0.04787	0.095739	0.24167	TRUE	189	166	225	437
ADAM29_30080_AGTCGGAGAACATTACGCCC	ADAM29	540	342.79	-0.65408	19693	9138.3	2.0629	0.01956	0.98044	0.03912	0.13211	FALSE	96	87	415	272
ADAM29_30081_GTATACCAGATGTTCAAACG	ADAM29	218.75	267.36	0.28833	1184.6	2727.4	0.93086	0.82403	0.17597	0.35193	0.55576	TRUE	61	88	146	192
ADAM29_30082_TTTGGGCATGAACCATGATG	ADAM29	511.47	468.84	-0.1253	909.09	8496.5	0.46248	0.32187	0.67813	0.64373	0.79238	FALSE	153	102	331	389
ADAM30_30075_AATACTGCCAATGTAGGGGT	ADAM30	168.02	183.33	0.1251	117.26	1918.9	0.3495	0.63662	0.36338	0.72676	0.84806	TRUE	87	71	72	121
ADAM30_30076_ATGTGGAAACAAAATTGTGG	ADAM30	61.291	113.63	0.87986	1401.6	504.13	2.331	0.99009	0.0099087	0.019817	0.081391	TRUE	35	66	23	53
ADAM30_30077_CCAAAGGACTGCAACTACAT	ADAM30	163.8	213.89	0.38291	1260.2	1854.9	1.1631	0.87759	0.12241	0.24481	0.44457	TRUE	62	30	93	194
ADAM30_30078_CCCCTTATGAGAATAAGGCG	ADAM30	62.348	109.81	0.8067	1148.5	515.63	2.0901	0.98164	0.01836	0.03672	0.12644	TRUE	32	37	27	78
ADAM32_65049_AAATCTCCGAAACCAGTCTG	ADAM32	463.91	402.95	-0.20278	1860.5	7454.3	0.70608	0.24007	0.75993	0.48014	0.67092	FALSE	54	87	385	335
ADAM32_65050_AACACTGCTCCCAAATAACG	ADAM32	217.69	98.351	-1.1383	7394.3	2709.8	2.2925	0.010924	0.98908	0.021847	0.08742	FALSE	63	42	143	61
ADAM32_65051_AAGCCTGAAAGAACAACCAA	ADAM32	191.27	212.93	0.15402	234.8	2280.5	0.45362	0.67494	0.32506	0.65012	0.79716	TRUE	55	46	126	177
ADAM32_65052_TACAATCAGGCGTTGAATGT	ADAM32	392.05	197.66	-0.98445	19438	5949.4	2.5203	0.0058624	0.99414	0.011725	0.055701	FALSE	52	68	319	139
ADAM33_51155_CACAGGGTGAGCCGTCCAGT	ADAM33	105.67	135.59	0.35663	449.19	1036.2	0.92933	0.82355	0.17645	0.3529	0.55672	TRUE	41	26	59	116
ADAM33_51156_CCCCCCACCCGCGTACCCGG	ADAM33	246.22	123.18	-0.99341	7792.3	3194	2.1772	0.014726	0.98527	0.029452	0.10848	FALSE	101	48	132	81
ADAM33_51157_CTCCATCCGAAAGATCTCGT	ADAM33	76.086	190.97	1.3164	6936.2	670.72	4.4361	1	4.5887e-06	9.1774e-06	0.00013188	TRUE	59	71	13	129
ADAM33_51158_GTGGGTTTCTATGTATCCTG	ADAM33	354.01	76.389	-2.1977	43683	5189.5	3.8538	5.7702e-05	0.99994	0.0001154	0.0012807	FALSE	29	5	306	75
ADAM7_22893_AAAGATCCTTAAAACACGGA	ADAM7	321.25	458.33	0.51135	9469.4	4557.3	2.0306	0.97885	0.021147	0.042295	0.13935	TRUE	145	100	159	380
ADAM7_22894_ACAGAATGGCACATCAACTG	ADAM7	775.65	820.22	0.080506	993.5	14862	0.36561	0.64267	0.35733	0.71466	0.8404	TRUE	179	155	555	704
ADAM7_22895_CATTTGCAAATACCTGAGCA	ADAM7	347.67	515.62	0.56725	14240	5065.5	2.3598	0.99086	0.0091419	0.018284	0.077015	TRUE	160	175	169	365
ADAM7_22896_CCATAAGATACCATGATCTG	ADAM7	439.61	342.79	-0.35795	4704.4	6935.6	1.1625	0.12252	0.87748	0.24504	0.44483	FALSE	153	171	263	188
ADAM8_257_AGTCCGGGTACCCCTCTACG	ADAM8	741.84	683.68	-0.11762	1691.9	13998	0.49156	0.31152	0.68848	0.62303	0.77797	FALSE	243	205	459	511
ADAM8_258_CAAACAGGTTCCCACACACG	ADAM8	168.02	175.69	0.064035	29.428	1918.9	0.17512	0.56948	0.43052	0.86104	0.92999	TRUE	44	52	115	132
ADAM8_259_CCACATACAGCTCCACGTAG	ADAM8	259.96	192.88	-0.42865	2262.2	3434.1	1.1447	0.12617	0.87383	0.25234	0.45305	FALSE	47	45	199	157
ADAM8_260_CCAGCTTAGACTCACCAAGT	ADAM8	152.17	169.97	0.15855	158.42	1681.8	0.43387	0.66778	0.33222	0.66445	0.80714	TRUE	87	62	57	116
ADAM9_22889_AAAAGTTTCTTATCACACGT	ADAM9	153.23	168.06	0.13243	109.98	1697.4	0.35988	0.6405	0.3595	0.71901	0.84338	TRUE	42	56	103	120
ADAM9_22890_GAATTGGACCCTTGCTGCGA	ADAM9	179.65	132.73	-0.4339	1107.1	2097.7	1.0245	0.15277	0.84723	0.30554	0.50977	FALSE	25	27	145	112
ADAM9_22891_GCTGTTCATTGTCGTAGACA	ADAM9	264.19	179.51	-0.5549	3618	3508.9	1.4294	0.076438	0.92356	0.15288	0.32952	FALSE	90	76	160	112
ADAM9_22892_TGTGGTTTATACTTACAACA	ADAM9	41.213	42.969	0.058783	1.5411	299.02	0.10152	0.53646	0.46354	0.92709	0.96546	TRUE	7	0	32	45
ADAMDEC1_35971_AATGTCTTACCACATTGAGT	ADAMDEC1	321.25	255.9	-0.32697	2142.1	4557.3	0.96803	0.16651	0.83349	0.33303	0.5376	FALSE	69	71	235	197
ADAMDEC1_35972_CGTCTTTACATCTAACCAGG	ADAMDEC1	92.994	62.066	-0.57571	483.11	874.71	1.0457	0.14713	0.85287	0.29427	0.49869	FALSE	21	10	67	55
ADAMDEC1_35973_GATGGCACAGTTCTAACCTG	ADAMDEC1	959.53	614.93	-0.64106	60102	19785	2.4499	0.0071451	0.99285	0.01429	0.064385	FALSE	215	205	693	439
ADAMDEC1_35974_TGATGTGTGAAGTATCCTCT	ADAMDEC1	349.78	336.11	-0.057359	93.485	5106.8	0.19133	0.42413	0.57587	0.84826	0.92266	FALSE	76	128	255	224
ADAMTS1_25049_CTATGTGGAAACCATGCTTG	ADAMTS1	292.72	301.74	0.043621	40.65	4024.3	0.14213	0.55651	0.44349	0.88698	0.94393	TRUE	68	70	209	246
ADAMTS1_25050_GAAAGCGGAGACCGAAGACG	ADAMTS1	231.43	264.5	0.19191	547.36	2940.4	0.60983	0.72901	0.27099	0.54198	0.71971	TRUE	124	89	95	188
ADAMTS1_25051_GAGGAGTCCAGTACACGATG	ADAMTS1	394.17	294.1	-0.42127	5033.8	5992.4	1.2927	0.098054	0.90195	0.19611	0.38687	FALSE	83	50	290	258
ADAMTS1_25052_GTAATCATGTAGGCACTGCA	ADAMTS1	889.78	524.22	-0.76216	67974	17875	2.7343	0.0031259	0.99687	0.0062518	0.034703	FALSE	275	199	567	350
ADAMTS10_51915_ATCGCGTCAGTGTAAATACG	ADAMTS10	535.77	534.72	-0.0028246	0.55114	9042.4	0.011041	0.4956	0.5044	0.99119	0.99582	FALSE	170	159	337	401
ADAMTS10_51916_GGCATGAACCATGACGGCGT	ADAMTS10	227.2	227.26	0.00035242	0.0015541	2868.9	0.0010409	0.50041	0.49959	0.99918	0.99958	TRUE	83	106	132	132
ADAMTS10_51917_TACAAGTGGAAAACGTACCG	ADAMTS10	312.8	364.76	0.22105	1351.9	4397.6	0.78353	0.78334	0.21666	0.43332	0.62952	TRUE	124	95	172	287
ADAMTS10_51918_TGCCATTCCAGAGAACGGTG	ADAMTS10	105.67	164.24	0.63131	1735.3	1036.2	1.8192	0.96554	0.034456	0.068912	0.19402	TRUE	14	31	86	141
ADAMTS12_51907_AACATCATAGATCACTCCGG	ADAMTS12	50.724	125.09	1.2855	2900.7	392.87	3.7517	0.99991	8.8274e-05	0.00017655	0.0018546	TRUE	34	7	14	124
ADAMTS12_51908_AATGCCACCGAGGATCGCTG	ADAMTS12	114.13	144.18	0.33463	453.19	1147.6	0.88721	0.81245	0.18755	0.37511	0.57736	TRUE	47	33	61	118
ADAMTS12_51909_GTACTACAGAATTTCTCACG	ADAMTS12	304.34	169.97	-0.83673	9217.5	4239.4	2.0639	0.019514	0.98049	0.039029	0.13189	FALSE	72	67	216	111
ADAMTS12_51910_TTGGTGCCTCTGAGCGACAG	ADAMTS12	176.48	357.12	1.0128	16811	2048.6	3.9911	0.99997	3.2886e-05	6.5773e-05	0.00078217	TRUE	57	60	110	314
ADAMTS13_30091_AGCACCACACTCACTAGGGA	ADAMTS13	314.91	406.77	0.36824	4236.3	4437.4	1.379	0.91605	0.083949	0.1679	0.34973	TRUE	96	96	202	330
ADAMTS13_30092_CATGGGCGCTGGTCTAGCTG	ADAMTS13	84.54	183.33	1.1076	5058.1	771.01	3.5579	0.99981	0.00018712	0.00037424	0.0035417	TRUE	63	62	17	130
ADAMTS13_30093_GGCAACTCCAGGTCAAACCT	ADAMTS13	411.07	283.59	-0.53401	8195.3	6339.2	1.6011	0.054672	0.94533	0.10934	0.2641	FALSE	102	114	287	183
ADAMTS13_30094_TGGTCGTGTCGAGTACAGAG	ADAMTS13	440.66	421.09	-0.065388	191.53	6957.9	0.23462	0.40725	0.59275	0.8145	0.90278	FALSE	101	168	316	273
ADAMTS14_60965_CAGACCTGGTACTCGAACAT	ADAMTS14	87.71	178.56	1.0173	4254.2	809.51	3.1931	0.9993	0.0007046	0.0014092	0.010693	TRUE	65	33	18	154
ADAMTS14_60966_CAGGAGTGTGTGTACACTGG	ADAMTS14	469.2	206.25	-1.1819	35989	7568.4	3.0225	0.0012534	0.99875	0.0025069	0.016955	FALSE	113	111	331	105
ADAMTS14_60967_GGTCTCATGAGCTATCACGA	ADAMTS14	46.497	160.42	1.7649	7071.7	350.37	6.086	1	5.8263e-10	1.1653e-09	2.9327e-08	TRUE	36	26	8	142
ADAMTS14_60968_TGACCTTTGAAGCACCACTG	ADAMTS14	386.77	249.22	-0.63201	9573.4	5842.3	1.7996	0.035963	0.96404	0.071925	0.1998	FALSE	89	74	277	187
ADAMTS15_64209_AGCGTTTCGTGTCTATCCCG	ADAMTS15	298	212.93	-0.483	3643.8	4121.7	1.3251	0.092575	0.90743	0.18515	0.37282	FALSE	94	66	188	157
ADAMTS15_64210_CAACCCCATCAACATCGTTG	ADAMTS15	1075.8	905.21	-0.2488	14573	23077	1.1228	0.13076	0.86924	0.26153	0.46331	FALSE	218	238	800	710
ADAMTS15_64211_CATGGGGCATGTTGAACACG	ADAMTS15	1719.3	1189.8	-0.53081	141410	43409	2.5418	0.0055147	0.99449	0.011029	0.053227	FALSE	298	285	1329	961
ADAMTS15_64212_GCGACGCTGCTTCTATTCTG	ADAMTS15	486.1	444.01	-0.13039	886.42	7936.3	0.47252	0.31828	0.68172	0.63656	0.78782	FALSE	145	148	315	317
ADAMTS16_64213_AAGAAGACCAGTCCGACCAG	ADAMTS16	268.41	579.6	1.1077	50167	3584.1	5.1979	1	1.0077e-07	2.0155e-07	3.8481e-06	TRUE	100	105	154	502
ADAMTS16_64214_AGATGGGACTCCATGCTCGG	ADAMTS16	203.95	195.75	-0.058953	33.674	2484.2	0.16464	0.4346	0.5654	0.8692	0.93403	FALSE	86	80	107	125
ADAMTS16_64215_GGGACACGTAATCGCCCCTG	ADAMTS16	187.04	240.62	0.36169	1441.1	2213.6	1.1388	0.87261	0.12739	0.25478	0.45608	TRUE	22	51	155	201
ADAMTS16_64216_GTTGAGTATCGTGAGCACGT	ADAMTS16	563.25	250.17	-1.1676	50970	9670	3.1837	0.00072702	0.99927	0.001454	0.010983	FALSE	58	69	475	193
ADAMTS17_64217_AGAAAAGAAGAAGCCGACGT	ADAMTS17	168.02	371.44	1.1398	21482	1918.9	4.6436	1	1.7117e-06	3.4233e-06	5.3373e-05	TRUE	120	106	39	283
ADAMTS17_64218_AGTAGAAGCACAGCTCGGCG	ADAMTS17	429.04	382.9	-0.16374	1065.4	6713.1	0.56315	0.28667	0.71333	0.57333	0.7431	FALSE	137	146	269	255
ADAMTS17_64219_GAGACTGATCTCTGCGTGCA	ADAMTS17	1218.4	888.97	-0.45437	54606	27290	1.9943	0.023057	0.97694	0.046115	0.1478	FALSE	339	323	814	608
ADAMTS17_64220_GCATGTGCAGCCGAACATGT	ADAMTS17	765.09	673.18	-0.18438	4228	14591	0.76089	0.22336	0.77664	0.44672	0.64175	FALSE	247	246	477	459
ADAMTS18_64221_AGGCCAGTGCGTAAAGTTTG	ADAMTS18	512.52	444.01	-0.20659	2350	8520	0.74226	0.22897	0.77103	0.45793	0.6523	FALSE	218	178	267	287
ADAMTS18_64222_CCGAAGTTGTACCATCAATG	ADAMTS18	594.95	599.65	0.01134	11.058	10408	0.046097	0.51838	0.48162	0.96323	0.98234	TRUE	147	201	416	427
ADAMTS18_64223_GTGACTGCTCAAAATCGCCG	ADAMTS18	452.29	301.74	-0.58237	11448	7205	1.7737	0.03806	0.96194	0.076119	0.20734	FALSE	73	106	355	210
ADAMTS18_64224_TATTGGAAGTGACATAAACG	ADAMTS18	357.18	327.52	-0.12472	440.18	5251.8	0.40933	0.34115	0.65885	0.6823	0.81956	FALSE	112	135	226	208
ADAMTS19_64257_ATGCAGCTATACTTATAACA	ADAMTS19	183.87	48.698	-1.8953	10073	2163.7	2.906	0.0017917	0.99821	0.0035834	0.02251	FALSE	30	23	144	28
ADAMTS19_64258_CCACTGAAGTATATGCTTTG	ADAMTS19	159.57	154.69	-0.044542	11.916	1791.5	0.11534	0.45404	0.54596	0.90809	0.95577	FALSE	78	54	73	108
ADAMTS19_64259_GACCATCAGCACACGATGGG	ADAMTS19	1629.5	1535.4	-0.085752	4427.6	40379	0.46824	0.31981	0.68019	0.63961	0.78982	FALSE	408	406	1134	1202
ADAMTS19_64260_TCTGCCTATATACACGGTGT	ADAMTS19	368.81	422.05	0.19406	1419	5481.9	0.71911	0.76396	0.23604	0.47207	0.66406	TRUE	160	143	189	299
ADAMTS2_25045_AGCACGCCAACAGCTCGAGG	ADAMTS2	736.55	557.64	-0.40083	16083	13864	1.5195	0.064317	0.93568	0.12863	0.29459	FALSE	218	227	479	357
ADAMTS2_25046_CCTGACATCCTCAAACGGGA	ADAMTS2	322.31	388.63	0.26919	2204	4577.3	0.98025	0.83652	0.16348	0.32696	0.53181	TRUE	107	87	198	320
ADAMTS2_25047_CGTGATCGTGGTATTCATCG	ADAMTS2	627.71	632.12	0.010081	9.7184	11184	0.041688	0.51663	0.48337	0.96675	0.98402	TRUE	190	214	404	448
ADAMTS2_25048_GAGCTTCCCCGGAGGCAACG	ADAMTS2	611.86	647.39	0.081322	631.59	10807	0.34186	0.63377	0.36623	0.73246	0.85157	TRUE	201	138	378	540
ADAMTS20_50679_AGTGAATGTTCATCCCAATG	ADAMTS20	126.81	158.51	0.31962	503.9	1319.9	0.87247	0.80848	0.19152	0.38304	0.58475	TRUE	51	37	69	129
ADAMTS20_50680_GCCTCCGCATAAGCTGACGA	ADAMTS20	86.653	217.71	1.3191	9026.9	796.63	4.6433	1	1.7164e-06	3.4329e-06	5.3511e-05	TRUE	49	47	33	181
ADAMTS20_50681_GGCTGCTAGTGAATGGAGCG	ADAMTS20	304.34	180.47	-0.75071	7801.9	4239.4	1.9025	0.028549	0.97145	0.057098	0.17114	FALSE	106	88	182	101
ADAMTS20_50682_GTGGCATTCCCTCTAATGTG	ADAMTS20	224.03	131.77	-0.76119	4329.9	2815.7	1.7387	0.041033	0.95897	0.082065	0.21828	FALSE	32	28	180	110
ADAMTS3_25041_CCACATTTATATGCACTCCG	ADAMTS3	187.04	136.54	-0.45117	1282.9	2213.6	1.0733	0.14153	0.85847	0.28305	0.48698	FALSE	22	20	155	123
ADAMTS3_25042_TGGCTATAAAATGTGCACCG	ADAMTS3	78.199	66.84	-0.22335	64.614	695.46	0.43074	0.33232	0.66768	0.66464	0.80724	FALSE	46	57	28	13
ADAMTS3_25043_TGTGGTGATGAGACTGCTAT	ADAMTS3	473.42	253.99	-0.89572	24649	7659.9	2.5072	0.006085	0.99392	0.01217	0.057219	FALSE	139	81	309	185
ADAMTS3_25044_TGTGTTAATCCAAGAAGACG	ADAMTS3	179.65	183.33	0.02914	6.793	2097.7	0.080476	0.53205	0.46795	0.9359	0.96968	TRUE	50	41	120	151
ADAMTS4_25037_AGCGCTTTAGCCCCGCACCG	ADAMTS4	734.44	627.34	-0.22706	5743.8	13811	0.91132	0.18106	0.81894	0.36213	0.56537	FALSE	285	208	410	449
ADAMTS4_25038_AGGGGCCATGACATGGCGAG	ADAMTS4	242	497.48	1.0366	33673	3121	4.5732	1	2.4013e-06	4.8025e-06	7.2995e-05	TRUE	92	91	137	430
ADAMTS4_25039_CATACCCAGCGTGTCGCAAG	ADAMTS4	262.07	449.74	0.77683	17926	3471.5	3.1851	0.99928	0.00072345	0.0014469	0.010938	TRUE	76	151	172	320
ADAMTS4_25040_CCAGACCAAACACTCGCCCT	ADAMTS4	232.48	371.44	0.67368	9785.5	2958.3	2.5548	0.99469	0.0053128	0.010626	0.051786	TRUE	93	78	127	311
ADAMTS5_30103_AACATCGACCAACTCTACTC	ADAMTS5	664.69	411.54	-0.69031	32498	12078	2.3035	0.010626	0.98937	0.021253	0.085617	FALSE	110	85	519	346
ADAMTS5_30104_CTGCACGTCTACACCCGCGA	ADAMTS5	254.68	316.06	0.31043	1889.4	3341.2	1.0619	0.85586	0.14414	0.28828	0.49279	TRUE	68	68	173	263
ADAMTS5_30105_CTGCTTCTATCGGGGCACAG	ADAMTS5	97.221	154.69	0.66455	1673.2	927.77	1.8867	0.97038	0.029624	0.059247	0.17535	TRUE	62	56	30	106
ADAMTS5_30106_TGTGCTGTGATTGAAGACGA	ADAMTS5	606.57	567.19	-0.096694	775.88	10681	0.3811	0.35157	0.64843	0.70313	0.83282	FALSE	151	170	423	424
ADAMTS6_30371_AGCATCATACACCTGACCTG	ADAMTS6	243.05	275	0.17748	510.81	3139.2	0.5702	0.71573	0.28427	0.56854	0.74001	TRUE	69	81	161	207
ADAMTS6_30372_TAATAAGAACTGCATTATCG	ADAMTS6	107.79	87.847	-0.29213	199.34	1063.8	0.6114	0.27012	0.72988	0.54024	0.71846	FALSE	47	26	55	66
ADAMTS6_30373_TGGCCCCAGAGCATAGATGG	ADAMTS6	923.6	562.41	-0.71463	66220	18795	2.6346	0.0042119	0.99579	0.0084238	0.043509	FALSE	157	162	717	427
ADAMTS6_30374_TTAGACAACTGTCATTACAC	ADAMTS6	212.41	219.62	0.047945	26.004	2622.5	0.14082	0.55599	0.44401	0.88803	0.94454	TRUE	98	95	103	135
ADAMTS7_30367_GAAAAGCATCAACATGAAGG	ADAMTS7	200.78	570.05	1.5008	72615	2432.9	7.4866	1	3.5344e-14	7.0688e-14	2.5604e-12	TRUE	59	66	131	531
ADAMTS7_30368_GCCCGTAGGACAGATCCTCG	ADAMTS7	85.597	172.83	1.0053	3919.6	783.79	3.1159	0.99908	0.00091803	0.0018361	0.013209	TRUE	41	34	40	147
ADAMTS7_30369_GGACGCCAGGTGGCACCGAG	ADAMTS7	53.894	29.601	-0.84309	301.58	425.52	1.1777	0.11549	0.88451	0.23097	0.42848	FALSE	18	17	33	14
ADAMTS7_30370_TTCTACGAGCTACAATACCG	ADAMTS7	91.937	229.17	1.3084	9889.6	861.57	4.6752	1	1.4695e-06	2.939e-06	4.6496e-05	TRUE	33	15	54	225
ADAMTS8_30099_AAACCGCTTGGTCCTACTCG	ADAMTS8	284.27	360.94	0.34343	2949.7	3869.7	1.2325	0.89112	0.10888	0.21775	0.41294	TRUE	77	96	192	282
ADAMTS8_30100_AAGGACCCCGAGCCTCAGAA	ADAMTS8	445.95	451.65	0.018286	16.25	7070	0.067801	0.52703	0.47297	0.94594	0.97427	TRUE	184	140	238	333
ADAMTS8_30101_CCACCCAGAGCACTACGACA	ADAMTS8	356.12	275.95	-0.36678	3226.6	5231	1.1085	0.13383	0.86617	0.26767	0.47035	FALSE	94	101	243	188
ADAMTS8_30102_TTCAAGATCGAGCGCCTCGG	ADAMTS8	515.69	635.94	0.30184	7249	8590.8	1.2973	0.90274	0.097262	0.19452	0.38479	TRUE	148	166	340	500
ADAMTS9_44819_ACTGAAAGGTAACTCACACA	ADAMTS9	378.32	319.88	-0.24137	1710.5	5671.9	0.77594	0.21889	0.78111	0.43778	0.63407	FALSE	110	98	248	237
ADAMTS9_44820_AGCCCGGAGAGATAAATGTG	ADAMTS9	170.14	317.97	0.89827	11190	1951.1	3.3468	0.99959	0.00040883	0.00081766	0.0068551	TRUE	69	61	92	272
ADAMTS9_44821_CTGCGCCTATAAATGATGTG	ADAMTS9	380.43	250.17	-0.60273	8575.7	5714.4	1.7231	0.042434	0.95757	0.084869	0.2233	FALSE	102	92	258	170
ADAMTS9_44822_TGAAAGAATAGCGTACATCG	ADAMTS9	339.22	293.14	-0.20994	1062.8	4901.4	0.65811	0.25523	0.74477	0.51047	0.69514	FALSE	74	98	247	209
ADAMTSL1_56393_AGGTGCTAGTTCAACAACCA	ADAMTSL1	121.53	91.667	-0.40297	448	1247.3	0.84545	0.1987	0.8013	0.39739	0.59781	FALSE	47	47	68	49
ADAMTSL1_56394_CAGCTCGACGCACGTCACGG	ADAMTSL1	82.426	267.36	1.6856	18497	745.61	6.7727	1	6.3287e-12	1.2657e-11	3.8289e-10	TRUE	37	34	41	246
ADAMTSL1_56395_TGGAATTGACAACCGTTGAG	ADAMTSL1	185.99	384.81	1.0449	20403	2196.9	4.2418	0.99999	1.1085e-05	2.217e-05	0.00029409	TRUE	62	86	114	317
ADAMTSL1_56396_TGTATGACTGGGAGTATGAG	ADAMTSL1	207.12	159.46	-0.37521	1140.6	2535.8	0.94646	0.17194	0.82806	0.34388	0.54814	FALSE	87	78	109	89
ADAMTSL2_25725_CGTACGCAGACATGACCCCT	ADAMTSL2	358.24	369.53	0.044655	63.771	5272.6	0.15552	0.5618	0.4382	0.87641	0.93796	TRUE	118	89	221	298
ADAMTSL2_25726_CGTCCGCCCGTTGTACACGT	ADAMTSL2	97.221	182.38	0.90072	3714	927.77	2.7958	0.99741	0.0025906	0.0051812	0.030057	TRUE	42	33	50	158
ADAMTSL2_25727_GACCGGAATCGAGTACATCG	ADAMTSL2	149	161.37	0.11432	76.536	1635.4	0.30588	0.62011	0.37989	0.75978	0.86933	TRUE	52	40	89	129
ADAMTSL2_25728_TGACGGGCAACTATCGCAAG	ADAMTSL2	169.08	286.46	0.75714	7007	1935	2.6684	0.99619	0.0038112	0.0076225	0.040252	TRUE	62	79	98	221
ADAMTSL3_45243_ATTTCTGGAATCGTCGCACG	ADAMTSL3	171.19	265.45	0.62984	4495.2	1967.3	2.1251	0.98321	0.016789	0.033578	0.11891	TRUE	58	58	104	220
ADAMTSL3_45244_CCAAACTATTGGCTTCGCTG	ADAMTSL3	195.5	214.84	0.13547	187.22	2347.9	0.39924	0.65513	0.34487	0.68974	0.82421	TRUE	42	60	143	165
ADAMTSL3_45245_CCTTGCACAGCAACATGCGT	ADAMTSL3	163.8	122.22	-0.41942	868.8	1854.9	0.96529	0.16714	0.83286	0.33428	0.53879	FALSE	62	53	93	75
ADAMTSL3_45246_GCAGCAGGATCATTATATCG	ADAMTSL3	165.91	173.78	0.066511	31.012	1886.9	0.18129	0.5719	0.4281	0.85619	0.92727	TRUE	81	78	76	104
ADAMTSL4_40103_AGGACGGTTATATCGAAAGA	ADAMTSL4	412.13	644.53	0.64388	27339	6361	2.9139	0.99822	0.0017849	0.0035699	0.022443	TRUE	192	162	198	513
ADAMTSL4_40104_CCTTCTCCTAAGGAGTGCGT	ADAMTSL4	576.98	356.16	-0.69445	24732	9987.9	2.2096	0.013568	0.98643	0.027136	0.10224	FALSE	121	85	425	288
ADAMTSL4_40105_GCTGCGTACTGGAAACGAGT	ADAMTSL4	257.85	300.78	0.2214	923.04	3396.9	0.73665	0.76933	0.23067	0.46134	0.65515	TRUE	84	106	160	209
ADAMTSL4_40106_GGGGGCCCCCTCGGTCAGTG	ADAMTSL4	391	592.97	0.59954	20616	5928	2.6232	0.99564	0.004355	0.00871	0.04467	TRUE	191	191	179	430
ADAMTSL5_68925_AGAACTCAAACTCGATGCCA	ADAMTSL5	121.53	285.5	1.2255	14038	1247.3	4.6429	1	1.7182e-06	3.4364e-06	5.3544e-05	TRUE	50	57	65	242
ADAMTSL5_68926_GCACACTGTAGGTCTCGGAA	ADAMTSL5	482.93	462.15	-0.063324	215.97	7866.9	0.2343	0.40737	0.59263	0.81475	0.90283	FALSE	124	128	333	356
ADAMTSL5_68927_GGATGTGTCTGGCGCCCTCG	ADAMTSL5	355.07	232.99	-0.60573	7534	5210.3	1.6913	0.045389	0.95461	0.090779	0.23331	FALSE	82	65	254	179
ADAMTSL5_68928_TGGTCTACACCCGAGACACA	ADAMTSL5	310.68	252.08	-0.30047	1721.7	4357.9	0.8877	0.18735	0.81265	0.3747	0.57703	FALSE	132	88	162	176
ADAP1_29907_CAGGTGCTCGATCTTCATCA	ADAP1	180.7	77.344	-1.2137	5574.7	2114.2	2.2479	0.012248	0.98775	0.024496	0.095084	FALSE	46	46	125	35
ADAP1_29908_GCTTCCAGAGAAAACCCTCA	ADAP1	46.497	180.47	1.9338	9929.5	350.37	7.1572	1	4.1425e-13	8.285e-13	2.7607e-11	TRUE	30	21	14	168
ADAP1_29909_GTGGGCCGGTAGTAGAAGGA	ADAP1	672.09	594.88	-0.17579	2983.8	12259	0.69739	0.24278	0.75722	0.48556	0.67493	FALSE	189	199	447	424
ADAP1_29910_GTTTGTGCTGACAGAACGAG	ADAP1	105.67	235.85	1.1508	8804.8	1036.2	4.044	0.99997	2.629e-05	5.258e-05	0.00064023	TRUE	46	18	54	229
ADAP2_43431_CCTCCTGAAGTACTTCACAA	ADAP2	124.7	190.97	0.61095	2221	1290.7	1.8447	0.96745	0.032546	0.065092	0.18651	TRUE	30	32	88	168
ADAP2_43432_CTGGGACGACAGTATTGTGG	ADAP2	452.29	213.89	-1.0768	29390	7205	2.8086	0.0024879	0.99751	0.0049759	0.029163	FALSE	130	92	298	132
ADAP2_43433_TGATGTCAGGGAAGTTACGG	ADAP2	252.56	176.65	-0.51331	2904.3	3304.3	1.3206	0.093306	0.90669	0.18661	0.37477	FALSE	44	24	195	161
ADAP2_43434_TGTTTGTGTATCATGAAAGT	ADAP2	61.291	104.08	0.75438	931.24	504.13	1.9057	0.97157	0.028435	0.056869	0.17064	TRUE	13	19	45	90
ADAR_265_AGGCAATCAACACCTCTCTG	ADAR	99.334	204.34	1.0332	5688.3	954.59	3.3986	0.99966	0.00033884	0.00067768	0.0058687	TRUE	55	40	39	174
ADAR_266_CGTTCTCCCCAATCAAGACA	ADAR	152.17	153.73	0.014625	1.2179	1681.8	0.038056	0.51513	0.48487	0.96974	0.98547	TRUE	23	27	121	134
ADAR_267_GTGCATACACTCAAGCAGTG	ADAR	237.77	324.65	0.44772	3797.2	3048.4	1.5736	0.94221	0.057787	0.11557	0.27364	TRUE	102	123	123	217
ADAR_268_TTCTTGTAGGGTGAACACCG	ADAR	170.14	268.32	0.65415	4881.5	1951.1	2.2227	0.98688	0.01312	0.026239	0.099813	TRUE	62	95	99	186
ADARB1_269_GGTGAATACATGAGTGATCG	ADARB1	444.89	368.58	-0.27082	2918.4	7047.5	0.90906	0.18166	0.81834	0.36332	0.56648	FALSE	74	90	347	296
ADARB1_270_TCAGGTCACCAAACTTACCC	ADARB1	232.48	268.32	0.20597	642.75	2958.3	0.65877	0.74498	0.25502	0.51005	0.69491	TRUE	82	82	138	199
ADARB1_271_TTCAGAAATCAGAGCGAGGG	ADARB1	730.21	1082.8	0.56775	62762	13704	3.012	0.9987	0.0012976	0.0025951	0.017432	TRUE	260	273	431	861
ADARB1_272_TTGGAGCCCACGTAAAAGGG	ADARB1	1221.6	583.42	-1.0649	210430	27385	3.8564	5.7527e-05	0.99994	0.00011505	0.0012772	FALSE	175	175	981	436
ADARB2_273_CAGAGCGATCGATATTCGTG	ADARB2	239.88	284.55	0.24541	999.36	3084.6	0.80423	0.78937	0.21063	0.42127	0.61854	TRUE	87	101	140	197
ADARB2_274_GGCGTTGGGGAACTGCACGA	ADARB2	300.12	320.83	0.09599	214.64	4160.8	0.32116	0.62596	0.37404	0.74809	0.86205	TRUE	123	107	161	229
ADARB2_275_GTGGACGGCAGGACGTTCGA	ADARB2	773.54	655.03	-0.23957	7033.9	14808	0.97386	0.16506	0.83494	0.33013	0.53487	FALSE	189	205	543	481
ADARB2_276_TCCTGGCATCACAAACACGG	ADARB2	163.8	133.68	-0.29114	454.64	1854.9	0.69924	0.24215	0.75785	0.48429	0.67393	FALSE	66	87	89	53
ADAT1_33087_ATGCTGAGGTCATAGCCAGA	ADAT1	485.05	622.57	0.35945	9492.7	7913.1	1.5459	0.93894	0.061059	0.12212	0.28402	TRUE	201	160	258	492
ADAT1_33088_CTATCACTTTGGCACTACCA	ADAT1	402.62	327.52	-0.29703	2827.8	6165.2	0.95651	0.16941	0.83059	0.33881	0.54318	FALSE	122	86	259	257
ADAT1_33089_GCATCCGAGGACGTTCCATC	ADAT1	101.45	216.75	1.0878	6881.2	981.6	3.6803	0.99988	0.00011656	0.00023312	0.0023614	TRUE	44	45	52	182
ADAT1_33090_GTGGACATTATTGGCAGCGG	ADAT1	176.48	92.621	-0.92272	3605.5	2048.6	1.8527	0.031915	0.96809	0.06383	0.18422	FALSE	29	35	138	62
ADAT2_60293_CACTTTGACGACACCAATCG	ADAT2	880.27	561.46	-0.64784	51458	17618	2.4019	0.0081551	0.99184	0.01631	0.07098	FALSE	235	191	598	397
ADAT2_60294_GCAGCTGCACACATAATGCA	ADAT2	25.362	581.51	4.4658	220780	158.36	44.194	1	0	0	0	TRUE	13	82	11	527
ADAT2_60295_GGAGACCGAAAAGTGGATGG	ADAT2	374.09	369.53	-0.017639	10.388	5587.3	0.06098	0.47569	0.52431	0.95137	0.97692	FALSE	115	108	239	279
ADAT2_60296_TGACAGCCATATACAACCAG	ADAT2	75.029	295.05	1.9612	26830	658.43	8.5745	1	4.9825e-18	9.9649e-18	4.7285e-16	TRUE	21	68	50	241
ADAT3_56949_CCCACACCGCCCGCTCCATG	ADAT3	463.91	465.02	0.0034225	0.60966	7454.3	0.01279	0.5051	0.4949	0.9898	0.99512	TRUE	151	169	288	318
ADAT3_56950_CGAGGCCGGGTCCACTACCA	ADAT3	362.46	249.22	-0.53863	6468.2	5356.1	1.5474	0.060884	0.93912	0.12177	0.28346	FALSE	102	85	241	176
ADAT3_56951_GCTTCTCGGACAGGACAGGG	ADAT3	88.767	118.4	0.41158	441.4	822.45	1.0334	0.84914	0.15086	0.30172	0.50623	TRUE	23	33	61	91
ADAT3_56952_TTGTCCTCGTGGAAGGACGT	ADAT3	623.48	777.26	0.31759	11859	11083	1.4607	0.92795	0.072052	0.1441	0.31742	TRUE	198	214	392	600
ADCK1_45107_GAGTGTCCCTTATGGCTCAG	ADCK1	358.24	182.38	-0.97012	15895	5272.6	2.4219	0.0077199	0.99228	0.01544	0.068184	FALSE	76	57	263	134
ADCK1_45108_GCTTCGATGACACCCCTCTG	ADCK1	228.26	194.79	-0.22765	560.87	2886.8	0.62288	0.26668	0.73332	0.53335	0.71274	FALSE	91	91	125	113
ADCK1_45109_GGTGCGGAAGCACCCCGGCA	ADCK1	97.221	80.208	-0.2744	145.05	927.77	0.55854	0.28774	0.71226	0.57547	0.7432	FALSE	52	62	40	22
ADCK1_45110_TTTCAGATCTCACGCCACCT	ADCK1	358.24	377.17	0.074095	179.24	5272.6	0.26072	0.60285	0.39715	0.79431	0.89078	TRUE	106	99	233	296
ADCK2_55683_CCTCCGAAAACAGATCGCGC	ADCK2	365.63	428.73	0.22909	1993.8	5418.9	0.85715	0.80432	0.19568	0.39136	0.59247	TRUE	89	84	257	365
ADCK2_55684_CCTGGTTGGATCAAATGCAG	ADCK2	356.12	386.72	0.11858	468.2	5231	0.423	0.66385	0.33615	0.67229	0.81248	TRUE	123	121	214	284
ADCK2_55685_GGCGTATGCTTTGTACACCT	ADCK2	455.46	444.01	-0.036647	65.539	7272.8	0.13425	0.4466	0.5534	0.89321	0.94734	FALSE	172	140	259	325
ADCK2_55686_TTCGCCGACTCAGAACGTCA	ADCK2	666.81	278.82	-1.2549	78732	12130	3.5229	0.00021344	0.99979	0.00042689	0.0039586	FALSE	146	125	485	167
ADCK3_44811_CCGAATGAAGGGCGGCCGCG	ADCK3	261.02	220.57	-0.24188	819.31	3452.8	0.68829	0.24563	0.75437	0.49126	0.67997	FALSE	68	55	179	176
ADCK3_44812_CCTGGCTAAGATCTTCGAGC	ADCK3	231.43	314.15	0.43925	3441.3	2940.4	1.5255	0.93643	0.063568	0.12714	0.29217	TRUE	90	101	129	228
ADCK3_44813_CCTGGGTCATGCCCACAGCG	ADCK3	224.03	193.84	-0.20786	456.44	2815.7	0.56903	0.28466	0.71534	0.56932	0.7406	FALSE	67	63	145	140
ADCK3_44814_TGTCCGAGGCCAATGCAGAG	ADCK3	228.26	433.51	0.92241	21596	2886.8	3.8201	0.99993	6.67e-05	0.0001334	0.0014515	TRUE	72	123	144	331
ADCK4_50403_GCACCTTGCGTTCTCGAGAG	ADCK4	272.64	120.31	-1.1736	12074	3659.7	2.518	0.0058978	0.9941	0.011796	0.055944	FALSE	22	65	236	61
ADCK4_50404_GGAGTGTGACTACCGTCGTG	ADCK4	530.49	500.35	-0.084228	454.34	8923	0.31908	0.37483	0.62517	0.74966	0.86302	FALSE	235	201	267	323
ADCK4_50405_TAAGGTCTGCACAATCCGCT	ADCK4	140.55	209.11	0.56989	2373.7	1513.2	1.7627	0.96101	0.038985	0.07797	0.21086	TRUE	58	69	75	150
ADCK4_50406_TTAAGGAGCTGTGCACGACA	ADCK4	402.62	347.57	-0.21156	1517.4	6165.2	0.70113	0.24161	0.75839	0.48322	0.67324	FALSE	119	172	262	192
ADCK5_65021_CACCCCTCGAAGGACAACAT	ADCK5	1044.1	632.12	-0.72305	86173	22166	2.767	0.0028291	0.99717	0.0056582	0.032148	FALSE	201	209	787	453
ADCK5_65022_CGCGGGGCACCACGACGTAG	ADCK5	1270.2	779.17	-0.70435	122340	28863	2.8903	0.0019241	0.99808	0.0038482	0.023871	FALSE	247	275	955	541
ADCK5_65023_GTGCCTCTGCCATGACATAG	ADCK5	926.77	901.39	-0.040017	322.1	18881	0.18471	0.42673	0.57327	0.85346	0.92589	FALSE	334	322	543	622
ADCK5_65024_TGCCAGGATGTGGGTCCGAG	ADCK5	487.16	405.82	-0.26298	3315.4	7959.4	0.91179	0.18094	0.81906	0.36188	0.56515	FALSE	89	67	372	358
ADCY1_277_AACCGGGTTACGGACATGAG	ADCY1	406.85	433.51	0.091345	355.42	6252	0.33715	0.632	0.368	0.73601	0.85393	TRUE	121	128	264	326
ADCY1_278_CATGTTCAGATCCACCTCGG	ADCY1	254.68	522.31	1.0333	36943	3341.2	4.63	1	1.828e-06	3.656e-06	5.6704e-05	TRUE	87	164	154	383
ADCY1_279_CCCAGACGAAAGGACCACCA	ADCY1	679.49	518.49	-0.38948	13020	12440	1.4435	0.074443	0.92556	0.14889	0.32419	FALSE	204	262	439	281
ADCY1_280_CGGGGTGGTGTAGACAACGT	ADCY1	267.36	342.79	0.35739	2856.3	3565.3	1.2634	0.89678	0.10322	0.20645	0.3997	TRUE	64	82	189	277
ADCY10_43455_AATGCTTACCTATCTTGACT	ADCY10	476.59	418.23	-0.18805	1705	7728.8	0.66389	0.25338	0.74662	0.50676	0.69229	FALSE	131	114	320	324
ADCY10_43456_AGAAAACAGCCTACGAGCTG	ADCY10	663.64	880.38	0.4072	23606	12052	1.9743	0.97583	0.024174	0.048348	0.15283	TRUE	294	375	334	547
ADCY10_43457_GCACAGGGAATGTTAACGAA	ADCY10	413.19	474.57	0.19936	1885.8	6382.9	0.76824	0.77883	0.22117	0.44235	0.63805	TRUE	171	193	220	304
ADCY10_43458_TCACAAACACAATCGTCACT	ADCY10	591.78	630.21	0.09062	738.55	10333	0.37804	0.6473	0.3527	0.7054	0.83442	TRUE	128	129	432	531
ADCY2_281_ACTCCAAGTACCGGGTCATG	ADCY2	451.23	346.61	-0.37957	5496.1	7182.5	1.2344	0.10852	0.89148	0.21704	0.41234	FALSE	111	109	316	254
ADCY2_282_CAGGCAGACGCTAAGCACGA	ADCY2	349.78	484.11	0.46774	9081.6	5106.8	1.8798	0.96993	0.030071	0.060142	0.17716	TRUE	157	133	174	374
ADCY2_283_CCTGTAATTGCATCAAGTCG	ADCY2	309.63	444.01	0.51865	9102.2	4338.1	2.0403	0.97934	0.02066	0.04132	0.13726	TRUE	115	139	178	326
ADCY2_284_TGAAGCGGCATACAAACGTG	ADCY2	228.26	349.48	0.61236	7429.9	2886.8	2.2562	0.98797	0.01203	0.02406	0.093767	TRUE	37	50	179	316
ADCY3_285_AGCTGTCTCCAGTACTACAC	ADCY3	423.76	384.81	-0.13875	758.9	6602.5	0.47932	0.31586	0.68414	0.63171	0.7844	FALSE	119	134	282	269
ADCY3_286_CCACGGAGATGATCACGATG	ADCY3	617.14	272.13	-1.1783	61939	10932	3.2997	0.00048391	0.99952	0.00096782	0.007886	FALSE	90	69	494	216
ADCY3_287_GTCGATGAGTATCTCGACCA	ADCY3	325.48	240.62	-0.43422	3620.5	4637.6	1.246	0.10638	0.89362	0.21276	0.4073	FALSE	104	90	204	162
ADCY3_288_TCTCTTCTAGGTAATCACAG	ADCY3	1.0567	0	-1.0404	0	2.8043	0.63105	0.28769	0.71231	0.57538	0.7431	FALSE	0	0	0	0
ADCY4_64469_GGAGAGGTTGGAAATCATGG	ADCY4	110.96	65.885	-0.7432	1032.8	1105.5	1.3556	0.087221	0.91278	0.17444	0.35839	FALSE	34	20	71	49
ADCY4_64470_GTGGCCCAAGATACAGCCCG	ADCY4	100.39	77.344	-0.37204	266.72	968.07	0.74074	0.22894	0.77106	0.45788	0.65225	FALSE	3	19	92	62
ADCY4_64471_TGGAGGCAGGCGGTGTACCA	ADCY4	100.39	117.45	0.22432	145.69	968.07	0.5482	0.70804	0.29196	0.58392	0.74966	TRUE	36	26	59	97
ADCY4_64472_TTCATCATCTAGTCCCCGGG	ADCY4	416.36	543.32	0.38315	8094.5	6448.6	1.581	0.94306	0.056943	0.11389	0.27107	TRUE	99	70	295	499
ADCY5_289_AGCCGCTCCAGTTTGTCCGA	ADCY5	234.6	177.6	-0.39956	1632	2994.3	1.0416	0.1488	0.8512	0.2976	0.50221	FALSE	90	64	132	122
ADCY5_290_AGCTACACTCACCTTTACGC	ADCY5	349.78	247.31	-0.49845	5289.8	5106.8	1.434	0.075788	0.92421	0.15158	0.3278	FALSE	60	49	271	210
ADCY5_291_CACAGCGGGCGAGTACACTG	ADCY5	194.44	148.96	-0.38218	1038.9	2331	0.94207	0.17305	0.82695	0.34611	0.5503	FALSE	62	52	122	104
ADCY5_292_GACGACGATCCTCCGCTGAG	ADCY5	369.86	420.14	0.18341	1265.1	5502.9	0.67775	0.75103	0.24897	0.49793	0.68514	TRUE	177	199	173	241
ADCY6_293_AACACTGCAGTACCTGAACG	ADCY6	648.84	532.81	-0.28376	6748	11693	1.073	0.14162	0.85838	0.28325	0.48723	FALSE	170	153	444	405
ADCY6_294_ATAGATCCCAAGCATCAGGG	ADCY6	192.33	350.43	0.8622	12775	2297.3	3.2987	0.99951	0.00048573	0.00097147	0.0079108	TRUE	75	49	107	318
ADCY6_295_GATGACGCCTTCATCCGGAG	ADCY6	117.3	91.667	-0.35232	329.76	1190.1	0.74303	0.22847	0.77153	0.45695	0.65131	FALSE	12	22	99	74
ADCY6_296_TTGGCCTGGCAACTTAACCG	ADCY6	201.84	144.18	-0.48245	1673.7	2449.9	1.1648	0.12203	0.87797	0.24405	0.44375	FALSE	50	43	141	108
ADCY7_297_AGAGGCACCAGAATGTCAGG	ADCY7	347.67	275	-0.3372	2649.6	5065.5	1.021	0.15361	0.84639	0.30723	0.51145	FALSE	93	79	236	209
ADCY7_298_CCGTAGCCGGGTGCACATCA	ADCY7	100.39	190.02	0.91377	4116.7	968.07	2.8806	0.99801	0.001986	0.0039719	0.024488	TRUE	40	48	55	151
ADCY7_299_GCGTGGGTAGGCAGCGACAC	ADCY7	61.291	69.705	0.18277	35.429	504.13	0.37471	0.64494	0.35506	0.71012	0.83756	TRUE	15	21	43	52
ADCY7_300_TGTACGTCGAGTGTCTCCTG	ADCY7	407.9	211.98	-0.94105	19698	6273.8	2.4736	0.0066881	0.99331	0.013376	0.061396	FALSE	155	112	231	110
ADCY8_301_ATTTCCAGGACAACAAACCG	ADCY8	189.16	227.26	0.26346	727.28	2247	0.80373	0.78922	0.21078	0.42156	0.61887	TRUE	71	54	108	184
ADCY8_302_CAAAACACGATGTTGACATG	ADCY8	789.39	465.97	-0.75923	53198	15217	2.6218	0.0043732	0.99563	0.0087464	0.044836	FALSE	195	187	552	301
ADCY8_303_CGATATTTAAGATGGCACCC	ADCY8	357.18	263.54	-0.4372	4409.4	5251.8	1.2921	0.098156	0.90184	0.19631	0.38717	FALSE	96	76	242	200
ADCY8_304_GCTGCAGGTCATCCTCCAAG	ADCY8	163.8	219.62	0.42087	1566.4	1854.9	1.2961	0.90252	0.097477	0.19495	0.38525	TRUE	54	43	101	187
ADCY9_305_GATATCGGGTCAGAGAGCCA	ADCY9	381.49	433.51	0.18397	1354.4	5735.7	0.68688	0.75392	0.24608	0.49216	0.68055	TRUE	151	143	210	311
ADCY9_306_GCTACCACGTCACTGCATCG	ADCY9	525.2	350.43	-0.58237	15427	8804	1.8626	0.031257	0.96874	0.062513	0.18174	FALSE	202	183	295	184
ADCY9_307_GGGAGACTGTTACTACTGCG	ADCY9	815.81	601.56	-0.43889	23084	15906	1.6988	0.044679	0.95532	0.089357	0.23091	FALSE	172	163	600	467
ADCY9_308_TGTACGCCCGGCATTACGCG	ADCY9	543.17	512.76	-0.08296	462.45	9210.3	0.31686	0.37568	0.62432	0.75135	0.864	FALSE	110	149	404	388
ADCYAP1_309_AGAGGAAGAGGCGTACGGCG	ADCYAP1	78.199	148	0.91178	2497.1	695.46	2.6469	0.99593	0.0040674	0.0081349	0.042379	TRUE	65	67	9	88
ADCYAP1_310_GAAGCACCTGCAGTCGCTCG	ADCYAP1	397.34	367.62	-0.11185	441.7	6057.1	0.38183	0.3513	0.6487	0.70259	0.83256	FALSE	134	103	242	282
ADCYAP1_311_GCTGCCAGACTTCGATGGCT	ADCYAP1	154.29	148	-0.059577	19.734	1713	0.15178	0.43963	0.56037	0.87925	0.93947	FALSE	56	61	90	94
ADCYAP1_312_GGCCTCGTTAAGGATCCCGT	ADCYAP1	78.199	105.03	0.42097	362.01	695.46	1.0176	0.84533	0.15467	0.30935	0.51374	TRUE	35	44	39	66
ADCYAP1R1_313_CGAATCTTCAACCCAGACCA	ADCYAP1R1	420.59	413.45	-0.024613	25.43	6536.5	0.088209	0.46486	0.53514	0.92971	0.96691	FALSE	76	86	322	347
ADCYAP1R1_314_GGTGAGCCGGAACTGCACGG	ADCYAP1R1	326.54	420.14	0.36264	4398.1	4657.8	1.3715	0.91489	0.085108	0.17022	0.35292	TRUE	114	103	195	337
ADCYAP1R1_315_TGAATATGAATCTGAGACTG	ADCYAP1R1	367.75	340.88	-0.10913	360.95	5460.8	0.36352	0.35811	0.64189	0.71621	0.84149	FALSE	144	95	204	262
ADCYAP1R1_316_TGTGGGACAACATCACGTGT	ADCYAP1R1	796.79	594.88	-0.42099	20492	15409	1.6266	0.051915	0.94809	0.10383	0.25524	FALSE	170	163	584	460
ADD1_317_ATTATCGAGCATCCGCATGA	ADD1	828.49	528.04	-0.64886	45703	16239	2.3578	0.009193	0.99081	0.018386	0.077309	FALSE	138	121	646	432
ADD1_318_CCTCTTGCCAATCTCCCCGG	ADD1	660.47	647.39	-0.028798	85.45	11975	0.11946	0.45245	0.54755	0.90491	0.95426	FALSE	143	147	482	531
ADD1_319_GACTAGCAGATCTCTTTGGG	ADD1	382.54	426.82	0.15762	981.07	5757	0.58359	0.72025	0.27975	0.5595	0.73251	TRUE	122	172	240	275
ADD1_320_GTAATGCCAATAGGCCTGTG	ADD1	616.08	856.51	0.47468	29097	10907	2.3021	0.98934	0.010664	0.021328	0.085844	TRUE	303	285	280	612
ADD2_321_ACTCGGCCATCTATGCAGCG	ADD2	734.44	587.24	-0.32221	10868	13811	1.2526	0.10518	0.89482	0.21036	0.40447	FALSE	196	191	499	424
ADD2_322_GCTGAGTGACACCTATGTCA	ADD2	591.78	320.83	-0.88118	37552	10333	2.6654	0.0038445	0.99616	0.0076891	0.040532	FALSE	116	91	444	245
ADD2_323_GGAGAAGCACCGGCCCCATG	ADD2	513.58	474.57	-0.11375	761.36	8543.6	0.42209	0.33648	0.66352	0.67296	0.81302	FALSE	142	120	344	377
ADD2_324_GGTGCTAAGAAACCATGGAG	ADD2	225.09	170.92	-0.39514	1474	2833.4	1.0176	0.15442	0.84558	0.30884	0.51321	FALSE	76	49	137	130
ADD3_325_AAGGATCCCACATTTCATGG	ADD3	197.61	335.16	0.75918	9622.1	2381.8	2.8183	0.99759	0.0024139	0.0048278	0.028453	TRUE	70	77	117	274
ADD3_326_ACCCAGAATACATTAGGGAG	ADD3	169.08	387.67	1.1923	24890	1935	4.9693	1	3.3599e-07	6.7198e-07	1.1949e-05	TRUE	53	107	107	299
ADD3_327_CTAGGCTTCTCTCGAATGAG	ADD3	943.68	295.05	-1.674	227170	19346	4.6633	1.5559e-06	1	3.1117e-06	4.8968e-05	FALSE	93	80	800	229
ADD3_328_GTCTACAAGTCTGTACAGGC	ADD3	203.95	251.13	0.29887	1115.8	2484.2	0.94651	0.82805	0.17195	0.3439	0.54815	TRUE	77	51	116	212
ADGB_49831_AAAAGCGACAAAGTTCCAAA	ADGB	64.462	42.969	-0.57417	233.32	538.81	0.92593	0.17498	0.82502	0.34996	0.55399	FALSE	47	30	14	15
ADGB_49832_CAACTTATGAATTTGAACTG	ADGB	183.87	136.54	-0.42664	1126.2	2163.7	1.0175	0.15443	0.84557	0.30886	0.51322	FALSE	84	50	90	93
ADGB_49833_GAAGGTAAATCAGATCCTGG	ADGB	119.41	124.13	0.055462	11.137	1218.6	0.13519	0.55363	0.44637	0.89274	0.94718	TRUE	26	26	87	104
ADGB_49834_TCAGTGAAATCTATGCAGTG	ADGB	295.89	187.15	-0.65802	5988.7	4082.7	1.7018	0.044396	0.9556	0.088792	0.23008	FALSE	85	93	195	103
ADGRA1_53583_ACCTTCACTGTGTTCGCCGG	ADGRA1	197.61	138.45	-0.51016	1763.5	2381.8	1.2121	0.1127	0.8873	0.22541	0.42193	FALSE	80	77	107	68
ADGRA1_53584_CCCCGCACTTGACGCCAACG	ADGRA1	243.05	196.7	-0.30387	1077.2	3139.2	0.82728	0.20403	0.79597	0.40807	0.60731	FALSE	56	87	174	119
ADGRA1_53585_GGTGCCCAGGAAGTACACAC	ADGRA1	203.95	184.29	-0.14552	193.47	2484.2	0.39454	0.34658	0.65342	0.69316	0.82621	FALSE	76	69	117	124
ADGRA1_53586_TGCACTCAGTACCTGAGCAG	ADGRA1	519.92	500.35	-0.055254	191.58	8685.4	0.21003	0.41682	0.58318	0.83365	0.91362	FALSE	151	111	341	413
ADGRA2_34199_AGGGATGAGAATAGACTCGG	ADGRA2	163.8	117.45	-0.47643	1081.5	1854.9	1.0761	0.14087	0.85913	0.28174	0.48569	FALSE	33	34	122	89
ADGRA2_34200_GAGCTGACGCTGTCTCACAT	ADGRA2	276.87	296.96	0.10073	201.93	3735.7	0.32875	0.62883	0.37117	0.74235	0.85811	TRUE	48	40	214	271
ADGRA2_34201_GCCACGTTCCTCGCATTCTG	ADGRA2	397.34	438.28	0.14115	838.68	6057.1	0.52608	0.70058	0.29942	0.59883	0.76048	TRUE	91	84	285	375
ADGRA2_34202_TGAGCAATAACAAGATCACG	ADGRA2	180.7	105.99	-0.76412	2840.1	2114.2	1.6249	0.052048	0.94795	0.1041	0.25565	FALSE	51	43	120	68
ADGRA3_63893_ATCTGAACTATACACCCAGG	ADGRA3	142.66	215.8	0.59368	2702.9	1543.5	1.8616	0.96867	0.031335	0.06267	0.18204	TRUE	34	58	101	168
ADGRA3_63894_CACTCCTACCCATAGTACTG	ADGRA3	363.52	434.46	0.25654	2521.2	5377	0.96743	0.83334	0.16666	0.33333	0.53785	TRUE	65	58	279	397
ADGRA3_63895_TGATGGAAAACGACGTACTG	ADGRA3	345.56	274.04	-0.33342	2565.5	5024.3	1.0089	0.15652	0.84348	0.31303	0.51756	FALSE	59	62	268	225
ADGRA3_63896_TTCAGCGCATTGCTACCTAC	ADGRA3	145.83	268.32	0.87514	7672.7	1589.3	3.0724	0.99894	0.0010618	0.0021236	0.014829	TRUE	48	38	90	243
ADGRB1_1569_CAGGATGAGTACCGGCAGTG	ADGRB1	997.57	768.66	-0.37564	26310	20848	1.5854	0.05644	0.94356	0.11288	0.26943	FALSE	245	247	699	558
ADGRB1_1570_CCCACGATGAGCGTCACCGA	ADGRB1	742.89	871.79	0.23053	8320	14025	1.0884	0.86179	0.13821	0.27642	0.47976	TRUE	196	227	507	686
ADGRB1_1571_CCTGTGGGGCGAATGCACGC	ADGRB1	561.13	472.66	-0.24707	3921.3	9621.4	0.90202	0.18352	0.81648	0.36705	0.56992	FALSE	183	162	348	333
ADGRB1_1572_GAAGCATCCGTGTTTGTGGT	ADGRB1	1069.4	682.72	-0.6467	75703	22894	2.5558	0.0052977	0.9947	0.010595	0.051695	FALSE	264	228	748	487
ADGRB2_1573_ATCATCAGCCGAGGGCACGT	ADGRB2	413.19	375.26	-0.13856	719.71	6382.9	0.47474	0.31748	0.68252	0.63497	0.78673	FALSE	86	137	305	256
ADGRB2_1574_CAGCCACTGATAGCAAGTGG	ADGRB2	671.04	773.44	0.20461	5249.6	12233	0.92585	0.82274	0.17726	0.35452	0.5582	TRUE	151	130	484	680
ADGRB2_1575_CTCTCTCGTAGGCGACCCGG	ADGRB2	286.38	441.15	0.62157	12115	3908.2	2.4756	0.99335	0.0066499	0.0133	0.061106	TRUE	114	150	157	312
ADGRB2_1576_TGAGCAAGACCTCGACAAAG	ADGRB2	231.43	207.2	-0.15878	293.61	2940.4	0.44671	0.32753	0.67247	0.65507	0.80083	FALSE	85	98	134	119
ADGRB3_1577_AGGCGAATAAGGACCTGTCA	ADGRB3	505.13	347.57	-0.53805	12520	8355.5	1.7237	0.042385	0.95762	0.08477	0.22308	FALSE	139	131	339	233
ADGRB3_1578_AGGGTCAATAGAGTTAATGC	ADGRB3	82.426	67.795	-0.2782	107.29	745.61	0.53583	0.29514	0.70486	0.59029	0.75377	FALSE	13	20	65	51
ADGRB3_1579_CCAAGTCTGCAATCTTACCA	ADGRB3	368.81	483.16	0.38872	6568.1	5481.9	1.5445	0.93877	0.061234	0.12247	0.28456	TRUE	64	88	285	418
ADGRB3_1580_TACAGTACACGGAGTATGGG	ADGRB3	526.26	614.93	0.22425	3937	8827.7	0.94373	0.82735	0.17265	0.34531	0.54938	TRUE	146	194	352	450
ADGRD1_67341_AAAAGAAAACGTGACCCCTG	ADGRD1	358.24	228.21	-0.64826	8559.8	5272.6	1.7907	0.036672	0.96333	0.073344	0.20239	FALSE	85	72	254	167
ADGRD1_67342_CCTGCTCAGACCCTATCACG	ADGRD1	73.972	266.41	1.8346	20290	646.2	7.57	1	1.8696e-14	3.7391e-14	1.3753e-12	TRUE	54	32	16	247
ADGRD1_67343_GAAGGGGTCTGGTCGAACCA	ADGRD1	269.47	237.76	-0.17991	503.28	3603	0.52829	0.29865	0.70135	0.59729	0.75935	FALSE	107	106	148	143
ADGRD1_67344_TCTCTTCCCAAGGATCGCGG	ADGRD1	73.972	0	-6.2283	5097.8	646.2	2.9099	0.0002299	0.99977	0.0004598	0.0042204	FALSE	1	0	69	0
ADGRE1_5557_CACGTGGACTAAATTCACCA	ADGRE1	258.9	85.937	-1.5799	16039	3415.5	2.9596	0.0015355	0.99846	0.003071	0.019953	FALSE	27	10	218	80
ADGRE1_5558_CCAGGATTTGAATCCAGCAG	ADGRE1	259.96	258.77	-0.0066109	0.71171	3434.1	0.020359	0.49188	0.50812	0.98375	0.99208	FALSE	61	59	185	212
ADGRE1_5559_CCTGCAAAAACCTGTCAGGG	ADGRE1	161.68	326.56	1.0097	14004	1823.1	3.8615	0.99994	5.6349e-05	0.0001127	0.0012535	TRUE	40	63	113	279
ADGRE1_5560_TGCCACCTGCACCAATACAG	ADGRE1	169.08	115.54	-0.54541	1446.2	1935	1.2172	0.11172	0.88828	0.22343	0.41961	FALSE	28	35	132	86
ADGRE2_37087_ACCGTCACAAGTCTCCATGG	ADGRE2	125.75	256.86	1.0246	8862.1	1305.3	3.6288	0.99986	0.0001424	0.0002848	0.0028042	TRUE	26	36	93	233
ADGRE2_37088_AGACAAGGCCCACCACAGAA	ADGRE2	213.46	453.56	1.0837	29822	2639.9	4.6729	1	1.4846e-06	2.9692e-06	4.6925e-05	TRUE	104	77	98	398
ADGRE2_37089_GCACATCGTAGTGGGCCATG	ADGRE2	665.75	622.57	-0.096601	932.64	12104	0.39251	0.34734	0.65266	0.69468	0.82727	FALSE	128	135	502	517
ADGRE2_37090_TCCACCAGCACTCACACGGT	ADGRE2	426.93	477.43	0.16095	1276.3	6668.8	0.61844	0.73186	0.26814	0.53629	0.71497	TRUE	95	130	309	370
ADGRE3_53951_ATCATCCAGGGAGACACACA	ADGRE3	488.22	255.9	-0.92926	27676	7982.6	2.6002	0.0046585	0.99534	0.009317	0.046982	FALSE	96	113	366	155
ADGRE3_53952_CACCTCCTCAAAGACAACCG	ADGRE3	95.107	95.486	0.0056726	0.071682	901.14	0.012613	0.50465	0.49535	0.9907	0.99562	TRUE	39	49	51	51
ADGRE3_53953_CAGGTGACTGCAATTACACA	ADGRE3	295.89	117.45	-1.3257	16740	4082.7	2.7927	0.0026117	0.99739	0.0052234	0.030234	FALSE	41	70	239	53
ADGRE3_53954_GATTGATCGAACTGAACCCA	ADGRE3	206.07	234.9	0.18806	416.02	2518.6	0.57446	0.71717	0.28283	0.56567	0.7379	TRUE	53	31	142	215
ADGRE5_2765_ACCGTCACAAGTCTCCGTCG	ADGRE5	120.47	95.486	-0.3322	313.13	1233	0.7115	0.23816	0.76184	0.47632	0.66726	FALSE	44	33	70	67
ADGRE5_2766_CCCATCGGAGGACTCAAGGT	ADGRE5	106.73	147.05	0.45863	817.91	1050	1.2442	0.89324	0.10676	0.21352	0.40818	TRUE	26	31	75	123
ADGRE5_2767_CCTTATGGCTCATTATGACG	ADGRE5	63.405	89.757	0.49484	349.81	527.19	1.1477	0.87409	0.12591	0.25182	0.45249	TRUE	36	19	24	75
ADGRE5_2768_GGCCTCACCTGTGTTCGAAG	ADGRE5	143.72	273.09	0.92141	8580.3	1558.7	3.2768	0.99948	0.00052495	0.0010499	0.0084342	TRUE	70	74	66	212
ADGRF1_67089_AAAGACAATGTCATTACACT	ADGRF1	145.83	114.58	-0.34523	489.99	1589.3	0.78383	0.21647	0.78353	0.43294	0.62928	FALSE	33	25	105	95
ADGRF1_67090_AATACATCTATTCCCATCAG	ADGRF1	249.39	245.4	-0.023196	7.9746	3249	0.070064	0.47207	0.52793	0.94414	0.97343	FALSE	56	51	180	206
ADGRF1_67091_CAACGGGGAAGATTGTAGAG	ADGRF1	208.18	430.64	1.0451	25544	2553.1	4.4027	0.99999	5.3449e-06	1.069e-05	0.00015134	TRUE	101	114	96	337
ADGRF1_67092_TTCTGGGGATCAAGGCATGA	ADGRF1	437.49	334.2	-0.38753	5358.8	6890.9	1.2443	0.10669	0.89331	0.21338	0.40802	FALSE	137	148	277	202
ADGRF2_66025_AATTACACAAGACAGATCTG	ADGRF2	546.34	317.97	-0.77902	26548	9282.5	2.3703	0.0088864	0.99111	0.017773	0.07554	FALSE	104	94	413	239
ADGRF2_66026_AGCAAGCTGTTTGCAAATGT	ADGRF2	545.28	331.34	-0.717	23238	9258.4	2.2235	0.013091	0.98691	0.026183	0.099633	FALSE	146	149	370	198
ADGRF2_66027_CAGACACTCAGGGAAATATG	ADGRF2	330.76	308.42	-0.10058	249.67	4738.6	0.32457	0.37275	0.62725	0.74551	0.86028	FALSE	101	127	212	196
ADGRF2_66028_GGACCTCAATGGACAAGCAA	ADGRF2	507.24	437.33	-0.2135	2447.3	8402.4	0.76271	0.22282	0.77718	0.44564	0.64109	FALSE	157	187	323	271
ADGRF3_63809_AGAGTGTAATGTCAACCACA	ADGRF3	415.3	209.11	-0.98646	21870	6426.7	2.572	0.0050556	0.99494	0.010111	0.049951	FALSE	203	132	190	87
ADGRF3_63810_AGTTCCATTACGGACCAATG	ADGRF3	242	232.03	-0.060407	49.65	3121	0.17836	0.42921	0.57079	0.85843	0.92855	FALSE	61	84	168	159
ADGRF3_63811_CACAAACCTGGCCTACACCG	ADGRF3	250.45	224.39	-0.15783	339.75	3267.4	0.45586	0.32424	0.67576	0.64848	0.79599	FALSE	91	89	146	146
ADGRF3_63812_GCTGAGCACCATGAAATACG	ADGRF3	294.83	214.84	-0.4548	3219.1	4063.2	1.2549	0.10476	0.89524	0.20952	0.40359	FALSE	76	46	203	179
ADGRF4_65769_AAATGGTCTGGTGCTATCAG	ADGRF4	352.95	281.68	-0.32437	2547.8	5168.8	0.99132	0.16076	0.83924	0.32153	0.52612	FALSE	85	79	249	216
ADGRF4_65770_GGAAAAAGACATCACCACAC	ADGRF4	116.24	82.118	-0.49626	586.6	1175.9	0.99514	0.15954	0.84046	0.31908	0.52368	FALSE	18	35	92	51
ADGRF4_65771_TGACTGCAACAAATCCGAGC	ADGRF4	105.67	172.83	0.70445	2288.6	1036.2	2.0862	0.98151	0.01849	0.03698	0.12709	TRUE	24	59	76	122
ADGRF4_65772_TGATGCAGGCATAATCAAAG	ADGRF4	45.44	76.389	0.73675	486.87	339.94	1.6786	0.95306	0.04694	0.093881	0.23841	TRUE	11	15	32	65
ADGRF5_65773_AGTCATGTTGTTGAAAAGTG	ADGRF5	661.52	562.41	-0.23378	4919.7	12001	0.90474	0.1828	0.8172	0.3656	0.56867	FALSE	224	174	402	415
ADGRF5_65774_CATCAAGTGCTGCATAGAGG	ADGRF5	489.27	372.4	-0.39289	6862.1	8005.7	1.3063	0.095729	0.90427	0.19146	0.3808	FALSE	98	118	365	272
ADGRF5_65775_CTTGTAGGACCTATAGAGGG	ADGRF5	379.37	419.18	0.14361	792.94	5693.2	0.52762	0.70112	0.29888	0.59776	0.75968	TRUE	139	137	220	302
ADGRF5_65776_TCCATCAAGATACCTCCTCG	ADGRF5	456.52	567.19	0.31255	6142.1	7295.4	1.2957	0.90246	0.097537	0.19507	0.38541	TRUE	131	129	301	465
ADGRG1_24405_AGGACCCCATACCTGGAACA	ADGRG1	117.3	153.73	0.38734	666.72	1190.1	1.0561	0.85449	0.14551	0.29101	0.49542	TRUE	38	44	73	117
ADGRG1_24406_CCCCTGCATACTCACATGTG	ADGRG1	522.03	722.83	0.46874	20292	8732.8	2.1487	0.98417	0.015829	0.031657	0.11423	TRUE	218	195	276	562
ADGRG1_24407_GAGCTCGCACATGTCCACCG	ADGRG1	361.41	581.51	0.68467	24561	5335.2	3.0133	0.99871	0.0012919	0.0025838	0.017369	TRUE	58	102	284	507
ADGRG1_24408_GGAGGACCGGATCAACGCCA	ADGRG1	83.483	89.757	0.10334	19.686	758.29	0.22783	0.58961	0.41039	0.82078	0.90635	TRUE	32	47	47	47
ADGRG2_27165_AACCCTGCAAACCCTAAGTG	ADGRG2	467.08	310.33	-0.58832	12413	7522.7	1.8073	0.035358	0.96464	0.070716	0.19742	FALSE	137	125	305	200
ADGRG2_27166_AGAGGAGGCTGGTCAGACAA	ADGRG2	371.98	345.66	-0.10556	346.39	5545	0.3534	0.36189	0.63811	0.72379	0.84625	FALSE	148	137	204	225
ADGRG2_27167_GGTAGTGTTGACATTCGCAG	ADGRG2	258.9	229.17	-0.1753	442.55	3415.5	0.50883	0.30543	0.69457	0.61087	0.76949	FALSE	90	71	155	169
ADGRG2_27168_TGGGAAAGCACAGTGGCCCG	ADGRG2	472.37	496.53	0.071818	291.91	7637	0.27647	0.60891	0.39109	0.78219	0.88299	TRUE	120	139	327	381
ADGRG3_66001_CAGATACTGGCTAAACTACG	ADGRG3	270.53	245.4	-0.1401	315.91	3621.9	0.41754	0.33814	0.66186	0.67628	0.81526	FALSE	99	114	157	143
ADGRG3_66002_GCGTGTGAGGATATGCACCG	ADGRG3	343.44	448.78	0.38497	5573.1	4983.3	1.4922	0.93218	0.067818	0.13564	0.30503	TRUE	127	160	198	310
ADGRG3_66003_GTCTGTGGTTGTAGGTTCCG	ADGRG3	1013.4	909.98	-0.15516	5353.8	21295	0.70885	0.23921	0.76079	0.47842	0.6693	FALSE	245	206	714	747
ADGRG3_66004_TGAGAGAAGACGATCTCCAG	ADGRG3	597.06	728.56	0.28673	8666.9	10457	1.2859	0.90076	0.099241	0.19848	0.39	TRUE	285	264	280	499
ADGRG4_60701_AGATACTAGACCAGTCTGAG	ADGRG4	98.278	110.76	0.17091	78.021	941.15	0.407	0.65776	0.34224	0.68447	0.82078	TRUE	50	51	43	65
ADGRG4_60702_TGACAGACGAATCAGCACAA	ADGRG4	205.01	209.11	0.028466	8.4262	2501.4	0.08208	0.5327	0.4673	0.9346	0.96915	TRUE	44	34	150	185
ADGRG4_60703_TGGGGTTACTGTATCAACTG	ADGRG4	238.83	192.88	-0.30681	1058.4	3066.5	0.82966	0.20336	0.79664	0.40672	0.60599	FALSE	61	51	165	151
ADGRG4_60704_TTTCCAAAGATGGAGTACCC	ADGRG4	313.85	178.56	-0.81023	9331.9	4417.5	2.0356	0.020893	0.97911	0.041786	0.13828	FALSE	78	52	219	135
ADGRG5_65721_CTGGGGCACCCGCTTCAGAG	ADGRG5	352.95	241.58	-0.5451	6257.5	5168.8	1.5491	0.060674	0.93933	0.12135	0.28288	FALSE	70	66	264	187
ADGRG5_65722_GAGAATATGCAGGTGTCCAG	ADGRG5	705.91	550.95	-0.35697	12051	13094	1.3541	0.087849	0.91215	0.1757	0.35985	FALSE	101	138	567	439
ADGRG5_65723_TCTTACGTACATCTCCCTCG	ADGRG5	532.6	588.19	0.14298	1546.2	8970.7	0.58695	0.72138	0.27862	0.55724	0.73085	TRUE	198	224	306	392
ADGRG5_65724_TGGGCACGTGAACAACCTCA	ADGRG5	119.41	214.84	0.842	4650.2	1218.6	2.7337	0.99687	0.0031321	0.0062643	0.03476	TRUE	38	55	75	170
ADGRG6_45283_AACCCATTGGTAACCTACTG	ADGRG6	513.58	316.06	-0.69864	19792	8543.6	2.1369	0.016301	0.9837	0.032602	0.11655	FALSE	69	74	417	257
ADGRG6_45284_CTAACAGAATCGATAAACAA	ADGRG6	35.929	118.4	1.693	3685.3	249.76	5.2186	1	9.1186e-08	1.8237e-07	3.5062e-06	TRUE	14	8	20	116
ADGRG6_45285_TATCTGAATGATATAACCGG	ADGRG6	97.221	85.937	-0.17605	63.719	927.77	0.37044	0.35507	0.64493	0.71014	0.83756	FALSE	49	26	43	64
ADGRG6_45286_TCCTTAAGGACACGGCAACT	ADGRG6	562.19	423.96	-0.4063	9601.5	9645.7	1.4075	0.079642	0.92036	0.15928	0.33849	FALSE	97	104	435	340
ADGRG7_54331_AGACAGTGCACATCCAACGT	ADGRG7	638.28	360.94	-0.8207	39229	11438	2.5932	0.0047538	0.99525	0.0095077	0.047677	FALSE	112	108	492	270
ADGRG7_54332_ATTCCAATAGACACAGGCAT	ADGRG7	825.32	762.93	-0.11326	1946.8	16155	0.49084	0.31177	0.68823	0.62354	0.77844	FALSE	223	251	558	548
ADGRG7_54333_CATCACTAGTGCTACGCGAG	ADGRG7	403.68	497.48	0.30077	4411.6	6186.9	1.1926	0.88348	0.11652	0.23303	0.43111	TRUE	137	115	245	406
ADGRG7_54334_TTTGGGTAATCAATCAGTGG	ADGRG7	254.68	259.72	0.028193	12.729	3341.2	0.087288	0.53478	0.46522	0.93045	0.96716	TRUE	62	94	179	178
ADGRL1_31019_ACGGACGCGCATCAAGAGCG	ADGRL1	841.17	534.72	-0.65263	47553	16574	2.3804	0.0086475	0.99135	0.017295	0.074058	FALSE	195	188	601	372
ADGRL1_31020_AGCCGGCAAGAACTACAACA	ADGRL1	107.79	103.12	-0.063209	10.875	1063.8	0.14298	0.44289	0.55711	0.88577	0.94326	FALSE	43	41	59	67
ADGRL1_31021_CCTTCAAGATCATGTCACAG	ADGRL1	303.29	372.4	0.29527	2394.3	4219.7	1.0639	0.85631	0.14369	0.28739	0.49172	TRUE	96	86	191	304
ADGRL1_31022_TGTTGAAGGCATAGTCCACG	ADGRL1	236.71	168.06	-0.49172	2374	3030.3	1.2472	0.10616	0.89384	0.21231	0.40688	FALSE	53	55	171	121
ADGRL2_32283_AGCTGGACGGAGTTATAACA	ADGRL2	132.09	105.03	-0.32791	367.29	1393.4	0.72488	0.23411	0.76589	0.46821	0.66075	FALSE	60	51	65	59
ADGRL2_32284_CTCTTCGATTTGAAGCAACG	ADGRL2	118.36	125.09	0.079147	22.656	1204.3	0.19395	0.57676	0.42324	0.84649	0.92142	TRUE	34	23	78	108
ADGRL2_32285_GAGCGCTAACTATGGTCGGA	ADGRL2	61.291	45.833	-0.4115	120.1	504.13	0.68847	0.24318	0.75682	0.48636	0.67569	FALSE	35	25	23	23
ADGRL2_32286_TCTTTAACAAAGAAAGAACG	ADGRL2	57.064	38.194	-0.56701	179.81	458.8	0.88097	0.18603	0.81397	0.37205	0.57446	FALSE	46	20	8	20
ADGRL3_32335_ACAGGTTATTGGTCAACACA	ADGRL3	347.67	452.6	0.37957	5529.4	5065.5	1.4744	0.92981	0.070193	0.14039	0.3119	TRUE	103	102	226	372
ADGRL3_32336_AGGCAAATCTGACATAGACC	ADGRL3	251.51	214.84	-0.22633	673.11	3285.8	0.63959	0.26121	0.73879	0.52243	0.704	FALSE	59	45	179	180
ADGRL3_32337_AGGCATCTGGCAGATAACAT	ADGRL3	197.61	201.48	0.027794	7.4634	2381.8	0.079164	0.53154	0.46846	0.93693	0.96999	TRUE	82	77	105	134
ADGRL3_32338_CAAAGTTGTGGTCCGAAGGG	ADGRL3	290.61	285.5	-0.025469	13.019	3985.5	0.080827	0.46779	0.53221	0.93558	0.96957	FALSE	136	109	139	190
ADGRL4_47431_AATGTGTCAGGTGATTACAG	ADGRL4	213.46	157.55	-0.43577	1572	2639.9	1.0882	0.13824	0.86176	0.27648	0.47983	FALSE	54	72	148	93
ADGRL4_47432_ATTTACATTAAGTCATCGAA	ADGRL4	51.781	89.757	0.782	734.52	403.68	1.8901	0.97048	0.029517	0.059034	0.17495	TRUE	42	21	7	73
ADGRL4_47433_TGAAGCCTGCTATTGCAACA	ADGRL4	804.19	755.29	-0.090374	1195.5	15602	0.39142	0.34774	0.65226	0.69548	0.82782	FALSE	227	198	534	593
ADGRL4_47434_TGAATTTGTATCAAACTCTG	ADGRL4	254.68	105.03	-1.2698	11727	3341.2	2.5888	0.0048102	0.99519	0.0096204	0.048111	FALSE	65	44	176	66
ADGRV1_52795_GTTTAACATTGGTAGCCCAG	ADGRV1	173.31	195.75	0.17471	252	1999.7	0.5018	0.69208	0.30792	0.61584	0.7729	TRUE	47	50	117	155
ADGRV1_52796_TCATACCAAATAATCCATAG	ADGRV1	164.85	188.11	0.1893	270.68	1870.9	0.53763	0.70456	0.29544	0.59087	0.75437	TRUE	50	48	106	149
ADGRV1_52797_TCCACATCATCCGATCAAGG	ADGRV1	53.894	42.014	-0.35185	70.843	425.52	0.57593	0.27909	0.72091	0.55819	0.73131	FALSE	13	18	38	26
ADGRV1_52798_TCTTTACTTAAAGGGCGCTG	ADGRV1	227.2	214.84	-0.080319	76.368	2868.9	0.23071	0.40876	0.59124	0.81753	0.90462	FALSE	92	73	123	152
ADH1A_333_ACAGACTTTCTCTAGAGGCG	ADH1A	91.937	94.531	0.039716	3.3646	861.57	0.088375	0.53481	0.46519	0.93039	0.96714	TRUE	42	40	45	59
ADH1A_334_CACACTGAGGAATAGCGAGT	ADH1A	587.55	711.37	0.27546	7683	10234	1.2239	0.88951	0.11049	0.22098	0.41679	TRUE	117	133	439	612
ADH1A_335_CCAGTGTAAGCAATCCTCAG	ADH1A	163.8	255.9	0.64054	4294.1	1854.9	2.1386	0.98376	0.016236	0.032472	0.11621	TRUE	37	50	118	218
ADH1A_336_CCATGGTACCACTAACCACG	ADH1A	101.45	107.9	0.088103	20.815	981.6	0.20591	0.58132	0.41868	0.83736	0.91608	TRUE	25	16	71	97
ADH1B_337_CACCTTCTCCCAGTACACGG	ADH1B	173.31	93.576	-0.88208	3252.6	1999.7	1.783	0.037245	0.96276	0.074489	0.20448	FALSE	65	42	99	56
ADH1B_338_CTGTCACACAGATGACCACG	ADH1B	508.3	378.12	-0.42583	8518.5	8425.9	1.4181	0.07808	0.92192	0.15616	0.33402	FALSE	112	72	369	324
ADH1B_339_GTCTGCAGTTAACGTTGCCA	ADH1B	197.61	338.98	0.77548	10171	2381.8	2.8966	0.99811	0.0018863	0.0037727	0.023472	TRUE	59	70	128	285
ADH1B_340_TGGAGCAGCCAGAATCATTG	ADH1B	457.57	222.48	-1.037	28512	7318.1	2.7481	0.0029969	0.997	0.0059938	0.033594	FALSE	85	111	348	122
ADH1C_341_AGCAGCCAGAATCATTGCTG	ADH1C	288.49	264.5	-0.12483	288.04	3946.8	0.38196	0.35124	0.64876	0.70249	0.83249	FALSE	135	112	138	165
ADH1C_342_CACCTTCTCCCAGTACACAG	ADH1C	120.47	97.396	-0.30392	266.94	1233	0.65711	0.25533	0.74467	0.51066	0.69526	FALSE	52	43	62	59
ADH1C_343_GGTAGAGGTTGCACCTCCTA	ADH1C	236.71	490.8	1.0489	33329	3030.3	4.6157	1	1.959e-06	3.9181e-06	6.0454e-05	TRUE	71	82	153	432
ADH1C_344_TGAAAACATAGGTCACCCCA	ADH1C	374.09	519.44	0.47251	10635	5587.3	1.9446	0.97409	0.025912	0.051823	0.16025	TRUE	173	144	181	400
ADH4_345_AAATTTAGAATCGATAACAG	ADH4	73.972	94.531	0.34961	212.12	646.2	0.80874	0.79029	0.20971	0.41942	0.61703	TRUE	41	12	29	87
ADH4_346_TACATTCTCTCAGTACACTG	ADH4	30.646	63.021	1.0165	540.66	202.79	2.2735	0.98832	0.011683	0.023366	0.091815	TRUE	14	26	15	40
ADH4_347_TCAACCTCTTCAATGCAAAG	ADH4	51.781	89.757	0.782	734.52	403.68	1.8901	0.97048	0.029517	0.059034	0.17495	TRUE	12	34	37	60
ADH4_348_TTCCCACACAAATTTGTGAG	ADH4	181.76	243.49	0.41982	1915.3	2130.7	1.3373	0.90943	0.090566	0.18113	0.3672	TRUE	139	69	33	186
ADH5_349_GCTGGAATTGTGGAAAGTGT	ADH5	221.92	282.64	0.34755	1850.3	2780.3	1.1516	0.87525	0.12475	0.24949	0.44964	TRUE	77	98	133	198
ADH5_350_TCAGGGTATAGGCATCGGTG	ADH5	119.41	85.937	-0.46994	564.06	1218.6	0.95893	0.16854	0.83146	0.33707	0.54143	FALSE	40	45	73	45
ADH5_351_TGCTTCCCGGATCATTGGTG	ADH5	116.24	214.84	0.88049	4973.8	1175.9	2.8754	0.99798	0.0020181	0.0040362	0.024785	TRUE	65	45	45	180
ADH5_352_TGGGTTTACTAAAATCCTGA	ADH5	79.256	49.653	-0.66397	444.1	707.92	1.1126	0.13168	0.86832	0.26335	0.46534	FALSE	26	16	49	36
ADH6_353_AAAACCCAACTGATGTCTGA	ADH6	266.3	348.52	0.38693	3395.6	3546.5	1.3807	0.91631	0.083687	0.16737	0.34898	TRUE	78	92	174	273
ADH6_354_CCTTCATGGCCCAAGATGGT	ADH6	1294.5	948.18	-0.44878	60338	29610	2.0127	0.022071	0.97793	0.044143	0.14345	FALSE	275	302	950	691
ADH6_355_TAAGCACAGTGAAACCAGGT	ADH6	596.01	870.83	0.5463	38102	10432	2.6907	0.99643	0.003565	0.00713	0.038336	TRUE	185	154	379	758
ADH6_356_TGCTGCAATCAATACTGCCA	ADH6	327.59	464.06	0.50113	9382.2	4678	1.9953	0.97699	0.023005	0.04601	0.14757	TRUE	158	105	152	381
ADH7_357_AAGACGACGCAAGTGGAACC	ADH7	532.6	389.58	-0.45013	10289	8970.7	1.51	0.065521	0.93448	0.13104	0.29829	FALSE	76	95	428	313
ADH7_358_CCTACTCGCTCCTAATGCAA	ADH7	35.929	71.614	0.97549	655.2	249.76	2.258	0.98789	0.012111	0.024223	0.094259	TRUE	28	36	6	39
ADH7_359_CTTGGGACTGATACACTCAG	ADH7	225.09	316.06	0.48787	4167.5	2833.4	1.709	0.95628	0.043723	0.087446	0.22776	TRUE	55	51	158	280
ADH7_360_TACATTTACCGAGTACACAG	ADH7	61.291	36.285	-0.74045	317.96	504.13	1.1137	0.12994	0.87006	0.25987	0.46159	FALSE	22	17	36	21
ADHFE1_60513_AACCGGGAGTGAAACTACTG	ADHFE1	373.03	313.19	-0.25151	1793.7	5566.1	0.80205	0.21126	0.78874	0.42252	0.61964	FALSE	140	108	213	220
ADHFE1_60514_AGGATCAATCAGTCCCAGTG	ADHFE1	811.58	901.39	0.15123	4035.2	15795	0.71457	0.76256	0.23744	0.47488	0.6664	TRUE	164	165	604	779
ADHFE1_60515_TGTCGGTGGTGGCTCTACCA	ADHFE1	28.532	34.375	0.26044	17.106	184.7	0.42992	0.66029	0.33971	0.67941	0.81735	TRUE	10	10	17	26
ADHFE1_60516_TTTGGGCTATCCACGCGCTG	ADHFE1	442.78	287.41	-0.6217	12209	7002.7	1.8566	0.031684	0.96832	0.063367	0.18339	FALSE	129	118	290	183
ADI1_42103_CAGTGGGTACTTCGATGTGA	ADI1	625.59	339.93	-0.87806	41736	11134	2.7073	0.0033914	0.99661	0.0067828	0.036905	FALSE	155	133	437	223
ADI1_42104_CTAGATTAAGATGTTCTACG	ADI1	53.894	112.67	1.0502	1784.8	425.52	2.8495	0.9978	0.0021994	0.0043988	0.026495	TRUE	40	19	11	99
ADI1_42105_CTGGTATATGGACGACGCCC	ADI1	695.34	390.54	-0.83064	47405	12832	2.6908	0.0035645	0.99644	0.007129	0.038333	FALSE	74	85	584	324
ADI1_42106_TATGGTTATGATGTCCATCC	ADI1	295.89	181.42	-0.70264	6648.2	4082.7	1.7914	0.036609	0.96339	0.073218	0.20218	FALSE	86	58	194	132
ADIG_62217_AATGTGAGGTCGTTCACCAG	ADIG	198.67	345.66	0.79591	11007	2398.8	3.0012	0.99866	0.0013447	0.0026893	0.017932	TRUE	107	109	81	253
ADIG_62218_ATAACAACAGCAAACCCACA	ADIG	255.73	218.66	-0.22498	688.15	3359.8	0.63954	0.26123	0.73877	0.52246	0.704	FALSE	98	30	144	199
ADIG_62219_GGAGGCAGAACCAGAAAACC	ADIG	82.426	21.007	-1.9225	2089.4	745.61	2.2493	0.010991	0.98901	0.021981	0.087805	FALSE	17	11	61	11
ADIG_62220_TCGTATCTCCACAGATTCAG	ADIG	229.31	195.75	-0.22727	564.29	2904.6	0.62285	0.26668	0.73332	0.53337	0.71274	FALSE	59	69	158	136
ADIPOQ_24629_GAAACCACGACTCAAGGGCC	ADIPOQ	334.99	274.04	-0.28875	1861.8	4819.8	0.87785	0.19001	0.80999	0.38003	0.58187	FALSE	70	78	247	209
ADIPOQ_24630_GTTGCAGTGGAATTTACCAG	ADIPOQ	98.278	210.07	1.0882	6468.4	941.15	3.644	0.99987	0.00013431	0.00026862	0.0026676	TRUE	35	46	58	174
ADIPOQ_24631_TACCGCTCAGCATTCAGTGT	ADIPOQ	373.03	201.48	-0.88542	15059	5566.1	2.2995	0.010738	0.98926	0.021477	0.086264	FALSE	101	124	252	87
ADIPOQ_24632_TGGATTCCCGGAAAGCCTCG	ADIPOQ	371.98	259.72	-0.51657	6350.9	5545	1.5075	0.065845	0.93415	0.13169	0.29934	FALSE	85	112	267	160
ADIPOR1_37775_CCAGGACACAGACGATGGAG	ADIPOR1	321.25	107.9	-1.5652	24371	4557.3	3.1604	0.00078672	0.99921	0.0015734	0.011675	FALSE	63	35	241	78
ADIPOR1_37776_GACAACGACTATCTGCTACA	ADIPOR1	184.93	179.51	-0.042659	14.674	2180.3	0.11602	0.4538	0.5462	0.9076	0.95567	FALSE	77	78	98	110
ADIPOR1_37777_GTATATGTTCTAGGTCTGGG	ADIPOR1	261.02	199.57	-0.38558	1896.6	3452.8	1.0458	0.14783	0.85217	0.29565	0.50001	FALSE	93	56	154	153
ADIPOR1_37778_TTTCTCTGAATGACAATAGA	ADIPOR1	35.929	138.45	1.917	5809.3	249.76	6.4874	1	4.4165e-11	8.8329e-11	2.4721e-09	TRUE	16	28	18	117
ADIPOR2_49363_ACAGGAAGAATACACAACCT	ADIPOR2	457.57	492.71	0.10651	617.47	7318.1	0.41072	0.65936	0.34064	0.68128	0.81874	TRUE	123	118	310	398
ADIPOR2_49364_AGTCTACTGCCACTCAGAGG	ADIPOR2	405.79	348.52	-0.2189	1642.2	6230.3	0.72553	0.23406	0.76594	0.46813	0.66075	FALSE	86	115	298	250
ADIPOR2_49365_ATGATGGGCTTGTAAGAGAG	ADIPOR2	414.25	429.69	0.052676	119.23	6404.8	0.19295	0.5765	0.4235	0.847	0.92175	TRUE	144	145	248	305
ADIPOR2_49366_CTCATGATGTACTACCAGAC	ADIPOR2	725.99	335.16	-1.1128	79155	13597	3.3517	0.00040163	0.9996	0.00080327	0.006752	FALSE	162	113	525	238
ADIRF_29727_AGCGGCAGCTCAGCAAGTGG	ADIRF	91.937	87.847	-0.06493	8.3651	861.57	0.13934	0.44411	0.55589	0.88822	0.94457	FALSE	23	15	64	77
ADIRF_29728_AGTGGTGGACCAGGCCACAG	ADIRF	173.31	167.1	-0.052304	19.26	1999.7	0.13879	0.44478	0.55522	0.88956	0.94532	FALSE	45	49	119	126
ADIRF_29729_CCAGCTGGCCAAGACCACCC	ADIRF	369.86	206.25	-0.83951	13666	5502.9	2.2056	0.013707	0.98629	0.027414	0.10296	FALSE	73	80	277	136
ADIRF_29730_GCCACAGAGGCGGGGCAGAA	ADIRF	453.34	269.27	-0.74938	17226	7227.6	2.1652	0.015186	0.98481	0.030373	0.11091	FALSE	64	51	365	231
ADK_361_AAAGTCGAATATCATGCTGG	ADK	478.71	488.89	0.030299	51.83	7774.8	0.11547	0.54596	0.45404	0.90808	0.95577	TRUE	162	159	291	353
ADK_362_ACAGCAGAGATGTCAAGCAG	ADK	402.62	651.21	0.69234	31341	6165.2	3.166	0.99923	0.00077265	0.0015453	0.011509	TRUE	110	134	271	548
ADK_363_GTAGTAATGAGCATCCACAT	ADK	392.05	457.38	0.22181	2136.8	5949.4	0.84691	0.80148	0.19852	0.39705	0.59757	TRUE	154	134	217	345
ADK_364_TCTGGAGAAAAACTGGATGT	ADK	258.9	338.02	0.3834	3143.6	3415.5	1.3538	0.91209	0.087906	0.17581	0.36001	TRUE	95	85	150	269
ADM_365_CGACGCGACATCCAACCGAG	ADM	114.13	150.87	0.39957	678.15	1147.6	1.0845	0.86088	0.13912	0.27824	0.48185	TRUE	43	31	65	127
ADM_366_CTAGGAAGGCGAGCGAACCC	ADM	100.39	214.84	1.0901	6780.7	968.07	3.6785	0.99988	0.00011738	0.00023476	0.0023768	TRUE	43	35	52	190
ADM_367_GCACCGTGCACGTCCCGAAG	ADM	310.68	267.36	-0.21591	939.77	4357.9	0.65627	0.25582	0.74418	0.51165	0.69578	FALSE	74	74	220	206
ADM_368_TCTGGCGGTAGCGCTTGACT	ADM	138.43	192.88	0.47559	1492.4	1483	1.4139	0.92129	0.078714	0.15743	0.33576	TRUE	39	45	92	157
ADM2_50371_ACCCGCGACCCGTCAAACCC	ADM2	877.1	778.21	-0.17237	4894	17533	0.74684	0.22758	0.77242	0.45516	0.64946	FALSE	200	207	630	608
ADM2_50372_AGCTTCCAGACCACAGGTCG	ADM2	278.98	275	-0.020665	7.928	3773.9	0.064818	0.47416	0.52584	0.94832	0.9755	FALSE	90	84	174	204
ADM2_50373_GAGAGGCTGACCCATAACAG	ADM2	419.53	481.25	0.19757	1906.9	6514.5	0.7647	0.77777	0.22223	0.44445	0.63997	TRUE	176	157	221	347
ADM2_50374_GAGGAGGCTGATGCAACCCA	ADM2	289.55	231.08	-0.32418	1715	3966.2	0.92847	0.17658	0.82342	0.35316	0.55698	FALSE	40	56	234	186
ADM5_64593_GGCGGCGCCCATAGCTGTAG	ADM5	883.44	1004.5	0.18509	7336.6	17704	0.90993	0.81857	0.18143	0.36286	0.56606	TRUE	238	266	598	786
ADM5_64594_GGTGGGTCCGGCATACGCCC	ADM5	71.859	128.91	0.83429	1661.4	621.92	2.2875	0.9889	0.011104	0.022209	0.088499	TRUE	24	28	44	107
ADM5_64595_TCCAGTATATGATCTCCGCC	ADM5	451.23	531.86	0.23669	3255.7	7182.5	0.95134	0.82928	0.17072	0.34143	0.54572	TRUE	161	158	266	399
ADM5_64596_TCTCCACCAAGGAGCCCTCG	ADM5	1.0567	1.9097	0.50051	2.5593	2.8043	0.50936	0.58525	0.41475	0.82949	0.91134	TRUE	0	0	0	2
[truncated: 75,881 more rows]
